# Supplementary material for: Microbial genetic and transcriptional contributions to oxalate degradation by the gut microbiota in health and disease
Source: eLife. 2021 Mar 26;10:e63642. doi: 10.7554/eLife.63642 (PMC8062136; doi:10.7554/eLife.63642)
Supplement: Figure 2—source data 1. [file elife-63642-fig2-data1.xlsx]

## Sheet: Sheet1
Study	Assay	Phenotype	enzyme	subject	RPKM
Crohn's Disease	MTG	Crohn's Disease	oxdd	C2086	0.0308707
AMP	MTG	Healthy	oxdd	Thomson	0.0345434
AMP	MTG	Healthy	frc	Breezer	1.70531
AMP	MTG	Healthy	frc	Commencal	2.11889
AMP	MTG	Healthy	frc	Cove	0.112339
AMP	MTG	Healthy	frc	Crank	1.05889
AMP	MTG	Healthy	frc	Deity	0.335255
AMP	MTG	Healthy	frc	Devinci	0.997853
AMP	MTG	Healthy	frc	Easton	0.0654239
AMP	MTG	Healthy	frc	Giant	0.437072
AMP	MTG	Healthy	frc	Huffy	5.60011
AMP	MTG	Healthy	frc	Ibis	2.1209
AMP	MTG	Healthy	frc	Intense	1.74375
AMP	MTG	Healthy	frc	IronHorse	0.744121
AMP	MTG	Healthy	frc	Jamis	0.0189927
AMP	MTG	Healthy	frc	Juliana	1.05415
AMP	MTG	Healthy	frc	Knolly	9.00937
AMP	MTG	Healthy	frc	Merlin	1.45918
AMP	MTG	Healthy	frc	Mongoose	0.64192
AMP	MTG	Healthy	frc	Niner	1.6621
AMP	MTG	Healthy	frc	Norco	0.107963
AMP	MTG	Healthy	frc	Pivot	0.253342
AMP	MTG	Healthy	frc	Saint	0.0588096
AMP	MTG	Healthy	frc	SantaCruz	4.90514
AMP	MTG	Healthy	frc	Schwinn	4.42828
AMP	MTG	Healthy	frc	Scott	0.599268
AMP	MTG	Healthy	frc	Speedplay	9.64924
AMP	MTG	Healthy	frc	SRAM	6.39166
AMP	MTG	Healthy	frc	Thomson	0.66812
AMP	MTG	Healthy	frc	Trek	0.0791984
AMP	MTG	Healthy	frc	Zipp	0.140719
AMP	MTG	Healthy	oxc	Breezer	0.73024
AMP	MTG	Healthy	oxc	Commencal	1.35309
AMP	MTG	Healthy	oxc	Crank	0.780212
AMP	MTG	Healthy	oxc	Deity	0.166608
AMP	MTG	Healthy	oxc	Devinci	0.61468
AMP	MTG	Healthy	oxc	Easton	0.0511619
AMP	MTG	Healthy	oxc	Giant	0.202757
AMP	MTG	Healthy	oxc	Huffy	6.75979
AMP	MTG	Healthy	oxc	Ibis	1.77311
AMP	MTG	Healthy	oxc	Intense	1.19898
AMP	MTG	Healthy	oxc	IronHorse	0.54024
AMP	MTG	Healthy	oxc	Juliana	1.30107
AMP	MTG	Healthy	oxc	Knolly	3.41553
AMP	MTG	Healthy	oxc	Merlin	0.88732
AMP	MTG	Healthy	oxc	Mongoose	0.436309
AMP	MTG	Healthy	oxc	Niner	1.2576
AMP	MTG	Healthy	oxc	SantaCruz	2.24244
AMP	MTG	Healthy	oxc	Schwinn	2.17186
AMP	MTG	Healthy	oxc	Scott	0.206507
AMP	MTG	Healthy	oxc	Speedplay	6.36827
AMP	MTG	Healthy	oxc	SRAM	2.16764
AMP	MTG	Healthy	oxc	Thomson	0.580257
AMP	MTG	Healthy	oxc	Zipp	0.131381
AMP	MTS	Healthy	oxdd	Commencal	0.0609465
AMP	MTS	Healthy	oxdd	Giant	0.0720467
AMP	MTS	Healthy	oxdd	Knolly	0.159792
AMP	MTS	Healthy	oxdd	Merlin	0.16662
AMP	MTS	Healthy	oxdd	Yeti	0.0173686
AMP	MTS	Healthy	frc	Commencal	1.58203
AMP	MTS	Healthy	frc	Cove	0.0395014
AMP	MTS	Healthy	frc	Crank	0.264776
AMP	MTS	Healthy	frc	Deity	1.19485
AMP	MTS	Healthy	frc	Devinci	0.0588882
AMP	MTS	Healthy	frc	Enve	0.0201332
AMP	MTS	Healthy	frc	Giant	4.87657
AMP	MTS	Healthy	frc	Huffy	0.056413
AMP	MTS	Healthy	frc	Ibis	4.579
AMP	MTS	Healthy	frc	Intense	5.64286
AMP	MTS	Healthy	frc	Juliana	0.0545775
AMP	MTS	Healthy	frc	Knolly	0.690554
AMP	MTS	Healthy	frc	Merlin	5.58774
AMP	MTS	Healthy	frc	Mongoose	0.124356
AMP	MTS	Healthy	frc	Niner	0.224267
AMP	MTS	Healthy	frc	Norco	0.844241
AMP	MTS	Healthy	frc	Pinarello	0.155091
AMP	MTS	Healthy	frc	Pivot	0.0837702
AMP	MTS	Healthy	frc	Saint	0.0214416
AMP	MTS	Healthy	frc	SantaCruz	7.39619
AMP	MTS	Healthy	frc	Schwinn	0.72771
AMP	MTS	Healthy	frc	Speedplay	0.754043
AMP	MTS	Healthy	frc	SRAM	8.02039
AMP	MTS	Healthy	frc	Thomson	1.45414
AMP	MTS	Healthy	frc	Yeti	0.0467952
AMP	MTS	Healthy	frc	Zipp	1.31767
AMP	MTS	Healthy	oxc	Breezer	0.17815
AMP	MTS	Healthy	oxc	Commencal	0.67642
AMP	MTS	Healthy	oxc	Cove	0.0318672
AMP	MTS	Healthy	oxc	Crank	0.212854
AMP	MTS	Healthy	oxc	Deity	0.98358
AMP	MTS	Healthy	oxc	Giant	7.87782
AMP	MTS	Healthy	oxc	Huffy	0.0424792
AMP	MTS	Healthy	oxc	Ibis	1.96293
AMP	MTS	Healthy	oxc	Intense	3.03648
AMP	MTS	Healthy	oxc	Juliana	0.0205626
AMP	MTS	Healthy	oxc	Knolly	0.8401
AMP	MTS	Healthy	oxc	Merlin	6.11488
AMP	MTS	Healthy	oxc	Mongoose	0.139624
AMP	MTS	Healthy	oxc	Niner	0.715743
AMP	MTS	Healthy	oxc	Norco	1.03117
AMP	MTS	Healthy	oxc	Saint	0.0477113
AMP	MTS	Healthy	oxc	SantaCruz	0.969038
AMP	MTS	Healthy	oxc	Schwinn	0.957185
AMP	MTS	Healthy	oxc	Speedplay	0.807097
AMP	MTS	Healthy	oxc	SRAM	1.88145
AMP	MTS	Healthy	oxc	Thomson	3.52211
AMP	MTS	Healthy	oxc	Yeti	0.0243348
AMP	MTS	Healthy	oxc	Zipp	2.58485
fran	MTG	Healthy	oxdd	X310763260	0.0394671
fran	MTG	Healthy	oxdd	X319146421	0.0712882
fran	MTG	Healthy	frc	X310763260	22.6144
fran	MTG	Healthy	frc	X311245214	1.21186
fran	MTG	Healthy	frc	X316192082	0.643626
fran	MTG	Healthy	frc	X316701492	0.107499
fran	MTG	Healthy	frc	X317690558	3.79126
fran	MTG	Healthy	frc	X317802115	0.514908
fran	MTG	Healthy	frc	X317822438	0.637085
fran	MTG	Healthy	frc	X319146421	0.13602
fran	MTG	Healthy	oxc	X310763260	19.6791
fran	MTG	Healthy	oxc	X311245214	1.27735
fran	MTG	Healthy	oxc	X316192082	0.400278
fran	MTG	Healthy	oxc	X317690558	1.99548
fran	MTG	Healthy	oxc	X317802115	0.284843
fran	MTG	Healthy	oxc	X317822438	0.45664
fran	MTG	Healthy	oxc	X319146421	0.0501606
fran	MTS	Healthy	oxdd	X310763260	0.0889062
fran	MTS	Healthy	oxdd	X317802115	0.084878
fran	MTS	Healthy	oxdd	X317822438	0.0804969
fran	MTS	Healthy	oxdd	X319146421	0.15807
fran	MTS	Healthy	frc	X310763260	49.9626
fran	MTS	Healthy	frc	X311245214	3.34859
fran	MTS	Healthy	frc	X316192082	7.4794
fran	MTS	Healthy	frc	X316701492	2.14344
fran	MTS	Healthy	frc	X317690558	15.8029
fran	MTS	Healthy	frc	X317802115	9.38828
fran	MTS	Healthy	frc	X317822438	3.66327
fran	MTS	Healthy	frc	X319146421	47.4747
fran	MTS	Healthy	oxc	X310763260	35.5764
fran	MTS	Healthy	oxc	X311245214	2.96058
fran	MTS	Healthy	oxc	X316192082	3.856
fran	MTS	Healthy	oxc	X316701492	1.22236
fran	MTS	Healthy	oxc	X317690558	9.36988
fran	MTS	Healthy	oxc	X317802115	4.37412
fran	MTS	Healthy	oxc	X317822438	1.50732
fran	MTS	Healthy	oxc	X319146421	33.757
HMP2	MTG	Healthy	oxdd	C4008	0.150094
HMP2	MTG	Healthy	oxdd	H4008	0.0480659
HMP2	MTG	Healthy	oxdd	M2041	0.032336
HMP2	MTG	Healthy	oxdd	M2042	0.0218619
HMP2	MTG	Healthy	oxdd	M2048	0.0758466
HMP2	MTG	Healthy	oxdd	M2061	0.029708
HMP2	MTG	Healthy	oxdd	M2072	0.0361065
HMP2	MTG	Healthy	oxdd	M2075	0.0444321
HMP2	MTG	Healthy	frc	C2039	0.0653876
HMP2	MTG	Healthy	frc	C2047	2.85386
HMP2	MTG	Healthy	frc	C2072	0.0336967
HMP2	MTG	Healthy	frc	C3022	33.1767
HMP2	MTG	Healthy	frc	C4008	14.6048
HMP2	MTG	Healthy	frc	C4009	0.544139
HMP2	MTG	Healthy	frc	C4016	0.36783
HMP2	MTG	Healthy	frc	C6018	2.33876
HMP2	MTG	Healthy	frc	E5002	3.12649
HMP2	MTG	Healthy	frc	H4008	5.33702
HMP2	MTG	Healthy	frc	H4009	0.907204
HMP2	MTG	Healthy	frc	H4013	0.0420929
HMP2	MTG	Healthy	frc	H4016	0.345948
HMP2	MTG	Healthy	frc	H4018	2.41627
HMP2	MTG	Healthy	frc	H4022	4.40647
HMP2	MTG	Healthy	frc	H4023	0.470961
HMP2	MTG	Healthy	frc	H4024	0.273351
HMP2	MTG	Healthy	frc	H4045	4.04535
HMP2	MTG	Healthy	frc	M2039	0.215932
HMP2	MTG	Healthy	frc	M2041	0.963437
HMP2	MTG	Healthy	frc	M2042	0.547787
HMP2	MTG	Healthy	frc	M2047	1.52679
HMP2	MTG	Healthy	frc	M2048	1.68626
HMP2	MTG	Healthy	frc	M2060	0.297011
HMP2	MTG	Healthy	frc	M2061	2.59419
HMP2	MTG	Healthy	frc	M2072	0.606436
HMP2	MTG	Healthy	frc	M2075	0.839783
HMP2	MTG	Healthy	frc	M2077	0.447098
HMP2	MTG	Healthy	frc	M2079	0.486177
HMP2	MTG	Healthy	frc	M2084	0.130141
HMP2	MTG	Healthy	frc	M2097	0.314213
HMP2	MTG	Healthy	frc	P6014	7.09999
HMP2	MTG	Healthy	frc	P6017	0.164879
HMP2	MTG	Healthy	frc	P6018	3.48408
HMP2	MTG	Healthy	oxc	C2039	0.024818
HMP2	MTG	Healthy	oxc	C2047	0.834727
HMP2	MTG	Healthy	oxc	C2084	0.0511286
HMP2	MTG	Healthy	oxc	C3022	22.4461
HMP2	MTG	Healthy	oxc	C4008	14.0203
HMP2	MTG	Healthy	oxc	C4009	0.625499
HMP2	MTG	Healthy	oxc	C4016	0.301452
HMP2	MTG	Healthy	oxc	C6018	2.016
HMP2	MTG	Healthy	oxc	E5002	2.01632
HMP2	MTG	Healthy	oxc	H4008	5.17087
HMP2	MTG	Healthy	oxc	H4009	0.640071
HMP2	MTG	Healthy	oxc	H4013	0.112604
HMP2	MTG	Healthy	oxc	H4016	0.240989
HMP2	MTG	Healthy	oxc	H4018	1.8384
HMP2	MTG	Healthy	oxc	H4022	4.18406
HMP2	MTG	Healthy	oxc	H4023	0.537962
HMP2	MTG	Healthy	oxc	H4024	0.164082
HMP2	MTG	Healthy	oxc	H4045	5.42135
HMP2	MTG	Healthy	oxc	M2039	0.103999
HMP2	MTG	Healthy	oxc	M2041	0.86798
HMP2	MTG	Healthy	oxc	M2042	0.275646
HMP2	MTG	Healthy	oxc	M2047	0.832466
HMP2	MTG	Healthy	oxc	M2048	1.12233
HMP2	MTG	Healthy	oxc	M2060	0.201928
HMP2	MTG	Healthy	oxc	M2061	1.99271
HMP2	MTG	Healthy	oxc	M2072	0.405278
HMP2	MTG	Healthy	oxc	M2075	0.496832
HMP2	MTG	Healthy	oxc	M2077	0.260758
HMP2	MTG	Healthy	oxc	M2079	0.329658
HMP2	MTG	Healthy	oxc	M2084	0.06654
HMP2	MTG	Healthy	oxc	M2097	0.449418
HMP2	MTG	Healthy	oxc	P6014	2.96323
HMP2	MTG	Healthy	oxc	P6017	0.0645813
HMP2	MTG	Healthy	oxc	P6018	3.41418
HMP2	MTS	Healthy	frc	C3022	3.72291
HMP2	MTS	Healthy	frc	E5002	1.72831
HMP2	MTS	Healthy	frc	H4008	1.01746
HMP2	MTS	Healthy	frc	H4009	0.44554
HMP2	MTS	Healthy	frc	H4018	0.165886
HMP2	MTS	Healthy	frc	H4023	0.553264
HMP2	MTS	Healthy	frc	H4024	0.329134
HMP2	MTS	Healthy	frc	H4045	1.51919
HMP2	MTS	Healthy	frc	M2041	0.0619261
HMP2	MTS	Healthy	frc	M2042	1.17659
HMP2	MTS	Healthy	frc	M2047	3.73618
HMP2	MTS	Healthy	frc	M2048	0.831969
HMP2	MTS	Healthy	frc	M2060	0.553818
HMP2	MTS	Healthy	frc	M2061	2.02317
HMP2	MTS	Healthy	frc	M2075	0.616115
HMP2	MTS	Healthy	frc	M2077	0.0400595
HMP2	MTS	Healthy	frc	M2079	0.107181
HMP2	MTS	Healthy	frc	M2097	0.418814
HMP2	MTS	Healthy	frc	P6018	0.410478
HMP2	MTS	Healthy	oxc	C3022	3.02087
HMP2	MTS	Healthy	oxc	E5002	0.907151
HMP2	MTS	Healthy	oxc	H4009	0.697684
HMP2	MTS	Healthy	oxc	H4023	0.48324
HMP2	MTS	Healthy	oxc	H4024	0.412607
HMP2	MTS	Healthy	oxc	H4045	0.495042
HMP2	MTS	Healthy	oxc	M2039	0.0208877
HMP2	MTS	Healthy	oxc	M2041	0.0373606
HMP2	MTS	Healthy	oxc	M2042	0.738309
HMP2	MTS	Healthy	oxc	M2047	1.97291
HMP2	MTS	Healthy	oxc	M2048	0.676682
HMP2	MTS	Healthy	oxc	M2060	2.72093
HMP2	MTS	Healthy	oxc	M2061	1.25186
HMP2	MTS	Healthy	oxc	M2075	0.517637
HMP2	MTS	Healthy	oxc	M2079	0.276422
HMP2	MTS	Healthy	oxc	M2097	0.394941
HMP2	MTS	Healthy	oxc	P6018	0.153897
MetaHit	MTG	Healthy	oxdd	MH0067	0.0368031
MetaHit	MTG	Healthy	oxdd	MH0068	0.0426477
MetaHit	MTG	Healthy	oxdd	MH0086	0.0223061
MetaHit	MTG	Healthy	oxdd	MH0101	0.097616
MetaHit	MTG	Healthy	oxdd	MH0102	0.0192815
MetaHit	MTG	Healthy	oxdd	MH0104	0.0501462
MetaHit	MTG	Healthy	oxdd	MH0116	0.0835746
MetaHit	MTG	Healthy	oxdd	MH0118	0.023547
MetaHit	MTG	Healthy	oxdd	MH0148	0.0791749
MetaHit	MTG	Healthy	oxdd	MH0152	0.0268096
MetaHit	MTG	Healthy	oxdd	MH0153	0.013969
MetaHit	MTG	Healthy	oxdd	MH0159	0.0451115
MetaHit	MTG	Healthy	oxdd	MH0169	0.0113349
MetaHit	MTG	Healthy	oxdd	MH0181	0.00912152
MetaHit	MTG	Healthy	oxdd	MH0184	0.0719733
MetaHit	MTG	Healthy	oxdd	MH0203	0.00690523
MetaHit	MTG	Healthy	oxdd	MH0220	0.0212066
MetaHit	MTG	Healthy	oxdd	MH0239	0.0104046
MetaHit	MTG	Healthy	oxdd	MH0250	0.0107749
MetaHit	MTG	Healthy	oxdd	MH0257	0.0068928
MetaHit	MTG	Healthy	oxdd	MH0275	0.0129823
MetaHit	MTG	Healthy	oxdd	MH0286	0.00816623
MetaHit	MTG	Healthy	oxdd	MH0287	0.0213018
MetaHit	MTG	Healthy	oxdd	MH0288	0.00697679
MetaHit	MTG	Healthy	oxdd	MH0305	0.0160297
MetaHit	MTG	Healthy	oxdd	MH0313	0.00773433
MetaHit	MTG	Healthy	oxdd	MH0316	0.00646064
MetaHit	MTG	Healthy	oxdd	MH0408	0.00602347
MetaHit	MTG	Healthy	oxdd	MH0416	0.00668411
MetaHit	MTG	Healthy	oxdd	MH0417	0.00623806
MetaHit	MTG	Healthy	oxdd	MH0418	0.00694069
MetaHit	MTG	Healthy	oxdd	MH0424	0.0073081
MetaHit	MTG	Healthy	oxdd	MH0429	0.00879666
MetaHit	MTG	Healthy	oxdd	MH0433	0.0207495
MetaHit	MTG	Healthy	oxdd	MH0440	0.0122496
MetaHit	MTG	Healthy	oxdd	MH0445	0.0280248
MetaHit	MTG	Healthy	oxdd	MH0448	0.00644301
MetaHit	MTG	Healthy	oxdd	MH0454	0.0065433
MetaHit	MTG	Healthy	oxdd	MH0457	0.0189642
MetaHit	MTG	Healthy	oxdd	MH0462	0.0432167
MetaHit	MTG	Healthy	frc	MH0002	0.902747
MetaHit	MTG	Healthy	frc	MH0003	0.6802
MetaHit	MTG	Healthy	frc	MH0006	0.0493153
MetaHit	MTG	Healthy	frc	MH0009	0.860797
MetaHit	MTG	Healthy	frc	MH0011	0.25283
MetaHit	MTG	Healthy	frc	MH0012	0.579124
MetaHit	MTG	Healthy	frc	MH0014	16.6801
MetaHit	MTG	Healthy	frc	MH0016	0.0957762
MetaHit	MTG	Healthy	frc	MH0025	3.89901
MetaHit	MTG	Healthy	frc	MH0032	0.829218
MetaHit	MTG	Healthy	frc	MH0033	0.614282
MetaHit	MTG	Healthy	frc	MH0035	0.048056
MetaHit	MTG	Healthy	frc	MH0037	0.21506
MetaHit	MTG	Healthy	frc	MH0038	0.491781
MetaHit	MTG	Healthy	frc	MH0039	0.573187
MetaHit	MTG	Healthy	frc	MH0041	0.0573598
MetaHit	MTG	Healthy	frc	MH0043	0.120463
MetaHit	MTG	Healthy	frc	MH0044	0.48068
MetaHit	MTG	Healthy	frc	MH0047	0.335603
MetaHit	MTG	Healthy	frc	MH0048	0.261945
MetaHit	MTG	Healthy	frc	MH0050	0.371892
MetaHit	MTG	Healthy	frc	MH0052	0.64534
MetaHit	MTG	Healthy	frc	MH0053	0.126924
MetaHit	MTG	Healthy	frc	MH0054	0.539617
MetaHit	MTG	Healthy	frc	MH0055	0.270592
MetaHit	MTG	Healthy	frc	MH0056	0.696935
MetaHit	MTG	Healthy	frc	MH0058	0.308457
MetaHit	MTG	Healthy	frc	MH0059	0.290436
MetaHit	MTG	Healthy	frc	MH0060	0.798895
MetaHit	MTG	Healthy	frc	MH0061	0.304131
MetaHit	MTG	Healthy	frc	MH0062	0.607547
MetaHit	MTG	Healthy	frc	MH0065	0.112799
MetaHit	MTG	Healthy	frc	MH0066	0.0570404
MetaHit	MTG	Healthy	frc	MH0068	0.237316
MetaHit	MTG	Healthy	frc	MH0069	0.0345344
MetaHit	MTG	Healthy	frc	MH0070	0.154107
MetaHit	MTG	Healthy	frc	MH0071	0.215941
MetaHit	MTG	Healthy	frc	MH0074	0.517487
MetaHit	MTG	Healthy	frc	MH0075	0.619965
MetaHit	MTG	Healthy	frc	MH0076	0.127485
MetaHit	MTG	Healthy	frc	MH0077	0.692111
MetaHit	MTG	Healthy	frc	MH0078	0.144629
MetaHit	MTG	Healthy	frc	MH0079	1.79585
MetaHit	MTG	Healthy	frc	MH0080	0.167093
MetaHit	MTG	Healthy	frc	MH0081	0.0592433
MetaHit	MTG	Healthy	frc	MH0082	1.31907
MetaHit	MTG	Healthy	frc	MH0083	1.33254
MetaHit	MTG	Healthy	frc	MH0086	1.59523
MetaHit	MTG	Healthy	frc	MH0087	1.04394
MetaHit	MTG	Healthy	frc	MH0088	0.0952319
MetaHit	MTG	Healthy	frc	MH0089	0.477547
MetaHit	MTG	Healthy	frc	MH0090	0.975282
MetaHit	MTG	Healthy	frc	MH0091	0.142793
MetaHit	MTG	Healthy	frc	MH0092	0.259505
MetaHit	MTG	Healthy	frc	MH0093	17.3806
MetaHit	MTG	Healthy	frc	MH0094	0.0724487
MetaHit	MTG	Healthy	frc	MH0095	16.7078
MetaHit	MTG	Healthy	frc	MH0097	9.13504
MetaHit	MTG	Healthy	frc	MH0098	0.142878
MetaHit	MTG	Healthy	frc	MH0099	1.51637
MetaHit	MTG	Healthy	frc	MH0100	1.93234
MetaHit	MTG	Healthy	frc	MH0101	1.07298
MetaHit	MTG	Healthy	frc	MH0102	0.174199
MetaHit	MTG	Healthy	frc	MH0103	0.10133
MetaHit	MTG	Healthy	frc	MH0104	0.460303
MetaHit	MTG	Healthy	frc	MH0105	0.324768
MetaHit	MTG	Healthy	frc	MH0106	0.826173
MetaHit	MTG	Healthy	frc	MH0107	0.572401
MetaHit	MTG	Healthy	frc	MH0110	0.298323
MetaHit	MTG	Healthy	frc	MH0111	0.0561436
MetaHit	MTG	Healthy	frc	MH0113	1.83447
MetaHit	MTG	Healthy	frc	MH0115	0.402917
MetaHit	MTG	Healthy	frc	MH0116	2.62773
MetaHit	MTG	Healthy	frc	MH0117	0.536861
MetaHit	MTG	Healthy	frc	MH0118	0.535587
MetaHit	MTG	Healthy	frc	MH0119	0.167244
MetaHit	MTG	Healthy	frc	MH0120	0.420071
MetaHit	MTG	Healthy	frc	MH0121	17.829
MetaHit	MTG	Healthy	frc	MH0122	0.126302
MetaHit	MTG	Healthy	frc	MH0123	0.720986
MetaHit	MTG	Healthy	frc	MH0124	2.06004
MetaHit	MTG	Healthy	frc	MH0125	0.385545
MetaHit	MTG	Healthy	frc	MH0126	0.654784
MetaHit	MTG	Healthy	frc	MH0127	0.071306
MetaHit	MTG	Healthy	frc	MH0128	0.0207525
MetaHit	MTG	Healthy	frc	MH0129	2.45326
MetaHit	MTG	Healthy	frc	MH0130	0.0792848
MetaHit	MTG	Healthy	frc	MH0131	0.0422393
MetaHit	MTG	Healthy	frc	MH0132	0.438484
MetaHit	MTG	Healthy	frc	MH0133	0.15967
MetaHit	MTG	Healthy	frc	MH0134	0.582749
MetaHit	MTG	Healthy	frc	MH0135	1.82241
MetaHit	MTG	Healthy	frc	MH0138	0.0158575
MetaHit	MTG	Healthy	frc	MH0139	0.0129642
MetaHit	MTG	Healthy	frc	MH0140	0.486766
MetaHit	MTG	Healthy	frc	MH0141	0.381547
MetaHit	MTG	Healthy	frc	MH0142	1.33604
MetaHit	MTG	Healthy	frc	MH0143	0.537198
MetaHit	MTG	Healthy	frc	MH0144	0.780288
MetaHit	MTG	Healthy	frc	MH0145	1.21979
MetaHit	MTG	Healthy	frc	MH0146	0.040456
MetaHit	MTG	Healthy	frc	MH0147	0.238428
MetaHit	MTG	Healthy	frc	MH0149	0.181261
MetaHit	MTG	Healthy	frc	MH0150	0.909086
MetaHit	MTG	Healthy	frc	MH0151	0.0481488
MetaHit	MTG	Healthy	frc	MH0153	0.337143
MetaHit	MTG	Healthy	frc	MH0154	1.81694
MetaHit	MTG	Healthy	frc	MH0156	0.0657798
MetaHit	MTG	Healthy	frc	MH0157	0.342971
MetaHit	MTG	Healthy	frc	MH0158	0.479659
MetaHit	MTG	Healthy	frc	MH0159	3.08213
MetaHit	MTG	Healthy	frc	MH0160	0.0864294
MetaHit	MTG	Healthy	frc	MH0161	0.0174705
MetaHit	MTG	Healthy	frc	MH0163	1.22997
MetaHit	MTG	Healthy	frc	MH0164	0.0123244
MetaHit	MTG	Healthy	frc	MH0165	0.08929
MetaHit	MTG	Healthy	frc	MH0167	0.0774743
MetaHit	MTG	Healthy	frc	MH0168	2.42266
MetaHit	MTG	Healthy	frc	MH0169	0.0213847
MetaHit	MTG	Healthy	frc	MH0170	0.209109
MetaHit	MTG	Healthy	frc	MH0173	0.034049
MetaHit	MTG	Healthy	frc	MH0174	0.91751
MetaHit	MTG	Healthy	frc	MH0175	0.0124627
MetaHit	MTG	Healthy	frc	MH0176	0.179011
MetaHit	MTG	Healthy	frc	MH0177	0.424738
MetaHit	MTG	Healthy	frc	MH0178	0.0216199
MetaHit	MTG	Healthy	frc	MH0179	0.0330881
MetaHit	MTG	Healthy	frc	MH0181	0.430683
MetaHit	MTG	Healthy	frc	MH0182	1.67112
MetaHit	MTG	Healthy	frc	MH0183	0.196628
MetaHit	MTG	Healthy	frc	MH0184	0.0692802
MetaHit	MTG	Healthy	frc	MH0185	0.10483
MetaHit	MTG	Healthy	frc	MH0186	0.071306
MetaHit	MTG	Healthy	frc	MH0187	1.02901
MetaHit	MTG	Healthy	frc	MH0188	0.139316
MetaHit	MTG	Healthy	frc	MH0189	0.470698
MetaHit	MTG	Healthy	frc	MH0191	0.877184
MetaHit	MTG	Healthy	frc	MH0193	0.12585
MetaHit	MTG	Healthy	frc	MH0195	0.00651056
MetaHit	MTG	Healthy	frc	MH0196	0.699181
MetaHit	MTG	Healthy	frc	MH0197	0.382043
MetaHit	MTG	Healthy	frc	MH0198	6.38726
MetaHit	MTG	Healthy	frc	MH0199	0.841549
MetaHit	MTG	Healthy	frc	MH0203	0.257558
MetaHit	MTG	Healthy	frc	MH0204	4.70756
MetaHit	MTG	Healthy	frc	MH0205	0.244083
MetaHit	MTG	Healthy	frc	MH0206	4.88026
MetaHit	MTG	Healthy	frc	MH0212	0.0653744
MetaHit	MTG	Healthy	frc	MH0217	0.393173
MetaHit	MTG	Healthy	frc	MH0220	0.188856
MetaHit	MTG	Healthy	frc	MH0224	0.239654
MetaHit	MTG	Healthy	frc	MH0227	0.361622
MetaHit	MTG	Healthy	frc	MH0229	0.481353
MetaHit	MTG	Healthy	frc	MH0230	1.29814
MetaHit	MTG	Healthy	frc	MH0233	0.0419961
MetaHit	MTG	Healthy	frc	MH0236	0.0525972
MetaHit	MTG	Healthy	frc	MH0239	0.0355657
MetaHit	MTG	Healthy	frc	MH0243	0.0765739
MetaHit	MTG	Healthy	frc	MH0244	0.28938
MetaHit	MTG	Healthy	frc	MH0247	0.453709
MetaHit	MTG	Healthy	frc	MH0250	0.61572
MetaHit	MTG	Healthy	frc	MH0251	0.0294418
MetaHit	MTG	Healthy	frc	MH0253	0.424153
MetaHit	MTG	Healthy	frc	MH0257	5.85957
MetaHit	MTG	Healthy	frc	MH0272	0.779222
MetaHit	MTG	Healthy	frc	MH0274	0.593953
MetaHit	MTG	Healthy	frc	MH0275	0.326655
MetaHit	MTG	Healthy	frc	MH0276	0.166764
MetaHit	MTG	Healthy	frc	MH0277	71.6841
MetaHit	MTG	Healthy	frc	MH0286	0.31713
MetaHit	MTG	Healthy	frc	MH0287	0.179254
MetaHit	MTG	Healthy	frc	MH0288	0.156655
MetaHit	MTG	Healthy	frc	MH0289	0.0109261
MetaHit	MTG	Healthy	frc	MH0292	0.0630559
MetaHit	MTG	Healthy	frc	MH0302	0.141705
MetaHit	MTG	Healthy	frc	MH0305	0.0157985
MetaHit	MTG	Healthy	frc	MH0307	0.0402119
MetaHit	MTG	Healthy	frc	MH0316	0.216356
MetaHit	MTG	Healthy	frc	MH0318	2.27374
MetaHit	MTG	Healthy	frc	MH0321	0.415216
MetaHit	MTG	Healthy	frc	MH0322	0.638233
MetaHit	MTG	Healthy	frc	MH0333	0.00697977
MetaHit	MTG	Healthy	frc	MH0403	1.16204
MetaHit	MTG	Healthy	frc	MH0404	0.0417102
MetaHit	MTG	Healthy	frc	MH0405	0.0062457
MetaHit	MTG	Healthy	frc	MH0407	0.162867
MetaHit	MTG	Healthy	frc	MH0408	0.788861
MetaHit	MTG	Healthy	frc	MH0409	0.107884
MetaHit	MTG	Healthy	frc	MH0410	1.72512
MetaHit	MTG	Healthy	frc	MH0411	0.304793
MetaHit	MTG	Healthy	frc	MH0412	0.353579
MetaHit	MTG	Healthy	frc	MH0413	0.852686
MetaHit	MTG	Healthy	frc	MH0415	3.24537
MetaHit	MTG	Healthy	frc	MH0416	0.313094
MetaHit	MTG	Healthy	frc	MH0417	0.736297
MetaHit	MTG	Healthy	frc	MH0418	0.177189
MetaHit	MTG	Healthy	frc	MH0419	0.213934
MetaHit	MTG	Healthy	frc	MH0421	0.858446
MetaHit	MTG	Healthy	frc	MH0422	1.20715
MetaHit	MTG	Healthy	frc	MH0423	0.0130795
MetaHit	MTG	Healthy	frc	MH0424	1.09677
MetaHit	MTG	Healthy	frc	MH0425	0.0185726
MetaHit	MTG	Healthy	frc	MH0426	0.970745
MetaHit	MTG	Healthy	frc	MH0427	9.23508
MetaHit	MTG	Healthy	frc	MH0428	0.529818
MetaHit	MTG	Healthy	frc	MH0429	0.527414
MetaHit	MTG	Healthy	frc	MH0430	0.335346
MetaHit	MTG	Healthy	frc	MH0431	1.57651
MetaHit	MTG	Healthy	frc	MH0432	0.0601372
MetaHit	MTG	Healthy	frc	MH0433	0.777968
MetaHit	MTG	Healthy	frc	MH0434	0.937879
MetaHit	MTG	Healthy	frc	MH0435	0.131629
MetaHit	MTG	Healthy	frc	MH0436	0.153844
MetaHit	MTG	Healthy	frc	MH0437	2.08258
MetaHit	MTG	Healthy	frc	MH0438	0.225624
MetaHit	MTG	Healthy	frc	MH0439	0.556124
MetaHit	MTG	Healthy	frc	MH0440	1.90967
MetaHit	MTG	Healthy	frc	MH0441	0.0536931
MetaHit	MTG	Healthy	frc	MH0442	0.259218
MetaHit	MTG	Healthy	frc	MH0443	0.0365172
MetaHit	MTG	Healthy	frc	MH0444	0.842847
MetaHit	MTG	Healthy	frc	MH0445	0.418493
MetaHit	MTG	Healthy	frc	MH0446	0.169657
MetaHit	MTG	Healthy	frc	MH0447	0.219288
MetaHit	MTG	Healthy	frc	MH0448	0.927133
MetaHit	MTG	Healthy	frc	MH0450	0.548432
MetaHit	MTG	Healthy	frc	MH0452	1.03591
MetaHit	MTG	Healthy	frc	MH0453	0.0124613
MetaHit	MTG	Healthy	frc	MH0454	0.561975
MetaHit	MTG	Healthy	frc	MH0455	0.0109351
MetaHit	MTG	Healthy	frc	MH0456	4.41053
MetaHit	MTG	Healthy	frc	MH0457	0.50483
MetaHit	MTG	Healthy	frc	MH0458	0.949413
MetaHit	MTG	Healthy	frc	MH0462	0.14976
MetaHit	MTG	Healthy	oxc	MH0002	0.268319
MetaHit	MTG	Healthy	oxc	MH0003	0.127434
MetaHit	MTG	Healthy	oxc	MH0009	0.147312
MetaHit	MTG	Healthy	oxc	MH0011	0.557009
MetaHit	MTG	Healthy	oxc	MH0012	0.398887
MetaHit	MTG	Healthy	oxc	MH0014	13.6221
MetaHit	MTG	Healthy	oxc	MH0016	0.0152588
MetaHit	MTG	Healthy	oxc	MH0021	0.0336281
MetaHit	MTG	Healthy	oxc	MH0025	2.86316
MetaHit	MTG	Healthy	oxc	MH0032	0.0771014
MetaHit	MTG	Healthy	oxc	MH0033	0.385286
MetaHit	MTG	Healthy	oxc	MH0037	0.255817
MetaHit	MTG	Healthy	oxc	MH0038	1.87753
MetaHit	MTG	Healthy	oxc	MH0041	0.233597
MetaHit	MTG	Healthy	oxc	MH0042	0.226825
MetaHit	MTG	Healthy	oxc	MH0047	0.120919
MetaHit	MTG	Healthy	oxc	MH0048	0.0640292
MetaHit	MTG	Healthy	oxc	MH0052	0.262309
MetaHit	MTG	Healthy	oxc	MH0054	0.448589
MetaHit	MTG	Healthy	oxc	MH0056	0.426366
MetaHit	MTG	Healthy	oxc	MH0058	0.476915
MetaHit	MTG	Healthy	oxc	MH0059	0.160667
MetaHit	MTG	Healthy	oxc	MH0060	0.128441
MetaHit	MTG	Healthy	oxc	MH0061	0.130415
MetaHit	MTG	Healthy	oxc	MH0062	0.257137
MetaHit	MTG	Healthy	oxc	MH0065	0.0420504
MetaHit	MTG	Healthy	oxc	MH0068	0.0467309
MetaHit	MTG	Healthy	oxc	MH0069	0.151302
MetaHit	MTG	Healthy	oxc	MH0070	0.46546
MetaHit	MTG	Healthy	oxc	MH0071	0.161726
MetaHit	MTG	Healthy	oxc	MH0074	0.137829
MetaHit	MTG	Healthy	oxc	MH0075	0.144614
MetaHit	MTG	Healthy	oxc	MH0076	0.0449451
MetaHit	MTG	Healthy	oxc	MH0077	1.00974
MetaHit	MTG	Healthy	oxc	MH0078	0.0218474
MetaHit	MTG	Healthy	oxc	MH0079	0.920784
MetaHit	MTG	Healthy	oxc	MH0081	0.304749
MetaHit	MTG	Healthy	oxc	MH0082	0.299445
MetaHit	MTG	Healthy	oxc	MH0083	0.432965
MetaHit	MTG	Healthy	oxc	MH0086	1.06444
MetaHit	MTG	Healthy	oxc	MH0087	0.150669
MetaHit	MTG	Healthy	oxc	MH0088	0.0188504
MetaHit	MTG	Healthy	oxc	MH0089	0.179392
MetaHit	MTG	Healthy	oxc	MH0090	0.301129
MetaHit	MTG	Healthy	oxc	MH0091	0.00744348
MetaHit	MTG	Healthy	oxc	MH0092	0.0776379
MetaHit	MTG	Healthy	oxc	MH0093	16.2765
MetaHit	MTG	Healthy	oxc	MH0095	3.11886
MetaHit	MTG	Healthy	oxc	MH0096	0.119594
MetaHit	MTG	Healthy	oxc	MH0097	5.54375
MetaHit	MTG	Healthy	oxc	MH0098	0.0470019
MetaHit	MTG	Healthy	oxc	MH0099	0.393874
MetaHit	MTG	Healthy	oxc	MH0100	0.907718
MetaHit	MTG	Healthy	oxc	MH0101	0.899333
MetaHit	MTG	Healthy	oxc	MH0102	0.107274
MetaHit	MTG	Healthy	oxc	MH0103	0.0150747
MetaHit	MTG	Healthy	oxc	MH0104	0.219061
MetaHit	MTG	Healthy	oxc	MH0105	0.239013
MetaHit	MTG	Healthy	oxc	MH0106	0.460344
MetaHit	MTG	Healthy	oxc	MH0107	0.300331
MetaHit	MTG	Healthy	oxc	MH0110	0.560986
MetaHit	MTG	Healthy	oxc	MH0111	0.0937054
MetaHit	MTG	Healthy	oxc	MH0113	0.492511
MetaHit	MTG	Healthy	oxc	MH0115	0.389059
MetaHit	MTG	Healthy	oxc	MH0116	1.72172
MetaHit	MTG	Healthy	oxc	MH0117	0.587986
MetaHit	MTG	Healthy	oxc	MH0118	0.088517
MetaHit	MTG	Healthy	oxc	MH0119	0.0956271
MetaHit	MTG	Healthy	oxc	MH0120	0.0794955
MetaHit	MTG	Healthy	oxc	MH0121	6.43988
MetaHit	MTG	Healthy	oxc	MH0122	0.0428916
MetaHit	MTG	Healthy	oxc	MH0123	0.486732
MetaHit	MTG	Healthy	oxc	MH0124	1.68269
MetaHit	MTG	Healthy	oxc	MH0125	0.159816
MetaHit	MTG	Healthy	oxc	MH0126	0.0555656
MetaHit	MTG	Healthy	oxc	MH0127	0.0814981
MetaHit	MTG	Healthy	oxc	MH0128	0.080454
MetaHit	MTG	Healthy	oxc	MH0129	1.33454
MetaHit	MTG	Healthy	oxc	MH0130	0.165086
MetaHit	MTG	Healthy	oxc	MH0131	0.0288217
MetaHit	MTG	Healthy	oxc	MH0132	0.0732663
MetaHit	MTG	Healthy	oxc	MH0134	0.314471
MetaHit	MTG	Healthy	oxc	MH0135	0.946046
MetaHit	MTG	Healthy	oxc	MH0138	0.0039705
MetaHit	MTG	Healthy	oxc	MH0139	0.00247477
MetaHit	MTG	Healthy	oxc	MH0140	0.329224
MetaHit	MTG	Healthy	oxc	MH0141	0.229208
MetaHit	MTG	Healthy	oxc	MH0142	0.548859
MetaHit	MTG	Healthy	oxc	MH0143	0.291762
MetaHit	MTG	Healthy	oxc	MH0144	0.344641
MetaHit	MTG	Healthy	oxc	MH0145	0.630877
MetaHit	MTG	Healthy	oxc	MH0146	0.030183
MetaHit	MTG	Healthy	oxc	MH0147	0.0660412
MetaHit	MTG	Healthy	oxc	MH0149	0.193798
MetaHit	MTG	Healthy	oxc	MH0150	0.442131
MetaHit	MTG	Healthy	oxc	MH0152	0.0190668
MetaHit	MTG	Healthy	oxc	MH0153	0.153752
MetaHit	MTG	Healthy	oxc	MH0154	0.370086
MetaHit	MTG	Healthy	oxc	MH0155	0.018662
MetaHit	MTG	Healthy	oxc	MH0156	0.030014
MetaHit	MTG	Healthy	oxc	MH0157	0.100505
MetaHit	MTG	Healthy	oxc	MH0158	0.245191
MetaHit	MTG	Healthy	oxc	MH0159	2.46152
MetaHit	MTG	Healthy	oxc	MH0160	0.159373
MetaHit	MTG	Healthy	oxc	MH0161	0.0129629
MetaHit	MTG	Healthy	oxc	MH0163	1.04387
MetaHit	MTG	Healthy	oxc	MH0164	0.00978961
MetaHit	MTG	Healthy	oxc	MH0166	0.033356
MetaHit	MTG	Healthy	oxc	MH0168	0.813636
MetaHit	MTG	Healthy	oxc	MH0170	0.0739809
MetaHit	MTG	Healthy	oxc	MH0173	0.0424192
MetaHit	MTG	Healthy	oxc	MH0174	0.196136
MetaHit	MTG	Healthy	oxc	MH0176	0.0281947
MetaHit	MTG	Healthy	oxc	MH0177	0.158969
MetaHit	MTG	Healthy	oxc	MH0178	0.00821775
MetaHit	MTG	Healthy	oxc	MH0179	0.0083786
MetaHit	MTG	Healthy	oxc	MH0181	0.147244
MetaHit	MTG	Healthy	oxc	MH0182	0.802119
MetaHit	MTG	Healthy	oxc	MH0183	0.0576739
MetaHit	MTG	Healthy	oxc	MH0184	0.147809
MetaHit	MTG	Healthy	oxc	MH0185	0.0374849
MetaHit	MTG	Healthy	oxc	MH0187	0.565473
MetaHit	MTG	Healthy	oxc	MH0188	0.132493
MetaHit	MTG	Healthy	oxc	MH0189	0.273201
MetaHit	MTG	Healthy	oxc	MH0191	0.526193
MetaHit	MTG	Healthy	oxc	MH0193	0.0200304
MetaHit	MTG	Healthy	oxc	MH0196	0.145314
MetaHit	MTG	Healthy	oxc	MH0197	0.18632
MetaHit	MTG	Healthy	oxc	MH0198	1.73994
MetaHit	MTG	Healthy	oxc	MH0199	0.105593
MetaHit	MTG	Healthy	oxc	MH0200	0.0063345
MetaHit	MTG	Healthy	oxc	MH0203	0.128835
MetaHit	MTG	Healthy	oxc	MH0204	0.0269467
MetaHit	MTG	Healthy	oxc	MH0205	0.0912146
MetaHit	MTG	Healthy	oxc	MH0206	2.42661
MetaHit	MTG	Healthy	oxc	MH0212	0.0222376
MetaHit	MTG	Healthy	oxc	MH0217	0.244032
MetaHit	MTG	Healthy	oxc	MH0220	0.114768
MetaHit	MTG	Healthy	oxc	MH0224	0.146079
MetaHit	MTG	Healthy	oxc	MH0227	0.201172
MetaHit	MTG	Healthy	oxc	MH0229	0.271133
MetaHit	MTG	Healthy	oxc	MH0230	0.76764
MetaHit	MTG	Healthy	oxc	MH0233	0.0514222
MetaHit	MTG	Healthy	oxc	MH0236	0.0196764
MetaHit	MTG	Healthy	oxc	MH0243	0.0415342
MetaHit	MTG	Healthy	oxc	MH0244	0.190952
MetaHit	MTG	Healthy	oxc	MH0247	0.0542983
MetaHit	MTG	Healthy	oxc	MH0250	0.245219
MetaHit	MTG	Healthy	oxc	MH0251	0.022696
MetaHit	MTG	Healthy	oxc	MH0253	0.138949
MetaHit	MTG	Healthy	oxc	MH0257	5.22188
MetaHit	MTG	Healthy	oxc	MH0272	0.494445
MetaHit	MTG	Healthy	oxc	MH0274	0.301913
MetaHit	MTG	Healthy	oxc	MH0275	0.193175
MetaHit	MTG	Healthy	oxc	MH0276	0.0414967
MetaHit	MTG	Healthy	oxc	MH0277	59.435
MetaHit	MTG	Healthy	oxc	MH0286	0.203516
MetaHit	MTG	Healthy	oxc	MH0287	0.0332406
MetaHit	MTG	Healthy	oxc	MH0288	0.01002
MetaHit	MTG	Healthy	oxc	MH0289	0.0157239
MetaHit	MTG	Healthy	oxc	MH0292	0.0411645
MetaHit	MTG	Healthy	oxc	MH0302	0.256639
MetaHit	MTG	Healthy	oxc	MH0305	0.00582638
MetaHit	MTG	Healthy	oxc	MH0316	0.185207
MetaHit	MTG	Healthy	oxc	MH0318	2.1462
MetaHit	MTG	Healthy	oxc	MH0321	0.138969
MetaHit	MTG	Healthy	oxc	MH0322	0.395683
MetaHit	MTG	Healthy	oxc	MH0333	0.0102964
MetaHit	MTG	Healthy	oxc	MH0403	0.494327
MetaHit	MTG	Healthy	oxc	MH0404	0.0159533
MetaHit	MTG	Healthy	oxc	MH0407	0.0521864
MetaHit	MTG	Healthy	oxc	MH0408	0.548463
MetaHit	MTG	Healthy	oxc	MH0409	0.0361948
MetaHit	MTG	Healthy	oxc	MH0410	1.31165
MetaHit	MTG	Healthy	oxc	MH0411	0.0896553
MetaHit	MTG	Healthy	oxc	MH0412	0.325683
MetaHit	MTG	Healthy	oxc	MH0413	0.450473
MetaHit	MTG	Healthy	oxc	MH0415	1.18603
MetaHit	MTG	Healthy	oxc	MH0416	0.131194
MetaHit	MTG	Healthy	oxc	MH0417	0.247415
MetaHit	MTG	Healthy	oxc	MH0418	0.0913611
MetaHit	MTG	Healthy	oxc	MH0419	0.123543
MetaHit	MTG	Healthy	oxc	MH0420	0.0153491
MetaHit	MTG	Healthy	oxc	MH0421	0.592328
MetaHit	MTG	Healthy	oxc	MH0422	1.27592
MetaHit	MTG	Healthy	oxc	MH0423	0.0206494
MetaHit	MTG	Healthy	oxc	MH0424	0.575952
MetaHit	MTG	Healthy	oxc	MH0425	0.00913265
MetaHit	MTG	Healthy	oxc	MH0426	0.505445
MetaHit	MTG	Healthy	oxc	MH0427	6.63407
MetaHit	MTG	Healthy	oxc	MH0428	0.224575
MetaHit	MTG	Healthy	oxc	MH0429	0.32671
MetaHit	MTG	Healthy	oxc	MH0430	0.100075
MetaHit	MTG	Healthy	oxc	MH0431	0.590194
MetaHit	MTG	Healthy	oxc	MH0432	0.0449355
MetaHit	MTG	Healthy	oxc	MH0433	0.673125
MetaHit	MTG	Healthy	oxc	MH0434	0.567082
MetaHit	MTG	Healthy	oxc	MH0435	0.0613302
MetaHit	MTG	Healthy	oxc	MH0436	0.0828991
MetaHit	MTG	Healthy	oxc	MH0437	1.15245
MetaHit	MTG	Healthy	oxc	MH0438	0.175886
MetaHit	MTG	Healthy	oxc	MH0439	0.434139
MetaHit	MTG	Healthy	oxc	MH0440	1.15025
MetaHit	MTG	Healthy	oxc	MH0441	0.0185453
MetaHit	MTG	Healthy	oxc	MH0442	0.0918292
MetaHit	MTG	Healthy	oxc	MH0443	0.0272334
MetaHit	MTG	Healthy	oxc	MH0444	0.936509
MetaHit	MTG	Healthy	oxc	MH0445	0.205486
MetaHit	MTG	Healthy	oxc	MH0446	0.0503368
MetaHit	MTG	Healthy	oxc	MH0447	0.111348
MetaHit	MTG	Healthy	oxc	MH0448	0.627847
MetaHit	MTG	Healthy	oxc	MH0450	0.288991
MetaHit	MTG	Healthy	oxc	MH0452	0.823559
MetaHit	MTG	Healthy	oxc	MH0453	0.00950765
MetaHit	MTG	Healthy	oxc	MH0454	0.133849
MetaHit	MTG	Healthy	oxc	MH0455	0.00424507
MetaHit	MTG	Healthy	oxc	MH0456	2.07759
MetaHit	MTG	Healthy	oxc	MH0457	0.2548
MetaHit	MTG	Healthy	oxc	MH0458	0.834267
MetaHit	MTG	Healthy	oxc	MH0462	0.0431179
US_men_extra	MTG	Healthy	oxdd	10057608	0.181455
US_men_extra	MTG	Healthy	oxdd	10540312	0.132577
US_men_extra	MTG	Healthy	oxdd	10585880	0.204763
US_men_extra	MTG	Healthy	oxdd	10626339	0.114716
US_men_extra	MTG	Healthy	oxdd	10807867	0.112729
US_men_extra	MTG	Healthy	oxdd	11275441	0.087405
US_men_extra	MTG	Healthy	oxdd	11486372	0.0703674
US_men_extra	MTG	Healthy	oxdd	11576479	0.0446994
US_men_extra	MTG	Healthy	oxdd	11715866	0.0946327
US_men_extra	MTG	Healthy	oxdd	11837804	0.0805907
US_men_extra	MTG	Healthy	oxdd	11919084	0.0390056
US_men_extra	MTG	Healthy	oxdd	11949935	0.0629968
US_men_extra	MTG	Healthy	oxdd	11971292	0.0798487
US_men_extra	MTG	Healthy	oxdd	12214819	0.0453901
US_men_extra	MTG	Healthy	oxdd	12293355	0.124948
US_men_extra	MTG	Healthy	oxdd	12294978	0.0653033
US_men_extra	MTG	Healthy	oxdd	12430629	0.127898
US_men_extra	MTG	Healthy	oxdd	12656695	0.131318
US_men_extra	MTG	Healthy	oxdd	12780703	0.0653061
US_men_extra	MTG	Healthy	oxdd	13530241	0.149371
US_men_extra	MTG	Healthy	oxdd	13551775	0.126683
US_men_extra	MTG	Healthy	oxdd	13572279	0.0958968
US_men_extra	MTG	Healthy	oxdd	13980738	0.165435
US_men_extra	MTG	Healthy	oxdd	14315964	0.040574
US_men_extra	MTG	Healthy	oxdd	14590405	0.0759978
US_men_extra	MTG	Healthy	oxdd	15066469	0.0714226
US_men_extra	MTG	Healthy	oxdd	15074981	1.28519
US_men_extra	MTG	Healthy	oxdd	15721911	0.104513
US_men_extra	MTG	Healthy	oxdd	15892873	0.0939907
US_men_extra	MTG	Healthy	oxdd	16240769	0.159005
US_men_extra	MTG	Healthy	oxdd	16577761	0.0363314
US_men_extra	MTG	Healthy	oxdd	17259943	0.213164
US_men_extra	MTG	Healthy	oxdd	17353203	0.0386209
US_men_extra	MTG	Healthy	oxdd	17671755	0.112769
US_men_extra	MTG	Healthy	oxdd	17675569	0.0605544
US_men_extra	MTG	Healthy	oxdd	17841344	0.450297
US_men_extra	MTG	Healthy	oxdd	18346018	0.0801462
US_men_extra	MTG	Healthy	oxdd	18746474	0.0524129
US_men_extra	MTG	Healthy	oxdd	18754574	0.19151
US_men_extra	MTG	Healthy	oxdd	19272639	0.0606095
US_men_extra	MTG	Healthy	oxdd	19401504	0.119767
US_men_extra	MTG	Healthy	oxdd	19745900	0.0303868
US_men_extra	MTG	Healthy	oxdd	19831054	0.0772119
US_men_extra	MTG	Healthy	oxdd	20037920	0.0623474
US_men_extra	MTG	Healthy	oxdd	20127924	0.0405313
US_men_extra	MTG	Healthy	oxdd	30095454	0.0420157
US_men_extra	MTG	Healthy	oxdd	30293054	0.187735
US_men_extra	MTG	Healthy	oxdd	30575913	0.116696
US_men_extra	MTG	Healthy	oxdd	30594510	0.275711
US_men_extra	MTG	Healthy	oxdd	30629079	0.162314
US_men_extra	MTG	Healthy	oxdd	30756617	0.0729075
US_men_extra	MTG	Healthy	oxdd	30960822	0.0289555
US_men_extra	MTG	Healthy	oxdd	40006207	0.288866
US_men_extra	MTG	Healthy	oxdd	40048760	0.0371894
US_men_extra	MTG	Healthy	oxdd	40053948	0.110994
US_men_extra	MTG	Healthy	oxdd	40179385	0.0695479
US_men_extra	MTG	Healthy	oxdd	40262354	0.0492767
US_men_extra	MTG	Healthy	oxdd	40406457	0.0478671
US_men_extra	MTG	Healthy	oxdd	40476924	0.153722
US_men_extra	MTG	Healthy	oxdd	40550164	0.295438
US_men_extra	MTG	Healthy	oxdd	40647106	0.0981716
US_men_extra	MTG	Healthy	oxdd	40741705	0.0702982
US_men_extra	MTG	Healthy	oxdd	40913201	0.121104
US_men_extra	MTG	Healthy	oxdd	50241352	0.270273
US_men_extra	MTG	Healthy	oxdd	50279110	0.0759429
US_men_extra	MTG	Healthy	oxdd	50304865	0.0926604
US_men_extra	MTG	Healthy	oxdd	50466110	0.133736
US_men_extra	MTG	Healthy	oxdd	50745639	0.157499
US_men_extra	MTG	Healthy	oxdd	60200027	0.211962
US_men_extra	MTG	Healthy	oxdd	70005253	0.218062
US_men_extra	MTG	Healthy	oxdd	70312587	0.128393
US_men_extra	MTG	Healthy	oxdd	70488374	0.0977535
US_men_extra	MTG	Healthy	oxdd	70510290	0.170544
US_men_extra	MTG	Healthy	oxdd	70572554	0.0653827
US_men_extra	MTG	Healthy	oxdd	70608855	0.11331
US_men_extra	MTG	Healthy	oxdd	70802023	0.0775752
US_men_extra	MTG	Healthy	oxdd	70995736	0.11251
US_men_extra	MTG	Healthy	oxdd	71041789	0.0375201
US_men_extra	MTG	Healthy	oxdd	71191223	0.10385
US_men_extra	MTG	Healthy	oxdd	71382449	0.0501116
US_men_extra	MTG	Healthy	oxdd	71429144	0.0251066
US_men_extra	MTG	Healthy	oxdd	71448977	0.174065
US_men_extra	MTG	Healthy	oxdd	71474566	0.227399
US_men_extra	MTG	Healthy	oxdd	71645778	0.064684
US_men_extra	MTG	Healthy	oxdd	71869016	0.102259
US_men_extra	MTG	Healthy	oxdd	72111792	0.127683
US_men_extra	MTG	Healthy	oxdd	72233627	0.0936668
US_men_extra	MTG	Healthy	oxdd	72251940	0.0918313
US_men_extra	MTG	Healthy	frc	10042055	28.7699
US_men_extra	MTG	Healthy	frc	10057608	18.0809
US_men_extra	MTG	Healthy	frc	10230266	0.118827
US_men_extra	MTG	Healthy	frc	10240582	1.28238
US_men_extra	MTG	Healthy	frc	10285435	1.15506
US_men_extra	MTG	Healthy	frc	10304173	0.205457
US_men_extra	MTG	Healthy	frc	10306807	1.43279
US_men_extra	MTG	Healthy	frc	10342712	0.883611
US_men_extra	MTG	Healthy	frc	10391948	0.141635
US_men_extra	MTG	Healthy	frc	10502288	0.366289
US_men_extra	MTG	Healthy	frc	10540312	0.436116
US_men_extra	MTG	Healthy	frc	10549563	10.826
US_men_extra	MTG	Healthy	frc	10585880	30.6838
US_men_extra	MTG	Healthy	frc	10598702	0.724173
US_men_extra	MTG	Healthy	frc	10626339	0.700276
US_men_extra	MTG	Healthy	frc	10650433	0.342601
US_men_extra	MTG	Healthy	frc	10681665	0.523485
US_men_extra	MTG	Healthy	frc	10713431	4.99567
US_men_extra	MTG	Healthy	frc	10797719	37.5656
US_men_extra	MTG	Healthy	frc	10807867	8.71672
US_men_extra	MTG	Healthy	frc	11026074	3.77221
US_men_extra	MTG	Healthy	frc	11043800	1.55751
US_men_extra	MTG	Healthy	frc	11078743	0.374862
US_men_extra	MTG	Healthy	frc	11188967	10.3947
US_men_extra	MTG	Healthy	frc	11242817	0.0457045
US_men_extra	MTG	Healthy	frc	11275441	2.53812
US_men_extra	MTG	Healthy	frc	11287767	0.970089
US_men_extra	MTG	Healthy	frc	11294862	12.5618
US_men_extra	MTG	Healthy	frc	11418230	4.49517
US_men_extra	MTG	Healthy	frc	11486372	14.3577
US_men_extra	MTG	Healthy	frc	11507229	3.20295
US_men_extra	MTG	Healthy	frc	11526341	3.30471
US_men_extra	MTG	Healthy	frc	11576479	0.189977
US_men_extra	MTG	Healthy	frc	11608039	32.0253
US_men_extra	MTG	Healthy	frc	11765695	0.44176
US_men_extra	MTG	Healthy	frc	11837804	2.75241
US_men_extra	MTG	Healthy	frc	11919084	5.24334
US_men_extra	MTG	Healthy	frc	11949935	5.87661
US_men_extra	MTG	Healthy	frc	11971292	0.378802
US_men_extra	MTG	Healthy	frc	11992832	2.80176
US_men_extra	MTG	Healthy	frc	12016910	0.69382
US_men_extra	MTG	Healthy	frc	12085645	1.3046
US_men_extra	MTG	Healthy	frc	12214819	2.73799
US_men_extra	MTG	Healthy	frc	12289378	1.45985
US_men_extra	MTG	Healthy	frc	12293355	1.72574
US_men_extra	MTG	Healthy	frc	12294978	1.02143
US_men_extra	MTG	Healthy	frc	12383462	0.537101
US_men_extra	MTG	Healthy	frc	12516553	1.0874
US_men_extra	MTG	Healthy	frc	12542142	0.506156
US_men_extra	MTG	Healthy	frc	12678519	1.34087
US_men_extra	MTG	Healthy	frc	12780703	3.64457
US_men_extra	MTG	Healthy	frc	12815993	0.934829
US_men_extra	MTG	Healthy	frc	12956425	0.252924
US_men_extra	MTG	Healthy	frc	13092959	1.54005
US_men_extra	MTG	Healthy	frc	13098268	0.214621
US_men_extra	MTG	Healthy	frc	13111491	3.31727
US_men_extra	MTG	Healthy	frc	13241014	2.02662
US_men_extra	MTG	Healthy	frc	13448277	1.13666
US_men_extra	MTG	Healthy	frc	13530241	7.31947
US_men_extra	MTG	Healthy	frc	13551775	5.73365
US_men_extra	MTG	Healthy	frc	13572279	0.107538
US_men_extra	MTG	Healthy	frc	13750586	0.820699
US_men_extra	MTG	Healthy	frc	13787854	2.87905
US_men_extra	MTG	Healthy	frc	13948544	0.322732
US_men_extra	MTG	Healthy	frc	13980738	8.88453
US_men_extra	MTG	Healthy	frc	14040721	1.19553
US_men_extra	MTG	Healthy	frc	14056552	0.633902
US_men_extra	MTG	Healthy	frc	14093668	2.36721
US_men_extra	MTG	Healthy	frc	14143026	9.20775
US_men_extra	MTG	Healthy	frc	14175675	0.980637
US_men_extra	MTG	Healthy	frc	14315964	5.67973
US_men_extra	MTG	Healthy	frc	14390583	0.851682
US_men_extra	MTG	Healthy	frc	14494311	0.0266172
US_men_extra	MTG	Healthy	frc	14561280	11.4317
US_men_extra	MTG	Healthy	frc	14583928	0.0525363
US_men_extra	MTG	Healthy	frc	14590405	8.57382
US_men_extra	MTG	Healthy	frc	14804704	0.732256
US_men_extra	MTG	Healthy	frc	14835627	0.0779572
US_men_extra	MTG	Healthy	frc	14948866	0.156438
US_men_extra	MTG	Healthy	frc	15066469	0.134139
US_men_extra	MTG	Healthy	frc	15074981	13.2178
US_men_extra	MTG	Healthy	frc	15127457	0.476449
US_men_extra	MTG	Healthy	frc	15401240	3.3413
US_men_extra	MTG	Healthy	frc	15487950	6.27618
US_men_extra	MTG	Healthy	frc	15586956	0.634079
US_men_extra	MTG	Healthy	frc	15673945	1.07581
US_men_extra	MTG	Healthy	frc	15717213	17.2853
US_men_extra	MTG	Healthy	frc	15717522	1.77485
US_men_extra	MTG	Healthy	frc	15721911	0.0713861
US_men_extra	MTG	Healthy	frc	15752525	0.0832416
US_men_extra	MTG	Healthy	frc	15785561	0.135092
US_men_extra	MTG	Healthy	frc	15892873	26.4172
US_men_extra	MTG	Healthy	frc	16020939	1.6026
US_men_extra	MTG	Healthy	frc	16041443	1.13624
US_men_extra	MTG	Healthy	frc	16063055	0.327507
US_men_extra	MTG	Healthy	frc	16068286	0.285749
US_men_extra	MTG	Healthy	frc	16204040	0.360686
US_men_extra	MTG	Healthy	frc	16240769	2.65004
US_men_extra	MTG	Healthy	frc	16396439	2.06778
US_men_extra	MTG	Healthy	frc	16485541	0.0884828
US_men_extra	MTG	Healthy	frc	16545524	2.41282
US_men_extra	MTG	Healthy	frc	16577761	0.47664
US_men_extra	MTG	Healthy	frc	16662328	0.741394
US_men_extra	MTG	Healthy	frc	16846459	13.9489
US_men_extra	MTG	Healthy	frc	16863149	0.582384
US_men_extra	MTG	Healthy	frc	16913125	5.0062
US_men_extra	MTG	Healthy	frc	16935973	4.45065
US_men_extra	MTG	Healthy	frc	16969917	3.17428
US_men_extra	MTG	Healthy	frc	17090904	0.131816
US_men_extra	MTG	Healthy	frc	17101027	0.172166
US_men_extra	MTG	Healthy	frc	17143477	3.66629
US_men_extra	MTG	Healthy	frc	17259943	0.544454
US_men_extra	MTG	Healthy	frc	17353203	0.0349006
US_men_extra	MTG	Healthy	frc	17404802	3.00145
US_men_extra	MTG	Healthy	frc	17437941	0.602053
US_men_extra	MTG	Healthy	frc	17453111	0.793762
US_men_extra	MTG	Healthy	frc	17671755	0.418522
US_men_extra	MTG	Healthy	frc	17675569	3.80415
US_men_extra	MTG	Healthy	frc	17838578	39.4524
US_men_extra	MTG	Healthy	frc	17841344	0.202738
US_men_extra	MTG	Healthy	frc	17885707	0.265406
US_men_extra	MTG	Healthy	frc	17907460	87.1477
US_men_extra	MTG	Healthy	frc	17997838	0.29867
US_men_extra	MTG	Healthy	frc	18033060	2.83224
US_men_extra	MTG	Healthy	frc	18075722	10.3138
US_men_extra	MTG	Healthy	frc	18131061	2.0899
US_men_extra	MTG	Healthy	frc	18168329	6
US_men_extra	MTG	Healthy	frc	18184323	0.260457
US_men_extra	MTG	Healthy	frc	18293645	9.40338
US_men_extra	MTG	Healthy	frc	18346018	4.84664
US_men_extra	MTG	Healthy	frc	18425216	0.883931
US_men_extra	MTG	Healthy	frc	18445642	5.53776
US_men_extra	MTG	Healthy	frc	18552130	7.42636
US_men_extra	MTG	Healthy	frc	18628150	0.147889
US_men_extra	MTG	Healthy	frc	18706034	0.566371
US_men_extra	MTG	Healthy	frc	18746474	0.223634
US_men_extra	MTG	Healthy	frc	18747685	0.291185
US_men_extra	MTG	Healthy	frc	18754574	0.85247
US_men_extra	MTG	Healthy	frc	19061811	0.772179
US_men_extra	MTG	Healthy	frc	19113791	0.0786746
US_men_extra	MTG	Healthy	frc	19123701	0.489364
US_men_extra	MTG	Healthy	frc	19251414	4.8469
US_men_extra	MTG	Healthy	frc	19258449	1.54447
US_men_extra	MTG	Healthy	frc	19272639	0.831232
US_men_extra	MTG	Healthy	frc	19383868	0.707579
US_men_extra	MTG	Healthy	frc	19412825	1.66495
US_men_extra	MTG	Healthy	frc	19464870	0.254771
US_men_extra	MTG	Healthy	frc	19498608	6.71658
US_men_extra	MTG	Healthy	frc	19517140	0.665863
US_men_extra	MTG	Healthy	frc	19702233	2.88474
US_men_extra	MTG	Healthy	frc	19745900	2.87291
US_men_extra	MTG	Healthy	frc	19831054	5.67394
US_men_extra	MTG	Healthy	frc	19919818	3.78877
US_men_extra	MTG	Healthy	frc	19966838	0.863879
US_men_extra	MTG	Healthy	frc	20006270	0.109132
US_men_extra	MTG	Healthy	frc	20029305	0.188299
US_men_extra	MTG	Healthy	frc	20037920	0.435595
US_men_extra	MTG	Healthy	frc	20069333	0.209354
US_men_extra	MTG	Healthy	frc	20127924	33.3808
US_men_extra	MTG	Healthy	frc	20192639	1.26411
US_men_extra	MTG	Healthy	frc	20208617	0.954912
US_men_extra	MTG	Healthy	frc	20215088	1.40064
US_men_extra	MTG	Healthy	frc	20269046	1.17362
US_men_extra	MTG	Healthy	frc	30026822	1.34138
US_men_extra	MTG	Healthy	frc	30095454	0.0468057
US_men_extra	MTG	Healthy	frc	30144631	0.397322
US_men_extra	MTG	Healthy	frc	30201181	0.913782
US_men_extra	MTG	Healthy	frc	30293054	0.18455
US_men_extra	MTG	Healthy	frc	30374571	7.37941
US_men_extra	MTG	Healthy	frc	30399513	6.5861
US_men_extra	MTG	Healthy	frc	30538791	2.07293
US_men_extra	MTG	Healthy	frc	30575913	0.0885084
US_men_extra	MTG	Healthy	frc	30589734	1.39433
US_men_extra	MTG	Healthy	frc	30594510	0.656875
US_men_extra	MTG	Healthy	frc	30629079	2.62293
US_men_extra	MTG	Healthy	frc	30733891	1.26006
US_men_extra	MTG	Healthy	frc	30756617	0.375263
US_men_extra	MTG	Healthy	frc	30820571	2.89521
US_men_extra	MTG	Healthy	frc	30826086	3.72382
US_men_extra	MTG	Healthy	frc	30920067	0.345261
US_men_extra	MTG	Healthy	frc	30931909	1.72912
US_men_extra	MTG	Healthy	frc	30960822	0.72835
US_men_extra	MTG	Healthy	frc	30969970	0.26784
US_men_extra	MTG	Healthy	frc	30973226	0.224578
US_men_extra	MTG	Healthy	frc	40006207	0.407703
US_men_extra	MTG	Healthy	frc	40048760	1.19699
US_men_extra	MTG	Healthy	frc	40067975	3.36849
US_men_extra	MTG	Healthy	frc	40164662	22.7514
US_men_extra	MTG	Healthy	frc	40179385	0.89824
US_men_extra	MTG	Healthy	frc	40262354	1.52717
US_men_extra	MTG	Healthy	frc	40279396	0.0354743
US_men_extra	MTG	Healthy	frc	40322749	4.58912
US_men_extra	MTG	Healthy	frc	40344567	1.70724
US_men_extra	MTG	Healthy	frc	40382585	23.9498
US_men_extra	MTG	Healthy	frc	40406457	0.0764063
US_men_extra	MTG	Healthy	frc	40476924	41.8938
US_men_extra	MTG	Healthy	frc	40531258	0.994167
US_men_extra	MTG	Healthy	frc	40550164	1.34072
US_men_extra	MTG	Healthy	frc	40572400	1.03256
US_men_extra	MTG	Healthy	frc	40647106	0.15193
US_men_extra	MTG	Healthy	frc	40700151	1.50754
US_men_extra	MTG	Healthy	frc	40741705	2.76714
US_men_extra	MTG	Healthy	frc	40792230	0.0951654
US_men_extra	MTG	Healthy	frc	40913201	0.255937
US_men_extra	MTG	Healthy	frc	40930194	12.2689
US_men_extra	MTG	Healthy	frc	50176181	0.247554
US_men_extra	MTG	Healthy	frc	50211022	0.463655
US_men_extra	MTG	Healthy	frc	50241352	0.3373
US_men_extra	MTG	Healthy	frc	50253678	0.0898413
US_men_extra	MTG	Healthy	frc	50304865	10.5202
US_men_extra	MTG	Healthy	frc	50340152	1.13753
US_men_extra	MTG	Healthy	frc	50466110	32.1696
US_men_extra	MTG	Healthy	frc	50492523	1.76854
US_men_extra	MTG	Healthy	frc	50507078	1.40758
US_men_extra	MTG	Healthy	frc	50530888	3.20984
US_men_extra	MTG	Healthy	frc	50635518	0.0731673
US_men_extra	MTG	Healthy	frc	50682950	0.265911
US_men_extra	MTG	Healthy	frc	50694555	0.470354
US_men_extra	MTG	Healthy	frc	50708626	0.12501
US_men_extra	MTG	Healthy	frc	50724929	2.43231
US_men_extra	MTG	Healthy	frc	50745639	0.359561
US_men_extra	MTG	Healthy	frc	50747443	7.02741
US_men_extra	MTG	Healthy	frc	50850323	25.1789
US_men_extra	MTG	Healthy	frc	51006340	0.238282
US_men_extra	MTG	Healthy	frc	60097006	0.647927
US_men_extra	MTG	Healthy	frc	60101845	0.238863
US_men_extra	MTG	Healthy	frc	60148502	6.61482
US_men_extra	MTG	Healthy	frc	60187319	5.27953
US_men_extra	MTG	Healthy	frc	60200027	0.0933789
US_men_extra	MTG	Healthy	frc	60238506	1.5583
US_men_extra	MTG	Healthy	frc	60338620	0.369411
US_men_extra	MTG	Healthy	frc	60478041	1.07294
US_men_extra	MTG	Healthy	frc	60514917	0.426997
US_men_extra	MTG	Healthy	frc	70005253	0.230513
US_men_extra	MTG	Healthy	frc	70053072	1.43276
US_men_extra	MTG	Healthy	frc	70059005	2.92737
US_men_extra	MTG	Healthy	frc	70111148	0.987115
US_men_extra	MTG	Healthy	frc	70234503	15.16
US_men_extra	MTG	Healthy	frc	70312587	0.652434
US_men_extra	MTG	Healthy	frc	70324089	0.0865906
US_men_extra	MTG	Healthy	frc	70488374	17.9425
US_men_extra	MTG	Healthy	frc	70510290	0.751581
US_men_extra	MTG	Healthy	frc	70572554	2.70927
US_men_extra	MTG	Healthy	frc	70596794	0.27212
US_men_extra	MTG	Healthy	frc	70608855	0.874073
US_men_extra	MTG	Healthy	frc	70615435	5.82196
US_men_extra	MTG	Healthy	frc	70616749	0.0948694
US_men_extra	MTG	Healthy	frc	70636351	0.150399
US_men_extra	MTG	Healthy	frc	70802023	0.709592
US_men_extra	MTG	Healthy	frc	70838280	33.213
US_men_extra	MTG	Healthy	frc	70863791	1.47427
US_men_extra	MTG	Healthy	frc	70995736	9.87092
US_men_extra	MTG	Healthy	frc	71022162	0.132611
US_men_extra	MTG	Healthy	frc	71041789	0.263561
US_men_extra	MTG	Healthy	frc	71191223	0.430024
US_men_extra	MTG	Healthy	frc	71318945	15.8521
US_men_extra	MTG	Healthy	frc	71382449	0.0862719
US_men_extra	MTG	Healthy	frc	71429144	1.1495
US_men_extra	MTG	Healthy	frc	71448977	0.645619
US_men_extra	MTG	Healthy	frc	71474566	0.315366
US_men_extra	MTG	Healthy	frc	71492982	0.071396
US_men_extra	MTG	Healthy	frc	71634045	0.847049
US_men_extra	MTG	Healthy	frc	71645778	1.55342
US_men_extra	MTG	Healthy	frc	71705246	3.64465
US_men_extra	MTG	Healthy	frc	71755590	4.11414
US_men_extra	MTG	Healthy	frc	71869016	1.92921
US_men_extra	MTG	Healthy	frc	71894939	0.0511469
US_men_extra	MTG	Healthy	frc	71909603	3.49593
US_men_extra	MTG	Healthy	frc	71936712	1.03833
US_men_extra	MTG	Healthy	frc	72043921	1.22912
US_men_extra	MTG	Healthy	frc	72111792	1.28576
US_men_extra	MTG	Healthy	frc	72164642	1.05576
US_men_extra	MTG	Healthy	frc	72196364	11.9764
US_men_extra	MTG	Healthy	frc	72233627	0.532907
US_men_extra	MTG	Healthy	frc	72242320	6.08797
US_men_extra	MTG	Healthy	frc	72251940	0.0886353
US_men_extra	MTG	Healthy	oxc	10042055	28.3286
US_men_extra	MTG	Healthy	oxc	10057608	15.06
US_men_extra	MTG	Healthy	oxc	10083403	0.0640873
US_men_extra	MTG	Healthy	oxc	10230266	0.1975
US_men_extra	MTG	Healthy	oxc	10240582	0.426211
US_men_extra	MTG	Healthy	oxc	10285435	1.33375
US_men_extra	MTG	Healthy	oxc	10304173	0.133043
US_men_extra	MTG	Healthy	oxc	10306807	0.582785
US_men_extra	MTG	Healthy	oxc	10342712	0.086428
US_men_extra	MTG	Healthy	oxc	10391948	0.168854
US_men_extra	MTG	Healthy	oxc	10502288	0.293643
US_men_extra	MTG	Healthy	oxc	10540312	0.265531
US_men_extra	MTG	Healthy	oxc	10549563	2.16935
US_men_extra	MTG	Healthy	oxc	10585880	10.8481
US_men_extra	MTG	Healthy	oxc	10598702	0.229739
US_men_extra	MTG	Healthy	oxc	10626339	0.742125
US_men_extra	MTG	Healthy	oxc	10650433	0.275662
US_men_extra	MTG	Healthy	oxc	10681665	0.741801
US_men_extra	MTG	Healthy	oxc	10713431	2.53399
US_men_extra	MTG	Healthy	oxc	10797719	10.5638
US_men_extra	MTG	Healthy	oxc	10807867	5.03845
US_men_extra	MTG	Healthy	oxc	11026074	1.83832
US_men_extra	MTG	Healthy	oxc	11043800	0.305161
US_men_extra	MTG	Healthy	oxc	11188967	8.22409
US_men_extra	MTG	Healthy	oxc	11242817	0.0681149
US_men_extra	MTG	Healthy	oxc	11275441	2.43145
US_men_extra	MTG	Healthy	oxc	11287767	0.502178
US_men_extra	MTG	Healthy	oxc	11294862	6.84979
US_men_extra	MTG	Healthy	oxc	11418230	2.02324
US_men_extra	MTG	Healthy	oxc	11486372	11.2847
US_men_extra	MTG	Healthy	oxc	11507229	1.62357
US_men_extra	MTG	Healthy	oxc	11526341	1.48543
US_men_extra	MTG	Healthy	oxc	11576479	0.170464
US_men_extra	MTG	Healthy	oxc	11608039	32.8784
US_men_extra	MTG	Healthy	oxc	11765695	0.284434
US_men_extra	MTG	Healthy	oxc	11837804	1.25559
US_men_extra	MTG	Healthy	oxc	11919084	3.87345
US_men_extra	MTG	Healthy	oxc	11925792	0.0955833
US_men_extra	MTG	Healthy	oxc	11949935	5.13275
US_men_extra	MTG	Healthy	oxc	11971292	0.397646
US_men_extra	MTG	Healthy	oxc	11992832	1.99343
US_men_extra	MTG	Healthy	oxc	12016910	0.698663
US_men_extra	MTG	Healthy	oxc	12085645	0.962258
US_men_extra	MTG	Healthy	oxc	12214819	1.59696
US_men_extra	MTG	Healthy	oxc	12289378	0.988878
US_men_extra	MTG	Healthy	oxc	12293355	1.85332
US_men_extra	MTG	Healthy	oxc	12294978	1.19651
US_men_extra	MTG	Healthy	oxc	12383462	0.102177
US_men_extra	MTG	Healthy	oxc	12516553	0.779691
US_men_extra	MTG	Healthy	oxc	12542142	0.420604
US_men_extra	MTG	Healthy	oxc	12678519	0.112043
US_men_extra	MTG	Healthy	oxc	12780703	1.47645
US_men_extra	MTG	Healthy	oxc	12815993	0.78991
US_men_extra	MTG	Healthy	oxc	12956425	0.302738
US_men_extra	MTG	Healthy	oxc	13092959	0.682005
US_men_extra	MTG	Healthy	oxc	13098268	0.0534866
US_men_extra	MTG	Healthy	oxc	13111491	1.39659
US_men_extra	MTG	Healthy	oxc	13241014	1.17011
US_men_extra	MTG	Healthy	oxc	13448277	0.858589
US_men_extra	MTG	Healthy	oxc	13530241	4.31817
US_men_extra	MTG	Healthy	oxc	13551775	3.43173
US_men_extra	MTG	Healthy	oxc	13572279	0.129724
US_men_extra	MTG	Healthy	oxc	13750586	0.160713
US_men_extra	MTG	Healthy	oxc	13787854	1.90036
US_men_extra	MTG	Healthy	oxc	13948544	0.230657
US_men_extra	MTG	Healthy	oxc	13980738	8.57507
US_men_extra	MTG	Healthy	oxc	14040721	0.259596
US_men_extra	MTG	Healthy	oxc	14056552	0.151186
US_men_extra	MTG	Healthy	oxc	14093668	1.72912
US_men_extra	MTG	Healthy	oxc	14143026	6.19389
US_men_extra	MTG	Healthy	oxc	14175675	1.03455
US_men_extra	MTG	Healthy	oxc	14315964	5.44769
US_men_extra	MTG	Healthy	oxc	14390583	0.887094
US_men_extra	MTG	Healthy	oxc	14494311	0.0549567
US_men_extra	MTG	Healthy	oxc	14561280	10.2058
US_men_extra	MTG	Healthy	oxc	14583928	0.0634598
US_men_extra	MTG	Healthy	oxc	14590405	8.33808
US_men_extra	MTG	Healthy	oxc	14804704	0.210021
US_men_extra	MTG	Healthy	oxc	14948866	0.236147
US_men_extra	MTG	Healthy	oxc	15066469	0.102785
US_men_extra	MTG	Healthy	oxc	15074981	14.1704
US_men_extra	MTG	Healthy	oxc	15127457	0.213893
US_men_extra	MTG	Healthy	oxc	15401240	1.82051
US_men_extra	MTG	Healthy	oxc	15487950	3.35258
US_men_extra	MTG	Healthy	oxc	15586956	0.309982
US_men_extra	MTG	Healthy	oxc	15673945	0.153025
US_men_extra	MTG	Healthy	oxc	15717213	11.8149
US_men_extra	MTG	Healthy	oxc	15717522	1.8548
US_men_extra	MTG	Healthy	oxc	15785561	0.154483
US_men_extra	MTG	Healthy	oxc	15892873	21.2297
US_men_extra	MTG	Healthy	oxc	16020939	0.6609
US_men_extra	MTG	Healthy	oxc	16041443	0.596692
US_men_extra	MTG	Healthy	oxc	16063055	0.167914
US_men_extra	MTG	Healthy	oxc	16068286	0.0664438
US_men_extra	MTG	Healthy	oxc	16204040	0.671927
US_men_extra	MTG	Healthy	oxc	16240769	1.78628
US_men_extra	MTG	Healthy	oxc	16396439	3.10785
US_men_extra	MTG	Healthy	oxc	16485541	0.0624938
US_men_extra	MTG	Healthy	oxc	16545524	1.42565
US_men_extra	MTG	Healthy	oxc	16577761	0.177663
US_men_extra	MTG	Healthy	oxc	16662328	0.572859
US_men_extra	MTG	Healthy	oxc	16846459	12.7822
US_men_extra	MTG	Healthy	oxc	16863149	0.210002
US_men_extra	MTG	Healthy	oxc	16913125	2.12825
US_men_extra	MTG	Healthy	oxc	16935973	2.89729
US_men_extra	MTG	Healthy	oxc	16969917	2.10501
US_men_extra	MTG	Healthy	oxc	17086721	0.0892806
US_men_extra	MTG	Healthy	oxc	17101027	0.0642592
US_men_extra	MTG	Healthy	oxc	17143477	4.01144
US_men_extra	MTG	Healthy	oxc	17259943	0.678785
US_men_extra	MTG	Healthy	oxc	17353203	0.0956781
US_men_extra	MTG	Healthy	oxc	17404802	2.66558
US_men_extra	MTG	Healthy	oxc	17437941	0.697193
US_men_extra	MTG	Healthy	oxc	17453111	0.505871
US_men_extra	MTG	Healthy	oxc	17671755	0.15893
US_men_extra	MTG	Healthy	oxc	17675569	3.08094
US_men_extra	MTG	Healthy	oxc	17838578	38.2313
US_men_extra	MTG	Healthy	oxc	17841344	0.296388
US_men_extra	MTG	Healthy	oxc	17885707	0.0955095
US_men_extra	MTG	Healthy	oxc	17907460	81.4625
US_men_extra	MTG	Healthy	oxc	17997838	0.557714
US_men_extra	MTG	Healthy	oxc	18033060	3.46531
US_men_extra	MTG	Healthy	oxc	18075722	5.4768
US_men_extra	MTG	Healthy	oxc	18131061	1.50057
US_men_extra	MTG	Healthy	oxc	18168329	6.23258
US_men_extra	MTG	Healthy	oxc	18184323	0.138407
US_men_extra	MTG	Healthy	oxc	18197551	0.101099
US_men_extra	MTG	Healthy	oxc	18293645	7.08999
US_men_extra	MTG	Healthy	oxc	18346018	4.46647
US_men_extra	MTG	Healthy	oxc	18425216	0.556394
US_men_extra	MTG	Healthy	oxc	18445642	4.62857
US_men_extra	MTG	Healthy	oxc	18552130	8.80342
US_men_extra	MTG	Healthy	oxc	18706034	0.317485
US_men_extra	MTG	Healthy	oxc	18746474	0.280915
US_men_extra	MTG	Healthy	oxc	18747685	0.453084
US_men_extra	MTG	Healthy	oxc	18754574	0.329041
US_men_extra	MTG	Healthy	oxc	18817057	0.329162
US_men_extra	MTG	Healthy	oxc	19061811	0.365202
US_men_extra	MTG	Healthy	oxc	19113791	0.118287
US_men_extra	MTG	Healthy	oxc	19123701	0.191266
US_men_extra	MTG	Healthy	oxc	19145210	0.180989
US_men_extra	MTG	Healthy	oxc	19251414	3.39004
US_men_extra	MTG	Healthy	oxc	19258449	1.15376
US_men_extra	MTG	Healthy	oxc	19272639	0.689549
US_men_extra	MTG	Healthy	oxc	19383868	0.388921
US_men_extra	MTG	Healthy	oxc	19401504	0.0836672
US_men_extra	MTG	Healthy	oxc	19412825	0.736084
US_men_extra	MTG	Healthy	oxc	19464870	0.0316579
US_men_extra	MTG	Healthy	oxc	19498608	2.95449
US_men_extra	MTG	Healthy	oxc	19517140	0.638695
US_men_extra	MTG	Healthy	oxc	19702233	3.10171
US_men_extra	MTG	Healthy	oxc	19745900	2.69953
US_men_extra	MTG	Healthy	oxc	19831054	4.25876
US_men_extra	MTG	Healthy	oxc	19919818	1.82592
US_men_extra	MTG	Healthy	oxc	19966838	0.514215
US_men_extra	MTG	Healthy	oxc	20029305	0.262403
US_men_extra	MTG	Healthy	oxc	20037920	0.478601
US_men_extra	MTG	Healthy	oxc	20069333	0.0777405
US_men_extra	MTG	Healthy	oxc	20127924	16.42
US_men_extra	MTG	Healthy	oxc	20192124	0.069546
US_men_extra	MTG	Healthy	oxc	20192639	0.993807
US_men_extra	MTG	Healthy	oxc	20208617	0.123918
US_men_extra	MTG	Healthy	oxc	20215088	0.502352
US_men_extra	MTG	Healthy	oxc	20269046	0.526169
US_men_extra	MTG	Healthy	oxc	30026822	0.56979
US_men_extra	MTG	Healthy	oxc	30144631	0.228838
US_men_extra	MTG	Healthy	oxc	30201181	0.773752
US_men_extra	MTG	Healthy	oxc	30374571	6.21137
US_men_extra	MTG	Healthy	oxc	30399513	5.87661
US_men_extra	MTG	Healthy	oxc	30538791	1.4117
US_men_extra	MTG	Healthy	oxc	30589734	1.39285
US_men_extra	MTG	Healthy	oxc	30594510	0.36804
US_men_extra	MTG	Healthy	oxc	30629079	2.34357
US_men_extra	MTG	Healthy	oxc	30733891	0.969778
US_men_extra	MTG	Healthy	oxc	30756617	0.570275
US_men_extra	MTG	Healthy	oxc	30820571	2.58431
US_men_extra	MTG	Healthy	oxc	30826086	1.88096
US_men_extra	MTG	Healthy	oxc	30920067	0.0785504
US_men_extra	MTG	Healthy	oxc	30931909	0.479836
US_men_extra	MTG	Healthy	oxc	30960822	0.316208
US_men_extra	MTG	Healthy	oxc	30969970	0.199623
US_men_extra	MTG	Healthy	oxc	30973226	0.147288
US_men_extra	MTG	Healthy	oxc	40006207	0.258061
US_men_extra	MTG	Healthy	oxc	40048760	0.96579
US_men_extra	MTG	Healthy	oxc	40067975	2.58328
US_men_extra	MTG	Healthy	oxc	40164662	19.9608
US_men_extra	MTG	Healthy	oxc	40179385	0.336795
US_men_extra	MTG	Healthy	oxc	40262354	1.30213
US_men_extra	MTG	Healthy	oxc	40279396	0.0318049
US_men_extra	MTG	Healthy	oxc	40322749	4.60288
US_men_extra	MTG	Healthy	oxc	40344567	1.24839
US_men_extra	MTG	Healthy	oxc	40382585	12.505
US_men_extra	MTG	Healthy	oxc	40406457	0.111895
US_men_extra	MTG	Healthy	oxc	40476924	15.793
US_men_extra	MTG	Healthy	oxc	40531258	1.12923
US_men_extra	MTG	Healthy	oxc	40550164	1.10368
US_men_extra	MTG	Healthy	oxc	40572400	0.721892
US_men_extra	MTG	Healthy	oxc	40647106	0.122275
US_men_extra	MTG	Healthy	oxc	40700151	0.45012
US_men_extra	MTG	Healthy	oxc	40741705	0.966784
US_men_extra	MTG	Healthy	oxc	40908322	0.100812
US_men_extra	MTG	Healthy	oxc	40913201	0.350931
US_men_extra	MTG	Healthy	oxc	40930194	9.79947
US_men_extra	MTG	Healthy	oxc	50211022	0.292794
US_men_extra	MTG	Healthy	oxc	50241352	0.23649
US_men_extra	MTG	Healthy	oxc	50304865	7.57992
US_men_extra	MTG	Healthy	oxc	50340152	0.90338
US_men_extra	MTG	Healthy	oxc	50466110	18.8817
US_men_extra	MTG	Healthy	oxc	50492523	1.29647
US_men_extra	MTG	Healthy	oxc	50507078	0.521268
US_men_extra	MTG	Healthy	oxc	50530888	1.89506
US_men_extra	MTG	Healthy	oxc	50635518	0.22065
US_men_extra	MTG	Healthy	oxc	50682950	0.183399
US_men_extra	MTG	Healthy	oxc	50694555	0.0761375
US_men_extra	MTG	Healthy	oxc	50724929	1.73411
US_men_extra	MTG	Healthy	oxc	50745639	0.133792
US_men_extra	MTG	Healthy	oxc	50747443	4.87443
US_men_extra	MTG	Healthy	oxc	50850323	22.5539
US_men_extra	MTG	Healthy	oxc	51006340	0.216086
US_men_extra	MTG	Healthy	oxc	60097006	0.33776
US_men_extra	MTG	Healthy	oxc	60101845	0.214785
US_men_extra	MTG	Healthy	oxc	60148502	4.4246
US_men_extra	MTG	Healthy	oxc	60187319	4.03646
US_men_extra	MTG	Healthy	oxc	60200027	0.106091
US_men_extra	MTG	Healthy	oxc	60238506	0.768691
US_men_extra	MTG	Healthy	oxc	60338620	0.352785
US_men_extra	MTG	Healthy	oxc	60478041	0.788715
US_men_extra	MTG	Healthy	oxc	60514917	0.41952
US_men_extra	MTG	Healthy	oxc	70005253	0.0768907
US_men_extra	MTG	Healthy	oxc	70053072	1.33062
US_men_extra	MTG	Healthy	oxc	70059005	2.28111
US_men_extra	MTG	Healthy	oxc	70111148	1.19372
US_men_extra	MTG	Healthy	oxc	70234503	14.6534
US_men_extra	MTG	Healthy	oxc	70312587	0.709462
US_men_extra	MTG	Healthy	oxc	70324089	0.0844167
US_men_extra	MTG	Healthy	oxc	70488374	17.4364
US_men_extra	MTG	Healthy	oxc	70510290	0.154213
US_men_extra	MTG	Healthy	oxc	70572554	1.42232
US_men_extra	MTG	Healthy	oxc	70596794	0.519041
US_men_extra	MTG	Healthy	oxc	70608855	0.353422
US_men_extra	MTG	Healthy	oxc	70615435	5.71539
US_men_extra	MTG	Healthy	oxc	70616749	0.26951
US_men_extra	MTG	Healthy	oxc	70636351	0.174222
US_men_extra	MTG	Healthy	oxc	70802023	0.270441
US_men_extra	MTG	Healthy	oxc	70838280	20.3952
US_men_extra	MTG	Healthy	oxc	70863791	0.934349
US_men_extra	MTG	Healthy	oxc	70995736	4.13844
US_men_extra	MTG	Healthy	oxc	71022162	0.269933
US_men_extra	MTG	Healthy	oxc	71041789	0.0800659
US_men_extra	MTG	Healthy	oxc	71191223	0.629682
US_men_extra	MTG	Healthy	oxc	71318945	13.5107
US_men_extra	MTG	Healthy	oxc	71429144	0.636609
US_men_extra	MTG	Healthy	oxc	71448977	0.1827
US_men_extra	MTG	Healthy	oxc	71474566	0.213058
US_men_extra	MTG	Healthy	oxc	71492982	0.103869
US_men_extra	MTG	Healthy	oxc	71634045	0.303769
US_men_extra	MTG	Healthy	oxc	71645778	1.37841
US_men_extra	MTG	Healthy	oxc	71705246	2.30313
US_men_extra	MTG	Healthy	oxc	71755590	3.57257
US_men_extra	MTG	Healthy	oxc	71869016	1.24511
US_men_extra	MTG	Healthy	oxc	71894939	0.0873653
US_men_extra	MTG	Healthy	oxc	71909603	0.17548
US_men_extra	MTG	Healthy	oxc	71936712	0.900048
US_men_extra	MTG	Healthy	oxc	72043921	0.423925
US_men_extra	MTG	Healthy	oxc	72111792	0.742824
US_men_extra	MTG	Healthy	oxc	72164642	0.478634
US_men_extra	MTG	Healthy	oxc	72196364	8.03538
US_men_extra	MTG	Healthy	oxc	72233627	0.299216
US_men_extra	MTG	Healthy	oxc	72242320	4.30385
US_men_extra	MTG	Healthy	oxc	72251940	0.097345
US_men_extra	MTS	Healthy	oxdd	10057608	0.0946123
US_men_extra	MTS	Healthy	frc	10042055	29.887
US_men_extra	MTS	Healthy	frc	10598702	10.5181
US_men_extra	MTS	Healthy	frc	10650433	12.9057
US_men_extra	MTS	Healthy	frc	11188967	1.71486
US_men_extra	MTS	Healthy	frc	11275441	0.132764
US_men_extra	MTS	Healthy	frc	11287767	3.31304
US_men_extra	MTS	Healthy	frc	11418230	10.388
US_men_extra	MTS	Healthy	frc	11486372	0.104623
US_men_extra	MTS	Healthy	frc	11507229	2.91612
US_men_extra	MTS	Healthy	frc	11919084	54.7261
US_men_extra	MTS	Healthy	frc	11992832	8.72413
US_men_extra	MTS	Healthy	frc	12294978	1.68631
US_men_extra	MTS	Healthy	frc	12656695	5.58779
US_men_extra	MTS	Healthy	frc	12780703	3.06158
US_men_extra	MTS	Healthy	frc	13092959	4.172
US_men_extra	MTS	Healthy	frc	13111491	7.62146
US_men_extra	MTS	Healthy	frc	13241014	5.07974
US_men_extra	MTS	Healthy	frc	13530241	0.686575
US_men_extra	MTS	Healthy	frc	14040721	5.49623
US_men_extra	MTS	Healthy	frc	14390583	2.04833
US_men_extra	MTS	Healthy	frc	14952019	1.54882
US_men_extra	MTS	Healthy	frc	15487950	7.39632
US_men_extra	MTS	Healthy	frc	16863149	14.9986
US_men_extra	MTS	Healthy	frc	16913125	9.46478
US_men_extra	MTS	Healthy	frc	16935973	3.16079
US_men_extra	MTS	Healthy	frc	17086721	3.00448
US_men_extra	MTS	Healthy	frc	17437941	114.668
US_men_extra	MTS	Healthy	frc	17675569	0.160207
US_men_extra	MTS	Healthy	frc	18075722	3.13859
US_men_extra	MTS	Healthy	frc	18346018	3.62542
US_men_extra	MTS	Healthy	frc	18628150	2.86337
US_men_extra	MTS	Healthy	frc	18706034	4.99676
US_men_extra	MTS	Healthy	frc	19061811	5.15214
US_men_extra	MTS	Healthy	frc	19123701	3.28412
US_men_extra	MTS	Healthy	frc	19272639	2.64569
US_men_extra	MTS	Healthy	frc	19498608	4.38673
US_men_extra	MTS	Healthy	frc	19702233	3.69958
US_men_extra	MTS	Healthy	frc	19745900	0.241499
US_men_extra	MTS	Healthy	frc	19919818	5.35053
US_men_extra	MTS	Healthy	frc	20037920	17.2542
US_men_extra	MTS	Healthy	frc	20069333	0.0422038
US_men_extra	MTS	Healthy	frc	20192639	2.02837
US_men_extra	MTS	Healthy	frc	30538791	2.37986
US_men_extra	MTS	Healthy	frc	30733891	2.52485
US_men_extra	MTS	Healthy	frc	30826086	5.94326
US_men_extra	MTS	Healthy	frc	40006207	7.53011
US_men_extra	MTS	Healthy	frc	40179385	0.368738
US_men_extra	MTS	Healthy	frc	40262354	1.5344
US_men_extra	MTS	Healthy	frc	40322749	13.9586
US_men_extra	MTS	Healthy	frc	40531258	21.1544
US_men_extra	MTS	Healthy	frc	40550164	3.99679
US_men_extra	MTS	Healthy	frc	40741705	1.49479
US_men_extra	MTS	Healthy	frc	50144974	15.907
US_men_extra	MTS	Healthy	frc	50466110	14.3698
US_men_extra	MTS	Healthy	frc	50492523	5.817
US_men_extra	MTS	Healthy	frc	50635518	1.13723
US_men_extra	MTS	Healthy	frc	50682950	0.817839
US_men_extra	MTS	Healthy	frc	60148502	0.197697
US_men_extra	MTS	Healthy	frc	60238506	2.52428
US_men_extra	MTS	Healthy	frc	60338620	0.824033
US_men_extra	MTS	Healthy	frc	70053072	3.29428
US_men_extra	MTS	Healthy	frc	70059005	0.959009
US_men_extra	MTS	Healthy	frc	70312587	1.80846
US_men_extra	MTS	Healthy	frc	70572554	5.54506
US_men_extra	MTS	Healthy	frc	70636351	0.132057
US_men_extra	MTS	Healthy	frc	70995736	0.263819
US_men_extra	MTS	Healthy	frc	71429144	4.87359
US_men_extra	MTS	Healthy	frc	71492982	6.19642
US_men_extra	MTS	Healthy	frc	71705246	0.251581
US_men_extra	MTS	Healthy	frc	71936712	0.351348
US_men_extra	MTS	Healthy	frc	72111792	4.66716
US_men_extra	MTS	Healthy	frc	72164642	8.69656
US_men_extra	MTS	Healthy	oxc	10042055	13.5522
US_men_extra	MTS	Healthy	oxc	10057608	0.134561
US_men_extra	MTS	Healthy	oxc	10598702	13.5112
US_men_extra	MTS	Healthy	oxc	10650433	6.27004
US_men_extra	MTS	Healthy	oxc	11188967	2.60101
US_men_extra	MTS	Healthy	oxc	11287767	2.3096
US_men_extra	MTS	Healthy	oxc	11418230	8.8885
US_men_extra	MTS	Healthy	oxc	11486372	0.121996
US_men_extra	MTS	Healthy	oxc	11507229	1.27525
US_men_extra	MTS	Healthy	oxc	11992832	9.22117
US_men_extra	MTS	Healthy	oxc	12294978	1.35952
US_men_extra	MTS	Healthy	oxc	12542142	0.0262078
US_men_extra	MTS	Healthy	oxc	12656695	6.08493
US_men_extra	MTS	Healthy	oxc	13092959	1.34644
US_men_extra	MTS	Healthy	oxc	13111491	1.77504
US_men_extra	MTS	Healthy	oxc	13241014	5.24161
US_men_extra	MTS	Healthy	oxc	13530241	1.31418
US_men_extra	MTS	Healthy	oxc	14040721	6.36626
US_men_extra	MTS	Healthy	oxc	14390583	1.95037
US_men_extra	MTS	Healthy	oxc	15487950	4.42528
US_men_extra	MTS	Healthy	oxc	16485541	2.58679
US_men_extra	MTS	Healthy	oxc	16863149	5.31789
US_men_extra	MTS	Healthy	oxc	16913125	9.37939
US_men_extra	MTS	Healthy	oxc	16935973	1.89451
US_men_extra	MTS	Healthy	oxc	17086721	2.94064
US_men_extra	MTS	Healthy	oxc	17437941	70.5091
US_men_extra	MTS	Healthy	oxc	17675569	4.18659
US_men_extra	MTS	Healthy	oxc	18075722	1.20558
US_men_extra	MTS	Healthy	oxc	18346018	1.4127
US_men_extra	MTS	Healthy	oxc	18628150	2.16323
US_men_extra	MTS	Healthy	oxc	18706034	5.311
US_men_extra	MTS	Healthy	oxc	19061811	3.47619
US_men_extra	MTS	Healthy	oxc	19123701	0.509528
US_men_extra	MTS	Healthy	oxc	19272639	2.85029
US_men_extra	MTS	Healthy	oxc	19498608	3.57156
US_men_extra	MTS	Healthy	oxc	19702233	4.39468
US_men_extra	MTS	Healthy	oxc	19745900	6.8884
US_men_extra	MTS	Healthy	oxc	19919818	6.33333
US_men_extra	MTS	Healthy	oxc	20037920	6.30316
US_men_extra	MTS	Healthy	oxc	20069333	0.0252034
US_men_extra	MTS	Healthy	oxc	20192639	0.636629
US_men_extra	MTS	Healthy	oxc	30293054	0.258703
US_men_extra	MTS	Healthy	oxc	30538791	2.20854
US_men_extra	MTS	Healthy	oxc	30733891	2.09875
US_men_extra	MTS	Healthy	oxc	30826086	2.53302
US_men_extra	MTS	Healthy	oxc	40006207	6.22836
US_men_extra	MTS	Healthy	oxc	40179385	1.12302
US_men_extra	MTS	Healthy	oxc	40262354	3.04094
US_men_extra	MTS	Healthy	oxc	40322749	4.62323
US_men_extra	MTS	Healthy	oxc	40531258	12.7112
US_men_extra	MTS	Healthy	oxc	40550164	1.3715
US_men_extra	MTS	Healthy	oxc	40741705	1.25852
US_men_extra	MTS	Healthy	oxc	50466110	4.26273
US_men_extra	MTS	Healthy	oxc	50492523	3.0095
US_men_extra	MTS	Healthy	oxc	50635518	0.812587
US_men_extra	MTS	Healthy	oxc	60148502	0.247537
US_men_extra	MTS	Healthy	oxc	60238506	0.483914
US_men_extra	MTS	Healthy	oxc	70053072	1.42922
US_men_extra	MTS	Healthy	oxc	70059005	0.554246
US_men_extra	MTS	Healthy	oxc	70312587	0.699198
US_men_extra	MTS	Healthy	oxc	70572554	4.04299
US_men_extra	MTS	Healthy	oxc	70636351	0.140326
US_men_extra	MTS	Healthy	oxc	71382449	0.0230048
US_men_extra	MTS	Healthy	oxc	71429144	0.869365
US_men_extra	MTS	Healthy	oxc	71492982	9.34225
US_men_extra	MTS	Healthy	oxc	71705246	1.05818
US_men_extra	MTS	Healthy	oxc	71936712	1.03806
US_men_extra	MTS	Healthy	oxc	72111792	4.116
US_men_extra	MTS	Healthy	oxc	72164642	8.42698
