# Supplementary material for: Microbial genetic and transcriptional contributions to oxalate degradation by the gut microbiota in health and disease
Source: eLife. 2021 Mar 26;10:e63642. doi: 10.7554/eLife.63642 (PMC8062136; doi:10.7554/eLife.63642)
Supplement: Figure 3—source data 1. [file elife-63642-fig3-data1.xlsx]

## Sheet: Sheet1
Study	Assay	enzyme	uniprotID	Phylum	Class	Order	Family	Genus	Species	subject	Phenotype	RPKM
AMP	MTS	oxdd	A0A0E2EPN7	Firmicutes	Bacilli	Lactobacillales	Streptococcaceae	Streptococcus	Streptococcus mutans SM6	Commencal	Healthy	0.0609465
AMP	MTS	oxdd	A0A0E2EPN7	Firmicutes	Bacilli	Lactobacillales	Streptococcaceae	Streptococcus	Streptococcus mutans SM6	Giant	Healthy	0.0720467
AMP	MTS	oxdd	A0A0E2EPN7	Firmicutes	Bacilli	Lactobacillales	Streptococcaceae	Streptococcus	Streptococcus mutans SM6	Knolly	Healthy	0.159792
AMP	MTS	oxdd	A0A0E2EPN7	Firmicutes	Bacilli	Lactobacillales	Streptococcaceae	Streptococcus	Streptococcus mutans SM6	Merlin	Healthy	0.16662
AMP	MTG	oxdd	A0A0E2EPN7	Firmicutes	Bacilli	Lactobacillales	Streptococcaceae	Streptococcus	Streptococcus mutans SM6	Thomson	Healthy	0.0345434
AMP	MTS	oxdd	A0A0E2EPN7	Firmicutes	Bacilli	Lactobacillales	Streptococcaceae	Streptococcus	Streptococcus mutans SM6	Yeti	Healthy	0.0173686
fran	MTG	oxdd	A0A0E2EPN7	Firmicutes	Bacilli	Lactobacillales	Streptococcaceae	Streptococcus	Streptococcus mutans SM6	X310763260	Healthy	0.0394671
fran	MTS	oxdd	A0A0E2EPN7	Firmicutes	Bacilli	Lactobacillales	Streptococcaceae	Streptococcus	Streptococcus mutans SM6	X310763260	Healthy	0.0889062
fran	MTS	oxdd	A0A084YYH3	Proteobacteria	Gammaproteobacteria	Enterobacterales	Yersiniaceae	Serratia	Serratia grimesii	X317802115	Healthy	0.084878
fran	MTS	oxdd	A0A0J5LM70	Proteobacteria	Gammaproteobacteria	Enterobacterales	Enterobacteriaceae	Pluralibacter	Pluralibacter gergoviae	X317822438	Healthy	0.0804969
fran	MTG	oxdd	A0A134DGG3	Actinobacteria	Actinobacteria	Micrococcales	Microbacteriaceae	Microbacterium	Microbacterium hominis	X319146421	Healthy	0.0355113
fran	MTG	oxdd	A0A2R9UH50	Actinobacteria	Actinobacteria	Micrococcales	Microbacteriaceae	Microbacterium	Microbacterium sp. 71-36	X319146421	Healthy	0.0357769
fran	MTS	oxdd	A0A0N1NYM3	Ascomycota	Eurotiomycetes	Chaetothyriales	Herpotrichiellaceae	Phialophora	Phialophora attae	X319146421	Healthy	0.0788417
fran	MTS	oxdd	A0A177CPP9	Ascomycota	Dothideomycetes	Pleosporales	Didymosphaeriaceae	Paraphaeosphaeria	Paraphaeosphaeria sporulosa	X319146421	Healthy	0.0792282
HMP2	MTG	oxdd	A0A0E2EPN7	Firmicutes	Bacilli	Lactobacillales	Streptococcaceae	Streptococcus	Streptococcus mutans SM6	C4008	Healthy	0.150094
HMP2	MTG	oxdd	A0A0E2EPN7	Firmicutes	Bacilli	Lactobacillales	Streptococcaceae	Streptococcus	Streptococcus mutans SM6	H4008	Healthy	0.0480659
HMP2	MTG	oxdd	A0A1M7BDS5	Firmicutes	Clostridia	Clostridiales	Lachnospiraceae	Anaerocolumna	Anaerocolumna jejuensis DSM 15929	M2041	Healthy	0.032336
HMP2	MTG	oxdd	A0A1M7BDS5	Firmicutes	Clostridia	Clostridiales	Lachnospiraceae	Anaerocolumna	Anaerocolumna jejuensis DSM 15929	M2042	Healthy	0.0218619
HMP2	MTG	oxdd	A0A0E2EPN7	Firmicutes	Bacilli	Lactobacillales	Streptococcaceae	Streptococcus	Streptococcus mutans SM6	M2048	Healthy	0.0244495
HMP2	MTG	oxdd	A0A1M7BDS5	Firmicutes	Clostridia	Clostridiales	Lachnospiraceae	Anaerocolumna	Anaerocolumna jejuensis DSM 15929	M2048	Healthy	0.0513971
HMP2	MTG	oxdd	A0A1M7BDS5	Firmicutes	Clostridia	Clostridiales	Lachnospiraceae	Anaerocolumna	Anaerocolumna jejuensis DSM 15929	M2061	Healthy	0.029708
HMP2	MTG	oxdd	A0A0G4PDW8	Ascomycota	Eurotiomycetes	Eurotiales	Aspergillaceae	Penicillium	Penicillium camemberti FM 013	M2072	Healthy	0.0361065
HMP2	MTG	oxdd	A0A2W5R7U5	Proteobacteria	Alphaproteobacteria	Rhizobiales	Xanthobacteraceae	Starkeya	Starkeya novella	M2075	Healthy	0.0444321
MetaHit	MTG	oxdd	A0A0E2EPN7	Firmicutes	Bacilli	Lactobacillales	Streptococcaceae	Streptococcus	Streptococcus mutans SM6	MH0067	Healthy	0.0368031
MetaHit	MTG	oxdd	A0A0A2JSC1	Ascomycota	Eurotiomycetes	Eurotiales	Aspergillaceae	Penicillium	Penicillium expansum	MH0068	Healthy	0.0426477
MetaHit	MTG	oxdd	A0A0E2EPN7	Firmicutes	Bacilli	Lactobacillales	Streptococcaceae	Streptococcus	Streptococcus mutans SM6	MH0086	Healthy	0.0223061
MetaHit	MTG	oxdd	A0A1M7BDS5	Firmicutes	Clostridia	Clostridiales	Lachnospiraceae	Anaerocolumna	Anaerocolumna jejuensis DSM 15929	MH0101	Healthy	0.097616
MetaHit	MTG	oxdd	A0A1M7BDS5	Firmicutes	Clostridia	Clostridiales	Lachnospiraceae	Anaerocolumna	Anaerocolumna jejuensis DSM 15929	MH0102	Healthy	0.0192815
MetaHit	MTG	oxdd	A0A0E2EPN7	Firmicutes	Bacilli	Lactobacillales	Streptococcaceae	Streptococcus	Streptococcus mutans SM6	MH0104	Healthy	0.0501462
MetaHit	MTG	oxdd	A0A1M7BDS5	Firmicutes	Clostridia	Clostridiales	Lachnospiraceae	Anaerocolumna	Anaerocolumna jejuensis DSM 15929	MH0116	Healthy	0.0835746
MetaHit	MTG	oxdd	A0A1M7BDS5	Firmicutes	Clostridia	Clostridiales	Lachnospiraceae	Anaerocolumna	Anaerocolumna jejuensis DSM 15929	MH0118	Healthy	0.023547
MetaHit	MTG	oxdd	A0A1M7BDS5	Firmicutes	Clostridia	Clostridiales	Lachnospiraceae	Anaerocolumna	Anaerocolumna jejuensis DSM 15929	MH0148	Healthy	0.0791749
MetaHit	MTG	oxdd	A0A0E2EPN7	Firmicutes	Bacilli	Lactobacillales	Streptococcaceae	Streptococcus	Streptococcus mutans SM6	MH0152	Healthy	0.0268096
MetaHit	MTG	oxdd	A0A1M7BDS5	Firmicutes	Clostridia	Clostridiales	Lachnospiraceae	Anaerocolumna	Anaerocolumna jejuensis DSM 15929	MH0153	Healthy	0.013969
MetaHit	MTG	oxdd	A0A0E2EPN7	Firmicutes	Bacilli	Lactobacillales	Streptococcaceae	Streptococcus	Streptococcus mutans SM6	MH0159	Healthy	0.0155867
MetaHit	MTG	oxdd	A0A1M7BDS5	Firmicutes	Clostridia	Clostridiales	Lachnospiraceae	Anaerocolumna	Anaerocolumna jejuensis DSM 15929	MH0159	Healthy	0.0295248
MetaHit	MTG	oxdd	A0A1M7BDS5	Firmicutes	Clostridia	Clostridiales	Lachnospiraceae	Anaerocolumna	Anaerocolumna jejuensis DSM 15929	MH0169	Healthy	0.0113349
MetaHit	MTG	oxdd	A0A1M7BDS5	Firmicutes	Clostridia	Clostridiales	Lachnospiraceae	Anaerocolumna	Anaerocolumna jejuensis DSM 15929	MH0181	Healthy	0.00912152
MetaHit	MTG	oxdd	A0A1M7BDS5	Firmicutes	Clostridia	Clostridiales	Lachnospiraceae	Anaerocolumna	Anaerocolumna jejuensis DSM 15929	MH0184	Healthy	0.0719733
MetaHit	MTG	oxdd	A0A0E2EPN7	Firmicutes	Bacilli	Lactobacillales	Streptococcaceae	Streptococcus	Streptococcus mutans SM6	MH0203	Healthy	0.00690523
MetaHit	MTG	oxdd	A0A1M7BDS5	Firmicutes	Clostridia	Clostridiales	Lachnospiraceae	Anaerocolumna	Anaerocolumna jejuensis DSM 15929	MH0220	Healthy	0.0212066
MetaHit	MTG	oxdd	A0A0A2JTT7	Ascomycota	Eurotiomycetes	Eurotiales	Aspergillaceae	Penicillium	Penicillium expansum	MH0239	Healthy	0.0104046
MetaHit	MTG	oxdd	A0A1M7BDS5	Firmicutes	Clostridia	Clostridiales	Lachnospiraceae	Anaerocolumna	Anaerocolumna jejuensis DSM 15929	MH0250	Healthy	0.0107749
MetaHit	MTG	oxdd	A0A1M7BDS5	Firmicutes	Clostridia	Clostridiales	Lachnospiraceae	Anaerocolumna	Anaerocolumna jejuensis DSM 15929	MH0257	Healthy	0.0068928
MetaHit	MTG	oxdd	A0A0G4PE86	Ascomycota	Eurotiomycetes	Eurotiales	Aspergillaceae	Penicillium	Penicillium camemberti FM 013	MH0275	Healthy	0.00480005
MetaHit	MTG	oxdd	A0A135LSW3	Ascomycota	Eurotiomycetes	Eurotiales	Aspergillaceae	Penicillium	Penicillium griseofulvum	MH0275	Healthy	0.00307155
MetaHit	MTG	oxdd	W6Q8Y4	Ascomycota	Eurotiomycetes	Eurotiales	Aspergillaceae	Penicillium	Penicillium roqueforti FM164	MH0275	Healthy	0.0051107
MetaHit	MTG	oxdd	A0A1M7BDS5	Firmicutes	Clostridia	Clostridiales	Lachnospiraceae	Anaerocolumna	Anaerocolumna jejuensis DSM 15929	MH0286	Healthy	0.00816623
MetaHit	MTG	oxdd	A0A0E2EPN7	Firmicutes	Bacilli	Lactobacillales	Streptococcaceae	Streptococcus	Streptococcus mutans SM6	MH0287	Healthy	0.0213018
MetaHit	MTG	oxdd	A0A1M7BDS5	Firmicutes	Clostridia	Clostridiales	Lachnospiraceae	Anaerocolumna	Anaerocolumna jejuensis DSM 15929	MH0288	Healthy	0.00697679
MetaHit	MTG	oxdd	A0A0R2LFN3	Firmicutes	Bacilli	Lactobacillales	Lactobacillaceae	Lactobacillus	Lactobacillus kimchiensis	MH0305	Healthy	0.00801483
MetaHit	MTG	oxdd	A0A2K9HJP8	Firmicutes	Bacilli	Lactobacillales	Lactobacillaceae	Lactobacillus	Lactobacillus alimentarius DSM 20249	MH0305	Healthy	0.00801483
MetaHit	MTG	oxdd	A0A1M7BDS5	Firmicutes	Clostridia	Clostridiales	Lachnospiraceae	Anaerocolumna	Anaerocolumna jejuensis DSM 15929	MH0313	Healthy	0.00773433
MetaHit	MTG	oxdd	A0A1M7BDS5	Firmicutes	Clostridia	Clostridiales	Lachnospiraceae	Anaerocolumna	Anaerocolumna jejuensis DSM 15929	MH0316	Healthy	0.00646064
MetaHit	MTG	oxdd	A0A1M7BDS5	Firmicutes	Clostridia	Clostridiales	Lachnospiraceae	Anaerocolumna	Anaerocolumna jejuensis DSM 15929	MH0408	Healthy	0.00602347
MetaHit	MTG	oxdd	A0A1M7BDS5	Firmicutes	Clostridia	Clostridiales	Lachnospiraceae	Anaerocolumna	Anaerocolumna jejuensis DSM 15929	MH0416	Healthy	0.00668411
MetaHit	MTG	oxdd	A0A1M7BDS5	Firmicutes	Clostridia	Clostridiales	Lachnospiraceae	Anaerocolumna	Anaerocolumna jejuensis DSM 15929	MH0417	Healthy	0.00623806
MetaHit	MTG	oxdd	A0A1M7BDS5	Firmicutes	Clostridia	Clostridiales	Lachnospiraceae	Anaerocolumna	Anaerocolumna jejuensis DSM 15929	MH0418	Healthy	0.00694069
MetaHit	MTG	oxdd	A0A1M7BDS5	Firmicutes	Clostridia	Clostridiales	Lachnospiraceae	Anaerocolumna	Anaerocolumna jejuensis DSM 15929	MH0424	Healthy	0.0073081
MetaHit	MTG	oxdd	A0A1M7BDS5	Firmicutes	Clostridia	Clostridiales	Lachnospiraceae	Anaerocolumna	Anaerocolumna jejuensis DSM 15929	MH0429	Healthy	0.00879666
MetaHit	MTG	oxdd	A0A1M7BDS5	Firmicutes	Clostridia	Clostridiales	Lachnospiraceae	Anaerocolumna	Anaerocolumna jejuensis DSM 15929	MH0433	Healthy	0.0207495
MetaHit	MTG	oxdd	A0A0J5JWP1	Firmicutes	Bacilli	Bacillales	Bacillaceae	Bacillus	Bacillus sp. LL01	MH0440	Healthy	0.00626794
MetaHit	MTG	oxdd	A0A1M7BDS5	Firmicutes	Clostridia	Clostridiales	Lachnospiraceae	Anaerocolumna	Anaerocolumna jejuensis DSM 15929	MH0440	Healthy	0.00598166
MetaHit	MTG	oxdd	A0A0E2EPN7	Firmicutes	Bacilli	Lactobacillales	Streptococcaceae	Streptococcus	Streptococcus mutans SM6	MH0445	Healthy	0.0210186
MetaHit	MTG	oxdd	A0A2J9QCX5	Firmicutes	Bacilli	Lactobacillales	Streptococcaceae	Streptococcus	Streptococcus mutans	MH0445	Healthy	0.00700621
MetaHit	MTG	oxdd	A0A1M7BDS5	Firmicutes	Clostridia	Clostridiales	Lachnospiraceae	Anaerocolumna	Anaerocolumna jejuensis DSM 15929	MH0448	Healthy	0.00644301
MetaHit	MTG	oxdd	A0A1M7BDS5	Firmicutes	Clostridia	Clostridiales	Lachnospiraceae	Anaerocolumna	Anaerocolumna jejuensis DSM 15929	MH0454	Healthy	0.0065433
MetaHit	MTG	oxdd	A0A0E2EPN7	Firmicutes	Bacilli	Lactobacillales	Streptococcaceae	Streptococcus	Streptococcus mutans SM6	MH0457	Healthy	0.0128697
MetaHit	MTG	oxdd	A0A1M7BDS5	Firmicutes	Clostridia	Clostridiales	Lachnospiraceae	Anaerocolumna	Anaerocolumna jejuensis DSM 15929	MH0457	Healthy	0.00609454
MetaHit	MTG	oxdd	A0A0A2JTT7	Ascomycota	Eurotiomycetes	Eurotiales	Aspergillaceae	Penicillium	Penicillium expansum	MH0462	Healthy	0.00471352
MetaHit	MTG	oxdd	A0A0A2LHD9	Ascomycota	Eurotiomycetes	Eurotiales	Aspergillaceae	Penicillium	Penicillium italicum	MH0462	Healthy	0.00984234
MetaHit	MTG	oxdd	A0A101M8Z0	Ascomycota	Eurotiomycetes	Eurotiales	Aspergillaceae	Penicillium	Penicillium freii	MH0462	Healthy	0.00482551
MetaHit	MTG	oxdd	W6Q8Y4	Ascomycota	Eurotiomycetes	Eurotiales	Aspergillaceae	Penicillium	Penicillium roqueforti FM164	MH0462	Healthy	0.013993
MetaHit	MTG	oxdd	W6QG84	Ascomycota	Eurotiomycetes	Eurotiales	Aspergillaceae	Penicillium	Penicillium roqueforti FM164	MH0462	Healthy	0.00984234
US_men_extra	MTG	oxdd	A0A0E2EPN7	Firmicutes	Bacilli	Lactobacillales	Streptococcaceae	Streptococcus	Streptococcus mutans SM6	10057608	Healthy	0.0907273
US_men_extra	MTG	oxdd	A0A2J9QCX5	Firmicutes	Bacilli	Lactobacillales	Streptococcaceae	Streptococcus	Streptococcus mutans	10057608	Healthy	0.0907273
US_men_extra	MTS	oxdd	A0A0E2EPN7	Firmicutes	Bacilli	Lactobacillales	Streptococcaceae	Streptococcus	Streptococcus mutans SM6	10057608	Healthy	0.0946123
US_men_extra	MTG	oxdd	A0A1M7BDS5	Firmicutes	Clostridia	Clostridiales	Lachnospiraceae	Anaerocolumna	Anaerocolumna jejuensis DSM 15929	10540312	Healthy	0.132577
US_men_extra	MTG	oxdd	A0A0E2EPN7	Firmicutes	Bacilli	Lactobacillales	Streptococcaceae	Streptococcus	Streptococcus mutans SM6	10585880	Healthy	0.104169
US_men_extra	MTG	oxdd	A0A0E9KDV5	Proteobacteria	Alphaproteobacteria	Rhizobiales	Methylobacteriaceae	Methylobacterium	Methylobacterium sp. ME121	10585880	Healthy	0.100594
US_men_extra	MTG	oxdd	A0A1M7BDS5	Firmicutes	Clostridia	Clostridiales	Lachnospiraceae	Anaerocolumna	Anaerocolumna jejuensis DSM 15929	10626339	Healthy	0.114716
US_men_extra	MTG	oxdd	A0A0E2EPN7	Firmicutes	Bacilli	Lactobacillales	Streptococcaceae	Streptococcus	Streptococcus mutans SM6	10807867	Healthy	0.112729
US_men_extra	MTG	oxdd	A0A0E2EPN7	Firmicutes	Bacilli	Lactobacillales	Streptococcaceae	Streptococcus	Streptococcus mutans SM6	11275441	Healthy	0.087405
US_men_extra	MTG	oxdd	A0A1M7BDS5	Firmicutes	Clostridia	Clostridiales	Lachnospiraceae	Anaerocolumna	Anaerocolumna jejuensis DSM 15929	11486372	Healthy	0.0703674
US_men_extra	MTG	oxdd	A0A1M7BDS5	Firmicutes	Clostridia	Clostridiales	Lachnospiraceae	Anaerocolumna	Anaerocolumna jejuensis DSM 15929	11576479	Healthy	0.0446994
US_men_extra	MTG	oxdd	A0A0E2EPN7	Firmicutes	Bacilli	Lactobacillales	Streptococcaceae	Streptococcus	Streptococcus mutans SM6	11715866	Healthy	0.0946327
US_men_extra	MTG	oxdd	A0A059IAI5	Proteobacteria	Gammaproteobacteria	Enterobacterales	Erwiniaceae	Pantoea	Pantoea agglomerans Eh318	11837804	Healthy	0.0805907
US_men_extra	MTG	oxdd	A0A1M7BDS5	Firmicutes	Clostridia	Clostridiales	Lachnospiraceae	Anaerocolumna	Anaerocolumna jejuensis DSM 15929	11919084	Healthy	0.0390056
US_men_extra	MTG	oxdd	A0A1M7BDS5	Firmicutes	Clostridia	Clostridiales	Lachnospiraceae	Anaerocolumna	Anaerocolumna jejuensis DSM 15929	11949935	Healthy	0.0629968
US_men_extra	MTG	oxdd	A0A0E2EPN7	Firmicutes	Bacilli	Lactobacillales	Streptococcaceae	Streptococcus	Streptococcus mutans SM6	11971292	Healthy	0.0798487
US_men_extra	MTG	oxdd	A0A1M7BDS5	Firmicutes	Clostridia	Clostridiales	Lachnospiraceae	Anaerocolumna	Anaerocolumna jejuensis DSM 15929	12214819	Healthy	0.0453901
US_men_extra	MTG	oxdd	A0A0E2EPN7	Firmicutes	Bacilli	Lactobacillales	Streptococcaceae	Streptococcus	Streptococcus mutans SM6	12293355	Healthy	0.124948
US_men_extra	MTG	oxdd	A0A1M7BDS5	Firmicutes	Clostridia	Clostridiales	Lachnospiraceae	Anaerocolumna	Anaerocolumna jejuensis DSM 15929	12294978	Healthy	0.0653033
US_men_extra	MTG	oxdd	A0A1M7BDS5	Firmicutes	Clostridia	Clostridiales	Lachnospiraceae	Anaerocolumna	Anaerocolumna jejuensis DSM 15929	12430629	Healthy	0.127898
US_men_extra	MTG	oxdd	A0A0E2EPN7	Firmicutes	Bacilli	Lactobacillales	Streptococcaceae	Streptococcus	Streptococcus mutans SM6	12656695	Healthy	0.131318
US_men_extra	MTG	oxdd	A0A059IAI5	Proteobacteria	Gammaproteobacteria	Enterobacterales	Erwiniaceae	Pantoea	Pantoea agglomerans Eh318	12780703	Healthy	0.0653061
US_men_extra	MTG	oxdd	A0A1H3THF1	Actinobacteria	Actinobacteria	Micromonosporales	Micromonosporaceae	Asanoa	Asanoa ishikariensis	13530241	Healthy	0.0929332
US_men_extra	MTG	oxdd	A0A1M7BDS5	Firmicutes	Clostridia	Clostridiales	Lachnospiraceae	Anaerocolumna	Anaerocolumna jejuensis DSM 15929	13530241	Healthy	0.0564376
US_men_extra	MTG	oxdd	A0A1M7BDS5	Firmicutes	Clostridia	Clostridiales	Lachnospiraceae	Anaerocolumna	Anaerocolumna jejuensis DSM 15929	13551775	Healthy	0.126683
US_men_extra	MTG	oxdd	A0A1M7BDS5	Firmicutes	Clostridia	Clostridiales	Lachnospiraceae	Anaerocolumna	Anaerocolumna jejuensis DSM 15929	13572279	Healthy	0.0958968
US_men_extra	MTG	oxdd	A0A0E2EPN7	Firmicutes	Bacilli	Lactobacillales	Streptococcaceae	Streptococcus	Streptococcus mutans SM6	13980738	Healthy	0.0998743
US_men_extra	MTG	oxdd	A0A2J9QCX5	Firmicutes	Bacilli	Lactobacillales	Streptococcaceae	Streptococcus	Streptococcus mutans	13980738	Healthy	0.0655603
US_men_extra	MTG	oxdd	A0A0E2EPN7	Firmicutes	Bacilli	Lactobacillales	Streptococcaceae	Streptococcus	Streptococcus mutans SM6	14315964	Healthy	0.040574
US_men_extra	MTG	oxdd	A0A0E2EPN7	Firmicutes	Bacilli	Lactobacillales	Streptococcaceae	Streptococcus	Streptococcus mutans SM6	14590405	Healthy	0.0759978
US_men_extra	MTG	oxdd	A0A1M7BDS5	Firmicutes	Clostridia	Clostridiales	Lachnospiraceae	Anaerocolumna	Anaerocolumna jejuensis DSM 15929	15066469	Healthy	0.0714226
US_men_extra	MTG	oxdd	W6QB31	Ascomycota	Eurotiomycetes	Eurotiales	Aspergillaceae	Penicillium	Penicillium roqueforti FM164	15074981	Healthy	1.28519
US_men_extra	MTG	oxdd	A0A0E2EPN7	Firmicutes	Bacilli	Lactobacillales	Streptococcaceae	Streptococcus	Streptococcus mutans SM6	15721911	Healthy	0.104513
US_men_extra	MTG	oxdd	A0A0E2EPN7	Firmicutes	Bacilli	Lactobacillales	Streptococcaceae	Streptococcus	Streptococcus mutans SM6	15892873	Healthy	0.0939907
US_men_extra	MTG	oxdd	A0A1M7BDS5	Firmicutes	Clostridia	Clostridiales	Lachnospiraceae	Anaerocolumna	Anaerocolumna jejuensis DSM 15929	16240769	Healthy	0.159005
US_men_extra	MTG	oxdd	A0A0E2EPN7	Firmicutes	Bacilli	Lactobacillales	Streptococcaceae	Streptococcus	Streptococcus mutans SM6	16577761	Healthy	0.0363314
US_men_extra	MTG	oxdd	A0A0E2EPN7	Firmicutes	Bacilli	Lactobacillales	Streptococcaceae	Streptococcus	Streptococcus mutans SM6	17259943	Healthy	0.213164
US_men_extra	MTG	oxdd	A0A0E2EPN7	Firmicutes	Bacilli	Lactobacillales	Streptococcaceae	Streptococcus	Streptococcus mutans SM6	17353203	Healthy	0.0386209
US_men_extra	MTG	oxdd	A0A1M7BDS5	Firmicutes	Clostridia	Clostridiales	Lachnospiraceae	Anaerocolumna	Anaerocolumna jejuensis DSM 15929	17671755	Healthy	0.112769
US_men_extra	MTG	oxdd	A0A1M7BDS5	Firmicutes	Clostridia	Clostridiales	Lachnospiraceae	Anaerocolumna	Anaerocolumna jejuensis DSM 15929	17675569	Healthy	0.0605544
US_men_extra	MTG	oxdd	A0A086GF10	Proteobacteria	Gammaproteobacteria	Enterobacterales	Yersiniaceae	Serratia	Serratia nematodiphila DZ0503SBS1	17841344	Healthy	0.450297
US_men_extra	MTG	oxdd	A0A1M7BDS5	Firmicutes	Clostridia	Clostridiales	Lachnospiraceae	Anaerocolumna	Anaerocolumna jejuensis DSM 15929	18346018	Healthy	0.0801462
US_men_extra	MTG	oxdd	A0A0E2EPN7	Firmicutes	Bacilli	Lactobacillales	Streptococcaceae	Streptococcus	Streptococcus mutans SM6	18746474	Healthy	0.0524129
US_men_extra	MTG	oxdd	A0A1M7BDS5	Firmicutes	Clostridia	Clostridiales	Lachnospiraceae	Anaerocolumna	Anaerocolumna jejuensis DSM 15929	18754574	Healthy	0.19151
US_men_extra	MTG	oxdd	A0A1M7BDS5	Firmicutes	Clostridia	Clostridiales	Lachnospiraceae	Anaerocolumna	Anaerocolumna jejuensis DSM 15929	19272639	Healthy	0.0606095
US_men_extra	MTG	oxdd	A0A0E2EPN7	Firmicutes	Bacilli	Lactobacillales	Streptococcaceae	Streptococcus	Streptococcus mutans SM6	19401504	Healthy	0.119767
US_men_extra	MTG	oxdd	A0A1M7BDS5	Firmicutes	Clostridia	Clostridiales	Lachnospiraceae	Anaerocolumna	Anaerocolumna jejuensis DSM 15929	19745900	Healthy	0.0303868
US_men_extra	MTG	oxdd	A0A1M7BDS5	Firmicutes	Clostridia	Clostridiales	Lachnospiraceae	Anaerocolumna	Anaerocolumna jejuensis DSM 15929	19831054	Healthy	0.0772119
US_men_extra	MTG	oxdd	A0A1Z5T7P6	Ascomycota	Dothideomycetes	Capnodiales	Teratosphaeriaceae	Hortaea	Hortaea werneckii EXF-2000	20037920	Healthy	0.0623474
US_men_extra	MTG	oxdd	A0A1M7BDS5	Firmicutes	Clostridia	Clostridiales	Lachnospiraceae	Anaerocolumna	Anaerocolumna jejuensis DSM 15929	20127924	Healthy	0.0405313
US_men_extra	MTG	oxdd	A0A1M7BDS5	Firmicutes	Clostridia	Clostridiales	Lachnospiraceae	Anaerocolumna	Anaerocolumna jejuensis DSM 15929	30095454	Healthy	0.0420157
US_men_extra	MTG	oxdd	A0A0E2EPN7	Firmicutes	Bacilli	Lactobacillales	Streptococcaceae	Streptococcus	Streptococcus mutans SM6	30293054	Healthy	0.187735
US_men_extra	MTG	oxdd	A0A1M7BDS5	Firmicutes	Clostridia	Clostridiales	Lachnospiraceae	Anaerocolumna	Anaerocolumna jejuensis DSM 15929	30575913	Healthy	0.0809675
US_men_extra	MTG	oxdd	I4Y627	Basidiomycota	Wallemiomycetes	Wallemiales	Wallemiaceae	Wallemia	Wallemia mellicola CBS 633.66	30575913	Healthy	0.0357281
US_men_extra	MTG	oxdd	A0A0E2EPN7	Firmicutes	Bacilli	Lactobacillales	Streptococcaceae	Streptococcus	Streptococcus mutans SM6	30594510	Healthy	0.0487841
US_men_extra	MTG	oxdd	A0A0U2XBT4	Firmicutes	Bacilli	Lactobacillales	Enterococcaceae	Enterococcus	Enterococcus rotai	30594510	Healthy	0.0495385
US_men_extra	MTG	oxdd	A0A1H3THF1	Actinobacteria	Actinobacteria	Micromonosporales	Micromonosporaceae	Asanoa	Asanoa ishikariensis	30594510	Healthy	0.049033
US_men_extra	MTG	oxdd	A0A1M7BDS5	Firmicutes	Clostridia	Clostridiales	Lachnospiraceae	Anaerocolumna	Anaerocolumna jejuensis DSM 15929	30594510	Healthy	0.0795717
US_men_extra	MTG	oxdd	A0A2J9QCX5	Firmicutes	Bacilli	Lactobacillales	Streptococcaceae	Streptococcus	Streptococcus mutans	30594510	Healthy	0.0487841
US_men_extra	MTG	oxdd	A0A0E2EPN7	Firmicutes	Bacilli	Lactobacillales	Streptococcaceae	Streptococcus	Streptococcus mutans SM6	30629079	Healthy	0.162314
US_men_extra	MTG	oxdd	A0A0U2XBT4	Firmicutes	Bacilli	Lactobacillales	Enterococcaceae	Enterococcus	Enterococcus rotai	30756617	Healthy	0.0729075
US_men_extra	MTG	oxdd	A0A1M7BDS5	Firmicutes	Clostridia	Clostridiales	Lachnospiraceae	Anaerocolumna	Anaerocolumna jejuensis DSM 15929	30960822	Healthy	0.0289555
US_men_extra	MTG	oxdd	A0A0E2EPN7	Firmicutes	Bacilli	Lactobacillales	Streptococcaceae	Streptococcus	Streptococcus mutans SM6	40006207	Healthy	0.288866
US_men_extra	MTG	oxdd	A0A0E2EPN7	Firmicutes	Bacilli	Lactobacillales	Streptococcaceae	Streptococcus	Streptococcus mutans SM6	40048760	Healthy	0.0371894
US_men_extra	MTG	oxdd	A0A1M7BDS5	Firmicutes	Clostridia	Clostridiales	Lachnospiraceae	Anaerocolumna	Anaerocolumna jejuensis DSM 15929	40053948	Healthy	0.110994
US_men_extra	MTG	oxdd	A0A1M7BDS5	Firmicutes	Clostridia	Clostridiales	Lachnospiraceae	Anaerocolumna	Anaerocolumna jejuensis DSM 15929	40179385	Healthy	0.0695479
US_men_extra	MTG	oxdd	A0A1M7BDS5	Firmicutes	Clostridia	Clostridiales	Lachnospiraceae	Anaerocolumna	Anaerocolumna jejuensis DSM 15929	40262354	Healthy	0.0492767
US_men_extra	MTG	oxdd	A0A1M7BDS5	Firmicutes	Clostridia	Clostridiales	Lachnospiraceae	Anaerocolumna	Anaerocolumna jejuensis DSM 15929	40406457	Healthy	0.0478671
US_men_extra	MTG	oxdd	A0A0E2EPN7	Firmicutes	Bacilli	Lactobacillales	Streptococcaceae	Streptococcus	Streptococcus mutans SM6	40476924	Healthy	0.0716483
US_men_extra	MTG	oxdd	A0A1M7BDS5	Firmicutes	Clostridia	Clostridiales	Lachnospiraceae	Anaerocolumna	Anaerocolumna jejuensis DSM 15929	40476924	Healthy	0.082074
US_men_extra	MTG	oxdd	A0A0E2EPN7	Firmicutes	Bacilli	Lactobacillales	Streptococcaceae	Streptococcus	Streptococcus mutans SM6	40550164	Healthy	0.295438
US_men_extra	MTG	oxdd	A0A1M7BDS5	Firmicutes	Clostridia	Clostridiales	Lachnospiraceae	Anaerocolumna	Anaerocolumna jejuensis DSM 15929	40647106	Healthy	0.0981716
US_men_extra	MTG	oxdd	A0A1M7BDS5	Firmicutes	Clostridia	Clostridiales	Lachnospiraceae	Anaerocolumna	Anaerocolumna jejuensis DSM 15929	40741705	Healthy	0.0702982
US_men_extra	MTG	oxdd	A0A0E2EPN7	Firmicutes	Bacilli	Lactobacillales	Streptococcaceae	Streptococcus	Streptococcus mutans SM6	40913201	Healthy	0.121104
US_men_extra	MTG	oxdd	A0A1M7BDS5	Firmicutes	Clostridia	Clostridiales	Lachnospiraceae	Anaerocolumna	Anaerocolumna jejuensis DSM 15929	50241352	Healthy	0.270273
US_men_extra	MTG	oxdd	A0A1M7BDS5	Firmicutes	Clostridia	Clostridiales	Lachnospiraceae	Anaerocolumna	Anaerocolumna jejuensis DSM 15929	50279110	Healthy	0.0759429
US_men_extra	MTG	oxdd	A0A1M7BDS5	Firmicutes	Clostridia	Clostridiales	Lachnospiraceae	Anaerocolumna	Anaerocolumna jejuensis DSM 15929	50304865	Healthy	0.0926604
US_men_extra	MTG	oxdd	A0A0E2EPN7	Firmicutes	Bacilli	Lactobacillales	Streptococcaceae	Streptococcus	Streptococcus mutans SM6	50466110	Healthy	0.133736
US_men_extra	MTG	oxdd	A0A0E2EPN7	Firmicutes	Bacilli	Lactobacillales	Streptococcaceae	Streptococcus	Streptococcus mutans SM6	50745639	Healthy	0.0531377
US_men_extra	MTG	oxdd	A0A1M7BDS5	Firmicutes	Clostridia	Clostridiales	Lachnospiraceae	Anaerocolumna	Anaerocolumna jejuensis DSM 15929	50745639	Healthy	0.104362
US_men_extra	MTG	oxdd	A0A0E2EPN7	Firmicutes	Bacilli	Lactobacillales	Streptococcaceae	Streptococcus	Streptococcus mutans SM6	60200027	Healthy	0.211962
US_men_extra	MTG	oxdd	A0A0E2EPN7	Firmicutes	Bacilli	Lactobacillales	Streptococcaceae	Streptococcus	Streptococcus mutans SM6	70005253	Healthy	0.218062
US_men_extra	MTG	oxdd	A0A1M7BDS5	Firmicutes	Clostridia	Clostridiales	Lachnospiraceae	Anaerocolumna	Anaerocolumna jejuensis DSM 15929	70312587	Healthy	0.128393
US_men_extra	MTG	oxdd	A0A0E2EPN7	Firmicutes	Bacilli	Lactobacillales	Streptococcaceae	Streptococcus	Streptococcus mutans SM6	70488374	Healthy	0.0977535
US_men_extra	MTG	oxdd	A0A1M7BDS5	Firmicutes	Clostridia	Clostridiales	Lachnospiraceae	Anaerocolumna	Anaerocolumna jejuensis DSM 15929	70510290	Healthy	0.170544
US_men_extra	MTG	oxdd	A0A1M7BDS5	Firmicutes	Clostridia	Clostridiales	Lachnospiraceae	Anaerocolumna	Anaerocolumna jejuensis DSM 15929	70572554	Healthy	0.0653827
US_men_extra	MTG	oxdd	A0A1M7BDS5	Firmicutes	Clostridia	Clostridiales	Lachnospiraceae	Anaerocolumna	Anaerocolumna jejuensis DSM 15929	70608855	Healthy	0.11331
US_men_extra	MTG	oxdd	A0A1M7BDS5	Firmicutes	Clostridia	Clostridiales	Lachnospiraceae	Anaerocolumna	Anaerocolumna jejuensis DSM 15929	70802023	Healthy	0.0775752
US_men_extra	MTG	oxdd	A0A1M7BDS5	Firmicutes	Clostridia	Clostridiales	Lachnospiraceae	Anaerocolumna	Anaerocolumna jejuensis DSM 15929	70995736	Healthy	0.0622898
US_men_extra	MTG	oxdd	A0A2V4VXE9	Firmicutes	Bacilli	Bacillales	Paenibacillaceae	Paenibacillus	Paenibacillus barcinonensis	70995736	Healthy	0.0502203
US_men_extra	MTG	oxdd	A0A0E2EPN7	Firmicutes	Bacilli	Lactobacillales	Streptococcaceae	Streptococcus	Streptococcus mutans SM6	71041789	Healthy	0.0375201
US_men_extra	MTG	oxdd	A0A0E2EPN7	Firmicutes	Bacilli	Lactobacillales	Streptococcaceae	Streptococcus	Streptococcus mutans SM6	71191223	Healthy	0.10385
US_men_extra	MTG	oxdd	A0A1M7BDS5	Firmicutes	Clostridia	Clostridiales	Lachnospiraceae	Anaerocolumna	Anaerocolumna jejuensis DSM 15929	71382449	Healthy	0.0501116
US_men_extra	MTG	oxdd	A0A2P4ZD02	Ascomycota	Sordariomycetes	Hypocreales	Hypocreaceae	Trichoderma	Trichoderma gamsii	71429144	Healthy	0.0251066
US_men_extra	MTG	oxdd	A0A0E2EPN7	Firmicutes	Bacilli	Lactobacillales	Streptococcaceae	Streptococcus	Streptococcus mutans SM6	71448977	Healthy	0.143821
US_men_extra	MTG	oxdd	A0A2J9QCX5	Firmicutes	Bacilli	Lactobacillales	Streptococcaceae	Streptococcus	Streptococcus mutans	71448977	Healthy	0.0302432
US_men_extra	MTG	oxdd	A0A0E2EPN7	Firmicutes	Bacilli	Lactobacillales	Streptococcaceae	Streptococcus	Streptococcus mutans SM6	71474566	Healthy	0.0519657
US_men_extra	MTG	oxdd	A0A1M7BDS5	Firmicutes	Clostridia	Clostridiales	Lachnospiraceae	Anaerocolumna	Anaerocolumna jejuensis DSM 15929	71474566	Healthy	0.175434
US_men_extra	MTG	oxdd	A0A1M7BDS5	Firmicutes	Clostridia	Clostridiales	Lachnospiraceae	Anaerocolumna	Anaerocolumna jejuensis DSM 15929	71645778	Healthy	0.064684
US_men_extra	MTG	oxdd	A0A1M7BDS5	Firmicutes	Clostridia	Clostridiales	Lachnospiraceae	Anaerocolumna	Anaerocolumna jejuensis DSM 15929	71869016	Healthy	0.102259
US_men_extra	MTG	oxdd	A0A0E2EPN7	Firmicutes	Bacilli	Lactobacillales	Streptococcaceae	Streptococcus	Streptococcus mutans SM6	72111792	Healthy	0.127683
US_men_extra	MTG	oxdd	A0A1M7BDS5	Firmicutes	Clostridia	Clostridiales	Lachnospiraceae	Anaerocolumna	Anaerocolumna jejuensis DSM 15929	72233627	Healthy	0.0936668
US_men_extra	MTG	oxdd	A0A1M7BDS5	Firmicutes	Clostridia	Clostridiales	Lachnospiraceae	Anaerocolumna	Anaerocolumna jejuensis DSM 15929	72251940	Healthy	0.0918313
AMP	MTG	frc	A0A087ADU5	Actinobacteria	Actinobacteria	Bifidobacteriales	Bifidobacteriaceae	Bifidobacterium	Bifidobacterium choerinum	Breezer	Healthy	0.106699
AMP	MTG	frc	A0A0L7BLA3	Actinobacteria	Actinobacteria	Bifidobacteriales	Bifidobacteriaceae	Bifidobacterium	Bifidobacterium animalis subsp. animalis MCC 0483	Breezer	Healthy	0.10694
AMP	MTG	frc	A0A248X7K1	Actinobacteria	Actinobacteria	Bifidobacteriales	Bifidobacteriaceae	Bifidobacterium	Bifidobacterium pseudolongum	Breezer	Healthy	0.106699
AMP	MTG	frc	A0A377BTA6	Proteobacteria	Gammaproteobacteria	Enterobacterales	Enterobacteriaceae	Escherichia	Escherichia coli	Breezer	Healthy	0.315745
AMP	MTG	frc	C3X762	Proteobacteria	Betaproteobacteria	Burkholderiales	Oxalobacteraceae	Oxalobacter	Oxalobacter formigenes HOxBLS	Breezer	Healthy	0.529241
AMP	MTG	frc	O06644	Proteobacteria	Betaproteobacteria	Burkholderiales	Oxalobacteraceae	Oxalobacter	Oxalobacter formigenes	Breezer	Healthy	0.539982
AMP	MTG	frc	A0A209A2M1	Proteobacteria	Gammaproteobacteria	Enterobacterales	Yersiniaceae	Yersinia	Yersinia frederiksenii	Commencal	Healthy	0.0203546
AMP	MTG	frc	A1ADQ1	Proteobacteria	Gammaproteobacteria	Enterobacterales	Enterobacteriaceae	Escherichia	Escherichia coli APEC O1	Commencal	Healthy	1.32726
AMP	MTG	frc	B5YYX4	Proteobacteria	Gammaproteobacteria	Enterobacterales	Enterobacteriaceae	Escherichia	Escherichia coli O157:H7 str. EC4115	Commencal	Healthy	0.241319
AMP	MTG	frc	C3X762	Proteobacteria	Betaproteobacteria	Burkholderiales	Oxalobacteraceae	Oxalobacter	Oxalobacter formigenes HOxBLS	Commencal	Healthy	0.236766
AMP	MTG	frc	O06644	Proteobacteria	Betaproteobacteria	Burkholderiales	Oxalobacteraceae	Oxalobacter	Oxalobacter formigenes	Commencal	Healthy	0.293192
AMP	MTS	frc	A1ADQ1	Proteobacteria	Gammaproteobacteria	Enterobacterales	Enterobacteriaceae	Escherichia	Escherichia coli APEC O1	Commencal	Healthy	0.0577233
AMP	MTS	frc	C3X762	Proteobacteria	Betaproteobacteria	Burkholderiales	Oxalobacteraceae	Oxalobacter	Oxalobacter formigenes HOxBLS	Commencal	Healthy	1.13268
AMP	MTS	frc	O06644	Proteobacteria	Betaproteobacteria	Burkholderiales	Oxalobacteraceae	Oxalobacter	Oxalobacter formigenes	Commencal	Healthy	0.374033
AMP	MTS	frc	R9KTQ7	Actinobacteria	Coriobacteriia	Eggerthellales	Eggerthellaceae	Enterorhabdus	Enterorhabdus caecimuris B7	Commencal	Healthy	0.0175919
AMP	MTG	frc	A0A1B1SBJ2	Bacteroidetes	Bacteroidia	Bacteroidales	Muribaculaceae	Muribaculum	Muribaculum intestinale	Cove	Healthy	0.0573674
AMP	MTG	frc	R9KTQ7	Actinobacteria	Coriobacteriia	Eggerthellales	Eggerthellaceae	Enterorhabdus	Enterorhabdus caecimuris B7	Cove	Healthy	0.0549718
AMP	MTS	frc	R9KTQ7	Actinobacteria	Coriobacteriia	Eggerthellales	Eggerthellaceae	Enterorhabdus	Enterorhabdus caecimuris B7	Cove	Healthy	0.0395014
AMP	MTG	frc	A0A072MW66	Actinobacteria	Actinobacteria	Bifidobacteriales	Bifidobacteriaceae	Bifidobacterium	Bifidobacterium pseudocatenulatum IPLA36007	Crank	Healthy	0.518663
AMP	MTG	frc	A0A087ADU5	Actinobacteria	Actinobacteria	Bifidobacteriales	Bifidobacteriaceae	Bifidobacterium	Bifidobacterium choerinum	Crank	Healthy	0.151393
AMP	MTG	frc	A0A0L7BLA3	Actinobacteria	Actinobacteria	Bifidobacteriales	Bifidobacteriaceae	Bifidobacterium	Bifidobacterium animalis subsp. animalis MCC 0483	Crank	Healthy	0.0758676
AMP	MTG	frc	A0A174BHB6	Actinobacteria	Actinobacteria	Bifidobacteriales	Bifidobacteriaceae	Bifidobacterium	Bifidobacterium pseudocatenulatum	Crank	Healthy	0.0239383
AMP	MTG	frc	A0A2A2EHW6	Actinobacteria	Actinobacteria	Bifidobacteriales	Bifidobacteriaceae	Bifidobacterium	Bifidobacterium criceti	Crank	Healthy	0.0753573
AMP	MTG	frc	A1ADQ1	Proteobacteria	Gammaproteobacteria	Enterobacterales	Enterobacteriaceae	Escherichia	Escherichia coli APEC O1	Crank	Healthy	0.134653
AMP	MTG	frc	C3X762	Proteobacteria	Betaproteobacteria	Burkholderiales	Oxalobacteraceae	Oxalobacter	Oxalobacter formigenes HOxBLS	Crank	Healthy	0.0528449
AMP	MTG	frc	O06644	Proteobacteria	Betaproteobacteria	Burkholderiales	Oxalobacteraceae	Oxalobacter	Oxalobacter formigenes	Crank	Healthy	0.0261755
AMP	MTS	frc	A0A1Q6EIZ9	Bacteroidetes	Bacteroidia	Bacteroidales	NA	NA	Bacteroidales bacterium 52_46	Crank	Healthy	0.020104
AMP	MTS	frc	C3X762	Proteobacteria	Betaproteobacteria	Burkholderiales	Oxalobacteraceae	Oxalobacter	Oxalobacter formigenes HOxBLS	Crank	Healthy	0.164625
AMP	MTS	frc	R5AR18	Bacteroidetes	Bacteroidia	Bacteroidales	Prevotellaceae	Prevotella	Prevotella sp. CAG:1031	Crank	Healthy	0.0800471
AMP	MTG	frc	C3X762	Proteobacteria	Betaproteobacteria	Burkholderiales	Oxalobacteraceae	Oxalobacter	Oxalobacter formigenes HOxBLS	Deity	Healthy	0.268706
AMP	MTG	frc	O06644	Proteobacteria	Betaproteobacteria	Burkholderiales	Oxalobacteraceae	Oxalobacter	Oxalobacter formigenes	Deity	Healthy	0.0665488
AMP	MTS	frc	A0A377BTA6	Proteobacteria	Gammaproteobacteria	Enterobacterales	Enterobacteriaceae	Escherichia	Escherichia coli	Deity	Healthy	0.216587
AMP	MTS	frc	C3X762	Proteobacteria	Betaproteobacteria	Burkholderiales	Oxalobacteraceae	Oxalobacter	Oxalobacter formigenes HOxBLS	Deity	Healthy	0.633532
AMP	MTS	frc	O06644	Proteobacteria	Betaproteobacteria	Burkholderiales	Oxalobacteraceae	Oxalobacter	Oxalobacter formigenes	Deity	Healthy	0.344735
AMP	MTG	frc	A1ADQ1	Proteobacteria	Gammaproteobacteria	Enterobacterales	Enterobacteriaceae	Escherichia	Escherichia coli APEC O1	Devinci	Healthy	0.306187
AMP	MTG	frc	C3X762	Proteobacteria	Betaproteobacteria	Burkholderiales	Oxalobacteraceae	Oxalobacter	Oxalobacter formigenes HOxBLS	Devinci	Healthy	0.281415
AMP	MTG	frc	O06644	Proteobacteria	Betaproteobacteria	Burkholderiales	Oxalobacteraceae	Oxalobacter	Oxalobacter formigenes	Devinci	Healthy	0.410252
AMP	MTS	frc	C3X762	Proteobacteria	Betaproteobacteria	Burkholderiales	Oxalobacteraceae	Oxalobacter	Oxalobacter formigenes HOxBLS	Devinci	Healthy	0.0471988
AMP	MTS	frc	O06644	Proteobacteria	Betaproteobacteria	Burkholderiales	Oxalobacteraceae	Oxalobacter	Oxalobacter formigenes	Devinci	Healthy	0.0116894
AMP	MTG	frc	A0A087QB11	Firmicutes	Bacilli	Lactobacillales	Lactobacillaceae	Lactobacillus	Lactobacillus gasseri SV-16A-US	Easton	Healthy	0.0327119
AMP	MTG	frc	A0A1V3Y246	Firmicutes	Bacilli	Lactobacillales	Lactobacillaceae	Lactobacillus	Lactobacillus gasseri	Easton	Healthy	0.0327119
AMP	MTS	frc	C3X762	Proteobacteria	Betaproteobacteria	Burkholderiales	Oxalobacteraceae	Oxalobacter	Oxalobacter formigenes HOxBLS	Enve	Healthy	0.0201332
AMP	MTG	frc	A0A377BTA6	Proteobacteria	Gammaproteobacteria	Enterobacterales	Enterobacteriaceae	Escherichia	Escherichia coli	Giant	Healthy	0.141661
AMP	MTG	frc	A1ADQ1	Proteobacteria	Gammaproteobacteria	Enterobacterales	Enterobacteriaceae	Escherichia	Escherichia coli APEC O1	Giant	Healthy	0.0750873
AMP	MTG	frc	C3X762	Proteobacteria	Betaproteobacteria	Burkholderiales	Oxalobacteraceae	Oxalobacter	Oxalobacter formigenes HOxBLS	Giant	Healthy	0.147341
AMP	MTG	frc	O06644	Proteobacteria	Betaproteobacteria	Burkholderiales	Oxalobacteraceae	Oxalobacter	Oxalobacter formigenes	Giant	Healthy	0.0729821
AMP	MTS	frc	A0A377BTA6	Proteobacteria	Gammaproteobacteria	Enterobacterales	Enterobacteriaceae	Escherichia	Escherichia coli	Giant	Healthy	0.0643683
AMP	MTS	frc	C3X762	Proteobacteria	Betaproteobacteria	Burkholderiales	Oxalobacteraceae	Oxalobacter	Oxalobacter formigenes HOxBLS	Giant	Healthy	3.95
AMP	MTS	frc	O06644	Proteobacteria	Betaproteobacteria	Burkholderiales	Oxalobacteraceae	Oxalobacter	Oxalobacter formigenes	Giant	Healthy	0.862204
AMP	MTG	frc	A0A072MW66	Actinobacteria	Actinobacteria	Bifidobacteriales	Bifidobacteriaceae	Bifidobacterium	Bifidobacterium pseudocatenulatum IPLA36007	Huffy	Healthy	4.44503
AMP	MTG	frc	A0A0A7I974	Actinobacteria	Actinobacteria	Bifidobacteriales	Bifidobacteriaceae	Bifidobacterium	Bifidobacterium pseudolongum PV8-2	Huffy	Healthy	0.0227626
AMP	MTG	frc	A0A174BHB6	Actinobacteria	Actinobacteria	Bifidobacteriales	Bifidobacteriaceae	Bifidobacterium	Bifidobacterium pseudocatenulatum	Huffy	Healthy	0.36712
AMP	MTG	frc	A0A174S0X3	Firmicutes	Clostridia	Clostridiales	Clostridiaceae	Clostridium	Clostridium baratii	Huffy	Healthy	0.0238927
AMP	MTG	frc	A0A1Q6EIZ9	Bacteroidetes	Bacteroidia	Bacteroidales	NA	NA	Bacteroidales bacterium 52_46	Huffy	Healthy	0.0232871
AMP	MTG	frc	A0A1Q6EPI6	Actinobacteria	Actinobacteria	Bifidobacteriales	Bifidobacteriaceae	Bifidobacterium	Bifidobacterium sp. 56_9_plus	Huffy	Healthy	0.224093
AMP	MTG	frc	A0A1V8Q5N2	Actinobacteria	Actinobacteria	Bifidobacteriales	Bifidobacteriaceae	Bifidobacterium	Bifidobacterium dentium	Huffy	Healthy	0.0231803
AMP	MTG	frc	A0A377BTA6	Proteobacteria	Gammaproteobacteria	Enterobacterales	Enterobacteriaceae	Escherichia	Escherichia coli	Huffy	Healthy	0.252092
AMP	MTG	frc	A1ADQ1	Proteobacteria	Gammaproteobacteria	Enterobacterales	Enterobacteriaceae	Escherichia	Escherichia coli APEC O1	Huffy	Healthy	0.170063
AMP	MTG	frc	B5YYX4	Proteobacteria	Gammaproteobacteria	Enterobacterales	Enterobacteriaceae	Escherichia	Escherichia coli O157:H7 str. EC4115	Huffy	Healthy	0.0485894
AMP	MTS	frc	A0A072MW66	Actinobacteria	Actinobacteria	Bifidobacteriales	Bifidobacteriaceae	Bifidobacterium	Bifidobacterium pseudocatenulatum IPLA36007	Huffy	Healthy	0.0278762
AMP	MTS	frc	A0A1Q6U8Z5	Proteobacteria	Alphaproteobacteria	Rhodospirillales	Rhodospirillaceae	Azospirillum	Azospirillum sp. 51_20	Huffy	Healthy	0.0285368
AMP	MTG	frc	A0A1Q6EIZ9	Bacteroidetes	Bacteroidia	Bacteroidales	NA	NA	Bacteroidales bacterium 52_46	Ibis	Healthy	0.189181
AMP	MTG	frc	A0A354HZG4	Bacteroidetes	Bacteroidia	Bacteroidales	Porphyromonadaceae	NA	Porphyromonadaceae bacterium	Ibis	Healthy	0.0317497
AMP	MTG	frc	A0A355Z7A2	Bacteroidetes	Bacteroidia	Bacteroidales	Porphyromonadaceae	NA	Porphyromonadaceae bacterium	Ibis	Healthy	0.0316762
AMP	MTG	frc	C3X762	Proteobacteria	Betaproteobacteria	Burkholderiales	Oxalobacteraceae	Oxalobacter	Oxalobacter formigenes HOxBLS	Ibis	Healthy	0.451834
AMP	MTG	frc	O06644	Proteobacteria	Betaproteobacteria	Burkholderiales	Oxalobacteraceae	Oxalobacter	Oxalobacter formigenes	Ibis	Healthy	0.223805
AMP	MTG	frc	R5AR18	Bacteroidetes	Bacteroidia	Bacteroidales	Prevotellaceae	Prevotella	Prevotella sp. CAG:1031	Ibis	Healthy	1.19265
AMP	MTS	frc	A0A1F4IAS5	Proteobacteria	Betaproteobacteria	Burkholderiales	NA	NA	Burkholderiales bacterium RIFCSPHIGHO2_12_FULL_61_	Ibis	Healthy	0.191608
AMP	MTS	frc	A0A1Q6EIZ9	Bacteroidetes	Bacteroidia	Bacteroidales	NA	NA	Bacteroidales bacterium 52_46	Ibis	Healthy	0.18402
AMP	MTS	frc	C3X762	Proteobacteria	Betaproteobacteria	Burkholderiales	Oxalobacteraceae	Oxalobacter	Oxalobacter formigenes HOxBLS	Ibis	Healthy	3.08493
AMP	MTS	frc	O06644	Proteobacteria	Betaproteobacteria	Burkholderiales	Oxalobacteraceae	Oxalobacter	Oxalobacter formigenes	Ibis	Healthy	0.563901
AMP	MTS	frc	R5AR18	Bacteroidetes	Bacteroidia	Bacteroidales	Prevotellaceae	Prevotella	Prevotella sp. CAG:1031	Ibis	Healthy	0.554541
AMP	MTG	frc	A0A377BTA6	Proteobacteria	Gammaproteobacteria	Enterobacterales	Enterobacteriaceae	Escherichia	Escherichia coli	Intense	Healthy	0.328522
AMP	MTG	frc	A1ADQ1	Proteobacteria	Gammaproteobacteria	Enterobacterales	Enterobacteriaceae	Escherichia	Escherichia coli APEC O1	Intense	Healthy	0.80001
AMP	MTG	frc	C3X762	Proteobacteria	Betaproteobacteria	Burkholderiales	Oxalobacteraceae	Oxalobacter	Oxalobacter formigenes HOxBLS	Intense	Healthy	0.296132
AMP	MTG	frc	O06644	Proteobacteria	Betaproteobacteria	Burkholderiales	Oxalobacteraceae	Oxalobacter	Oxalobacter formigenes	Intense	Healthy	0.31908
AMP	MTS	frc	A0A1Q6EIZ9	Bacteroidetes	Bacteroidia	Bacteroidales	NA	NA	Bacteroidales bacterium 52_46	Intense	Healthy	0.0336906
AMP	MTS	frc	C3X762	Proteobacteria	Betaproteobacteria	Burkholderiales	Oxalobacteraceae	Oxalobacter	Oxalobacter formigenes HOxBLS	Intense	Healthy	4.34514
AMP	MTS	frc	O06644	Proteobacteria	Betaproteobacteria	Burkholderiales	Oxalobacteraceae	Oxalobacter	Oxalobacter formigenes	Intense	Healthy	1.26403
AMP	MTG	frc	A0A087ADU5	Actinobacteria	Actinobacteria	Bifidobacteriales	Bifidobacteriaceae	Bifidobacterium	Bifidobacterium choerinum	IronHorse	Healthy	0.146056
AMP	MTG	frc	A0A0A7I974	Actinobacteria	Actinobacteria	Bifidobacteriales	Bifidobacteriaceae	Bifidobacterium	Bifidobacterium pseudolongum PV8-2	IronHorse	Healthy	0.0730809
AMP	MTG	frc	A0A0L7BLA3	Actinobacteria	Actinobacteria	Bifidobacteriales	Bifidobacteriaceae	Bifidobacterium	Bifidobacterium animalis subsp. animalis MCC 0483	IronHorse	Healthy	0.183008
AMP	MTG	frc	A0A377BTA6	Proteobacteria	Gammaproteobacteria	Enterobacterales	Enterobacteriaceae	Escherichia	Escherichia coli	IronHorse	Healthy	0.185977
AMP	MTG	frc	A1ADQ1	Proteobacteria	Gammaproteobacteria	Enterobacterales	Enterobacteriaceae	Escherichia	Escherichia coli APEC O1	IronHorse	Healthy	0.156
AMP	MTG	frc	A0A072MW66	Actinobacteria	Actinobacteria	Bifidobacteriales	Bifidobacteriaceae	Bifidobacterium	Bifidobacterium pseudocatenulatum IPLA36007	Jamis	Healthy	0.0189927
AMP	MTG	frc	A0A072MW66	Actinobacteria	Actinobacteria	Bifidobacteriales	Bifidobacteriaceae	Bifidobacterium	Bifidobacterium pseudocatenulatum IPLA36007	Juliana	Healthy	0.895742
AMP	MTG	frc	A0A174BHB6	Actinobacteria	Actinobacteria	Bifidobacteriales	Bifidobacteriaceae	Bifidobacterium	Bifidobacterium pseudocatenulatum	Juliana	Healthy	0.0769153
AMP	MTG	frc	A0A1Q6EPI6	Actinobacteria	Actinobacteria	Bifidobacteriales	Bifidobacteriaceae	Bifidobacterium	Bifidobacterium sp. 56_9_plus	Juliana	Healthy	0.0598609
AMP	MTG	frc	A1ADQ1	Proteobacteria	Gammaproteobacteria	Enterobacterales	Enterobacteriaceae	Escherichia	Escherichia coli APEC O1	Juliana	Healthy	0.0216324
AMP	MTS	frc	O06644	Proteobacteria	Betaproteobacteria	Burkholderiales	Oxalobacteraceae	Oxalobacter	Oxalobacter formigenes	Juliana	Healthy	0.0545775
AMP	MTG	frc	A0A072MW66	Actinobacteria	Actinobacteria	Bifidobacteriales	Bifidobacteriaceae	Bifidobacterium	Bifidobacterium pseudocatenulatum IPLA36007	Knolly	Healthy	1.96406
AMP	MTG	frc	A0A087B567	Actinobacteria	Actinobacteria	Bifidobacteriales	Bifidobacteriaceae	Bifidobacterium	Bifidobacterium cuniculi	Knolly	Healthy	0.0999242
AMP	MTG	frc	A0A0A7I974	Actinobacteria	Actinobacteria	Bifidobacteriales	Bifidobacteriaceae	Bifidobacterium	Bifidobacterium pseudolongum PV8-2	Knolly	Healthy	0.455291
AMP	MTG	frc	A0A174BHB6	Actinobacteria	Actinobacteria	Bifidobacteriales	Bifidobacteriaceae	Bifidobacterium	Bifidobacterium pseudocatenulatum	Knolly	Healthy	0.306788
AMP	MTG	frc	A0A1B1SBJ2	Bacteroidetes	Bacteroidia	Bacteroidales	Muribaculaceae	Muribaculum	Muribaculum intestinale	Knolly	Healthy	0.441071
AMP	MTG	frc	A0A1Q6EPI6	Actinobacteria	Actinobacteria	Bifidobacteriales	Bifidobacteriaceae	Bifidobacterium	Bifidobacterium sp. 56_9_plus	Knolly	Healthy	0.377912
AMP	MTG	frc	A0A2N3QI38	Actinobacteria	Actinobacteria	Bifidobacteriales	Bifidobacteriaceae	Bifidobacterium	Bifidobacterium pseudolongum subsp. globosum	Knolly	Healthy	0.0999242
AMP	MTG	frc	A0A2V1IPP0	Bacteroidetes	Bacteroidia	Bacteroidales	Muribaculaceae	NA	Muribaculaceae bacterium DSM 103720	Knolly	Healthy	0.478339
AMP	MTG	frc	A0A2V1J0Z5	Bacteroidetes	Bacteroidia	Bacteroidales	Muribaculaceae	NA	Muribaculaceae bacterium DSM 100764	Knolly	Healthy	0.102469
AMP	MTG	frc	A0A2X5G0L0	Proteobacteria	Gammaproteobacteria	Enterobacterales	Enterobacteriaceae	Escherichia	Escherichia coli	Knolly	Healthy	0.564612
AMP	MTG	frc	A0A354HZG4	Bacteroidetes	Bacteroidia	Bacteroidales	Porphyromonadaceae	NA	Porphyromonadaceae bacterium	Knolly	Healthy	0.205413
AMP	MTG	frc	A0A377BTA6	Proteobacteria	Gammaproteobacteria	Enterobacterales	Enterobacteriaceae	Escherichia	Escherichia coli	Knolly	Healthy	2.06243
AMP	MTG	frc	A1ADQ1	Proteobacteria	Gammaproteobacteria	Enterobacterales	Enterobacteriaceae	Escherichia	Escherichia coli APEC O1	Knolly	Healthy	0.611161
AMP	MTG	frc	C3X762	Proteobacteria	Betaproteobacteria	Burkholderiales	Oxalobacteraceae	Oxalobacter	Oxalobacter formigenes HOxBLS	Knolly	Healthy	0.571409
AMP	MTG	frc	D1NS91	Actinobacteria	Actinobacteria	Bifidobacteriales	Bifidobacteriaceae	Bifidobacterium	Bifidobacterium gallicum DSM 20093 = LMG 11596	Knolly	Healthy	0.101065
AMP	MTG	frc	O06644	Proteobacteria	Betaproteobacteria	Burkholderiales	Oxalobacteraceae	Oxalobacter	Oxalobacter formigenes	Knolly	Healthy	0.567494
AMP	MTS	frc	A1ADQ1	Proteobacteria	Gammaproteobacteria	Enterobacterales	Enterobacteriaceae	Escherichia	Escherichia coli APEC O1	Knolly	Healthy	0.251131
AMP	MTS	frc	C3X762	Proteobacteria	Betaproteobacteria	Burkholderiales	Oxalobacteraceae	Oxalobacter	Oxalobacter formigenes HOxBLS	Knolly	Healthy	0.293935
AMP	MTS	frc	O06644	Proteobacteria	Betaproteobacteria	Burkholderiales	Oxalobacteraceae	Oxalobacter	Oxalobacter formigenes	Knolly	Healthy	0.145488
AMP	MTG	frc	A0A1V8Q5N2	Actinobacteria	Actinobacteria	Bifidobacteriales	Bifidobacteriaceae	Bifidobacterium	Bifidobacterium dentium	Merlin	Healthy	0.0260718
AMP	MTG	frc	A1ADQ1	Proteobacteria	Gammaproteobacteria	Enterobacterales	Enterobacteriaceae	Escherichia	Escherichia coli APEC O1	Merlin	Healthy	0.792433
AMP	MTG	frc	C3X762	Proteobacteria	Betaproteobacteria	Burkholderiales	Oxalobacteraceae	Oxalobacter	Oxalobacter formigenes HOxBLS	Merlin	Healthy	0.348526
AMP	MTG	frc	O06644	Proteobacteria	Betaproteobacteria	Burkholderiales	Oxalobacteraceae	Oxalobacter	Oxalobacter formigenes	Merlin	Healthy	0.292151
AMP	MTS	frc	A0A377BTA6	Proteobacteria	Gammaproteobacteria	Enterobacterales	Enterobacteriaceae	Escherichia	Escherichia coli	Merlin	Healthy	0.059545
AMP	MTS	frc	C3X2D4	Proteobacteria	Betaproteobacteria	Burkholderiales	Oxalobacteraceae	Oxalobacter	Oxalobacter formigenes HOxBLS	Merlin	Healthy	0.062226
AMP	MTS	frc	C3X762	Proteobacteria	Betaproteobacteria	Burkholderiales	Oxalobacteraceae	Oxalobacter	Oxalobacter formigenes HOxBLS	Merlin	Healthy	3.87078
AMP	MTS	frc	O06644	Proteobacteria	Betaproteobacteria	Burkholderiales	Oxalobacteraceae	Oxalobacter	Oxalobacter formigenes	Merlin	Healthy	1.59519
AMP	MTG	frc	A0A377BTA6	Proteobacteria	Gammaproteobacteria	Enterobacterales	Enterobacteriaceae	Escherichia	Escherichia coli	Mongoose	Healthy	0.182429
AMP	MTG	frc	A1ADQ1	Proteobacteria	Gammaproteobacteria	Enterobacterales	Enterobacteriaceae	Escherichia	Escherichia coli APEC O1	Mongoose	Healthy	0.459491
AMP	MTS	frc	A0A1Q6U8Z5	Proteobacteria	Alphaproteobacteria	Rhodospirillales	Rhodospirillaceae	Azospirillum	Azospirillum sp. 51_20	Mongoose	Healthy	0.0621341
AMP	MTS	frc	C3X762	Proteobacteria	Betaproteobacteria	Burkholderiales	Oxalobacteraceae	Oxalobacter	Oxalobacter formigenes HOxBLS	Mongoose	Healthy	0.0622221
AMP	MTG	frc	A0A1Q6EIZ9	Bacteroidetes	Bacteroidia	Bacteroidales	NA	NA	Bacteroidales bacterium 52_46	Niner	Healthy	0.208326
AMP	MTG	frc	A0A377BTA6	Proteobacteria	Gammaproteobacteria	Enterobacterales	Enterobacteriaceae	Escherichia	Escherichia coli	Niner	Healthy	0.174991
AMP	MTG	frc	A1ADQ1	Proteobacteria	Gammaproteobacteria	Enterobacterales	Enterobacteriaceae	Escherichia	Escherichia coli APEC O1	Niner	Healthy	0.32505
AMP	MTG	frc	B5YYX4	Proteobacteria	Gammaproteobacteria	Enterobacterales	Enterobacteriaceae	Escherichia	Escherichia coli O157:H7 str. EC4115	Niner	Healthy	0.274731
AMP	MTG	frc	C3X762	Proteobacteria	Betaproteobacteria	Burkholderiales	Oxalobacteraceae	Oxalobacter	Oxalobacter formigenes HOxBLS	Niner	Healthy	0.466968
AMP	MTG	frc	O06644	Proteobacteria	Betaproteobacteria	Burkholderiales	Oxalobacteraceae	Oxalobacter	Oxalobacter formigenes	Niner	Healthy	0.212035
AMP	MTS	frc	C3X762	Proteobacteria	Betaproteobacteria	Burkholderiales	Oxalobacteraceae	Oxalobacter	Oxalobacter formigenes HOxBLS	Niner	Healthy	0.16062
AMP	MTS	frc	O06644	Proteobacteria	Betaproteobacteria	Burkholderiales	Oxalobacteraceae	Oxalobacter	Oxalobacter formigenes	Niner	Healthy	0.0636474
AMP	MTG	frc	A0A087BE81	Actinobacteria	Actinobacteria	Bifidobacteriales	Bifidobacteriaceae	Bifidobacterium	Bifidobacterium magnum	Norco	Healthy	0.0352157
AMP	MTG	frc	C3X762	Proteobacteria	Betaproteobacteria	Burkholderiales	Oxalobacteraceae	Oxalobacter	Oxalobacter formigenes HOxBLS	Norco	Healthy	0.0365446
AMP	MTG	frc	O06644	Proteobacteria	Betaproteobacteria	Burkholderiales	Oxalobacteraceae	Oxalobacter	Oxalobacter formigenes	Norco	Healthy	0.036203
AMP	MTS	frc	C3X762	Proteobacteria	Betaproteobacteria	Burkholderiales	Oxalobacteraceae	Oxalobacter	Oxalobacter formigenes HOxBLS	Norco	Healthy	0.644665
AMP	MTS	frc	O06644	Proteobacteria	Betaproteobacteria	Burkholderiales	Oxalobacteraceae	Oxalobacter	Oxalobacter formigenes	Norco	Healthy	0.199575
AMP	MTS	frc	A0A1B8SW60	Proteobacteria	Gammaproteobacteria	Enterobacterales	Morganellaceae	Providencia	Providencia rettgeri	Pinarello	Healthy	0.0620366
AMP	MTS	frc	A1ADQ1	Proteobacteria	Gammaproteobacteria	Enterobacterales	Enterobacteriaceae	Escherichia	Escherichia coli APEC O1	Pinarello	Healthy	0.0930549
AMP	MTG	frc	A0A377BTA6	Proteobacteria	Gammaproteobacteria	Enterobacterales	Enterobacteriaceae	Escherichia	Escherichia coli	Pivot	Healthy	0.253342
AMP	MTS	frc	O06644	Proteobacteria	Betaproteobacteria	Burkholderiales	Oxalobacteraceae	Oxalobacter	Oxalobacter formigenes	Pivot	Healthy	0.0837702
AMP	MTG	frc	A0A1B1SBJ2	Bacteroidetes	Bacteroidia	Bacteroidales	Muribaculaceae	Muribaculum	Muribaculum intestinale	Saint	Healthy	0.0588096
AMP	MTS	frc	C3X762	Proteobacteria	Betaproteobacteria	Burkholderiales	Oxalobacteraceae	Oxalobacter	Oxalobacter formigenes HOxBLS	Saint	Healthy	0.0214416
AMP	MTG	frc	A0A1B1SBJ2	Bacteroidetes	Bacteroidia	Bacteroidales	Muribaculaceae	Muribaculum	Muribaculum intestinale	SantaCruz	Healthy	2.74967
AMP	MTG	frc	A0A1Q6EIZ9	Bacteroidetes	Bacteroidia	Bacteroidales	NA	NA	Bacteroidales bacterium 52_46	SantaCruz	Healthy	0.245046
AMP	MTG	frc	A0A2V1IPP0	Bacteroidetes	Bacteroidia	Bacteroidales	Muribaculaceae	NA	Muribaculaceae bacterium DSM 103720	SantaCruz	Healthy	0.355611
AMP	MTG	frc	A0A2V1J0Z5	Bacteroidetes	Bacteroidia	Bacteroidales	Muribaculaceae	NA	Muribaculaceae bacterium DSM 100764	SantaCruz	Healthy	0.447601
AMP	MTG	frc	A0A377BTA6	Proteobacteria	Gammaproteobacteria	Enterobacterales	Enterobacteriaceae	Escherichia	Escherichia coli	SantaCruz	Healthy	0.13154
AMP	MTG	frc	A1ADQ1	Proteobacteria	Gammaproteobacteria	Enterobacterales	Enterobacteriaceae	Escherichia	Escherichia coli APEC O1	SantaCruz	Healthy	0.162686
AMP	MTG	frc	C3X762	Proteobacteria	Betaproteobacteria	Burkholderiales	Oxalobacteraceae	Oxalobacter	Oxalobacter formigenes HOxBLS	SantaCruz	Healthy	0.29643
AMP	MTG	frc	O06644	Proteobacteria	Betaproteobacteria	Burkholderiales	Oxalobacteraceae	Oxalobacter	Oxalobacter formigenes	SantaCruz	Healthy	0.0903568
AMP	MTG	frc	R5AXI8	Bacteroidetes	Bacteroidia	Bacteroidales	Bacteroidaceae	Bacteroides	Bacteroides sp. CAG:927	SantaCruz	Healthy	0.426207
AMP	MTS	frc	A0A1B1SBJ2	Bacteroidetes	Bacteroidia	Bacteroidales	Muribaculaceae	Muribaculum	Muribaculum intestinale	SantaCruz	Healthy	3.97437
AMP	MTS	frc	A0A2V1IPP0	Bacteroidetes	Bacteroidia	Bacteroidales	Muribaculaceae	NA	Muribaculaceae bacterium DSM 103720	SantaCruz	Healthy	1.1425
AMP	MTS	frc	A0A354HZG4	Bacteroidetes	Bacteroidia	Bacteroidales	Porphyromonadaceae	NA	Porphyromonadaceae bacterium	SantaCruz	Healthy	0.767411
AMP	MTS	frc	O06644	Proteobacteria	Betaproteobacteria	Burkholderiales	Oxalobacteraceae	Oxalobacter	Oxalobacter formigenes	SantaCruz	Healthy	0.290391
AMP	MTS	frc	R5AXI8	Bacteroidetes	Bacteroidia	Bacteroidales	Bacteroidaceae	Bacteroides	Bacteroides sp. CAG:927	SantaCruz	Healthy	1.22153
AMP	MTG	frc	A0A028EDB1	Proteobacteria	Gammaproteobacteria	Enterobacterales	Enterobacteriaceae	Escherichia	Escherichia coli O118:H16 str. 2009C-4446	Schwinn	Healthy	0.230644
AMP	MTG	frc	A0A0K4YN22	Proteobacteria	Gammaproteobacteria	Enterobacterales	Enterobacteriaceae	Escherichia	Escherichia coli	Schwinn	Healthy	0.221772
AMP	MTG	frc	A0A1B1SBJ2	Bacteroidetes	Bacteroidia	Bacteroidales	Muribaculaceae	Muribaculum	Muribaculum intestinale	Schwinn	Healthy	0.0795057
AMP	MTG	frc	A0A1Q6EIZ9	Bacteroidetes	Bacteroidia	Bacteroidales	NA	NA	Bacteroidales bacterium 52_46	Schwinn	Healthy	0.0798721
AMP	MTG	frc	A0A209AX82	Proteobacteria	Gammaproteobacteria	Enterobacterales	Yersiniaceae	Yersinia	Yersinia frederiksenii	Schwinn	Healthy	0.23345
AMP	MTG	frc	A0A2V1IPP0	Bacteroidetes	Bacteroidia	Bacteroidales	Muribaculaceae	NA	Muribaculaceae bacterium DSM 103720	Schwinn	Healthy	0.251243
AMP	MTG	frc	A0A2V1J0Z5	Bacteroidetes	Bacteroidia	Bacteroidales	Muribaculaceae	NA	Muribaculaceae bacterium DSM 100764	Schwinn	Healthy	0.227142
AMP	MTG	frc	A0A2X5G0L0	Proteobacteria	Gammaproteobacteria	Enterobacterales	Enterobacteriaceae	Escherichia	Escherichia coli	Schwinn	Healthy	0.168329
AMP	MTG	frc	A0A354HZG4	Bacteroidetes	Bacteroidia	Bacteroidales	Porphyromonadaceae	NA	Porphyromonadaceae bacterium	Schwinn	Healthy	0.394202
AMP	MTG	frc	A0A355Z7A2	Bacteroidetes	Bacteroidia	Bacteroidales	Porphyromonadaceae	NA	Porphyromonadaceae bacterium	Schwinn	Healthy	0.252209
AMP	MTG	frc	A0A369G9R5	Proteobacteria	Gammaproteobacteria	Enterobacterales	Enterobacteriaceae	Escherichia	Escherichia coli	Schwinn	Healthy	0.224543
AMP	MTG	frc	A0A377BTA6	Proteobacteria	Gammaproteobacteria	Enterobacterales	Enterobacteriaceae	Escherichia	Escherichia coli	Schwinn	Healthy	0.269378
AMP	MTG	frc	A1ADQ1	Proteobacteria	Gammaproteobacteria	Enterobacterales	Enterobacteriaceae	Escherichia	Escherichia coli APEC O1	Schwinn	Healthy	0.705644
AMP	MTG	frc	C3X762	Proteobacteria	Betaproteobacteria	Burkholderiales	Oxalobacteraceae	Oxalobacter	Oxalobacter formigenes HOxBLS	Schwinn	Healthy	0.232617
AMP	MTG	frc	O06644	Proteobacteria	Betaproteobacteria	Burkholderiales	Oxalobacteraceae	Oxalobacter	Oxalobacter formigenes	Schwinn	Healthy	0.149619
AMP	MTG	frc	Q8FFE8	Proteobacteria	Gammaproteobacteria	Enterobacterales	Enterobacteriaceae	Escherichia	Escherichia coli CFT073	Schwinn	Healthy	0.280281
AMP	MTG	frc	R5AR18	Bacteroidetes	Bacteroidia	Bacteroidales	Prevotellaceae	Prevotella	Prevotella sp. CAG:1031	Schwinn	Healthy	0.427824
AMP	MTS	frc	A0A1Q6EIZ9	Bacteroidetes	Bacteroidia	Bacteroidales	NA	NA	Bacteroidales bacterium 52_46	Schwinn	Healthy	0.18035
AMP	MTS	frc	A0A2V1IPP0	Bacteroidetes	Bacteroidia	Bacteroidales	Muribaculaceae	NA	Muribaculaceae bacterium DSM 103720	Schwinn	Healthy	0.179288
AMP	MTS	frc	C3X762	Proteobacteria	Betaproteobacteria	Burkholderiales	Oxalobacteraceae	Oxalobacter	Oxalobacter formigenes HOxBLS	Schwinn	Healthy	0.18394
AMP	MTS	frc	O06644	Proteobacteria	Betaproteobacteria	Burkholderiales	Oxalobacteraceae	Oxalobacter	Oxalobacter formigenes	Schwinn	Healthy	0.184132
AMP	MTG	frc	A0A377BTA6	Proteobacteria	Gammaproteobacteria	Enterobacterales	Enterobacteriaceae	Escherichia	Escherichia coli	Scott	Healthy	0.434281
AMP	MTG	frc	A1ADQ1	Proteobacteria	Gammaproteobacteria	Enterobacterales	Enterobacteriaceae	Escherichia	Escherichia coli APEC O1	Scott	Healthy	0.164987
AMP	MTG	frc	A0A1Q6EIZ9	Bacteroidetes	Bacteroidia	Bacteroidales	NA	NA	Bacteroidales bacterium 52_46	Speedplay	Healthy	1.42414
AMP	MTG	frc	A0A1Q6U8Z5	Proteobacteria	Alphaproteobacteria	Rhodospirillales	Rhodospirillaceae	Azospirillum	Azospirillum sp. 51_20	Speedplay	Healthy	0.0751096
AMP	MTG	frc	A0A2V1IPP0	Bacteroidetes	Bacteroidia	Bacteroidales	Muribaculaceae	NA	Muribaculaceae bacterium DSM 103720	Speedplay	Healthy	0.218595
AMP	MTG	frc	A0A2V1J0Z5	Bacteroidetes	Bacteroidia	Bacteroidales	Muribaculaceae	NA	Muribaculaceae bacterium DSM 100764	Speedplay	Healthy	0.256798
AMP	MTG	frc	A0A354HZG4	Bacteroidetes	Bacteroidia	Bacteroidales	Porphyromonadaceae	NA	Porphyromonadaceae bacterium	Speedplay	Healthy	0.220624
AMP	MTG	frc	A0A355Z7A2	Bacteroidetes	Bacteroidia	Bacteroidales	Porphyromonadaceae	NA	Porphyromonadaceae bacterium	Speedplay	Healthy	0.220113
AMP	MTG	frc	R5AR18	Bacteroidetes	Bacteroidia	Bacteroidales	Prevotellaceae	Prevotella	Prevotella sp. CAG:1031	Speedplay	Healthy	7.19709
AMP	MTG	frc	R5AXI8	Bacteroidetes	Bacteroidia	Bacteroidales	Bacteroidaceae	Bacteroides	Bacteroides sp. CAG:927	Speedplay	Healthy	0.0367706
AMP	MTS	frc	A0A087ADU5	Actinobacteria	Actinobacteria	Bifidobacteriales	Bifidobacteriaceae	Bifidobacterium	Bifidobacterium choerinum	Speedplay	Healthy	0.0346603
AMP	MTS	frc	A0A0L7BLA3	Actinobacteria	Actinobacteria	Bifidobacteriales	Bifidobacteriaceae	Bifidobacterium	Bifidobacterium animalis subsp. animalis MCC 0483	Speedplay	Healthy	0.0347386
AMP	MTS	frc	A0A248X7K1	Actinobacteria	Actinobacteria	Bifidobacteriales	Bifidobacteriaceae	Bifidobacterium	Bifidobacterium pseudolongum	Speedplay	Healthy	0.0693207
AMP	MTS	frc	C3X762	Proteobacteria	Betaproteobacteria	Burkholderiales	Oxalobacteraceae	Oxalobacter	Oxalobacter formigenes HOxBLS	Speedplay	Healthy	0.435543
AMP	MTS	frc	O06644	Proteobacteria	Betaproteobacteria	Burkholderiales	Oxalobacteraceae	Oxalobacter	Oxalobacter formigenes	Speedplay	Healthy	0.17978
AMP	MTG	frc	A0A072MW66	Actinobacteria	Actinobacteria	Bifidobacteriales	Bifidobacteriaceae	Bifidobacterium	Bifidobacterium pseudocatenulatum IPLA36007	SRAM	Healthy	0.0301301
AMP	MTG	frc	A0A1Q6EIZ9	Bacteroidetes	Bacteroidia	Bacteroidales	NA	NA	Bacteroidales bacterium 52_46	SRAM	Healthy	0.149956
AMP	MTG	frc	A0A2V1IPP0	Bacteroidetes	Bacteroidia	Bacteroidales	Muribaculaceae	NA	Muribaculaceae bacterium DSM 103720	SRAM	Healthy	0.987436
AMP	MTG	frc	A0A2V1J0Z5	Bacteroidetes	Bacteroidia	Bacteroidales	Muribaculaceae	NA	Muribaculaceae bacterium DSM 100764	SRAM	Healthy	0.753252
AMP	MTG	frc	A0A354HZG4	Bacteroidetes	Bacteroidia	Bacteroidales	Porphyromonadaceae	NA	Porphyromonadaceae bacterium	SRAM	Healthy	1.1476
AMP	MTG	frc	A0A355Z7A2	Bacteroidetes	Bacteroidia	Bacteroidales	Porphyromonadaceae	NA	Porphyromonadaceae bacterium	SRAM	Healthy	1.86807
AMP	MTG	frc	A1ADQ1	Proteobacteria	Gammaproteobacteria	Enterobacterales	Enterobacteriaceae	Escherichia	Escherichia coli APEC O1	SRAM	Healthy	0.125156
AMP	MTG	frc	C3X762	Proteobacteria	Betaproteobacteria	Burkholderiales	Oxalobacteraceae	Oxalobacter	Oxalobacter formigenes HOxBLS	SRAM	Healthy	0.153493
AMP	MTG	frc	O06644	Proteobacteria	Betaproteobacteria	Burkholderiales	Oxalobacteraceae	Oxalobacter	Oxalobacter formigenes	SRAM	Healthy	0.121647
AMP	MTG	frc	R5AR18	Bacteroidetes	Bacteroidia	Bacteroidales	Prevotellaceae	Prevotella	Prevotella sp. CAG:1031	SRAM	Healthy	0.179122
AMP	MTG	frc	R5AXI8	Bacteroidetes	Bacteroidia	Bacteroidales	Bacteroidaceae	Bacteroides	Bacteroides sp. CAG:927	SRAM	Healthy	0.8758
AMP	MTS	frc	A0A1B1SBJ2	Bacteroidetes	Bacteroidia	Bacteroidales	Muribaculaceae	Muribaculum	Muribaculum intestinale	SRAM	Healthy	0.0522078
AMP	MTS	frc	A0A1Q6EIZ9	Bacteroidetes	Bacteroidia	Bacteroidales	NA	NA	Bacteroidales bacterium 52_46	SRAM	Healthy	0.183569
AMP	MTS	frc	A0A2V1IPP0	Bacteroidetes	Bacteroidia	Bacteroidales	Muribaculaceae	NA	Muribaculaceae bacterium DSM 103720	SRAM	Healthy	0.392458
AMP	MTS	frc	A0A2V1J0Z5	Bacteroidetes	Bacteroidia	Bacteroidales	Muribaculaceae	NA	Muribaculaceae bacterium DSM 100764	SRAM	Healthy	0.368838
AMP	MTS	frc	A0A354HZG4	Bacteroidetes	Bacteroidia	Bacteroidales	Porphyromonadaceae	NA	Porphyromonadaceae bacterium	SRAM	Healthy	0.792201
AMP	MTS	frc	A0A355Z7A2	Bacteroidetes	Bacteroidia	Bacteroidales	Porphyromonadaceae	NA	Porphyromonadaceae bacterium	SRAM	Healthy	1.10651
AMP	MTS	frc	C3X762	Proteobacteria	Betaproteobacteria	Burkholderiales	Oxalobacteraceae	Oxalobacter	Oxalobacter formigenes HOxBLS	SRAM	Healthy	2.22794
AMP	MTS	frc	O06644	Proteobacteria	Betaproteobacteria	Burkholderiales	Oxalobacteraceae	Oxalobacter	Oxalobacter formigenes	SRAM	Healthy	2.63259
AMP	MTS	frc	R5AXI8	Bacteroidetes	Bacteroidia	Bacteroidales	Bacteroidaceae	Bacteroides	Bacteroides sp. CAG:927	SRAM	Healthy	0.264067
AMP	MTG	frc	A0A087ADU5	Actinobacteria	Actinobacteria	Bifidobacteriales	Bifidobacteriaceae	Bifidobacterium	Bifidobacterium choerinum	Thomson	Healthy	0.0919602
AMP	MTG	frc	A0A0L7BLA3	Actinobacteria	Actinobacteria	Bifidobacteriales	Bifidobacteriaceae	Bifidobacterium	Bifidobacterium animalis subsp. animalis MCC 0483	Thomson	Healthy	0.0921678
AMP	MTG	frc	A0A248X7K1	Actinobacteria	Actinobacteria	Bifidobacteriales	Bifidobacteriaceae	Bifidobacterium	Bifidobacterium pseudolongum	Thomson	Healthy	0.0306534
AMP	MTG	frc	A0A2A2EHW6	Actinobacteria	Actinobacteria	Bifidobacteriales	Bifidobacteriaceae	Bifidobacterium	Bifidobacterium criceti	Thomson	Healthy	0.0305159
AMP	MTG	frc	C3X762	Proteobacteria	Betaproteobacteria	Burkholderiales	Oxalobacteraceae	Oxalobacter	Oxalobacter formigenes HOxBLS	Thomson	Healthy	0.320993
AMP	MTG	frc	O06644	Proteobacteria	Betaproteobacteria	Burkholderiales	Oxalobacteraceae	Oxalobacter	Oxalobacter formigenes	Thomson	Healthy	0.0635986
AMP	MTG	frc	R9WHI8	Firmicutes	Bacilli	Lactobacillales	Lactobacillaceae	Lactobacillus	Lactobacillus reuteri I5007	Thomson	Healthy	0.0382306
AMP	MTS	frc	C3X762	Proteobacteria	Betaproteobacteria	Burkholderiales	Oxalobacteraceae	Oxalobacter	Oxalobacter formigenes HOxBLS	Thomson	Healthy	1.15458
AMP	MTS	frc	O06644	Proteobacteria	Betaproteobacteria	Burkholderiales	Oxalobacteraceae	Oxalobacter	Oxalobacter formigenes	Thomson	Healthy	0.299564
AMP	MTG	frc	A0A377BTA6	Proteobacteria	Gammaproteobacteria	Enterobacterales	Enterobacteriaceae	Escherichia	Escherichia coli	Trek	Healthy	0.038444
AMP	MTG	frc	A1ADQ1	Proteobacteria	Gammaproteobacteria	Enterobacterales	Enterobacteriaceae	Escherichia	Escherichia coli APEC O1	Trek	Healthy	0.0407544
AMP	MTS	frc	A0A354HZG4	Bacteroidetes	Bacteroidia	Bacteroidales	Porphyromonadaceae	NA	Porphyromonadaceae bacterium	Yeti	Healthy	0.0158776
AMP	MTS	frc	R5AXI8	Bacteroidetes	Bacteroidia	Bacteroidales	Bacteroidaceae	Bacteroides	Bacteroides sp. CAG:927	Yeti	Healthy	0.0158776
AMP	MTS	frc	R9KTQ7	Actinobacteria	Coriobacteriia	Eggerthellales	Eggerthellaceae	Enterorhabdus	Enterorhabdus caecimuris B7	Yeti	Healthy	0.0150401
AMP	MTG	frc	C3X762	Proteobacteria	Betaproteobacteria	Burkholderiales	Oxalobacteraceae	Oxalobacter	Oxalobacter formigenes HOxBLS	Zipp	Healthy	0.105786
AMP	MTG	frc	O06644	Proteobacteria	Betaproteobacteria	Burkholderiales	Oxalobacteraceae	Oxalobacter	Oxalobacter formigenes	Zipp	Healthy	0.0349325
AMP	MTS	frc	A1ADQ1	Proteobacteria	Gammaproteobacteria	Enterobacterales	Enterobacteriaceae	Escherichia	Escherichia coli APEC O1	Zipp	Healthy	0.0959683
AMP	MTS	frc	C3X762	Proteobacteria	Betaproteobacteria	Burkholderiales	Oxalobacteraceae	Oxalobacter	Oxalobacter formigenes HOxBLS	Zipp	Healthy	0.972962
AMP	MTS	frc	O06644	Proteobacteria	Betaproteobacteria	Burkholderiales	Oxalobacteraceae	Oxalobacter	Oxalobacter formigenes	Zipp	Healthy	0.24874
fran	MTG	frc	A0A1B1SBJ2	Bacteroidetes	Bacteroidia	Bacteroidales	Muribaculaceae	Muribaculum	Muribaculum intestinale	X310763260	Healthy	2.96021
fran	MTG	frc	A0A1Q6EIZ9	Bacteroidetes	Bacteroidia	Bacteroidales	NA	NA	Bacteroidales bacterium 52_46	X310763260	Healthy	2.00645
fran	MTG	frc	A0A2V1IPP0	Bacteroidetes	Bacteroidia	Bacteroidales	Muribaculaceae	NA	Muribaculaceae bacterium DSM 103720	X310763260	Healthy	0.464713
fran	MTG	frc	A0A2V1J0Z5	Bacteroidetes	Bacteroidia	Bacteroidales	Muribaculaceae	NA	Muribaculaceae bacterium DSM 100764	X310763260	Healthy	4.10348
fran	MTG	frc	A0A354HZG4	Bacteroidetes	Bacteroidia	Bacteroidales	Porphyromonadaceae	NA	Porphyromonadaceae bacterium	X310763260	Healthy	4.25731
fran	MTG	frc	A0A355Z7A2	Bacteroidetes	Bacteroidia	Bacteroidales	Porphyromonadaceae	NA	Porphyromonadaceae bacterium	X310763260	Healthy	2.59167
fran	MTG	frc	A1ADQ1	Proteobacteria	Gammaproteobacteria	Enterobacterales	Enterobacteriaceae	Escherichia	Escherichia coli APEC O1	X310763260	Healthy	0.0747597
fran	MTG	frc	R5AR18	Bacteroidetes	Bacteroidia	Bacteroidales	Prevotellaceae	Prevotella	Prevotella sp. CAG:1031	X310763260	Healthy	1.17695
fran	MTG	frc	R5AXI8	Bacteroidetes	Bacteroidia	Bacteroidales	Bacteroidaceae	Bacteroides	Bacteroides sp. CAG:927	X310763260	Healthy	4.97889
fran	MTS	frc	A0A1B1SBJ2	Bacteroidetes	Bacteroidia	Bacteroidales	Muribaculaceae	Muribaculum	Muribaculum intestinale	X310763260	Healthy	8.04092
fran	MTS	frc	A0A1Q6EIZ9	Bacteroidetes	Bacteroidia	Bacteroidales	NA	NA	Bacteroidales bacterium 52_46	X310763260	Healthy	1.49879
fran	MTS	frc	A0A2S8JKC0	Proteobacteria	Gammaproteobacteria	Enterobacterales	Enterobacteriaceae	Escherichia	Escherichia coli	X310763260	Healthy	0.0851066
fran	MTS	frc	A0A2V1IPP0	Bacteroidetes	Bacteroidia	Bacteroidales	Muribaculaceae	NA	Muribaculaceae bacterium DSM 103720	X310763260	Healthy	0.526873
fran	MTS	frc	A0A2V1J0Z5	Bacteroidetes	Bacteroidia	Bacteroidales	Muribaculaceae	NA	Muribaculaceae bacterium DSM 100764	X310763260	Healthy	9.45373
fran	MTS	frc	A0A354HZG4	Bacteroidetes	Bacteroidia	Bacteroidales	Porphyromonadaceae	NA	Porphyromonadaceae bacterium	X310763260	Healthy	8.53274
fran	MTS	frc	A0A355Z7A2	Bacteroidetes	Bacteroidia	Bacteroidales	Porphyromonadaceae	NA	Porphyromonadaceae bacterium	X310763260	Healthy	7.04823
fran	MTS	frc	A0A377BTA6	Proteobacteria	Gammaproteobacteria	Enterobacterales	Enterobacteriaceae	Escherichia	Escherichia coli	X310763260	Healthy	1.95967
fran	MTS	frc	A1ADQ1	Proteobacteria	Gammaproteobacteria	Enterobacterales	Enterobacteriaceae	Escherichia	Escherichia coli APEC O1	X310763260	Healthy	2.70898
fran	MTS	frc	R5AR18	Bacteroidetes	Bacteroidia	Bacteroidales	Prevotellaceae	Prevotella	Prevotella sp. CAG:1031	X310763260	Healthy	2.13982
fran	MTS	frc	R5AXI8	Bacteroidetes	Bacteroidia	Bacteroidales	Bacteroidaceae	Bacteroides	Bacteroides sp. CAG:927	X310763260	Healthy	7.96774
fran	MTG	frc	A0A1B1SBJ2	Bacteroidetes	Bacteroidia	Bacteroidales	Muribaculaceae	Muribaculum	Muribaculum intestinale	X311245214	Healthy	0.0326591
fran	MTG	frc	A0A1Q6U8Z5	Proteobacteria	Alphaproteobacteria	Rhodospirillales	Rhodospirillaceae	Azospirillum	Azospirillum sp. 51_20	X311245214	Healthy	0.269941
fran	MTG	frc	A0A354HZG4	Bacteroidetes	Bacteroidia	Bacteroidales	Porphyromonadaceae	NA	Porphyromonadaceae bacterium	X311245214	Healthy	0.198228
fran	MTG	frc	A0A355Z7A2	Bacteroidetes	Bacteroidia	Bacteroidales	Porphyromonadaceae	NA	Porphyromonadaceae bacterium	X311245214	Healthy	0.0329615
fran	MTG	frc	A1ADQ1	Proteobacteria	Gammaproteobacteria	Enterobacterales	Enterobacteriaceae	Escherichia	Escherichia coli APEC O1	X311245214	Healthy	0.47921
fran	MTG	frc	C3X762	Proteobacteria	Betaproteobacteria	Burkholderiales	Oxalobacteraceae	Oxalobacter	Oxalobacter formigenes HOxBLS	X311245214	Healthy	0.0335835
fran	MTG	frc	O06644	Proteobacteria	Betaproteobacteria	Burkholderiales	Oxalobacteraceae	Oxalobacter	Oxalobacter formigenes	X311245214	Healthy	0.0665392
fran	MTG	frc	R5AR18	Bacteroidetes	Bacteroidia	Bacteroidales	Prevotellaceae	Prevotella	Prevotella sp. CAG:1031	X311245214	Healthy	0.0326591
fran	MTG	frc	R5AXI8	Bacteroidetes	Bacteroidia	Bacteroidales	Bacteroidaceae	Bacteroides	Bacteroides sp. CAG:927	X311245214	Healthy	0.066076
fran	MTS	frc	A0A1B1SBJ2	Bacteroidetes	Bacteroidia	Bacteroidales	Muribaculaceae	Muribaculum	Muribaculum intestinale	X311245214	Healthy	0.0766868
fran	MTS	frc	A0A2V1J0Z5	Bacteroidetes	Bacteroidia	Bacteroidales	Muribaculaceae	NA	Muribaculaceae bacterium DSM 100764	X311245214	Healthy	0.0779214
fran	MTS	frc	A0A377BTA6	Proteobacteria	Gammaproteobacteria	Enterobacterales	Enterobacteriaceae	Escherichia	Escherichia coli	X311245214	Healthy	0.799679
fran	MTS	frc	A1ADQ1	Proteobacteria	Gammaproteobacteria	Enterobacterales	Enterobacteriaceae	Escherichia	Escherichia coli APEC O1	X311245214	Healthy	0.929745
fran	MTS	frc	C3X762	Proteobacteria	Betaproteobacteria	Burkholderiales	Oxalobacteraceae	Oxalobacter	Oxalobacter formigenes HOxBLS	X311245214	Healthy	0.913271
fran	MTS	frc	H1RYM1	Proteobacteria	Betaproteobacteria	Burkholderiales	Burkholderiaceae	Cupriavidus	Cupriavidus basilensis OR16	X311245214	Healthy	0.0398041
fran	MTS	frc	O06644	Proteobacteria	Betaproteobacteria	Burkholderiales	Oxalobacteraceae	Oxalobacter	Oxalobacter formigenes	X311245214	Healthy	0.511488
fran	MTG	frc	A0A072MW66	Actinobacteria	Actinobacteria	Bifidobacteriales	Bifidobacteriaceae	Bifidobacterium	Bifidobacterium pseudocatenulatum IPLA36007	X316192082	Healthy	0.0290568
fran	MTG	frc	A0A1B1SBJ2	Bacteroidetes	Bacteroidia	Bacteroidales	Muribaculaceae	Muribaculum	Muribaculum intestinale	X316192082	Healthy	0.0863705
fran	MTG	frc	A0A1Q6EIZ9	Bacteroidetes	Bacteroidia	Bacteroidales	NA	NA	Bacteroidales bacterium 52_46	X316192082	Healthy	0.0867685
fran	MTG	frc	A0A2V1J0Z5	Bacteroidetes	Bacteroidia	Bacteroidales	Muribaculaceae	NA	Muribaculaceae bacterium DSM 100764	X316192082	Healthy	0.0581135
fran	MTG	frc	A0A354HZG4	Bacteroidetes	Bacteroidia	Bacteroidales	Porphyromonadaceae	NA	Porphyromonadaceae bacterium	X316192082	Healthy	0.0291242
fran	MTG	frc	A0A355Z7A2	Bacteroidetes	Bacteroidia	Bacteroidales	Porphyromonadaceae	NA	Porphyromonadaceae bacterium	X316192082	Healthy	0.0581135
fran	MTG	frc	A1ADQ1	Proteobacteria	Gammaproteobacteria	Enterobacterales	Enterobacteriaceae	Escherichia	Escherichia coli APEC O1	X316192082	Healthy	0.120697
fran	MTG	frc	C3X2D4	Proteobacteria	Betaproteobacteria	Burkholderiales	Oxalobacteraceae	Oxalobacter	Oxalobacter formigenes HOxBLS	X316192082	Healthy	0.0297453
fran	MTG	frc	C3X762	Proteobacteria	Betaproteobacteria	Burkholderiales	Oxalobacteraceae	Oxalobacter	Oxalobacter formigenes HOxBLS	X316192082	Healthy	0.029605
fran	MTG	frc	D1NS91	Actinobacteria	Actinobacteria	Bifidobacteriales	Bifidobacteriaceae	Bifidobacterium	Bifidobacterium gallicum DSM 20093 = LMG 11596	X316192082	Healthy	0.0286587
fran	MTG	frc	R5AXI8	Bacteroidetes	Bacteroidia	Bacteroidales	Bacteroidaceae	Bacteroides	Bacteroides sp. CAG:927	X316192082	Healthy	0.0873725
fran	MTS	frc	A0A1B1SBJ2	Bacteroidetes	Bacteroidia	Bacteroidales	Muribaculaceae	Muribaculum	Muribaculum intestinale	X316192082	Healthy	0.0840605
fran	MTS	frc	A0A355Z7A2	Bacteroidetes	Bacteroidia	Bacteroidales	Porphyromonadaceae	NA	Porphyromonadaceae bacterium	X316192082	Healthy	0.0848389
fran	MTS	frc	A0A377BTA6	Proteobacteria	Gammaproteobacteria	Enterobacterales	Enterobacteriaceae	Escherichia	Escherichia coli	X316192082	Healthy	0.209398
fran	MTS	frc	A1ADQ1	Proteobacteria	Gammaproteobacteria	Enterobacterales	Enterobacteriaceae	Escherichia	Escherichia coli APEC O1	X316192082	Healthy	0.445692
fran	MTS	frc	C3X2D4	Proteobacteria	Betaproteobacteria	Burkholderiales	Oxalobacteraceae	Oxalobacter	Oxalobacter formigenes HOxBLS	X316192082	Healthy	0.918729
fran	MTS	frc	C3X762	Proteobacteria	Betaproteobacteria	Burkholderiales	Oxalobacteraceae	Oxalobacter	Oxalobacter formigenes HOxBLS	X316192082	Healthy	5.56434
fran	MTS	frc	O06644	Proteobacteria	Betaproteobacteria	Burkholderiales	Oxalobacteraceae	Oxalobacter	Oxalobacter formigenes	X316192082	Healthy	0.0861915
fran	MTS	frc	R5AXI8	Bacteroidetes	Bacteroidia	Bacteroidales	Bacteroidaceae	Bacteroides	Bacteroides sp. CAG:927	X316192082	Healthy	0.0861474
fran	MTG	frc	A0A1Q6U8Z5	Proteobacteria	Alphaproteobacteria	Rhodospirillales	Rhodospirillaceae	Azospirillum	Azospirillum sp. 51_20	X316701492	Healthy	0.0361787
fran	MTG	frc	A0A377BTA6	Proteobacteria	Gammaproteobacteria	Enterobacterales	Enterobacteriaceae	Escherichia	Escherichia coli	X316701492	Healthy	0.03462
fran	MTG	frc	A1ADQ1	Proteobacteria	Gammaproteobacteria	Enterobacterales	Enterobacteriaceae	Escherichia	Escherichia coli APEC O1	X316701492	Healthy	0.0367005
fran	MTS	frc	A0A377BTA6	Proteobacteria	Gammaproteobacteria	Enterobacterales	Enterobacteriaceae	Escherichia	Escherichia coli	X316701492	Healthy	1.02171
fran	MTS	frc	A1ADQ1	Proteobacteria	Gammaproteobacteria	Enterobacterales	Enterobacteriaceae	Escherichia	Escherichia coli APEC O1	X316701492	Healthy	1.12173
fran	MTG	frc	A0A087ADU5	Actinobacteria	Actinobacteria	Bifidobacteriales	Bifidobacteriaceae	Bifidobacterium	Bifidobacterium choerinum	X317690558	Healthy	0.0287883
fran	MTG	frc	A0A0R1UNQ7	Firmicutes	Bacilli	Lactobacillales	Lactobacillaceae	Lactobacillus	Lactobacillus equigenerosi DSM 18793 = JCM 14505	X317690558	Healthy	0.0575765
fran	MTG	frc	A0A1B1SBJ2	Bacteroidetes	Bacteroidia	Bacteroidales	Muribaculaceae	Muribaculum	Muribaculum intestinale	X317690558	Healthy	0.0879495
fran	MTG	frc	A0A1Q6EIZ9	Bacteroidetes	Bacteroidia	Bacteroidales	NA	NA	Bacteroidales bacterium 52_46	X317690558	Healthy	0.206161
fran	MTG	frc	A0A1Q6U8Z5	Proteobacteria	Alphaproteobacteria	Rhodospirillales	Rhodospirillaceae	Azospirillum	Azospirillum sp. 51_20	X317690558	Healthy	0.151445
fran	MTG	frc	A0A2V1IPP0	Bacteroidetes	Bacteroidia	Bacteroidales	Muribaculaceae	NA	Muribaculaceae bacterium DSM 103720	X317690558	Healthy	0.499526
fran	MTG	frc	A0A2V1J0Z5	Bacteroidetes	Bacteroidia	Bacteroidales	Muribaculaceae	NA	Muribaculaceae bacterium DSM 100764	X317690558	Healthy	0.976402
fran	MTG	frc	A0A354HZG4	Bacteroidetes	Bacteroidia	Bacteroidales	Porphyromonadaceae	NA	Porphyromonadaceae bacterium	X317690558	Healthy	0.741415
fran	MTG	frc	A0A355Z7A2	Bacteroidetes	Bacteroidia	Bacteroidales	Porphyromonadaceae	NA	Porphyromonadaceae bacterium	X317690558	Healthy	0.384643
fran	MTG	frc	A1ADQ1	Proteobacteria	Gammaproteobacteria	Enterobacterales	Enterobacteriaceae	Escherichia	Escherichia coli APEC O1	X317690558	Healthy	0.0307259
fran	MTG	frc	C3X762	Proteobacteria	Betaproteobacteria	Burkholderiales	Oxalobacteraceae	Oxalobacter	Oxalobacter formigenes HOxBLS	X317690558	Healthy	0.211023
fran	MTG	frc	O06644	Proteobacteria	Betaproteobacteria	Burkholderiales	Oxalobacteraceae	Oxalobacter	Oxalobacter formigenes	X317690558	Healthy	0.0597289
fran	MTG	frc	R5AXI8	Bacteroidetes	Bacteroidia	Bacteroidales	Bacteroidaceae	Bacteroides	Bacteroides sp. CAG:927	X317690558	Healthy	0.355879
fran	MTS	frc	A0A1B1SBJ2	Bacteroidetes	Bacteroidia	Bacteroidales	Muribaculaceae	Muribaculum	Muribaculum intestinale	X317690558	Healthy	0.179676
fran	MTS	frc	A0A1F4IAS5	Proteobacteria	Betaproteobacteria	Burkholderiales	NA	NA	Burkholderiales bacterium RIFCSPHIGHO2_12_FULL_61_	X317690558	Healthy	0.46873
fran	MTS	frc	A0A1Q6EIZ9	Bacteroidetes	Bacteroidia	Bacteroidales	NA	NA	Bacteroidales bacterium 52_46	X317690558	Healthy	0.182854
fran	MTS	frc	A0A239KMS3	Actinobacteria	Actinobacteria	Streptomycetales	Streptomycetaceae	Streptomyces	Streptomyces glauciniger	X317690558	Healthy	0.097679
fran	MTS	frc	A0A2V1IPP0	Bacteroidetes	Bacteroidia	Bacteroidales	Muribaculaceae	NA	Muribaculaceae bacterium DSM 103720	X317690558	Healthy	0.40813
fran	MTS	frc	A0A2V1J0Z5	Bacteroidetes	Bacteroidia	Bacteroidales	Muribaculaceae	NA	Muribaculaceae bacterium DSM 100764	X317690558	Healthy	0.547559
fran	MTS	frc	A0A2W5RAA1	Proteobacteria	Alphaproteobacteria	Rhizobiales	Xanthobacteraceae	Starkeya	Starkeya novella	X317690558	Healthy	0.093363
fran	MTS	frc	A0A354HZG4	Bacteroidetes	Bacteroidia	Bacteroidales	Porphyromonadaceae	NA	Porphyromonadaceae bacterium	X317690558	Healthy	0.41251
fran	MTS	frc	A0A355Z7A2	Bacteroidetes	Bacteroidia	Bacteroidales	Porphyromonadaceae	NA	Porphyromonadaceae bacterium	X317690558	Healthy	0.27496
fran	MTS	frc	A0A377BTA6	Proteobacteria	Gammaproteobacteria	Enterobacterales	Enterobacteriaceae	Escherichia	Escherichia coli	X317690558	Healthy	0.403734
fran	MTS	frc	A1ADQ1	Proteobacteria	Gammaproteobacteria	Enterobacterales	Enterobacteriaceae	Escherichia	Escherichia coli APEC O1	X317690558	Healthy	0.519089
fran	MTS	frc	C3X762	Proteobacteria	Betaproteobacteria	Burkholderiales	Oxalobacteraceae	Oxalobacter	Oxalobacter formigenes HOxBLS	X317690558	Healthy	7.24356
fran	MTS	frc	O06644	Proteobacteria	Betaproteobacteria	Burkholderiales	Oxalobacteraceae	Oxalobacter	Oxalobacter formigenes	X317690558	Healthy	4.78927
fran	MTS	frc	R5AXI8	Bacteroidetes	Bacteroidia	Bacteroidales	Bacteroidaceae	Bacteroides	Bacteroides sp. CAG:927	X317690558	Healthy	0.18176
fran	MTG	frc	A1ADQ1	Proteobacteria	Gammaproteobacteria	Enterobacterales	Enterobacteriaceae	Escherichia	Escherichia coli APEC O1	X317802115	Healthy	0.514908
fran	MTS	frc	A0A087ADU5	Actinobacteria	Actinobacteria	Bifidobacteriales	Bifidobacteriaceae	Bifidobacterium	Bifidobacterium choerinum	X317802115	Healthy	0.150027
fran	MTS	frc	A0A087B567	Actinobacteria	Actinobacteria	Bifidobacteriales	Bifidobacteriaceae	Bifidobacterium	Bifidobacterium cuniculi	X317802115	Healthy	0.0751826
fran	MTS	frc	A0A1I1DW84	Proteobacteria	Alphaproteobacteria	Rhizobiales	Bradyrhizobiaceae	Bosea	Bosea sp. DSM 18164	X317802115	Healthy	0.0785516
fran	MTS	frc	A0A2V1J0Z5	Bacteroidetes	Bacteroidia	Bacteroidales	Muribaculaceae	NA	Muribaculaceae bacterium DSM 100764	X317802115	Healthy	0.077097
fran	MTS	frc	A0A377BTA6	Proteobacteria	Gammaproteobacteria	Enterobacterales	Enterobacteriaceae	Escherichia	Escherichia coli	X317802115	Healthy	3.31094
fran	MTS	frc	A1ADQ1	Proteobacteria	Gammaproteobacteria	Enterobacterales	Enterobacteriaceae	Escherichia	Escherichia coli APEC O1	X317802115	Healthy	5.38098
fran	MTS	frc	A7IEQ2	Proteobacteria	Alphaproteobacteria	Rhizobiales	Xanthobacteraceae	Xanthobacter	Xanthobacter autotrophicus Py2	X317802115	Healthy	0.0814325
fran	MTS	frc	B3QBS6	Proteobacteria	Alphaproteobacteria	Rhizobiales	Bradyrhizobiaceae	Rhodopseudomonas	Rhodopseudomonas palustris TIE-1	X317802115	Healthy	0.0783668
fran	MTS	frc	C3X762	Proteobacteria	Betaproteobacteria	Burkholderiales	Oxalobacteraceae	Oxalobacter	Oxalobacter formigenes HOxBLS	X317802115	Healthy	0.0785516
fran	MTS	frc	O06644	Proteobacteria	Betaproteobacteria	Burkholderiales	Oxalobacteraceae	Oxalobacter	Oxalobacter formigenes	X317802115	Healthy	0.0771438
fran	MTG	frc	A0A1B1SBJ2	Bacteroidetes	Bacteroidia	Bacteroidales	Muribaculaceae	Muribaculum	Muribaculum intestinale	X317822438	Healthy	0.0334313
fran	MTG	frc	A0A1Q6EIZ9	Bacteroidetes	Bacteroidia	Bacteroidales	NA	NA	Bacteroidales bacterium 52_46	X317822438	Healthy	0.100756
fran	MTG	frc	A0A2V1IPP0	Bacteroidetes	Bacteroidia	Bacteroidales	Muribaculaceae	NA	Muribaculaceae bacterium DSM 103720	X317822438	Healthy	0.134033
fran	MTG	frc	A0A2V1J0Z5	Bacteroidetes	Bacteroidia	Bacteroidales	Muribaculaceae	NA	Muribaculaceae bacterium DSM 100764	X317822438	Healthy	0.134963
fran	MTG	frc	A0A354HZG4	Bacteroidetes	Bacteroidia	Bacteroidales	Porphyromonadaceae	NA	Porphyromonadaceae bacterium	X317822438	Healthy	0.0338191
fran	MTG	frc	A0A355Z7A2	Bacteroidetes	Bacteroidia	Bacteroidales	Porphyromonadaceae	NA	Porphyromonadaceae bacterium	X317822438	Healthy	0.101223
fran	MTG	frc	A0A377BTA6	Proteobacteria	Gammaproteobacteria	Enterobacterales	Enterobacteriaceae	Escherichia	Escherichia coli	X317822438	Healthy	0.0661045
fran	MTG	frc	G1U9U4	Firmicutes	Bacilli	Lactobacillales	Lactobacillaceae	Lactobacillus	Lactobacillus acidophilus	X317822438	Healthy	0.0327552
fran	MTS	frc	A0A0R1UNQ7	Firmicutes	Bacilli	Lactobacillales	Lactobacillaceae	Lactobacillus	Lactobacillus equigenerosi DSM 18793 = JCM 14505	X317822438	Healthy	0.072026
fran	MTS	frc	A0A1B1SBJ2	Bacteroidetes	Bacteroidia	Bacteroidales	Muribaculaceae	Muribaculum	Muribaculum intestinale	X317822438	Healthy	0.0733476
fran	MTS	frc	A0A1Q6EIZ9	Bacteroidetes	Bacteroidia	Bacteroidales	NA	NA	Bacteroidales bacterium 52_46	X317822438	Healthy	0.0736856
fran	MTS	frc	A0A2V1IPP0	Bacteroidetes	Bacteroidia	Bacteroidales	Muribaculaceae	NA	Muribaculaceae bacterium DSM 103720	X317822438	Healthy	0.18485
fran	MTS	frc	A0A354HZG4	Bacteroidetes	Bacteroidia	Bacteroidales	Porphyromonadaceae	NA	Porphyromonadaceae bacterium	X317822438	Healthy	0.223664
fran	MTS	frc	A0A355Z7A2	Bacteroidetes	Bacteroidia	Bacteroidales	Porphyromonadaceae	NA	Porphyromonadaceae bacterium	X317822438	Healthy	0.22208
fran	MTS	frc	A0A377BTA6	Proteobacteria	Gammaproteobacteria	Enterobacterales	Enterobacteriaceae	Escherichia	Escherichia coli	X317822438	Healthy	1.53851
fran	MTS	frc	A1ADQ1	Proteobacteria	Gammaproteobacteria	Enterobacterales	Enterobacteriaceae	Escherichia	Escherichia coli APEC O1	X317822438	Healthy	1.19985
fran	MTS	frc	O06644	Proteobacteria	Betaproteobacteria	Burkholderiales	Oxalobacteraceae	Oxalobacter	Oxalobacter formigenes	X317822438	Healthy	0.0752568
fran	MTG	frc	A0A2V1J0Z5	Bacteroidetes	Bacteroidia	Bacteroidales	Muribaculaceae	NA	Muribaculaceae bacterium DSM 100764	X319146421	Healthy	0.0332096
fran	MTG	frc	A1ADQ1	Proteobacteria	Gammaproteobacteria	Enterobacterales	Enterobacteriaceae	Escherichia	Escherichia coli APEC O1	X319146421	Healthy	0.0689738
fran	MTG	frc	C3X762	Proteobacteria	Betaproteobacteria	Burkholderiales	Oxalobacteraceae	Oxalobacter	Oxalobacter formigenes HOxBLS	X319146421	Healthy	0.0338362
fran	MTS	frc	A0A1B1SBJ2	Bacteroidetes	Bacteroidia	Bacteroidales	Muribaculaceae	Muribaculum	Muribaculum intestinale	X319146421	Healthy	0.0734156
fran	MTS	frc	A0A1F3ZN52	Proteobacteria	Betaproteobacteria	NA	NA	NA	Betaproteobacteria bacterium RIFCSPLOWO2_02_FULL_6	X319146421	Healthy	0.0754934
fran	MTS	frc	A0A1F4IAS5	Proteobacteria	Betaproteobacteria	Burkholderiales	NA	NA	Burkholderiales bacterium RIFCSPHIGHO2_12_FULL_61_	X319146421	Healthy	0.574978
fran	MTS	frc	A0A377BTA6	Proteobacteria	Gammaproteobacteria	Enterobacterales	Enterobacteriaceae	Escherichia	Escherichia coli	X319146421	Healthy	2.88101
fran	MTS	frc	A1ADQ1	Proteobacteria	Gammaproteobacteria	Enterobacterales	Enterobacteriaceae	Escherichia	Escherichia coli APEC O1	X319146421	Healthy	5.41654
fran	MTS	frc	C3X2D4	Proteobacteria	Betaproteobacteria	Burkholderiales	Oxalobacteraceae	Oxalobacter	Oxalobacter formigenes HOxBLS	X319146421	Healthy	0.0762255
fran	MTS	frc	C3X762	Proteobacteria	Betaproteobacteria	Burkholderiales	Oxalobacteraceae	Oxalobacter	Oxalobacter formigenes HOxBLS	X319146421	Healthy	30.182
fran	MTS	frc	O06644	Proteobacteria	Betaproteobacteria	Burkholderiales	Oxalobacteraceae	Oxalobacter	Oxalobacter formigenes	X319146421	Healthy	8.19506
HMP2	MTG	frc	A0A377BTA6	Proteobacteria	Gammaproteobacteria	Enterobacterales	Enterobacteriaceae	Escherichia	Escherichia coli	C2039	Healthy	0.0317401
HMP2	MTG	frc	A1ADQ1	Proteobacteria	Gammaproteobacteria	Enterobacterales	Enterobacteriaceae	Escherichia	Escherichia coli APEC O1	C2039	Healthy	0.0336475
HMP2	MTG	frc	A0A1V8Q5N2	Actinobacteria	Actinobacteria	Bifidobacteriales	Bifidobacteriaceae	Bifidobacterium	Bifidobacterium dentium	C2047	Healthy	0.219759
HMP2	MTG	frc	C3X2D4	Proteobacteria	Betaproteobacteria	Burkholderiales	Oxalobacteraceae	Oxalobacter	Oxalobacter formigenes HOxBLS	C2047	Healthy	0.551406
HMP2	MTG	frc	C3X762	Proteobacteria	Betaproteobacteria	Burkholderiales	Oxalobacteraceae	Oxalobacter	Oxalobacter formigenes HOxBLS	C2047	Healthy	2.03381
HMP2	MTG	frc	H1RYM1	Proteobacteria	Betaproteobacteria	Burkholderiales	Burkholderiaceae	Cupriavidus	Cupriavidus basilensis OR16	C2047	Healthy	0.0488852
HMP2	MTG	frc	A0A377BTA6	Proteobacteria	Gammaproteobacteria	Enterobacterales	Enterobacteriaceae	Escherichia	Escherichia coli	C2072	Healthy	0.0336967
HMP2	MTG	frc	A0A071LN49	Proteobacteria	Gammaproteobacteria	Enterobacterales	Enterobacteriaceae	Mangrovibacter	Mangrovibacter sp. MFB070	C3022	Healthy	0.0719452
HMP2	MTG	frc	A0A087ADU5	Actinobacteria	Actinobacteria	Bifidobacteriales	Bifidobacteriaceae	Bifidobacterium	Bifidobacterium choerinum	C3022	Healthy	0.0541847
HMP2	MTG	frc	A0A087BE81	Actinobacteria	Actinobacteria	Bifidobacteriales	Bifidobacteriaceae	Bifidobacterium	Bifidobacterium magnum	C3022	Healthy	0.0469011
HMP2	MTG	frc	A0A0L7BLA3	Actinobacteria	Actinobacteria	Bifidobacteriales	Bifidobacteriaceae	Bifidobacterium	Bifidobacterium animalis subsp. animalis MCC 0483	C3022	Healthy	0.0656777
HMP2	MTG	frc	A0A0R1PNQ4	Firmicutes	Bacilli	Lactobacillales	Lactobacillaceae	Lactobacillus	Lactobacillus kefiranofaciens subsp. kefirgranum D	C3022	Healthy	0.0464786
HMP2	MTG	frc	A0A174S0X3	Firmicutes	Clostridia	Clostridiales	Clostridiaceae	Clostridium	Clostridium baratii	C3022	Healthy	0.107666
HMP2	MTG	frc	A0A1B1SBJ2	Bacteroidetes	Bacteroidia	Bacteroidales	Muribaculaceae	Muribaculum	Muribaculum intestinale	C3022	Healthy	2.53244
HMP2	MTG	frc	A0A1Q6EIZ9	Bacteroidetes	Bacteroidia	Bacteroidales	NA	NA	Bacteroidales bacterium 52_46	C3022	Healthy	0.415012
HMP2	MTG	frc	A0A1Q6U8Z5	Proteobacteria	Alphaproteobacteria	Rhodospirillales	Rhodospirillaceae	Azospirillum	Azospirillum sp. 51_20	C3022	Healthy	0.371848
HMP2	MTG	frc	A0A257KV76	Proteobacteria	Alphaproteobacteria	Rhizobiales	Bradyrhizobiaceae	NA	Bradyrhizobiaceae bacterium PARB1	C3022	Healthy	0.031974
HMP2	MTG	frc	A0A2N3R094	Actinobacteria	Actinobacteria	Bifidobacteriales	Bifidobacteriaceae	Bifidobacterium	Bifidobacterium pseudolongum subsp. pseudolongum	C3022	Healthy	0.0433186
HMP2	MTG	frc	A0A2V1IPP0	Bacteroidetes	Bacteroidia	Bacteroidales	Muribaculaceae	NA	Muribaculaceae bacterium DSM 103720	C3022	Healthy	1.28507
HMP2	MTG	frc	A0A2V1J0Z5	Bacteroidetes	Bacteroidia	Bacteroidales	Muribaculaceae	NA	Muribaculaceae bacterium DSM 100764	C3022	Healthy	6.89094
HMP2	MTG	frc	A0A354HZG4	Bacteroidetes	Bacteroidia	Bacteroidales	Porphyromonadaceae	NA	Porphyromonadaceae bacterium	C3022	Healthy	12.0683
HMP2	MTG	frc	A0A355Z7A2	Bacteroidetes	Bacteroidia	Bacteroidales	Porphyromonadaceae	NA	Porphyromonadaceae bacterium	C3022	Healthy	2.30555
HMP2	MTG	frc	A0A377BTA6	Proteobacteria	Gammaproteobacteria	Enterobacterales	Enterobacteriaceae	Escherichia	Escherichia coli	C3022	Healthy	0.0714572
HMP2	MTG	frc	A1ADQ1	Proteobacteria	Gammaproteobacteria	Enterobacterales	Enterobacteriaceae	Escherichia	Escherichia coli APEC O1	C3022	Healthy	0.0421075
HMP2	MTG	frc	R5AR18	Bacteroidetes	Bacteroidia	Bacteroidales	Prevotellaceae	Prevotella	Prevotella sp. CAG:1031	C3022	Healthy	2.40988
HMP2	MTG	frc	R5AXI8	Bacteroidetes	Bacteroidia	Bacteroidales	Bacteroidaceae	Bacteroides	Bacteroides sp. CAG:927	C3022	Healthy	4.31593
HMP2	MTS	frc	A0A087BE81	Actinobacteria	Actinobacteria	Bifidobacteriales	Bifidobacteriaceae	Bifidobacterium	Bifidobacterium magnum	C3022	Healthy	0.0378666
HMP2	MTS	frc	A0A1B1SBJ2	Bacteroidetes	Bacteroidia	Bacteroidales	Muribaculaceae	Muribaculum	Muribaculum intestinale	C3022	Healthy	0.25459
HMP2	MTS	frc	A0A1Q6EIZ9	Bacteroidetes	Bacteroidia	Bacteroidales	NA	NA	Bacteroidales bacterium 52_46	C3022	Healthy	0.0785139
HMP2	MTS	frc	A0A1Q6U8Z5	Proteobacteria	Alphaproteobacteria	Rhodospirillales	Rhodospirillaceae	Azospirillum	Azospirillum sp. 51_20	C3022	Healthy	0.0815134
HMP2	MTS	frc	A0A2V1IPP0	Bacteroidetes	Bacteroidia	Bacteroidales	Muribaculaceae	NA	Muribaculaceae bacterium DSM 103720	C3022	Healthy	0.0943742
HMP2	MTS	frc	A0A2V1J0Z5	Bacteroidetes	Bacteroidia	Bacteroidales	Muribaculaceae	NA	Muribaculaceae bacterium DSM 100764	C3022	Healthy	1.11583
HMP2	MTS	frc	A0A354HZG4	Bacteroidetes	Bacteroidia	Bacteroidales	Porphyromonadaceae	NA	Porphyromonadaceae bacterium	C3022	Healthy	0.8259
HMP2	MTS	frc	A0A355Z7A2	Bacteroidetes	Bacteroidia	Bacteroidales	Porphyromonadaceae	NA	Porphyromonadaceae bacterium	C3022	Healthy	0.348819
HMP2	MTS	frc	C3X762	Proteobacteria	Betaproteobacteria	Burkholderiales	Oxalobacteraceae	Oxalobacter	Oxalobacter formigenes HOxBLS	C3022	Healthy	0.0384851
HMP2	MTS	frc	R5AR18	Bacteroidetes	Bacteroidia	Bacteroidales	Prevotellaceae	Prevotella	Prevotella sp. CAG:1031	C3022	Healthy	0.371116
HMP2	MTS	frc	R5AXI8	Bacteroidetes	Bacteroidia	Bacteroidales	Bacteroidaceae	Bacteroides	Bacteroides sp. CAG:927	C3022	Healthy	0.475899
HMP2	MTG	frc	A0A016XI66	Proteobacteria	Betaproteobacteria	Burkholderiales	Comamonadaceae	Hylemonella	Hylemonella gracilis str. Niagara R	C4008	Healthy	0.123916
HMP2	MTG	frc	A0A024KXD2	Proteobacteria	Gammaproteobacteria	Enterobacterales	Enterobacteriaceae	Escherichia	Escherichia coli D6-113.11	C4008	Healthy	0.790163
HMP2	MTG	frc	A0A062XDE4	Firmicutes	Bacilli	Lactobacillales	Lactobacillaceae	Lactobacillus	Lactobacillus animalis	C4008	Healthy	0.194445
HMP2	MTG	frc	A0A072MW66	Actinobacteria	Actinobacteria	Bifidobacteriales	Bifidobacteriaceae	Bifidobacterium	Bifidobacterium pseudocatenulatum IPLA36007	C4008	Healthy	1.62603
HMP2	MTG	frc	A0A087QB11	Firmicutes	Bacilli	Lactobacillales	Lactobacillaceae	Lactobacillus	Lactobacillus gasseri SV-16A-US	C4008	Healthy	0.109279
HMP2	MTG	frc	A0A0B1N9J8	Proteobacteria	Gammaproteobacteria	Enterobacterales	Enterobacteriaceae	Escherichia	Escherichia coli	C4008	Healthy	0.0313514
HMP2	MTG	frc	A0A0H2QXU0	Proteobacteria	Gammaproteobacteria	Enterobacterales	Morganellaceae	Moellerella	Moellerella wisconsensis	C4008	Healthy	0.0302204
HMP2	MTG	frc	A0A0L0ALL8	Proteobacteria	Gammaproteobacteria	Enterobacterales	Enterobacteriaceae	Klebsiella	Klebsiella sp. RIT-PI-d	C4008	Healthy	0.0376268
HMP2	MTG	frc	A0A174BHB6	Actinobacteria	Actinobacteria	Bifidobacteriales	Bifidobacteriaceae	Bifidobacterium	Bifidobacterium pseudocatenulatum	C4008	Healthy	0.245038
HMP2	MTG	frc	A0A1Q6EPI6	Actinobacteria	Actinobacteria	Bifidobacteriales	Bifidobacteriaceae	Bifidobacterium	Bifidobacterium sp. 56_9_plus	C4008	Healthy	0.156956
HMP2	MTG	frc	A0A1V3Y246	Firmicutes	Bacilli	Lactobacillales	Lactobacillaceae	Lactobacillus	Lactobacillus gasseri	C4008	Healthy	0.0654169
HMP2	MTG	frc	A0A2Z2J8H3	Proteobacteria	Gammaproteobacteria	Enterobacterales	Enterobacteriaceae	Escherichia	Escherichia coli	C4008	Healthy	0.0710779
HMP2	MTG	frc	A0A377BTA6	Proteobacteria	Gammaproteobacteria	Enterobacterales	Enterobacteriaceae	Escherichia	Escherichia coli	C4008	Healthy	0.900666
HMP2	MTG	frc	A1ADQ1	Proteobacteria	Gammaproteobacteria	Enterobacterales	Enterobacteriaceae	Escherichia	Escherichia coli APEC O1	C4008	Healthy	9.54977
HMP2	MTG	frc	A4G241	Proteobacteria	Betaproteobacteria	Burkholderiales	Oxalobacteraceae	Herminiimonas	Herminiimonas arsenicoxydans	C4008	Healthy	0.0311269
HMP2	MTG	frc	B5YYX4	Proteobacteria	Gammaproteobacteria	Enterobacterales	Enterobacteriaceae	Escherichia	Escherichia coli O157:H7 str. EC4115	C4008	Healthy	0.47387
HMP2	MTG	frc	Q3YZF6	Proteobacteria	Gammaproteobacteria	Enterobacterales	Enterobacteriaceae	Shigella	Shigella sonnei Ss046	C4008	Healthy	0.0559641
HMP2	MTG	frc	Q8FFE8	Proteobacteria	Gammaproteobacteria	Enterobacterales	Enterobacteriaceae	Escherichia	Escherichia coli CFT073	C4008	Healthy	0.111928
HMP2	MTG	frc	A0A072MW66	Actinobacteria	Actinobacteria	Bifidobacteriales	Bifidobacteriaceae	Bifidobacterium	Bifidobacterium pseudocatenulatum IPLA36007	C4009	Healthy	0.0536839
HMP2	MTG	frc	A0A377BTA6	Proteobacteria	Gammaproteobacteria	Enterobacterales	Enterobacteriaceae	Escherichia	Escherichia coli	C4009	Healthy	0.108187
HMP2	MTG	frc	A1ADQ1	Proteobacteria	Gammaproteobacteria	Enterobacterales	Enterobacteriaceae	Escherichia	Escherichia coli APEC O1	C4009	Healthy	0.382268
HMP2	MTG	frc	A1ADQ1	Proteobacteria	Gammaproteobacteria	Enterobacterales	Enterobacteriaceae	Escherichia	Escherichia coli APEC O1	C4016	Healthy	0.36783
HMP2	MTG	frc	A0A377BTA6	Proteobacteria	Gammaproteobacteria	Enterobacterales	Enterobacteriaceae	Escherichia	Escherichia coli	C6018	Healthy	0.534814
HMP2	MTG	frc	A1ADQ1	Proteobacteria	Gammaproteobacteria	Enterobacterales	Enterobacteriaceae	Escherichia	Escherichia coli APEC O1	C6018	Healthy	1.80395
HMP2	MTG	frc	A0A016XI66	Proteobacteria	Betaproteobacteria	Burkholderiales	Comamonadaceae	Hylemonella	Hylemonella gracilis str. Niagara R	E5002	Healthy	0.0681614
HMP2	MTG	frc	A0A060DUT7	Proteobacteria	Alphaproteobacteria	Rhodospirillales	Rhodospirillaceae	Azospirillum	Azospirillum brasilense	E5002	Healthy	0.0285585
HMP2	MTG	frc	A0A071LN49	Proteobacteria	Gammaproteobacteria	Enterobacterales	Enterobacteriaceae	Mangrovibacter	Mangrovibacter sp. MFB070	E5002	Healthy	0.0650995
HMP2	MTG	frc	A0A072MW66	Actinobacteria	Actinobacteria	Bifidobacteriales	Bifidobacteriaceae	Bifidobacterium	Bifidobacterium pseudocatenulatum IPLA36007	E5002	Healthy	0.266689
HMP2	MTG	frc	A0A087ADU5	Actinobacteria	Actinobacteria	Bifidobacteriales	Bifidobacteriaceae	Bifidobacterium	Bifidobacterium choerinum	E5002	Healthy	0.121298
HMP2	MTG	frc	A0A087QB11	Firmicutes	Bacilli	Lactobacillales	Lactobacillaceae	Lactobacillus	Lactobacillus gasseri SV-16A-US	E5002	Healthy	0.0397199
HMP2	MTG	frc	A0A0A7I974	Actinobacteria	Actinobacteria	Bifidobacteriales	Bifidobacteriaceae	Bifidobacterium	Bifidobacterium pseudolongum PV8-2	E5002	Healthy	0.0248771
HMP2	MTG	frc	A0A1V8Q5N2	Actinobacteria	Actinobacteria	Bifidobacteriales	Bifidobacteriaceae	Bifidobacterium	Bifidobacterium dentium	E5002	Healthy	0.553756
HMP2	MTG	frc	A0A209A2M1	Proteobacteria	Gammaproteobacteria	Enterobacterales	Yersiniaceae	Yersinia	Yersinia frederiksenii	E5002	Healthy	0.0319079
HMP2	MTG	frc	A0A377BTA6	Proteobacteria	Gammaproteobacteria	Enterobacterales	Enterobacteriaceae	Escherichia	Escherichia coli	E5002	Healthy	0.412972
HMP2	MTG	frc	A1ADQ1	Proteobacteria	Gammaproteobacteria	Enterobacterales	Enterobacteriaceae	Escherichia	Escherichia coli APEC O1	E5002	Healthy	1.51345
HMP2	MTS	frc	A0A087ADU5	Actinobacteria	Actinobacteria	Bifidobacteriales	Bifidobacteriaceae	Bifidobacterium	Bifidobacterium choerinum	E5002	Healthy	0.206217
HMP2	MTS	frc	A0A087B567	Actinobacteria	Actinobacteria	Bifidobacteriales	Bifidobacteriaceae	Bifidobacterium	Bifidobacterium cuniculi	E5002	Healthy	0.0258353
HMP2	MTS	frc	A0A1V8Q5N2	Actinobacteria	Actinobacteria	Bifidobacteriales	Bifidobacteriaceae	Bifidobacterium	Bifidobacterium dentium	E5002	Healthy	1.49626
HMP2	MTG	frc	A0A016XI66	Proteobacteria	Betaproteobacteria	Burkholderiales	Comamonadaceae	Hylemonella	Hylemonella gracilis str. Niagara R	H4008	Healthy	0.0428803
HMP2	MTG	frc	A0A028EDB1	Proteobacteria	Gammaproteobacteria	Enterobacterales	Enterobacteriaceae	Escherichia	Escherichia coli O118:H16 str. 2009C-4446	H4008	Healthy	0.074027
HMP2	MTG	frc	A0A062XDE4	Firmicutes	Bacilli	Lactobacillales	Lactobacillaceae	Lactobacillus	Lactobacillus animalis	H4008	Healthy	0.190618
HMP2	MTG	frc	A0A072MW66	Actinobacteria	Actinobacteria	Bifidobacteriales	Bifidobacteriaceae	Bifidobacterium	Bifidobacterium pseudocatenulatum IPLA36007	H4008	Healthy	0.565629
HMP2	MTG	frc	A0A073JPH8	Firmicutes	Bacilli	Lactobacillales	Lactobacillaceae	Lactobacillus	Lactobacillus reuteri	H4008	Healthy	0.0340986
HMP2	MTG	frc	A0A080IWR8	Proteobacteria	Gammaproteobacteria	Enterobacterales	Enterobacteriaceae	Escherichia	Escherichia coli 1-250-04_S3_C2	H4008	Healthy	0.0276
HMP2	MTG	frc	A0A087QB11	Firmicutes	Bacilli	Lactobacillales	Lactobacillaceae	Lactobacillus	Lactobacillus gasseri SV-16A-US	H4008	Healthy	0.443406
HMP2	MTG	frc	A0A0K4YN22	Proteobacteria	Gammaproteobacteria	Enterobacterales	Enterobacteriaceae	Escherichia	Escherichia coli	H4008	Healthy	0.0255479
HMP2	MTG	frc	A0A0L0ALL8	Proteobacteria	Gammaproteobacteria	Enterobacterales	Enterobacteriaceae	Klebsiella	Klebsiella sp. RIT-PI-d	H4008	Healthy	0.0645035
HMP2	MTG	frc	A0A0R1PNQ4	Firmicutes	Bacilli	Lactobacillales	Lactobacillaceae	Lactobacillus	Lactobacillus kefiranofaciens subsp. kefirgranum D	H4008	Healthy	0.0387903
HMP2	MTG	frc	A0A0R1XV35	Firmicutes	Bacilli	Lactobacillales	Lactobacillaceae	Lactobacillus	Lactobacillus intestinalis DSM 6629	H4008	Healthy	0.0241805
HMP2	MTG	frc	A0A0R2KS09	Firmicutes	Bacilli	Lactobacillales	Lactobacillaceae	Lactobacillus	Lactobacillus amylovorus DSM 16698	H4008	Healthy	0.024204
HMP2	MTG	frc	A0A140NM80	Proteobacteria	Gammaproteobacteria	Enterobacterales	Morganellaceae	Providencia	Providencia stuartii MRSN 2154	H4008	Healthy	0.0517665
HMP2	MTG	frc	A0A174BHB6	Actinobacteria	Actinobacteria	Bifidobacteriales	Bifidobacteriaceae	Bifidobacterium	Bifidobacterium pseudocatenulatum	H4008	Healthy	0.0598626
HMP2	MTG	frc	A0A1C7CW93	Proteobacteria	Gammaproteobacteria	Enterobacterales	Enterobacteriaceae	Escherichia	Escherichia coli	H4008	Healthy	0.0368364
HMP2	MTG	frc	A0A1I1DMD5	Proteobacteria	Betaproteobacteria	Burkholderiales	Oxalobacteraceae	Collimonas	Collimonas sp. OK412	H4008	Healthy	0.0356474
HMP2	MTG	frc	A0A1Q6EPI6	Actinobacteria	Actinobacteria	Bifidobacteriales	Bifidobacteriaceae	Bifidobacterium	Bifidobacterium sp. 56_9_plus	H4008	Healthy	0.0767869
HMP2	MTG	frc	A0A1V3Y246	Firmicutes	Bacilli	Lactobacillales	Lactobacillaceae	Lactobacillus	Lactobacillus gasseri	H4008	Healthy	0.110503
HMP2	MTG	frc	A0A1Y0E341	Firmicutes	Bacilli	Lactobacillales	Lactobacillaceae	Lactobacillus	Lactobacillus gasseri	H4008	Healthy	0.109825
HMP2	MTG	frc	A0A209A2M1	Proteobacteria	Gammaproteobacteria	Enterobacterales	Yersiniaceae	Yersinia	Yersinia frederiksenii	H4008	Healthy	0.0263241
HMP2	MTG	frc	A0A2I6E5X4	Proteobacteria	Gammaproteobacteria	Enterobacterales	Enterobacteriaceae	Enterobacter	Enterobacter cancerogenus	H4008	Healthy	0.0402046
HMP2	MTG	frc	A0A377BTA6	Proteobacteria	Gammaproteobacteria	Enterobacterales	Enterobacteriaceae	Escherichia	Escherichia coli	H4008	Healthy	0.672825
HMP2	MTG	frc	A1ADQ1	Proteobacteria	Gammaproteobacteria	Enterobacterales	Enterobacteriaceae	Escherichia	Escherichia coli APEC O1	H4008	Healthy	2.21729
HMP2	MTG	frc	A4G241	Proteobacteria	Betaproteobacteria	Burkholderiales	Oxalobacteraceae	Herminiimonas	Herminiimonas arsenicoxydans	H4008	Healthy	0.0367485
HMP2	MTG	frc	B5YYX4	Proteobacteria	Gammaproteobacteria	Enterobacterales	Enterobacteriaceae	Escherichia	Escherichia coli O157:H7 str. EC4115	H4008	Healthy	0.25334
HMP2	MTG	frc	C7XLI6	Firmicutes	Bacilli	Lactobacillales	Lactobacillaceae	Lactobacillus	Lactobacillus crispatus 125-2-CHN	H4008	Healthy	0.0535751
HMP2	MTS	frc	A1ADQ1	Proteobacteria	Gammaproteobacteria	Enterobacterales	Enterobacteriaceae	Escherichia	Escherichia coli APEC O1	H4008	Healthy	0.126072
HMP2	MTS	frc	C3X762	Proteobacteria	Betaproteobacteria	Burkholderiales	Oxalobacteraceae	Oxalobacter	Oxalobacter formigenes HOxBLS	H4008	Healthy	0.891392
HMP2	MTG	frc	A0A072MW66	Actinobacteria	Actinobacteria	Bifidobacteriales	Bifidobacteriaceae	Bifidobacterium	Bifidobacterium pseudocatenulatum IPLA36007	H4009	Healthy	0.150677
HMP2	MTG	frc	A0A369DPH8	Proteobacteria	Gammaproteobacteria	Enterobacterales	Enterobacteriaceae	Escherichia	Escherichia coli	H4009	Healthy	0.0195687
HMP2	MTG	frc	A0A377BTA6	Proteobacteria	Gammaproteobacteria	Enterobacterales	Enterobacteriaceae	Escherichia	Escherichia coli	H4009	Healthy	0.43615
HMP2	MTG	frc	A1ADQ1	Proteobacteria	Gammaproteobacteria	Enterobacterales	Enterobacteriaceae	Escherichia	Escherichia coli APEC O1	H4009	Healthy	0.300808
HMP2	MTS	frc	C3X762	Proteobacteria	Betaproteobacteria	Burkholderiales	Oxalobacteraceae	Oxalobacter	Oxalobacter formigenes HOxBLS	H4009	Healthy	0.275787
HMP2	MTS	frc	O06644	Proteobacteria	Betaproteobacteria	Burkholderiales	Oxalobacteraceae	Oxalobacter	Oxalobacter formigenes	H4009	Healthy	0.169753
HMP2	MTG	frc	A0A377BTA6	Proteobacteria	Gammaproteobacteria	Enterobacterales	Enterobacteriaceae	Escherichia	Escherichia coli	H4013	Healthy	0.0420929
HMP2	MTG	frc	A0A072MW66	Actinobacteria	Actinobacteria	Bifidobacteriales	Bifidobacteriaceae	Bifidobacterium	Bifidobacterium pseudocatenulatum IPLA36007	H4016	Healthy	0.0408025
HMP2	MTG	frc	A0A087ADU5	Actinobacteria	Actinobacteria	Bifidobacteriales	Bifidobacteriaceae	Bifidobacterium	Bifidobacterium choerinum	H4016	Healthy	0.0200597
HMP2	MTG	frc	A0A087B567	Actinobacteria	Actinobacteria	Bifidobacteriales	Bifidobacteriaceae	Bifidobacterium	Bifidobacterium cuniculi	H4016	Healthy	0.024903
HMP2	MTG	frc	A0A1V8Q5N2	Actinobacteria	Actinobacteria	Bifidobacteriales	Bifidobacteriaceae	Bifidobacterium	Bifidobacterium dentium	H4016	Healthy	0.0800928
HMP2	MTG	frc	A0A377BTA6	Proteobacteria	Gammaproteobacteria	Enterobacterales	Enterobacteriaceae	Escherichia	Escherichia coli	H4016	Healthy	0.042537
HMP2	MTG	frc	A1ADQ1	Proteobacteria	Gammaproteobacteria	Enterobacterales	Enterobacteriaceae	Escherichia	Escherichia coli APEC O1	H4016	Healthy	0.137553
HMP2	MTG	frc	A0A023Z0D7	Proteobacteria	Gammaproteobacteria	Enterobacterales	Enterobacteriaceae	Escherichia	Escherichia coli O145:H28 str. RM12581	H4018	Healthy	0.0362299
HMP2	MTG	frc	A0A072MW66	Actinobacteria	Actinobacteria	Bifidobacteriales	Bifidobacteriaceae	Bifidobacterium	Bifidobacterium pseudocatenulatum IPLA36007	H4018	Healthy	0.0404471
HMP2	MTG	frc	A0A087ADU5	Actinobacteria	Actinobacteria	Bifidobacteriales	Bifidobacteriaceae	Bifidobacterium	Bifidobacterium choerinum	H4018	Healthy	0.0306702
HMP2	MTG	frc	A0A1V8Q5N2	Actinobacteria	Actinobacteria	Bifidobacteriales	Bifidobacteriaceae	Bifidobacterium	Bifidobacterium dentium	H4018	Healthy	0.280028
HMP2	MTG	frc	A0A2V7C257	Candidatus Rokubacteria	NA	NA	NA	NA	Candidatus Rokubacteria bacterium	H4018	Healthy	0.0334956
HMP2	MTG	frc	A0A377BTA6	Proteobacteria	Gammaproteobacteria	Enterobacterales	Enterobacteriaceae	Escherichia	Escherichia coli	H4018	Healthy	0.698059
HMP2	MTG	frc	A1ADQ1	Proteobacteria	Gammaproteobacteria	Enterobacterales	Enterobacteriaceae	Escherichia	Escherichia coli APEC O1	H4018	Healthy	1.26973
HMP2	MTG	frc	Q8FFE8	Proteobacteria	Gammaproteobacteria	Enterobacterales	Enterobacteriaceae	Escherichia	Escherichia coli CFT073	H4018	Healthy	0.0276126
HMP2	MTS	frc	A0A377BTA6	Proteobacteria	Gammaproteobacteria	Enterobacterales	Enterobacteriaceae	Escherichia	Escherichia coli	H4018	Healthy	0.165886
HMP2	MTG	frc	A0A072MW66	Actinobacteria	Actinobacteria	Bifidobacteriales	Bifidobacteriaceae	Bifidobacterium	Bifidobacterium pseudocatenulatum IPLA36007	H4022	Healthy	3.37414
HMP2	MTG	frc	A0A174BHB6	Actinobacteria	Actinobacteria	Bifidobacteriales	Bifidobacteriaceae	Bifidobacterium	Bifidobacterium pseudocatenulatum	H4022	Healthy	0.317738
HMP2	MTG	frc	A0A1Q6EPI6	Actinobacteria	Actinobacteria	Bifidobacteriales	Bifidobacteriaceae	Bifidobacterium	Bifidobacterium sp. 56_9_plus	H4022	Healthy	0.273087
HMP2	MTG	frc	A0A377BTA6	Proteobacteria	Gammaproteobacteria	Enterobacterales	Enterobacteriaceae	Escherichia	Escherichia coli	H4022	Healthy	0.0207663
HMP2	MTG	frc	A1ADQ1	Proteobacteria	Gammaproteobacteria	Enterobacterales	Enterobacteriaceae	Escherichia	Escherichia coli APEC O1	H4022	Healthy	0.420737
HMP2	MTG	frc	A0A377BTA6	Proteobacteria	Gammaproteobacteria	Enterobacterales	Enterobacteriaceae	Escherichia	Escherichia coli	H4023	Healthy	0.157455
HMP2	MTG	frc	A1ADQ1	Proteobacteria	Gammaproteobacteria	Enterobacterales	Enterobacteriaceae	Escherichia	Escherichia coli APEC O1	H4023	Healthy	0.313506
HMP2	MTS	frc	C3X762	Proteobacteria	Betaproteobacteria	Burkholderiales	Oxalobacteraceae	Oxalobacter	Oxalobacter formigenes HOxBLS	H4023	Healthy	0.553264
HMP2	MTG	frc	A0A016XI66	Proteobacteria	Betaproteobacteria	Burkholderiales	Comamonadaceae	Hylemonella	Hylemonella gracilis str. Niagara R	H4024	Healthy	0.0181511
HMP2	MTG	frc	A0A377BTA6	Proteobacteria	Gammaproteobacteria	Enterobacterales	Enterobacteriaceae	Escherichia	Escherichia coli	H4024	Healthy	0.0402805
HMP2	MTG	frc	A1ADQ1	Proteobacteria	Gammaproteobacteria	Enterobacterales	Enterobacteriaceae	Escherichia	Escherichia coli APEC O1	H4024	Healthy	0.0815277
HMP2	MTG	frc	B5YYX4	Proteobacteria	Gammaproteobacteria	Enterobacterales	Enterobacteriaceae	Escherichia	Escherichia coli O157:H7 str. EC4115	H4024	Healthy	0.0540828
HMP2	MTG	frc	C3X2D4	Proteobacteria	Betaproteobacteria	Burkholderiales	Oxalobacteraceae	Oxalobacter	Oxalobacter formigenes HOxBLS	H4024	Healthy	0.0476837
HMP2	MTG	frc	C3X762	Proteobacteria	Betaproteobacteria	Burkholderiales	Oxalobacteraceae	Oxalobacter	Oxalobacter formigenes HOxBLS	H4024	Healthy	0.0316254
HMP2	MTS	frc	C3X2D4	Proteobacteria	Betaproteobacteria	Burkholderiales	Oxalobacteraceae	Oxalobacter	Oxalobacter formigenes HOxBLS	H4024	Healthy	0.0915352
HMP2	MTS	frc	C3X762	Proteobacteria	Betaproteobacteria	Burkholderiales	Oxalobacteraceae	Oxalobacter	Oxalobacter formigenes HOxBLS	H4024	Healthy	0.237599
HMP2	MTG	frc	A0A072MW66	Actinobacteria	Actinobacteria	Bifidobacteriales	Bifidobacteriaceae	Bifidobacterium	Bifidobacterium pseudocatenulatum IPLA36007	H4045	Healthy	0.0309091
HMP2	MTG	frc	A0A377BTA6	Proteobacteria	Gammaproteobacteria	Enterobacterales	Enterobacteriaceae	Escherichia	Escherichia coli	H4045	Healthy	0.224457
HMP2	MTG	frc	A1ADQ1	Proteobacteria	Gammaproteobacteria	Enterobacterales	Enterobacteriaceae	Escherichia	Escherichia coli APEC O1	H4045	Healthy	2.26644
HMP2	MTG	frc	B5YYX4	Proteobacteria	Gammaproteobacteria	Enterobacterales	Enterobacteriaceae	Escherichia	Escherichia coli O157:H7 str. EC4115	H4045	Healthy	0.834546
HMP2	MTG	frc	C3X762	Proteobacteria	Betaproteobacteria	Burkholderiales	Oxalobacteraceae	Oxalobacter	Oxalobacter formigenes HOxBLS	H4045	Healthy	0.287419
HMP2	MTG	frc	H1RYM1	Proteobacteria	Betaproteobacteria	Burkholderiales	Burkholderiaceae	Cupriavidus	Cupriavidus basilensis OR16	H4045	Healthy	0.0580314
HMP2	MTG	frc	O06644	Proteobacteria	Betaproteobacteria	Burkholderiales	Oxalobacteraceae	Oxalobacter	Oxalobacter formigenes	H4045	Healthy	0.284733
HMP2	MTG	frc	Q3YZF6	Proteobacteria	Gammaproteobacteria	Enterobacterales	Enterobacteriaceae	Shigella	Shigella sonnei Ss046	H4045	Healthy	0.0588137
HMP2	MTS	frc	C3X762	Proteobacteria	Betaproteobacteria	Burkholderiales	Oxalobacteraceae	Oxalobacter	Oxalobacter formigenes HOxBLS	H4045	Healthy	0.730128
HMP2	MTS	frc	O06644	Proteobacteria	Betaproteobacteria	Burkholderiales	Oxalobacteraceae	Oxalobacter	Oxalobacter formigenes	H4045	Healthy	0.789059
HMP2	MTG	frc	A0A022GG59	Proteobacteria	Betaproteobacteria	Burkholderiales	Burkholderiaceae	Cupriavidus	Cupriavidus sp. SK-4	M2039	Healthy	0.0269066
HMP2	MTG	frc	A0A072MW66	Actinobacteria	Actinobacteria	Bifidobacteriales	Bifidobacteriaceae	Bifidobacterium	Bifidobacterium pseudocatenulatum IPLA36007	M2039	Healthy	0.0400462
HMP2	MTG	frc	A0A087ADU5	Actinobacteria	Actinobacteria	Bifidobacteriales	Bifidobacteriaceae	Bifidobacterium	Bifidobacterium choerinum	M2039	Healthy	0.0667014
HMP2	MTG	frc	A0A0Q4YS67	Proteobacteria	Alphaproteobacteria	Rhizobiales	Methylobacteriaceae	Methylobacterium	Methylobacterium sp. Leaf104	M2039	Healthy	0.026399
HMP2	MTG	frc	A0A377BTA6	Proteobacteria	Gammaproteobacteria	Enterobacterales	Enterobacteriaceae	Escherichia	Escherichia coli	M2039	Healthy	0.0271244
HMP2	MTG	frc	A1ADQ1	Proteobacteria	Gammaproteobacteria	Enterobacterales	Enterobacteriaceae	Escherichia	Escherichia coli APEC O1	M2039	Healthy	0.0287545
HMP2	MTG	frc	A0A016XI66	Proteobacteria	Betaproteobacteria	Burkholderiales	Comamonadaceae	Hylemonella	Hylemonella gracilis str. Niagara R	M2041	Healthy	0.0243322
HMP2	MTG	frc	A0A038GWE8	Proteobacteria	Betaproteobacteria	Burkholderiales	Burkholderiaceae	Caballeronia	Caballeronia jiangsuensis	M2041	Healthy	0.0321069
HMP2	MTG	frc	A0A377BTA6	Proteobacteria	Gammaproteobacteria	Enterobacterales	Enterobacteriaceae	Escherichia	Escherichia coli	M2041	Healthy	0.388467
HMP2	MTG	frc	A1ADQ1	Proteobacteria	Gammaproteobacteria	Enterobacterales	Enterobacteriaceae	Escherichia	Escherichia coli APEC O1	M2041	Healthy	0.518531
HMP2	MTS	frc	A0A377BTA6	Proteobacteria	Gammaproteobacteria	Enterobacterales	Enterobacteriaceae	Escherichia	Escherichia coli	M2041	Healthy	0.0619261
HMP2	MTG	frc	A0A089QH55	Proteobacteria	Alphaproteobacteria	Rhizobiales	Methylobacteriaceae	Methylobacterium	Methylobacterium oryzae CBMB20	M2042	Healthy	0.21544
HMP2	MTG	frc	A0A2V7C257	Candidatus Rokubacteria	NA	NA	NA	NA	Candidatus Rokubacteria bacterium	M2042	Healthy	0.049112
HMP2	MTG	frc	A0A2W5RAA1	Proteobacteria	Alphaproteobacteria	Rhizobiales	Xanthobacteraceae	Starkeya	Starkeya novella	M2042	Healthy	0.0236951
HMP2	MTG	frc	A1ADQ1	Proteobacteria	Gammaproteobacteria	Enterobacterales	Enterobacteriaceae	Escherichia	Escherichia coli APEC O1	M2042	Healthy	0.0380445
HMP2	MTG	frc	C3X762	Proteobacteria	Betaproteobacteria	Burkholderiales	Oxalobacteraceae	Oxalobacter	Oxalobacter formigenes HOxBLS	M2042	Healthy	0.127608
HMP2	MTG	frc	H1RYM1	Proteobacteria	Betaproteobacteria	Burkholderiales	Burkholderiaceae	Cupriavidus	Cupriavidus basilensis OR16	M2042	Healthy	0.0114077
HMP2	MTG	frc	O06644	Proteobacteria	Betaproteobacteria	Burkholderiales	Oxalobacteraceae	Oxalobacter	Oxalobacter formigenes	M2042	Healthy	0.0551517
HMP2	MTG	frc	V0UR98	Proteobacteria	Gammaproteobacteria	Enterobacterales	Enterobacteriaceae	Escherichia	Escherichia coli 908519	M2042	Healthy	0.0273274
HMP2	MTS	frc	A0A377BTA6	Proteobacteria	Gammaproteobacteria	Enterobacterales	Enterobacteriaceae	Escherichia	Escherichia coli	M2042	Healthy	0.355626
HMP2	MTS	frc	C3X762	Proteobacteria	Betaproteobacteria	Burkholderiales	Oxalobacteraceae	Oxalobacter	Oxalobacter formigenes HOxBLS	M2042	Healthy	0.523542
HMP2	MTS	frc	O06644	Proteobacteria	Betaproteobacteria	Burkholderiales	Oxalobacteraceae	Oxalobacter	Oxalobacter formigenes	M2042	Healthy	0.297419
HMP2	MTG	frc	A0A072MW66	Actinobacteria	Actinobacteria	Bifidobacteriales	Bifidobacteriaceae	Bifidobacterium	Bifidobacterium pseudocatenulatum IPLA36007	M2047	Healthy	0.0936353
HMP2	MTG	frc	A0A087ADU5	Actinobacteria	Actinobacteria	Bifidobacteriales	Bifidobacteriaceae	Bifidobacterium	Bifidobacterium choerinum	M2047	Healthy	0.0423195
HMP2	MTG	frc	A0A1Q6EIZ9	Bacteroidetes	Bacteroidia	Bacteroidales	NA	NA	Bacteroidales bacterium 52_46	M2047	Healthy	0.0609142
HMP2	MTG	frc	A0A1V8Q5N2	Actinobacteria	Actinobacteria	Bifidobacteriales	Bifidobacteriaceae	Bifidobacterium	Bifidobacterium dentium	M2047	Healthy	0.0524734
HMP2	MTG	frc	A0A2V1IPP0	Bacteroidetes	Bacteroidia	Bacteroidales	Muribaculaceae	NA	Muribaculaceae bacterium DSM 103720	M2047	Healthy	0.0467843
HMP2	MTG	frc	A0A2V1J0Z5	Bacteroidetes	Bacteroidia	Bacteroidales	Muribaculaceae	NA	Muribaculaceae bacterium DSM 100764	M2047	Healthy	0.0296559
HMP2	MTG	frc	A0A354HZG4	Bacteroidetes	Bacteroidia	Bacteroidales	Porphyromonadaceae	NA	Porphyromonadaceae bacterium	M2047	Healthy	0.0569452
HMP2	MTG	frc	A0A355Z7A2	Bacteroidetes	Bacteroidia	Bacteroidales	Porphyromonadaceae	NA	Porphyromonadaceae bacterium	M2047	Healthy	0.0552582
HMP2	MTG	frc	A0A377BTA6	Proteobacteria	Gammaproteobacteria	Enterobacterales	Enterobacteriaceae	Escherichia	Escherichia coli	M2047	Healthy	0.0712343
HMP2	MTG	frc	A1ADQ1	Proteobacteria	Gammaproteobacteria	Enterobacterales	Enterobacteriaceae	Escherichia	Escherichia coli APEC O1	M2047	Healthy	0.0680677
HMP2	MTG	frc	C3X2D4	Proteobacteria	Betaproteobacteria	Burkholderiales	Oxalobacteraceae	Oxalobacter	Oxalobacter formigenes HOxBLS	M2047	Healthy	0.305679
HMP2	MTG	frc	C3X762	Proteobacteria	Betaproteobacteria	Burkholderiales	Oxalobacteraceae	Oxalobacter	Oxalobacter formigenes HOxBLS	M2047	Healthy	0.485753
HMP2	MTG	frc	G1U9U4	Firmicutes	Bacilli	Lactobacillales	Lactobacillaceae	Lactobacillus	Lactobacillus acidophilus	M2047	Healthy	0.0303
HMP2	MTG	frc	H1RYM1	Proteobacteria	Betaproteobacteria	Burkholderiales	Burkholderiaceae	Cupriavidus	Cupriavidus basilensis OR16	M2047	Healthy	0.0169221
HMP2	MTG	frc	O06644	Proteobacteria	Betaproteobacteria	Burkholderiales	Oxalobacteraceae	Oxalobacter	Oxalobacter formigenes	M2047	Healthy	0.0501256
HMP2	MTG	frc	R5AR18	Bacteroidetes	Bacteroidia	Bacteroidales	Prevotellaceae	Prevotella	Prevotella sp. CAG:1031	M2047	Healthy	0.0607206
HMP2	MTS	frc	A0A0R0LLQ9	Proteobacteria	Betaproteobacteria	Ferrovales	Ferrovaceae	Ferrovum	Ferrovum sp. JA12	M2047	Healthy	0.0179328
HMP2	MTS	frc	A0A1B1SBJ2	Bacteroidetes	Bacteroidia	Bacteroidales	Muribaculaceae	Muribaculum	Muribaculum intestinale	M2047	Healthy	0.0918577
HMP2	MTS	frc	A0A1F3ZN52	Proteobacteria	Betaproteobacteria	NA	NA	NA	Betaproteobacteria bacterium RIFCSPLOWO2_02_FULL_6	M2047	Healthy	0.037485
HMP2	MTS	frc	A0A1Q6EIZ9	Bacteroidetes	Bacteroidia	Bacteroidales	NA	NA	Bacteroidales bacterium 52_46	M2047	Healthy	0.0458994
HMP2	MTS	frc	A0A2V1IPP0	Bacteroidetes	Bacteroidia	Bacteroidales	Muribaculaceae	NA	Muribaculaceae bacterium DSM 103720	M2047	Healthy	0.139899
HMP2	MTS	frc	A0A2V1J0Z5	Bacteroidetes	Bacteroidia	Bacteroidales	Muribaculaceae	NA	Muribaculaceae bacterium DSM 100764	M2047	Healthy	0.0323892
HMP2	MTS	frc	A0A354HZG4	Bacteroidetes	Bacteroidia	Bacteroidales	Porphyromonadaceae	NA	Porphyromonadaceae bacterium	M2047	Healthy	0.0286442
HMP2	MTS	frc	A0A355Z7A2	Bacteroidetes	Bacteroidia	Bacteroidales	Porphyromonadaceae	NA	Porphyromonadaceae bacterium	M2047	Healthy	0.0933021
HMP2	MTS	frc	A8TPV6	Proteobacteria	Alphaproteobacteria	NA	NA	NA	alpha proteobacterium BAL199	M2047	Healthy	0.0297611
HMP2	MTS	frc	C3X2D4	Proteobacteria	Betaproteobacteria	Burkholderiales	Oxalobacteraceae	Oxalobacter	Oxalobacter formigenes HOxBLS	M2047	Healthy	0.909371
HMP2	MTS	frc	C3X762	Proteobacteria	Betaproteobacteria	Burkholderiales	Oxalobacteraceae	Oxalobacter	Oxalobacter formigenes HOxBLS	M2047	Healthy	2.04447
HMP2	MTS	frc	H1RYM1	Proteobacteria	Betaproteobacteria	Burkholderiales	Burkholderiaceae	Cupriavidus	Cupriavidus basilensis OR16	M2047	Healthy	0.0179829
HMP2	MTS	frc	O06644	Proteobacteria	Betaproteobacteria	Burkholderiales	Oxalobacteraceae	Oxalobacter	Oxalobacter formigenes	M2047	Healthy	0.118011
HMP2	MTS	frc	R5AR18	Bacteroidetes	Bacteroidia	Bacteroidales	Prevotellaceae	Prevotella	Prevotella sp. CAG:1031	M2047	Healthy	0.12917
HMP2	MTG	frc	A0A072MW66	Actinobacteria	Actinobacteria	Bifidobacteriales	Bifidobacteriaceae	Bifidobacterium	Bifidobacterium pseudocatenulatum IPLA36007	M2048	Healthy	0.0314344
HMP2	MTG	frc	A0A1Q6U8Z5	Proteobacteria	Alphaproteobacteria	Rhodospirillales	Rhodospirillaceae	Azospirillum	Azospirillum sp. 51_20	M2048	Healthy	1.50999
HMP2	MTG	frc	A1ADQ1	Proteobacteria	Gammaproteobacteria	Enterobacterales	Enterobacteriaceae	Escherichia	Escherichia coli APEC O1	M2048	Healthy	0.0452917
HMP2	MTG	frc	C3X762	Proteobacteria	Betaproteobacteria	Burkholderiales	Oxalobacteraceae	Oxalobacter	Oxalobacter formigenes HOxBLS	M2048	Healthy	0.032027
HMP2	MTG	frc	O06644	Proteobacteria	Betaproteobacteria	Burkholderiales	Oxalobacteraceae	Oxalobacter	Oxalobacter formigenes	M2048	Healthy	0.0675217
HMP2	MTS	frc	A0A2W5RAA1	Proteobacteria	Alphaproteobacteria	Rhizobiales	Xanthobacteraceae	Starkeya	Starkeya novella	M2048	Healthy	0.0257317
HMP2	MTS	frc	C3X762	Proteobacteria	Betaproteobacteria	Burkholderiales	Oxalobacteraceae	Oxalobacter	Oxalobacter formigenes HOxBLS	M2048	Healthy	0.51146
HMP2	MTS	frc	O06644	Proteobacteria	Betaproteobacteria	Burkholderiales	Oxalobacteraceae	Oxalobacter	Oxalobacter formigenes	M2048	Healthy	0.294777
HMP2	MTG	frc	A0A087QB11	Firmicutes	Bacilli	Lactobacillales	Lactobacillaceae	Lactobacillus	Lactobacillus gasseri SV-16A-US	M2060	Healthy	0.137375
HMP2	MTG	frc	A0A377BTA6	Proteobacteria	Gammaproteobacteria	Enterobacterales	Enterobacteriaceae	Escherichia	Escherichia coli	M2060	Healthy	0.0405044
HMP2	MTG	frc	A1ADQ1	Proteobacteria	Gammaproteobacteria	Enterobacterales	Enterobacteriaceae	Escherichia	Escherichia coli APEC O1	M2060	Healthy	0.0925588
HMP2	MTG	frc	Q8FFE8	Proteobacteria	Gammaproteobacteria	Enterobacterales	Enterobacteriaceae	Escherichia	Escherichia coli CFT073	M2060	Healthy	0.0265729
HMP2	MTS	frc	A0A0R1HAW1	Firmicutes	Bacilli	Lactobacillales	Lactobacillaceae	Lactobacillus	Lactobacillus amylovorus DSM 20531	M2060	Healthy	0.0739652
HMP2	MTS	frc	A0A377BTA6	Proteobacteria	Gammaproteobacteria	Enterobacterales	Enterobacteriaceae	Escherichia	Escherichia coli	M2060	Healthy	0.184657
HMP2	MTS	frc	G1U9U4	Firmicutes	Bacilli	Lactobacillales	Lactobacillaceae	Lactobacillus	Lactobacillus acidophilus	M2060	Healthy	0.295196
HMP2	MTG	frc	A0A1B7JUA8	Proteobacteria	Gammaproteobacteria	Enterobacterales	Morganellaceae	Providencia	Providencia heimbachae ATCC 35613	M2061	Healthy	0.031757
HMP2	MTG	frc	A0A1F3YTU9	Proteobacteria	Betaproteobacteria	NA	NA	NA	Betaproteobacteria bacterium RBG_16_64_18	M2061	Healthy	0.0325499
HMP2	MTG	frc	A0A1F3ZN52	Proteobacteria	Betaproteobacteria	NA	NA	NA	Betaproteobacteria bacterium RIFCSPLOWO2_02_FULL_6	M2061	Healthy	0.0358439
HMP2	MTG	frc	A0A354HZG4	Bacteroidetes	Bacteroidia	Bacteroidales	Porphyromonadaceae	NA	Porphyromonadaceae bacterium	M2061	Healthy	0.035003
HMP2	MTG	frc	A0A377BTA6	Proteobacteria	Gammaproteobacteria	Enterobacterales	Enterobacteriaceae	Escherichia	Escherichia coli	M2061	Healthy	0.829446
HMP2	MTG	frc	A1ADQ1	Proteobacteria	Gammaproteobacteria	Enterobacterales	Enterobacteriaceae	Escherichia	Escherichia coli APEC O1	M2061	Healthy	0.797774
HMP2	MTG	frc	B6JE29	Proteobacteria	Alphaproteobacteria	Rhizobiales	Bradyrhizobiaceae	Oligotropha	Oligotropha carboxidovorans OM5	M2061	Healthy	0.0271866
HMP2	MTG	frc	C3X762	Proteobacteria	Betaproteobacteria	Burkholderiales	Oxalobacteraceae	Oxalobacter	Oxalobacter formigenes HOxBLS	M2061	Healthy	0.391387
HMP2	MTG	frc	H1RYM1	Proteobacteria	Betaproteobacteria	Burkholderiales	Burkholderiaceae	Cupriavidus	Cupriavidus basilensis OR16	M2061	Healthy	0.0192747
HMP2	MTG	frc	O06644	Proteobacteria	Betaproteobacteria	Burkholderiales	Oxalobacteraceae	Oxalobacter	Oxalobacter formigenes	M2061	Healthy	0.360506
HMP2	MTG	frc	Q8FFE8	Proteobacteria	Gammaproteobacteria	Enterobacterales	Enterobacteriaceae	Escherichia	Escherichia coli CFT073	M2061	Healthy	0.0334642
HMP2	MTS	frc	A0A1F3ZN52	Proteobacteria	Betaproteobacteria	NA	NA	NA	Betaproteobacteria bacterium RIFCSPLOWO2_02_FULL_6	M2061	Healthy	0.015824
HMP2	MTS	frc	C3X762	Proteobacteria	Betaproteobacteria	Burkholderiales	Oxalobacteraceae	Oxalobacter	Oxalobacter formigenes HOxBLS	M2061	Healthy	1.16305
HMP2	MTS	frc	O06644	Proteobacteria	Betaproteobacteria	Burkholderiales	Oxalobacteraceae	Oxalobacter	Oxalobacter formigenes	M2061	Healthy	0.844295
HMP2	MTG	frc	A0A072MW66	Actinobacteria	Actinobacteria	Bifidobacteriales	Bifidobacteriaceae	Bifidobacterium	Bifidobacterium pseudocatenulatum IPLA36007	M2072	Healthy	0.236194
HMP2	MTG	frc	A0A174BHB6	Actinobacteria	Actinobacteria	Bifidobacteriales	Bifidobacteriaceae	Bifidobacterium	Bifidobacterium pseudocatenulatum	M2072	Healthy	0.124652
HMP2	MTG	frc	A0A1Q6EPI6	Actinobacteria	Actinobacteria	Bifidobacteriales	Bifidobacteriaceae	Bifidobacterium	Bifidobacterium sp. 56_9_plus	M2072	Healthy	0.0862339
HMP2	MTG	frc	A0A377BTA6	Proteobacteria	Gammaproteobacteria	Enterobacterales	Enterobacteriaceae	Escherichia	Escherichia coli	M2072	Healthy	0.0816132
HMP2	MTG	frc	A1ADQ1	Proteobacteria	Gammaproteobacteria	Enterobacterales	Enterobacteriaceae	Escherichia	Escherichia coli APEC O1	M2072	Healthy	0.0777435
HMP2	MTG	frc	A0A087ADU5	Actinobacteria	Actinobacteria	Bifidobacteriales	Bifidobacteriaceae	Bifidobacterium	Bifidobacterium choerinum	M2075	Healthy	0.0260338
HMP2	MTG	frc	A0A2N5IVX1	Actinobacteria	Actinobacteria	Bifidobacteriales	Bifidobacteriaceae	Bifidobacterium	Bifidobacterium anseris	M2075	Healthy	0.0260338
HMP2	MTG	frc	A0A377BTA6	Proteobacteria	Gammaproteobacteria	Enterobacterales	Enterobacteriaceae	Escherichia	Escherichia coli	M2075	Healthy	0.470772
HMP2	MTG	frc	A1ADQ1	Proteobacteria	Gammaproteobacteria	Enterobacterales	Enterobacteriaceae	Escherichia	Escherichia coli APEC O1	M2075	Healthy	0.10495
HMP2	MTG	frc	C3X762	Proteobacteria	Betaproteobacteria	Burkholderiales	Oxalobacteraceae	Oxalobacter	Oxalobacter formigenes HOxBLS	M2075	Healthy	0.152536
HMP2	MTG	frc	H1RYM1	Proteobacteria	Betaproteobacteria	Burkholderiales	Burkholderiaceae	Cupriavidus	Cupriavidus basilensis OR16	M2075	Healthy	0.00933475
HMP2	MTG	frc	O06644	Proteobacteria	Betaproteobacteria	Burkholderiales	Oxalobacteraceae	Oxalobacter	Oxalobacter formigenes	M2075	Healthy	0.0501224
HMP2	MTS	frc	A0A1F3ZN52	Proteobacteria	Betaproteobacteria	NA	NA	NA	Betaproteobacteria bacterium RIFCSPLOWO2_02_FULL_6	M2075	Healthy	0.0298613
HMP2	MTS	frc	C3X762	Proteobacteria	Betaproteobacteria	Burkholderiales	Oxalobacteraceae	Oxalobacter	Oxalobacter formigenes HOxBLS	M2075	Healthy	0.445329
HMP2	MTS	frc	O06644	Proteobacteria	Betaproteobacteria	Burkholderiales	Oxalobacteraceae	Oxalobacter	Oxalobacter formigenes	M2075	Healthy	0.140925
HMP2	MTG	frc	A0A0L7ANW7	Proteobacteria	Gammaproteobacteria	Enterobacterales	Enterobacteriaceae	Escherichia	Escherichia coli	M2077	Healthy	0.0177699
HMP2	MTG	frc	A0A377BTA6	Proteobacteria	Gammaproteobacteria	Enterobacterales	Enterobacteriaceae	Escherichia	Escherichia coli	M2077	Healthy	0.179959
HMP2	MTG	frc	A1ADQ1	Proteobacteria	Gammaproteobacteria	Enterobacterales	Enterobacteriaceae	Escherichia	Escherichia coli APEC O1	M2077	Healthy	0.148373
HMP2	MTG	frc	B5YYX4	Proteobacteria	Gammaproteobacteria	Enterobacterales	Enterobacteriaceae	Escherichia	Escherichia coli O157:H7 str. EC4115	M2077	Healthy	0.100996
HMP2	MTS	frc	A0A377BTA6	Proteobacteria	Gammaproteobacteria	Enterobacterales	Enterobacteriaceae	Escherichia	Escherichia coli	M2077	Healthy	0.0400595
HMP2	MTG	frc	A0A072MW66	Actinobacteria	Actinobacteria	Bifidobacteriales	Bifidobacteriaceae	Bifidobacterium	Bifidobacterium pseudocatenulatum IPLA36007	M2079	Healthy	0.170319
HMP2	MTG	frc	A0A174BHB6	Actinobacteria	Actinobacteria	Bifidobacteriales	Bifidobacteriaceae	Bifidobacterium	Bifidobacterium pseudocatenulatum	M2079	Healthy	0.0243009
HMP2	MTG	frc	A0A1Q6EPI6	Actinobacteria	Actinobacteria	Bifidobacteriales	Bifidobacteriaceae	Bifidobacterium	Bifidobacterium sp. 56_9_plus	M2079	Healthy	0.1137
HMP2	MTG	frc	A0A377BTA6	Proteobacteria	Gammaproteobacteria	Enterobacterales	Enterobacteriaceae	Escherichia	Escherichia coli	M2079	Healthy	0.049106
HMP2	MTG	frc	A1ADQ1	Proteobacteria	Gammaproteobacteria	Enterobacterales	Enterobacteriaceae	Escherichia	Escherichia coli APEC O1	M2079	Healthy	0.074075
HMP2	MTG	frc	B5YYX4	Proteobacteria	Gammaproteobacteria	Enterobacterales	Enterobacteriaceae	Escherichia	Escherichia coli O157:H7 str. EC4115	M2079	Healthy	0.054677
HMP2	MTS	frc	A0A072MW66	Actinobacteria	Actinobacteria	Bifidobacteriales	Bifidobacteriaceae	Bifidobacterium	Bifidobacterium pseudocatenulatum IPLA36007	M2079	Healthy	0.107181
HMP2	MTG	frc	A0A072MW66	Actinobacteria	Actinobacteria	Bifidobacteriales	Bifidobacteriaceae	Bifidobacterium	Bifidobacterium pseudocatenulatum IPLA36007	M2084	Healthy	0.0500549
HMP2	MTG	frc	A0A377BTA6	Proteobacteria	Gammaproteobacteria	Enterobacterales	Enterobacteriaceae	Escherichia	Escherichia coli	M2084	Healthy	0.0325669
HMP2	MTG	frc	A1ADQ1	Proteobacteria	Gammaproteobacteria	Enterobacterales	Enterobacteriaceae	Escherichia	Escherichia coli APEC O1	M2084	Healthy	0.0475191
HMP2	MTG	frc	A1ADQ1	Proteobacteria	Gammaproteobacteria	Enterobacterales	Enterobacteriaceae	Escherichia	Escherichia coli APEC O1	M2097	Healthy	0.161561
HMP2	MTG	frc	C3X762	Proteobacteria	Betaproteobacteria	Burkholderiales	Oxalobacteraceae	Oxalobacter	Oxalobacter formigenes HOxBLS	M2097	Healthy	0.040432
HMP2	MTG	frc	O06644	Proteobacteria	Betaproteobacteria	Burkholderiales	Oxalobacteraceae	Oxalobacter	Oxalobacter formigenes	M2097	Healthy	0.0553123
HMP2	MTG	frc	Q8FFE8	Proteobacteria	Gammaproteobacteria	Enterobacterales	Enterobacteriaceae	Escherichia	Escherichia coli CFT073	M2097	Healthy	0.0569079
HMP2	MTS	frc	A0A1F3ZN52	Proteobacteria	Betaproteobacteria	NA	NA	NA	Betaproteobacteria bacterium RIFCSPLOWO2_02_FULL_6	M2097	Healthy	0.0348017
HMP2	MTS	frc	C3X762	Proteobacteria	Betaproteobacteria	Burkholderiales	Oxalobacteraceae	Oxalobacter	Oxalobacter formigenes HOxBLS	M2097	Healthy	0.270434
HMP2	MTS	frc	O06644	Proteobacteria	Betaproteobacteria	Burkholderiales	Oxalobacteraceae	Oxalobacter	Oxalobacter formigenes	M2097	Healthy	0.113579
HMP2	MTG	frc	A0A070SKW5	Proteobacteria	Gammaproteobacteria	Enterobacterales	Enterobacteriaceae	Escherichia	Escherichia coli 2-210-07_S3_C3	P6014	Healthy	0.209041
HMP2	MTG	frc	A0A377BTA6	Proteobacteria	Gammaproteobacteria	Enterobacterales	Enterobacteriaceae	Escherichia	Escherichia coli	P6014	Healthy	4.64536
HMP2	MTG	frc	A1ADQ1	Proteobacteria	Gammaproteobacteria	Enterobacterales	Enterobacteriaceae	Escherichia	Escherichia coli APEC O1	P6014	Healthy	2.24559
HMP2	MTG	frc	A0A072MW66	Actinobacteria	Actinobacteria	Bifidobacteriales	Bifidobacteriaceae	Bifidobacterium	Bifidobacterium pseudocatenulatum IPLA36007	P6017	Healthy	0.147251
HMP2	MTG	frc	A0A377BTA6	Proteobacteria	Gammaproteobacteria	Enterobacterales	Enterobacteriaceae	Escherichia	Escherichia coli	P6017	Healthy	0.0176274
HMP2	MTG	frc	A0A0L7ANW7	Proteobacteria	Gammaproteobacteria	Enterobacterales	Enterobacteriaceae	Escherichia	Escherichia coli	P6018	Healthy	0.0343151
HMP2	MTG	frc	A0A1Q8BQG0	Actinobacteria	Actinobacteria	Pseudonocardiales	Pseudonocardiaceae	Actinophytocola	Actinophytocola xinjiangensis	P6018	Healthy	0.0588063
HMP2	MTG	frc	A0A2X1KJL9	Proteobacteria	Gammaproteobacteria	Enterobacterales	Enterobacteriaceae	Escherichia	Escherichia coli	P6018	Healthy	0.0556929
HMP2	MTG	frc	A0A369G9R5	Proteobacteria	Gammaproteobacteria	Enterobacterales	Enterobacteriaceae	Escherichia	Escherichia coli	P6018	Healthy	0.0591112
HMP2	MTG	frc	A0A377BTA6	Proteobacteria	Gammaproteobacteria	Enterobacterales	Enterobacteriaceae	Escherichia	Escherichia coli	P6018	Healthy	0.927423
HMP2	MTG	frc	A0A379G0V5	Proteobacteria	Gammaproteobacteria	Enterobacterales	Morganellaceae	Providencia	Providencia rustigianii	P6018	Healthy	0.058133
HMP2	MTG	frc	A1ADQ1	Proteobacteria	Gammaproteobacteria	Enterobacterales	Enterobacteriaceae	Escherichia	Escherichia coli APEC O1	P6018	Healthy	2.15601
HMP2	MTG	frc	B5YYX4	Proteobacteria	Gammaproteobacteria	Enterobacterales	Enterobacteriaceae	Escherichia	Escherichia coli O157:H7 str. EC4115	P6018	Healthy	0.0591112
HMP2	MTG	frc	G1U9U4	Firmicutes	Bacilli	Lactobacillales	Lactobacillaceae	Lactobacillus	Lactobacillus acidophilus	P6018	Healthy	0.0465719
HMP2	MTG	frc	Q3YZF6	Proteobacteria	Gammaproteobacteria	Enterobacterales	Enterobacteriaceae	Shigella	Shigella sonnei Ss046	P6018	Healthy	0.0289084
HMP2	MTS	frc	A0A377BTA6	Proteobacteria	Gammaproteobacteria	Enterobacterales	Enterobacteriaceae	Escherichia	Escherichia coli	P6018	Healthy	0.348443
HMP2	MTS	frc	A1ADQ1	Proteobacteria	Gammaproteobacteria	Enterobacterales	Enterobacteriaceae	Escherichia	Escherichia coli APEC O1	P6018	Healthy	0.0620349
MetaHit	MTG	frc	A0A377BTA6	Proteobacteria	Gammaproteobacteria	Enterobacterales	Enterobacteriaceae	Escherichia	Escherichia coli	MH0002	Healthy	0.274741
MetaHit	MTG	frc	A1ADQ1	Proteobacteria	Gammaproteobacteria	Enterobacterales	Enterobacteriaceae	Escherichia	Escherichia coli APEC O1	MH0002	Healthy	0.343006
MetaHit	MTG	frc	B5YYX4	Proteobacteria	Gammaproteobacteria	Enterobacterales	Enterobacteriaceae	Escherichia	Escherichia coli O157:H7 str. EC4115	MH0002	Healthy	0.153375
MetaHit	MTG	frc	C3X762	Proteobacteria	Betaproteobacteria	Burkholderiales	Oxalobacteraceae	Oxalobacter	Oxalobacter formigenes HOxBLS	MH0002	Healthy	0.108202
MetaHit	MTG	frc	O06644	Proteobacteria	Betaproteobacteria	Burkholderiales	Oxalobacteraceae	Oxalobacter	Oxalobacter formigenes	MH0002	Healthy	0.0234223
MetaHit	MTG	frc	A0A073JPH8	Firmicutes	Bacilli	Lactobacillales	Lactobacillaceae	Lactobacillus	Lactobacillus reuteri	MH0003	Healthy	0.16868
MetaHit	MTG	frc	A0A377BTA6	Proteobacteria	Gammaproteobacteria	Enterobacterales	Enterobacteriaceae	Escherichia	Escherichia coli	MH0003	Healthy	0.36798
MetaHit	MTG	frc	A1ADQ1	Proteobacteria	Gammaproteobacteria	Enterobacterales	Enterobacteriaceae	Escherichia	Escherichia coli APEC O1	MH0003	Healthy	0.0942624
MetaHit	MTG	frc	Q8FFE8	Proteobacteria	Gammaproteobacteria	Enterobacterales	Enterobacteriaceae	Escherichia	Escherichia coli CFT073	MH0003	Healthy	0.022724
MetaHit	MTG	frc	R9WHI8	Firmicutes	Bacilli	Lactobacillales	Lactobacillaceae	Lactobacillus	Lactobacillus reuteri I5007	MH0003	Healthy	0.0265539
MetaHit	MTG	frc	A1ADQ1	Proteobacteria	Gammaproteobacteria	Enterobacterales	Enterobacteriaceae	Escherichia	Escherichia coli APEC O1	MH0006	Healthy	0.0493153
MetaHit	MTG	frc	A0A377BTA6	Proteobacteria	Gammaproteobacteria	Enterobacterales	Enterobacteriaceae	Escherichia	Escherichia coli	MH0009	Healthy	0.625159
MetaHit	MTG	frc	A1ADQ1	Proteobacteria	Gammaproteobacteria	Enterobacterales	Enterobacteriaceae	Escherichia	Escherichia coli APEC O1	MH0009	Healthy	0.112362
MetaHit	MTG	frc	C3X762	Proteobacteria	Betaproteobacteria	Burkholderiales	Oxalobacteraceae	Oxalobacter	Oxalobacter formigenes HOxBLS	MH0009	Healthy	0.0824403
MetaHit	MTG	frc	O06644	Proteobacteria	Betaproteobacteria	Burkholderiales	Oxalobacteraceae	Oxalobacter	Oxalobacter formigenes	MH0009	Healthy	0.0408349
MetaHit	MTG	frc	A0A1B1SBJ2	Bacteroidetes	Bacteroidia	Bacteroidales	Muribaculaceae	Muribaculum	Muribaculum intestinale	MH0011	Healthy	0.019631
MetaHit	MTG	frc	A0A1Q6U8Z5	Proteobacteria	Alphaproteobacteria	Rhodospirillales	Rhodospirillaceae	Azospirillum	Azospirillum sp. 51_20	MH0011	Healthy	0.202823
MetaHit	MTG	frc	C3X762	Proteobacteria	Betaproteobacteria	Burkholderiales	Oxalobacteraceae	Oxalobacter	Oxalobacter formigenes HOxBLS	MH0011	Healthy	0.0201866
MetaHit	MTG	frc	H1RYM1	Proteobacteria	Betaproteobacteria	Burkholderiales	Burkholderiaceae	Cupriavidus	Cupriavidus basilensis OR16	MH0011	Healthy	0.0101894
MetaHit	MTG	frc	A0A0D7F737	Proteobacteria	Alphaproteobacteria	Rhizobiales	Bradyrhizobiaceae	Rhodopseudomonas	Rhodopseudomonas palustris	MH0012	Healthy	0.0257746
MetaHit	MTG	frc	A0A0R1PNQ4	Firmicutes	Bacilli	Lactobacillales	Lactobacillaceae	Lactobacillus	Lactobacillus kefiranofaciens subsp. kefirgranum D	MH0012	Healthy	0.0269894
MetaHit	MTG	frc	A0A0R1VB05	Firmicutes	Bacilli	Lactobacillales	Lactobacillaceae	Lactobacillus	Lactobacillus gastricus DSM 16045	MH0012	Healthy	0.0268083
MetaHit	MTG	frc	A0A377BTA6	Proteobacteria	Gammaproteobacteria	Enterobacterales	Enterobacteriaceae	Escherichia	Escherichia coli	MH0012	Healthy	0.177282
MetaHit	MTG	frc	A1ADQ1	Proteobacteria	Gammaproteobacteria	Enterobacterales	Enterobacteriaceae	Escherichia	Escherichia coli APEC O1	MH0012	Healthy	0.165699
MetaHit	MTG	frc	A4G241	Proteobacteria	Betaproteobacteria	Burkholderiales	Oxalobacteraceae	Herminiimonas	Herminiimonas arsenicoxydans	MH0012	Healthy	0.0250892
MetaHit	MTG	frc	C3X762	Proteobacteria	Betaproteobacteria	Burkholderiales	Oxalobacteraceae	Oxalobacter	Oxalobacter formigenes HOxBLS	MH0012	Healthy	0.0810809
MetaHit	MTG	frc	O06644	Proteobacteria	Betaproteobacteria	Burkholderiales	Oxalobacteraceae	Oxalobacter	Oxalobacter formigenes	MH0012	Healthy	0.0504008
MetaHit	MTG	frc	A0A022GG59	Proteobacteria	Betaproteobacteria	Burkholderiales	Burkholderiaceae	Cupriavidus	Cupriavidus sp. SK-4	MH0014	Healthy	0.0211296
MetaHit	MTG	frc	A0A0L8QWJ2	Actinobacteria	Actinobacteria	Streptomycetales	Streptomycetaceae	Streptomyces	Streptomyces varsoviensis	MH0014	Healthy	0.0210285
MetaHit	MTG	frc	A0A0S2PGR5	Actinobacteria	Actinobacteria	Streptomycetales	Streptomycetaceae	Streptomyces	Streptomyces hygroscopicus subsp. limoneus	MH0014	Healthy	0.0208786
MetaHit	MTG	frc	A0A140NM80	Proteobacteria	Gammaproteobacteria	Enterobacterales	Morganellaceae	Providencia	Providencia stuartii MRSN 2154	MH0014	Healthy	0.0210285
MetaHit	MTG	frc	A0A1C7CW93	Proteobacteria	Gammaproteobacteria	Enterobacterales	Enterobacteriaceae	Escherichia	Escherichia coli	MH0014	Healthy	0.0210285
MetaHit	MTG	frc	A0A1Q6U8Z5	Proteobacteria	Alphaproteobacteria	Rhodospirillales	Rhodospirillaceae	Azospirillum	Azospirillum sp. 51_20	MH0014	Healthy	1.70579
MetaHit	MTG	frc	A0A209A2M1	Proteobacteria	Gammaproteobacteria	Enterobacterales	Yersiniaceae	Yersinia	Yersinia frederiksenii	MH0014	Healthy	0.512639
MetaHit	MTG	frc	A0A369DPH8	Proteobacteria	Gammaproteobacteria	Enterobacterales	Enterobacteriaceae	Escherichia	Escherichia coli	MH0014	Healthy	0.0211296
MetaHit	MTG	frc	A1ADQ1	Proteobacteria	Gammaproteobacteria	Enterobacterales	Enterobacteriaceae	Escherichia	Escherichia coli APEC O1	MH0014	Healthy	14.3355
MetaHit	MTG	frc	A0A0R1VB05	Firmicutes	Bacilli	Lactobacillales	Lactobacillaceae	Lactobacillus	Lactobacillus gastricus DSM 16045	MH0016	Healthy	0.0194234
MetaHit	MTG	frc	O06644	Proteobacteria	Betaproteobacteria	Burkholderiales	Oxalobacteraceae	Oxalobacter	Oxalobacter formigenes	MH0016	Healthy	0.0763528
MetaHit	MTG	frc	A0A377BTA6	Proteobacteria	Gammaproteobacteria	Enterobacterales	Enterobacteriaceae	Escherichia	Escherichia coli	MH0025	Healthy	0.987452
MetaHit	MTG	frc	A1ADQ1	Proteobacteria	Gammaproteobacteria	Enterobacterales	Enterobacteriaceae	Escherichia	Escherichia coli APEC O1	MH0025	Healthy	2.79966
MetaHit	MTG	frc	B5YYX4	Proteobacteria	Gammaproteobacteria	Enterobacterales	Enterobacteriaceae	Escherichia	Escherichia coli O157:H7 str. EC4115	MH0025	Healthy	0.0843138
MetaHit	MTG	frc	C3X762	Proteobacteria	Betaproteobacteria	Burkholderiales	Oxalobacteraceae	Oxalobacter	Oxalobacter formigenes HOxBLS	MH0025	Healthy	0.0275743
MetaHit	MTG	frc	A0A140NMR5	Proteobacteria	Gammaproteobacteria	Enterobacterales	Morganellaceae	Providencia	Providencia stuartii MRSN 2154	MH0032	Healthy	0.052451
MetaHit	MTG	frc	A0A1B1SBJ2	Bacteroidetes	Bacteroidia	Bacteroidales	Muribaculaceae	Muribaculum	Muribaculum intestinale	MH0032	Healthy	0.050045
MetaHit	MTG	frc	A0A2R3LY12	Proteobacteria	Gammaproteobacteria	Enterobacterales	Morganellaceae	Providencia	Providencia rettgeri	MH0032	Healthy	0.476242
MetaHit	MTG	frc	A0A2V1J0Z5	Bacteroidetes	Bacteroidia	Bacteroidales	Muribaculaceae	NA	Muribaculaceae bacterium DSM 100764	MH0032	Healthy	0.0505084
MetaHit	MTG	frc	A0A355Z7A2	Bacteroidetes	Bacteroidia	Bacteroidales	Porphyromonadaceae	NA	Porphyromonadaceae bacterium	MH0032	Healthy	0.101017
MetaHit	MTG	frc	A0A377BTA6	Proteobacteria	Gammaproteobacteria	Enterobacterales	Enterobacteriaceae	Escherichia	Escherichia coli	MH0032	Healthy	0.0989552
MetaHit	MTG	frc	A0A1B1SBJ2	Bacteroidetes	Bacteroidia	Bacteroidales	Muribaculaceae	Muribaculum	Muribaculum intestinale	MH0033	Healthy	0.0550696
MetaHit	MTG	frc	A0A2V1IPP0	Bacteroidetes	Bacteroidia	Bacteroidales	Muribaculaceae	NA	Muribaculaceae bacterium DSM 103720	MH0033	Healthy	0.0551962
MetaHit	MTG	frc	A0A2V1J0Z5	Bacteroidetes	Bacteroidia	Bacteroidales	Muribaculaceae	NA	Muribaculaceae bacterium DSM 100764	MH0033	Healthy	0.0555795
MetaHit	MTG	frc	A0A354HZG4	Bacteroidetes	Bacteroidia	Bacteroidales	Porphyromonadaceae	NA	Porphyromonadaceae bacterium	MH0033	Healthy	0.448437
MetaHit	MTG	frc	A1ADQ1	Proteobacteria	Gammaproteobacteria	Enterobacterales	Enterobacteriaceae	Escherichia	Escherichia coli APEC O1	MH0035	Healthy	0.048056
MetaHit	MTG	frc	A1ADQ1	Proteobacteria	Gammaproteobacteria	Enterobacterales	Enterobacteriaceae	Escherichia	Escherichia coli APEC O1	MH0037	Healthy	0.21506
MetaHit	MTG	frc	A0A1Q6U8Z5	Proteobacteria	Alphaproteobacteria	Rhodospirillales	Rhodospirillaceae	Azospirillum	Azospirillum sp. 51_20	MH0038	Healthy	0.491781
MetaHit	MTG	frc	A0A0D4CLJ2	Firmicutes	Bacilli	Lactobacillales	Lactobacillaceae	Lactobacillus	Lactobacillus mucosae LM1	MH0039	Healthy	0.283344
MetaHit	MTG	frc	A0A1B1SBJ2	Bacteroidetes	Bacteroidia	Bacteroidales	Muribaculaceae	Muribaculum	Muribaculum intestinale	MH0039	Healthy	0.289843
MetaHit	MTG	frc	C3X762	Proteobacteria	Betaproteobacteria	Burkholderiales	Oxalobacteraceae	Oxalobacter	Oxalobacter formigenes HOxBLS	MH0041	Healthy	0.0573598
MetaHit	MTG	frc	A0A354HZG4	Bacteroidetes	Bacteroidia	Bacteroidales	Porphyromonadaceae	NA	Porphyromonadaceae bacterium	MH0043	Healthy	0.0399652
MetaHit	MTG	frc	A0A355Z7A2	Bacteroidetes	Bacteroidia	Bacteroidales	Porphyromonadaceae	NA	Porphyromonadaceae bacterium	MH0043	Healthy	0.0398726
MetaHit	MTG	frc	C3X762	Proteobacteria	Betaproteobacteria	Burkholderiales	Oxalobacteraceae	Oxalobacter	Oxalobacter formigenes HOxBLS	MH0043	Healthy	0.040625
MetaHit	MTG	frc	A1ADQ1	Proteobacteria	Gammaproteobacteria	Enterobacterales	Enterobacteriaceae	Escherichia	Escherichia coli APEC O1	MH0044	Healthy	0.48068
MetaHit	MTG	frc	A0A1Q6U8Z5	Proteobacteria	Alphaproteobacteria	Rhodospirillales	Rhodospirillaceae	Azospirillum	Azospirillum sp. 51_20	MH0047	Healthy	0.171083
MetaHit	MTG	frc	A0A376RYR5	Proteobacteria	Gammaproteobacteria	Enterobacterales	Enterobacteriaceae	Escherichia	Escherichia coli	MH0047	Healthy	0.0548399
MetaHit	MTG	frc	A1ADQ1	Proteobacteria	Gammaproteobacteria	Enterobacterales	Enterobacteriaceae	Escherichia	Escherichia coli APEC O1	MH0047	Healthy	0.10968
MetaHit	MTG	frc	A0A2T2XHK8	Firmicutes	Clostridia	Clostridiales	Clostridiales Family XVII	Sulfobacillus	Sulfobacillus benefaciens	MH0048	Healthy	0.261945
MetaHit	MTG	frc	C3X762	Proteobacteria	Betaproteobacteria	Burkholderiales	Oxalobacteraceae	Oxalobacter	Oxalobacter formigenes HOxBLS	MH0050	Healthy	0.371892
MetaHit	MTG	frc	A0A1Q6U8Z5	Proteobacteria	Alphaproteobacteria	Rhodospirillales	Rhodospirillaceae	Azospirillum	Azospirillum sp. 51_20	MH0052	Healthy	0.253374
MetaHit	MTG	frc	A0A377BTA6	Proteobacteria	Gammaproteobacteria	Enterobacterales	Enterobacteriaceae	Escherichia	Escherichia coli	MH0052	Healthy	0.193514
MetaHit	MTG	frc	A1ADQ1	Proteobacteria	Gammaproteobacteria	Enterobacterales	Enterobacteriaceae	Escherichia	Escherichia coli APEC O1	MH0052	Healthy	0.168912
MetaHit	MTG	frc	C3X762	Proteobacteria	Betaproteobacteria	Burkholderiales	Oxalobacteraceae	Oxalobacter	Oxalobacter formigenes HOxBLS	MH0052	Healthy	0.0295405
MetaHit	MTG	frc	A0A072MW66	Actinobacteria	Actinobacteria	Bifidobacteriales	Bifidobacteriaceae	Bifidobacterium	Bifidobacterium pseudocatenulatum IPLA36007	MH0053	Healthy	0.0251462
MetaHit	MTG	frc	A0A1V8Q5N2	Actinobacteria	Actinobacteria	Bifidobacteriales	Bifidobacteriaceae	Bifidobacterium	Bifidobacterium dentium	MH0053	Healthy	0.0249155
MetaHit	MTG	frc	C3X762	Proteobacteria	Betaproteobacteria	Burkholderiales	Oxalobacteraceae	Oxalobacter	Oxalobacter formigenes HOxBLS	MH0053	Healthy	0.076862
MetaHit	MTG	frc	A0A1Z8LJF4	Proteobacteria	Alphaproteobacteria	Rhodospirillales	Rhodospirillaceae	NA	Rhodospirillaceae bacterium TMED8	MH0054	Healthy	0.0283582
MetaHit	MTG	frc	A0A377BTA6	Proteobacteria	Gammaproteobacteria	Enterobacterales	Enterobacteriaceae	Escherichia	Escherichia coli	MH0054	Healthy	0.0266863
MetaHit	MTG	frc	A1ADQ1	Proteobacteria	Gammaproteobacteria	Enterobacterales	Enterobacteriaceae	Escherichia	Escherichia coli APEC O1	MH0054	Healthy	0.484572
MetaHit	MTG	frc	A0A072MW66	Actinobacteria	Actinobacteria	Bifidobacteriales	Bifidobacteriaceae	Bifidobacterium	Bifidobacterium pseudocatenulatum IPLA36007	MH0055	Healthy	0.0904433
MetaHit	MTG	frc	A0A0R1PNQ4	Firmicutes	Bacilli	Lactobacillales	Lactobacillaceae	Lactobacillus	Lactobacillus kefiranofaciens subsp. kefirgranum D	MH0055	Healthy	0.0439994
MetaHit	MTG	frc	A0A2N3R094	Actinobacteria	Actinobacteria	Bifidobacteriales	Bifidobacteriaceae	Bifidobacterium	Bifidobacterium pseudolongum subsp. pseudolongum	MH0055	Healthy	0.0439994
MetaHit	MTG	frc	C3X762	Proteobacteria	Betaproteobacteria	Burkholderiales	Oxalobacteraceae	Oxalobacter	Oxalobacter formigenes HOxBLS	MH0055	Healthy	0.0921498
MetaHit	MTG	frc	A1ADQ1	Proteobacteria	Gammaproteobacteria	Enterobacterales	Enterobacteriaceae	Escherichia	Escherichia coli APEC O1	MH0056	Healthy	0.360205
MetaHit	MTG	frc	G1U9U4	Firmicutes	Bacilli	Lactobacillales	Lactobacillaceae	Lactobacillus	Lactobacillus acidophilus	MH0056	Healthy	0.336731
MetaHit	MTG	frc	A0A072MW66	Actinobacteria	Actinobacteria	Bifidobacteriales	Bifidobacteriaceae	Bifidobacterium	Bifidobacterium pseudocatenulatum IPLA36007	MH0058	Healthy	0.100732
MetaHit	MTG	frc	A0A1Q6U8Z5	Proteobacteria	Alphaproteobacteria	Rhodospirillales	Rhodospirillaceae	Azospirillum	Azospirillum sp. 51_20	MH0058	Healthy	0.103119
MetaHit	MTG	frc	A1ADQ1	Proteobacteria	Gammaproteobacteria	Enterobacterales	Enterobacteriaceae	Escherichia	Escherichia coli APEC O1	MH0058	Healthy	0.104606
MetaHit	MTG	frc	A1ADQ1	Proteobacteria	Gammaproteobacteria	Enterobacterales	Enterobacteriaceae	Escherichia	Escherichia coli APEC O1	MH0059	Healthy	0.290436
MetaHit	MTG	frc	A0A1Q6U8Z5	Proteobacteria	Alphaproteobacteria	Rhodospirillales	Rhodospirillaceae	Azospirillum	Azospirillum sp. 51_20	MH0060	Healthy	0.0264573
MetaHit	MTG	frc	A1ADQ1	Proteobacteria	Gammaproteobacteria	Enterobacterales	Enterobacteriaceae	Escherichia	Escherichia coli APEC O1	MH0060	Healthy	0.418616
MetaHit	MTG	frc	C3X762	Proteobacteria	Betaproteobacteria	Burkholderiales	Oxalobacteraceae	Oxalobacter	Oxalobacter formigenes HOxBLS	MH0060	Healthy	0.300144
MetaHit	MTG	frc	Q8FFE8	Proteobacteria	Gammaproteobacteria	Enterobacterales	Enterobacteriaceae	Escherichia	Escherichia coli CFT073	MH0060	Healthy	0.0536778
MetaHit	MTG	frc	A0A377BTA6	Proteobacteria	Gammaproteobacteria	Enterobacterales	Enterobacteriaceae	Escherichia	Escherichia coli	MH0061	Healthy	0.304131
MetaHit	MTG	frc	A0A1Q6U8Z5	Proteobacteria	Alphaproteobacteria	Rhodospirillales	Rhodospirillaceae	Azospirillum	Azospirillum sp. 51_20	MH0062	Healthy	0.368047
MetaHit	MTG	frc	A0A377BTA6	Proteobacteria	Gammaproteobacteria	Enterobacterales	Enterobacteriaceae	Escherichia	Escherichia coli	MH0062	Healthy	0.117397
MetaHit	MTG	frc	C3X762	Proteobacteria	Betaproteobacteria	Burkholderiales	Oxalobacteraceae	Oxalobacter	Oxalobacter formigenes HOxBLS	MH0062	Healthy	0.122104
MetaHit	MTG	frc	A0A1Q6U8Z5	Proteobacteria	Alphaproteobacteria	Rhodospirillales	Rhodospirillaceae	Azospirillum	Azospirillum sp. 51_20	MH0065	Healthy	0.112799
MetaHit	MTG	frc	A0A072MW66	Actinobacteria	Actinobacteria	Bifidobacteriales	Bifidobacteriaceae	Bifidobacterium	Bifidobacterium pseudocatenulatum IPLA36007	MH0066	Healthy	0.0570404
MetaHit	MTG	frc	A1ADQ1	Proteobacteria	Gammaproteobacteria	Enterobacterales	Enterobacteriaceae	Escherichia	Escherichia coli APEC O1	MH0068	Healthy	0.237316
MetaHit	MTG	frc	A0A1B1SBJ2	Bacteroidetes	Bacteroidia	Bacteroidales	Muribaculaceae	Muribaculum	Muribaculum intestinale	MH0069	Healthy	0.0345344
MetaHit	MTG	frc	A0A377BTA6	Proteobacteria	Gammaproteobacteria	Enterobacterales	Enterobacteriaceae	Escherichia	Escherichia coli	MH0070	Healthy	0.0910045
MetaHit	MTG	frc	C3X762	Proteobacteria	Betaproteobacteria	Burkholderiales	Oxalobacteraceae	Oxalobacter	Oxalobacter formigenes HOxBLS	MH0070	Healthy	0.0631022
MetaHit	MTG	frc	A0A377BTA6	Proteobacteria	Gammaproteobacteria	Enterobacterales	Enterobacteriaceae	Escherichia	Escherichia coli	MH0071	Healthy	0.0345464
MetaHit	MTG	frc	A1ADQ1	Proteobacteria	Gammaproteobacteria	Enterobacterales	Enterobacteriaceae	Escherichia	Escherichia coli APEC O1	MH0071	Healthy	0.109868
MetaHit	MTG	frc	C3X762	Proteobacteria	Betaproteobacteria	Burkholderiales	Oxalobacteraceae	Oxalobacter	Oxalobacter formigenes HOxBLS	MH0071	Healthy	0.0359315
MetaHit	MTG	frc	O06644	Proteobacteria	Betaproteobacteria	Burkholderiales	Oxalobacteraceae	Oxalobacter	Oxalobacter formigenes	MH0071	Healthy	0.0355957
MetaHit	MTG	frc	A0A377BTA6	Proteobacteria	Gammaproteobacteria	Enterobacterales	Enterobacteriaceae	Escherichia	Escherichia coli	MH0074	Healthy	0.392911
MetaHit	MTG	frc	A1ADQ1	Proteobacteria	Gammaproteobacteria	Enterobacterales	Enterobacteriaceae	Escherichia	Escherichia coli APEC O1	MH0074	Healthy	0.124576
MetaHit	MTG	frc	A0A1Q6U8Z5	Proteobacteria	Alphaproteobacteria	Rhodospirillales	Rhodospirillaceae	Azospirillum	Azospirillum sp. 51_20	MH0075	Healthy	0.465507
MetaHit	MTG	frc	A1ADQ1	Proteobacteria	Gammaproteobacteria	Enterobacterales	Enterobacteriaceae	Escherichia	Escherichia coli APEC O1	MH0075	Healthy	0.0393518
MetaHit	MTG	frc	C3X762	Proteobacteria	Betaproteobacteria	Burkholderiales	Oxalobacteraceae	Oxalobacter	Oxalobacter formigenes HOxBLS	MH0075	Healthy	0.0386093
MetaHit	MTG	frc	O06644	Proteobacteria	Betaproteobacteria	Burkholderiales	Oxalobacteraceae	Oxalobacter	Oxalobacter formigenes	MH0075	Healthy	0.0764969
MetaHit	MTG	frc	A0A1Q6U8Z5	Proteobacteria	Alphaproteobacteria	Rhodospirillales	Rhodospirillaceae	Azospirillum	Azospirillum sp. 51_20	MH0076	Healthy	0.0428957
MetaHit	MTG	frc	O06644	Proteobacteria	Betaproteobacteria	Burkholderiales	Oxalobacteraceae	Oxalobacter	Oxalobacter formigenes	MH0076	Healthy	0.0845888
MetaHit	MTG	frc	A0A1B1SBJ2	Bacteroidetes	Bacteroidia	Bacteroidales	Muribaculaceae	Muribaculum	Muribaculum intestinale	MH0077	Healthy	0.0394508
MetaHit	MTG	frc	A0A1Q6EIZ9	Bacteroidetes	Bacteroidia	Bacteroidales	NA	NA	Bacteroidales bacterium 52_46	MH0077	Healthy	0.255043
MetaHit	MTG	frc	A0A2V1IPP0	Bacteroidetes	Bacteroidia	Bacteroidales	Muribaculaceae	NA	Muribaculaceae bacterium DSM 103720	MH0077	Healthy	0.0790831
MetaHit	MTG	frc	A0A2V1J0Z5	Bacteroidetes	Bacteroidia	Bacteroidales	Muribaculaceae	NA	Muribaculaceae bacterium DSM 100764	MH0077	Healthy	0.119448
MetaHit	MTG	frc	A0A354HZG4	Bacteroidetes	Bacteroidia	Bacteroidales	Porphyromonadaceae	NA	Porphyromonadaceae bacterium	MH0077	Healthy	0.079817
MetaHit	MTG	frc	R5AR18	Bacteroidetes	Bacteroidia	Bacteroidales	Prevotellaceae	Prevotella	Prevotella sp. CAG:1031	MH0077	Healthy	0.0394508
MetaHit	MTG	frc	R5AXI8	Bacteroidetes	Bacteroidia	Bacteroidales	Bacteroidaceae	Bacteroides	Bacteroides sp. CAG:927	MH0077	Healthy	0.079817
MetaHit	MTG	frc	A0A377BTA6	Proteobacteria	Gammaproteobacteria	Enterobacterales	Enterobacteriaceae	Escherichia	Escherichia coli	MH0078	Healthy	0.0291795
MetaHit	MTG	frc	A1ADQ1	Proteobacteria	Gammaproteobacteria	Enterobacterales	Enterobacteriaceae	Escherichia	Escherichia coli APEC O1	MH0078	Healthy	0.115449
MetaHit	MTG	frc	A0A1Q6U8Z5	Proteobacteria	Alphaproteobacteria	Rhodospirillales	Rhodospirillaceae	Azospirillum	Azospirillum sp. 51_20	MH0079	Healthy	0.194398
MetaHit	MTG	frc	A0A377BTA6	Proteobacteria	Gammaproteobacteria	Enterobacterales	Enterobacteriaceae	Escherichia	Escherichia coli	MH0079	Healthy	0.936278
MetaHit	MTG	frc	A1ADQ1	Proteobacteria	Gammaproteobacteria	Enterobacterales	Enterobacteriaceae	Escherichia	Escherichia coli APEC O1	MH0079	Healthy	0.575196
MetaHit	MTG	frc	C3X762	Proteobacteria	Betaproteobacteria	Burkholderiales	Oxalobacteraceae	Oxalobacter	Oxalobacter formigenes HOxBLS	MH0079	Healthy	0.0226535
MetaHit	MTG	frc	O06644	Proteobacteria	Betaproteobacteria	Burkholderiales	Oxalobacteraceae	Oxalobacter	Oxalobacter formigenes	MH0079	Healthy	0.0673253
MetaHit	MTG	frc	A0A2V1J0Z5	Bacteroidetes	Bacteroidia	Bacteroidales	Muribaculaceae	NA	Muribaculaceae bacterium DSM 100764	MH0080	Healthy	0.167093
MetaHit	MTG	frc	C3X762	Proteobacteria	Betaproteobacteria	Burkholderiales	Oxalobacteraceae	Oxalobacter	Oxalobacter formigenes HOxBLS	MH0081	Healthy	0.0297607
MetaHit	MTG	frc	O06644	Proteobacteria	Betaproteobacteria	Burkholderiales	Oxalobacteraceae	Oxalobacter	Oxalobacter formigenes	MH0081	Healthy	0.0294826
MetaHit	MTG	frc	A0A1Q6EIZ9	Bacteroidetes	Bacteroidia	Bacteroidales	NA	NA	Bacteroidales bacterium 52_46	MH0082	Healthy	0.0484943
MetaHit	MTG	frc	A0A2V1IPP0	Bacteroidetes	Bacteroidia	Bacteroidales	Muribaculaceae	NA	Muribaculaceae bacterium DSM 103720	MH0082	Healthy	0.0483828
MetaHit	MTG	frc	A0A2V1J0Z5	Bacteroidetes	Bacteroidia	Bacteroidales	Muribaculaceae	NA	Muribaculaceae bacterium DSM 100764	MH0082	Healthy	0.243594
MetaHit	MTG	frc	A0A354HZG4	Bacteroidetes	Bacteroidia	Bacteroidales	Porphyromonadaceae	NA	Porphyromonadaceae bacterium	MH0082	Healthy	0.488319
MetaHit	MTG	frc	A0A355Z7A2	Bacteroidetes	Bacteroidia	Bacteroidales	Porphyromonadaceae	NA	Porphyromonadaceae bacterium	MH0082	Healthy	0.194875
MetaHit	MTG	frc	A0A377BTA6	Proteobacteria	Gammaproteobacteria	Enterobacterales	Enterobacteriaceae	Escherichia	Escherichia coli	MH0082	Healthy	0.0477246
MetaHit	MTG	frc	A1ADQ1	Proteobacteria	Gammaproteobacteria	Enterobacterales	Enterobacteriaceae	Escherichia	Escherichia coli APEC O1	MH0082	Healthy	0.101185
MetaHit	MTG	frc	R5AXI8	Bacteroidetes	Bacteroidia	Bacteroidales	Bacteroidaceae	Bacteroides	Bacteroides sp. CAG:927	MH0082	Healthy	0.146496
MetaHit	MTG	frc	A0A1B1SBJ2	Bacteroidetes	Bacteroidia	Bacteroidales	Muribaculaceae	Muribaculum	Muribaculum intestinale	MH0083	Healthy	0.162771
MetaHit	MTG	frc	A0A1Q6EIZ9	Bacteroidetes	Bacteroidia	Bacteroidales	NA	NA	Bacteroidales bacterium 52_46	MH0083	Healthy	0.0817603
MetaHit	MTG	frc	A0A2V1J0Z5	Bacteroidetes	Bacteroidia	Bacteroidales	Muribaculaceae	NA	Muribaculaceae bacterium DSM 100764	MH0083	Healthy	0.333527
MetaHit	MTG	frc	A0A354HZG4	Bacteroidetes	Bacteroidia	Bacteroidales	Porphyromonadaceae	NA	Porphyromonadaceae bacterium	MH0083	Healthy	0.503944
MetaHit	MTG	frc	A0A355Z7A2	Bacteroidetes	Bacteroidia	Bacteroidales	Porphyromonadaceae	NA	Porphyromonadaceae bacterium	MH0083	Healthy	0.0821389
MetaHit	MTG	frc	R5AXI8	Bacteroidetes	Bacteroidia	Bacteroidales	Bacteroidaceae	Bacteroides	Bacteroides sp. CAG:927	MH0083	Healthy	0.168396
MetaHit	MTG	frc	A0A072MW66	Actinobacteria	Actinobacteria	Bifidobacteriales	Bifidobacteriaceae	Bifidobacterium	Bifidobacterium pseudocatenulatum IPLA36007	MH0086	Healthy	0.386536
MetaHit	MTG	frc	A0A0L7BLA3	Actinobacteria	Actinobacteria	Bifidobacteriales	Bifidobacteriaceae	Bifidobacterium	Bifidobacterium animalis subsp. animalis MCC 0483	MH0086	Healthy	0.0198388
MetaHit	MTG	frc	A0A174BHB6	Actinobacteria	Actinobacteria	Bifidobacteriales	Bifidobacteriaceae	Bifidobacterium	Bifidobacterium pseudocatenulatum	MH0086	Healthy	0.0375581
MetaHit	MTG	frc	A0A1Q6EIZ9	Bacteroidetes	Bacteroidia	Bacteroidales	NA	NA	Bacteroidales bacterium 52_46	MH0086	Healthy	0.0202502
MetaHit	MTG	frc	A0A1Q6EPI6	Actinobacteria	Actinobacteria	Bifidobacteriales	Bifidobacteriaceae	Bifidobacterium	Bifidobacterium sp. 56_9_plus	MH0086	Healthy	0.0773633
MetaHit	MTG	frc	A0A1Q6U8Z5	Proteobacteria	Alphaproteobacteria	Rhodospirillales	Rhodospirillaceae	Azospirillum	Azospirillum sp. 51_20	MH0086	Healthy	0.318709
MetaHit	MTG	frc	A0A2V1J0Z5	Bacteroidetes	Bacteroidia	Bacteroidales	Muribaculaceae	NA	Muribaculaceae bacterium DSM 100764	MH0086	Healthy	0.040688
MetaHit	MTG	frc	A0A355Z7A2	Bacteroidetes	Bacteroidia	Bacteroidales	Porphyromonadaceae	NA	Porphyromonadaceae bacterium	MH0086	Healthy	0.040688
MetaHit	MTG	frc	A0A377BTA6	Proteobacteria	Gammaproteobacteria	Enterobacterales	Enterobacteriaceae	Escherichia	Escherichia coli	MH0086	Healthy	0.239146
MetaHit	MTG	frc	A1ADQ1	Proteobacteria	Gammaproteobacteria	Enterobacterales	Enterobacteriaceae	Escherichia	Escherichia coli APEC O1	MH0086	Healthy	0.393727
MetaHit	MTG	frc	C3X762	Proteobacteria	Betaproteobacteria	Burkholderiales	Oxalobacteraceae	Oxalobacter	Oxalobacter formigenes HOxBLS	MH0086	Healthy	0.0207278
MetaHit	MTG	frc	A0A377BTA6	Proteobacteria	Gammaproteobacteria	Enterobacterales	Enterobacteriaceae	Escherichia	Escherichia coli	MH0087	Healthy	0.880876
MetaHit	MTG	frc	A1ADQ1	Proteobacteria	Gammaproteobacteria	Enterobacterales	Enterobacteriaceae	Escherichia	Escherichia coli APEC O1	MH0087	Healthy	0.163067
MetaHit	MTG	frc	A0A1Q6U8Z5	Proteobacteria	Alphaproteobacteria	Rhodospirillales	Rhodospirillaceae	Azospirillum	Azospirillum sp. 51_20	MH0088	Healthy	0.0100774
MetaHit	MTG	frc	A0A377BTA6	Proteobacteria	Gammaproteobacteria	Enterobacterales	Enterobacteriaceae	Escherichia	Escherichia coli	MH0088	Healthy	0.0289296
MetaHit	MTG	frc	A1ADQ1	Proteobacteria	Gammaproteobacteria	Enterobacterales	Enterobacteriaceae	Escherichia	Escherichia coli APEC O1	MH0088	Healthy	0.0562249
MetaHit	MTG	frc	A0A1Q6U8Z5	Proteobacteria	Alphaproteobacteria	Rhodospirillales	Rhodospirillaceae	Azospirillum	Azospirillum sp. 51_20	MH0089	Healthy	0.17487
MetaHit	MTG	frc	A0A377BTA6	Proteobacteria	Gammaproteobacteria	Enterobacterales	Enterobacteriaceae	Escherichia	Escherichia coli	MH0089	Healthy	0.120054
MetaHit	MTG	frc	A1ADQ1	Proteobacteria	Gammaproteobacteria	Enterobacterales	Enterobacteriaceae	Escherichia	Escherichia coli APEC O1	MH0089	Healthy	0.182624
MetaHit	MTG	frc	A0A072MW66	Actinobacteria	Actinobacteria	Bifidobacteriales	Bifidobacteriaceae	Bifidobacterium	Bifidobacterium pseudocatenulatum IPLA36007	MH0090	Healthy	0.0751893
MetaHit	MTG	frc	A0A1Q6U8Z5	Proteobacteria	Alphaproteobacteria	Rhodospirillales	Rhodospirillaceae	Azospirillum	Azospirillum sp. 51_20	MH0090	Healthy	0.305546
MetaHit	MTG	frc	A0A377BTA6	Proteobacteria	Gammaproteobacteria	Enterobacterales	Enterobacteriaceae	Escherichia	Escherichia coli	MH0090	Healthy	0.299294
MetaHit	MTG	frc	A1ADQ1	Proteobacteria	Gammaproteobacteria	Enterobacterales	Enterobacteriaceae	Escherichia	Escherichia coli APEC O1	MH0090	Healthy	0.0668117
MetaHit	MTG	frc	C3X762	Proteobacteria	Betaproteobacteria	Burkholderiales	Oxalobacteraceae	Oxalobacter	Oxalobacter formigenes HOxBLS	MH0090	Healthy	0.0748391
MetaHit	MTG	frc	O06644	Proteobacteria	Betaproteobacteria	Burkholderiales	Oxalobacteraceae	Oxalobacter	Oxalobacter formigenes	MH0090	Healthy	0.153602
MetaHit	MTG	frc	A0A377BTA6	Proteobacteria	Gammaproteobacteria	Enterobacterales	Enterobacteriaceae	Escherichia	Escherichia coli	MH0091	Healthy	0.142793
MetaHit	MTG	frc	A0A1B1SBJ2	Bacteroidetes	Bacteroidia	Bacteroidales	Muribaculaceae	Muribaculum	Muribaculum intestinale	MH0092	Healthy	0.0755505
MetaHit	MTG	frc	A0A1Q6EIZ9	Bacteroidetes	Bacteroidia	Bacteroidales	NA	NA	Bacteroidales bacterium 52_46	MH0092	Healthy	0.0453542
MetaHit	MTG	frc	A0A1Q6U8Z5	Proteobacteria	Alphaproteobacteria	Rhodospirillales	Rhodospirillaceae	Azospirillum	Azospirillum sp. 51_20	MH0092	Healthy	0.0623504
MetaHit	MTG	frc	A0A355Z7A2	Bacteroidetes	Bacteroidia	Bacteroidales	Porphyromonadaceae	NA	Porphyromonadaceae bacterium	MH0092	Healthy	0.07625
MetaHit	MTG	frc	A0A0H2QXU0	Proteobacteria	Gammaproteobacteria	Enterobacterales	Morganellaceae	Moellerella	Moellerella wisconsensis	MH0093	Healthy	0.0137135
MetaHit	MTG	frc	A0A0L0ALL8	Proteobacteria	Gammaproteobacteria	Enterobacterales	Enterobacteriaceae	Klebsiella	Klebsiella sp. RIT-PI-d	MH0093	Healthy	0.229329
MetaHit	MTG	frc	A0A0L7ANW7	Proteobacteria	Gammaproteobacteria	Enterobacterales	Enterobacteriaceae	Escherichia	Escherichia coli	MH0093	Healthy	0.084555
MetaHit	MTG	frc	A0A0L8QWJ2	Actinobacteria	Actinobacteria	Streptomycetales	Streptomycetaceae	Streptomyces	Streptomyces varsoviensis	MH0093	Healthy	0.0841504
MetaHit	MTG	frc	A0A158EMY2	Proteobacteria	Betaproteobacteria	Burkholderiales	Burkholderiaceae	Caballeronia	Caballeronia sordidicola	MH0093	Healthy	0.084555
MetaHit	MTG	frc	A0A1Q6U8Z5	Proteobacteria	Alphaproteobacteria	Rhodospirillales	Rhodospirillaceae	Azospirillum	Azospirillum sp. 51_20	MH0093	Healthy	0.489053
MetaHit	MTG	frc	A0A1X2AYA3	Actinobacteria	Actinobacteria	Corynebacteriales	Mycobacteriaceae	Mycobacterium	Mycobacterium parmense	MH0093	Healthy	0.0843522
MetaHit	MTG	frc	A0A209A2M1	Proteobacteria	Gammaproteobacteria	Enterobacterales	Yersiniaceae	Yersinia	Yersinia frederiksenii	MH0093	Healthy	0.194798
MetaHit	MTG	frc	A0A2Z2J8H3	Proteobacteria	Gammaproteobacteria	Enterobacterales	Enterobacteriaceae	Escherichia	Escherichia coli	MH0093	Healthy	0.0137794
MetaHit	MTG	frc	A0A377BTA6	Proteobacteria	Gammaproteobacteria	Enterobacterales	Enterobacteriaceae	Escherichia	Escherichia coli	MH0093	Healthy	0.216403
MetaHit	MTG	frc	A1ADQ1	Proteobacteria	Gammaproteobacteria	Enterobacterales	Enterobacteriaceae	Escherichia	Escherichia coli APEC O1	MH0093	Healthy	15.7752
MetaHit	MTG	frc	A6T0J2	Proteobacteria	Betaproteobacteria	Burkholderiales	Oxalobacteraceae	Janthinobacterium	Janthinobacterium sp. Marseille	MH0093	Healthy	0.110761
MetaHit	MTG	frc	C3X762	Proteobacteria	Betaproteobacteria	Burkholderiales	Oxalobacteraceae	Oxalobacter	Oxalobacter formigenes HOxBLS	MH0094	Healthy	0.0724487
MetaHit	MTG	frc	A0A1Q6U8Z5	Proteobacteria	Alphaproteobacteria	Rhodospirillales	Rhodospirillaceae	Azospirillum	Azospirillum sp. 51_20	MH0095	Healthy	0.081322
MetaHit	MTG	frc	A0A1X2AYA3	Actinobacteria	Actinobacteria	Corynebacteriales	Mycobacteriaceae	Mycobacterium	Mycobacterium parmense	MH0095	Healthy	0.106463
MetaHit	MTG	frc	A0A377BTA6	Proteobacteria	Gammaproteobacteria	Enterobacterales	Enterobacteriaceae	Escherichia	Escherichia coli	MH0095	Healthy	13.4573
MetaHit	MTG	frc	A0A379G0V5	Proteobacteria	Gammaproteobacteria	Enterobacterales	Morganellaceae	Providencia	Providencia rustigianii	MH0095	Healthy	0.0130064
MetaHit	MTG	frc	A1ADQ1	Proteobacteria	Gammaproteobacteria	Enterobacterales	Enterobacteriaceae	Escherichia	Escherichia coli APEC O1	MH0095	Healthy	2.96874
MetaHit	MTG	frc	C3X762	Proteobacteria	Betaproteobacteria	Burkholderiales	Oxalobacteraceae	Oxalobacter	Oxalobacter formigenes HOxBLS	MH0095	Healthy	0.0809384
MetaHit	MTG	frc	A0A028EDB1	Proteobacteria	Gammaproteobacteria	Enterobacterales	Enterobacteriaceae	Escherichia	Escherichia coli O118:H16 str. 2009C-4446	MH0097	Healthy	0.501063
MetaHit	MTG	frc	A0A1I1DMD5	Proteobacteria	Betaproteobacteria	Burkholderiales	Oxalobacteraceae	Collimonas	Collimonas sp. OK412	MH0097	Healthy	0.00854269
MetaHit	MTG	frc	A0A1Q6U8Z5	Proteobacteria	Alphaproteobacteria	Rhodospirillales	Rhodospirillaceae	Azospirillum	Azospirillum sp. 51_20	MH0097	Healthy	0.0171259
MetaHit	MTG	frc	A0A209A2M1	Proteobacteria	Gammaproteobacteria	Enterobacterales	Yersiniaceae	Yersinia	Yersinia frederiksenii	MH0097	Healthy	0.0175842
MetaHit	MTG	frc	A0A377BTA6	Proteobacteria	Gammaproteobacteria	Enterobacterales	Enterobacteriaceae	Escherichia	Escherichia coli	MH0097	Healthy	1.39625
MetaHit	MTG	frc	A1ADQ1	Proteobacteria	Gammaproteobacteria	Enterobacterales	Enterobacteriaceae	Escherichia	Escherichia coli APEC O1	MH0097	Healthy	6.3823
MetaHit	MTG	frc	A6T0J2	Proteobacteria	Betaproteobacteria	Burkholderiales	Oxalobacteraceae	Janthinobacterium	Janthinobacterium sp. Marseille	MH0097	Healthy	0.491395
MetaHit	MTG	frc	C3X2D4	Proteobacteria	Betaproteobacteria	Burkholderiales	Oxalobacteraceae	Oxalobacter	Oxalobacter formigenes HOxBLS	MH0097	Healthy	0.0428147
MetaHit	MTG	frc	C3X762	Proteobacteria	Betaproteobacteria	Burkholderiales	Oxalobacteraceae	Oxalobacter	Oxalobacter formigenes HOxBLS	MH0097	Healthy	0.273659
MetaHit	MTG	frc	H1RYM1	Proteobacteria	Betaproteobacteria	Burkholderiales	Burkholderiaceae	Cupriavidus	Cupriavidus basilensis OR16	MH0097	Healthy	0.00430186
MetaHit	MTG	frc	A0A377BTA6	Proteobacteria	Gammaproteobacteria	Enterobacterales	Enterobacteriaceae	Escherichia	Escherichia coli	MH0098	Healthy	0.0411533
MetaHit	MTG	frc	C3X762	Proteobacteria	Betaproteobacteria	Burkholderiales	Oxalobacteraceae	Oxalobacter	Oxalobacter formigenes HOxBLS	MH0098	Healthy	0.0660392
MetaHit	MTG	frc	O06644	Proteobacteria	Betaproteobacteria	Burkholderiales	Oxalobacteraceae	Oxalobacter	Oxalobacter formigenes	MH0098	Healthy	0.0356853
MetaHit	MTG	frc	A0A1B1SBJ2	Bacteroidetes	Bacteroidia	Bacteroidales	Muribaculaceae	Muribaculum	Muribaculum intestinale	MH0099	Healthy	0.162493
MetaHit	MTG	frc	A0A1Q6EIZ9	Bacteroidetes	Bacteroidia	Bacteroidales	NA	NA	Bacteroidales bacterium 52_46	MH0099	Healthy	0.403108
MetaHit	MTG	frc	A0A1Q6U8Z5	Proteobacteria	Alphaproteobacteria	Rhodospirillales	Rhodospirillaceae	Azospirillum	Azospirillum sp. 51_20	MH0099	Healthy	0.694805
MetaHit	MTG	frc	A0A2V1J0Z5	Bacteroidetes	Bacteroidia	Bacteroidales	Muribaculaceae	NA	Muribaculaceae bacterium DSM 100764	MH0099	Healthy	0.233979
MetaHit	MTG	frc	A0A355Z7A2	Bacteroidetes	Bacteroidia	Bacteroidales	Porphyromonadaceae	NA	Porphyromonadaceae bacterium	MH0099	Healthy	0.0219833
MetaHit	MTG	frc	A0A1Q6U8Z5	Proteobacteria	Alphaproteobacteria	Rhodospirillales	Rhodospirillaceae	Azospirillum	Azospirillum sp. 51_20	MH0100	Healthy	1.64834
MetaHit	MTG	frc	A0A2W5RAA1	Proteobacteria	Alphaproteobacteria	Rhizobiales	Xanthobacteraceae	Starkeya	Starkeya novella	MH0100	Healthy	0.0527528
MetaHit	MTG	frc	A0A377BTA6	Proteobacteria	Gammaproteobacteria	Enterobacterales	Enterobacteriaceae	Escherichia	Escherichia coli	MH0100	Healthy	0.0388804
MetaHit	MTG	frc	C3X762	Proteobacteria	Betaproteobacteria	Burkholderiales	Oxalobacteraceae	Oxalobacter	Oxalobacter formigenes HOxBLS	MH0100	Healthy	0.145778
MetaHit	MTG	frc	O06644	Proteobacteria	Betaproteobacteria	Burkholderiales	Oxalobacteraceae	Oxalobacter	Oxalobacter formigenes	MH0100	Healthy	0.0465804
MetaHit	MTG	frc	A0A2V1IPP0	Bacteroidetes	Bacteroidia	Bacteroidales	Muribaculaceae	NA	Muribaculaceae bacterium DSM 103720	MH0101	Healthy	0.126273
MetaHit	MTG	frc	A0A2V1J0Z5	Bacteroidetes	Bacteroidia	Bacteroidales	Muribaculaceae	NA	Muribaculaceae bacterium DSM 100764	MH0101	Healthy	0.0904182
MetaHit	MTG	frc	A0A354HZG4	Bacteroidetes	Bacteroidia	Bacteroidales	Porphyromonadaceae	NA	Porphyromonadaceae bacterium	MH0101	Healthy	0.034712
MetaHit	MTG	frc	A0A377BTA6	Proteobacteria	Gammaproteobacteria	Enterobacterales	Enterobacteriaceae	Escherichia	Escherichia coli	MH0101	Healthy	0.0169624
MetaHit	MTG	frc	A1ADQ1	Proteobacteria	Gammaproteobacteria	Enterobacterales	Enterobacteriaceae	Escherichia	Escherichia coli APEC O1	MH0101	Healthy	0.309991
MetaHit	MTG	frc	C3X762	Proteobacteria	Betaproteobacteria	Burkholderiales	Oxalobacteraceae	Oxalobacter	Oxalobacter formigenes HOxBLS	MH0101	Healthy	0.118776
MetaHit	MTG	frc	O06644	Proteobacteria	Betaproteobacteria	Burkholderiales	Oxalobacteraceae	Oxalobacter	Oxalobacter formigenes	MH0101	Healthy	0.0665466
MetaHit	MTG	frc	R5AXI8	Bacteroidetes	Bacteroidia	Bacteroidales	Bacteroidaceae	Bacteroides	Bacteroides sp. CAG:927	MH0101	Healthy	0.309303
MetaHit	MTG	frc	A1ADQ1	Proteobacteria	Gammaproteobacteria	Enterobacterales	Enterobacteriaceae	Escherichia	Escherichia coli APEC O1	MH0102	Healthy	0.174199
MetaHit	MTG	frc	R5AXI8	Bacteroidetes	Bacteroidia	Bacteroidales	Bacteroidaceae	Bacteroides	Bacteroides sp. CAG:927	MH0103	Healthy	0.10133
MetaHit	MTG	frc	A0A377BTA6	Proteobacteria	Gammaproteobacteria	Enterobacterales	Enterobacteriaceae	Escherichia	Escherichia coli	MH0104	Healthy	0.146171
MetaHit	MTG	frc	A1ADQ1	Proteobacteria	Gammaproteobacteria	Enterobacterales	Enterobacteriaceae	Escherichia	Escherichia coli APEC O1	MH0104	Healthy	0.279625
MetaHit	MTG	frc	C3X762	Proteobacteria	Betaproteobacteria	Burkholderiales	Oxalobacteraceae	Oxalobacter	Oxalobacter formigenes HOxBLS	MH0104	Healthy	0.0345073
MetaHit	MTG	frc	A0A0R1UNQ7	Firmicutes	Bacilli	Lactobacillales	Lactobacillaceae	Lactobacillus	Lactobacillus equigenerosi DSM 18793 = JCM 14505	MH0105	Healthy	0.0183039
MetaHit	MTG	frc	A0A377BTA6	Proteobacteria	Gammaproteobacteria	Enterobacterales	Enterobacteriaceae	Escherichia	Escherichia coli	MH0105	Healthy	0.103476
MetaHit	MTG	frc	A1ADQ1	Proteobacteria	Gammaproteobacteria	Enterobacterales	Enterobacteriaceae	Escherichia	Escherichia coli APEC O1	MH0105	Healthy	0.0932948
MetaHit	MTG	frc	B7MY33	Proteobacteria	Gammaproteobacteria	Enterobacterales	Enterobacteriaceae	Escherichia	Escherichia coli ED1a	MH0105	Healthy	0.109694
MetaHit	MTG	frc	A0A1B1SBJ2	Bacteroidetes	Bacteroidia	Bacteroidales	Muribaculaceae	Muribaculum	Muribaculum intestinale	MH0106	Healthy	0.0127197
MetaHit	MTG	frc	A0A1Q6EIZ9	Bacteroidetes	Bacteroidia	Bacteroidales	NA	NA	Bacteroidales bacterium 52_46	MH0106	Healthy	0.0127783
MetaHit	MTG	frc	A0A1Q6U8Z5	Proteobacteria	Alphaproteobacteria	Rhodospirillales	Rhodospirillaceae	Azospirillum	Azospirillum sp. 51_20	MH0106	Healthy	0.0875905
MetaHit	MTG	frc	A0A2V1IPP0	Bacteroidetes	Bacteroidia	Bacteroidales	Muribaculaceae	NA	Muribaculaceae bacterium DSM 103720	MH0106	Healthy	0.0127489
MetaHit	MTG	frc	A0A2V1J0Z5	Bacteroidetes	Bacteroidia	Bacteroidales	Muribaculaceae	NA	Muribaculaceae bacterium DSM 100764	MH0106	Healthy	0.0384797
MetaHit	MTG	frc	A0A2X5G0L0	Proteobacteria	Gammaproteobacteria	Enterobacterales	Enterobacteriaceae	Escherichia	Escherichia coli	MH0106	Healthy	0.0760625
MetaHit	MTG	frc	A0A354HZG4	Bacteroidetes	Bacteroidia	Bacteroidales	Porphyromonadaceae	NA	Porphyromonadaceae bacterium	MH0106	Healthy	0.0908615
MetaHit	MTG	frc	A0A355Z7A2	Bacteroidetes	Bacteroidia	Bacteroidales	Porphyromonadaceae	NA	Porphyromonadaceae bacterium	MH0106	Healthy	0.0448821
MetaHit	MTG	frc	A0A377BTA6	Proteobacteria	Gammaproteobacteria	Enterobacterales	Enterobacteriaceae	Escherichia	Escherichia coli	MH0106	Healthy	0.128925
MetaHit	MTG	frc	A1ADQ1	Proteobacteria	Gammaproteobacteria	Enterobacterales	Enterobacteriaceae	Escherichia	Escherichia coli APEC O1	MH0106	Healthy	0.135736
MetaHit	MTG	frc	C3X762	Proteobacteria	Betaproteobacteria	Burkholderiales	Oxalobacteraceae	Oxalobacter	Oxalobacter formigenes HOxBLS	MH0106	Healthy	0.100411
MetaHit	MTG	frc	H1RYM1	Proteobacteria	Betaproteobacteria	Burkholderiales	Burkholderiaceae	Cupriavidus	Cupriavidus basilensis OR16	MH0106	Healthy	0.0230822
MetaHit	MTG	frc	O06644	Proteobacteria	Betaproteobacteria	Burkholderiales	Oxalobacteraceae	Oxalobacter	Oxalobacter formigenes	MH0106	Healthy	0.0618942
MetaHit	MTG	frc	A0A1F3ZN52	Proteobacteria	Betaproteobacteria	NA	NA	NA	Betaproteobacteria bacterium RIFCSPLOWO2_02_FULL_6	MH0107	Healthy	0.109736
MetaHit	MTG	frc	A0A1Q6U8Z5	Proteobacteria	Alphaproteobacteria	Rhodospirillales	Rhodospirillaceae	Azospirillum	Azospirillum sp. 51_20	MH0107	Healthy	0.171714
MetaHit	MTG	frc	C3X2D4	Proteobacteria	Betaproteobacteria	Burkholderiales	Oxalobacteraceae	Oxalobacter	Oxalobacter formigenes HOxBLS	MH0107	Healthy	0.110256
MetaHit	MTG	frc	C3X762	Proteobacteria	Betaproteobacteria	Burkholderiales	Oxalobacteraceae	Oxalobacter	Oxalobacter formigenes HOxBLS	MH0107	Healthy	0.0701115
MetaHit	MTG	frc	O06644	Proteobacteria	Betaproteobacteria	Burkholderiales	Oxalobacteraceae	Oxalobacter	Oxalobacter formigenes	MH0107	Healthy	0.110583
MetaHit	MTG	frc	A0A072MW66	Actinobacteria	Actinobacteria	Bifidobacteriales	Bifidobacteriaceae	Bifidobacterium	Bifidobacterium pseudocatenulatum IPLA36007	MH0110	Healthy	0.017883
MetaHit	MTG	frc	A0A087ADU5	Actinobacteria	Actinobacteria	Bifidobacteriales	Bifidobacteriaceae	Bifidobacterium	Bifidobacterium choerinum	MH0110	Healthy	0.0260996
MetaHit	MTG	frc	A0A087B567	Actinobacteria	Actinobacteria	Bifidobacteriales	Bifidobacteriaceae	Bifidobacterium	Bifidobacterium cuniculi	MH0110	Healthy	0.0477342
MetaHit	MTG	frc	A0A087QB11	Firmicutes	Bacilli	Lactobacillales	Lactobacillaceae	Lactobacillus	Lactobacillus gasseri SV-16A-US	MH0110	Healthy	0.0488803
MetaHit	MTG	frc	A0A1V8Q5N2	Actinobacteria	Actinobacteria	Bifidobacteriales	Bifidobacteriaceae	Bifidobacterium	Bifidobacterium dentium	MH0110	Healthy	0.102581
MetaHit	MTG	frc	C3X762	Proteobacteria	Betaproteobacteria	Burkholderiales	Oxalobacteraceae	Oxalobacter	Oxalobacter formigenes HOxBLS	MH0110	Healthy	0.055145
MetaHit	MTG	frc	A0A1Q6U8Z5	Proteobacteria	Alphaproteobacteria	Rhodospirillales	Rhodospirillaceae	Azospirillum	Azospirillum sp. 51_20	MH0111	Healthy	0.0561436
MetaHit	MTG	frc	A0A1Q6U8Z5	Proteobacteria	Alphaproteobacteria	Rhodospirillales	Rhodospirillaceae	Azospirillum	Azospirillum sp. 51_20	MH0113	Healthy	1.73714
MetaHit	MTG	frc	C3X762	Proteobacteria	Betaproteobacteria	Burkholderiales	Oxalobacteraceae	Oxalobacter	Oxalobacter formigenes HOxBLS	MH0113	Healthy	0.0973292
MetaHit	MTG	frc	A0A1Q6U8Z5	Proteobacteria	Alphaproteobacteria	Rhodospirillales	Rhodospirillaceae	Azospirillum	Azospirillum sp. 51_20	MH0115	Healthy	0.330514
MetaHit	MTG	frc	C3X762	Proteobacteria	Betaproteobacteria	Burkholderiales	Oxalobacteraceae	Oxalobacter	Oxalobacter formigenes HOxBLS	MH0115	Healthy	0.0363713
MetaHit	MTG	frc	O06644	Proteobacteria	Betaproteobacteria	Burkholderiales	Oxalobacteraceae	Oxalobacter	Oxalobacter formigenes	MH0115	Healthy	0.0360313
MetaHit	MTG	frc	A0A087ADU5	Actinobacteria	Actinobacteria	Bifidobacteriales	Bifidobacteriaceae	Bifidobacterium	Bifidobacterium choerinum	MH0116	Healthy	0.00823036
MetaHit	MTG	frc	A0A0D4CLJ2	Firmicutes	Bacilli	Lactobacillales	Lactobacillaceae	Lactobacillus	Lactobacillus mucosae LM1	MH0116	Healthy	0.00819345
MetaHit	MTG	frc	A0A1B1SBJ2	Bacteroidetes	Bacteroidia	Bacteroidales	Muribaculaceae	Muribaculum	Muribaculum intestinale	MH0116	Healthy	0.179842
MetaHit	MTG	frc	A0A1Q6EIZ9	Bacteroidetes	Bacteroidia	Bacteroidales	NA	NA	Bacteroidales bacterium 52_46	MH0116	Healthy	0.161444
MetaHit	MTG	frc	A0A1Q6U8Z5	Proteobacteria	Alphaproteobacteria	Rhodospirillales	Rhodospirillaceae	Azospirillum	Azospirillum sp. 51_20	MH0116	Healthy	0.00865943
MetaHit	MTG	frc	A0A2V1IPP0	Bacteroidetes	Bacteroidia	Bacteroidales	Muribaculaceae	NA	Muribaculaceae bacterium DSM 103720	MH0116	Healthy	0.198019
MetaHit	MTG	frc	A0A2V1J0Z5	Bacteroidetes	Bacteroidia	Bacteroidales	Muribaculaceae	NA	Muribaculaceae bacterium DSM 100764	MH0116	Healthy	0.649884
MetaHit	MTG	frc	A0A354HZG4	Bacteroidetes	Bacteroidia	Bacteroidales	Porphyromonadaceae	NA	Porphyromonadaceae bacterium	MH0116	Healthy	0.806867
MetaHit	MTG	frc	A0A355Z7A2	Bacteroidetes	Bacteroidia	Bacteroidales	Porphyromonadaceae	NA	Porphyromonadaceae bacterium	MH0116	Healthy	0.179739
MetaHit	MTG	frc	A1ADQ1	Proteobacteria	Gammaproteobacteria	Enterobacterales	Enterobacteriaceae	Escherichia	Escherichia coli APEC O1	MH0116	Healthy	0.00878432
MetaHit	MTG	frc	R5AR18	Bacteroidetes	Bacteroidia	Bacteroidales	Prevotellaceae	Prevotella	Prevotella sp. CAG:1031	MH0116	Healthy	0.183541
MetaHit	MTG	frc	R5AXI8	Bacteroidetes	Bacteroidia	Bacteroidales	Bacteroidaceae	Bacteroides	Bacteroides sp. CAG:927	MH0116	Healthy	0.234529
MetaHit	MTG	frc	A1ADQ1	Proteobacteria	Gammaproteobacteria	Enterobacterales	Enterobacteriaceae	Escherichia	Escherichia coli APEC O1	MH0117	Healthy	0.102749
MetaHit	MTG	frc	C3X762	Proteobacteria	Betaproteobacteria	Burkholderiales	Oxalobacteraceae	Oxalobacter	Oxalobacter formigenes HOxBLS	MH0117	Healthy	0.267722
MetaHit	MTG	frc	O06644	Proteobacteria	Betaproteobacteria	Burkholderiales	Oxalobacteraceae	Oxalobacter	Oxalobacter formigenes	MH0117	Healthy	0.16639
MetaHit	MTG	frc	A0A0D7F737	Proteobacteria	Alphaproteobacteria	Rhizobiales	Bradyrhizobiaceae	Rhodopseudomonas	Rhodopseudomonas palustris	MH0118	Healthy	0.0232123
MetaHit	MTG	frc	C3X762	Proteobacteria	Betaproteobacteria	Burkholderiales	Oxalobacteraceae	Oxalobacter	Oxalobacter formigenes HOxBLS	MH0118	Healthy	0.397286
MetaHit	MTG	frc	O06644	Proteobacteria	Betaproteobacteria	Burkholderiales	Oxalobacteraceae	Oxalobacter	Oxalobacter formigenes	MH0118	Healthy	0.115089
MetaHit	MTG	frc	A0A1B1SBJ2	Bacteroidetes	Bacteroidia	Bacteroidales	Muribaculaceae	Muribaculum	Muribaculum intestinale	MH0119	Healthy	0.00689766
MetaHit	MTG	frc	A0A1Q6U8Z5	Proteobacteria	Alphaproteobacteria	Rhodospirillales	Rhodospirillaceae	Azospirillum	Azospirillum sp. 51_20	MH0119	Healthy	0.160346
MetaHit	MTG	frc	A0A1F4IAS5	Proteobacteria	Betaproteobacteria	Burkholderiales	NA	NA	Burkholderiales bacterium RIFCSPHIGHO2_12_FULL_61_	MH0120	Healthy	0.182898
MetaHit	MTG	frc	A0A377BTA6	Proteobacteria	Gammaproteobacteria	Enterobacterales	Enterobacteriaceae	Escherichia	Escherichia coli	MH0120	Healthy	0.0632061
MetaHit	MTG	frc	A1ADQ1	Proteobacteria	Gammaproteobacteria	Enterobacterales	Enterobacteriaceae	Escherichia	Escherichia coli APEC O1	MH0120	Healthy	0.0162603
MetaHit	MTG	frc	C3X762	Proteobacteria	Betaproteobacteria	Burkholderiales	Oxalobacteraceae	Oxalobacter	Oxalobacter formigenes HOxBLS	MH0120	Healthy	0.087312
MetaHit	MTG	frc	O06644	Proteobacteria	Betaproteobacteria	Burkholderiales	Oxalobacteraceae	Oxalobacter	Oxalobacter formigenes	MH0120	Healthy	0.070394
MetaHit	MTG	frc	A0A028EDB1	Proteobacteria	Gammaproteobacteria	Enterobacterales	Enterobacteriaceae	Escherichia	Escherichia coli O118:H16 str. 2009C-4446	MH0121	Healthy	0.00572282
MetaHit	MTG	frc	A0A070SKW5	Proteobacteria	Gammaproteobacteria	Enterobacterales	Enterobacteriaceae	Escherichia	Escherichia coli 2-210-07_S3_C3	MH0121	Healthy	0.121464
MetaHit	MTG	frc	A0A080IWR8	Proteobacteria	Gammaproteobacteria	Enterobacterales	Enterobacteriaceae	Escherichia	Escherichia coli 1-250-04_S3_C2	MH0121	Healthy	0.0060732
MetaHit	MTG	frc	A0A087QB11	Firmicutes	Bacilli	Lactobacillales	Lactobacillaceae	Lactobacillus	Lactobacillus gasseri SV-16A-US	MH0121	Healthy	0.00526702
MetaHit	MTG	frc	A0A0H2QFH1	Proteobacteria	Gammaproteobacteria	Enterobacterales	Morganellaceae	Moellerella	Moellerella wisconsensis	MH0121	Healthy	0.00572282
MetaHit	MTG	frc	A0A0K4YN22	Proteobacteria	Gammaproteobacteria	Enterobacterales	Enterobacteriaceae	Escherichia	Escherichia coli	MH0121	Healthy	0.00572282
MetaHit	MTG	frc	A0A0L0ALL8	Proteobacteria	Gammaproteobacteria	Enterobacterales	Enterobacteriaceae	Klebsiella	Klebsiella sp. RIT-PI-d	MH0121	Healthy	0.0228913
MetaHit	MTG	frc	A0A1B1WGN2	Actinobacteria	Actinobacteria	Corynebacteriales	Mycobacteriaceae	Mycobacterium	Mycobacterium sp. djl-10	MH0121	Healthy	0.0055754
MetaHit	MTG	frc	A0A1E3N450	Proteobacteria	Gammaproteobacteria	Enterobacterales	Enterobacteriaceae	Shigella	Shigella sp. FC569	MH0121	Healthy	0.00572282
MetaHit	MTG	frc	A0A1J0DQ32	Proteobacteria	Betaproteobacteria	Burkholderiales	Burkholderiaceae	Polynucleobacter	Polynucleobacter asymbioticus	MH0121	Healthy	0.00572282
MetaHit	MTG	frc	A0A1X2AYA3	Actinobacteria	Actinobacteria	Corynebacteriales	Mycobacteriaceae	Mycobacterium	Mycobacterium parmense	MH0121	Healthy	0.0057091
MetaHit	MTG	frc	A0A209A2M1	Proteobacteria	Gammaproteobacteria	Enterobacterales	Yersiniaceae	Yersinia	Yersinia frederiksenii	MH0121	Healthy	0.00579244
MetaHit	MTG	frc	A0A377BTA6	Proteobacteria	Gammaproteobacteria	Enterobacterales	Enterobacteriaceae	Escherichia	Escherichia coli	MH0121	Healthy	9.7873
MetaHit	MTG	frc	A1ADQ1	Proteobacteria	Gammaproteobacteria	Enterobacterales	Enterobacteriaceae	Escherichia	Escherichia coli APEC O1	MH0121	Healthy	7.84027
MetaHit	MTG	frc	A0A087ADU5	Actinobacteria	Actinobacteria	Bifidobacteriales	Bifidobacteriaceae	Bifidobacterium	Bifidobacterium choerinum	MH0122	Healthy	0.0653963
MetaHit	MTG	frc	A0A087QB11	Firmicutes	Bacilli	Lactobacillales	Lactobacillaceae	Lactobacillus	Lactobacillus gasseri SV-16A-US	MH0122	Healthy	0.0109114
MetaHit	MTG	frc	G1U9U4	Firmicutes	Bacilli	Lactobacillales	Lactobacillaceae	Lactobacillus	Lactobacillus acidophilus	MH0122	Healthy	0.0499944
MetaHit	MTG	frc	A0A1Q6U8Z5	Proteobacteria	Alphaproteobacteria	Rhodospirillales	Rhodospirillaceae	Azospirillum	Azospirillum sp. 51_20	MH0123	Healthy	0.421821
MetaHit	MTG	frc	A0A377BTA6	Proteobacteria	Gammaproteobacteria	Enterobacterales	Enterobacteriaceae	Escherichia	Escherichia coli	MH0123	Healthy	0.0633357
MetaHit	MTG	frc	C3X2D4	Proteobacteria	Betaproteobacteria	Burkholderiales	Oxalobacteraceae	Oxalobacter	Oxalobacter formigenes HOxBLS	MH0123	Healthy	0.072251
MetaHit	MTG	frc	C3X762	Proteobacteria	Betaproteobacteria	Burkholderiales	Oxalobacteraceae	Oxalobacter	Oxalobacter formigenes HOxBLS	MH0123	Healthy	0.0977632
MetaHit	MTG	frc	O06644	Proteobacteria	Betaproteobacteria	Burkholderiales	Oxalobacteraceae	Oxalobacter	Oxalobacter formigenes	MH0123	Healthy	0.0658156
MetaHit	MTG	frc	A0A1B1SBJ2	Bacteroidetes	Bacteroidia	Bacteroidales	Muribaculaceae	Muribaculum	Muribaculum intestinale	MH0124	Healthy	0.241447
MetaHit	MTG	frc	A0A1F3ZN52	Proteobacteria	Betaproteobacteria	NA	NA	NA	Betaproteobacteria bacterium RIFCSPLOWO2_02_FULL_6	MH0124	Healthy	0.0651495
MetaHit	MTG	frc	A0A1Q6EIZ9	Bacteroidetes	Bacteroidia	Bacteroidales	NA	NA	Bacteroidales bacterium 52_46	MH0124	Healthy	0.0934703
MetaHit	MTG	frc	A0A1Q6U8Z5	Proteobacteria	Alphaproteobacteria	Rhodospirillales	Rhodospirillaceae	Azospirillum	Azospirillum sp. 51_20	MH0124	Healthy	0.322735
MetaHit	MTG	frc	A0A2D3D410	Actinobacteria	Actinobacteria	Bifidobacteriales	Bifidobacteriaceae	Bifidobacterium	Bifidobacterium choerinum	MH0124	Healthy	0.0622148
MetaHit	MTG	frc	A0A2V1IPP0	Bacteroidetes	Bacteroidia	Bacteroidales	Muribaculaceae	NA	Muribaculaceae bacterium DSM 103720	MH0124	Healthy	0.101364
MetaHit	MTG	frc	A0A2V1J0Z5	Bacteroidetes	Bacteroidia	Bacteroidales	Muribaculaceae	NA	Muribaculaceae bacterium DSM 100764	MH0124	Healthy	0.195756
MetaHit	MTG	frc	A0A354HZG4	Bacteroidetes	Bacteroidia	Bacteroidales	Porphyromonadaceae	NA	Porphyromonadaceae bacterium	MH0124	Healthy	0.0126372
MetaHit	MTG	frc	A0A377BTA6	Proteobacteria	Gammaproteobacteria	Enterobacterales	Enterobacteriaceae	Escherichia	Escherichia coli	MH0124	Healthy	0.139449
MetaHit	MTG	frc	A1ADQ1	Proteobacteria	Gammaproteobacteria	Enterobacterales	Enterobacteriaceae	Escherichia	Escherichia coli APEC O1	MH0124	Healthy	0.537489
MetaHit	MTG	frc	C3X762	Proteobacteria	Betaproteobacteria	Burkholderiales	Oxalobacteraceae	Oxalobacter	Oxalobacter formigenes HOxBLS	MH0124	Healthy	0.121735
MetaHit	MTG	frc	O06644	Proteobacteria	Betaproteobacteria	Burkholderiales	Oxalobacteraceae	Oxalobacter	Oxalobacter formigenes	MH0124	Healthy	0.083024
MetaHit	MTG	frc	R5AXI8	Bacteroidetes	Bacteroidia	Bacteroidales	Bacteroidaceae	Bacteroides	Bacteroides sp. CAG:927	MH0124	Healthy	0.083568
MetaHit	MTG	frc	A0A2W5RAA1	Proteobacteria	Alphaproteobacteria	Rhizobiales	Xanthobacteraceae	Starkeya	Starkeya novella	MH0125	Healthy	0.0747046
MetaHit	MTG	frc	C3X2D4	Proteobacteria	Betaproteobacteria	Burkholderiales	Oxalobacteraceae	Oxalobacter	Oxalobacter formigenes HOxBLS	MH0125	Healthy	0.0454829
MetaHit	MTG	frc	C3X762	Proteobacteria	Betaproteobacteria	Burkholderiales	Oxalobacteraceae	Oxalobacter	Oxalobacter formigenes HOxBLS	MH0125	Healthy	0.133921
MetaHit	MTG	frc	O06644	Proteobacteria	Betaproteobacteria	Burkholderiales	Oxalobacteraceae	Oxalobacter	Oxalobacter formigenes	MH0125	Healthy	0.131436
MetaHit	MTG	frc	A0A062XDE4	Firmicutes	Bacilli	Lactobacillales	Lactobacillaceae	Lactobacillus	Lactobacillus animalis	MH0126	Healthy	0.0723027
MetaHit	MTG	frc	A0A1B1SBJ2	Bacteroidetes	Bacteroidia	Bacteroidales	Muribaculaceae	Muribaculum	Muribaculum intestinale	MH0126	Healthy	0.074956
MetaHit	MTG	frc	A0A1Q6U8Z5	Proteobacteria	Alphaproteobacteria	Rhodospirillales	Rhodospirillaceae	Azospirillum	Azospirillum sp. 51_20	MH0126	Healthy	0.0533104
MetaHit	MTG	frc	A0A2V1IPP0	Bacteroidetes	Bacteroidia	Bacteroidales	Muribaculaceae	NA	Muribaculaceae bacterium DSM 103720	MH0126	Healthy	0.0557853
MetaHit	MTG	frc	A0A355Z7A2	Bacteroidetes	Bacteroidia	Bacteroidales	Porphyromonadaceae	NA	Porphyromonadaceae bacterium	MH0126	Healthy	0.0653441
MetaHit	MTG	frc	A0A377BTA6	Proteobacteria	Gammaproteobacteria	Enterobacterales	Enterobacteriaceae	Escherichia	Escherichia coli	MH0126	Healthy	0.0647876
MetaHit	MTG	frc	A1ADQ1	Proteobacteria	Gammaproteobacteria	Enterobacterales	Enterobacteriaceae	Escherichia	Escherichia coli APEC O1	MH0126	Healthy	0.0127617
MetaHit	MTG	frc	C3X762	Proteobacteria	Betaproteobacteria	Burkholderiales	Oxalobacteraceae	Oxalobacter	Oxalobacter formigenes HOxBLS	MH0126	Healthy	0.161917
MetaHit	MTG	frc	O06644	Proteobacteria	Betaproteobacteria	Burkholderiales	Oxalobacteraceae	Oxalobacter	Oxalobacter formigenes	MH0126	Healthy	0.0936185
MetaHit	MTG	frc	A0A072MW66	Actinobacteria	Actinobacteria	Bifidobacteriales	Bifidobacteriaceae	Bifidobacterium	Bifidobacterium pseudocatenulatum IPLA36007	MH0127	Healthy	0.071306
MetaHit	MTG	frc	A0A072MW66	Actinobacteria	Actinobacteria	Bifidobacteriales	Bifidobacteriaceae	Bifidobacterium	Bifidobacterium pseudocatenulatum IPLA36007	MH0128	Healthy	0.0107913
MetaHit	MTG	frc	A0A174BHB6	Actinobacteria	Actinobacteria	Bifidobacteriales	Bifidobacteriaceae	Bifidobacterium	Bifidobacterium pseudocatenulatum	MH0128	Healthy	0.00996119
MetaHit	MTG	frc	A0A072MW66	Actinobacteria	Actinobacteria	Bifidobacteriales	Bifidobacteriaceae	Bifidobacterium	Bifidobacterium pseudocatenulatum IPLA36007	MH0129	Healthy	0.324903
MetaHit	MTG	frc	A0A174BHB6	Actinobacteria	Actinobacteria	Bifidobacteriales	Bifidobacteriaceae	Bifidobacterium	Bifidobacterium pseudocatenulatum	MH0129	Healthy	0.0913246
MetaHit	MTG	frc	A0A1Q6U8Z5	Proteobacteria	Alphaproteobacteria	Rhodospirillales	Rhodospirillaceae	Azospirillum	Azospirillum sp. 51_20	MH0129	Healthy	2.03703
MetaHit	MTG	frc	A0A2V1IPP0	Bacteroidetes	Bacteroidia	Bacteroidales	Muribaculaceae	NA	Muribaculaceae bacterium DSM 103720	MH0130	Healthy	0.0119652
MetaHit	MTG	frc	A0A2V1J0Z5	Bacteroidetes	Bacteroidia	Bacteroidales	Muribaculaceae	NA	Muribaculaceae bacterium DSM 100764	MH0130	Healthy	0.0120483
MetaHit	MTG	frc	A0A354HZG4	Bacteroidetes	Bacteroidia	Bacteroidales	Porphyromonadaceae	NA	Porphyromonadaceae bacterium	MH0130	Healthy	0.0552713
MetaHit	MTG	frc	A0A072MW66	Actinobacteria	Actinobacteria	Bifidobacteriales	Bifidobacteriaceae	Bifidobacterium	Bifidobacterium pseudocatenulatum IPLA36007	MH0131	Healthy	0.00376881
MetaHit	MTG	frc	A0A087ADU5	Actinobacteria	Actinobacteria	Bifidobacteriales	Bifidobacteriaceae	Bifidobacterium	Bifidobacterium choerinum	MH0131	Healthy	0.00366695
MetaHit	MTG	frc	A0A1Q6U8Z5	Proteobacteria	Alphaproteobacteria	Rhodospirillales	Rhodospirillaceae	Azospirillum	Azospirillum sp. 51_20	MH0131	Healthy	0.0115743
MetaHit	MTG	frc	A0A1V8Q5N2	Actinobacteria	Actinobacteria	Bifidobacteriales	Bifidobacteriaceae	Bifidobacterium	Bifidobacterium dentium	MH0131	Healthy	0.00373423
MetaHit	MTG	frc	A1ADQ1	Proteobacteria	Gammaproteobacteria	Enterobacterales	Enterobacteriaceae	Escherichia	Escherichia coli APEC O1	MH0131	Healthy	0.0117413
MetaHit	MTG	frc	C3X762	Proteobacteria	Betaproteobacteria	Burkholderiales	Oxalobacteraceae	Oxalobacter	Oxalobacter formigenes HOxBLS	MH0131	Healthy	0.00383992
MetaHit	MTG	frc	Q8FFE8	Proteobacteria	Gammaproteobacteria	Enterobacterales	Enterobacteriaceae	Escherichia	Escherichia coli CFT073	MH0131	Healthy	0.00391376
MetaHit	MTG	frc	A0A0S8F3S8	Proteobacteria	Deltaproteobacteria	Myxococcales	NA	NA	Myxococcales bacterium SG8_38_1	MH0132	Healthy	0.082236
MetaHit	MTG	frc	C3X762	Proteobacteria	Betaproteobacteria	Burkholderiales	Oxalobacteraceae	Oxalobacter	Oxalobacter formigenes HOxBLS	MH0132	Healthy	0.148123
MetaHit	MTG	frc	H1RYM1	Proteobacteria	Betaproteobacteria	Burkholderiales	Burkholderiaceae	Cupriavidus	Cupriavidus basilensis OR16	MH0132	Healthy	0.0421145
MetaHit	MTG	frc	O06644	Proteobacteria	Betaproteobacteria	Burkholderiales	Oxalobacteraceae	Oxalobacter	Oxalobacter formigenes	MH0132	Healthy	0.16601
MetaHit	MTG	frc	A0A377BTA6	Proteobacteria	Gammaproteobacteria	Enterobacterales	Enterobacteriaceae	Escherichia	Escherichia coli	MH0133	Healthy	0.140892
MetaHit	MTG	frc	A1ADQ1	Proteobacteria	Gammaproteobacteria	Enterobacterales	Enterobacteriaceae	Escherichia	Escherichia coli APEC O1	MH0133	Healthy	0.0187782
MetaHit	MTG	frc	A0A072MW66	Actinobacteria	Actinobacteria	Bifidobacteriales	Bifidobacteriaceae	Bifidobacterium	Bifidobacterium pseudocatenulatum IPLA36007	MH0134	Healthy	0.224895
MetaHit	MTG	frc	A0A377BTA6	Proteobacteria	Gammaproteobacteria	Enterobacterales	Enterobacteriaceae	Escherichia	Escherichia coli	MH0134	Healthy	0.131827
MetaHit	MTG	frc	A1ADQ1	Proteobacteria	Gammaproteobacteria	Enterobacterales	Enterobacteriaceae	Escherichia	Escherichia coli APEC O1	MH0134	Healthy	0.135778
MetaHit	MTG	frc	D2Q6H4	Actinobacteria	Actinobacteria	Bifidobacteriales	Bifidobacteriaceae	Bifidobacterium	Bifidobacterium dentium Bd1	MH0134	Healthy	0.0902486
MetaHit	MTG	frc	A0A1Q6U8Z5	Proteobacteria	Alphaproteobacteria	Rhodospirillales	Rhodospirillaceae	Azospirillum	Azospirillum sp. 51_20	MH0135	Healthy	1.33719
MetaHit	MTG	frc	A0A377BTA6	Proteobacteria	Gammaproteobacteria	Enterobacterales	Enterobacteriaceae	Escherichia	Escherichia coli	MH0135	Healthy	0.0169237
MetaHit	MTG	frc	A1ADQ1	Proteobacteria	Gammaproteobacteria	Enterobacterales	Enterobacteriaceae	Escherichia	Escherichia coli APEC O1	MH0135	Healthy	0.218076
MetaHit	MTG	frc	C3X762	Proteobacteria	Betaproteobacteria	Burkholderiales	Oxalobacteraceae	Oxalobacter	Oxalobacter formigenes HOxBLS	MH0135	Healthy	0.0999928
MetaHit	MTG	frc	H1RYM1	Proteobacteria	Betaproteobacteria	Burkholderiales	Burkholderiaceae	Cupriavidus	Cupriavidus basilensis OR16	MH0135	Healthy	0.0511602
MetaHit	MTG	frc	O06644	Proteobacteria	Betaproteobacteria	Burkholderiales	Oxalobacteraceae	Oxalobacter	Oxalobacter formigenes	MH0135	Healthy	0.0990583
MetaHit	MTG	frc	C3X762	Proteobacteria	Betaproteobacteria	Burkholderiales	Oxalobacteraceae	Oxalobacter	Oxalobacter formigenes HOxBLS	MH0138	Healthy	0.00531897
MetaHit	MTG	frc	O06644	Proteobacteria	Betaproteobacteria	Burkholderiales	Oxalobacteraceae	Oxalobacter	Oxalobacter formigenes	MH0138	Healthy	0.0105385
MetaHit	MTG	frc	A0A377BTA6	Proteobacteria	Gammaproteobacteria	Enterobacterales	Enterobacteriaceae	Escherichia	Escherichia coli	MH0139	Healthy	0.0095792
MetaHit	MTG	frc	A1ADQ1	Proteobacteria	Gammaproteobacteria	Enterobacterales	Enterobacteriaceae	Escherichia	Escherichia coli APEC O1	MH0139	Healthy	0.00338496
MetaHit	MTG	frc	A0A1B1SBJ2	Bacteroidetes	Bacteroidia	Bacteroidales	Muribaculaceae	Muribaculum	Muribaculum intestinale	MH0140	Healthy	0.0100539
MetaHit	MTG	frc	A0A1Q6EIZ9	Bacteroidetes	Bacteroidia	Bacteroidales	NA	NA	Bacteroidales bacterium 52_46	MH0140	Healthy	0.0673351
MetaHit	MTG	frc	A0A355Z7A2	Bacteroidetes	Bacteroidia	Bacteroidales	Porphyromonadaceae	NA	Porphyromonadaceae bacterium	MH0140	Healthy	0.010147
MetaHit	MTG	frc	A0A377BTA6	Proteobacteria	Gammaproteobacteria	Enterobacterales	Enterobacteriaceae	Escherichia	Escherichia coli	MH0140	Healthy	0.00331331
MetaHit	MTG	frc	A1ADQ1	Proteobacteria	Gammaproteobacteria	Enterobacterales	Enterobacteriaceae	Escherichia	Escherichia coli APEC O1	MH0140	Healthy	0.207233
MetaHit	MTG	frc	C3X762	Proteobacteria	Betaproteobacteria	Burkholderiales	Oxalobacteraceae	Oxalobacter	Oxalobacter formigenes HOxBLS	MH0140	Healthy	0.0275693
MetaHit	MTG	frc	O06644	Proteobacteria	Betaproteobacteria	Burkholderiales	Oxalobacteraceae	Oxalobacter	Oxalobacter formigenes	MH0140	Healthy	0.0136558
MetaHit	MTG	frc	R5AR18	Bacteroidetes	Bacteroidia	Bacteroidales	Prevotellaceae	Prevotella	Prevotella sp. CAG:1031	MH0140	Healthy	0.147458
MetaHit	MTG	frc	A0A1Q6U8Z5	Proteobacteria	Alphaproteobacteria	Rhodospirillales	Rhodospirillaceae	Azospirillum	Azospirillum sp. 51_20	MH0141	Healthy	0.0192007
MetaHit	MTG	frc	A0A377BTA6	Proteobacteria	Gammaproteobacteria	Enterobacterales	Enterobacteriaceae	Escherichia	Escherichia coli	MH0141	Healthy	0.128615
MetaHit	MTG	frc	A1ADQ1	Proteobacteria	Gammaproteobacteria	Enterobacterales	Enterobacteriaceae	Escherichia	Escherichia coli APEC O1	MH0141	Healthy	0.233732
MetaHit	MTG	frc	A0A072MW66	Actinobacteria	Actinobacteria	Bifidobacteriales	Bifidobacteriaceae	Bifidobacterium	Bifidobacterium pseudocatenulatum IPLA36007	MH0142	Healthy	0.0094826
MetaHit	MTG	frc	A0A1Q6U8Z5	Proteobacteria	Alphaproteobacteria	Rhodospirillales	Rhodospirillaceae	Azospirillum	Azospirillum sp. 51_20	MH0142	Healthy	1.21341
MetaHit	MTG	frc	A0A377BTA6	Proteobacteria	Gammaproteobacteria	Enterobacterales	Enterobacteriaceae	Escherichia	Escherichia coli	MH0142	Healthy	0.0836017
MetaHit	MTG	frc	A1ADQ1	Proteobacteria	Gammaproteobacteria	Enterobacterales	Enterobacteriaceae	Escherichia	Escherichia coli APEC O1	MH0142	Healthy	0.0295419
MetaHit	MTG	frc	A0A174S0X3	Firmicutes	Clostridia	Clostridiales	Clostridiaceae	Clostridium	Clostridium baratii	MH0143	Healthy	0.00889722
MetaHit	MTG	frc	A0A1B1SBJ2	Bacteroidetes	Bacteroidia	Bacteroidales	Muribaculaceae	Muribaculum	Muribaculum intestinale	MH0143	Healthy	0.0172639
MetaHit	MTG	frc	A0A1Q6U8Z5	Proteobacteria	Alphaproteobacteria	Rhodospirillales	Rhodospirillaceae	Azospirillum	Azospirillum sp. 51_20	MH0143	Healthy	0.142693
MetaHit	MTG	frc	A0A2V1IPP0	Bacteroidetes	Bacteroidia	Bacteroidales	Muribaculaceae	NA	Muribaculaceae bacterium DSM 103720	MH0143	Healthy	0.0346071
MetaHit	MTG	frc	A0A2V1J0Z5	Bacteroidetes	Bacteroidia	Bacteroidales	Muribaculaceae	NA	Muribaculaceae bacterium DSM 100764	MH0143	Healthy	0.0261356
MetaHit	MTG	frc	A0A354HZG4	Bacteroidetes	Bacteroidia	Bacteroidales	Porphyromonadaceae	NA	Porphyromonadaceae bacterium	MH0143	Healthy	0.0174641
MetaHit	MTG	frc	A0A355Z7A2	Bacteroidetes	Bacteroidia	Bacteroidales	Porphyromonadaceae	NA	Porphyromonadaceae bacterium	MH0143	Healthy	0.0522712
MetaHit	MTG	frc	A0A377BTA6	Proteobacteria	Gammaproteobacteria	Enterobacterales	Enterobacteriaceae	Escherichia	Escherichia coli	MH0143	Healthy	0.0426703
MetaHit	MTG	frc	A1ADQ1	Proteobacteria	Gammaproteobacteria	Enterobacterales	Enterobacteriaceae	Escherichia	Escherichia coli APEC O1	MH0143	Healthy	0.0361877
MetaHit	MTG	frc	C3X762	Proteobacteria	Betaproteobacteria	Burkholderiales	Oxalobacteraceae	Oxalobacter	Oxalobacter formigenes HOxBLS	MH0143	Healthy	0.0976386
MetaHit	MTG	frc	O06644	Proteobacteria	Betaproteobacteria	Burkholderiales	Oxalobacteraceae	Oxalobacter	Oxalobacter formigenes	MH0143	Healthy	0.0351731
MetaHit	MTG	frc	R5AXI8	Bacteroidetes	Bacteroidia	Bacteroidales	Bacteroidaceae	Bacteroides	Bacteroides sp. CAG:927	MH0143	Healthy	0.0261962
MetaHit	MTG	frc	A0A1F3ZN52	Proteobacteria	Betaproteobacteria	NA	NA	NA	Betaproteobacteria bacterium RIFCSPLOWO2_02_FULL_6	MH0144	Healthy	0.0167566
MetaHit	MTG	frc	A0A1Q6U8Z5	Proteobacteria	Alphaproteobacteria	Rhodospirillales	Rhodospirillaceae	Azospirillum	Azospirillum sp. 51_20	MH0144	Healthy	0.55559
MetaHit	MTG	frc	A0A377BTA6	Proteobacteria	Gammaproteobacteria	Enterobacterales	Enterobacteriaceae	Escherichia	Escherichia coli	MH0144	Healthy	0.024166
MetaHit	MTG	frc	C3X762	Proteobacteria	Betaproteobacteria	Burkholderiales	Oxalobacteraceae	Oxalobacter	Oxalobacter formigenes HOxBLS	MH0144	Healthy	0.125675
MetaHit	MTG	frc	O06644	Proteobacteria	Betaproteobacteria	Burkholderiales	Oxalobacteraceae	Oxalobacter	Oxalobacter formigenes	MH0144	Healthy	0.0581001
MetaHit	MTG	frc	A0A1Q6U8Z5	Proteobacteria	Alphaproteobacteria	Rhodospirillales	Rhodospirillaceae	Azospirillum	Azospirillum sp. 51_20	MH0145	Healthy	0.793945
MetaHit	MTG	frc	A0A377BTA6	Proteobacteria	Gammaproteobacteria	Enterobacterales	Enterobacteriaceae	Escherichia	Escherichia coli	MH0145	Healthy	0.0223202
MetaHit	MTG	frc	A1ADQ1	Proteobacteria	Gammaproteobacteria	Enterobacterales	Enterobacteriaceae	Escherichia	Escherichia coli APEC O1	MH0145	Healthy	0.282886
MetaHit	MTG	frc	C3X762	Proteobacteria	Betaproteobacteria	Burkholderiales	Oxalobacteraceae	Oxalobacter	Oxalobacter formigenes HOxBLS	MH0145	Healthy	0.0965002
MetaHit	MTG	frc	H1RYM1	Proteobacteria	Betaproteobacteria	Burkholderiales	Burkholderiaceae	Cupriavidus	Cupriavidus basilensis OR16	MH0145	Healthy	0.0126367
MetaHit	MTG	frc	O06644	Proteobacteria	Betaproteobacteria	Burkholderiales	Oxalobacteraceae	Oxalobacter	Oxalobacter formigenes	MH0145	Healthy	0.0114991
MetaHit	MTG	frc	C3X762	Proteobacteria	Betaproteobacteria	Burkholderiales	Oxalobacteraceae	Oxalobacter	Oxalobacter formigenes HOxBLS	MH0146	Healthy	0.020323
MetaHit	MTG	frc	O06644	Proteobacteria	Betaproteobacteria	Burkholderiales	Oxalobacteraceae	Oxalobacter	Oxalobacter formigenes	MH0146	Healthy	0.020133
MetaHit	MTG	frc	A0A1Q6U8Z5	Proteobacteria	Alphaproteobacteria	Rhodospirillales	Rhodospirillaceae	Azospirillum	Azospirillum sp. 51_20	MH0147	Healthy	0.0775731
MetaHit	MTG	frc	A1ADQ1	Proteobacteria	Gammaproteobacteria	Enterobacterales	Enterobacteriaceae	Escherichia	Escherichia coli APEC O1	MH0147	Healthy	0.083648
MetaHit	MTG	frc	C3X762	Proteobacteria	Betaproteobacteria	Burkholderiales	Oxalobacteraceae	Oxalobacter	Oxalobacter formigenes HOxBLS	MH0147	Healthy	0.0772072
MetaHit	MTG	frc	A0A377BTA6	Proteobacteria	Gammaproteobacteria	Enterobacterales	Enterobacteriaceae	Escherichia	Escherichia coli	MH0149	Healthy	0.0249299
MetaHit	MTG	frc	A1ADQ1	Proteobacteria	Gammaproteobacteria	Enterobacterales	Enterobacteriaceae	Escherichia	Escherichia coli APEC O1	MH0149	Healthy	0.0528561
MetaHit	MTG	frc	C3X762	Proteobacteria	Betaproteobacteria	Burkholderiales	Oxalobacteraceae	Oxalobacter	Oxalobacter formigenes HOxBLS	MH0149	Healthy	0.0777883
MetaHit	MTG	frc	O06644	Proteobacteria	Betaproteobacteria	Burkholderiales	Oxalobacteraceae	Oxalobacter	Oxalobacter formigenes	MH0149	Healthy	0.0256871
MetaHit	MTG	frc	A0A1Q6U8Z5	Proteobacteria	Alphaproteobacteria	Rhodospirillales	Rhodospirillaceae	Azospirillum	Azospirillum sp. 51_20	MH0150	Healthy	0.725797
MetaHit	MTG	frc	C3X762	Proteobacteria	Betaproteobacteria	Burkholderiales	Oxalobacteraceae	Oxalobacter	Oxalobacter formigenes HOxBLS	MH0150	Healthy	0.108113
MetaHit	MTG	frc	H1RYM1	Proteobacteria	Betaproteobacteria	Burkholderiales	Burkholderiaceae	Cupriavidus	Cupriavidus basilensis OR16	MH0150	Healthy	0.0109143
MetaHit	MTG	frc	O06644	Proteobacteria	Betaproteobacteria	Burkholderiales	Oxalobacteraceae	Oxalobacter	Oxalobacter formigenes	MH0150	Healthy	0.0642615
MetaHit	MTG	frc	A0A377BTA6	Proteobacteria	Gammaproteobacteria	Enterobacterales	Enterobacteriaceae	Escherichia	Escherichia coli	MH0151	Healthy	0.0233721
MetaHit	MTG	frc	A1ADQ1	Proteobacteria	Gammaproteobacteria	Enterobacterales	Enterobacteriaceae	Escherichia	Escherichia coli APEC O1	MH0151	Healthy	0.0247767
MetaHit	MTG	frc	A0A0S8F3S8	Proteobacteria	Deltaproteobacteria	Myxococcales	NA	NA	Myxococcales bacterium SG8_38_1	MH0153	Healthy	0.0137378
MetaHit	MTG	frc	A0A377BTA6	Proteobacteria	Gammaproteobacteria	Enterobacterales	Enterobacteriaceae	Escherichia	Escherichia coli	MH0153	Healthy	0.131771
MetaHit	MTG	frc	A1ADQ1	Proteobacteria	Gammaproteobacteria	Enterobacterales	Enterobacteriaceae	Escherichia	Escherichia coli APEC O1	MH0153	Healthy	0.0279379
MetaHit	MTG	frc	C3X762	Proteobacteria	Betaproteobacteria	Burkholderiales	Oxalobacteraceae	Oxalobacter	Oxalobacter formigenes HOxBLS	MH0153	Healthy	0.0822323
MetaHit	MTG	frc	O06644	Proteobacteria	Betaproteobacteria	Burkholderiales	Oxalobacteraceae	Oxalobacter	Oxalobacter formigenes	MH0153	Healthy	0.0814638
MetaHit	MTG	frc	A0A0L7ANW7	Proteobacteria	Gammaproteobacteria	Enterobacterales	Enterobacteriaceae	Escherichia	Escherichia coli	MH0154	Healthy	0.015215
MetaHit	MTG	frc	A0A377BTA6	Proteobacteria	Gammaproteobacteria	Enterobacterales	Enterobacteriaceae	Escherichia	Escherichia coli	MH0154	Healthy	1.1482
MetaHit	MTG	frc	A1ADQ1	Proteobacteria	Gammaproteobacteria	Enterobacterales	Enterobacteriaceae	Escherichia	Escherichia coli APEC O1	MH0154	Healthy	0.623814
MetaHit	MTG	frc	C3X762	Proteobacteria	Betaproteobacteria	Burkholderiales	Oxalobacteraceae	Oxalobacter	Oxalobacter formigenes HOxBLS	MH0154	Healthy	0.0149279
MetaHit	MTG	frc	O06644	Proteobacteria	Betaproteobacteria	Burkholderiales	Oxalobacteraceae	Oxalobacter	Oxalobacter formigenes	MH0154	Healthy	0.0147884
MetaHit	MTG	frc	A0A072MW66	Actinobacteria	Actinobacteria	Bifidobacteriales	Bifidobacteriaceae	Bifidobacterium	Bifidobacterium pseudocatenulatum IPLA36007	MH0156	Healthy	0.0130616
MetaHit	MTG	frc	A0A377BTA6	Proteobacteria	Gammaproteobacteria	Enterobacterales	Enterobacteriaceae	Escherichia	Escherichia coli	MH0156	Healthy	0.0255901
MetaHit	MTG	frc	A1ADQ1	Proteobacteria	Gammaproteobacteria	Enterobacterales	Enterobacteriaceae	Escherichia	Escherichia coli APEC O1	MH0156	Healthy	0.027128
MetaHit	MTG	frc	A0A087QB11	Firmicutes	Bacilli	Lactobacillales	Lactobacillaceae	Lactobacillus	Lactobacillus gasseri SV-16A-US	MH0157	Healthy	0.0140656
MetaHit	MTG	frc	A1ADQ1	Proteobacteria	Gammaproteobacteria	Enterobacterales	Enterobacteriaceae	Escherichia	Escherichia coli APEC O1	MH0157	Healthy	0.0152828
MetaHit	MTG	frc	C3X762	Proteobacteria	Betaproteobacteria	Burkholderiales	Oxalobacteraceae	Oxalobacter	Oxalobacter formigenes HOxBLS	MH0157	Healthy	0.179934
MetaHit	MTG	frc	O06644	Proteobacteria	Betaproteobacteria	Burkholderiales	Oxalobacteraceae	Oxalobacter	Oxalobacter formigenes	MH0157	Healthy	0.133689
MetaHit	MTG	frc	A0A1B1SBJ2	Bacteroidetes	Bacteroidia	Bacteroidales	Muribaculaceae	Muribaculum	Muribaculum intestinale	MH0158	Healthy	0.0575167
MetaHit	MTG	frc	A0A2V1J0Z5	Bacteroidetes	Bacteroidia	Bacteroidales	Muribaculaceae	NA	Muribaculaceae bacterium DSM 100764	MH0158	Healthy	0.116099
MetaHit	MTG	frc	A0A354HZG4	Bacteroidetes	Bacteroidia	Bacteroidales	Porphyromonadaceae	NA	Porphyromonadaceae bacterium	MH0158	Healthy	0.14546
MetaHit	MTG	frc	A0A355Z7A2	Bacteroidetes	Bacteroidia	Bacteroidales	Porphyromonadaceae	NA	Porphyromonadaceae bacterium	MH0158	Healthy	0.0725616
MetaHit	MTG	frc	A0A377BTA6	Proteobacteria	Gammaproteobacteria	Enterobacterales	Enterobacteriaceae	Escherichia	Escherichia coli	MH0158	Healthy	0.0284323
MetaHit	MTG	frc	A1ADQ1	Proteobacteria	Gammaproteobacteria	Enterobacterales	Enterobacteriaceae	Escherichia	Escherichia coli APEC O1	MH0158	Healthy	0.0452114
MetaHit	MTG	frc	R5AR18	Bacteroidetes	Bacteroidia	Bacteroidales	Prevotellaceae	Prevotella	Prevotella sp. CAG:1031	MH0158	Healthy	0.0143792
MetaHit	MTG	frc	A0A1V8Q5N2	Actinobacteria	Actinobacteria	Bifidobacteriales	Bifidobacteriaceae	Bifidobacterium	Bifidobacterium dentium	MH0159	Healthy	0.112682
MetaHit	MTG	frc	A0A2I6E5X4	Proteobacteria	Gammaproteobacteria	Enterobacterales	Enterobacteriaceae	Enterobacter	Enterobacter cancerogenus	MH0159	Healthy	0.0147624
MetaHit	MTG	frc	A0A369G9R5	Proteobacteria	Gammaproteobacteria	Enterobacterales	Enterobacteriaceae	Escherichia	Escherichia coli	MH0159	Healthy	0.0147624
MetaHit	MTG	frc	A0A377BTA6	Proteobacteria	Gammaproteobacteria	Enterobacterales	Enterobacteriaceae	Escherichia	Escherichia coli	MH0159	Healthy	0.208883
MetaHit	MTG	frc	A1ADQ1	Proteobacteria	Gammaproteobacteria	Enterobacterales	Enterobacteriaceae	Escherichia	Escherichia coli APEC O1	MH0159	Healthy	2.43579
MetaHit	MTG	frc	Q8FFE8	Proteobacteria	Gammaproteobacteria	Enterobacterales	Enterobacteriaceae	Escherichia	Escherichia coli CFT073	MH0159	Healthy	0.295248
MetaHit	MTG	frc	A1ADQ1	Proteobacteria	Gammaproteobacteria	Enterobacterales	Enterobacteriaceae	Escherichia	Escherichia coli APEC O1	MH0160	Healthy	0.0864294
MetaHit	MTG	frc	A1ADQ1	Proteobacteria	Gammaproteobacteria	Enterobacterales	Enterobacteriaceae	Escherichia	Escherichia coli APEC O1	MH0161	Healthy	0.00881843
MetaHit	MTG	frc	C3X762	Proteobacteria	Betaproteobacteria	Burkholderiales	Oxalobacteraceae	Oxalobacter	Oxalobacter formigenes HOxBLS	MH0161	Healthy	0.00865204
MetaHit	MTG	frc	A0A099YDY1	Firmicutes	Bacilli	Lactobacillales	Lactobacillaceae	Lactobacillus	Lactobacillus mucosae	MH0163	Healthy	0.0809797
MetaHit	MTG	frc	A1ADQ1	Proteobacteria	Gammaproteobacteria	Enterobacterales	Enterobacteriaceae	Escherichia	Escherichia coli APEC O1	MH0163	Healthy	1.03453
MetaHit	MTG	frc	C3X762	Proteobacteria	Betaproteobacteria	Burkholderiales	Oxalobacteraceae	Oxalobacter	Oxalobacter formigenes HOxBLS	MH0163	Healthy	0.095531
MetaHit	MTG	frc	O06644	Proteobacteria	Betaproteobacteria	Burkholderiales	Oxalobacteraceae	Oxalobacter	Oxalobacter formigenes	MH0163	Healthy	0.0189276
MetaHit	MTG	frc	A0A0R1UH43	Firmicutes	Bacilli	Lactobacillales	Lactobacillaceae	Lactobacillus	Lactobacillus kalixensis DSM 16043	MH0164	Healthy	0.0123244
MetaHit	MTG	frc	C3X762	Proteobacteria	Betaproteobacteria	Burkholderiales	Oxalobacteraceae	Oxalobacter	Oxalobacter formigenes HOxBLS	MH0165	Healthy	0.08929
MetaHit	MTG	frc	A0A377BTA6	Proteobacteria	Gammaproteobacteria	Enterobacterales	Enterobacteriaceae	Escherichia	Escherichia coli	MH0167	Healthy	0.0774743
MetaHit	MTG	frc	A0A0D4CLJ2	Firmicutes	Bacilli	Lactobacillales	Lactobacillaceae	Lactobacillus	Lactobacillus mucosae LM1	MH0168	Healthy	0.0390249
MetaHit	MTG	frc	A0A0S8F3S8	Proteobacteria	Deltaproteobacteria	Myxococcales	NA	NA	Myxococcales bacterium SG8_38_1	MH0168	Healthy	0.0946068
MetaHit	MTG	frc	A0A174S0X3	Firmicutes	Clostridia	Clostridiales	Clostridiaceae	Clostridium	Clostridium baratii	MH0168	Healthy	0.0678768
MetaHit	MTG	frc	A0A1B1SBJ2	Bacteroidetes	Bacteroidia	Bacteroidales	Muribaculaceae	Muribaculum	Muribaculum intestinale	MH0168	Healthy	0.146208
MetaHit	MTG	frc	A0A1F3ZN52	Proteobacteria	Betaproteobacteria	NA	NA	NA	Betaproteobacteria bacterium RIFCSPLOWO2_02_FULL_6	MH0168	Healthy	0.0954631
MetaHit	MTG	frc	A0A1Q6EIZ9	Bacteroidetes	Bacteroidia	Bacteroidales	NA	NA	Bacteroidales bacterium 52_46	MH0168	Healthy	0.0939143
MetaHit	MTG	frc	A0A1V8NT80	Proteobacteria	Gammaproteobacteria	Enterobacterales	Enterobacteriaceae	Citrobacter	Citrobacter braakii	MH0168	Healthy	0.0984512
MetaHit	MTG	frc	A0A1V8Q5N2	Actinobacteria	Actinobacteria	Bifidobacteriales	Bifidobacteriaceae	Bifidobacterium	Bifidobacterium dentium	MH0168	Healthy	0.0917859
MetaHit	MTG	frc	A0A2V1IPP0	Bacteroidetes	Bacteroidia	Bacteroidales	Muribaculaceae	NA	Muribaculaceae bacterium DSM 103720	MH0168	Healthy	0.182965
MetaHit	MTG	frc	A0A2V1J0Z5	Bacteroidetes	Bacteroidia	Bacteroidales	Muribaculaceae	NA	Muribaculaceae bacterium DSM 100764	MH0168	Healthy	0.290916
MetaHit	MTG	frc	A0A354HZG4	Bacteroidetes	Bacteroidia	Bacteroidales	Porphyromonadaceae	NA	Porphyromonadaceae bacterium	MH0168	Healthy	0.294091
MetaHit	MTG	frc	A0A355Z7A2	Bacteroidetes	Bacteroidia	Bacteroidales	Porphyromonadaceae	NA	Porphyromonadaceae bacterium	MH0168	Healthy	0.137515
MetaHit	MTG	frc	A0A377BTA6	Proteobacteria	Gammaproteobacteria	Enterobacterales	Enterobacteriaceae	Escherichia	Escherichia coli	MH0168	Healthy	0.0394674
MetaHit	MTG	frc	A1ADQ1	Proteobacteria	Gammaproteobacteria	Enterobacterales	Enterobacteriaceae	Escherichia	Escherichia coli APEC O1	MH0168	Healthy	0.0937885
MetaHit	MTG	frc	C3X762	Proteobacteria	Betaproteobacteria	Burkholderiales	Oxalobacteraceae	Oxalobacter	Oxalobacter formigenes HOxBLS	MH0168	Healthy	0.304033
MetaHit	MTG	frc	O06644	Proteobacteria	Betaproteobacteria	Burkholderiales	Oxalobacteraceae	Oxalobacter	Oxalobacter formigenes	MH0168	Healthy	0.148416
MetaHit	MTG	frc	R5AR18	Bacteroidetes	Bacteroidia	Bacteroidales	Prevotellaceae	Prevotella	Prevotella sp. CAG:1031	MH0168	Healthy	0.137519
MetaHit	MTG	frc	R5AXI8	Bacteroidetes	Bacteroidia	Bacteroidales	Bacteroidaceae	Bacteroides	Bacteroides sp. CAG:927	MH0168	Healthy	0.0666169
MetaHit	MTG	frc	A0A377BTA6	Proteobacteria	Gammaproteobacteria	Enterobacterales	Enterobacteriaceae	Escherichia	Escherichia coli	MH0169	Healthy	0.0213847
MetaHit	MTG	frc	A0A1Q6U8Z5	Proteobacteria	Alphaproteobacteria	Rhodospirillales	Rhodospirillaceae	Azospirillum	Azospirillum sp. 51_20	MH0170	Healthy	0.0502798
MetaHit	MTG	frc	A0A354HZG4	Bacteroidetes	Bacteroidia	Bacteroidales	Porphyromonadaceae	NA	Porphyromonadaceae bacterium	MH0170	Healthy	0.0738237
MetaHit	MTG	frc	A0A377BTA6	Proteobacteria	Gammaproteobacteria	Enterobacterales	Enterobacteriaceae	Escherichia	Escherichia coli	MH0170	Healthy	0.0120284
MetaHit	MTG	frc	R5AR18	Bacteroidetes	Bacteroidia	Bacteroidales	Prevotellaceae	Prevotella	Prevotella sp. CAG:1031	MH0170	Healthy	0.0729771
MetaHit	MTG	frc	C3X762	Proteobacteria	Betaproteobacteria	Burkholderiales	Oxalobacteraceae	Oxalobacter	Oxalobacter formigenes HOxBLS	MH0173	Healthy	0.0227703
MetaHit	MTG	frc	O06644	Proteobacteria	Betaproteobacteria	Burkholderiales	Oxalobacteraceae	Oxalobacter	Oxalobacter formigenes	MH0173	Healthy	0.0112787
MetaHit	MTG	frc	A0A1B1SBJ2	Bacteroidetes	Bacteroidia	Bacteroidales	Muribaculaceae	Muribaculum	Muribaculum intestinale	MH0174	Healthy	0.0917702
MetaHit	MTG	frc	A0A1Q6EIZ9	Bacteroidetes	Bacteroidia	Bacteroidales	NA	NA	Bacteroidales bacterium 52_46	MH0174	Healthy	0.0460966
MetaHit	MTG	frc	A0A2V1IPP0	Bacteroidetes	Bacteroidia	Bacteroidales	Muribaculaceae	NA	Muribaculaceae bacterium DSM 103720	MH0174	Healthy	0.0689859
MetaHit	MTG	frc	A0A354HZG4	Bacteroidetes	Bacteroidia	Bacteroidales	Porphyromonadaceae	NA	Porphyromonadaceae bacterium	MH0174	Healthy	0.0464174
MetaHit	MTG	frc	A0A355Z7A2	Bacteroidetes	Bacteroidia	Bacteroidales	Porphyromonadaceae	NA	Porphyromonadaceae bacterium	MH0174	Healthy	0.023155
MetaHit	MTG	frc	A0A377BTA6	Proteobacteria	Gammaproteobacteria	Enterobacterales	Enterobacteriaceae	Escherichia	Escherichia coli	MH0174	Healthy	0.453649
MetaHit	MTG	frc	C3X762	Proteobacteria	Betaproteobacteria	Burkholderiales	Oxalobacteraceae	Oxalobacter	Oxalobacter formigenes HOxBLS	MH0174	Healthy	0.141551
MetaHit	MTG	frc	R5AR18	Bacteroidetes	Bacteroidia	Bacteroidales	Prevotellaceae	Prevotella	Prevotella sp. CAG:1031	MH0174	Healthy	0.0458851
MetaHit	MTG	frc	A1ADQ1	Proteobacteria	Gammaproteobacteria	Enterobacterales	Enterobacteriaceae	Escherichia	Escherichia coli APEC O1	MH0175	Healthy	0.0124627
MetaHit	MTG	frc	A0A1V8Q5N2	Actinobacteria	Actinobacteria	Bifidobacteriales	Bifidobacteriaceae	Bifidobacterium	Bifidobacterium dentium	MH0176	Healthy	0.00919481
MetaHit	MTG	frc	A0A2W5RAA1	Proteobacteria	Alphaproteobacteria	Rhizobiales	Xanthobacteraceae	Starkeya	Starkeya novella	MH0176	Healthy	0.00943279
MetaHit	MTG	frc	C3X2D4	Proteobacteria	Betaproteobacteria	Burkholderiales	Oxalobacteraceae	Oxalobacter	Oxalobacter formigenes HOxBLS	MH0176	Healthy	0.0189997
MetaHit	MTG	frc	C3X762	Proteobacteria	Betaproteobacteria	Burkholderiales	Oxalobacteraceae	Oxalobacter	Oxalobacter formigenes HOxBLS	MH0176	Healthy	0.0945504
MetaHit	MTG	frc	O06644	Proteobacteria	Betaproteobacteria	Burkholderiales	Oxalobacteraceae	Oxalobacter	Oxalobacter formigenes	MH0176	Healthy	0.0468334
MetaHit	MTG	frc	A0A377BTA6	Proteobacteria	Gammaproteobacteria	Enterobacterales	Enterobacteriaceae	Escherichia	Escherichia coli	MH0177	Healthy	0.101503
MetaHit	MTG	frc	A1ADQ1	Proteobacteria	Gammaproteobacteria	Enterobacterales	Enterobacteriaceae	Escherichia	Escherichia coli APEC O1	MH0177	Healthy	0.0928351
MetaHit	MTG	frc	C3X762	Proteobacteria	Betaproteobacteria	Burkholderiales	Oxalobacteraceae	Oxalobacter	Oxalobacter formigenes HOxBLS	MH0177	Healthy	0.118097
MetaHit	MTG	frc	O06644	Proteobacteria	Betaproteobacteria	Burkholderiales	Oxalobacteraceae	Oxalobacter	Oxalobacter formigenes	MH0177	Healthy	0.112304
MetaHit	MTG	frc	A0A072MW66	Actinobacteria	Actinobacteria	Bifidobacteriales	Bifidobacteriaceae	Bifidobacterium	Bifidobacterium pseudocatenulatum IPLA36007	MH0178	Healthy	0.0112423
MetaHit	MTG	frc	A0A174BHB6	Actinobacteria	Actinobacteria	Bifidobacteriales	Bifidobacteriaceae	Bifidobacterium	Bifidobacterium pseudocatenulatum	MH0178	Healthy	0.0103775
MetaHit	MTG	frc	A0A377BTA6	Proteobacteria	Gammaproteobacteria	Enterobacterales	Enterobacteriaceae	Escherichia	Escherichia coli	MH0179	Healthy	0.0108105
MetaHit	MTG	frc	O06644	Proteobacteria	Betaproteobacteria	Burkholderiales	Oxalobacteraceae	Oxalobacter	Oxalobacter formigenes	MH0179	Healthy	0.0222777
MetaHit	MTG	frc	A0A0D7F737	Proteobacteria	Alphaproteobacteria	Rhizobiales	Bradyrhizobiaceae	Rhodopseudomonas	Rhodopseudomonas palustris	MH0181	Healthy	0.00899183
MetaHit	MTG	frc	A0A1Q6U8Z5	Proteobacteria	Alphaproteobacteria	Rhodospirillales	Rhodospirillaceae	Azospirillum	Azospirillum sp. 51_20	MH0181	Healthy	0.269755
MetaHit	MTG	frc	A1ADQ1	Proteobacteria	Gammaproteobacteria	Enterobacterales	Enterobacteriaceae	Escherichia	Escherichia coli APEC O1	MH0181	Healthy	0.00912152
MetaHit	MTG	frc	C3X2D4	Proteobacteria	Betaproteobacteria	Burkholderiales	Oxalobacteraceae	Oxalobacter	Oxalobacter formigenes HOxBLS	MH0181	Healthy	0.00899183
MetaHit	MTG	frc	C3X762	Proteobacteria	Betaproteobacteria	Burkholderiales	Oxalobacteraceae	Oxalobacter	Oxalobacter formigenes HOxBLS	MH0181	Healthy	0.0894941
MetaHit	MTG	frc	O06644	Proteobacteria	Betaproteobacteria	Burkholderiales	Oxalobacteraceae	Oxalobacter	Oxalobacter formigenes	MH0181	Healthy	0.0443289
MetaHit	MTG	frc	A0A1Q6U8Z5	Proteobacteria	Alphaproteobacteria	Rhodospirillales	Rhodospirillaceae	Azospirillum	Azospirillum sp. 51_20	MH0182	Healthy	1.56061
MetaHit	MTG	frc	A0A2X5G0L0	Proteobacteria	Gammaproteobacteria	Enterobacterales	Enterobacteriaceae	Escherichia	Escherichia coli	MH0182	Healthy	0.0336525
MetaHit	MTG	frc	A1ADQ1	Proteobacteria	Gammaproteobacteria	Enterobacterales	Enterobacteriaceae	Escherichia	Escherichia coli APEC O1	MH0182	Healthy	0.0768506
MetaHit	MTG	frc	A0A072MW66	Actinobacteria	Actinobacteria	Bifidobacteriales	Bifidobacteriaceae	Bifidobacterium	Bifidobacterium pseudocatenulatum IPLA36007	MH0183	Healthy	0.0104619
MetaHit	MTG	frc	A0A1Q6U8Z5	Proteobacteria	Alphaproteobacteria	Rhodospirillales	Rhodospirillaceae	Azospirillum	Azospirillum sp. 51_20	MH0183	Healthy	0.0806206
MetaHit	MTG	frc	A1ADQ1	Proteobacteria	Gammaproteobacteria	Enterobacterales	Enterobacteriaceae	Escherichia	Escherichia coli APEC O1	MH0183	Healthy	0.0108643
MetaHit	MTG	frc	C3X762	Proteobacteria	Betaproteobacteria	Burkholderiales	Oxalobacteraceae	Oxalobacter	Oxalobacter formigenes HOxBLS	MH0183	Healthy	0.0946808
MetaHit	MTG	frc	A1ADQ1	Proteobacteria	Gammaproteobacteria	Enterobacterales	Enterobacteriaceae	Escherichia	Escherichia coli APEC O1	MH0184	Healthy	0.0692802
MetaHit	MTG	frc	A0A377BTA6	Proteobacteria	Gammaproteobacteria	Enterobacterales	Enterobacteriaceae	Escherichia	Escherichia coli	MH0185	Healthy	0.0878897
MetaHit	MTG	frc	A1ADQ1	Proteobacteria	Gammaproteobacteria	Enterobacterales	Enterobacteriaceae	Escherichia	Escherichia coli APEC O1	MH0185	Healthy	0.0169403
MetaHit	MTG	frc	A0A377BTA6	Proteobacteria	Gammaproteobacteria	Enterobacterales	Enterobacteriaceae	Escherichia	Escherichia coli	MH0186	Healthy	0.0563673
MetaHit	MTG	frc	A1ADQ1	Proteobacteria	Gammaproteobacteria	Enterobacterales	Enterobacteriaceae	Escherichia	Escherichia coli APEC O1	MH0186	Healthy	0.0149387
MetaHit	MTG	frc	A0A1B1SBJ2	Bacteroidetes	Bacteroidia	Bacteroidales	Muribaculaceae	Muribaculum	Muribaculum intestinale	MH0187	Healthy	0.0434151
MetaHit	MTG	frc	A0A1G4TYH4	Proteobacteria	Alphaproteobacteria	Rhizobiales	Xanthobacteraceae	Ancylobacter	Ancylobacter rudongensis	MH0187	Healthy	0.00890775
MetaHit	MTG	frc	A0A1Q6EIZ9	Bacteroidetes	Bacteroidia	Bacteroidales	NA	NA	Bacteroidales bacterium 52_46	MH0187	Healthy	0.0174461
MetaHit	MTG	frc	A0A1Q6U8Z5	Proteobacteria	Alphaproteobacteria	Rhodospirillales	Rhodospirillaceae	Azospirillum	Azospirillum sp. 51_20	MH0187	Healthy	0.269132
MetaHit	MTG	frc	A0A2K9Q9H1	Proteobacteria	Gammaproteobacteria	Enterobacterales	Pectobacteriaceae	Dickeya	Dickeya zeae	MH0187	Healthy	0.00890775
MetaHit	MTG	frc	A0A2V1IPP0	Bacteroidetes	Bacteroidia	Bacteroidales	Muribaculaceae	NA	Muribaculaceae bacterium DSM 103720	MH0187	Healthy	0.226277
MetaHit	MTG	frc	A0A2V1J0Z5	Bacteroidetes	Bacteroidia	Bacteroidales	Muribaculaceae	NA	Muribaculaceae bacterium DSM 100764	MH0187	Healthy	0.0262902
MetaHit	MTG	frc	A0A354HZG4	Bacteroidetes	Bacteroidia	Bacteroidales	Porphyromonadaceae	NA	Porphyromonadaceae bacterium	MH0187	Healthy	0.00878375
MetaHit	MTG	frc	A0A355Z7A2	Bacteroidetes	Bacteroidia	Bacteroidales	Porphyromonadaceae	NA	Porphyromonadaceae bacterium	MH0187	Healthy	0.157741
MetaHit	MTG	frc	C3X2D4	Proteobacteria	Betaproteobacteria	Burkholderiales	Oxalobacteraceae	Oxalobacter	Oxalobacter formigenes HOxBLS	MH0187	Healthy	0.0448554
MetaHit	MTG	frc	C3X762	Proteobacteria	Betaproteobacteria	Burkholderiales	Oxalobacteraceae	Oxalobacter	Oxalobacter formigenes HOxBLS	MH0187	Healthy	0.133931
MetaHit	MTG	frc	H1RYM1	Proteobacteria	Betaproteobacteria	Burkholderiales	Burkholderiaceae	Cupriavidus	Cupriavidus basilensis OR16	MH0187	Healthy	0.0045069
MetaHit	MTG	frc	O06644	Proteobacteria	Betaproteobacteria	Burkholderiales	Oxalobacteraceae	Oxalobacter	Oxalobacter formigenes	MH0187	Healthy	0.00884532
MetaHit	MTG	frc	R5AR18	Bacteroidetes	Bacteroidia	Bacteroidales	Prevotellaceae	Prevotella	Prevotella sp. CAG:1031	MH0187	Healthy	0.026049
MetaHit	MTG	frc	R5AXI8	Bacteroidetes	Bacteroidia	Bacteroidales	Bacteroidaceae	Bacteroides	Bacteroides sp. CAG:927	MH0187	Healthy	0.0439187
MetaHit	MTG	frc	A0A087QB11	Firmicutes	Bacilli	Lactobacillales	Lactobacillaceae	Lactobacillus	Lactobacillus gasseri SV-16A-US	MH0188	Healthy	0.0114991
MetaHit	MTG	frc	A0A377BTA6	Proteobacteria	Gammaproteobacteria	Enterobacterales	Enterobacteriaceae	Escherichia	Escherichia coli	MH0188	Healthy	0.0115444
MetaHit	MTG	frc	A1ADQ1	Proteobacteria	Gammaproteobacteria	Enterobacterales	Enterobacteriaceae	Escherichia	Escherichia coli APEC O1	MH0188	Healthy	0.0495927
MetaHit	MTG	frc	C3X762	Proteobacteria	Betaproteobacteria	Burkholderiales	Oxalobacteraceae	Oxalobacter	Oxalobacter formigenes HOxBLS	MH0188	Healthy	0.0546606
MetaHit	MTG	frc	O06644	Proteobacteria	Betaproteobacteria	Burkholderiales	Oxalobacteraceae	Oxalobacter	Oxalobacter formigenes	MH0188	Healthy	0.0120195
MetaHit	MTG	frc	A0A192ER68	Proteobacteria	Gammaproteobacteria	Enterobacterales	Enterobacteriaceae	Escherichia	Escherichia coli	MH0189	Healthy	0.0177124
MetaHit	MTG	frc	A0A1F3ZN52	Proteobacteria	Betaproteobacteria	NA	NA	NA	Betaproteobacteria bacterium RIFCSPLOWO2_02_FULL_6	MH0189	Healthy	0.00868912
MetaHit	MTG	frc	A0A1F4IAS5	Proteobacteria	Betaproteobacteria	Burkholderiales	NA	NA	Burkholderiales bacterium RIFCSPHIGHO2_12_FULL_61_	MH0189	Healthy	0.0175437
MetaHit	MTG	frc	A1ADQ1	Proteobacteria	Gammaproteobacteria	Enterobacterales	Enterobacteriaceae	Escherichia	Escherichia coli APEC O1	MH0189	Healthy	0.0974184
MetaHit	MTG	frc	C3X2D4	Proteobacteria	Betaproteobacteria	Burkholderiales	Oxalobacteraceae	Oxalobacter	Oxalobacter formigenes HOxBLS	MH0189	Healthy	0.0087303
MetaHit	MTG	frc	C3X762	Proteobacteria	Betaproteobacteria	Burkholderiales	Oxalobacteraceae	Oxalobacter	Oxalobacter formigenes HOxBLS	MH0189	Healthy	0.225917
MetaHit	MTG	frc	O06644	Proteobacteria	Betaproteobacteria	Burkholderiales	Oxalobacteraceae	Oxalobacter	Oxalobacter formigenes	MH0189	Healthy	0.094687
MetaHit	MTG	frc	A0A1Q6U8Z5	Proteobacteria	Alphaproteobacteria	Rhodospirillales	Rhodospirillaceae	Azospirillum	Azospirillum sp. 51_20	MH0191	Healthy	0.797238
MetaHit	MTG	frc	A0A377BTA6	Proteobacteria	Gammaproteobacteria	Enterobacterales	Enterobacteriaceae	Escherichia	Escherichia coli	MH0191	Healthy	0.071521
MetaHit	MTG	frc	A1ADQ1	Proteobacteria	Gammaproteobacteria	Enterobacterales	Enterobacteriaceae	Escherichia	Escherichia coli APEC O1	MH0191	Healthy	0.00842434
MetaHit	MTG	frc	A0A2V1J0Z5	Bacteroidetes	Bacteroidia	Bacteroidales	Muribaculaceae	NA	Muribaculaceae bacterium DSM 100764	MH0193	Healthy	0.0131792
MetaHit	MTG	frc	A0A377BTA6	Proteobacteria	Gammaproteobacteria	Enterobacterales	Enterobacteriaceae	Escherichia	Escherichia coli	MH0193	Healthy	0.0447792
MetaHit	MTG	frc	A1ADQ1	Proteobacteria	Gammaproteobacteria	Enterobacterales	Enterobacteriaceae	Escherichia	Escherichia coli APEC O1	MH0193	Healthy	0.0678916
MetaHit	MTG	frc	A0A377BTA6	Proteobacteria	Gammaproteobacteria	Enterobacterales	Enterobacteriaceae	Escherichia	Escherichia coli	MH0195	Healthy	0.00651056
MetaHit	MTG	frc	A0A140NMR5	Proteobacteria	Gammaproteobacteria	Enterobacterales	Morganellaceae	Providencia	Providencia stuartii MRSN 2154	MH0196	Healthy	0.00679355
MetaHit	MTG	frc	A0A377BTA6	Proteobacteria	Gammaproteobacteria	Enterobacterales	Enterobacteriaceae	Escherichia	Escherichia coli	MH0196	Healthy	0.461407
MetaHit	MTG	frc	A1ADQ1	Proteobacteria	Gammaproteobacteria	Enterobacterales	Enterobacteriaceae	Escherichia	Escherichia coli APEC O1	MH0196	Healthy	0.230981
MetaHit	MTG	frc	A0A1Q6U8Z5	Proteobacteria	Alphaproteobacteria	Rhodospirillales	Rhodospirillaceae	Azospirillum	Azospirillum sp. 51_20	MH0197	Healthy	0.0645952
MetaHit	MTG	frc	C3X762	Proteobacteria	Betaproteobacteria	Burkholderiales	Oxalobacteraceae	Oxalobacter	Oxalobacter formigenes HOxBLS	MH0197	Healthy	0.264306
MetaHit	MTG	frc	H1RYM1	Proteobacteria	Betaproteobacteria	Burkholderiales	Burkholderiaceae	Cupriavidus	Cupriavidus basilensis OR16	MH0197	Healthy	0.00360571
MetaHit	MTG	frc	O06644	Proteobacteria	Betaproteobacteria	Burkholderiales	Oxalobacteraceae	Oxalobacter	Oxalobacter formigenes	MH0197	Healthy	0.0495364
MetaHit	MTG	frc	A0A072MW66	Actinobacteria	Actinobacteria	Bifidobacteriales	Bifidobacteriaceae	Bifidobacterium	Bifidobacterium pseudocatenulatum IPLA36007	MH0198	Healthy	0.0495135
MetaHit	MTG	frc	A0A0L7BLA3	Actinobacteria	Actinobacteria	Bifidobacteriales	Bifidobacteriaceae	Bifidobacterium	Bifidobacterium animalis subsp. animalis MCC 0483	MH0198	Healthy	0.00603551
MetaHit	MTG	frc	A0A1B1SBJ2	Bacteroidetes	Bacteroidia	Bacteroidales	Muribaculaceae	Muribaculum	Muribaculum intestinale	MH0198	Healthy	0.159443
MetaHit	MTG	frc	A0A1Q6EIZ9	Bacteroidetes	Bacteroidia	Bacteroidales	NA	NA	Bacteroidales bacterium 52_46	MH0198	Healthy	0.0431247
MetaHit	MTG	frc	A0A1Q6EPI6	Actinobacteria	Actinobacteria	Bifidobacteriales	Bifidobacteriaceae	Bifidobacterium	Bifidobacterium sp. 56_9_plus	MH0198	Healthy	0.00592845
MetaHit	MTG	frc	A0A1Q6U8Z5	Proteobacteria	Alphaproteobacteria	Rhodospirillales	Rhodospirillaceae	Azospirillum	Azospirillum sp. 51_20	MH0198	Healthy	0.348472
MetaHit	MTG	frc	A0A2V1IPP0	Bacteroidetes	Bacteroidia	Bacteroidales	Muribaculaceae	NA	Muribaculaceae bacterium DSM 103720	MH0198	Healthy	0.104491
MetaHit	MTG	frc	A0A2V1J0Z5	Bacteroidetes	Bacteroidia	Bacteroidales	Muribaculaceae	NA	Muribaculaceae bacterium DSM 100764	MH0198	Healthy	0.408487
MetaHit	MTG	frc	A0A354HZG4	Bacteroidetes	Bacteroidia	Bacteroidales	Porphyromonadaceae	NA	Porphyromonadaceae bacterium	MH0198	Healthy	0.595541
MetaHit	MTG	frc	A0A355Z7A2	Bacteroidetes	Bacteroidia	Bacteroidales	Porphyromonadaceae	NA	Porphyromonadaceae bacterium	MH0198	Healthy	0.198054
MetaHit	MTG	frc	A1ADQ1	Proteobacteria	Gammaproteobacteria	Enterobacterales	Enterobacteriaceae	Escherichia	Escherichia coli APEC O1	MH0198	Healthy	0.00642724
MetaHit	MTG	frc	C3X762	Proteobacteria	Betaproteobacteria	Burkholderiales	Oxalobacteraceae	Oxalobacter	Oxalobacter formigenes HOxBLS	MH0198	Healthy	0.0693656
MetaHit	MTG	frc	O06644	Proteobacteria	Betaproteobacteria	Burkholderiales	Oxalobacteraceae	Oxalobacter	Oxalobacter formigenes	MH0198	Healthy	0.0374822
MetaHit	MTG	frc	R5AXI8	Bacteroidetes	Bacteroidia	Bacteroidales	Bacteroidaceae	Bacteroides	Bacteroides sp. CAG:927	MH0198	Healthy	4.35489
MetaHit	MTG	frc	A0A1B1WGN2	Actinobacteria	Actinobacteria	Corynebacteriales	Mycobacteriaceae	Mycobacterium	Mycobacterium sp. djl-10	MH0199	Healthy	0.00557085
MetaHit	MTG	frc	A0A377BTA6	Proteobacteria	Gammaproteobacteria	Enterobacterales	Enterobacteriaceae	Escherichia	Escherichia coli	MH0199	Healthy	0.647279
MetaHit	MTG	frc	A1ADQ1	Proteobacteria	Gammaproteobacteria	Enterobacterales	Enterobacteriaceae	Escherichia	Escherichia coli APEC O1	MH0199	Healthy	0.188699
MetaHit	MTG	frc	A0A062XDE4	Firmicutes	Bacilli	Lactobacillales	Lactobacillaceae	Lactobacillus	Lactobacillus animalis	MH0203	Healthy	0.0120383
MetaHit	MTG	frc	A0A087QB11	Firmicutes	Bacilli	Lactobacillales	Lactobacillaceae	Lactobacillus	Lactobacillus gasseri SV-16A-US	MH0203	Healthy	0.00601916
MetaHit	MTG	frc	A0A0D7F737	Proteobacteria	Alphaproteobacteria	Rhizobiales	Bradyrhizobiaceae	Rhodopseudomonas	Rhodopseudomonas palustris	MH0203	Healthy	0.00644706
MetaHit	MTG	frc	A0A1V3Y246	Firmicutes	Bacilli	Lactobacillales	Lactobacillaceae	Lactobacillus	Lactobacillus gasseri	MH0203	Healthy	0.00601916
MetaHit	MTG	frc	A0A377BTA6	Proteobacteria	Gammaproteobacteria	Enterobacterales	Enterobacteriaceae	Escherichia	Escherichia coli	MH0203	Healthy	0.0061693
MetaHit	MTG	frc	C3X762	Proteobacteria	Betaproteobacteria	Burkholderiales	Oxalobacteraceae	Oxalobacter	Oxalobacter formigenes HOxBLS	MH0203	Healthy	0.160416
MetaHit	MTG	frc	H1RYM1	Proteobacteria	Betaproteobacteria	Burkholderiales	Burkholderiaceae	Cupriavidus	Cupriavidus basilensis OR16	MH0203	Healthy	0.00323888
MetaHit	MTG	frc	O06644	Proteobacteria	Betaproteobacteria	Burkholderiales	Oxalobacteraceae	Oxalobacter	Oxalobacter formigenes	MH0203	Healthy	0.0572102
MetaHit	MTG	frc	A0A085GUA8	Proteobacteria	Gammaproteobacteria	Enterobacterales	Hafniaceae	Hafnia	Hafnia alvei ATCC 13337	MH0204	Healthy	0.0184786
MetaHit	MTG	frc	A0A087ADU5	Actinobacteria	Actinobacteria	Bifidobacteriales	Bifidobacteriaceae	Bifidobacterium	Bifidobacterium choerinum	MH0204	Healthy	0.0115422
MetaHit	MTG	frc	A0A2N3QI38	Actinobacteria	Actinobacteria	Bifidobacteriales	Bifidobacteriaceae	Bifidobacterium	Bifidobacterium pseudolongum subsp. globosum	MH0204	Healthy	0.00578412
MetaHit	MTG	frc	A0A377BTA6	Proteobacteria	Gammaproteobacteria	Enterobacterales	Enterobacteriaceae	Escherichia	Escherichia coli	MH0204	Healthy	4.66572
MetaHit	MTG	frc	C3X762	Proteobacteria	Betaproteobacteria	Burkholderiales	Oxalobacteraceae	Oxalobacter	Oxalobacter formigenes HOxBLS	MH0204	Healthy	0.00604332
MetaHit	MTG	frc	A0A087ADU5	Actinobacteria	Actinobacteria	Bifidobacteriales	Bifidobacteriaceae	Bifidobacterium	Bifidobacterium choerinum	MH0205	Healthy	0.00649095
MetaHit	MTG	frc	A0A1F4IAS5	Proteobacteria	Betaproteobacteria	Burkholderiales	NA	NA	Burkholderiales bacterium RIFCSPHIGHO2_12_FULL_61_	MH0205	Healthy	0.00686186
MetaHit	MTG	frc	A0A1Q6U8Z5	Proteobacteria	Alphaproteobacteria	Rhodospirillales	Rhodospirillaceae	Azospirillum	Azospirillum sp. 51_20	MH0205	Healthy	0.0273174
MetaHit	MTG	frc	A0A1V8Q5N2	Actinobacteria	Actinobacteria	Bifidobacteriales	Bifidobacteriaceae	Bifidobacterium	Bifidobacterium dentium	MH0205	Healthy	0.00661005
MetaHit	MTG	frc	A1ADQ1	Proteobacteria	Gammaproteobacteria	Enterobacterales	Enterobacteriaceae	Escherichia	Escherichia coli APEC O1	MH0205	Healthy	0.00692784
MetaHit	MTG	frc	C3X762	Proteobacteria	Betaproteobacteria	Burkholderiales	Oxalobacteraceae	Oxalobacter	Oxalobacter formigenes HOxBLS	MH0205	Healthy	0.14274
MetaHit	MTG	frc	O06644	Proteobacteria	Betaproteobacteria	Burkholderiales	Oxalobacteraceae	Oxalobacter	Oxalobacter formigenes	MH0205	Healthy	0.0471352
MetaHit	MTG	frc	A0A072MW66	Actinobacteria	Actinobacteria	Bifidobacteriales	Bifidobacteriaceae	Bifidobacterium	Bifidobacterium pseudocatenulatum IPLA36007	MH0206	Healthy	0.540731
MetaHit	MTG	frc	A0A174BHB6	Actinobacteria	Actinobacteria	Bifidobacteriales	Bifidobacteriaceae	Bifidobacterium	Bifidobacterium pseudocatenulatum	MH0206	Healthy	0.011344
MetaHit	MTG	frc	A0A1Q6EPI6	Actinobacteria	Actinobacteria	Bifidobacteriales	Bifidobacteriaceae	Bifidobacterium	Bifidobacterium sp. 56_9_plus	MH0206	Healthy	0.0353148
MetaHit	MTG	frc	A0A1Q6U8Z5	Proteobacteria	Alphaproteobacteria	Rhodospirillales	Rhodospirillaceae	Azospirillum	Azospirillum sp. 51_20	MH0206	Healthy	2.60418
MetaHit	MTG	frc	A0A377BTA6	Proteobacteria	Gammaproteobacteria	Enterobacterales	Enterobacteriaceae	Escherichia	Escherichia coli	MH0206	Healthy	1.16774
MetaHit	MTG	frc	A1ADQ1	Proteobacteria	Gammaproteobacteria	Enterobacterales	Enterobacteriaceae	Escherichia	Escherichia coli APEC O1	MH0206	Healthy	0.408384
MetaHit	MTG	frc	C3X762	Proteobacteria	Betaproteobacteria	Burkholderiales	Oxalobacteraceae	Oxalobacter	Oxalobacter formigenes HOxBLS	MH0206	Healthy	0.10017
MetaHit	MTG	frc	O06644	Proteobacteria	Betaproteobacteria	Burkholderiales	Oxalobacteraceae	Oxalobacter	Oxalobacter formigenes	MH0206	Healthy	0.0124042
MetaHit	MTG	frc	C3X762	Proteobacteria	Betaproteobacteria	Burkholderiales	Oxalobacteraceae	Oxalobacter	Oxalobacter formigenes HOxBLS	MH0212	Healthy	0.0358109
MetaHit	MTG	frc	O06644	Proteobacteria	Betaproteobacteria	Burkholderiales	Oxalobacteraceae	Oxalobacter	Oxalobacter formigenes	MH0212	Healthy	0.0295635
MetaHit	MTG	frc	A0A072MW66	Actinobacteria	Actinobacteria	Bifidobacteriales	Bifidobacteriaceae	Bifidobacterium	Bifidobacterium pseudocatenulatum IPLA36007	MH0217	Healthy	0.168092
MetaHit	MTG	frc	A0A174BHB6	Actinobacteria	Actinobacteria	Bifidobacteriales	Bifidobacteriaceae	Bifidobacterium	Bifidobacterium pseudocatenulatum	MH0217	Healthy	0.0147773
MetaHit	MTG	frc	A0A1Q6EPI6	Actinobacteria	Actinobacteria	Bifidobacteriales	Bifidobacteriaceae	Bifidobacterium	Bifidobacterium sp. 56_9_plus	MH0217	Healthy	0.0153344
MetaHit	MTG	frc	C3X762	Proteobacteria	Betaproteobacteria	Burkholderiales	Oxalobacteraceae	Oxalobacter	Oxalobacter formigenes HOxBLS	MH0217	Healthy	0.0978651
MetaHit	MTG	frc	H1RYM1	Proteobacteria	Betaproteobacteria	Burkholderiales	Burkholderiaceae	Cupriavidus	Cupriavidus basilensis OR16	MH0217	Healthy	0.00823309
MetaHit	MTG	frc	O06644	Proteobacteria	Betaproteobacteria	Burkholderiales	Oxalobacteraceae	Oxalobacter	Oxalobacter formigenes	MH0217	Healthy	0.0888712
MetaHit	MTG	frc	A0A377BTA6	Proteobacteria	Gammaproteobacteria	Enterobacterales	Enterobacteriaceae	Escherichia	Escherichia coli	MH0220	Healthy	0.0333407
MetaHit	MTG	frc	A1ADQ1	Proteobacteria	Gammaproteobacteria	Enterobacterales	Enterobacteriaceae	Escherichia	Escherichia coli APEC O1	MH0220	Healthy	0.155515
MetaHit	MTG	frc	A0A072MW66	Actinobacteria	Actinobacteria	Bifidobacteriales	Bifidobacteriaceae	Bifidobacterium	Bifidobacterium pseudocatenulatum IPLA36007	MH0224	Healthy	0.019885
MetaHit	MTG	frc	A0A087ADU5	Actinobacteria	Actinobacteria	Bifidobacteriales	Bifidobacteriaceae	Bifidobacterium	Bifidobacterium choerinum	MH0224	Healthy	0.00644918
MetaHit	MTG	frc	A0A0L8QWJ2	Actinobacteria	Actinobacteria	Streptomycetales	Streptomycetaceae	Streptomyces	Streptomyces varsoviensis	MH0224	Healthy	0.00685032
MetaHit	MTG	frc	A0A377BTA6	Proteobacteria	Gammaproteobacteria	Enterobacterales	Enterobacteriaceae	Escherichia	Escherichia coli	MH0224	Healthy	0.0194792
MetaHit	MTG	frc	A1ADQ1	Proteobacteria	Gammaproteobacteria	Enterobacterales	Enterobacteriaceae	Escherichia	Escherichia coli APEC O1	MH0224	Healthy	0.0688326
MetaHit	MTG	frc	C3X762	Proteobacteria	Betaproteobacteria	Burkholderiales	Oxalobacteraceae	Oxalobacter	Oxalobacter formigenes HOxBLS	MH0224	Healthy	0.0742872
MetaHit	MTG	frc	H1RYM1	Proteobacteria	Betaproteobacteria	Burkholderiales	Burkholderiaceae	Cupriavidus	Cupriavidus basilensis OR16	MH0224	Healthy	0.0102266
MetaHit	MTG	frc	O06644	Proteobacteria	Betaproteobacteria	Burkholderiales	Oxalobacteraceae	Oxalobacter	Oxalobacter formigenes	MH0224	Healthy	0.0267611
MetaHit	MTG	frc	Q8FFE8	Proteobacteria	Gammaproteobacteria	Enterobacterales	Enterobacteriaceae	Escherichia	Escherichia coli CFT073	MH0224	Healthy	0.00688326
MetaHit	MTG	frc	A0A072MW66	Actinobacteria	Actinobacteria	Bifidobacteriales	Bifidobacteriaceae	Bifidobacterium	Bifidobacterium pseudocatenulatum IPLA36007	MH0227	Healthy	0.0620916
MetaHit	MTG	frc	A0A1Q6EPI6	Actinobacteria	Actinobacteria	Bifidobacteriales	Bifidobacteriaceae	Bifidobacterium	Bifidobacterium sp. 56_9_plus	MH0227	Healthy	0.00841227
MetaHit	MTG	frc	A0A1Q6U8Z5	Proteobacteria	Alphaproteobacteria	Rhodospirillales	Rhodospirillaceae	Azospirillum	Azospirillum sp. 51_20	MH0227	Healthy	0.232301
MetaHit	MTG	frc	A0A1V8Q5N2	Actinobacteria	Actinobacteria	Bifidobacteriales	Bifidobacteriaceae	Bifidobacterium	Bifidobacterium dentium	MH0227	Healthy	0.00890507
MetaHit	MTG	frc	A0A377BTA6	Proteobacteria	Gammaproteobacteria	Enterobacterales	Enterobacteriaceae	Escherichia	Escherichia coli	MH0227	Healthy	0.0130051
MetaHit	MTG	frc	A1ADQ1	Proteobacteria	Gammaproteobacteria	Enterobacterales	Enterobacteriaceae	Escherichia	Escherichia coli APEC O1	MH0227	Healthy	0.0369065
MetaHit	MTG	frc	A0A1Q6U8Z5	Proteobacteria	Alphaproteobacteria	Rhodospirillales	Rhodospirillaceae	Azospirillum	Azospirillum sp. 51_20	MH0229	Healthy	0.181591
MetaHit	MTG	frc	A0A2X1KJL9	Proteobacteria	Gammaproteobacteria	Enterobacterales	Enterobacteriaceae	Escherichia	Escherichia coli	MH0229	Healthy	0.00774917
MetaHit	MTG	frc	A0A377BTA6	Proteobacteria	Gammaproteobacteria	Enterobacterales	Enterobacteriaceae	Escherichia	Escherichia coli	MH0229	Healthy	0.0504487
MetaHit	MTG	frc	A1ADQ1	Proteobacteria	Gammaproteobacteria	Enterobacterales	Enterobacteriaceae	Escherichia	Escherichia coli APEC O1	MH0229	Healthy	0.142614
MetaHit	MTG	frc	C3X762	Proteobacteria	Betaproteobacteria	Burkholderiales	Oxalobacteraceae	Oxalobacter	Oxalobacter formigenes HOxBLS	MH0229	Healthy	0.0816221
MetaHit	MTG	frc	O06644	Proteobacteria	Betaproteobacteria	Burkholderiales	Oxalobacteraceae	Oxalobacter	Oxalobacter formigenes	MH0229	Healthy	0.017327
MetaHit	MTG	frc	A0A072MW66	Actinobacteria	Actinobacteria	Bifidobacteriales	Bifidobacteriaceae	Bifidobacterium	Bifidobacterium pseudocatenulatum IPLA36007	MH0230	Healthy	1.13906
MetaHit	MTG	frc	A0A174BHB6	Actinobacteria	Actinobacteria	Bifidobacteriales	Bifidobacteriaceae	Bifidobacterium	Bifidobacterium pseudocatenulatum	MH0230	Healthy	0.0949691
MetaHit	MTG	frc	A0A1Q6EPI6	Actinobacteria	Actinobacteria	Bifidobacteriales	Bifidobacteriaceae	Bifidobacterium	Bifidobacterium sp. 56_9_plus	MH0230	Healthy	0.0492744
MetaHit	MTG	frc	A0A377BTA6	Proteobacteria	Gammaproteobacteria	Enterobacterales	Enterobacteriaceae	Escherichia	Escherichia coli	MH0230	Healthy	0.00719882
MetaHit	MTG	frc	A1ADQ1	Proteobacteria	Gammaproteobacteria	Enterobacterales	Enterobacteriaceae	Escherichia	Escherichia coli APEC O1	MH0230	Healthy	0.00763144
MetaHit	MTG	frc	A0A377BTA6	Proteobacteria	Gammaproteobacteria	Enterobacterales	Enterobacteriaceae	Escherichia	Escherichia coli	MH0233	Healthy	0.0246062
MetaHit	MTG	frc	A1ADQ1	Proteobacteria	Gammaproteobacteria	Enterobacterales	Enterobacteriaceae	Escherichia	Escherichia coli APEC O1	MH0233	Healthy	0.0173899
MetaHit	MTG	frc	A0A377BTA6	Proteobacteria	Gammaproteobacteria	Enterobacterales	Enterobacteriaceae	Escherichia	Escherichia coli	MH0236	Healthy	0.0125822
MetaHit	MTG	frc	A1ADQ1	Proteobacteria	Gammaproteobacteria	Enterobacterales	Enterobacteriaceae	Escherichia	Escherichia coli APEC O1	MH0236	Healthy	0.040015
MetaHit	MTG	frc	A1ADQ1	Proteobacteria	Gammaproteobacteria	Enterobacterales	Enterobacteriaceae	Escherichia	Escherichia coli APEC O1	MH0239	Healthy	0.0355657
MetaHit	MTG	frc	A0A1V8Q5N2	Actinobacteria	Actinobacteria	Bifidobacteriales	Bifidobacteriaceae	Bifidobacterium	Bifidobacterium dentium	MH0243	Healthy	0.00681068
MetaHit	MTG	frc	A0A377BTA6	Proteobacteria	Gammaproteobacteria	Enterobacterales	Enterobacteriaceae	Escherichia	Escherichia coli	MH0243	Healthy	0.0202004
MetaHit	MTG	frc	A1ADQ1	Proteobacteria	Gammaproteobacteria	Enterobacterales	Enterobacteriaceae	Escherichia	Escherichia coli APEC O1	MH0243	Healthy	0.0285525
MetaHit	MTG	frc	C3X762	Proteobacteria	Betaproteobacteria	Burkholderiales	Oxalobacteraceae	Oxalobacter	Oxalobacter formigenes HOxBLS	MH0243	Healthy	0.0210103
MetaHit	MTG	frc	A0A1Q6U8Z5	Proteobacteria	Alphaproteobacteria	Rhodospirillales	Rhodospirillaceae	Azospirillum	Azospirillum sp. 51_20	MH0244	Healthy	0.269736
MetaHit	MTG	frc	C3X762	Proteobacteria	Betaproteobacteria	Burkholderiales	Oxalobacteraceae	Oxalobacter	Oxalobacter formigenes HOxBLS	MH0244	Healthy	0.0196437
MetaHit	MTG	frc	A0A072MW66	Actinobacteria	Actinobacteria	Bifidobacteriales	Bifidobacteriaceae	Bifidobacterium	Bifidobacterium pseudocatenulatum IPLA36007	MH0247	Healthy	0.00511239
MetaHit	MTG	frc	A0A087ADU5	Actinobacteria	Actinobacteria	Bifidobacteriales	Bifidobacteriaceae	Bifidobacterium	Bifidobacterium choerinum	MH0247	Healthy	0.00497422
MetaHit	MTG	frc	A0A1V8Q5N2	Actinobacteria	Actinobacteria	Bifidobacteriales	Bifidobacteriaceae	Bifidobacterium	Bifidobacterium dentium	MH0247	Healthy	0.00506549
MetaHit	MTG	frc	A0A377BTA6	Proteobacteria	Gammaproteobacteria	Enterobacterales	Enterobacteriaceae	Escherichia	Escherichia coli	MH0247	Healthy	0.380612
MetaHit	MTG	frc	A1ADQ1	Proteobacteria	Gammaproteobacteria	Enterobacterales	Enterobacteriaceae	Escherichia	Escherichia coli APEC O1	MH0247	Healthy	0.0530902
MetaHit	MTG	frc	R9KTQ7	Actinobacteria	Coriobacteriia	Eggerthellales	Eggerthellaceae	Enterorhabdus	Enterorhabdus caecimuris B7	MH0247	Healthy	0.00485396
MetaHit	MTG	frc	A0A1F4IAS5	Proteobacteria	Betaproteobacteria	Burkholderiales	NA	NA	Burkholderiales bacterium RIFCSPHIGHO2_12_FULL_61_	MH0250	Healthy	0.00533613
MetaHit	MTG	frc	A0A1Q6U8Z5	Proteobacteria	Alphaproteobacteria	Rhodospirillales	Rhodospirillaceae	Azospirillum	Azospirillum sp. 51_20	MH0250	Healthy	0.281475
MetaHit	MTG	frc	A0A2W5RAA1	Proteobacteria	Alphaproteobacteria	Rhizobiales	Xanthobacteraceae	Starkeya	Starkeya novella	MH0250	Healthy	0.00527336
MetaHit	MTG	frc	A0A377BTA6	Proteobacteria	Gammaproteobacteria	Enterobacterales	Enterobacteriaceae	Escherichia	Escherichia coli	MH0250	Healthy	0.0508203
MetaHit	MTG	frc	A1ADQ1	Proteobacteria	Gammaproteobacteria	Enterobacterales	Enterobacteriaceae	Escherichia	Escherichia coli APEC O1	MH0250	Healthy	0.0538744
MetaHit	MTG	frc	C3X762	Proteobacteria	Betaproteobacteria	Burkholderiales	Oxalobacteraceae	Oxalobacter	Oxalobacter formigenes HOxBLS	MH0250	Healthy	0.169145
MetaHit	MTG	frc	H1RYM1	Proteobacteria	Betaproteobacteria	Burkholderiales	Burkholderiaceae	Cupriavidus	Cupriavidus basilensis OR16	MH0250	Healthy	0.00266807
MetaHit	MTG	frc	O06644	Proteobacteria	Betaproteobacteria	Burkholderiales	Oxalobacteraceae	Oxalobacter	Oxalobacter formigenes	MH0250	Healthy	0.0471275
MetaHit	MTG	frc	A0A1Q6EIZ9	Bacteroidetes	Bacteroidia	Bacteroidales	NA	NA	Bacteroidales bacterium 52_46	MH0251	Healthy	0.0294418
MetaHit	MTG	frc	A0A087ADU5	Actinobacteria	Actinobacteria	Bifidobacteriales	Bifidobacteriaceae	Bifidobacterium	Bifidobacterium choerinum	MH0253	Healthy	0.00769605
MetaHit	MTG	frc	A0A087B567	Actinobacteria	Actinobacteria	Bifidobacteriales	Bifidobacteriaceae	Bifidobacterium	Bifidobacterium cuniculi	MH0253	Healthy	0.00771343
MetaHit	MTG	frc	A0A1B1SBJ2	Bacteroidetes	Bacteroidia	Bacteroidales	Muribaculaceae	Muribaculum	Muribaculum intestinale	MH0253	Healthy	0.0235118
MetaHit	MTG	frc	A0A1Q6EIZ9	Bacteroidetes	Bacteroidia	Bacteroidales	NA	NA	Bacteroidales bacterium 52_46	MH0253	Healthy	0.0157468
MetaHit	MTG	frc	A0A2N3QI38	Actinobacteria	Actinobacteria	Bifidobacteriales	Bifidobacteriaceae	Bifidobacterium	Bifidobacterium pseudolongum subsp. globosum	MH0253	Healthy	0.00771343
MetaHit	MTG	frc	A0A2V1IPP0	Bacteroidetes	Bacteroidia	Bacteroidales	Muribaculaceae	NA	Muribaculaceae bacterium DSM 103720	MH0253	Healthy	0.00785528
MetaHit	MTG	frc	A0A2V1J0Z5	Bacteroidetes	Bacteroidia	Bacteroidales	Muribaculaceae	NA	Muribaculaceae bacterium DSM 100764	MH0253	Healthy	0.0711885
MetaHit	MTG	frc	A0A354HZG4	Bacteroidetes	Bacteroidia	Bacteroidales	Porphyromonadaceae	NA	Porphyromonadaceae bacterium	MH0253	Healthy	0.0396409
MetaHit	MTG	frc	A0A355Z7A2	Bacteroidetes	Bacteroidia	Bacteroidales	Porphyromonadaceae	NA	Porphyromonadaceae bacterium	MH0253	Healthy	0.0316393
MetaHit	MTG	frc	A0A377BTA6	Proteobacteria	Gammaproteobacteria	Enterobacterales	Enterobacteriaceae	Escherichia	Escherichia coli	MH0253	Healthy	0.0464904
MetaHit	MTG	frc	A1ADQ1	Proteobacteria	Gammaproteobacteria	Enterobacterales	Enterobacteriaceae	Escherichia	Escherichia coli APEC O1	MH0253	Healthy	0.0410703
MetaHit	MTG	frc	C3X762	Proteobacteria	Betaproteobacteria	Burkholderiales	Oxalobacteraceae	Oxalobacter	Oxalobacter formigenes HOxBLS	MH0253	Healthy	0.0483544
MetaHit	MTG	frc	H1RYM1	Proteobacteria	Betaproteobacteria	Burkholderiales	Burkholderiaceae	Cupriavidus	Cupriavidus basilensis OR16	MH0253	Healthy	0.00406791
MetaHit	MTG	frc	O06644	Proteobacteria	Betaproteobacteria	Burkholderiales	Oxalobacteraceae	Oxalobacter	Oxalobacter formigenes	MH0253	Healthy	0.0159675
MetaHit	MTG	frc	R5AXI8	Bacteroidetes	Bacteroidia	Bacteroidales	Bacteroidaceae	Bacteroides	Bacteroides sp. CAG:927	MH0253	Healthy	0.0554973
MetaHit	MTG	frc	A0A0K4YN22	Proteobacteria	Gammaproteobacteria	Enterobacterales	Enterobacteriaceae	Escherichia	Escherichia coli	MH0257	Healthy	0.0068928
MetaHit	MTG	frc	A0A1B1SBJ2	Bacteroidetes	Bacteroidia	Bacteroidales	Muribaculaceae	Muribaculum	Muribaculum intestinale	MH0257	Healthy	0.0526129
MetaHit	MTG	frc	A0A1E3STM3	Actinobacteria	Actinobacteria	Corynebacteriales	Mycobacteriaceae	Mycobacterium	Mycobacterium sherrisii	MH0257	Healthy	0.00685982
MetaHit	MTG	frc	A0A1F4IAS5	Proteobacteria	Betaproteobacteria	Burkholderiales	NA	NA	Burkholderiales bacterium RIFCSPHIGHO2_12_FULL_61_	MH0257	Healthy	0.00682715
MetaHit	MTG	frc	A0A1J0EDS7	Proteobacteria	Gammaproteobacteria	Enterobacterales	Morganellaceae	Providencia	Providencia rettgeri	MH0257	Healthy	0.00685982
MetaHit	MTG	frc	A0A1Q6EIZ9	Bacteroidetes	Bacteroidia	Bacteroidales	NA	NA	Bacteroidales bacterium 52_46	MH0257	Healthy	0.138745
MetaHit	MTG	frc	A0A2K9Q9H1	Proteobacteria	Gammaproteobacteria	Enterobacterales	Pectobacteriaceae	Dickeya	Dickeya zeae	MH0257	Healthy	0.00674683
MetaHit	MTG	frc	A0A2V1IPP0	Bacteroidetes	Bacteroidia	Bacteroidales	Muribaculaceae	NA	Muribaculaceae bacterium DSM 103720	MH0257	Healthy	0.237302
MetaHit	MTG	frc	A0A2V1J0Z5	Bacteroidetes	Bacteroidia	Bacteroidales	Muribaculaceae	NA	Muribaculaceae bacterium DSM 100764	MH0257	Healthy	0.0796501
MetaHit	MTG	frc	A0A2Y0SWK3	Proteobacteria	Gammaproteobacteria	Enterobacterales	Enterobacteriaceae	Escherichia	Escherichia coli	MH0257	Healthy	0.0068928
MetaHit	MTG	frc	A0A354HZG4	Bacteroidetes	Bacteroidia	Bacteroidales	Porphyromonadaceae	NA	Porphyromonadaceae bacterium	MH0257	Healthy	0.126405
MetaHit	MTG	frc	A0A355Z7A2	Bacteroidetes	Bacteroidia	Bacteroidales	Porphyromonadaceae	NA	Porphyromonadaceae bacterium	MH0257	Healthy	0.2655
MetaHit	MTG	frc	A0A369G9R5	Proteobacteria	Gammaproteobacteria	Enterobacterales	Enterobacteriaceae	Escherichia	Escherichia coli	MH0257	Healthy	0.0068928
MetaHit	MTG	frc	A0A377BTA6	Proteobacteria	Gammaproteobacteria	Enterobacterales	Enterobacteriaceae	Escherichia	Escherichia coli	MH0257	Healthy	0.0455143
MetaHit	MTG	frc	A1ADQ1	Proteobacteria	Gammaproteobacteria	Enterobacterales	Enterobacteriaceae	Escherichia	Escherichia coli APEC O1	MH0257	Healthy	4.23218
MetaHit	MTG	frc	B5YYX4	Proteobacteria	Gammaproteobacteria	Enterobacterales	Enterobacteriaceae	Escherichia	Escherichia coli O157:H7 str. EC4115	MH0257	Healthy	0.0068928
MetaHit	MTG	frc	C3X762	Proteobacteria	Betaproteobacteria	Burkholderiales	Oxalobacteraceae	Oxalobacter	Oxalobacter formigenes HOxBLS	MH0257	Healthy	0.0338137
MetaHit	MTG	frc	O06644	Proteobacteria	Betaproteobacteria	Burkholderiales	Oxalobacteraceae	Oxalobacter	Oxalobacter formigenes	MH0257	Healthy	0.0133991
MetaHit	MTG	frc	R5AR18	Bacteroidetes	Bacteroidia	Bacteroidales	Prevotellaceae	Prevotella	Prevotella sp. CAG:1031	MH0257	Healthy	0.506399
MetaHit	MTG	frc	R5AXI8	Bacteroidetes	Bacteroidia	Bacteroidales	Bacteroidaceae	Bacteroides	Bacteroides sp. CAG:927	MH0257	Healthy	0.073182
MetaHit	MTG	frc	A0A1Q6U8Z5	Proteobacteria	Alphaproteobacteria	Rhodospirillales	Rhodospirillaceae	Azospirillum	Azospirillum sp. 51_20	MH0272	Healthy	0.773058
MetaHit	MTG	frc	A0A377BTA6	Proteobacteria	Gammaproteobacteria	Enterobacterales	Enterobacteriaceae	Escherichia	Escherichia coli	MH0272	Healthy	0.0061646
MetaHit	MTG	frc	A0A0L7BLA3	Actinobacteria	Actinobacteria	Bifidobacteriales	Bifidobacteriaceae	Bifidobacterium	Bifidobacterium animalis subsp. animalis MCC 0483	MH0274	Healthy	0.0047539
MetaHit	MTG	frc	A0A0L8QWJ2	Actinobacteria	Actinobacteria	Streptomycetales	Streptomycetaceae	Streptomyces	Streptomyces varsoviensis	MH0274	Healthy	0.00503822
MetaHit	MTG	frc	A0A0R1UH43	Firmicutes	Bacilli	Lactobacillales	Lactobacillaceae	Lactobacillus	Lactobacillus kalixensis DSM 16043	MH0274	Healthy	0.00940168
MetaHit	MTG	frc	A0A1E3STM3	Actinobacteria	Actinobacteria	Corynebacteriales	Mycobacteriaceae	Mycobacterium	Mycobacterium sherrisii	MH0274	Healthy	0.00503822
MetaHit	MTG	frc	A0A1Q6U8Z5	Proteobacteria	Alphaproteobacteria	Rhodospirillales	Rhodospirillaceae	Azospirillum	Azospirillum sp. 51_20	MH0274	Healthy	0.0548951
MetaHit	MTG	frc	A0A2I6E5X4	Proteobacteria	Gammaproteobacteria	Enterobacterales	Enterobacteriaceae	Enterobacter	Enterobacter cancerogenus	MH0274	Healthy	0.00506244
MetaHit	MTG	frc	A0A377BTA6	Proteobacteria	Gammaproteobacteria	Enterobacterales	Enterobacteriaceae	Escherichia	Escherichia coli	MH0274	Healthy	0.267426
MetaHit	MTG	frc	A1ADQ1	Proteobacteria	Gammaproteobacteria	Enterobacterales	Enterobacteriaceae	Escherichia	Escherichia coli APEC O1	MH0274	Healthy	0.232872
MetaHit	MTG	frc	G1U9U4	Firmicutes	Bacilli	Lactobacillales	Lactobacillaceae	Lactobacillus	Lactobacillus acidophilus	MH0274	Healthy	0.00946506
MetaHit	MTG	frc	A0A072MW66	Actinobacteria	Actinobacteria	Bifidobacteriales	Bifidobacteriaceae	Bifidobacterium	Bifidobacterium pseudocatenulatum IPLA36007	MH0275	Healthy	0.226669
MetaHit	MTG	frc	A0A174BHB6	Actinobacteria	Actinobacteria	Bifidobacteriales	Bifidobacteriaceae	Bifidobacterium	Bifidobacterium pseudocatenulatum	MH0275	Healthy	0.0261541
MetaHit	MTG	frc	A0A377BTA6	Proteobacteria	Gammaproteobacteria	Enterobacterales	Enterobacteriaceae	Escherichia	Escherichia coli	MH0275	Healthy	0.0444086
MetaHit	MTG	frc	A1ADQ1	Proteobacteria	Gammaproteobacteria	Enterobacterales	Enterobacteriaceae	Escherichia	Escherichia coli APEC O1	MH0275	Healthy	0.0294234
MetaHit	MTG	frc	C3X2D4	Proteobacteria	Betaproteobacteria	Burkholderiales	Oxalobacteraceae	Oxalobacter	Oxalobacter formigenes HOxBLS	MH0276	Healthy	0.00622402
MetaHit	MTG	frc	C3X762	Proteobacteria	Betaproteobacteria	Burkholderiales	Oxalobacteraceae	Oxalobacter	Oxalobacter formigenes HOxBLS	MH0276	Healthy	0.105309
MetaHit	MTG	frc	O06644	Proteobacteria	Betaproteobacteria	Burkholderiales	Oxalobacteraceae	Oxalobacter	Oxalobacter formigenes	MH0276	Healthy	0.0552309
MetaHit	MTG	frc	A0A023Z0D7	Proteobacteria	Gammaproteobacteria	Enterobacterales	Enterobacteriaceae	Escherichia	Escherichia coli O145:H28 str. RM12581	MH0277	Healthy	0.0229369
MetaHit	MTG	frc	A0A024KXD2	Proteobacteria	Gammaproteobacteria	Enterobacterales	Enterobacteriaceae	Escherichia	Escherichia coli D6-113.11	MH0277	Healthy	0.0108068
MetaHit	MTG	frc	A0A028EDB1	Proteobacteria	Gammaproteobacteria	Enterobacterales	Enterobacteriaceae	Escherichia	Escherichia coli O118:H16 str. 2009C-4446	MH0277	Healthy	0.0108068
MetaHit	MTG	frc	A0A070SKW5	Proteobacteria	Gammaproteobacteria	Enterobacterales	Enterobacteriaceae	Escherichia	Escherichia coli 2-210-07_S3_C3	MH0277	Healthy	0.033501
MetaHit	MTG	frc	A0A0D6FY31	Actinobacteria	Actinobacteria	Corynebacteriales	Mycobacteriaceae	Mycolicibacterium	Mycolicibacterium smegmatis	MH0277	Healthy	0.0104225
MetaHit	MTG	frc	A0A0E1SU03	Proteobacteria	Gammaproteobacteria	Enterobacterales	Enterobacteriaceae	Escherichia	Escherichia coli 53638	MH0277	Healthy	0.0108068
MetaHit	MTG	frc	A0A0H2QXU0	Proteobacteria	Gammaproteobacteria	Enterobacterales	Morganellaceae	Moellerella	Moellerella wisconsensis	MH0277	Healthy	0.0212275
MetaHit	MTG	frc	A0A0K4YN22	Proteobacteria	Gammaproteobacteria	Enterobacterales	Enterobacteriaceae	Escherichia	Escherichia coli	MH0277	Healthy	0.0105228
MetaHit	MTG	frc	A0A0L0ALL8	Proteobacteria	Gammaproteobacteria	Enterobacterales	Enterobacteriaceae	Klebsiella	Klebsiella sp. RIT-PI-d	MH0277	Healthy	0.0159262
MetaHit	MTG	frc	A0A0L7ANW7	Proteobacteria	Gammaproteobacteria	Enterobacterales	Enterobacteriaceae	Escherichia	Escherichia coli	MH0277	Healthy	0.026733
MetaHit	MTG	frc	A0A0L8QWJ2	Actinobacteria	Actinobacteria	Streptomycetales	Streptomycetaceae	Streptomyces	Streptomyces varsoviensis	MH0277	Healthy	0.0104724
MetaHit	MTG	frc	A0A0S2PGR5	Actinobacteria	Actinobacteria	Streptomycetales	Streptomycetaceae	Streptomyces	Streptomyces hygroscopicus subsp. limoneus	MH0277	Healthy	0.0106785
MetaHit	MTG	frc	A0A140NM80	Proteobacteria	Gammaproteobacteria	Enterobacterales	Morganellaceae	Providencia	Providencia stuartii MRSN 2154	MH0277	Healthy	0.01585
MetaHit	MTG	frc	A0A158D0I4	Proteobacteria	Betaproteobacteria	Burkholderiales	Burkholderiaceae	Caballeronia	Caballeronia glebae	MH0277	Healthy	0.0160682
MetaHit	MTG	frc	A0A1B1WGN2	Actinobacteria	Actinobacteria	Corynebacteriales	Mycobacteriaceae	Mycobacterium	Mycobacterium sp. djl-10	MH0277	Healthy	0.0105284
MetaHit	MTG	frc	A0A1B7JUB4	Proteobacteria	Gammaproteobacteria	Enterobacterales	Morganellaceae	Providencia	Providencia heimbachae ATCC 35613	MH0277	Healthy	0.0213689
MetaHit	MTG	frc	A0A1B8SW58	Proteobacteria	Gammaproteobacteria	Enterobacterales	Morganellaceae	Providencia	Providencia rettgeri	MH0277	Healthy	0.0107551
MetaHit	MTG	frc	A0A1C7CW93	Proteobacteria	Gammaproteobacteria	Enterobacterales	Enterobacteriaceae	Escherichia	Escherichia coli	MH0277	Healthy	0.0106138
MetaHit	MTG	frc	A0A1E3N450	Proteobacteria	Gammaproteobacteria	Enterobacterales	Enterobacteriaceae	Shigella	Shigella sp. FC569	MH0277	Healthy	0.0108068
MetaHit	MTG	frc	A0A1E3STM3	Actinobacteria	Actinobacteria	Corynebacteriales	Mycobacteriaceae	Mycobacterium	Mycobacterium sherrisii	MH0277	Healthy	0.0636826
MetaHit	MTG	frc	A0A1H1JMZ9	Proteobacteria	Betaproteobacteria	Burkholderiales	Burkholderiaceae	Paraburkholderia	Paraburkholderia fungorum	MH0277	Healthy	0.0105228
MetaHit	MTG	frc	A0A1H4GVH9	Proteobacteria	Betaproteobacteria	Burkholderiales	Burkholderiaceae	Paraburkholderia	Paraburkholderia sartisoli	MH0277	Healthy	0.0105228
MetaHit	MTG	frc	A0A1I1DMD5	Proteobacteria	Betaproteobacteria	Burkholderiales	Oxalobacteraceae	Collimonas	Collimonas sp. OK412	MH0277	Healthy	0.010628
MetaHit	MTG	frc	A0A1J0DQ32	Proteobacteria	Betaproteobacteria	Burkholderiales	Burkholderiaceae	Polynucleobacter	Polynucleobacter asymbioticus	MH0277	Healthy	0.0105228
MetaHit	MTG	frc	A0A1J0EDS7	Proteobacteria	Gammaproteobacteria	Enterobacterales	Morganellaceae	Providencia	Providencia rettgeri	MH0277	Healthy	0.0367948
MetaHit	MTG	frc	A0A1U9T5R4	Proteobacteria	Gammaproteobacteria	Enterobacterales	Enterobacteriaceae	Escherichia	Escherichia coli	MH0277	Healthy	0.0105228
MetaHit	MTG	frc	A0A1X2AYA3	Actinobacteria	Actinobacteria	Corynebacteriales	Mycobacteriaceae	Mycobacterium	Mycobacterium parmense	MH0277	Healthy	0.0104975
MetaHit	MTG	frc	A0A1X3KZX2	Proteobacteria	Gammaproteobacteria	Enterobacterales	Enterobacteriaceae	Escherichia	Escherichia coli H420	MH0277	Healthy	0.0159262
MetaHit	MTG	frc	A0A209A2M1	Proteobacteria	Gammaproteobacteria	Enterobacterales	Yersiniaceae	Yersinia	Yersinia frederiksenii	MH0277	Healthy	0.0107945
MetaHit	MTG	frc	A0A2I6E5X4	Proteobacteria	Gammaproteobacteria	Enterobacterales	Enterobacteriaceae	Enterobacter	Enterobacter cancerogenus	MH0277	Healthy	0.0159262
MetaHit	MTG	frc	A0A2S8JKC0	Proteobacteria	Gammaproteobacteria	Enterobacterales	Enterobacteriaceae	Escherichia	Escherichia coli	MH0277	Healthy	0.0214716
MetaHit	MTG	frc	A0A2X5G0L0	Proteobacteria	Gammaproteobacteria	Enterobacterales	Enterobacteriaceae	Escherichia	Escherichia coli	MH0277	Healthy	0.0115197
MetaHit	MTG	frc	A0A2Z2J8H3	Proteobacteria	Gammaproteobacteria	Enterobacterales	Enterobacteriaceae	Escherichia	Escherichia coli	MH0277	Healthy	0.0106648
MetaHit	MTG	frc	A0A365NWD8	Proteobacteria	Betaproteobacteria	Burkholderiales	Oxalobacteraceae	Herminiimonas	Herminiimonas fonticola	MH0277	Healthy	0.0105228
MetaHit	MTG	frc	A0A377BTA6	Proteobacteria	Gammaproteobacteria	Enterobacterales	Enterobacteriaceae	Escherichia	Escherichia coli	MH0277	Healthy	10.3215
MetaHit	MTG	frc	A1ADQ1	Proteobacteria	Gammaproteobacteria	Enterobacterales	Enterobacteriaceae	Escherichia	Escherichia coli APEC O1	MH0277	Healthy	59.9883
MetaHit	MTG	frc	Q3YZF6	Proteobacteria	Gammaproteobacteria	Enterobacterales	Enterobacteriaceae	Shigella	Shigella sonnei Ss046	MH0277	Healthy	0.0315683
MetaHit	MTG	frc	Q8FFE8	Proteobacteria	Gammaproteobacteria	Enterobacterales	Enterobacteriaceae	Escherichia	Escherichia coli CFT073	MH0277	Healthy	0.779524
MetaHit	MTG	frc	V0UR98	Proteobacteria	Gammaproteobacteria	Enterobacterales	Enterobacteriaceae	Escherichia	Escherichia coli 908519	MH0277	Healthy	0.0117996
MetaHit	MTG	frc	A0A1Q6U8Z5	Proteobacteria	Alphaproteobacteria	Rhodospirillales	Rhodospirillaceae	Azospirillum	Azospirillum sp. 51_20	MH0286	Healthy	0.193203
MetaHit	MTG	frc	C3X762	Proteobacteria	Betaproteobacteria	Burkholderiales	Oxalobacteraceae	Oxalobacter	Oxalobacter formigenes HOxBLS	MH0286	Healthy	0.0881337
MetaHit	MTG	frc	H1RYM1	Proteobacteria	Betaproteobacteria	Burkholderiales	Burkholderiaceae	Cupriavidus	Cupriavidus basilensis OR16	MH0286	Healthy	0.00404423
MetaHit	MTG	frc	O06644	Proteobacteria	Betaproteobacteria	Burkholderiales	Oxalobacteraceae	Oxalobacter	Oxalobacter formigenes	MH0286	Healthy	0.0317491
MetaHit	MTG	frc	A0A072MW66	Actinobacteria	Actinobacteria	Bifidobacteriales	Bifidobacteriaceae	Bifidobacterium	Bifidobacterium pseudocatenulatum IPLA36007	MH0287	Healthy	0.012952
MetaHit	MTG	frc	A0A1V8Q5N2	Actinobacteria	Actinobacteria	Bifidobacteriales	Bifidobacteriaceae	Bifidobacterium	Bifidobacterium dentium	MH0287	Healthy	0.0192498
MetaHit	MTG	frc	A0A377BTA6	Proteobacteria	Gammaproteobacteria	Enterobacterales	Enterobacteriaceae	Escherichia	Escherichia coli	MH0287	Healthy	0.126877
MetaHit	MTG	frc	A1ADQ1	Proteobacteria	Gammaproteobacteria	Enterobacterales	Enterobacteriaceae	Escherichia	Escherichia coli APEC O1	MH0287	Healthy	0.0201753
MetaHit	MTG	frc	A0A1F3ZN52	Proteobacteria	Betaproteobacteria	NA	NA	NA	Betaproteobacteria bacterium RIFCSPLOWO2_02_FULL_6	MH0288	Healthy	0.00684515
MetaHit	MTG	frc	A0A377BTA6	Proteobacteria	Gammaproteobacteria	Enterobacterales	Enterobacteriaceae	Escherichia	Escherichia coli	MH0288	Healthy	0.0131626
MetaHit	MTG	frc	C3X762	Proteobacteria	Betaproteobacteria	Burkholderiales	Oxalobacteraceae	Oxalobacter	Oxalobacter formigenes HOxBLS	MH0288	Healthy	0.109522
MetaHit	MTG	frc	O06644	Proteobacteria	Betaproteobacteria	Burkholderiales	Oxalobacteraceae	Oxalobacter	Oxalobacter formigenes	MH0288	Healthy	0.0271247
MetaHit	MTG	frc	A1ADQ1	Proteobacteria	Gammaproteobacteria	Enterobacterales	Enterobacteriaceae	Escherichia	Escherichia coli APEC O1	MH0289	Healthy	0.0109261
MetaHit	MTG	frc	C3X762	Proteobacteria	Betaproteobacteria	Burkholderiales	Oxalobacteraceae	Oxalobacter	Oxalobacter formigenes HOxBLS	MH0292	Healthy	0.0552384
MetaHit	MTG	frc	O06644	Proteobacteria	Betaproteobacteria	Burkholderiales	Oxalobacteraceae	Oxalobacter	Oxalobacter formigenes	MH0292	Healthy	0.00781745
MetaHit	MTG	frc	A1ADQ1	Proteobacteria	Gammaproteobacteria	Enterobacterales	Enterobacteriaceae	Escherichia	Escherichia coli APEC O1	MH0302	Healthy	0.134619
MetaHit	MTG	frc	B7MY33	Proteobacteria	Gammaproteobacteria	Enterobacterales	Enterobacteriaceae	Escherichia	Escherichia coli ED1a	MH0302	Healthy	0.00708523
MetaHit	MTG	frc	A1ADQ1	Proteobacteria	Gammaproteobacteria	Enterobacterales	Enterobacteriaceae	Escherichia	Escherichia coli APEC O1	MH0305	Healthy	0.0157985
MetaHit	MTG	frc	C3X762	Proteobacteria	Betaproteobacteria	Burkholderiales	Oxalobacteraceae	Oxalobacter	Oxalobacter formigenes HOxBLS	MH0307	Healthy	0.0402119
MetaHit	MTG	frc	A0A1Q6U8Z5	Proteobacteria	Alphaproteobacteria	Rhodospirillales	Rhodospirillaceae	Azospirillum	Azospirillum sp. 51_20	MH0316	Healthy	0.203801
MetaHit	MTG	frc	A0A377BTA6	Proteobacteria	Gammaproteobacteria	Enterobacterales	Enterobacteriaceae	Escherichia	Escherichia coli	MH0316	Healthy	0.00609439
MetaHit	MTG	frc	A1ADQ1	Proteobacteria	Gammaproteobacteria	Enterobacterales	Enterobacteriaceae	Escherichia	Escherichia coli APEC O1	MH0316	Healthy	0.00646064
MetaHit	MTG	frc	A0A028EDB1	Proteobacteria	Gammaproteobacteria	Enterobacterales	Enterobacteriaceae	Escherichia	Escherichia coli O118:H16 str. 2009C-4446	MH0318	Healthy	0.00664833
MetaHit	MTG	frc	A0A1C7CW93	Proteobacteria	Gammaproteobacteria	Enterobacterales	Enterobacteriaceae	Escherichia	Escherichia coli	MH0318	Healthy	0.00661652
MetaHit	MTG	frc	A0A1F4IAS5	Proteobacteria	Betaproteobacteria	Burkholderiales	NA	NA	Burkholderiales bacterium RIFCSPHIGHO2_12_FULL_61_	MH0318	Healthy	0.00658502
MetaHit	MTG	frc	A0A2V1IPP0	Bacteroidetes	Bacteroidia	Bacteroidales	Muribaculaceae	NA	Muribaculaceae bacterium DSM 103720	MH0318	Healthy	0.0127159
MetaHit	MTG	frc	A0A2V1J0Z5	Bacteroidetes	Bacteroidia	Bacteroidales	Muribaculaceae	NA	Muribaculaceae bacterium DSM 100764	MH0318	Healthy	0.0064021
MetaHit	MTG	frc	A0A354HZG4	Bacteroidetes	Bacteroidia	Bacteroidales	Porphyromonadaceae	NA	Porphyromonadaceae bacterium	MH0318	Healthy	0.0128339
MetaHit	MTG	frc	A0A377BTA6	Proteobacteria	Gammaproteobacteria	Enterobacterales	Enterobacteriaceae	Escherichia	Escherichia coli	MH0318	Healthy	0.0250858
MetaHit	MTG	frc	A1ADQ1	Proteobacteria	Gammaproteobacteria	Enterobacterales	Enterobacteriaceae	Escherichia	Escherichia coli APEC O1	MH0318	Healthy	2.02109
MetaHit	MTG	frc	C3X762	Proteobacteria	Betaproteobacteria	Burkholderiales	Oxalobacteraceae	Oxalobacter	Oxalobacter formigenes HOxBLS	MH0318	Healthy	0.117412
MetaHit	MTG	frc	O06644	Proteobacteria	Betaproteobacteria	Burkholderiales	Oxalobacteraceae	Oxalobacter	Oxalobacter formigenes	MH0318	Healthy	0.0516955
MetaHit	MTG	frc	Q8FFE8	Proteobacteria	Gammaproteobacteria	Enterobacterales	Enterobacteriaceae	Escherichia	Escherichia coli CFT073	MH0318	Healthy	0.00664833
MetaHit	MTG	frc	A0A1F4IAS5	Proteobacteria	Betaproteobacteria	Burkholderiales	NA	NA	Burkholderiales bacterium RIFCSPHIGHO2_12_FULL_61_	MH0321	Healthy	0.00621931
MetaHit	MTG	frc	A0A1Q6U8Z5	Proteobacteria	Alphaproteobacteria	Rhodospirillales	Rhodospirillaceae	Azospirillum	Azospirillum sp. 51_20	MH0321	Healthy	0.00618984
MetaHit	MTG	frc	A0A2X5G0L0	Proteobacteria	Gammaproteobacteria	Enterobacterales	Enterobacteriaceae	Escherichia	Escherichia coli	MH0321	Healthy	0.00687398
MetaHit	MTG	frc	A0A369G9R5	Proteobacteria	Gammaproteobacteria	Enterobacterales	Enterobacteriaceae	Escherichia	Escherichia coli	MH0321	Healthy	0.00627912
MetaHit	MTG	frc	A0A377BTA6	Proteobacteria	Gammaproteobacteria	Enterobacterales	Enterobacteriaceae	Escherichia	Escherichia coli	MH0321	Healthy	0.183618
MetaHit	MTG	frc	A1ADQ1	Proteobacteria	Gammaproteobacteria	Enterobacterales	Enterobacteriaceae	Escherichia	Escherichia coli APEC O1	MH0321	Healthy	0.150699
MetaHit	MTG	frc	B5YYX4	Proteobacteria	Gammaproteobacteria	Enterobacterales	Enterobacteriaceae	Escherichia	Escherichia coli O157:H7 str. EC4115	MH0321	Healthy	0.0125582
MetaHit	MTG	frc	C3X762	Proteobacteria	Betaproteobacteria	Burkholderiales	Oxalobacteraceae	Oxalobacter	Oxalobacter formigenes HOxBLS	MH0321	Healthy	0.00616064
MetaHit	MTG	frc	O06644	Proteobacteria	Betaproteobacteria	Burkholderiales	Oxalobacteraceae	Oxalobacter	Oxalobacter formigenes	MH0321	Healthy	0.0366184
MetaHit	MTG	frc	A0A1B1SBJ2	Bacteroidetes	Bacteroidia	Bacteroidales	Muribaculaceae	Muribaculum	Muribaculum intestinale	MH0322	Healthy	0.0061216
MetaHit	MTG	frc	A0A1Q6U8Z5	Proteobacteria	Alphaproteobacteria	Rhodospirillales	Rhodospirillaceae	Azospirillum	Azospirillum sp. 51_20	MH0322	Healthy	0.581871
MetaHit	MTG	frc	C3X762	Proteobacteria	Betaproteobacteria	Burkholderiales	Oxalobacteraceae	Oxalobacter	Oxalobacter formigenes HOxBLS	MH0322	Healthy	0.0377691
MetaHit	MTG	frc	O06644	Proteobacteria	Betaproteobacteria	Burkholderiales	Oxalobacteraceae	Oxalobacter	Oxalobacter formigenes	MH0322	Healthy	0.012472
MetaHit	MTG	frc	A1ADQ1	Proteobacteria	Gammaproteobacteria	Enterobacterales	Enterobacteriaceae	Escherichia	Escherichia coli APEC O1	MH0333	Healthy	0.00697977
MetaHit	MTG	frc	A0A072MW66	Actinobacteria	Actinobacteria	Bifidobacteriales	Bifidobacteriaceae	Bifidobacterium	Bifidobacterium pseudocatenulatum IPLA36007	MH0403	Healthy	0.113162
MetaHit	MTG	frc	A0A1B1SBJ2	Bacteroidetes	Bacteroidia	Bacteroidales	Muribaculaceae	Muribaculum	Muribaculum intestinale	MH0403	Healthy	0.0124581
MetaHit	MTG	frc	A0A1Q6EIZ9	Bacteroidetes	Bacteroidia	Bacteroidales	NA	NA	Bacteroidales bacterium 52_46	MH0403	Healthy	0.0125156
MetaHit	MTG	frc	A0A1Q6EPI6	Actinobacteria	Actinobacteria	Bifidobacteriales	Bifidobacteriaceae	Bifidobacterium	Bifidobacterium sp. 56_9_plus	MH0403	Healthy	0.0120438
MetaHit	MTG	frc	A0A1Q6U8Z5	Proteobacteria	Alphaproteobacteria	Rhodospirillales	Rhodospirillaceae	Azospirillum	Azospirillum sp. 51_20	MH0403	Healthy	0.643573
MetaHit	MTG	frc	A0A2V1IPP0	Bacteroidetes	Bacteroidia	Bacteroidales	Muribaculaceae	NA	Muribaculaceae bacterium DSM 103720	MH0403	Healthy	0.0124868
MetaHit	MTG	frc	A0A354HZG4	Bacteroidetes	Bacteroidia	Bacteroidales	Porphyromonadaceae	NA	Porphyromonadaceae bacterium	MH0403	Healthy	0.0252054
MetaHit	MTG	frc	A0A355Z7A2	Bacteroidetes	Bacteroidia	Bacteroidales	Porphyromonadaceae	NA	Porphyromonadaceae bacterium	MH0403	Healthy	0.050294
MetaHit	MTG	frc	A1ADQ1	Proteobacteria	Gammaproteobacteria	Enterobacterales	Enterobacteriaceae	Escherichia	Escherichia coli APEC O1	MH0403	Healthy	0.0130571
MetaHit	MTG	frc	C3X762	Proteobacteria	Betaproteobacteria	Burkholderiales	Oxalobacteraceae	Oxalobacter	Oxalobacter formigenes HOxBLS	MH0403	Healthy	0.140918
MetaHit	MTG	frc	O06644	Proteobacteria	Betaproteobacteria	Burkholderiales	Oxalobacteraceae	Oxalobacter	Oxalobacter formigenes	MH0403	Healthy	0.0634551
MetaHit	MTG	frc	R5AR18	Bacteroidetes	Bacteroidia	Bacteroidales	Prevotellaceae	Prevotella	Prevotella sp. CAG:1031	MH0403	Healthy	0.0124581
MetaHit	MTG	frc	R5AXI8	Bacteroidetes	Bacteroidia	Bacteroidales	Bacteroidaceae	Bacteroides	Bacteroides sp. CAG:927	MH0403	Healthy	0.0504107
MetaHit	MTG	frc	A0A072MW66	Actinobacteria	Actinobacteria	Bifidobacteriales	Bifidobacteriaceae	Bifidobacterium	Bifidobacterium pseudocatenulatum IPLA36007	MH0404	Healthy	0.00696728
MetaHit	MTG	frc	A0A377BTA6	Proteobacteria	Gammaproteobacteria	Enterobacterales	Enterobacteriaceae	Escherichia	Escherichia coli	MH0404	Healthy	0.0204753
MetaHit	MTG	frc	A1ADQ1	Proteobacteria	Gammaproteobacteria	Enterobacterales	Enterobacteriaceae	Escherichia	Escherichia coli APEC O1	MH0404	Healthy	0.00723525
MetaHit	MTG	frc	O06644	Proteobacteria	Betaproteobacteria	Burkholderiales	Oxalobacteraceae	Oxalobacter	Oxalobacter formigenes	MH0404	Healthy	0.00703239
MetaHit	MTG	frc	A0A377BTA6	Proteobacteria	Gammaproteobacteria	Enterobacterales	Enterobacteriaceae	Escherichia	Escherichia coli	MH0405	Healthy	0.0062457
MetaHit	MTG	frc	A0A140NM80	Proteobacteria	Gammaproteobacteria	Enterobacterales	Morganellaceae	Providencia	Providencia stuartii MRSN 2154	MH0407	Healthy	0.00647837
MetaHit	MTG	frc	A0A1F3ZN52	Proteobacteria	Betaproteobacteria	NA	NA	NA	Betaproteobacteria bacterium RIFCSPLOWO2_02_FULL_6	MH0407	Healthy	0.0063867
MetaHit	MTG	frc	A1ADQ1	Proteobacteria	Gammaproteobacteria	Enterobacterales	Enterobacteriaceae	Escherichia	Escherichia coli APEC O1	MH0407	Healthy	0.00650952
MetaHit	MTG	frc	C3X762	Proteobacteria	Betaproteobacteria	Burkholderiales	Oxalobacteraceae	Oxalobacter	Oxalobacter formigenes HOxBLS	MH0407	Healthy	0.114961
MetaHit	MTG	frc	H1RYM1	Proteobacteria	Betaproteobacteria	Burkholderiales	Burkholderiaceae	Cupriavidus	Cupriavidus basilensis OR16	MH0407	Healthy	0.00322376
MetaHit	MTG	frc	O06644	Proteobacteria	Betaproteobacteria	Burkholderiales	Oxalobacteraceae	Oxalobacter	Oxalobacter formigenes	MH0407	Healthy	0.025308
MetaHit	MTG	frc	A0A1Q6U8Z5	Proteobacteria	Alphaproteobacteria	Rhodospirillales	Rhodospirillaceae	Azospirillum	Azospirillum sp. 51_20	MH0408	Healthy	0.605658
MetaHit	MTG	frc	A0A2A2YVB9	Actinobacteria	Actinobacteria	Streptomycetales	Streptomycetaceae	Streptomyces	Streptomyces sp. SA15	MH0408	Healthy	0.00599465
MetaHit	MTG	frc	A0A377BTA6	Proteobacteria	Gammaproteobacteria	Enterobacterales	Enterobacteriaceae	Escherichia	Escherichia coli	MH0408	Healthy	0.073866
MetaHit	MTG	frc	A1ADQ1	Proteobacteria	Gammaproteobacteria	Enterobacterales	Enterobacteriaceae	Escherichia	Escherichia coli APEC O1	MH0408	Healthy	0.00602347
MetaHit	MTG	frc	C3X762	Proteobacteria	Betaproteobacteria	Burkholderiales	Oxalobacteraceae	Oxalobacter	Oxalobacter formigenes HOxBLS	MH0408	Healthy	0.0709178
MetaHit	MTG	frc	H1RYM1	Proteobacteria	Betaproteobacteria	Burkholderiales	Burkholderiaceae	Cupriavidus	Cupriavidus basilensis OR16	MH0408	Healthy	0.00298305
MetaHit	MTG	frc	O06644	Proteobacteria	Betaproteobacteria	Burkholderiales	Oxalobacteraceae	Oxalobacter	Oxalobacter formigenes	MH0408	Healthy	0.0234183
MetaHit	MTG	frc	A0A1F4IAS5	Proteobacteria	Betaproteobacteria	Burkholderiales	NA	NA	Burkholderiales bacterium RIFCSPHIGHO2_12_FULL_61_	MH0409	Healthy	0.00704662
MetaHit	MTG	frc	A0A2W5RAA1	Proteobacteria	Alphaproteobacteria	Rhizobiales	Xanthobacteraceae	Starkeya	Starkeya novella	MH0409	Healthy	0.00696372
MetaHit	MTG	frc	C3X762	Proteobacteria	Betaproteobacteria	Burkholderiales	Oxalobacteraceae	Oxalobacter	Oxalobacter formigenes HOxBLS	MH0409	Healthy	0.048861
MetaHit	MTG	frc	H1RYM1	Proteobacteria	Betaproteobacteria	Burkholderiales	Burkholderiaceae	Cupriavidus	Cupriavidus basilensis OR16	MH0409	Healthy	0.00352331
MetaHit	MTG	frc	O06644	Proteobacteria	Betaproteobacteria	Burkholderiales	Oxalobacteraceae	Oxalobacter	Oxalobacter formigenes	MH0409	Healthy	0.0414895
MetaHit	MTG	frc	A0A072MW66	Actinobacteria	Actinobacteria	Bifidobacteriales	Bifidobacteriaceae	Bifidobacterium	Bifidobacterium pseudocatenulatum IPLA36007	MH0410	Healthy	0.580595
MetaHit	MTG	frc	A0A174BHB6	Actinobacteria	Actinobacteria	Bifidobacteriales	Bifidobacteriaceae	Bifidobacterium	Bifidobacterium pseudocatenulatum	MH0410	Healthy	0.0574215
MetaHit	MTG	frc	A0A1B1SBJ2	Bacteroidetes	Bacteroidia	Bacteroidales	Muribaculaceae	Muribaculum	Muribaculum intestinale	MH0410	Healthy	0.00684844
MetaHit	MTG	frc	A0A1Q6EIZ9	Bacteroidetes	Bacteroidia	Bacteroidales	NA	NA	Bacteroidales bacterium 52_46	MH0410	Healthy	1.01136
MetaHit	MTG	frc	A0A1Q6EPI6	Actinobacteria	Actinobacteria	Bifidobacteriales	Bifidobacteriaceae	Bifidobacterium	Bifidobacterium sp. 56_9_plus	MH0410	Healthy	0.0264826
MetaHit	MTG	frc	A0A2V1J0Z5	Bacteroidetes	Bacteroidia	Bacteroidales	Muribaculaceae	NA	Muribaculaceae bacterium DSM 100764	MH0410	Healthy	0.00691185
MetaHit	MTG	frc	A0A2X5G0L0	Proteobacteria	Gammaproteobacteria	Enterobacterales	Enterobacteriaceae	Escherichia	Escherichia coli	MH0410	Healthy	0.00785768
MetaHit	MTG	frc	A0A354HZG4	Bacteroidetes	Bacteroidia	Bacteroidales	Porphyromonadaceae	NA	Porphyromonadaceae bacterium	MH0410	Healthy	0.00692788
MetaHit	MTG	frc	A0A377BTA6	Proteobacteria	Gammaproteobacteria	Enterobacterales	Enterobacteriaceae	Escherichia	Escherichia coli	MH0410	Healthy	0.0135416
MetaHit	MTG	frc	A1ADQ1	Proteobacteria	Gammaproteobacteria	Enterobacterales	Enterobacteriaceae	Escherichia	Escherichia coli APEC O1	MH0410	Healthy	0.00717769
MetaHit	MTG	frc	A0A1Q6EIZ9	Bacteroidetes	Bacteroidia	Bacteroidales	NA	NA	Bacteroidales bacterium 52_46	MH0411	Healthy	0.0185652
MetaHit	MTG	frc	A0A2V1J0Z5	Bacteroidetes	Bacteroidia	Bacteroidales	Muribaculaceae	NA	Muribaculaceae bacterium DSM 100764	MH0411	Healthy	0.0870387
MetaHit	MTG	frc	A0A354HZG4	Bacteroidetes	Bacteroidia	Bacteroidales	Porphyromonadaceae	NA	Porphyromonadaceae bacterium	MH0411	Healthy	0.0934721
MetaHit	MTG	frc	A0A355Z7A2	Bacteroidetes	Bacteroidia	Bacteroidales	Porphyromonadaceae	NA	Porphyromonadaceae bacterium	MH0411	Healthy	0.00621705
MetaHit	MTG	frc	C3X762	Proteobacteria	Betaproteobacteria	Burkholderiales	Oxalobacteraceae	Oxalobacter	Oxalobacter formigenes HOxBLS	MH0411	Healthy	0.019003
MetaHit	MTG	frc	O06644	Proteobacteria	Betaproteobacteria	Burkholderiales	Oxalobacteraceae	Oxalobacter	Oxalobacter formigenes	MH0411	Healthy	0.0188255
MetaHit	MTG	frc	R5AR18	Bacteroidetes	Bacteroidia	Bacteroidales	Prevotellaceae	Prevotella	Prevotella sp. CAG:1031	MH0411	Healthy	0.0554401
MetaHit	MTG	frc	R5AXI8	Bacteroidetes	Bacteroidia	Bacteroidales	Bacteroidaceae	Bacteroides	Bacteroides sp. CAG:927	MH0411	Healthy	0.00623147
MetaHit	MTG	frc	A0A1Q6U8Z5	Proteobacteria	Alphaproteobacteria	Rhodospirillales	Rhodospirillaceae	Azospirillum	Azospirillum sp. 51_20	MH0412	Healthy	0.253747
MetaHit	MTG	frc	A1ADQ1	Proteobacteria	Gammaproteobacteria	Enterobacterales	Enterobacteriaceae	Escherichia	Escherichia coli APEC O1	MH0412	Healthy	0.0715018
MetaHit	MTG	frc	B5YYX4	Proteobacteria	Gammaproteobacteria	Enterobacterales	Enterobacteriaceae	Escherichia	Escherichia coli O157:H7 str. EC4115	MH0412	Healthy	0.0143004
MetaHit	MTG	frc	C3X762	Proteobacteria	Betaproteobacteria	Burkholderiales	Oxalobacteraceae	Oxalobacter	Oxalobacter formigenes HOxBLS	MH0412	Healthy	0.0140305
MetaHit	MTG	frc	A0A1B1SBJ2	Bacteroidetes	Bacteroidia	Bacteroidales	Muribaculaceae	Muribaculum	Muribaculum intestinale	MH0413	Healthy	0.0072275
MetaHit	MTG	frc	A0A1Q6U8Z5	Proteobacteria	Alphaproteobacteria	Rhodospirillales	Rhodospirillaceae	Azospirillum	Azospirillum sp. 51_20	MH0413	Healthy	0.619784
MetaHit	MTG	frc	A0A1V8Q5N2	Actinobacteria	Actinobacteria	Bifidobacteriales	Bifidobacteriaceae	Bifidobacterium	Bifidobacterium dentium	MH0413	Healthy	0.0072275
MetaHit	MTG	frc	C3X762	Proteobacteria	Betaproteobacteria	Burkholderiales	Oxalobacteraceae	Oxalobacter	Oxalobacter formigenes HOxBLS	MH0413	Healthy	0.126345
MetaHit	MTG	frc	H1RYM1	Proteobacteria	Betaproteobacteria	Burkholderiales	Burkholderiaceae	Cupriavidus	Cupriavidus basilensis OR16	MH0413	Healthy	0.00375141
MetaHit	MTG	frc	O06644	Proteobacteria	Betaproteobacteria	Burkholderiales	Oxalobacteraceae	Oxalobacter	Oxalobacter formigenes	MH0413	Healthy	0.0883511
MetaHit	MTG	frc	A0A1Q6U8Z5	Proteobacteria	Alphaproteobacteria	Rhodospirillales	Rhodospirillaceae	Azospirillum	Azospirillum sp. 51_20	MH0415	Healthy	0.0229624
MetaHit	MTG	frc	A0A1V8Q5N2	Actinobacteria	Actinobacteria	Bifidobacteriales	Bifidobacteriaceae	Bifidobacterium	Bifidobacterium dentium	MH0415	Healthy	0.0148167
MetaHit	MTG	frc	A0A2V1IPP0	Bacteroidetes	Bacteroidia	Bacteroidales	Muribaculaceae	NA	Muribaculaceae bacterium DSM 103720	MH0415	Healthy	0.0445523
MetaHit	MTG	frc	A0A2V1J0Z5	Bacteroidetes	Bacteroidia	Bacteroidales	Muribaculaceae	NA	Muribaculaceae bacterium DSM 100764	MH0415	Healthy	0.373848
MetaHit	MTG	frc	A0A354HZG4	Bacteroidetes	Bacteroidia	Bacteroidales	Porphyromonadaceae	NA	Porphyromonadaceae bacterium	MH0415	Healthy	2.06093
MetaHit	MTG	frc	A0A355Z7A2	Bacteroidetes	Bacteroidia	Bacteroidales	Porphyromonadaceae	NA	Porphyromonadaceae bacterium	MH0415	Healthy	0.0897234
MetaHit	MTG	frc	C3X762	Proteobacteria	Betaproteobacteria	Burkholderiales	Oxalobacteraceae	Oxalobacter	Oxalobacter formigenes HOxBLS	MH0415	Healthy	0.0837983
MetaHit	MTG	frc	O06644	Proteobacteria	Betaproteobacteria	Burkholderiales	Oxalobacteraceae	Oxalobacter	Oxalobacter formigenes	MH0415	Healthy	0.0226405
MetaHit	MTG	frc	R5AXI8	Bacteroidetes	Bacteroidia	Bacteroidales	Bacteroidaceae	Bacteroides	Bacteroides sp. CAG:927	MH0415	Healthy	0.532095
MetaHit	MTG	frc	A0A0R1HAW1	Firmicutes	Bacilli	Lactobacillales	Lactobacillaceae	Lactobacillus	Lactobacillus amylovorus DSM 20531	MH0416	Healthy	0.00626259
MetaHit	MTG	frc	A0A0R1UH43	Firmicutes	Bacilli	Lactobacillales	Lactobacillaceae	Lactobacillus	Lactobacillus kalixensis DSM 16043	MH0416	Healthy	0.00620667
MetaHit	MTG	frc	A0A1F4IAS5	Proteobacteria	Betaproteobacteria	Burkholderiales	NA	NA	Burkholderiales bacterium RIFCSPHIGHO2_12_FULL_61_	MH0416	Healthy	0.00662045
MetaHit	MTG	frc	A0A1V8Q5N2	Actinobacteria	Actinobacteria	Bifidobacteriales	Bifidobacteriaceae	Bifidobacterium	Bifidobacterium dentium	MH0416	Healthy	0.0063775
MetaHit	MTG	frc	A0A2V1J0Z5	Bacteroidetes	Bacteroidia	Bacteroidales	Muribaculaceae	NA	Muribaculaceae bacterium DSM 100764	MH0416	Healthy	0.00643655
MetaHit	MTG	frc	A0A2W5RAA1	Proteobacteria	Alphaproteobacteria	Rhizobiales	Xanthobacteraceae	Starkeya	Starkeya novella	MH0416	Healthy	0.00654256
MetaHit	MTG	frc	A0A354HZG4	Bacteroidetes	Bacteroidia	Bacteroidales	Porphyromonadaceae	NA	Porphyromonadaceae bacterium	MH0416	Healthy	0.012903
MetaHit	MTG	frc	A1ADQ1	Proteobacteria	Gammaproteobacteria	Enterobacterales	Enterobacteriaceae	Escherichia	Escherichia coli APEC O1	MH0416	Healthy	0.00668411
MetaHit	MTG	frc	C3X762	Proteobacteria	Betaproteobacteria	Burkholderiales	Oxalobacteraceae	Oxalobacter	Oxalobacter formigenes HOxBLS	MH0416	Healthy	0.16395
MetaHit	MTG	frc	H1RYM1	Proteobacteria	Betaproteobacteria	Burkholderiales	Burkholderiaceae	Cupriavidus	Cupriavidus basilensis OR16	MH0416	Healthy	0.0132409
MetaHit	MTG	frc	O06644	Proteobacteria	Betaproteobacteria	Burkholderiales	Oxalobacteraceae	Oxalobacter	Oxalobacter formigenes	MH0416	Healthy	0.0649671
MetaHit	MTG	frc	R5AXI8	Bacteroidetes	Bacteroidia	Bacteroidales	Bacteroidaceae	Bacteroides	Bacteroides sp. CAG:927	MH0416	Healthy	0.012903
MetaHit	MTG	frc	A0A1Q6U8Z5	Proteobacteria	Alphaproteobacteria	Rhodospirillales	Rhodospirillaceae	Azospirillum	Azospirillum sp. 51_20	MH0417	Healthy	0.147585
MetaHit	MTG	frc	A0A377BTA6	Proteobacteria	Gammaproteobacteria	Enterobacterales	Enterobacteriaceae	Escherichia	Escherichia coli	MH0417	Healthy	0.317759
MetaHit	MTG	frc	A1ADQ1	Proteobacteria	Gammaproteobacteria	Enterobacterales	Enterobacteriaceae	Escherichia	Escherichia coli APEC O1	MH0417	Healthy	0.106047
MetaHit	MTG	frc	C3X762	Proteobacteria	Betaproteobacteria	Burkholderiales	Oxalobacteraceae	Oxalobacter	Oxalobacter formigenes HOxBLS	MH0417	Healthy	0.128527
MetaHit	MTG	frc	O06644	Proteobacteria	Betaproteobacteria	Burkholderiales	Oxalobacteraceae	Oxalobacter	Oxalobacter formigenes	MH0417	Healthy	0.0363789
MetaHit	MTG	frc	A0A1Q6U8Z5	Proteobacteria	Alphaproteobacteria	Rhodospirillales	Rhodospirillaceae	Azospirillum	Azospirillum sp. 51_20	MH0418	Healthy	0.0684201
MetaHit	MTG	frc	A1ADQ1	Proteobacteria	Gammaproteobacteria	Enterobacterales	Enterobacteriaceae	Escherichia	Escherichia coli APEC O1	MH0418	Healthy	0.00694069
MetaHit	MTG	frc	C3X762	Proteobacteria	Betaproteobacteria	Burkholderiales	Oxalobacteraceae	Oxalobacter	Oxalobacter formigenes HOxBLS	MH0418	Healthy	0.0680973
MetaHit	MTG	frc	O06644	Proteobacteria	Betaproteobacteria	Burkholderiales	Oxalobacteraceae	Oxalobacter	Oxalobacter formigenes	MH0418	Healthy	0.0337304
MetaHit	MTG	frc	A0A087ADU5	Actinobacteria	Actinobacteria	Bifidobacteriales	Bifidobacteriaceae	Bifidobacterium	Bifidobacterium choerinum	MH0419	Healthy	0.00542695
MetaHit	MTG	frc	A0A1Q6EIZ9	Bacteroidetes	Bacteroidia	Bacteroidales	NA	NA	Bacteroidales bacterium 52_46	MH0419	Healthy	0.016656
MetaHit	MTG	frc	A0A1Q6U8Z5	Proteobacteria	Alphaproteobacteria	Rhodospirillales	Rhodospirillaceae	Azospirillum	Azospirillum sp. 51_20	MH0419	Healthy	0.0114197
MetaHit	MTG	frc	A0A2V1J0Z5	Bacteroidetes	Bacteroidia	Bacteroidales	Muribaculaceae	NA	Muribaculaceae bacterium DSM 100764	MH0419	Healthy	0.0167331
MetaHit	MTG	frc	A0A377BTA6	Proteobacteria	Gammaproteobacteria	Enterobacterales	Enterobacteriaceae	Escherichia	Escherichia coli	MH0419	Healthy	0.00546387
MetaHit	MTG	frc	A1ADQ1	Proteobacteria	Gammaproteobacteria	Enterobacterales	Enterobacteriaceae	Escherichia	Escherichia coli APEC O1	MH0419	Healthy	0.00579222
MetaHit	MTG	frc	C3X762	Proteobacteria	Betaproteobacteria	Burkholderiales	Oxalobacteraceae	Oxalobacter	Oxalobacter formigenes HOxBLS	MH0419	Healthy	0.090927
MetaHit	MTG	frc	O06644	Proteobacteria	Betaproteobacteria	Burkholderiales	Oxalobacteraceae	Oxalobacter	Oxalobacter formigenes	MH0419	Healthy	0.0394088
MetaHit	MTG	frc	R5AR18	Bacteroidetes	Bacteroidia	Bacteroidales	Prevotellaceae	Prevotella	Prevotella sp. CAG:1031	MH0419	Healthy	0.0221061
MetaHit	MTG	frc	A0A087ADU5	Actinobacteria	Actinobacteria	Bifidobacteriales	Bifidobacteriaceae	Bifidobacterium	Bifidobacterium choerinum	MH0421	Healthy	0.00611603
MetaHit	MTG	frc	A0A0L7BLA3	Actinobacteria	Actinobacteria	Bifidobacteriales	Bifidobacteriaceae	Bifidobacterium	Bifidobacterium animalis subsp. animalis MCC 0483	MH0421	Healthy	0.00612984
MetaHit	MTG	frc	A0A1B1SBJ2	Bacteroidetes	Bacteroidia	Bacteroidales	Muribaculaceae	Muribaculum	Muribaculum intestinale	MH0421	Healthy	0.0622825
MetaHit	MTG	frc	A0A1I7GWQ0	Proteobacteria	Betaproteobacteria	Burkholderiales	Comamonadaceae	Polaromonas	Polaromonas sp. YR568	MH0421	Healthy	0.00641967
MetaHit	MTG	frc	A0A1Q6EIZ9	Bacteroidetes	Bacteroidia	Bacteroidales	NA	NA	Bacteroidales bacterium 52_46	MH0421	Healthy	0.0688265
MetaHit	MTG	frc	A0A1Q6U8Z5	Proteobacteria	Alphaproteobacteria	Rhodospirillales	Rhodospirillaceae	Azospirillum	Azospirillum sp. 51_20	MH0421	Healthy	0.109393
MetaHit	MTG	frc	A0A2K9Q9H1	Proteobacteria	Gammaproteobacteria	Enterobacterales	Pectobacteriaceae	Dickeya	Dickeya zeae	MH0421	Healthy	0.00638946
MetaHit	MTG	frc	A0A2V1IPP0	Bacteroidetes	Bacteroidia	Bacteroidales	Muribaculaceae	NA	Muribaculaceae bacterium DSM 103720	MH0421	Healthy	0.0124851
MetaHit	MTG	frc	A0A2V1J0Z5	Bacteroidetes	Bacteroidia	Bacteroidales	Muribaculaceae	NA	Muribaculaceae bacterium DSM 100764	MH0421	Healthy	0.144576
MetaHit	MTG	frc	A0A354HZG4	Bacteroidetes	Bacteroidia	Bacteroidales	Porphyromonadaceae	NA	Porphyromonadaceae bacterium	MH0421	Healthy	0.0504041
MetaHit	MTG	frc	A0A355Z7A2	Bacteroidetes	Bacteroidia	Bacteroidales	Porphyromonadaceae	NA	Porphyromonadaceae bacterium	MH0421	Healthy	0.0188578
MetaHit	MTG	frc	A0A377BTA6	Proteobacteria	Gammaproteobacteria	Enterobacterales	Enterobacteriaceae	Escherichia	Escherichia coli	MH0421	Healthy	0.0431035
MetaHit	MTG	frc	A1ADQ1	Proteobacteria	Gammaproteobacteria	Enterobacterales	Enterobacteriaceae	Escherichia	Escherichia coli APEC O1	MH0421	Healthy	0.0522215
MetaHit	MTG	frc	C3X762	Proteobacteria	Betaproteobacteria	Burkholderiales	Oxalobacteraceae	Oxalobacter	Oxalobacter formigenes HOxBLS	MH0421	Healthy	0.0448317
MetaHit	MTG	frc	O06644	Proteobacteria	Betaproteobacteria	Burkholderiales	Oxalobacteraceae	Oxalobacter	Oxalobacter formigenes	MH0421	Healthy	0.076136
MetaHit	MTG	frc	R5AR18	Bacteroidetes	Bacteroidia	Bacteroidales	Prevotellaceae	Prevotella	Prevotella sp. CAG:1031	MH0421	Healthy	0.0809673
MetaHit	MTG	frc	R5AXI8	Bacteroidetes	Bacteroidia	Bacteroidales	Bacteroidaceae	Bacteroides	Bacteroides sp. CAG:927	MH0421	Healthy	0.0693056
MetaHit	MTG	frc	A0A1Q6EIZ9	Bacteroidetes	Bacteroidia	Bacteroidales	NA	NA	Bacteroidales bacterium 52_46	MH0422	Healthy	0.0696787
MetaHit	MTG	frc	A0A1Q6U8Z5	Proteobacteria	Alphaproteobacteria	Rhodospirillales	Rhodospirillaceae	Azospirillum	Azospirillum sp. 51_20	MH0422	Healthy	0.788261
MetaHit	MTG	frc	A0A377BTA6	Proteobacteria	Gammaproteobacteria	Enterobacterales	Enterobacteriaceae	Escherichia	Escherichia coli	MH0422	Healthy	0.00685727
MetaHit	MTG	frc	A1ADQ1	Proteobacteria	Gammaproteobacteria	Enterobacterales	Enterobacteriaceae	Escherichia	Escherichia coli APEC O1	MH0422	Healthy	0.0145387
MetaHit	MTG	frc	C3X762	Proteobacteria	Betaproteobacteria	Burkholderiales	Oxalobacteraceae	Oxalobacter	Oxalobacter formigenes HOxBLS	MH0422	Healthy	0.0427932
MetaHit	MTG	frc	O06644	Proteobacteria	Betaproteobacteria	Burkholderiales	Oxalobacteraceae	Oxalobacter	Oxalobacter formigenes	MH0422	Healthy	0.0353277
MetaHit	MTG	frc	R5AR18	Bacteroidetes	Bacteroidia	Bacteroidales	Prevotellaceae	Prevotella	Prevotella sp. CAG:1031	MH0422	Healthy	0.249693
MetaHit	MTG	frc	A0A099YDY1	Firmicutes	Bacilli	Lactobacillales	Lactobacillaceae	Lactobacillus	Lactobacillus mucosae	MH0423	Healthy	0.0130795
MetaHit	MTG	frc	A0A1Q6U8Z5	Proteobacteria	Alphaproteobacteria	Rhodospirillales	Rhodospirillaceae	Azospirillum	Azospirillum sp. 51_20	MH0424	Healthy	0.00720419
MetaHit	MTG	frc	A0A1V8Q5N2	Actinobacteria	Actinobacteria	Bifidobacteriales	Bifidobacteriaceae	Bifidobacterium	Bifidobacterium dentium	MH0424	Healthy	0.0139457
MetaHit	MTG	frc	A0A2X5G0L0	Proteobacteria	Gammaproteobacteria	Enterobacterales	Enterobacteriaceae	Escherichia	Escherichia coli	MH0424	Healthy	0.256014
MetaHit	MTG	frc	A0A377BTA6	Proteobacteria	Gammaproteobacteria	Enterobacterales	Enterobacteriaceae	Escherichia	Escherichia coli	MH0424	Healthy	0.103407
MetaHit	MTG	frc	A1ADQ1	Proteobacteria	Gammaproteobacteria	Enterobacterales	Enterobacteriaceae	Escherichia	Escherichia coli APEC O1	MH0424	Healthy	0.672345
MetaHit	MTG	frc	B5YYX4	Proteobacteria	Gammaproteobacteria	Enterobacterales	Enterobacteriaceae	Escherichia	Escherichia coli O157:H7 str. EC4115	MH0424	Healthy	0.0438486
MetaHit	MTG	frc	A1ADQ1	Proteobacteria	Gammaproteobacteria	Enterobacterales	Enterobacteriaceae	Escherichia	Escherichia coli APEC O1	MH0425	Healthy	0.0185726
MetaHit	MTG	frc	A0A072MW66	Actinobacteria	Actinobacteria	Bifidobacteriales	Bifidobacteriaceae	Bifidobacterium	Bifidobacterium pseudocatenulatum IPLA36007	MH0426	Healthy	0.0277045
MetaHit	MTG	frc	A0A174BHB6	Actinobacteria	Actinobacteria	Bifidobacteriales	Bifidobacteriaceae	Bifidobacterium	Bifidobacterium pseudocatenulatum	MH0426	Healthy	0.00852447
MetaHit	MTG	frc	A0A1Q6EIZ9	Bacteroidetes	Bacteroidia	Bacteroidales	NA	NA	Bacteroidales bacterium 52_46	MH0426	Healthy	0.00919228
MetaHit	MTG	frc	A0A1Q6U8Z5	Proteobacteria	Alphaproteobacteria	Rhodospirillales	Rhodospirillaceae	Azospirillum	Azospirillum sp. 51_20	MH0426	Healthy	0.879192
MetaHit	MTG	frc	A0A2V1J0Z5	Bacteroidetes	Bacteroidia	Bacteroidales	Muribaculaceae	NA	Muribaculaceae bacterium DSM 100764	MH0426	Healthy	0.00923484
MetaHit	MTG	frc	A0A354HZG4	Bacteroidetes	Bacteroidia	Bacteroidales	Porphyromonadaceae	NA	Porphyromonadaceae bacterium	MH0426	Healthy	0.0185125
MetaHit	MTG	frc	A0A355Z7A2	Bacteroidetes	Bacteroidia	Bacteroidales	Porphyromonadaceae	NA	Porphyromonadaceae bacterium	MH0426	Healthy	0.00923484
MetaHit	MTG	frc	R5AR18	Bacteroidetes	Bacteroidia	Bacteroidales	Prevotellaceae	Prevotella	Prevotella sp. CAG:1031	MH0426	Healthy	0.00915011
MetaHit	MTG	frc	A0A070SKW5	Proteobacteria	Gammaproteobacteria	Enterobacterales	Enterobacteriaceae	Escherichia	Escherichia coli 2-210-07_S3_C3	MH0427	Healthy	0.00661328
MetaHit	MTG	frc	A0A0L7BLA3	Actinobacteria	Actinobacteria	Bifidobacteriales	Bifidobacteriaceae	Bifidobacterium	Bifidobacterium animalis subsp. animalis MCC 0483	MH0427	Healthy	0.00585194
MetaHit	MTG	frc	A0A1C7CW93	Proteobacteria	Gammaproteobacteria	Enterobacterales	Enterobacteriaceae	Escherichia	Escherichia coli	MH0427	Healthy	0.00620193
MetaHit	MTG	frc	A0A2X5G0L0	Proteobacteria	Gammaproteobacteria	Enterobacterales	Enterobacteriaceae	Escherichia	Escherichia coli	MH0427	Healthy	0.382039
MetaHit	MTG	frc	A0A377BTA6	Proteobacteria	Gammaproteobacteria	Enterobacterales	Enterobacteriaceae	Escherichia	Escherichia coli	MH0427	Healthy	2.73349
MetaHit	MTG	frc	A1ADQ1	Proteobacteria	Gammaproteobacteria	Enterobacterales	Enterobacteriaceae	Escherichia	Escherichia coli APEC O1	MH0427	Healthy	5.78929
MetaHit	MTG	frc	B5YYX4	Proteobacteria	Gammaproteobacteria	Enterobacterales	Enterobacteriaceae	Escherichia	Escherichia coli O157:H7 str. EC4115	MH0427	Healthy	0.311587
MetaHit	MTG	frc	A0A1B1SBJ2	Bacteroidetes	Bacteroidia	Bacteroidales	Muribaculaceae	Muribaculum	Muribaculum intestinale	MH0428	Healthy	0.0833318
MetaHit	MTG	frc	A0A1Q6EIZ9	Bacteroidetes	Bacteroidia	Bacteroidales	NA	NA	Bacteroidales bacterium 52_46	MH0428	Healthy	0.00558105
MetaHit	MTG	frc	A0A2V1IPP0	Bacteroidetes	Bacteroidia	Bacteroidales	Muribaculaceae	NA	Muribaculaceae bacterium DSM 103720	MH0428	Healthy	0.0445458
MetaHit	MTG	frc	A0A2V1J0Z5	Bacteroidetes	Bacteroidia	Bacteroidales	Muribaculaceae	NA	Muribaculaceae bacterium DSM 100764	MH0428	Healthy	0.0841034
MetaHit	MTG	frc	A0A354HZG4	Bacteroidetes	Bacteroidia	Bacteroidales	Porphyromonadaceae	NA	Porphyromonadaceae bacterium	MH0428	Healthy	0.0786786
MetaHit	MTG	frc	A0A355Z7A2	Bacteroidetes	Bacteroidia	Bacteroidales	Porphyromonadaceae	NA	Porphyromonadaceae bacterium	MH0428	Healthy	0.0672827
MetaHit	MTG	frc	C3X762	Proteobacteria	Betaproteobacteria	Burkholderiales	Oxalobacteraceae	Oxalobacter	Oxalobacter formigenes HOxBLS	MH0428	Healthy	0.0457015
MetaHit	MTG	frc	H1RYM1	Proteobacteria	Betaproteobacteria	Burkholderiales	Burkholderiaceae	Cupriavidus	Cupriavidus basilensis OR16	MH0428	Healthy	0.00288354
MetaHit	MTG	frc	O06644	Proteobacteria	Betaproteobacteria	Burkholderiales	Oxalobacteraceae	Oxalobacter	Oxalobacter formigenes	MH0428	Healthy	0.0113186
MetaHit	MTG	frc	R5AR18	Bacteroidetes	Bacteroidia	Bacteroidales	Prevotellaceae	Prevotella	Prevotella sp. CAG:1031	MH0428	Healthy	0.0333327
MetaHit	MTG	frc	R5AXI8	Bacteroidetes	Bacteroidia	Bacteroidales	Bacteroidaceae	Bacteroides	Bacteroides sp. CAG:927	MH0428	Healthy	0.0730587
MetaHit	MTG	frc	A0A1B1SBJ2	Bacteroidetes	Bacteroidia	Bacteroidales	Muribaculaceae	Muribaculum	Muribaculum intestinale	MH0429	Healthy	0.0167863
MetaHit	MTG	frc	A0A1Q6EIZ9	Bacteroidetes	Bacteroidia	Bacteroidales	NA	NA	Bacteroidales bacterium 52_46	MH0429	Healthy	0.0758864
MetaHit	MTG	frc	A0A2V1IPP0	Bacteroidetes	Bacteroidia	Bacteroidales	Muribaculaceae	NA	Muribaculaceae bacterium DSM 103720	MH0429	Healthy	0.0336498
MetaHit	MTG	frc	A0A2V1J0Z5	Bacteroidetes	Bacteroidia	Bacteroidales	Muribaculaceae	NA	Muribaculaceae bacterium DSM 100764	MH0429	Healthy	0.00847086
MetaHit	MTG	frc	A0A354HZG4	Bacteroidetes	Bacteroidia	Bacteroidales	Porphyromonadaceae	NA	Porphyromonadaceae bacterium	MH0429	Healthy	0.00849051
MetaHit	MTG	frc	A0A355Z7A2	Bacteroidetes	Bacteroidia	Bacteroidales	Porphyromonadaceae	NA	Porphyromonadaceae bacterium	MH0429	Healthy	0.0423543
MetaHit	MTG	frc	A1ADQ1	Proteobacteria	Gammaproteobacteria	Enterobacterales	Enterobacteriaceae	Escherichia	Escherichia coli APEC O1	MH0429	Healthy	0.0175933
MetaHit	MTG	frc	C3X762	Proteobacteria	Betaproteobacteria	Burkholderiales	Oxalobacteraceae	Oxalobacter	Oxalobacter formigenes HOxBLS	MH0429	Healthy	0.0172614
MetaHit	MTG	frc	H1RYM1	Proteobacteria	Betaproteobacteria	Burkholderiales	Burkholderiaceae	Cupriavidus	Cupriavidus basilensis OR16	MH0429	Healthy	0.00435644
MetaHit	MTG	frc	O06644	Proteobacteria	Betaproteobacteria	Burkholderiales	Oxalobacteraceae	Oxalobacter	Oxalobacter formigenes	MH0429	Healthy	0.0171
MetaHit	MTG	frc	R5AR18	Bacteroidetes	Bacteroidia	Bacteroidales	Prevotellaceae	Prevotella	Prevotella sp. CAG:1031	MH0429	Healthy	0.276974
MetaHit	MTG	frc	R5AXI8	Bacteroidetes	Bacteroidia	Bacteroidales	Bacteroidaceae	Bacteroides	Bacteroides sp. CAG:927	MH0429	Healthy	0.00849051
MetaHit	MTG	frc	A1ADQ1	Proteobacteria	Gammaproteobacteria	Enterobacterales	Enterobacteriaceae	Escherichia	Escherichia coli APEC O1	MH0430	Healthy	0.0546414
MetaHit	MTG	frc	C3X2D4	Proteobacteria	Betaproteobacteria	Burkholderiales	Oxalobacteraceae	Oxalobacter	Oxalobacter formigenes HOxBLS	MH0430	Healthy	0.00897742
MetaHit	MTG	frc	C3X762	Proteobacteria	Betaproteobacteria	Burkholderiales	Oxalobacteraceae	Oxalobacter	Oxalobacter formigenes HOxBLS	MH0430	Healthy	0.178701
MetaHit	MTG	frc	H1RYM1	Proteobacteria	Betaproteobacteria	Burkholderiales	Burkholderiaceae	Cupriavidus	Cupriavidus basilensis OR16	MH0430	Healthy	0.00451008
MetaHit	MTG	frc	O06644	Proteobacteria	Betaproteobacteria	Burkholderiales	Oxalobacteraceae	Oxalobacter	Oxalobacter formigenes	MH0430	Healthy	0.0885157
MetaHit	MTG	frc	A0A072MW66	Actinobacteria	Actinobacteria	Bifidobacteriales	Bifidobacteriaceae	Bifidobacterium	Bifidobacterium pseudocatenulatum IPLA36007	MH0431	Healthy	0.0128854
MetaHit	MTG	frc	A0A1Q6U8Z5	Proteobacteria	Alphaproteobacteria	Rhodospirillales	Rhodospirillaceae	Azospirillum	Azospirillum sp. 51_20	MH0431	Healthy	0.00659536
MetaHit	MTG	frc	A0A1V8Q5N2	Actinobacteria	Actinobacteria	Bifidobacteriales	Bifidobacteriaceae	Bifidobacterium	Bifidobacterium dentium	MH0431	Healthy	0.0191508
MetaHit	MTG	frc	A0A377BTA6	Proteobacteria	Gammaproteobacteria	Enterobacterales	Enterobacteriaceae	Escherichia	Escherichia coli	MH0431	Healthy	0.921436
MetaHit	MTG	frc	A1ADQ1	Proteobacteria	Gammaproteobacteria	Enterobacterales	Enterobacteriaceae	Escherichia	Escherichia coli APEC O1	MH0431	Healthy	0.374667
MetaHit	MTG	frc	C3X762	Proteobacteria	Betaproteobacteria	Burkholderiales	Oxalobacteraceae	Oxalobacter	Oxalobacter formigenes HOxBLS	MH0431	Healthy	0.111592
MetaHit	MTG	frc	H1RYM1	Proteobacteria	Betaproteobacteria	Burkholderiales	Burkholderiaceae	Cupriavidus	Cupriavidus basilensis OR16	MH0431	Healthy	0.00662677
MetaHit	MTG	frc	O06644	Proteobacteria	Betaproteobacteria	Burkholderiales	Oxalobacteraceae	Oxalobacter	Oxalobacter formigenes	MH0431	Healthy	0.123555
MetaHit	MTG	frc	A0A072MW66	Actinobacteria	Actinobacteria	Bifidobacteriales	Bifidobacteriaceae	Bifidobacterium	Bifidobacterium pseudocatenulatum IPLA36007	MH0432	Healthy	0.0307371
MetaHit	MTG	frc	A0A087ADU5	Actinobacteria	Actinobacteria	Bifidobacteriales	Bifidobacteriaceae	Bifidobacterium	Bifidobacterium choerinum	MH0432	Healthy	0.00598128
MetaHit	MTG	frc	A0A0R1UH43	Firmicutes	Bacilli	Lactobacillales	Lactobacillaceae	Lactobacillus	Lactobacillus kalixensis DSM 16043	MH0432	Healthy	0.0118558
MetaHit	MTG	frc	A0A174BHB6	Actinobacteria	Actinobacteria	Bifidobacteriales	Bifidobacteriaceae	Bifidobacterium	Bifidobacterium pseudocatenulatum	MH0432	Healthy	0.00567455
MetaHit	MTG	frc	A0A1Q6EPI6	Actinobacteria	Actinobacteria	Bifidobacteriales	Bifidobacteriaceae	Bifidobacterium	Bifidobacterium sp. 56_9_plus	MH0432	Healthy	0.00588845
MetaHit	MTG	frc	A0A087B567	Actinobacteria	Actinobacteria	Bifidobacteriales	Bifidobacteriaceae	Bifidobacterium	Bifidobacterium cuniculi	MH0433	Healthy	0.00649496
MetaHit	MTG	frc	A0A1F4JN62	Proteobacteria	Betaproteobacteria	Burkholderiales	NA	NA	Burkholderiales bacterium RIFCSPLOWO2_02_FULL_57_3	MH0433	Healthy	0.00680205
MetaHit	MTG	frc	A0A1V8Q5N2	Actinobacteria	Actinobacteria	Bifidobacteriales	Bifidobacteriaceae	Bifidobacterium	Bifidobacterium dentium	MH0433	Healthy	0.00659924
MetaHit	MTG	frc	A0A377BTA6	Proteobacteria	Gammaproteobacteria	Enterobacterales	Enterobacteriaceae	Escherichia	Escherichia coli	MH0433	Healthy	0.0456709
MetaHit	MTG	frc	A1ADQ1	Proteobacteria	Gammaproteobacteria	Enterobacterales	Enterobacteriaceae	Escherichia	Escherichia coli APEC O1	MH0433	Healthy	0.712401
MetaHit	MTG	frc	A0A072MW66	Actinobacteria	Actinobacteria	Bifidobacteriales	Bifidobacteriaceae	Bifidobacterium	Bifidobacterium pseudocatenulatum IPLA36007	MH0434	Healthy	0.0117892
MetaHit	MTG	frc	A0A085GUA8	Proteobacteria	Gammaproteobacteria	Enterobacterales	Hafniaceae	Hafnia	Hafnia alvei ATCC 13337	MH0434	Healthy	0.116305
MetaHit	MTG	frc	A0A087ADU5	Actinobacteria	Actinobacteria	Bifidobacteriales	Bifidobacteriaceae	Bifidobacterium	Bifidobacterium choerinum	MH0434	Healthy	0.00573528
MetaHit	MTG	frc	A0A087B567	Actinobacteria	Actinobacteria	Bifidobacteriales	Bifidobacteriaceae	Bifidobacterium	Bifidobacterium cuniculi	MH0434	Healthy	0.00574822
MetaHit	MTG	frc	A0A1F3ZN52	Proteobacteria	Betaproteobacteria	NA	NA	NA	Betaproteobacteria bacterium RIFCSPLOWO2_02_FULL_6	MH0434	Healthy	0.00600581
MetaHit	MTG	frc	A0A1Q6U8Z5	Proteobacteria	Alphaproteobacteria	Rhodospirillales	Rhodospirillaceae	Azospirillum	Azospirillum sp. 51_20	MH0434	Healthy	0.49481
MetaHit	MTG	frc	A0A1V8Q5N2	Actinobacteria	Actinobacteria	Bifidobacteriales	Bifidobacteriaceae	Bifidobacterium	Bifidobacterium dentium	MH0434	Healthy	0.00584051
MetaHit	MTG	frc	A0A377BTA6	Proteobacteria	Gammaproteobacteria	Enterobacterales	Enterobacteriaceae	Escherichia	Escherichia coli	MH0434	Healthy	0.167455
MetaHit	MTG	frc	A1ADQ1	Proteobacteria	Gammaproteobacteria	Enterobacterales	Enterobacteriaceae	Escherichia	Escherichia coli APEC O1	MH0434	Healthy	0.0612131
MetaHit	MTG	frc	C3X762	Proteobacteria	Betaproteobacteria	Burkholderiales	Oxalobacteraceae	Oxalobacter	Oxalobacter formigenes HOxBLS	MH0434	Healthy	0.0480465
MetaHit	MTG	frc	H1RYM1	Proteobacteria	Betaproteobacteria	Burkholderiales	Burkholderiaceae	Cupriavidus	Cupriavidus basilensis OR16	MH0434	Healthy	0.0030315
MetaHit	MTG	frc	O06644	Proteobacteria	Betaproteobacteria	Burkholderiales	Oxalobacteraceae	Oxalobacter	Oxalobacter formigenes	MH0434	Healthy	0.0118994
MetaHit	MTG	frc	A0A1F3ZN52	Proteobacteria	Betaproteobacteria	NA	NA	NA	Betaproteobacteria bacterium RIFCSPLOWO2_02_FULL_6	MH0435	Healthy	0.00548434
MetaHit	MTG	frc	A0A377BTA6	Proteobacteria	Gammaproteobacteria	Enterobacterales	Enterobacteriaceae	Escherichia	Escherichia coli	MH0435	Healthy	0.0105458
MetaHit	MTG	frc	A1ADQ1	Proteobacteria	Gammaproteobacteria	Enterobacterales	Enterobacteriaceae	Escherichia	Escherichia coli APEC O1	MH0435	Healthy	0.0335388
MetaHit	MTG	frc	C3X762	Proteobacteria	Betaproteobacteria	Burkholderiales	Oxalobacteraceae	Oxalobacter	Oxalobacter formigenes HOxBLS	MH0435	Healthy	0.0603277
MetaHit	MTG	frc	O06644	Proteobacteria	Betaproteobacteria	Burkholderiales	Oxalobacteraceae	Oxalobacter	Oxalobacter formigenes	MH0435	Healthy	0.0217323
MetaHit	MTG	frc	A0A1Q6U8Z5	Proteobacteria	Alphaproteobacteria	Rhodospirillales	Rhodospirillaceae	Azospirillum	Azospirillum sp. 51_20	MH0436	Healthy	0.0278211
MetaHit	MTG	frc	A0A2X5G0L0	Proteobacteria	Gammaproteobacteria	Enterobacterales	Enterobacteriaceae	Escherichia	Escherichia coli	MH0436	Healthy	0.0123584
MetaHit	MTG	frc	A1ADQ1	Proteobacteria	Gammaproteobacteria	Enterobacterales	Enterobacteriaceae	Escherichia	Escherichia coli APEC O1	MH0436	Healthy	0.0112889
MetaHit	MTG	frc	C3X762	Proteobacteria	Betaproteobacteria	Burkholderiales	Oxalobacteraceae	Oxalobacter	Oxalobacter formigenes HOxBLS	MH0436	Healthy	0.0886076
MetaHit	MTG	frc	H1RYM1	Proteobacteria	Betaproteobacteria	Burkholderiales	Burkholderiaceae	Cupriavidus	Cupriavidus basilensis OR16	MH0436	Healthy	0.00279536
MetaHit	MTG	frc	O06644	Proteobacteria	Betaproteobacteria	Burkholderiales	Oxalobacteraceae	Oxalobacter	Oxalobacter formigenes	MH0436	Healthy	0.0109724
MetaHit	MTG	frc	A0A0L7BLA3	Actinobacteria	Actinobacteria	Bifidobacteriales	Bifidobacteriaceae	Bifidobacterium	Bifidobacterium animalis subsp. animalis MCC 0483	MH0437	Healthy	0.0110747
MetaHit	MTG	frc	A0A1B1SBJ2	Bacteroidetes	Bacteroidia	Bacteroidales	Muribaculaceae	Muribaculum	Muribaculum intestinale	MH0437	Healthy	0.0787676
MetaHit	MTG	frc	A0A1Q6EIZ9	Bacteroidetes	Bacteroidia	Bacteroidales	NA	NA	Bacteroidales bacterium 52_46	MH0437	Healthy	0.0226087
MetaHit	MTG	frc	A0A1Q6U8Z5	Proteobacteria	Alphaproteobacteria	Rhodospirillales	Rhodospirillaceae	Azospirillum	Azospirillum sp. 51_20	MH0437	Healthy	1.15096
MetaHit	MTG	frc	A0A2V1J0Z5	Bacteroidetes	Bacteroidia	Bacteroidales	Muribaculaceae	NA	Muribaculaceae bacterium DSM 100764	MH0437	Healthy	0.10221
MetaHit	MTG	frc	A0A354HZG4	Bacteroidetes	Bacteroidia	Bacteroidales	Porphyromonadaceae	NA	Porphyromonadaceae bacterium	MH0437	Healthy	0.159363
MetaHit	MTG	frc	A0A355Z7A2	Bacteroidetes	Bacteroidia	Bacteroidales	Porphyromonadaceae	NA	Porphyromonadaceae bacterium	MH0437	Healthy	0.0454268
MetaHit	MTG	frc	C3X762	Proteobacteria	Betaproteobacteria	Burkholderiales	Oxalobacteraceae	Oxalobacter	Oxalobacter formigenes HOxBLS	MH0437	Healthy	0.323987
MetaHit	MTG	frc	H1RYM1	Proteobacteria	Betaproteobacteria	Burkholderiales	Burkholderiaceae	Cupriavidus	Cupriavidus basilensis OR16	MH0437	Healthy	0.00584059
MetaHit	MTG	frc	O06644	Proteobacteria	Betaproteobacteria	Burkholderiales	Oxalobacteraceae	Oxalobacter	Oxalobacter formigenes	MH0437	Healthy	0.068777
MetaHit	MTG	frc	R5AR18	Bacteroidetes	Bacteroidia	Bacteroidales	Prevotellaceae	Prevotella	Prevotella sp. CAG:1031	MH0437	Healthy	0.022505
MetaHit	MTG	frc	R5AXI8	Bacteroidetes	Bacteroidia	Bacteroidales	Bacteroidaceae	Bacteroides	Bacteroides sp. CAG:927	MH0437	Healthy	0.0910644
MetaHit	MTG	frc	A0A062XDE4	Firmicutes	Bacilli	Lactobacillales	Lactobacillaceae	Lactobacillus	Lactobacillus animalis	MH0438	Healthy	0.00551799
MetaHit	MTG	frc	A0A087QB11	Firmicutes	Bacilli	Lactobacillales	Lactobacillaceae	Lactobacillus	Lactobacillus gasseri SV-16A-US	MH0438	Healthy	0.00551799
MetaHit	MTG	frc	A0A1Q6U8Z5	Proteobacteria	Alphaproteobacteria	Rhodospirillales	Rhodospirillaceae	Azospirillum	Azospirillum sp. 51_20	MH0438	Healthy	0.112295
MetaHit	MTG	frc	A0A377BTA6	Proteobacteria	Gammaproteobacteria	Enterobacterales	Enterobacteriaceae	Escherichia	Escherichia coli	MH0438	Healthy	0.0169669
MetaHit	MTG	frc	A1ADQ1	Proteobacteria	Gammaproteobacteria	Enterobacterales	Enterobacteriaceae	Escherichia	Escherichia coli APEC O1	MH0438	Healthy	0.00599551
MetaHit	MTG	frc	C3X762	Proteobacteria	Betaproteobacteria	Burkholderiales	Oxalobacteraceae	Oxalobacter	Oxalobacter formigenes HOxBLS	MH0438	Healthy	0.0647062
MetaHit	MTG	frc	H1RYM1	Proteobacteria	Betaproteobacteria	Burkholderiales	Burkholderiaceae	Cupriavidus	Cupriavidus basilensis OR16	MH0438	Healthy	0.0029692
MetaHit	MTG	frc	O06644	Proteobacteria	Betaproteobacteria	Burkholderiales	Oxalobacteraceae	Oxalobacter	Oxalobacter formigenes	MH0438	Healthy	0.0116548
MetaHit	MTG	frc	A0A1Q6U8Z5	Proteobacteria	Alphaproteobacteria	Rhodospirillales	Rhodospirillaceae	Azospirillum	Azospirillum sp. 51_20	MH0439	Healthy	0.427153
MetaHit	MTG	frc	C3X762	Proteobacteria	Betaproteobacteria	Burkholderiales	Oxalobacteraceae	Oxalobacter	Oxalobacter formigenes HOxBLS	MH0439	Healthy	0.0919218
MetaHit	MTG	frc	H1RYM1	Proteobacteria	Betaproteobacteria	Burkholderiales	Burkholderiaceae	Cupriavidus	Cupriavidus basilensis OR16	MH0439	Healthy	0.00289991
MetaHit	MTG	frc	O06644	Proteobacteria	Betaproteobacteria	Burkholderiales	Oxalobacteraceae	Oxalobacter	Oxalobacter formigenes	MH0439	Healthy	0.0341485
MetaHit	MTG	frc	A0A072MW66	Actinobacteria	Actinobacteria	Bifidobacteriales	Bifidobacteriaceae	Bifidobacterium	Bifidobacterium pseudocatenulatum IPLA36007	MH0440	Healthy	1.07714
MetaHit	MTG	frc	A0A087ADU5	Actinobacteria	Actinobacteria	Bifidobacteriales	Bifidobacteriaceae	Bifidobacterium	Bifidobacterium choerinum	MH0440	Healthy	0.00560444
MetaHit	MTG	frc	A0A174BHB6	Actinobacteria	Actinobacteria	Bifidobacteriales	Bifidobacteriaceae	Bifidobacterium	Bifidobacterium pseudocatenulatum	MH0440	Healthy	0.0584874
MetaHit	MTG	frc	A0A1F4IAS5	Proteobacteria	Betaproteobacteria	Burkholderiales	NA	NA	Burkholderiales bacterium RIFCSPHIGHO2_12_FULL_61_	MH0440	Healthy	0.0059247
MetaHit	MTG	frc	A0A1I7GWQ0	Proteobacteria	Betaproteobacteria	Burkholderiales	Comamonadaceae	Polaromonas	Polaromonas sp. YR568	MH0440	Healthy	0.00588268
MetaHit	MTG	frc	A0A1Q6EPI6	Actinobacteria	Actinobacteria	Bifidobacteriales	Bifidobacteriaceae	Bifidobacterium	Bifidobacterium sp. 56_9_plus	MH0440	Healthy	0.0551746
MetaHit	MTG	frc	A0A1V8Q5N2	Actinobacteria	Actinobacteria	Bifidobacteriales	Bifidobacteriaceae	Bifidobacterium	Bifidobacterium dentium	MH0440	Healthy	0.0456582
MetaHit	MTG	frc	A0A377BTA6	Proteobacteria	Gammaproteobacteria	Enterobacterales	Enterobacteriaceae	Escherichia	Escherichia coli	MH0440	Healthy	0.214418
MetaHit	MTG	frc	A1ADQ1	Proteobacteria	Gammaproteobacteria	Enterobacterales	Enterobacteriaceae	Escherichia	Escherichia coli APEC O1	MH0440	Healthy	0.10767
MetaHit	MTG	frc	B5YYX4	Proteobacteria	Gammaproteobacteria	Enterobacterales	Enterobacteriaceae	Escherichia	Escherichia coli O157:H7 str. EC4115	MH0440	Healthy	0.0119633
MetaHit	MTG	frc	C3X762	Proteobacteria	Betaproteobacteria	Burkholderiales	Oxalobacteraceae	Oxalobacter	Oxalobacter formigenes HOxBLS	MH0440	Healthy	0.211277
MetaHit	MTG	frc	O06644	Proteobacteria	Betaproteobacteria	Burkholderiales	Oxalobacteraceae	Oxalobacter	Oxalobacter formigenes	MH0440	Healthy	0.110465
MetaHit	MTG	frc	A0A087ADU5	Actinobacteria	Actinobacteria	Bifidobacteriales	Bifidobacteriaceae	Bifidobacterium	Bifidobacterium choerinum	MH0441	Healthy	0.00606432
MetaHit	MTG	frc	A0A1Q6U8Z5	Proteobacteria	Alphaproteobacteria	Rhodospirillales	Rhodospirillaceae	Azospirillum	Azospirillum sp. 51_20	MH0441	Healthy	0.00638047
MetaHit	MTG	frc	C3X762	Proteobacteria	Betaproteobacteria	Burkholderiales	Oxalobacteraceae	Oxalobacter	Oxalobacter formigenes HOxBLS	MH0441	Healthy	0.0317519
MetaHit	MTG	frc	H1RYM1	Proteobacteria	Betaproteobacteria	Burkholderiales	Burkholderiaceae	Cupriavidus	Cupriavidus basilensis OR16	MH0441	Healthy	0.00320543
MetaHit	MTG	frc	O06644	Proteobacteria	Betaproteobacteria	Burkholderiales	Oxalobacteraceae	Oxalobacter	Oxalobacter formigenes	MH0441	Healthy	0.00629102
MetaHit	MTG	frc	A0A1B1SBJ2	Bacteroidetes	Bacteroidia	Bacteroidales	Muribaculaceae	Muribaculum	Muribaculum intestinale	MH0442	Healthy	0.00544138
MetaHit	MTG	frc	A0A1F4IAS5	Proteobacteria	Betaproteobacteria	Burkholderiales	NA	NA	Burkholderiales bacterium RIFCSPHIGHO2_12_FULL_61_	MH0442	Healthy	0.00564867
MetaHit	MTG	frc	A0A1Q6EIZ9	Bacteroidetes	Bacteroidia	Bacteroidales	NA	NA	Bacteroidales bacterium 52_46	MH0442	Healthy	0.0109329
MetaHit	MTG	frc	A0A2A2YVB9	Actinobacteria	Actinobacteria	Streptomycetales	Streptomycetaceae	Streptomyces	Streptomyces sp. SA15	MH0442	Healthy	0.0056757
MetaHit	MTG	frc	A0A354HZG4	Bacteroidetes	Bacteroidia	Bacteroidales	Porphyromonadaceae	NA	Porphyromonadaceae bacterium	MH0442	Healthy	0.0055045
MetaHit	MTG	frc	A0A355Z7A2	Bacteroidetes	Bacteroidia	Bacteroidales	Porphyromonadaceae	NA	Porphyromonadaceae bacterium	MH0442	Healthy	0.00549176
MetaHit	MTG	frc	C3X2D4	Proteobacteria	Betaproteobacteria	Burkholderiales	Oxalobacteraceae	Oxalobacter	Oxalobacter formigenes HOxBLS	MH0442	Healthy	0.0056219
MetaHit	MTG	frc	C3X762	Proteobacteria	Betaproteobacteria	Burkholderiales	Oxalobacteraceae	Oxalobacter	Oxalobacter formigenes HOxBLS	MH0442	Healthy	0.162266
MetaHit	MTG	frc	H1RYM1	Proteobacteria	Betaproteobacteria	Burkholderiales	Burkholderiaceae	Cupriavidus	Cupriavidus basilensis OR16	MH0442	Healthy	0.00282434
MetaHit	MTG	frc	O06644	Proteobacteria	Betaproteobacteria	Burkholderiales	Oxalobacteraceae	Oxalobacter	Oxalobacter formigenes	MH0442	Healthy	0.0388016
MetaHit	MTG	frc	R5AXI8	Bacteroidetes	Bacteroidia	Bacteroidales	Bacteroidaceae	Bacteroides	Bacteroides sp. CAG:927	MH0442	Healthy	0.011009
MetaHit	MTG	frc	C3X762	Proteobacteria	Betaproteobacteria	Burkholderiales	Oxalobacteraceae	Oxalobacter	Oxalobacter formigenes HOxBLS	MH0443	Healthy	0.0244209
MetaHit	MTG	frc	O06644	Proteobacteria	Betaproteobacteria	Burkholderiales	Oxalobacteraceae	Oxalobacter	Oxalobacter formigenes	MH0443	Healthy	0.0120963
MetaHit	MTG	frc	A1ADQ1	Proteobacteria	Gammaproteobacteria	Enterobacterales	Enterobacteriaceae	Escherichia	Escherichia coli APEC O1	MH0444	Healthy	0.842847
MetaHit	MTG	frc	A0A072MW66	Actinobacteria	Actinobacteria	Bifidobacteriales	Bifidobacteriaceae	Bifidobacterium	Bifidobacterium pseudocatenulatum IPLA36007	MH0445	Healthy	0.364226
MetaHit	MTG	frc	A0A174BHB6	Actinobacteria	Actinobacteria	Bifidobacteriales	Bifidobacteriaceae	Bifidobacterium	Bifidobacterium pseudocatenulatum	MH0445	Healthy	0.0353903
MetaHit	MTG	frc	A0A1Q6EPI6	Actinobacteria	Actinobacteria	Bifidobacteriales	Bifidobacteriaceae	Bifidobacterium	Bifidobacterium sp. 56_9_plus	MH0445	Healthy	0.0122414
MetaHit	MTG	frc	A1ADQ1	Proteobacteria	Gammaproteobacteria	Enterobacterales	Enterobacteriaceae	Escherichia	Escherichia coli APEC O1	MH0445	Healthy	0.00663569
MetaHit	MTG	frc	A0A1F4IAS5	Proteobacteria	Betaproteobacteria	Burkholderiales	NA	NA	Burkholderiales bacterium RIFCSPHIGHO2_12_FULL_61_	MH0446	Healthy	0.0104328
MetaHit	MTG	frc	A0A1Q6EIZ9	Bacteroidetes	Bacteroidia	Bacteroidales	NA	NA	Bacteroidales bacterium 52_46	MH0446	Healthy	0.0201925
MetaHit	MTG	frc	C3X762	Proteobacteria	Betaproteobacteria	Burkholderiales	Oxalobacteraceae	Oxalobacter	Oxalobacter formigenes HOxBLS	MH0446	Healthy	0.0878423
MetaHit	MTG	frc	O06644	Proteobacteria	Betaproteobacteria	Burkholderiales	Oxalobacteraceae	Oxalobacter	Oxalobacter formigenes	MH0446	Healthy	0.051189
MetaHit	MTG	frc	A0A1F4IAS5	Proteobacteria	Betaproteobacteria	Burkholderiales	NA	NA	Burkholderiales bacterium RIFCSPHIGHO2_12_FULL_61_	MH0447	Healthy	0.00541446
MetaHit	MTG	frc	A0A354HZG4	Bacteroidetes	Bacteroidia	Bacteroidales	Porphyromonadaceae	NA	Porphyromonadaceae bacterium	MH0447	Healthy	0.0105526
MetaHit	MTG	frc	C3X762	Proteobacteria	Betaproteobacteria	Burkholderiales	Oxalobacteraceae	Oxalobacter	Oxalobacter formigenes HOxBLS	MH0447	Healthy	0.155538
MetaHit	MTG	frc	O06644	Proteobacteria	Betaproteobacteria	Burkholderiales	Oxalobacteraceae	Oxalobacter	Oxalobacter formigenes	MH0447	Healthy	0.0425061
MetaHit	MTG	frc	R5AXI8	Bacteroidetes	Bacteroidia	Bacteroidales	Bacteroidaceae	Bacteroides	Bacteroides sp. CAG:927	MH0447	Healthy	0.00527628
MetaHit	MTG	frc	A0A072MW66	Actinobacteria	Actinobacteria	Bifidobacteriales	Bifidobacteriaceae	Bifidobacterium	Bifidobacterium pseudocatenulatum IPLA36007	MH0448	Healthy	0.0310219
MetaHit	MTG	frc	A0A087B567	Actinobacteria	Actinobacteria	Bifidobacteriales	Bifidobacteriaceae	Bifidobacterium	Bifidobacterium cuniculi	MH0448	Healthy	0.00605032
MetaHit	MTG	frc	A0A1B1SBJ2	Bacteroidetes	Bacteroidia	Bacteroidales	Muribaculaceae	Muribaculum	Muribaculum intestinale	MH0448	Healthy	0.00614746
MetaHit	MTG	frc	A0A1Q6EIZ9	Bacteroidetes	Bacteroidia	Bacteroidales	NA	NA	Bacteroidales bacterium 52_46	MH0448	Healthy	0.00617579
MetaHit	MTG	frc	A0A1Q6U8Z5	Proteobacteria	Alphaproteobacteria	Rhodospirillales	Rhodospirillaceae	Azospirillum	Azospirillum sp. 51_20	MH0448	Healthy	0.107974
MetaHit	MTG	frc	A0A1V8Q5N2	Actinobacteria	Actinobacteria	Bifidobacteriales	Bifidobacteriaceae	Bifidobacterium	Bifidobacterium dentium	MH0448	Healthy	0.0122949
MetaHit	MTG	frc	A0A2A2YVB9	Actinobacteria	Actinobacteria	Streptomycetales	Streptomycetaceae	Streptomyces	Streptomyces sp. SA15	MH0448	Healthy	0.00641218
MetaHit	MTG	frc	A0A2V1IPP0	Bacteroidetes	Bacteroidia	Bacteroidales	Muribaculaceae	NA	Muribaculaceae bacterium DSM 103720	MH0448	Healthy	0.0123232
MetaHit	MTG	frc	A0A355Z7A2	Bacteroidetes	Bacteroidia	Bacteroidales	Porphyromonadaceae	NA	Porphyromonadaceae bacterium	MH0448	Healthy	0.0124088
MetaHit	MTG	frc	A0A369DPH8	Proteobacteria	Gammaproteobacteria	Enterobacterales	Enterobacteriaceae	Escherichia	Escherichia coli	MH0448	Healthy	0.00644301
MetaHit	MTG	frc	A0A377BTA6	Proteobacteria	Gammaproteobacteria	Enterobacterales	Enterobacteriaceae	Escherichia	Escherichia coli	MH0448	Healthy	0.145866
MetaHit	MTG	frc	A1ADQ1	Proteobacteria	Gammaproteobacteria	Enterobacterales	Enterobacteriaceae	Escherichia	Escherichia coli APEC O1	MH0448	Healthy	0.283492
MetaHit	MTG	frc	B5YYX4	Proteobacteria	Gammaproteobacteria	Enterobacterales	Enterobacteriaceae	Escherichia	Escherichia coli O157:H7 str. EC4115	MH0448	Healthy	0.032215
MetaHit	MTG	frc	C3X762	Proteobacteria	Betaproteobacteria	Burkholderiales	Oxalobacteraceae	Oxalobacter	Oxalobacter formigenes HOxBLS	MH0448	Healthy	0.170679
MetaHit	MTG	frc	O06644	Proteobacteria	Betaproteobacteria	Burkholderiales	Oxalobacteraceae	Oxalobacter	Oxalobacter formigenes	MH0448	Healthy	0.0814107
MetaHit	MTG	frc	R5AXI8	Bacteroidetes	Bacteroidia	Bacteroidales	Bacteroidaceae	Bacteroides	Bacteroides sp. CAG:927	MH0448	Healthy	0.00621877
MetaHit	MTG	frc	A0A377BTA6	Proteobacteria	Gammaproteobacteria	Enterobacterales	Enterobacteriaceae	Escherichia	Escherichia coli	MH0450	Healthy	0.220266
MetaHit	MTG	frc	A1ADQ1	Proteobacteria	Gammaproteobacteria	Enterobacterales	Enterobacteriaceae	Escherichia	Escherichia coli APEC O1	MH0450	Healthy	0.328166
MetaHit	MTG	frc	A0A1Q6U8Z5	Proteobacteria	Alphaproteobacteria	Rhodospirillales	Rhodospirillaceae	Azospirillum	Azospirillum sp. 51_20	MH0452	Healthy	0.957114
MetaHit	MTG	frc	A0A377BTA6	Proteobacteria	Gammaproteobacteria	Enterobacterales	Enterobacteriaceae	Escherichia	Escherichia coli	MH0452	Healthy	0.0157008
MetaHit	MTG	frc	A1ADQ1	Proteobacteria	Gammaproteobacteria	Enterobacterales	Enterobacteriaceae	Escherichia	Escherichia coli APEC O1	MH0452	Healthy	0.0277405
MetaHit	MTG	frc	C3X762	Proteobacteria	Betaproteobacteria	Burkholderiales	Oxalobacteraceae	Oxalobacter	Oxalobacter formigenes HOxBLS	MH0452	Healthy	0.0163303
MetaHit	MTG	frc	H1RYM1	Proteobacteria	Betaproteobacteria	Burkholderiales	Burkholderiaceae	Cupriavidus	Cupriavidus basilensis OR16	MH0452	Healthy	0.0082429
MetaHit	MTG	frc	O06644	Proteobacteria	Betaproteobacteria	Burkholderiales	Oxalobacteraceae	Oxalobacter	Oxalobacter formigenes	MH0452	Healthy	0.0107851
MetaHit	MTG	frc	A0A377BTA6	Proteobacteria	Gammaproteobacteria	Enterobacterales	Enterobacteriaceae	Escherichia	Escherichia coli	MH0453	Healthy	0.0124613
MetaHit	MTG	frc	A0A1F3ZN52	Proteobacteria	Betaproteobacteria	NA	NA	NA	Betaproteobacteria bacterium RIFCSPLOWO2_02_FULL_6	MH0454	Healthy	0.0128397
MetaHit	MTG	frc	A0A377BTA6	Proteobacteria	Gammaproteobacteria	Enterobacterales	Enterobacteriaceae	Escherichia	Escherichia coli	MH0454	Healthy	0.0123447
MetaHit	MTG	frc	A1ADQ1	Proteobacteria	Gammaproteobacteria	Enterobacterales	Enterobacteriaceae	Escherichia	Escherichia coli APEC O1	MH0454	Healthy	0.0065433
MetaHit	MTG	frc	C3X2D4	Proteobacteria	Betaproteobacteria	Burkholderiales	Oxalobacteraceae	Oxalobacter	Oxalobacter formigenes HOxBLS	MH0454	Healthy	0.148356
MetaHit	MTG	frc	C3X762	Proteobacteria	Betaproteobacteria	Burkholderiales	Oxalobacteraceae	Oxalobacter	Oxalobacter formigenes HOxBLS	MH0454	Healthy	0.365931
MetaHit	MTG	frc	H1RYM1	Proteobacteria	Betaproteobacteria	Burkholderiales	Burkholderiaceae	Cupriavidus	Cupriavidus basilensis OR16	MH0454	Healthy	0.00324049
MetaHit	MTG	frc	O06644	Proteobacteria	Betaproteobacteria	Burkholderiales	Oxalobacteraceae	Oxalobacter	Oxalobacter formigenes	MH0454	Healthy	0.0127197
MetaHit	MTG	frc	A0A377BTA6	Proteobacteria	Gammaproteobacteria	Enterobacterales	Enterobacteriaceae	Escherichia	Escherichia coli	MH0455	Healthy	0.0109351
MetaHit	MTG	frc	A0A072MW66	Actinobacteria	Actinobacteria	Bifidobacteriales	Bifidobacteriaceae	Bifidobacterium	Bifidobacterium pseudocatenulatum IPLA36007	MH0456	Healthy	0.0311254
MetaHit	MTG	frc	A0A2X5G0L0	Proteobacteria	Gammaproteobacteria	Enterobacterales	Enterobacteriaceae	Escherichia	Escherichia coli	MH0456	Healthy	0.134462
MetaHit	MTG	frc	A0A369G9R5	Proteobacteria	Gammaproteobacteria	Enterobacterales	Enterobacteriaceae	Escherichia	Escherichia coli	MH0456	Healthy	0.00646451
MetaHit	MTG	frc	A0A377BTA6	Proteobacteria	Gammaproteobacteria	Enterobacterales	Enterobacteriaceae	Escherichia	Escherichia coli	MH0456	Healthy	1.866
MetaHit	MTG	frc	A1ADQ1	Proteobacteria	Gammaproteobacteria	Enterobacterales	Enterobacteriaceae	Escherichia	Escherichia coli APEC O1	MH0456	Healthy	2.37248
MetaHit	MTG	frc	A0A0D4CLJ2	Firmicutes	Bacilli	Lactobacillales	Lactobacillaceae	Lactobacillus	Lactobacillus mucosae LM1	MH0457	Healthy	0.00568459
MetaHit	MTG	frc	A0A0R1VB05	Firmicutes	Bacilli	Lactobacillales	Lactobacillaceae	Lactobacillus	Lactobacillus gastricus DSM 16045	MH0457	Healthy	0.00567187
MetaHit	MTG	frc	A0A1Q6U8Z5	Proteobacteria	Alphaproteobacteria	Rhodospirillales	Rhodospirillaceae	Azospirillum	Azospirillum sp. 51_20	MH0457	Healthy	0.216284
MetaHit	MTG	frc	A1ADQ1	Proteobacteria	Gammaproteobacteria	Enterobacterales	Enterobacteriaceae	Escherichia	Escherichia coli APEC O1	MH0457	Healthy	0.0121891
MetaHit	MTG	frc	C3X762	Proteobacteria	Betaproteobacteria	Burkholderiales	Oxalobacteraceae	Oxalobacter	Oxalobacter formigenes HOxBLS	MH0457	Healthy	0.143509
MetaHit	MTG	frc	H1RYM1	Proteobacteria	Betaproteobacteria	Burkholderiales	Burkholderiaceae	Cupriavidus	Cupriavidus basilensis OR16	MH0457	Healthy	0.00301825
MetaHit	MTG	frc	O06644	Proteobacteria	Betaproteobacteria	Burkholderiales	Oxalobacteraceae	Oxalobacter	Oxalobacter formigenes	MH0457	Healthy	0.118473
MetaHit	MTG	frc	A0A072MW66	Actinobacteria	Actinobacteria	Bifidobacteriales	Bifidobacteriaceae	Bifidobacterium	Bifidobacterium pseudocatenulatum IPLA36007	MH0458	Healthy	0.0184572
MetaHit	MTG	frc	A0A1Q6EIZ9	Bacteroidetes	Bacteroidia	Bacteroidales	NA	NA	Bacteroidales bacterium 52_46	MH0458	Healthy	0.0367443
MetaHit	MTG	frc	A0A2N3QI38	Actinobacteria	Actinobacteria	Bifidobacteriales	Bifidobacteriaceae	Bifidobacterium	Bifidobacterium pseudolongum subsp. globosum	MH0458	Healthy	0.00599964
MetaHit	MTG	frc	A0A2V1IPP0	Bacteroidetes	Bacteroidia	Bacteroidales	Muribaculaceae	NA	Muribaculaceae bacterium DSM 103720	MH0458	Healthy	0.0672098
MetaHit	MTG	frc	A0A2V1J0Z5	Bacteroidetes	Bacteroidia	Bacteroidales	Muribaculaceae	NA	Muribaculaceae bacterium DSM 100764	MH0458	Healthy	0.0430669
MetaHit	MTG	frc	A0A355Z7A2	Bacteroidetes	Bacteroidia	Bacteroidales	Porphyromonadaceae	NA	Porphyromonadaceae bacterium	MH0458	Healthy	0.713679
MetaHit	MTG	frc	R9KTQ7	Actinobacteria	Coriobacteriia	Eggerthellales	Eggerthellaceae	Enterorhabdus	Enterorhabdus caecimuris B7	MH0458	Healthy	0.0642555
MetaHit	MTG	frc	A0A1F4IAS5	Proteobacteria	Betaproteobacteria	Burkholderiales	NA	NA	Burkholderiales bacterium RIFCSPHIGHO2_12_FULL_61_	MH0462	Healthy	0.00531955
MetaHit	MTG	frc	C3X762	Proteobacteria	Betaproteobacteria	Burkholderiales	Oxalobacteraceae	Oxalobacter	Oxalobacter formigenes HOxBLS	MH0462	Healthy	0.0895792
MetaHit	MTG	frc	H1RYM1	Proteobacteria	Betaproteobacteria	Burkholderiales	Burkholderiaceae	Cupriavidus	Cupriavidus basilensis OR16	MH0462	Healthy	0.00265977
MetaHit	MTG	frc	O06644	Proteobacteria	Betaproteobacteria	Burkholderiales	Oxalobacteraceae	Oxalobacter	Oxalobacter formigenes	MH0462	Healthy	0.0522012
US_men_extra	MTG	frc	A0A016XI66	Proteobacteria	Betaproteobacteria	Burkholderiales	Comamonadaceae	Hylemonella	Hylemonella gracilis str. Niagara R	10042055	Healthy	0.111699
US_men_extra	MTG	frc	A0A028EDB1	Proteobacteria	Gammaproteobacteria	Enterobacterales	Enterobacteriaceae	Escherichia	Escherichia coli O118:H16 str. 2009C-4446	10042055	Healthy	0.134417
US_men_extra	MTG	frc	A0A0Q6WEP6	Proteobacteria	Betaproteobacteria	Burkholderiales	Oxalobacteraceae	Massilia	Massilia sp. Root351	10042055	Healthy	0.0890956
US_men_extra	MTG	frc	A0A1C7CW93	Proteobacteria	Gammaproteobacteria	Enterobacterales	Enterobacteriaceae	Escherichia	Escherichia coli	10042055	Healthy	0.104339
US_men_extra	MTG	frc	A0A2S2DF99	Proteobacteria	Betaproteobacteria	Burkholderiales	Oxalobacteraceae	Massilia	Massilia oculi	10042055	Healthy	0.089525
US_men_extra	MTG	frc	A0A377BTA6	Proteobacteria	Gammaproteobacteria	Enterobacterales	Enterobacteriaceae	Escherichia	Escherichia coli	10042055	Healthy	0.191231
US_men_extra	MTG	frc	A1ADQ1	Proteobacteria	Gammaproteobacteria	Enterobacterales	Enterobacteriaceae	Escherichia	Escherichia coli APEC O1	10042055	Healthy	25.6939
US_men_extra	MTG	frc	B5YYX4	Proteobacteria	Gammaproteobacteria	Enterobacterales	Enterobacteriaceae	Escherichia	Escherichia coli O157:H7 str. EC4115	10042055	Healthy	1.62503
US_men_extra	MTG	frc	C3X762	Proteobacteria	Betaproteobacteria	Burkholderiales	Oxalobacteraceae	Oxalobacter	Oxalobacter formigenes HOxBLS	10042055	Healthy	0.449684
US_men_extra	MTG	frc	O06644	Proteobacteria	Betaproteobacteria	Burkholderiales	Oxalobacteraceae	Oxalobacter	Oxalobacter formigenes	10042055	Healthy	0.189283
US_men_extra	MTG	frc	Q8FFE8	Proteobacteria	Gammaproteobacteria	Enterobacterales	Enterobacteriaceae	Escherichia	Escherichia coli CFT073	10042055	Healthy	0.0916663
US_men_extra	MTS	frc	A0A1F3ZN52	Proteobacteria	Betaproteobacteria	NA	NA	NA	Betaproteobacteria bacterium RIFCSPLOWO2_02_FULL_6	10042055	Healthy	0.0725194
US_men_extra	MTS	frc	C3X2D4	Proteobacteria	Betaproteobacteria	Burkholderiales	Oxalobacteraceae	Oxalobacter	Oxalobacter formigenes HOxBLS	10042055	Healthy	2.89312
US_men_extra	MTS	frc	C3X762	Proteobacteria	Betaproteobacteria	Burkholderiales	Oxalobacteraceae	Oxalobacter	Oxalobacter formigenes HOxBLS	10042055	Healthy	19.808
US_men_extra	MTS	frc	O06644	Proteobacteria	Betaproteobacteria	Burkholderiales	Oxalobacteraceae	Oxalobacter	Oxalobacter formigenes	10042055	Healthy	7.11338
US_men_extra	MTG	frc	A0A072MW66	Actinobacteria	Actinobacteria	Bifidobacteriales	Bifidobacteriaceae	Bifidobacterium	Bifidobacterium pseudocatenulatum IPLA36007	10057608	Healthy	12.2312
US_men_extra	MTG	frc	A0A087ADU5	Actinobacteria	Actinobacteria	Bifidobacteriales	Bifidobacteriaceae	Bifidobacterium	Bifidobacterium choerinum	10057608	Healthy	2.07195
US_men_extra	MTG	frc	A0A087B567	Actinobacteria	Actinobacteria	Bifidobacteriales	Bifidobacteriaceae	Bifidobacterium	Bifidobacterium cuniculi	10057608	Healthy	0.519157
US_men_extra	MTG	frc	A0A0A7I974	Actinobacteria	Actinobacteria	Bifidobacteriales	Bifidobacteriaceae	Bifidobacterium	Bifidobacterium pseudolongum PV8-2	10057608	Healthy	0.310792
US_men_extra	MTG	frc	A0A0L7BLA3	Actinobacteria	Actinobacteria	Bifidobacteriales	Bifidobacteriaceae	Bifidobacterium	Bifidobacterium animalis subsp. animalis MCC 0483	10057608	Healthy	0.415325
US_men_extra	MTG	frc	A0A174BHB6	Actinobacteria	Actinobacteria	Bifidobacteriales	Bifidobacteriaceae	Bifidobacterium	Bifidobacterium pseudocatenulatum	10057608	Healthy	1.33181
[truncated: 5,439 more rows]
