# Supplementary material for: Microbial genetic and transcriptional contributions to oxalate degradation by the gut microbiota in health and disease
Source: eLife. 2021 Mar 26;10:e63642. doi: 10.7554/eLife.63642 (PMC8062136; doi:10.7554/eLife.63642)
Supplement: Figure 4—source data 1. [file elife-63642-fig4-data1.xlsx]

## Sheet: related to panel A
oxalate	oxalate_rel	total_metabolite	accession	subject	Project	External.ID	Participant.ID	site_sub_coll	date_of_receipt	visit_num	Research.Project	diagnosis	baseline_montreal_location
71045973	0.00152439	46606305007	HSM5FZBJ	H4001	H4001C1_MBX	HSM5FZBJ	H4001	H4001C1	2014-03-12	4	ibdmdb	CD	L3+L4
9878130	0.000318609	31003911470	MSM5FZ9X	M2014	M2014C3_MBX	MSM5FZ9X	M2014	M2014C3	2014-03-14	6	ibdmdb	CD	L1
7799192	0.000169598	45986376235	CSM5FZ3N	C3001	C3001C1_MBX	CSM5FZ3N	C3001	C3001C1	2014-03-14	4	ibdmdb	CD	L3
83510200	0.00221587	37687241210	ESM5MEDZ	E5001	E5001C1_MBX	ESM5MEDZ	E5001	E5001C1	2014-03-26	4	ibdmdb	CD	L3+L4
6353380	0.000204922	31003911470	MSM5FZA2	M2014	M2014C5_MBX	MSM5FZA2	M2014	M2014C5	2014-04-08	8	ibdmdb	CD	L1
1305070	2.49e-05	52320204001	MSM5LLHZ	M2008	M2008C9_MBX	MSM5LLHZ	M2008	M2008C9	2014-04-10	13	ibdmdb	CD
15204941	0.000326242	46606305007	HSM5FZBQ	H4001	H4001C4_MBX	HSM5FZBQ	H4001	H4001C4	2014-04-22	7	ibdmdb	CD	L3+L4
11608662	0.000328883	35297263134	MSM5LLIC	M2025	M2025C1_MBX	MSM5LLIC	M2025	M2025C1	2014-04-22	4	ibdmdb	CD	L2
3798122	1.25e-05	302684000000	MSM5LLIG	M2021	M2021C3_MBX	MSM5LLIG	M2021	M2021C3	2014-04-24	6	ibdmdb	CD	L2
14305943	0.000233978	61142215369	CSM5FZ3T	C3002	C3002C1_MBX	CSM5FZ3T	C3002	C3002C1	2014-04-29	4	ibdmdb	CD	L3
5973961	0.000234984	25422808215	MSM5LLFG	M2028	M2028C1_MBX	MSM5LLFG	M2028	M2028C1	2014-04-29	4	ibdmdb	CD	L1
7873388	0.000116124	67801650352	MSM5LLFK	M2026	M2026C2_MBX	MSM5LLFK	M2026	M2026C2	2014-04-30	5	ibdmdb	UC
418034846	0.0111443	37511057724	ESM5MEEG	E5004	E5004C1_MBX	ESM5MEEG	E5004	E5004C1	2014-05-01	4	ibdmdb	UC
16457537	0.000447759	36755341549	MSM5LLIS	M2027	M2027C1_MBX	MSM5LLIS	M2027	M2027C1	2014-05-02	4	ibdmdb	CD	L1
7231020	0.00019129	37801352290	CSM5FZ48	C3003	C3003C1_MBX	CSM5FZ48	C3003	C3003C1	2014-05-08	4	ibdmdb	UC
17195086	0.000373917	45986376235	CSM5FZ4C	C3001	C3001C5_MBX	CSM5FZ4C	C3001	C3001C5	2014-05-09	8	ibdmdb	CD	L3
3899945	0.000136652	28539230717	CSM5FZ4A	C3004	C3004C1_MBX	CSM5FZ4A	C3004	C3004C1	2014-05-13	4	ibdmdb	UC
1398652	2.89e-05	48453649373	HSM5MD4S	H4004	H4004C1_MBX	HSM5MD4S	H4004	H4004C1	2014-05-20	4	ibdmdb	CD	L3
12473567	0.000239274	52130815480	CSM5FZ4O	C3005	C3005C1_MBX	CSM5FZ4O	C3005	C3005C1	2014-05-21	4	ibdmdb	UC
1540455	5.09e-06	302684000000	MSM5LLIK	M2021	M2021C5_MBX	MSM5LLIK	M2021	M2021C5	2014-05-21	8	ibdmdb	CD	L2
2418510	4.62e-05	52320204001	MSM5LLDS	M2008	M2008C6_MBX	MSM5LLDS	M2008	M2008C6	2014-02-19	9	ibdmdb	CD
121992968	0.00191883	63576793892	CSM5MCTZ	C3006	C3006C1_MBX	CSM5MCTZ	C3006	C3006C1	2014-05-29	4	ibdmdb	UC
9365447	0.00013813	67801650352	MSM5LLFO	M2026	M2026C4_MBX	MSM5LLFO	M2026	M2026C4	2014-05-30	7	ibdmdb	UC
62068571	0.00126357	49121716791	HSM5MD86	H4006	H4006C1_MBX	HSM5MD86	H4006	H4006C1	2014-06-02	4	ibdmdb	CD	L2+L4
25691682	0.000551249	46606305007	HSM5MD7W	H4001	H4001C7_MBX	HSM5MD7W	H4001	H4001C7	2014-06-03	11	ibdmdb	CD	L3+L4
19008907	0.000504386	37687241210	ESM5MEEB	E5001	E5001C6_MBX	ESM5MEEB	E5001	E5001C6	2014-06-03	9	ibdmdb	CD	L3+L4
2562672	8.27e-05	31003911470	MSM5LLGH	M2014	M2014C9_MBX	MSM5LLGH	M2014	M2014C9	2014-06-03	13	ibdmdb	CD	L1
7432665	0.000198146	37511057724	ESM5GEZ6	E5004	E5004C4_MBX	ESM5GEZ6	E5004	E5004C4	2014-06-10	7	ibdmdb	UC
3635933	0.000143019	25422808215	MSM5LLGR	M2028	M2028C4_MBX	MSM5LLGR	M2028	M2028C4	2014-06-12	7	ibdmdb	CD	L1
7581837	0.000201765	37577504154	HSM5MD7Z	H4007	H4007C1_MBX	HSM5MD7Z	H4007	H4007C1	2014-06-17	4	ibdmdb	CD	L3+L4
4765332	9.83e-05	48453649373	HSM5MD4W	H4004	H4004C3_MBX	HSM5MD4W	H4004	H4004C3	2014-06-17	6	ibdmdb	CD	L3
4267306	8.16e-05	52320204001	MSM5LLHQ	M2008	M2008C14_MBX	MSM5LLHQ	M2008	M2008C14	2014-06-20	19	ibdmdb	CD
3943188	8.99e-05	43846774493	HSM5MD8A	H4008	H4008C1_MBX	HSM5MD8A	H4008	H4008C1	2014-06-24	4	ibdmdb	nonIBD
18245031	0.000298403	61142215369	CSM5FZ44	C3002	C3002C5_MBX	CSM5FZ44	C3002	C3002C5	2014-06-24	8	ibdmdb	CD	L3
20726840	0.000318244	65128755039	MSM5LLEH	M2034	M2034C1_MBX	MSM5LLEH	M2034	M2034C1	2014-06-26	4	ibdmdb	CD	L3
5000290	9.14e-05	54721175514	HSM5MD82	H4009	H4009C1_MBX	HSM5MD82	H4009	H4009C1	2014-06-27	4	ibdmdb	nonIBD
7786688	0.00020599	37801352290	CSM5FZ4K	C3003	C3003C5_MBX	CSM5FZ4K	C3003	C3003C5	2014-07-01	8	ibdmdb	UC
22382949	0.000429361	52130815480	CSM5MCUU	C3005	C3005C4_MBX	CSM5MCUU	C3005	C3005C4	2014-07-01	7	ibdmdb	UC
15628010	0.000479939	32562469085	CSM5MCU4	C3008	C3008C1_MBX	CSM5MCU4	C3008	C3008C1	2014-07-01	4	ibdmdb	CD
11496346	0.000246669	46606305007	HSM5MD5K	H4001	H4001C9_MBX	HSM5MD5K	H4001	H4001C9	2014-07-01	13	ibdmdb	CD	L3+L4
7530474	0.000204881	36755341549	MSM5LLH8	M2027	M2027C5_MBX	MSM5LLH8	M2027	M2027C5	2014-07-01	8	ibdmdb	CD	L1
1276848	3.38e-05	37765126369	HSM5MD87	H4010	H4010C1_MBX	HSM5MD87	H4010	H4010C1	2014-07-08	4	ibdmdb	UC
186288122	0.00284506	65477662422	CSM5MCVH	C3009	C3009C1_MBX	CSM5MCVH	C3009	C3009C1	2014-07-08	4	ibdmdb	CD	L3
3360615	9.52e-05	35297263134	MSM5LLHM	M2025	M2025C5_MBX	MSM5LLHM	M2025	M2025C5	2014-07-09	8	ibdmdb	CD	L2
14242959	0.000499066	28539230717	CSM5MCUC	C3004	C3004C5_MBX	CSM5MCUC	C3004	C3004C5	2014-07-09	8	ibdmdb	UC
21663355	0.000471082	45986376235	CSM5MCVV	C3001	C3001C9_MBX	CSM5MCVV	C3001	C3001C9	2014-07-10	13	ibdmdb	CD	L3
5119013	0.000136225	37577504154	HSM5MD4Q	H4007	H4007C3_MBX	HSM5MD4Q	H4007	H4007C3	2014-07-15	6	ibdmdb	CD	L3+L4
8464091	0.000172309	49121716791	HSM5MD4A	H4006	H4006C4_MBX	HSM5MD4A	H4006	H4006C4	2014-07-15	7	ibdmdb	CD	L2+L4
1661434	3.43e-05	48453649373	HSM5MD51	H4004	H4004C5_MBX	HSM5MD51	H4004	H4004C5	2014-07-16	8	ibdmdb	CD	L3
14449719	4.77e-05	302684000000	MSM5LLEN	M2021	M2021C9_MBX	MSM5LLEN	M2021	M2021C9	2014-07-21	13	ibdmdb	CD	L2
14738802	0.000238002	61927347399	MSM6J2H9	M2039	M2039C1_MBX	MSM6J2H9	M2039	M2039C1	2014-07-21	4	ibdmdb	nonIBD
169791781	0.00267066	63576793892	CSM5MCUM	C3006	C3006C5_MBX	CSM5MCUM	C3006	C3006C5	2014-07-24	8	ibdmdb	UC
5056349	0.000115242	43875792727	HSM5MD3L	H4014	H4014C1_MBX	HSM5MD3L	H4014	H4014C1	2014-07-29	4	ibdmdb	CD	L3+L4
170475054	0.00515961	33040297442	CSM5MCWK	C3010	C3010C1_MBX	CSM5MCWK	C3010	C3010C1	2014-07-30	4	ibdmdb	CD	L3
2250866	6.52e-05	34511975144	HSM5MD8H	H4013	H4013C1_MBX	HSM5MD8H	H4013	H4013C1	2014-08-01	4	ibdmdb	nonIBD
25214156	0.000669037	37687241210	ESM5MEBE	E5001	E5001C11_MBX	ESM5MEBE	E5001	E5001C11	2014-08-12	15	ibdmdb	CD	L3+L4
4039864	0.000130302	31003911470	MSM6J2IQ	M2014	M2014C14_MBX	MSM6J2IQ	M2014	M2014C14	2014-08-13	19	ibdmdb	CD	L1
1971584	1.3e-05	151150000000	MSM6J2JF	M2041	M2041C1_MBX	MSM6J2JF	M2041	M2041C1	2014-08-14	4	ibdmdb	nonIBD
42675575	0.000988908	43154256833	HSM5MD62	H4015	H4015C2_MBX	HSM5MD62	H4015	H4015C2	2014-08-19	5	ibdmdb	CD	L3+L4
1376776	3.14e-05	43846774493	HSM5MD5D	H4008	H4008C5_MBX	HSM5MD5D	H4008	H4008C5	2014-08-19	8	ibdmdb	nonIBD
6098575	1.76e-06	3461420000000	ESM5MEDN	E5009	E5009C2_MBX	ESM5MEDN	E5009	E5009C2	2014-08-19	5	ibdmdb	CD	L1
7694764	0.000140618	54721175514	HSM5MD8B	H4009	H4009C5_MBX	HSM5MD8B	H4009	H4009C5	2014-08-19	8	ibdmdb	nonIBD
6190201	0.000190102	32562469085	CSM5MCW4	C3008	C3008C4_MBX	CSM5MCW4	C3008	C3008C4	2014-08-19	7	ibdmdb	CD
14390525	0.000235362	61142215369	CSM5MCVN	C3002	C3002C9_MBX	CSM5MCVN	C3002	C3002C9	2014-08-19	13	ibdmdb	CD	L3
20070616	0.000308168	65128755039	MSM5LLF4	M2034	M2034C5_MBX	MSM5LLF4	M2034	M2034C5	2014-08-20	8	ibdmdb	CD	L3
20624753	0.000548859	37577504154	HSM5MD4O	H4007	H4007C5_MBX	HSM5MD4O	H4007	H4007C5	2014-08-20	8	ibdmdb	CD	L3+L4
5662627	0.000150959	37511057724	ESM5MEBU	E5004	E5004C9_MBX	ESM5MEBU	E5004	E5004C9	2014-08-20	13	ibdmdb	UC
4739538	0.0001255	37765126369	HSM5MD43	H4010	H4010C4_MBX	HSM5MD43	H4010	H4010C4	2014-08-21	7	ibdmdb	UC
10221167	0.000150751	67801650352	MSM6J2HF	M2026	M2026C10_MBX	MSM6J2HF	M2026	M2026C10	2014-08-22	14	ibdmdb	UC
29444596	0.000728136	40438311573	CSM5MCXF	C3012	C3012C1_MBX	CSM5MCXF	C3012	C3012C1	2014-08-25	4	ibdmdb	CD	L1
34710162	0.000827583	41941620648	MSM6J2JH	M2042	M2042C1_MBX	MSM6J2JH	M2042	M2042C1	2014-08-26	4	ibdmdb	nonIBD
7862278	0.000168696	46606305007	HSM5MD7J	H4001	H4001C13_MBX	HSM5MD7J	H4001	H4001C13	2014-08-26	18	ibdmdb	CD	L3+L4
8095275	0.000318426	25422808215	MSM6J2IG	M2028	M2028C9_MBX	MSM6J2IG	M2028	M2028C9	2014-08-27	13	ibdmdb	CD	L1
2155708	4.12e-05	52320204001	MSM5LLDA	M2008	M2008C19_MBX	MSM5LLDA	M2008	M2008C19	2014-08-27	25	ibdmdb	CD
8445442	3.15e-05	268314000000	CSM5MCXB	C3011	C3011C1_MBX	CSM5MCXB	C3011	C3011C1	2014-08-27	4	ibdmdb	UC
82592144	0.0023399	35297263134	MSM6J2J5	M2025	M2025C9_MBX	MSM6J2J5	M2025	M2025C9	2014-08-28	13	ibdmdb	CD	L2
18686915	0.000179021	104384000000	HSM5MD5Z	H4016	H4016C1_MBX	HSM5MD5Z	H4016	H4016C1	2014-09-03	4	ibdmdb	nonIBD
7043917	0.000246815	28539230717	CSM5MCXL	C3004	C3004C9_MBX	CSM5MCXL	C3004	C3004C9	2014-09-03	13	ibdmdb	UC
57334952	0.000875641	65477662422	CSM5MCWE	C3009	C3009C5_MBX	CSM5MCWE	C3009	C3009C5	2014-09-03	8	ibdmdb	CD	L3
8352994	0.000179225	46606305007	HSM5MD7H	H4001	H4001C14_MBX	HSM5MD7H	H4001	H4001C14	2014-09-09	19	ibdmdb	CD	L3+L4
2708328	5.59e-05	48453649373	HSM5MD5P	H4004	H4004C9_MBX	HSM5MD5P	H4004	H4004C9	2014-09-09	13	ibdmdb	CD	L3
5579595	0.000151804	36755341549	MSM6J2KE	M2027	M2027C9_MBX	MSM6J2KE	M2027	M2027C9	2014-09-09	13	ibdmdb	CD	L1
18611337	0.000357012	52130815480	CSM5MCY8	C3005	C3005C9_MBX	CSM5MCY8	C3005	C3005C9	2014-09-09	13	ibdmdb	UC
4329796	0.000141941	30504244965	CSM5MCYU	C3013	C3013C1_MBX	CSM5MCYU	C3013	C3013C1	2014-09-09	4	ibdmdb	UC
3124141	8.36e-05	37350183337	ESM5MEB9	E5013	E5013C1_MBX	ESM5MEB9	E5013	E5013C1	2014-09-12	4	ibdmdb	CD	L1
38112270	0.00100822	37801352290	CSM5MCYK	C3003	C3003C10_MBX	CSM5MCYK	C3003	C3003C10	2014-09-12	14	ibdmdb	UC
3232408	2.56e-05	126245000000	HSM6XRQC	H4018	H4018C1_MBX	HSM6XRQC	H4018	H4018C1	2014-09-16	4	ibdmdb	nonIBD
133211525	0.00209529	63576793892	CSM5MCX3	C3006	C3006C9_MBX	CSM5MCX3	C3006	C3006C9	2014-09-16	13	ibdmdb	UC
10243539	0.000132256	77452188372	HSM6XRQB	H4017	H4017C1_MBX	HSM6XRQB	H4017	H4017C1	2014-09-17	4	ibdmdb	CD	L3+L4
11015626	0.000262642	41941620648	MSM6J2K6	M2042	M2042C5_MBX	MSM6J2K6	M2042	M2042C5	2014-09-23	8	ibdmdb	nonIBD
7792175	0.000177596	43875792727	HSM5MD6A	H4014	H4014C5_MBX	HSM5MD6A	H4014	H4014C5	2014-09-23	8	ibdmdb	CD	L3+L4
10078128	0.000266863	37765126369	HSM5MD3Y	H4010	H4010C6_MBX	HSM5MD3Y	H4010	H4010C6	2014-09-23	9	ibdmdb	UC
7662369	0.000155987	49121716791	HSM5MD7O	H4006	H4006C9_MBX	HSM5MD7O	H4006	H4006C9	2014-09-23	13	ibdmdb	CD	L2+L4
5431566	0.000164392	33040297442	CSM5MCXZ	C3010	C3010C5_MBX	CSM5MCXZ	C3010	C3010C5	2014-09-23	8	ibdmdb	CD	L3
7792671	0.000225796	34511975144	HSM5MD6K	H4013	H4013C5_MBX	HSM5MD6K	H4013	H4013C5	2014-09-24	8	ibdmdb	nonIBD
2458592	5.61e-05	43845301928	HSM6XRQE	H4019	H4019C1_MBX	HSM6XRQE	H4019	H4019C1	2014-09-30	4	ibdmdb	UC
5231800	8.6e-05	60841103406	CSM67U9T	C3015	C3015C1_MBX	CSM67U9T	C3015	C3015C1	2014-09-30	4	ibdmdb	UC
3348792	7.1e-05	47186667139	CSM67U9V	C3016	C3016C1_MBX	CSM67U9V	C3016	C3016C1	2014-09-30	4	ibdmdb	CD
3247680	4.9e-05	66340453075	CSM67U9X	C3017	C3017C1_MBX	CSM67U9X	C3017	C3017C1	2014-09-30	4	ibdmdb	CD	L3
9795060	0.000212999	45986376235	CSM67UA2	C3001	C3001C15_MBX	CSM67UA2	C3001	C3001C15	2014-09-30	20	ibdmdb	CD	L3
12058342	0.000194718	61927347399	MSM6J2HT	M2039	M2039C5_MBX	MSM6J2HT	M2039	M2039C5	2014-10-01	8	ibdmdb	nonIBD
178922763	0.00414612	43154256833	HSM5MD73	H4015	H4015C5_MBX	HSM5MD73	H4015	H4015C5	2014-10-02	8	ibdmdb	CD	L3+L4
5362883	1.55e-06	3461420000000	ESM5MEDD	E5009	E5009C6_MBX	ESM5MEDD	E5009	E5009C6	2014-10-07	9	ibdmdb	CD	L1
19089487	0.000472064	40438311573	CSM5MCZF	C3012	C3012C4_MBX	CSM5MCZF	C3012	C3012C4	2014-10-07	7	ibdmdb	CD	L1
4975143	0.000132397	37577504154	HSM6XRSN	H4007	H4007C9_MBX	HSM6XRSN	H4007	H4007C9	2014-10-08	13	ibdmdb	CD	L3+L4
10205325	6.75e-05	151150000000	MSM6J2JR	M2041	M2041C4_MBX	MSM6J2JR	M2041	M2041C4	2014-10-09	7	ibdmdb	nonIBD
8936334	3.33e-05	268314000000	CSM5MCYO	C3011	C3011C5_MBX	CSM5MCYO	C3011	C3011C5	2014-10-09	8	ibdmdb	UC
15893349	0.000369141	43054927352	PSM6XBQM	P6005	P6005C1_MBX	PSM6XBQM	P6005	P6005C1	2014-10-10	4	ibdmdb	CD	L3+L4
3458593	7.89e-05	43846774493	HSM6XRSZ	H4008	H4008C9_MBX	HSM6XRSZ	H4008	H4008C9	2014-10-14	13	ibdmdb	nonIBD
1961389	3.58e-05	54721175514	HSM6XRTC	H4009	H4009C9_MBX	HSM6XRTC	H4009	H4009C9	2014-10-14	13	ibdmdb	nonIBD
9115340	0.000241369	37765126369	HSM5MD41	H4010	H4010C8_MBX	HSM5MD41	H4010	H4010C8	2014-10-15	12	ibdmdb	UC
2238488	7.22e-05	31003911470	MSM6J2J1	M2014	M2014C19_MBX	MSM6J2J1	M2014	M2014C19	2014-10-21	25	ibdmdb	CD	L1
10640060	0.000156929	67801650352	MSM6J2OH	M2026	M2026C14_MBX	MSM6J2OH	M2026	M2026C14	2014-10-21	19	ibdmdb	UC
6122485	0.000188023	32562469085	CSM5MCZ3	C3008	C3008C9_MBX	CSM5MCZ3	C3008	C3008C9	2014-10-21	13	ibdmdb	CD
5550795	4.06e-07	13686000000000	HSM67VDX	H4022	H4022C1_MBX	HSM67VDX	H4022	H4022C1	2014-10-28	4	ibdmdb	nonIBD
97820099	0.00149395	65477662422	CSM67UAA	C3009	C3009C9_MBX	CSM67UAA	C3009	C3009C9	2014-10-28	13	ibdmdb	CD	L3
14184809	0.000231997	61142215369	CSM67UBH	C3002	C3002C14_MBX	CSM67UBH	C3002	C3002C14	2014-10-28	19	ibdmdb	CD	L3
11034275	0.000292785	37687241210	ESM5MEBG	E5001	E5001C16_MBX	ESM5MEBG	E5001	E5001C16	2014-10-29	21	ibdmdb	CD	L3+L4
10650011	0.000163522	65128755039	MSM6J2LL	M2034	M2034C10_MBX	MSM6J2LL	M2034	M2034C10	2014-10-29	14	ibdmdb	CD	L3
24971798	0.00023923	104384000000	HSM5MD6U	H4016	H4016C5_MBX	HSM5MD6U	H4016	H4016C5	2014-10-29	8	ibdmdb	nonIBD
3992999	0.000157064	25422808215	MSM6J2Q3	M2028	M2028C14_MBX	MSM6J2Q3	M2028	M2028C14	2014-10-29	19	ibdmdb	CD	L1
14508066	0.000386768	37511057724	ESM5MEC5	E5004	E5004C14_MBX	ESM5MEC5	E5004	E5004C14	2014-10-30	19	ibdmdb	UC
24504660	0.00080332	30504244965	CSM67U9P	C3013	C3013C5_MBX	CSM67U9P	C3013	C3013C5	2014-11-04	8	ibdmdb	UC
13038795	0.000279765	46606305007	HSM5MD79	H4001	H4001C18_MBX	HSM5MD79	H4001	H4001C18	2014-11-04	23	ibdmdb	CD	L3+L4
8567903	0.000238239	35963516726	HSM67VCZ	H4020	H4020C3_MBX	HSM67VCZ	H4020	H4020C3	2014-11-04	6	ibdmdb	CD	L1+L4
3656679	9.95e-05	36755341549	MSM6J2R2	M2027	M2027C14_MBX	MSM6J2R2	M2027	M2027C14	2014-11-04	19	ibdmdb	CD	L1
6840791	0.000183153	37350183337	ESM718V8	E5013	E5013C5_MBX	ESM718V8	E5013	E5013C5	2014-11-05	8	ibdmdb	CD	L1
4116907	1.36e-05	302684000000	MSM6J2LT	M2021	M2021C17_MBX	MSM6J2LT	M2021	M2021C17	2014-11-05	22	ibdmdb	CD	L2
5685240	0.000117334	48453649373	HSM6XRSG	H4004	H4004C13_MBX	HSM6XRSG	H4004	H4004C13	2014-11-05	18	ibdmdb	CD	L3
12341890	0.000326493	37801352290	CSM67UBZ	C3003	C3003C14_MBX	CSM67UBZ	C3003	C3003C14	2014-11-06	19	ibdmdb	UC
16715078	0.000414688	40307593711	MSM6J2Q1	M2048	M2048C1_MBX	MSM6J2Q1	M2048	M2048C1	2014-11-07	4	ibdmdb	nonIBD
7395052	0.000171483	43124018484	PSM6XBRK	P6009	P6009C1_MBX	PSM6XBRK	P6009	P6009C1	2014-11-12	4	ibdmdb	CD	L2
5035374	3.99e-05	126245000000	HSM6XRQW	H4018	H4018C5_MBX	HSM6XRQW	H4018	H4018C5	2014-11-12	8	ibdmdb	nonIBD
16180293	0.000389029	41591481975	HSM67VDR	H4023	H4023C1_MBX	HSM67VDR	H4023	H4023C1	2014-11-14	4	ibdmdb	nonIBD
57340649	1.66e-05	3461420000000	ESM718UH	E5009	E5009C9_MBX	ESM718UH	E5009	E5009C9	2014-11-18	13	ibdmdb	CD	L1
4312571	0.000122179	35297263134	MSM6J2PE	M2025	M2025C14_MBX	MSM6J2PE	M2025	M2025C14	2014-11-18	19	ibdmdb	CD	L2
4893011	6.32e-05	77452188372	HSM6XRQM	H4017	H4017C5_MBX	HSM6XRQM	H4017	H4017C5	2014-11-19	8	ibdmdb	CD	L3+L4
5888146	0.000178211	33040297442	CSM67UCK	C3010	C3010C9_MBX	CSM67UCK	C3010	C3010C9	2014-11-20	13	ibdmdb	CD	L3
4019164	0.000116457	34511975144	HSM6XRRJ	H4013	H4013C9_MBX	HSM6XRRJ	H4013	H4013C9	2014-11-20	13	ibdmdb	nonIBD
26653751	0.000607482	43875792727	HSM6XRRV	H4014	H4014C9_MBX	HSM6XRRV	H4014	H4014C9	2014-11-20	13	ibdmdb	CD	L3+L4
5559326	6.91e-06	804625000000	CSM67UH7	C3022	C3022C1_MBX	CSM67UH7	C3022	C3022C1	2014-11-24	4	ibdmdb	nonIBD
31059467	0.000719731	43154256833	HSM6XRS8	H4015	H4015C9_MBX	HSM6XRS8	H4015	H4015C9	2014-11-25	13	ibdmdb	CD	L3+L4
4814039	7.91e-05	60841103406	CSM67UAQ	C3015	C3015C5_MBX	CSM67UAQ	C3015	C3015C5	2014-11-25	8	ibdmdb	UC
6008357	0.000127332	47186667139	CSM67UB1	C3016	C3016C5_MBX	CSM67UB1	C3016	C3016C5	2014-11-25	8	ibdmdb	CD
3443572	0.000120661	28539230717	CSM67UDN	C3004	C3004C15_MBX	CSM67UDN	C3004	C3004C15	2014-11-25	20	ibdmdb	UC
14711337	0.000231395	63576793892	CSM67UFZ	C3006	C3006C14_MBX	CSM67UFZ	C3006	C3006C14	2014-11-25	19	ibdmdb	UC
7870963	0.000134213	58645114432	CSM79HG4	C3023	C3023C1_MBX	CSM79HG4	C3023	C3023C1	2014-11-25	4	ibdmdb	CD	L3
93782324	0.00190918	49121716791	HSM67VEE	H4006	H4006C14_MBX	HSM67VEE	H4006	H4006C14	2014-12-02	19	ibdmdb	CD	L2+L4
27349774	0.000412264	66340453075	CSM67UBB	C3017	C3017C5_MBX	CSM67UBB	C3017	C3017C5	2014-12-02	8	ibdmdb	CD	L3
8314599	0.000159495	52130815480	CSM67UEA	C3005	C3005C15_MBX	CSM67UEA	C3005	C3005C15	2014-12-02	20	ibdmdb	UC
4328404	1.61e-05	268314000000	CSM67UEW	C3011	C3011C9_MBX	CSM67UEW	C3011	C3011C9	2014-12-08	13	ibdmdb	UC
55548821	0.000897	61927347399	MSM6J2QP	M2039	M2039C10_MBX	MSM6J2QP	M2039	M2039C10	2014-12-09	14	ibdmdb	nonIBD
17280451	0.000457577	37765126369	HSM6XRTM	H4010	H4010C12_MBX	HSM6XRTM	H4010	H4010C12	2014-12-09	16	ibdmdb	UC
9999280	0.000228058	43845301928	HSM6XRRD	H4019	H4019C6_MBX	HSM6XRRD	H4019	H4019C6	2014-12-09	9	ibdmdb	UC
16184389	1.18e-06	13686000000000	HSM67VES	H4022	H4022C4_MBX	HSM67VES	H4022	H4022C4	2014-12-09	7	ibdmdb	nonIBD
14831841	0.000242579	61142215369	CSM67UBN	C3002	C3002C17_MBX	CSM67UBN	C3002	C3002C17	2014-12-09	22	ibdmdb	CD	L3
76549225	0.0013989	54721175514	HSM67VGA	H4009	H4009C13_MBX	HSM67VGA	H4009	H4009C13	2014-12-10	18	ibdmdb	nonIBD
20682230	0.000493119	41941620648	MSM6J2RO	M2042	M2042C10_MBX	MSM6J2RO	M2042	M2042C10	2014-12-10	14	ibdmdb	nonIBD
6462842	0.000150107	43054927352	PSM6XBQY	P6005	P6005C5_MBX	PSM6XBQY	P6005	P6005C5	2014-12-10	8	ibdmdb	CD	L3+L4
8394656	0.000182547	45986376235	CSM79HGP	C3001	C3001C20_MBX	CSM79HGP	C3001	C3001C20	2014-12-10	26	ibdmdb	CD	L3
4050785	7.74e-05	52320204001	MSM6J2LB	M2008	M2008C22_MBX	MSM6J2LB	M2008	M2008C22	2014-12-12	28	ibdmdb	CD
12080826	0.000247891	48734329407	CSM79HHO	C3021	C3021C2_MBX	CSM79HHO	C3021	C3021C2	2014-12-12	5	ibdmdb	CD	L2
4102309	3.22e-05	127498000000	HSM67VI5	H4024	H4024C3_MBX	HSM67VI5	H4024	H4024C3	2014-12-16	6	ibdmdb	nonIBD
3971890	0.000110442	35963516726	HSM67VD6	H4020	H4020C6_MBX	HSM67VD6	H4020	H4020C6	2014-12-16	9	ibdmdb	CD	L1+L4
5219748	0.000138502	37687241210	ESM5MECL	E5001	E5001C20_MBX	ESM5MECL	E5001	E5001C20	2014-12-16	26	ibdmdb	CD	L3+L4
5629651	0.000153166	36755341549	MSM6J2R8	M2027	M2027C17_MBX	MSM6J2R8	M2027	M2027C17	2014-12-17	22	ibdmdb	CD	L1
5232762	0.00011668	44847143013	PSM6XBSI	P6010	P6010C2_MBX	PSM6XBSI	P6010	P6010C2	2014-12-17	5	ibdmdb	CD	L3+L4
5892005	0.000145704	40438311573	CSM67UGO	C3012	C3012C9_MBX	CSM67UGO	C3012	C3012C9	2014-12-17	13	ibdmdb	CD	L1
51902826	0.00117399	44210736319	PSM6XBSE	P6012	P6012C1_MBX	PSM6XBSE	P6012	P6012C1	2014-12-19	4	ibdmdb	UC
153870103	0.00236255	65128755039	MSM6J2MB	M2034	M2034C14_MBX	MSM6J2MB	M2034	M2034C14	2014-12-19	19	ibdmdb	CD	L3
6876585	4.55e-05	151150000000	MSM6J2SE	M2041	M2041C9_MBX	MSM6J2SE	M2041	M2041C9	2014-12-23	13	ibdmdb	nonIBD
7991929	7.66e-05	104384000000	HSM67VF3	H4016	H4016C9_MBX	HSM67VF3	H4016	H4016C9	2014-12-23	13	ibdmdb	nonIBD
24022006	0.000591277	40627334239	MSM6J2PO	M2047	M2047C1_MBX	MSM6J2PO	M2047	M2047C1	2014-12-23	4	ibdmdb	nonIBD
1731632	4.02e-05	43124018484	PSM6XBS6	P6009	P6009C4_MBX	PSM6XBS6	P6009	P6009C4	2014-12-23	7	ibdmdb	CD	L2
2089463	4.77e-05	43846774493	HSM67VFZ	H4008	H4008C14_MBX	HSM67VFZ	H4008	H4008C14	2014-12-23	19	ibdmdb	nonIBD
4605210	0.000108635	42391742854	CSM79HJM	C3027	C3027C2_MBX	CSM79HJM	C3027	C3027C2	2015-01-06	5	ibdmdb	CD
14741754	0.000483269	30504244965	CSM79HGH	C3013	C3013C9_MBX	CSM79HGH	C3013	C3013C9	2015-01-07	13	ibdmdb	UC
4247881	0.000148258	28652017201	CSM79HJE	C3028	C3028C1_MBX	CSM79HJE	C3028	C3028C1	2015-01-07	4	ibdmdb	CD
9971918	0.000266984	37350183337	ESM718TM	E5013	E5013C9_MBX	ESM718TM	E5013	E5013C9	2015-01-08	13	ibdmdb	CD	L1
4632718	0.000122672	37765126369	HSM6XRTQ	H4010	H4010C14_MBX	HSM6XRTQ	H4010	H4010C14	2015-01-12	19	ibdmdb	UC
2344522	5.06e-05	46345955762	MSM6J2NA	M2061	M2061C1_MBX	MSM6J2NA	M2061	M2061C1	2015-01-13	4	ibdmdb	nonIBD
15405731	0.000496896	31003911470	MSM6J2QZ	M2014	M2014C24_MBX	MSM6J2QZ	M2014	M2014C24	2015-01-13	30	ibdmdb	CD	L1
11926660	4.45e-05	268314000000	CSM67UF5	C3011	C3011C11_MBX	CSM67UF5	C3011	C3011C11	2015-01-12	15	ibdmdb	UC
19745860	0.000489879	40307593711	MSM6J2M3	M2048	M2048C5_MBX	MSM6J2M3	M2048	M2048C5	2015-01-15	8	ibdmdb	nonIBD
14498591	0.000385832	37577504154	HSM67VHU	H4007	H4007C15_MBX	HSM67VHU	H4007	H4007C15	2015-01-15	20	ibdmdb	CD	L3+L4
13770275	0.000390123	35297263134	MSM6J2PM	M2025	M2025C19_MBX	MSM6J2PM	M2025	M2025C19	2015-01-16	25	ibdmdb	CD	L2
5660858	0.00012911	43845301928	HSM6XRV2	H4019	H4019C9_MBX	HSM6XRV2	H4019	H4019C9	2015-01-20	13	ibdmdb	UC
5750171	0.000138254	41591481975	HSM6XRQ8	H4023	H4023C6_MBX	HSM6XRQ8	H4023	H4023C6	2015-01-20	9	ibdmdb	nonIBD
32860821	0.000260294	126245000000	HSM67VFR	H4018	H4018C10_MBX	HSM67VFR	H4018	H4018C10	2015-01-20	14	ibdmdb	nonIBD
4157312	0.00014567	28539230717	CSM79HLA	C3004	C3004C19_MBX	CSM79HLA	C3004	C3004C19	2015-01-20	25	ibdmdb	UC
5761042	9.82e-05	58645114432	CSM79HH8	C3023	C3023C5_MBX	CSM79HH8	C3023	C3023C5	2015-01-20	8	ibdmdb	CD	L3
123221074	0.00244917	50311458585	PSM6XBT3	P6013	P6013C2_MBX	PSM6XBT3	P6013	P6013C2	2015-01-21	5	ibdmdb	UC
7538213	0.00011118	67801650352	MSM6J2OP	M2026	M2026C21_MBX	MSM6J2OP	M2026	M2026C21	2015-01-21	27	ibdmdb	UC
1720407	2.59e-05	66340453075	CSM79HJ6	C3017	C3017C9_MBX	CSM79HJ6	C3017	C3017C9	2015-01-21	13	ibdmdb	CD	L3
2909698	6.17e-05	47186667139	CSM79HIT	C3016	C3016C9_MBX	CSM79HIT	C3016	C3016C9	2015-01-22	13	ibdmdb	CD
6450802	1.86e-06	3461420000000	ESM7F5AK	E5009	E5009C13_MBX	ESM7F5AK	E5009	E5009C13	2015-01-26	18	ibdmdb	CD	L1
11216656	0.000240668	46606305007	HSM67VEA	H4001	H4001C24_MBX	HSM67VEA	H4001	H4001C24	2015-01-28	30	ibdmdb	CD	L3+L4
2957424	6.1e-05	48453649373	HSM7CYZT	H4004	H4004C19_MBX	HSM7CYZT	H4004	H4004C19	2015-01-28	25	ibdmdb	CD	L3
3492441	4.16e-05	83952383344	MSM79H52	M2060	M2060C2_MBX	MSM79H52	M2060	M2060C2	2015-01-29	5	ibdmdb	nonIBD
17019845	0.000493158	34511975144	HSM6XRVC	H4013	H4013C14_MBX	HSM6XRVC	H4013	H4013C14	2015-01-27	19	ibdmdb	nonIBD
25600700	0.00030709	83365545089	CSM79HJI	C3030	C3030C1_MBX	CSM79HJI	C3030	C3030C1	2015-01-29	4	ibdmdb	CD	L2
14932127	0.000286436	52130815480	CSM67UEI	C3005	C3005C19_MBX	CSM67UEI	C3005	C3005C19	2015-01-29	25	ibdmdb	UC
5962834	0.000165802	35963516726	HSM67VHF	H4020	H4020C9_MBX	HSM67VHF	H4020	H4020C9	2015-01-27	13	ibdmdb	CD	L1+L4
8607632	0.000256913	33504010821	CSM79HJG	C3029	C3029C1_MBX	CSM79HJG	C3029	C3029C1	2015-01-29	4	ibdmdb	UC
5326166	0.000141989	37511057724	ESM718SY	E5004	E5004C20_MBX	ESM718SY	E5004	E5004C20	2015-01-29	26	ibdmdb	UC
11344249	0.000300102	37801352290	CSM79HLM	C3003	C3003C19_MBX	CSM79HLM	C3003	C3003C19	2015-01-29	25	ibdmdb	UC
2643368	6.03e-05	43846774493	HSM67VG6	H4008	H4008C17_MBX	HSM67VG6	H4008	H4008C17	2015-02-03	22	ibdmdb	nonIBD
15748231	0.000358928	43875792727	HSM6XRVO	H4014	H4014C14_MBX	HSM6XRVO	H4014	H4014C14	2015-02-03	19	ibdmdb	CD	L3+L4
58753346	0.00136147	43154256833	HSM7CYZ7	H4015	H4015C14_MBX	HSM7CYZ7	H4015	H4015C14	2015-02-03	19	ibdmdb	CD	L3+L4
37881364	0.000622628	60841103406	CSM79HIJ	C3015	C3015C10_MBX	CSM79HIJ	C3015	C3015C10	2015-02-03	14	ibdmdb	UC
10551378	0.000165963	63576793892	CSM79HMN	C3006	C3006C19_MBX	CSM79HMN	C3006	C3006C19	2015-02-03	25	ibdmdb	UC
20096138	0.000437002	45986376235	CSM79HMZ	C3001	C3001C24_MBX	CSM79HMZ	C3001	C3001C24	2015-02-03	30	ibdmdb	CD	L3
63682781	0.000972588	65477662422	CSM79HI7	C3009	C3009C15_MBX	CSM79HI7	C3009	C3009C15	2015-02-03	20	ibdmdb	CD	L3
3815527	0.000115481	33040297442	CSM79HKB	C3010	C3010C13_MBX	CSM79HKB	C3010	C3010C13	2015-02-03	18	ibdmdb	CD	L3
6194212	4.53e-07	13686000000000	HSM7CYZJ	H4022	H4022C8_MBX	HSM7CYZJ	H4022	H4022C8	2015-02-04	12	ibdmdb	nonIBD
19053852	0.000292557	65128755039	MSM6J2MH	M2034	M2034C17_MBX	MSM6J2MH	M2034	M2034C17	2015-02-04	22	ibdmdb	CD	L3
11563441	0.000110778	104384000000	HSM67VHM	H4016	H4016C12_MBX	HSM67VHM	H4016	H4016C12	2015-02-04	16	ibdmdb	nonIBD
14628054	0.00044923	32562469085	CSM79HKR	C3008	C3008C16_MBX	CSM79HKR	C3008	C3008C16	2015-02-04	21	ibdmdb	CD
45362828	5.64e-05	804625000000	CSM79HGZ	C3022	C3022C5_MBX	CSM79HGZ	C3022	C3022C5	2015-02-04	8	ibdmdb	nonIBD
47949552	0.000876252	54721175514	HSM67VGG	H4009	H4009C17_MBX	HSM67VGG	H4009	H4009C17	2015-02-04	22	ibdmdb	nonIBD
3821916	8.88e-05	43054927352	PSM6XBSS	P6005	P6005C9_MBX	PSM6XBSS	P6005	P6005C9	2015-02-05	13	ibdmdb	CD	L3+L4
9989302	0.000225947	44210736319	PSM6XBVM	P6012	P6012C4_MBX	PSM6XBVM	P6012	P6012C4	2015-02-05	7	ibdmdb	UC
3521061	7.85e-05	44847143013	PSM6XBSK	P6010	P6010C5_MBX	PSM6XBSK	P6010	P6010C5	2015-02-05	8	ibdmdb	CD	L3+L4
6666142	0.000232659	28652017201	CSM79HKZ	C3028	C3028C3_MBX	CSM79HKZ	C3028	C3028C3	2015-02-05	6	ibdmdb	CD
1896794	4.67e-05	40627334239	MSM6J2PU	M2047	M2047C4_MBX	MSM6J2PU	M2047	M2047C4	2015-02-11	7	ibdmdb	nonIBD
75215612	0.00295859	25422808215	MSM79H63	M2028	M2028C20_MBX	MSM79H63	M2028	M2028C20	2015-02-11	26	ibdmdb	CD	L1
6409124	0.000130474	49121716791	HSM7CYX2	H4006	H4006C19_MBX	HSM7CYX2	H4006	H4006C19	2015-02-11	25	ibdmdb	CD	L2+L4
25522551	0.000683331	37350183337	ESM718TF	E5013	E5013C12_MBX	ESM718TF	E5013	E5013C12	2015-02-11	16	ibdmdb	CD	L1
3453220	8.15e-05	42391742854	CSM79HJS	C3027	C3027C5_MBX	CSM79HJS	C3027	C3027C5	2015-02-11	8	ibdmdb	CD
12228055	0.000177283	68974735309	HSM7CZ1T	H4027	H4027C2_MBX	HSM7CZ1T	H4027	H4027C2	2015-02-11	5	ibdmdb	UC	L2+L4
16128052	0.000263779	61142215369	CSM79HK1	C3002	C3002C21_MBX	CSM79HK1	C3002	C3002C21	2015-02-11	27	ibdmdb	CD	L3
19920561	0.000492616	40438311573	CSM79HOJ	C3012	C3012C13_MBX	CSM79HOJ	C3012	C3012C13	2015-02-11	18	ibdmdb	CD	L1
3074504	6.63e-05	46345955762	MSM79H5G	M2061	M2061C3_MBX	MSM79H5G	M2061	M2061C3	2015-02-11	6	ibdmdb	nonIBD
1709367	3.96e-05	43124018484	PSM6XBTF	P6009	P6009C8_MBX	PSM6XBTF	P6009	P6009C8	2015-02-17	12	ibdmdb	CD	L2
159722459	0.00257919	61927347399	MSM79H5Q	M2039	M2039C16_MBX	MSM79H5Q	M2039	M2039C16	2015-02-27	21	ibdmdb	nonIBD
9179348	0.000156524	58645114432	CSM79HPA	C3023	C3023C8_MBX	CSM79HPA	C3023	C3023C8	2015-03-03	12	ibdmdb	CD	L3
7776329	6.16e-05	126245000000	HSM7CYYF	H4018	H4018C13_MBX	HSM7CYYF	H4018	H4018C13	2015-03-03	18	ibdmdb	nonIBD
6333689	0.000151012	41941620648	MSM79H6F	M2042	M2042C15_MBX	MSM79H6F	M2042	M2042C15	2015-03-04	20	ibdmdb	nonIBD
183467705	0.00280199	65477662422	CSM79HIB	C3009	C3009C18_MBX	CSM79HIB	C3009	C3009C18	2015-03-04	23	ibdmdb	CD	L3
9089269	0.000263366	34511975144	HSM6XRVK	H4013	H4013C18_MBX	HSM6XRVK	H4013	H4013C18	2015-03-12	23	ibdmdb	nonIBD
45433898	0.000932277	48734329407	CSM79HN6	C3021	C3021C9_MBX	CSM79HN6	C3021	C3021C9	2015-03-12	13	ibdmdb	CD	L2
12825550	0.000165593	77452188372	HSM7CYY3	H4017	H4017C14_MBX	HSM7CYY3	H4017	H4017C14	2015-03-24	19	ibdmdb	CD	L3+L4
4755288	0.000106033	44847143013	PSM6XBUG	P6010	P6010C8_MBX	PSM6XBUG	P6010	P6010C8	2015-03-24	12	ibdmdb	CD	L3+L4
5696666	0.000161	35382940583	PSM7J19B	P6016	P6016C3_MBX	PSM7J19B	P6016	P6016C3	2015-03-25	6	ibdmdb	CD	L3+L4
32672420	0.000950297	34381254411	HSM7CZ32	H4030	H4030C3_MBX	HSM7CZ32	H4030	H4030C3	2015-04-03	6	ibdmdb	CD	L1+L4
5972300	0.000121582	49121716791	HSM7CYXA	H4006	H4006C23_MBX	HSM7CYXA	H4006	H4006C23	2015-04-07	29	ibdmdb	CD	L2+L4
2602805	5.37e-05	48453649373	HSM7CZ14	H4004	H4004C24_MBX	HSM7CZ14	H4004	H4004C24	2015-04-07	30	ibdmdb	CD	L3
4788454	1.74e-05	275561000000	PSM7J1A2	P6018	P6018C4_MBX	PSM7J1A2	P6018	P6018C4	2015-04-08	7	ibdmdb	nonIBD
35446705	0.00128313	27625100770	HSM7J4Q3	H4032	H4032C3_MBX	HSM7J4Q3	H4032	H4032C3	2015-04-08	6	ibdmdb	CD	L3+L4
2468057	5.63e-05	43845301928	HSM7J4PE	H4019	H4019C14_MBX	HSM7J4PE	H4019	H4019C14	2015-04-14	19	ibdmdb	UC
20499589	0.000672024	30504244965	CSM79HPS	C3013	C3013C16_MBX	CSM79HPS	C3013	C3013C16	2015-04-14	21	ibdmdb	UC
43458560	0.00100705	43154256833	HSM7J4QB	H4015	H4015C19_MBX	HSM7J4QB	H4015	H4015C19	2015-04-15	25	ibdmdb	CD	L3+L4
9888638	0.000225378	43875792727	HSM6XRVW	H4014	H4014C20_MBX	HSM6XRVW	H4014	H4014C20	2015-04-21	26	ibdmdb	CD	L3+L4
10450505	1.3e-05	804625000000	CSM79HP4	C3022	C3022C11_MBX	CSM79HP4	C3022	C3022C11	2015-04-21	15	ibdmdb	nonIBD
4499990	0.000108195	41591481975	HSM7J4HC	H4023	H4023C14_MBX	HSM7J4HC	H4023	H4023C14	2015-05-05	19	ibdmdb	nonIBD
3806753	9.06e-05	42023381306	HSM7CZ3G	H4031	H4031C5_MBX	HSM7CZ3G	H4031	H4031C5	2015-05-05	8	ibdmdb	CD	L1+L4
7794863	0.000212354	36706855932	MSM79HDA	M2069	M2069C3_MBX	MSM79HDA	M2069	M2069C3	2015-05-05	6	ibdmdb	UC
107385501	0.00220349	48734329407	CSM7KOLK	C3021	C3021C14_MBX	CSM7KOLK	C3021	C3021C14	2015-05-05	19	ibdmdb	CD	L2
43144279	0.000799197	53984513820	CSM79HRG	C3031	C3031C7_MBX	CSM79HRG	C3031	C3031C7	2015-05-08	11	ibdmdb	CD
1509890	3.5e-05	43124018484	PSM7J1CK	P6009	P6009C14_MBX	PSM7J1CK	P6009	P6009C14	2015-05-12	19	ibdmdb	CD	L2
5689503	0.000140041	40627334239	MSM79HC8	M2047	M2047C11_MBX	MSM79HC8	M2047	M2047C11	2015-05-12	15	ibdmdb	nonIBD
17671845	9.48e-05	186437000000	PSM7J177	P6028	P6028C2_MBX	PSM7J177	P6028	P6028C2	2015-05-12	5	ibdmdb	CD	L1+L4
3158266	7.2e-05	43846774493	HSM7CZ2P	H4008	H4008C24_MBX	HSM7CZ2P	H4008	H4008C24	2015-05-05	30	ibdmdb	nonIBD
5867906	0.000170672	34381254411	HSM7CZ38	H4030	H4030C6_MBX	HSM7CZ38	H4030	H4030C6	2015-05-12	9	ibdmdb	CD	L1+L4
327629259	0.00651202	50311458585	PSM7J1AU	P6013	P6013C10_MBX	PSM7J1AU	P6013	P6013C10	2015-05-12	14	ibdmdb	UC
52189272	0.000786689	66340453075	CSM7KOKN	C3017	C3017C17_MBX	CSM7KOKN	C3017	C3017C17	2015-05-12	22	ibdmdb	CD	L3
6071695	0.000103533	58645114432	CSM7KONA	C3023	C3023C13_MBX	CSM7KONA	C3023	C3023C13	2015-05-12	18	ibdmdb	CD	L3
12665168	0.000121332	104384000000	HSM7J4I3	H4016	H4016C19_MBX	HSM7J4I3	H4016	H4016C19	2015-05-12	25	ibdmdb	nonIBD
14611346	0.000339365	43054927352	PSM7J1CC	P6005	P6005C16_MBX	PSM7J1CC	P6005	P6005C16	2015-05-12	21	ibdmdb	CD	L3+L4
18616293	0.000378924	49129400045	PSM7J1BN	P6024	P6024C5_MBX	PSM7J1BN	P6024	P6024C5	2015-05-12	8	ibdmdb	CD	L3+L4
796118	1.91e-05	41754730040	MSM79HAJ	M2064	M2064C7_MBX	MSM79HAJ	M2064	M2064C7	2015-05-14	11	ibdmdb	UC
8352085	6.1e-07	13686000000000	HSM7J4G1	H4022	H4022C15_MBX	HSM7J4G1	H4022	H4022C15	2015-05-14	20	ibdmdb	nonIBD
38807376	0.000822422	47186667139	CSM7KOKB	C3016	C3016C17_MBX	CSM7KOKB	C3016	C3016C17	2015-05-14	22	ibdmdb	CD
12258183	0.000224012	54721175514	HSM7CYYZ	H4009	H4009C24_MBX	HSM7CYYZ	H4009	H4009C24	2015-05-15	30	ibdmdb	nonIBD
16641119	0.000110097	151150000000	MSM79HEY	M2041	M2041C19_MBX	MSM79HEY	M2041	M2041C19	2015-05-19	25	ibdmdb	nonIBD
3680703	0.000104025	35382940583	PSM7J19J	P6016	P6016C7_MBX	PSM7J19J	P6016	P6016C7	2015-05-19	11	ibdmdb	CD	L3+L4
3036062	7.16e-05	42391742854	CSM79HR6	C3027	C3027C12_MBX	CSM79HR6	C3027	C3027C12	2015-05-19	16	ibdmdb	CD
4190604	0.000126833	33040297442	CSM7KOLA	C3010	C3010C22_MBX	CSM7KOLA	C3010	C3010C22	2015-05-19	28	ibdmdb	CD	L3
3021241	5.82e-05	51873394766	HSM7J4HO	H4035	H4035C3_MBX	HSM7J4HO	H4035	H4035C3	2015-05-19	6	ibdmdb	UC
8973823	0.000294183	30504244965	CSM7KONS	C3013	C3013C20_MBX	CSM7KONS	C3013	C3013C20	2015-05-20	26	ibdmdb	UC
20736973	0.000530081	39120385451	CSM79HQL	C3032	C3032C1_MBX	CSM79HQL	C3032	C3032C1	2015-05-20	4	ibdmdb	UC
27246341	0.000813226	33504010821	CSM7KOLY	C3029	C3029C9_MBX	CSM7KOLY	C3029	C3029C9	2015-05-20	13	ibdmdb	UC
3907339	0.000113217	34511975144	HSM7J4R2	H4013	H4013C22_MBX	HSM7J4R2	H4013	H4013C22	2015-05-21	28	ibdmdb	nonIBD
45309325	0.00125987	35963516726	HSM7J4PW	H4020	H4020C17_MBX	HSM7J4PW	H4020	H4020C17	2015-05-22	22	ibdmdb	CD	L1+L4
49239341	0.000590644	83365545089	CSM7KOMB	C3030	C3030C9_MBX	CSM7KOMB	C3030	C3030C9	2015-05-22	13	ibdmdb	CD	L2
4986537	0.000107594	46345955762	MSM79H9Q	M2061	M2061C10_MBX	MSM79H9Q	M2061	M2061C10	2015-05-27	14	ibdmdb	nonIBD
14226806	0.000242591	58645114432	CSM7KONC	C3023	C3023C14_MBX	CSM7KONC	C3023	C3023C14	2015-05-27	19	ibdmdb	CD	L3
61356264	0.000937056	65477662422	CSM7KOJO	C3009	C3009C24_MBX	CSM7KOJO	C3009	C3009C24	2015-05-27	30	ibdmdb	CD	L3
4532712	1.31e-06	3461420000000	ESM9IEP5	E5009	E5009C23_MBX	ESM9IEP5	E5009	E5009C23	2015-05-27	29	ibdmdb	CD	L1
1918976	4.27e-05	44908660367	MSM79HDQ	M2068	M2068C5_MBX	MSM79HDQ	M2068	M2068C5	2015-05-27	8	ibdmdb	CD	L1
3804995	3.01e-05	126245000000	HSM7J4LD	H4018	H4018C19_MBX	HSM7J4LD	H4018	H4018C19	2015-05-27	25	ibdmdb	nonIBD
10097587	0.000301263	33517565739	MSM79HD6	M2071	M2071C1_MBX	MSM79HD6	M2071	M2071C1	2015-05-28	4	ibdmdb	UC
3000548	3.73e-06	804625000000	CSM7KOOH	C3022	C3022C14_MBX	CSM7KOOH	C3022	C3022C14	2015-05-29	19	ibdmdb	nonIBD
61823296	0.00139838	44210736319	PSM7J1BF	P6012	P6012C13_MBX	PSM7J1BF	P6012	P6012C13	2015-06-02	18	ibdmdb	UC
6449541	0.000159491	40438311573	CSM7KON2	C3012	C3012C21_MBX	CSM7KON2	C3012	C3012C21	2015-06-02	27	ibdmdb	CD	L1
49026943	0.00133563	36706855932	MSM79HDE	M2069	M2069C5_MBX	MSM79HDE	M2069	M2069C5	2015-06-02	8	ibdmdb	UC
10110380	0.000225441	44847143013	PSM6XBUO	P6010	P6010C14_MBX	PSM6XBUO	P6010	P6010C14	2015-06-02	19	ibdmdb	CD	L3+L4
8219360	0.000119165	68974735309	HSM7J4GR	H4027	H4027C10_MBX	HSM7J4GR	H4027	H4027C10	2015-06-02	14	ibdmdb	UC	L2+L4
14798091	0.000354327	41763987456	PSM7J19V	P6017	P6017C8_MBX	PSM7J19V	P6017	P6017C8	2015-06-02	12	ibdmdb	nonIBD
6876566	0.000163956	41941620648	MSM79HA3	M2042	M2042C22_MBX	MSM79HA3	M2042	M2042C22	2015-06-03	28	ibdmdb	nonIBD
36985714	0.00133884	27625100770	HSM7J4MS	H4032	H4032C7_MBX	HSM7J4MS	H4032	H4032C7	2015-06-03	11	ibdmdb	CD	L3+L4
5457922	0.000144523	37765126369	HSM67VH1	H4010	H4010C24_MBX	HSM67VH1	H4010	H4010C24	2015-06-05	30	ibdmdb	UC
3898956	0.00013608	28652017201	CSM7KOKZ	C3028	C3028C11_MBX	CSM7KOKZ	C3028	C3028C11	2015-06-05	15	ibdmdb	CD
26038410	0.000294337	88464716424	MSM79HCR	M2072	M2072C6_MBX	MSM79HCR	M2072	M2072C6	2015-06-09	9	ibdmdb	nonIBD
9564067	0.000123483	77452188372	HSM7CYYB	H4017	H4017C20_MBX	HSM7CYYB	H4017	H4017C20	2015-06-09	26	ibdmdb	CD	L3+L4
36800357	0.000739079	49792154369	CSM79HQR	C3034	C3034C1_MBX	CSM79HQR	C3034	C3034C1	2015-06-09	4	ibdmdb	UC
24566413	0.00056927	43154256833	HSM7J4QJ	H4015	H4015C23_MBX	HSM7J4QJ	H4015	H4015C23	2015-06-10	29	ibdmdb	CD	L3+L4
39705634	0.000841459	47186667139	CSM7KOPS	C3016	C3016C19_MBX	CSM7KOPS	C3016	C3016C19	2015-06-11	25	ibdmdb	CD
23038033	8.59e-05	268314000000	CSM7KOMT	C3011	C3011C23_MBX	CSM7KOMT	C3011	C3011C23	2015-06-12	29	ibdmdb	UC
6031422	2.19e-05	275561000000	PSM7J17X	P6018	P6018C9_MBX	PSM7J17X	P6018	P6018C9	2015-06-16	13	ibdmdb	nonIBD
6174410	0.000140823	43845301928	HSM7J4M4	H4019	H4019C19_MBX	HSM7J4M4	H4019	H4019C19	2015-06-16	25	ibdmdb	UC
2245534	6.35e-05	35382940583	PSM7J17L	P6016	P6016C9_MBX	PSM7J17L	P6016	P6016C9	2015-06-16	13	ibdmdb	CD	L3+L4
72188376	0.00179358	40248217556	HSM7J4LP	H4039	H4039C1_MBX	HSM7J4LP	H4039	H4039C1	2015-06-15	4	ibdmdb	CD	L3
6548917	0.000126248	51873394766	HSM7J4HS	H4035	H4035C5_MBX	HSM7J4HS	H4035	H4035C5	2015-06-16	8	ibdmdb	UC
31218664	0.000944866	33040297442	CSM7KOLE	C3010	C3010C24_MBX	CSM7KOLE	C3010	C3010C24	2015-06-16	30	ibdmdb	CD	L3
16097568	0.000411488	39120385451	CSM7KOP8	C3032	C3032C3_MBX	CSM7KOP8	C3032	C3032C3	2015-06-17	6	ibdmdb	UC
7457926	8.88e-05	83952383344	MSM79H9G	M2060	M2060C12_MBX	MSM79H9G	M2060	M2060C12	2015-06-17	16	ibdmdb	nonIBD
2137050	5.04e-05	42391742854	CSM7KOOV	C3027	C3027C14_MBX	CSM7KOOV	C3027	C3027C14	2015-06-17	19	ibdmdb	CD
3676934	9.84e-05	37350183337	ESM9IEP1	E5013	E5013C20_MBX	ESM9IEP1	E5013	E5013C20	2015-06-18	26	ibdmdb	CD	L1
7055186	6.67e-05	105698000000	PSM7J1DH	P6014	P6014C11_MBX	PSM7J1DH	P6014	P6014C11	2015-06-18	15	ibdmdb	nonIBD
885814	2.12e-05	41754730040	MSM79HAN	M2064	M2064C9_MBX	MSM79HAN	M2064	M2064C9	2015-06-18	13	ibdmdb	UC
8859860	0.000285477	31035314579	HSM7J4J7	H4038	H4038C2_MBX	HSM7J4J7	H4038	H4038C2	2015-06-23	5	ibdmdb	CD	L3
20141475	0.000303608	66340453075	CSM7KOQZ	C3017	C3017C20_MBX	CSM7KOQZ	C3017	C3017C20	2015-06-23	26	ibdmdb	CD	L3
5950944	9.78e-05	60841103406	CSM7KOPI	C3015	C3015C20_MBX	CSM7KOPI	C3015	C3015C20	2015-06-23	26	ibdmdb	UC
7190404	0.00011611	61927347399	MSM79HAH	M2039	M2039C24_MBX	MSM79HAH	M2039	M2039C24	2015-06-25	30	ibdmdb	nonIBD
23632992	0.000586316	40307593711	MSM79H6Y	M2048	M2048C15_MBX	MSM79H6Y	M2048	M2048C15	2015-06-26	20	ibdmdb	nonIBD
5434990	4.26e-05	127498000000	HSM7J4I7	H4024	H4024C17_MBX	HSM7J4I7	H4024	H4024C17	2015-07-01	22	ibdmdb	nonIBD
5604512	0.000124478	45024099200	PSM7J188	P6033	P6033C1_MBX	PSM7J188	P6033	P6033C1	2015-07-01	4	ibdmdb	CD	L3
2604121	6.2e-05	42023381306	HSM7J4MK	H4031	H4031C9_MBX	HSM7J4MK	H4031	H4031C9	2015-07-01	13	ibdmdb	CD	L1+L4
4184494	2.24e-05	186437000000	PSM7J17F	P6028	P6028C6_MBX	PSM7J17F	P6028	P6028C6	2015-07-07	9	ibdmdb	CD	L1+L4
33905698	2.48e-06	13686000000000	HSM7J4IU	H4022	H4022C19_MBX	HSM7J4IU	H4022	H4022C19	2015-07-07	25	ibdmdb	nonIBD
5716148	0.000140697	40627334239	MSM79H7Q	M2047	M2047C14_MBX	MSM79H7Q	M2047	M2047C14	2015-07-08	19	ibdmdb	nonIBD
60820440	0.00120888	50311458585	PSM7J193	P6013	P6013C14_MBX	PSM7J193	P6013	P6013C14	2015-07-09	19	ibdmdb	UC
173386025	0.00321177	53984513820	CSM7KOO9	C3031	C3031C10_MBX	CSM7KOO9	C3031	C3031C10	2015-07-10	14	ibdmdb	CD
9098949	0.000185204	49129400045	PSM7J12J	P6024	P6024C9_MBX	PSM7J12J	P6024	P6024C9	2015-07-14	13	ibdmdb	CD	L3+L4
3628032	6.99e-05	51873394766	HSM7J4JZ	H4035	H4035C7_MBX	HSM7J4JZ	H4035	H4035C7	2015-07-14	11	ibdmdb	UC
19288821	0.000476994	40438311573	CSM7KON8	C3012	C3012C24_MBX	CSM7KON8	C3012	C3012C24	2015-07-14	30	ibdmdb	CD	L1
4867859	0.000176211	27625100770	HSM7J4IC	H4032	H4032C10_MBX	HSM7J4IC	H4032	H4032C10	2015-07-15	14	ibdmdb	CD	L3+L4
14847557	0.000385097	38555381414	MSM9VZFJ	M2079	M2079C1_MBX	MSM9VZFJ	M2079	M2079C1	2015-07-15	4	ibdmdb	nonIBD
59658204	0.00122415	48734329407	CSM7KOSV	C3021	C3021C19_MBX	CSM7KOSV	C3021	C3021C19	2015-07-15	25	ibdmdb	CD	L2
7682683	0.000196386	39120385451	CSM7KOPC	C3032	C3032C5_MBX	CSM7KOPC	C3032	C3032C5	2015-07-15	8	ibdmdb	UC
1740172	5.04e-05	34549005060	HSM7J4JT	H4040	H4040C1_MBX	HSM7J4JT	H4040	H4040C1	2015-07-16	4	ibdmdb	UC
4733200	9.42e-05	50269862648	MSM79H8D	M2075	M2075C1_MBX	MSM79H8D	M2075	M2075C1	2015-07-17	4	ibdmdb	nonIBD
6354726	0.000144834	43875792727	HSM7J4QT	H4014	H4014C24_MBX	HSM7J4QT	H4014	H4014C24	2015-07-17	30	ibdmdb	CD	L3+L4
12035216	0.000272396	44182764091	HSM7J4MY	H4028	H4028C13_MBX	HSM7J4MY	H4028	H4028C13	2015-07-17	18	ibdmdb	CD	L1+L4
3530820	0.000102696	34381254411	HSM7J4L9	H4030	H4030C11_MBX	HSM7J4L9	H4030	H4030C11	2015-07-21	15	ibdmdb	CD	L1+L4
1616054	3.6e-05	44908660367	MSM9VZEK	M2068	M2068C9_MBX	MSM9VZEK	M2068	M2068C9	2015-07-21	13	ibdmdb	CD	L1
10181332	0.000173609	58645114432	CSM7KONK	C3023	C3023C18_MBX	CSM7KONK	C3023	C3023C18	2015-07-21	23	ibdmdb	CD	L3
89782275	0.00101489	88464716424	MSM79H85	M2072	M2072C9_MBX	MSM79H85	M2072	M2072C9	2015-07-21	13	ibdmdb	nonIBD
21967815	0.00026167	83952383344	MSM9VZF7	M2060	M2060C14_MBX	MSM9VZF7	M2060	M2060C14	2015-07-21	19	ibdmdb	nonIBD
7369674	0.000140485	52458902873	CSM79HQN	C3035	C3035C1_MBX	CSM79HQN	C3035	C3035C1	2015-07-21	4	ibdmdb	CD	L3
10308549	0.000305277	33767856784	MSM79H94	M2077	M2077C1_MBX	MSM79H94	M2077	M2077C1	2015-07-22	4	ibdmdb	nonIBD
4764591	0.000117697	40481797756	PSM7J12V	P6025	P6025C9_MBX	PSM7J12V	P6025	P6025C9	2015-07-22	13	ibdmdb	UC
7211455	0.000173388	41591481975	HSM7J4KC	H4023	H4023C19_MBX	HSM7J4KC	H4023	H4023C19	2015-07-23	25	ibdmdb	nonIBD
3399765	7.88e-05	43124018484	PSM7J1CU	P6009	P6009C19_MBX	PSM7J1CU	P6009	P6009C19	2015-07-28	25	ibdmdb	CD	L2
20850481	0.000568027	36706855932	MSM9VZEW	M2069	M2069C9_MBX	MSM9VZEW	M2069	M2069C9	2015-07-28	13	ibdmdb	UC
6575945	9.53e-05	68974735309	HSM7J4NE	H4027	H4027C14_MBX	HSM7J4NE	H4027	H4027C14	2015-07-28	19	ibdmdb	UC	L2+L4
9523507	9.12e-05	104384000000	HSM7J4KQ	H4016	H4016C24_MBX	HSM7J4KQ	H4016	H4016C24	2015-07-29	30	ibdmdb	nonIBD
4407336	0.000102365	43054927352	PSM7J136	P6005	P6005C20_MBX	PSM7J136	P6005	P6005C20	2015-07-29	26	ibdmdb	CD	L3+L4
24883607	0.000636078	39120385451	CSM7KOPE	C3032	C3032C6_MBX	CSM7KOPE	C3032	C3032C6	2015-07-29	9	ibdmdb	UC
8270364	5.47e-05	151150000000	MSM79HB6	M2041	M2041C24_MBX	MSM79HB6	M2041	M2041C24	2015-08-03	30	ibdmdb	nonIBD
9072122	7.19e-05	126245000000	HSM7J4LN	H4018	H4018C24_MBX	HSM7J4LN	H4018	H4018C24	2015-08-04	30	ibdmdb	nonIBD
7680645	0.000154254	49792154369	CSM7KORU	C3034	C3034C5_MBX	CSM7KORU	C3034	C3034C5	2015-08-04	8	ibdmdb	UC
29672094	0.000628824	47186667139	CSM7KOQ1	C3016	C3016C23_MBX	CSM7KOQ1	C3016	C3016C23	2015-08-04	29	ibdmdb	CD
7667685	9.53e-06	804625000000	CSM7KOOR	C3022	C3022C19_MBX	CSM7KOOR	C3022	C3022C19	2015-08-05	25	ibdmdb	nonIBD
7785519	0.000269993	28836052256	MSM9VZMM	M2084	M2084C1_MBX	MSM9VZMM	M2084	M2084C1	2015-08-10	4	ibdmdb	nonIBD
24631723	0.000638819	38558235652	CSM7KOQ7	C3037	C3037C1_MBX	CSM7KOQ7	C3037	C3037C1	2015-08-10	4	ibdmdb	UC
3060146	8.51e-05	35963516726	HSM7J4IS	H4020	H4020C23_MBX	HSM7J4IS	H4020	H4020C23	2015-08-11	29	ibdmdb	CD	L1+L4
5361707	0.000115689	46345955762	MSM9VZGO	M2061	M2061C14_MBX	MSM9VZGO	M2061	M2061C14	2015-08-12	19	ibdmdb	nonIBD
1533360	3.77e-05	40627334239	MSM79H7Y	M2047	M2047C19_MBX	MSM79H7Y	M2047	M2047C19	2015-08-17	25	ibdmdb	nonIBD
4071793	3.19e-05	127498000000	HSM7J4O1	H4024	H4024C19_MBX	HSM7J4O1	H4024	H4024C19	2015-08-17	25	ibdmdb	nonIBD
9882806	0.00022368	44182764091	HSM7J4N4	H4028	H4028C15_MBX	HSM7J4N4	H4028	H4028C15	2015-08-17	20	ibdmdb	CD	L1+L4
17336029	0.00055859	31035314579	HSM7J4JF	H4038	H4038C6_MBX	HSM7J4JF	H4038	H4038C6	2015-08-18	9	ibdmdb	CD	L3
3368881	7.68e-05	43845301928	HSM7J4ME	H4019	H4019C24_MBX	HSM7J4ME	H4019	H4019C24	2015-08-18	30	ibdmdb	UC
6554215	0.000107727	60841103406	CSM7KOPQ	C3015	C3015C24_MBX	CSM7KOPQ	C3015	C3015C24	2015-08-18	30	ibdmdb	UC
5219399	0.000155721	33517565739	MSM79H7M	M2071	M2071C4_MBX	MSM79H7M	M2071	M2071C4	2015-08-19	7	ibdmdb	UC
87432291	0.0018529	47186667139	CSM7KOQ3	C3016	C3016C24_MBX	CSM7KOQ3	C3016	C3016C24	2015-08-19	30	ibdmdb	CD
64718294	0.000975548	66340453075	CSM7KOR8	C3017	C3017C24_MBX	CSM7KOR8	C3017	C3017C24	2015-08-19	30	ibdmdb	CD	L3
16144478	0.000379132	42582693020	HSM7J4JV	H4042	H4042C1_MBX	HSM7J4JV	H4042	H4042C1	2015-08-24	4	ibdmdb	UC
5655821	0.000135732	41669178888	MSM9VZM4	M2085	M2085C1_MBX	MSM9VZM4	M2085	M2085C1	2015-08-25	4	ibdmdb	CD	L1
28471316	0.00103063	27625100770	HSM7J4OZ	H4032	H4032C13_MBX	HSM7J4OZ	H4032	H4032C13	2015-08-25	18	ibdmdb	CD	L3+L4
51991344	0.000623655	83365545089	CSM7KOSP	C3030	C3030C15_MBX	CSM7KOSP	C3030	C3030C15	2015-08-25	20	ibdmdb	CD	L2
3095250	6.16e-05	50269862648	MSM79H8J	M2075	M2075C4_MBX	MSM79H8J	M2075	M2075C4	2015-08-25	7	ibdmdb	nonIBD
10377303	0.000293285	35382940583	PSM7J158	P6016	P6016C14_MBX	PSM7J158	P6016	P6016C14	2015-08-26	19	ibdmdb	CD	L3+L4
3753060	2.94e-05	127498000000	HSM7J4O3	H4024	H4024C21_MBX	HSM7J4O3	H4024	H4024C21	2015-08-26	27	ibdmdb	nonIBD
8342735	0.000213258	39120385451	CSM7KOU9	C3032	C3032C8_MBX	CSM7KOU9	C3032	C3032C8	2015-08-26	12	ibdmdb	UC
23622104	0.000223487	105698000000	PSM7J14X	P6014	P6014C14_MBX	PSM7J14X	P6014	P6014C14	2015-09-01	19	ibdmdb	nonIBD
3786764	0.000132164	28652017201	CSM7KORK	C3028	C3028C15_MBX	CSM7KORK	C3028	C3028C15	2015-09-04	20	ibdmdb	CD
39537627	0.00102548	38555381414	MSM9VZFR	M2079	M2079C5_MBX	MSM9VZFR	M2079	M2079C5	2015-09-09	8	ibdmdb	nonIBD
3279226	7.8e-05	42023381306	HSM7J4OE	H4031	H4031C14_MBX	HSM7J4OE	H4031	H4031C14	2015-09-09	19	ibdmdb	CD	L1+L4
11134922	4.04e-05	275561000000	PSM7J15M	P6018	P6018C15_MBX	PSM7J15M	P6018	P6018C15	2015-09-09	20	ibdmdb	nonIBD
4359288	9.72e-05	44847143013	PSM7J14L	P6010	P6010C20_MBX	PSM7J14L	P6010	P6010C20	2015-09-09	26	ibdmdb	CD	L3+L4
5231491	0.000100851	51873394766	HSM7J4K8	H4035	H4035C11_MBX	HSM7J4K8	H4035	H4035C11	2015-09-09	15	ibdmdb	UC
48512140	0.00125815	38558235652	CSM7KOUL	C3037	C3037C3_MBX	CSM7KOUL	C3037	C3037C3	2015-09-09	6	ibdmdb	UC
21920680	0.000446183	49129400045	PSM7J12R	P6024	P6024C13_MBX	PSM7J12R	P6024	P6024C13	2015-09-10	18	ibdmdb	CD	L3+L4
4002050	9.44e-05	42391742854	CSMA9J65	C3027	C3027C19_MBX	CSMA9J65	C3027	C3027C19	2015-09-10	25	ibdmdb	CD
4712274	0.000112856	41754730040	MSM9VZLP	M2064	M2064C14_MBX	MSM9VZLP	M2064	M2064C14	2015-09-14	19	ibdmdb	UC
2059278	4.59e-05	44908660367	MSM9VZES	M2068	M2068C13_MBX	MSM9VZES	M2068	M2068C13	2015-09-15	18	ibdmdb	CD	L1
74501842	0.00148081	50311458585	PSM7J12F	P6013	P6013C19_MBX	PSM7J12F	P6013	P6013C19	2015-09-15	25	ibdmdb	UC
24139631	0.000720208	33517565739	MSM79H7G	M2071	M2071C6_MBX	MSM79H7G	M2071	M2071C6	2015-09-16	9	ibdmdb	UC
6227114	0.000149721	41591481975	HSM7J4KK	H4023	H4023C23_MBX	HSM7J4KK	H4023	H4023C23	2015-09-16	29	ibdmdb	nonIBD
23777087	0.000445538	53367087493	HSM7J4JW	H4043	H4043C1_MBX	HSM7J4JW	H4043	H4043C1	2015-09-22	4	ibdmdb	CD	L3
8304981	0.000192893	43054927352	PSM7J13E	P6005	P6005C24_MBX	PSM7J13E	P6005	P6005C24	2015-09-22	30	ibdmdb	CD	L3+L4
1592459	3.69e-05	43124018484	PSM7J141	P6009	P6009C23_MBX	PSM7J141	P6009	P6009C23	2015-09-22	29	ibdmdb	CD	L2
13364164	0.000319993	41763987456	PSM7J16Y	P6017	P6017C12_MBX	PSM7J16Y	P6017	P6017C12	2015-09-22	16	ibdmdb	nonIBD
4085506	0.000118252	34549005060	HSM7J4NU	H4040	H4040C5_MBX	HSM7J4NU	H4040	H4040C5	2015-09-23	8	ibdmdb	UC
36121146	0.00062135	58133301487	HSMA33NW	H4044	H4044C1_MBX	HSMA33NW	H4044	H4044C1	2015-09-23	4	ibdmdb	UC
21783641	0.000493035	44182764091	HSM7J4NA	H4028	H4028C18_MBX	HSM7J4NA	H4028	H4028C18	2015-09-24	23	ibdmdb	CD	L1+L4
9160825	0.00021513	42582693020	HSMA33MZ	H4042	H4042C3_MBX	HSMA33MZ	H4042	H4042C3	2015-09-24	6	ibdmdb	UC
2126456	5.23e-05	40627334239	MSM9VZNL	M2047	M2047C22_MBX	MSM9VZNL	M2047	M2047C22	2015-09-28	28	ibdmdb	nonIBD
14570573	0.000431492	33767856784	MSM9VZME	M2077	M2077C3_MBX	MSM9VZME	M2077	M2077C3	2015-09-29	6	ibdmdb	nonIBD
31715511	0.00035851	88464716424	MSM9VZOI	M2072	M2072C14_MBX	MSM9VZOI	M2072	M2072C14	2015-09-29	19	ibdmdb	nonIBD
2089858	4.2e-05	49792154369	CSM9X1XW	C3034	C3034C9_MBX	CSM9X1XW	C3034	C3034C9	2015-09-30	13	ibdmdb	UC
22663361	0.000328575	68974735309	HSMA33O1	H4027	H4027C19_MBX	HSMA33O1	H4027	H4027C19	2015-10-06	25	ibdmdb	UC	L2+L4
16960723	0.000588178	28836052256	MSM9VZMU	M2084	M2084C5_MBX	MSM9VZMU	M2084	M2084C5	2015-10-06	8	ibdmdb	nonIBD
4671031	0.000115386	40481797756	PSM7J134	P6025	P6025C13_MBX	PSM7J134	P6025	P6025C13	2015-10-06	18	ibdmdb	UC
2411447	5.2e-05	46345955762	MSM9VZLJ	M2061	M2061C18_MBX	MSM9VZLJ	M2061	M2061C18	2015-10-06	23	ibdmdb	nonIBD
2893332	1.55e-05	186437000000	PSM7J161	P6028	P6028C10_MBX	PSM7J161	P6028	P6028C10	2015-10-07	14	ibdmdb	CD	L1+L4
32230129	0.000961978	33504010821	CSM9X1Y5	C3029	C3029C19_MBX	CSM9X1Y5	C3029	C3029C19	2015-10-07	25	ibdmdb	UC
8979871	0.000229545	39120385451	CSM7KOUF	C3032	C3032C11_MBX	CSM7KOUF	C3032	C3032C11	2015-10-07	15	ibdmdb	UC
20599801	0.000599158	34381254411	HSM7J4OT	H4030	H4030C16_MBX	HSM7J4OT	H4030	H4030C16	2015-10-08	21	ibdmdb	CD	L1+L4
24217368	0.000127421	190058000000	MSM9VZNX	M2083	M2083C4_MBX	MSM9VZNX	M2083	M2083C4	2015-10-13	7	ibdmdb	UC
9471265	0.000180546	52458902873	CSM7KOTU	C3035	C3035C6_MBX	CSM7KOTU	C3035	C3035C6	2015-10-13	9	ibdmdb	CD	L3
5994940	0.000102224	58645114432	CSM7KOTK	C3023	C3023C24_MBX	CSM7KOTK	C3023	C3023C24	2015-10-13	30	ibdmdb	CD	L3
16551977	0.000306606	53984513820	CSM7KOOF	C3031	C3031C12_MBX	CSM7KOOF	C3031	C3031C12	2015-10-13	16	ibdmdb	CD
4158782	9.98e-05	41669178888	MSM9VZPL	M2085	M2085C4_MBX	MSM9VZPL	M2085	M2085C4	2015-10-14	7	ibdmdb	CD	L1
3348422	4.16e-06	804625000000	CSMAG78W	C3022	C3022C23_MBX	CSMAG78W	C3022	C3022C23	2015-10-15	29	ibdmdb	nonIBD
4752622	9.16e-05	51873394766	HSMA33OR	H4035	H4035C14_MBX	HSMA33OR	H4035	H4035C14	2015-10-20	19	ibdmdb	UC
8034483	0.000178449	45024099200	PSMA2651	P6033	P6033C8_MBX	PSMA2651	P6033	P6033C8	2015-10-20	12	ibdmdb	CD	L3
5499805	6.55e-05	83952383344	MSM9VZPV	M2060	M2060C21_MBX	MSM9VZPV	M2060	M2060C21	2015-10-20	27	ibdmdb	nonIBD
7149679	0.00017764	40248217556	HSMA33NQ	H4039	H4039C10_MBX	HSMA33NQ	H4039	H4039C10	2015-10-20	14	ibdmdb	CD	L3
4749330	0.000113744	41754730040	MSM9VZLV	M2064	M2064C16_MBX	MSM9VZLV	M2064	M2064C16	2015-10-20	21	ibdmdb	UC
189328311	0.00515785	36706855932	MSM9VZOU	M2069	M2069C15_MBX	MSM9VZOU	M2069	M2069C15	2015-10-20	20	ibdmdb	UC
178428265	0.0046275	38558235652	CSM7KOUR	C3037	C3037C6_MBX	CSM7KOUR	C3037	C3037C6	2015-10-20	9	ibdmdb	UC
5326078	7.18e-05	74195026798	HSMA33NY	H4045	H4045C1_MBX	HSMA33NY	H4045	H4045C1	2015-10-23	4	ibdmdb	nonIBD
67727609	0.000640765	105698000000	PSM7J156	P6014	P6014C17_MBX	PSM7J156	P6014	P6014C17	2015-10-27	22	ibdmdb	nonIBD
3532342	0.000113817	31035314579	HSMA33NG	H4038	H4038C11_MBX	HSMA33NG	H4038	H4038C11	2015-10-27	15	ibdmdb	CD	L3
2909207	5.79e-05	50269862648	MSM9VZJZ	M2075	M2075C9_MBX	MSM9VZJZ	M2075	M2075C9	2015-10-29	13	ibdmdb	nonIBD
4691409	0.000104609	44847143013	PSM7J14T	P6010	P6010C24_MBX	PSM7J14T	P6010	P6010C24	2015-11-03	30	ibdmdb	CD	L3+L4
3988617	1.45e-05	275561000000	PSM7J15U	P6018	P6018C19_MBX	PSM7J15U	P6018	P6018C19	2015-11-03	25	ibdmdb	nonIBD
6653798	6.16e-05	107929000000	PSMA264Q	P6035	P6035C3_MBX	PSMA264Q	P6035	P6035C3	2015-11-03	6	ibdmdb	UC
7430926	0.000175292	42391742854	CSMAIG7X	C3027	C3027C24_MBX	CSMAIG7X	C3027	C3027C24	2015-11-03	30	ibdmdb	CD
10661235	0.000154567	68974735309	HSMA33O5	H4027	H4027C21_MBX	HSMA33O5	H4027	H4027C21	2015-11-04	27	ibdmdb	UC	L2+L4
4699079	5.31e-05	88464716424	MSM9VZOO	M2072	M2072C17_MBX	MSM9VZOO	M2072	M2072C17	2015-11-09	22	ibdmdb	nonIBD
3922173	7.48e-05	52458902873	CSM9X1YV	C3035	C3035C8_MBX	CSM9X1YV	C3035	C3035C8	2015-11-10	12	ibdmdb	CD	L3
5147945	0.000135941	37868973613	PSMA265X	P6038	P6038C1_MBX	PSMA265X	P6038	P6038C1	2015-11-12	4	ibdmdb	UC
252728358	0.00882061	28652017201	CSM9X21B	C3028	C3028C18_MBX	CSM9X21B	C3028	C3028C18	2015-11-12	23	ibdmdb	CD
13010498	0.000451189	28836052256	MSM9VZL9	M2084	M2084C8_MBX	MSM9VZL9	M2084	M2084C8	2015-11-17	12	ibdmdb	nonIBD
5809869	3.12e-05	186437000000	PSM7J167	P6028	P6028C13_MBX	PSM7J167	P6028	P6028C13	2015-11-17	18	ibdmdb	CD	L1+L4
6855180	0.000177801	38555381414	MSM9VZKE	M2079	M2079C9_MBX	MSM9VZKE	M2079	M2079C9	2015-11-17	13	ibdmdb	nonIBD
2341127	6.62e-05	35382940583	PSMA265N	P6016	P6016C20_MBX	PSMA265N	P6016	P6016C20	2015-11-17	26	ibdmdb	CD	L3+L4
5297741	0.000126067	42023381306	HSMA33JB	H4031	H4031C19_MBX	HSMA33JB	H4031	H4031C19	2015-11-17	25	ibdmdb	CD	L1+L4
13517132	0.000350564	38558235652	CSM9X213	C3037	C3037C8_MBX	CSM9X213	C3037	C3037C8	2015-11-17	12	ibdmdb	UC
12307890	0.000357983	34381254411	HSMA33K2	H4030	H4030C20_MBX	HSMA33K2	H4030	H4030C20	2015-11-24	26	ibdmdb	CD	L1+L4
131303771	0.00475306	27625100770	HSMA33JP	H4032	H4032C20_MBX	HSMA33JP	H4032	H4032C20	2015-12-01	26	ibdmdb	CD	L3+L4
5199128	0.000112181	46345955762	MSM9VZHB	M2061	M2061C21_MBX	MSM9VZHB	M2061	M2061C21	2015-12-01	27	ibdmdb	nonIBD
12598161	0.000163626	76993492607	PSMA266I	P6037	P6037C2_MBX	PSMA266I	P6037	P6037C2	2015-12-01	5	ibdmdb	CD	L3
9425952	0.000127043	74195026798	HSMA33J5	H4045	H4045C4_MBX	HSMA33J5	H4045	H4045C4	2015-12-03	7	ibdmdb	nonIBD
6338359	3.33e-05	190058000000	MSM9VZIM	M2083	M2083C7_MBX	MSM9VZIM	M2083	M2083C7	2015-12-03	11	ibdmdb	UC
6118670	2.33e-05	262254000000	MSMA267V	M2103	M2103C2_MBX	MSMA267V	M2103	M2103C2	2015-12-15	5	ibdmdb	UC
7220673	0.000139198	51873394766	HSMA33OZ	H4035	H4035C18_MBX	HSMA33OZ	H4035	H4035C18	2015-12-15	23	ibdmdb	UC
7052948	0.000192143	36706855932	MSM9VZP3	M2069	M2069C19_MBX	MSM9VZP3	M2069	M2069C19	2015-12-15	25	ibdmdb	UC
175784854	0.003578	49129400045	PSMA263W	P6024	P6024C19_MBX	PSMA263W	P6024	P6024C19	2015-12-16	25	ibdmdb	CD	L3+L4
23498635	0.000440321	53367087493	HSMA33LL	H4043	H4043C7_MBX	HSMA33LL	H4043	H4043C7	2015-12-16	11	ibdmdb	CD	L3
61187652	0.00181201	33767856784	MSM9VZHX	M2077	M2077C9_MBX	MSM9VZHX	M2077	M2077C9	2015-12-18	13	ibdmdb	nonIBD
7604613	0.000220111	34549005060	HSMA33OJ	H4040	H4040C13_MBX	HSMA33OJ	H4040	H4040C13	2015-12-23	18	ibdmdb	UC
22790595	0.000546941	41669178888	MSM9VZJ3	M2085	M2085C10_MBX	MSM9VZJ3	M2085	M2085C10	2016-01-05	14	ibdmdb	CD	L1
12789264	6.73e-05	190058000000	MSM9VZIQ	M2083	M2083C9_MBX	MSM9VZIQ	M2083	M2083C9	2016-01-05	13	ibdmdb	UC
2062225	4.59e-05	44908660367	MSMA26AL	M2068	M2068C20_MBX	MSMA26AL	M2068	M2068C20	2016-01-05	26	ibdmdb	CD	L1
4185316	0.000118286	35382940583	PSMA265T	P6016	P6016C23_MBX	PSMA265T	P6016	P6016C23	2016-01-05	29	ibdmdb	CD	L3+L4
2236256	4.83e-05	46345955762	MSM9VZHF	M2061	M2061C23_MBX	MSM9VZHF	M2061	M2061C23	2016-01-05	29	ibdmdb	nonIBD
3392834	8.07e-05	42023381306	HSMA33JH	H4031	H4031C22_MBX	HSMA33JH	H4031	H4031C22	2016-01-06	28	ibdmdb	CD	L1+L4
3561582	4.8e-05	74195026798	HSMA33J9	H4045	H4045C6_MBX	HSMA33J9	H4045	H4045C6	2016-01-07	9	ibdmdb	nonIBD
3448150	1.25e-05	275561000000	PSMA265H	P6018	P6018C24_MBX	PSMA265H	P6018	P6018C24	2016-01-12	30	ibdmdb	nonIBD
13172634	0.00034163	38558235652	CSM9X211	C3037	C3037C11_MBX	CSM9X211	C3037	C3037C11	2016-01-12	15	ibdmdb	UC
16909974	0.000156677	107929000000	PSMA267J	P6035	P6035C8_MBX	PSMA267J	P6035	P6035C8	2016-01-19	12	ibdmdb	UC
96901964	0.000314265	308345000000	MSMA26DG	M2097	M2097C3_MBX	MSMA26DG	M2097	M2097C3	2016-01-20	6	ibdmdb	nonIBD
14637827	0.000398776	36706855932	MSMA26EJ	M2069	M2069C21_MBX	MSMA26EJ	M2069	M2069C21	2016-01-20	27	ibdmdb	UC
6076725	3.26e-05	186437000000	PSMA266C	P6028	P6028C17_MBX	PSMA266C	P6028	P6028C17	2016-01-21	22	ibdmdb	CD	L1+L4
25130981	0.000749785	33517565739	MSMA26AZ	M2071	M2071C8_MBX	MSMA26AZ	M2071	M2071C8	2016-01-27	12	ibdmdb	UC
6452205	0.000154492	41763987456	PSMA2646	P6017	P6017C19_MBX	PSMA2646	P6017	P6017C19	2016-01-28	25	ibdmdb	nonIBD
7059280	7.98e-05	88464716424	MSM9VZHR	M2072	M2072C23_MBX	MSM9VZHR	M2072	M2072C23	2016-02-01	29	ibdmdb	nonIBD
10998172	0.000381404	28836052256	MSMA26BB	M2084	M2084C13_MBX	MSMA26BB	M2084	M2084C13	2016-02-02	18	ibdmdb	nonIBD
47085395	0.000945639	49792154369	CSM9X21J	C3034	C3034C15_MBX	CSM9X21J	C3034	C3034C15	2016-02-02	20	ibdmdb	UC
6211289	8.07e-05	76993492607	PSMA266Q	P6037	P6037C6_MBX	PSMA266Q	P6037	P6037C6	2016-02-02	9	ibdmdb	CD	L3
4989888	9.93e-05	50269862648	MSM9VZH1	M2075	M2075C15_MBX	MSM9VZH1	M2075	M2075C15	2016-02-02	20	ibdmdb	nonIBD
18461430	0.000594852	31035314579	HSMA33KM	H4038	H4038C18_MBX	HSMA33KM	H4038	H4038C18	2016-02-04	23	ibdmdb	CD	L3
19820557	0.000506655	39120385451	CSM9X22G	C3032	C3032C19_MBX	CSM9X22G	C3032	C3032C19	2016-02-08	25	ibdmdb	UC
21509863	0.000398445	53984513820	CSM9X1ZC	C3031	C3031C15_MBX	CSM9X1ZC	C3031	C3031C15	2016-02-08	20	ibdmdb	CD
10791080	3.5e-05	308345000000	MSMA26DO	M2097	M2097C5_MBX	MSMA26DO	M2097	M2097C5	2016-02-09	8	ibdmdb	nonIBD
14919146	0.000370678	40248217556	HSMA33L1	H4039	H4039C18_MBX	HSMA33L1	H4039	H4039C18	2016-02-09	23	ibdmdb	CD	L3
26883426	0.000643841	41754730040	MSMA26ET	M2064	M2064C21_MBX	MSMA26ET	M2064	M2064C21	2016-02-11	27	ibdmdb	UC
8863730	0.000196866	45024099200	PSMA267B	P6033	P6033C16_MBX	PSMA267B	P6033	P6033C16	2016-02-16	21	ibdmdb	CD	L3
4858592	0.0001283	37868973613	PSMA2675	P6038	P6038C7_MBX	PSMA2675	P6038	P6038C7	2016-02-17	11	ibdmdb	UC
9024395	0.00017397	51873394766	HSMA33MI	H4035	H4035C23_MBX	HSMA33MI	H4035	H4035C23	2016-02-23	29	ibdmdb	UC
22927197	0.000429613	53367087493	HSMA33LV	H4043	H4043C11_MBX	HSMA33LV	H4043	H4043C11	2016-02-23	15	ibdmdb	CD	L3
3916373	0.000101578	38555381414	MSMA26BR	M2079	M2079C14_MBX	MSMA26BR	M2079	M2079C14	2016-02-24	19	ibdmdb	nonIBD
3809739	9.14e-05	41669178888	MSMA26CX	M2085	M2085C12_MBX	MSMA26CX	M2085	M2085C12	2016-02-24	16	ibdmdb	CD	L1
34129946	0.00101072	33767856784	MSM9VZI6	M2077	M2077C13_MBX	MSM9VZI6	M2077	M2077C13	2016-02-29	18	ibdmdb	nonIBD
20030953	0.000185594	107929000000	PSMA267P	P6035	P6035C11_MBX	PSMA267P	P6035	P6035C11	2016-03-15	15	ibdmdb	UC
12805207	0.000257173	49792154369	CSM9X21P	C3034	C3034C18_MBX	CSM9X21P	C3034	C3034C18	2016-03-15	23	ibdmdb	UC
21917823	0.000284671	76993492607	PSMA269I	P6037	P6037C9_MBX	PSMA269I	P6037	P6037C9	2016-03-16	13	ibdmdb	CD	L3
32574257	0.000809334	40248217556	HSMA33PP	H4039	H4039C21_MBX	HSMA33PP	H4039	H4039C21	2016-03-22	27	ibdmdb	CD	L3
9725491	0.000313369	31035314579	HSMA33PZ	H4038	H4038C21_MBX	HSMA33PZ	H4038	H4038C21	2016-03-22	27	ibdmdb	CD	L3
107592128	0.00205642	52320204001	MSM5LLDI	M2008	M2008C1_MBX	MSM5LLDI	M2008	M2008C1	2013-12-11	4	ibdmdb	CD
5274471	0.000139282	37868973613	PSMA269W	P6038	P6038C10_MBX	PSMA269W	P6038	P6038C10	2016-04-01	14	ibdmdb	UC
11064352	0.000259832	42582693020	HSMA33IY	H4042	H4042C17_MBX	HSMA33IY	H4042	H4042C17	2016-04-05	22	ibdmdb	UC
3470789	8.87e-05	39120385451	CSM9X22Q	C3032	C3032C24_MBX	CSM9X22Q	C3032	C3032C24	2016-04-02	30	ibdmdb	UC
9263166	0.000184269	50269862648	MSMAPC7J	M2075	M2075C19_MBX	MSMAPC7J	M2075	M2075C19	2016-04-06	25	ibdmdb	nonIBD
65017904	0.00168623	38558235652	CSM9X22U	C3037	C3037C17_MBX	CSM9X22U	C3037	C3037C17	2016-04-06	22	ibdmdb	UC
6241164	2.02e-05	308345000000	MSMAPC5F	M2097	M2097C8_MBX	MSMAPC5F	M2097	M2097C8	2016-04-07	12	ibdmdb	nonIBD
2029845	2.74e-05	74195026798	HSMA33QO	H4045	H4045C14_MBX	HSMA33QO	H4045	H4045C14	2016-04-19	19	ibdmdb	nonIBD
6687718	0.00019805	33767856784	MSMAPC7T	M2077	M2077C16_MBX	MSMAPC7T	M2077	M2077C16	2016-04-21	21	ibdmdb	nonIBD
2313340	8.82e-06	262254000000	MSMAPC62	M2103	M2103C9_MBX	MSMAPC62	M2103	M2103C9	2016-04-25	13	ibdmdb	UC
4302286	2.31e-05	186437000000	PSMA269E	P6028	P6028C24_MBX	PSMA269E	P6028	P6028C24	2016-04-26	30	ibdmdb	CD	L1+L4
7183813	0.000159555	45024099200	PSMA26AJ	P6033	P6033C21_MBX	PSMA26AJ	P6033	P6033C21	2016-04-26	27	ibdmdb	CD	L3
2355205	8.17e-05	28836052256	MSMAPC6K	M2084	M2084C19_MBX	MSMAPC6K	M2084	M2084C19	2016-04-27	25	ibdmdb	nonIBD
3360488	8.06e-05	41669178888	MSMAPC6G	M2085	M2085C17_MBX	MSMAPC6G	M2085	M2085C17	2016-05-03	22	ibdmdb	CD	L1
8368611	0.000159527	52458902873	CSM9X237	C3035	C3035C20_MBX	CSM9X237	C3035	C3035C20	2016-05-05	26	ibdmdb	CD	L3
12441644	0.000233133	53367087493	HSMA33R7	H4043	H4043C17_MBX	HSMA33R7	H4043	H4043C17	2016-05-10	22	ibdmdb	CD	L3
33661973	0.00108464	31035314579	HSMA33Q6	H4038	H4038C24_MBX	HSMA33Q6	H4038	H4038C24	2016-05-11	30	ibdmdb	CD	L3
23934025	0.000632022	37868973613	PSMA26A3	P6038	P6038C13_MBX	PSMA26A3	P6038	P6038C13	2016-05-12	18	ibdmdb	UC
3341080	9.67e-05	34549005060	HSMA33M8	H4040	H4040C23_MBX	HSMA33M8	H4040	H4040C23	2016-05-23	29	ibdmdb	UC
33862405	0.000634519	53367087493	HSMA33R9	H4043	H4043C19_MBX	HSMA33R9	H4043	H4043C19	2016-05-26	25	ibdmdb	CD	L3
4111384	7.84e-05	52458902873	CSM9X23B	C3035	C3035C22_MBX	CSM9X23B	C3035	C3035C22	2016-05-26	28	ibdmdb	CD	L3
28723765	0.000689329	41669178888	MSMB4LXY	M2085	M2085C19_MBX	MSMB4LXY	M2085	M2085C19	2016-06-01	25	ibdmdb	CD	L1
11780201	0.000109148	107929000000	PSMB4MBK	P6035	P6035C16_MBX	PSMB4MBK	P6035	P6035C16	2016-06-01	21	ibdmdb	UC
78251345	0.00202943	38558235652	CSM9X23L	C3037	C3037C20_MBX	CSM9X23L	C3037	C3037C20	2016-06-02	26	ibdmdb	UC
10434361	0.000135523	76993492607	PSMB4MBQ	P6037	P6037C15_MBX	PSMB4MBQ	P6037	P6037C15	2016-06-15	20	ibdmdb	CD	L3
10678835	3.46e-05	308345000000	MSMB4LXW	M2097	M2097C15_MBX	MSMB4LXW	M2097	M2097C15	2016-06-22	20	ibdmdb	nonIBD
9018252	4.74e-05	190058000000	MSMAPC5D	M2083	M2083C17_MBX	MSMAPC5D	M2083	M2083C17	2016-06-24	22	ibdmdb	UC
6689142	0.000173482	38558235652	CSM9X23P	C3037	C3037C22_MBX	CSM9X23P	C3037	C3037C22	2016-06-28	28	ibdmdb	UC
1722925	2.32e-05	74195026798	HSMA33SG	H4045	H4045C19_MBX	HSMA33SG	H4045	H4045C19	2016-06-29	25	ibdmdb	nonIBD
31667468	0.000944802	33517565739	MSMB4LZ4	M2071	M2071C12_MBX	MSMB4LZ4	M2071	M2071C12	2016-07-06	16	ibdmdb	UC
30650320	0.00106292	28836052256	MSMB4LZX	M2084	M2084C24_MBX	MSMB4LZX	M2084	M2084C24	2016-07-06	30	ibdmdb	nonIBD
2978235	5.92e-05	50269862648	MSMAPC7D	M2075	M2075C24_MBX	MSMAPC7D	M2075	M2075C24	2016-07-12	30	ibdmdb	nonIBD
3486099	0.000103237	33767856784	MSMB4LZC	M2077	M2077C21_MBX	MSMB4LZC	M2077	M2077C21	2016-07-15	27	ibdmdb	nonIBD
17244875	9.07e-05	190058000000	MSMB4LZR	M2083	M2083C19_MBX	MSMB4LZR	M2083	M2083C19	2016-07-21	25	ibdmdb	UC
24200248	0.000627675	38555381414	MSMB4LZ8	M2079	M2079C21_MBX	MSMB4LZ8	M2079	M2079C21	2016-08-22	27	ibdmdb	nonIBD
1801183	2.43e-05	74195026798	HSMA33SK	H4045	H4045C21_MBX	HSMA33SK	H4045	H4045C21	2016-07-27	27	ibdmdb	nonIBD
2338047	8.92e-06	262254000000	MSMB4LYH	M2103	M2103C14_MBX	MSMB4LYH	M2103	M2103C14	2016-08-02	19	ibdmdb	UC
6243371	0.000164868	37868973613	PSMB4MC5	P6038	P6038C19_MBX	PSMB4MC5	P6038	P6038C19	2016-08-03	25	ibdmdb	UC
5537186	9.52e-05	58133301487	HSMA33RX	H4044	H4044C21_MBX	HSMA33RX	H4044	H4044C21	2016-08-04	27	ibdmdb	UC
11863830	0.000278607	42582693020	HSMA33RL	H4042	H4042C23_MBX	HSMA33RL	H4042	H4042C23	2016-08-05	29	ibdmdb	UC
1774399	4.26e-05	41669178888	MSMB4LYB	M2085	M2085C21_MBX	MSMB4LYB	M2085	M2085C21	2016-08-10	28	ibdmdb	CD	L1
7273012	2.36e-05	308345000000	MSMB4LZK	M2097	M2097C17_MBX	MSMB4LZK	M2097	M2097C17	2016-08-11	22	ibdmdb	nonIBD

## Sheet: related to panels B and C
Study	Assay	Phenotype	enzyme	subject	RPKM
Crohn's Disease	MTG	Crohn's Disease	oxdd	C2086	0.0308707
Crohn's Disease	MTG	Crohn's Disease	oxdd	C3010	0.153315
Crohn's Disease	MTG	Crohn's Disease	oxdd	C3021	0.0734636
Crohn's Disease	MTG	Crohn's Disease	oxdd	C3031	0.0829698
Crohn's Disease	MTG	Crohn's Disease	oxdd	E5003	0.0451129
Crohn's Disease	MTG	Crohn's Disease	oxdd	E5009	0.0828116
Crohn's Disease	MTG	Crohn's Disease	oxdd	E5013	0.0450525
Crohn's Disease	MTG	Crohn's Disease	oxdd	H4001	0.0297954
Crohn's Disease	MTG	Crohn's Disease	oxdd	H4015	0.188942
Crohn's Disease	MTG	Crohn's Disease	oxdd	H4017	0.0508758
Crohn's Disease	MTG	Crohn's Disease	oxdd	H4039	0.102187
Crohn's Disease	MTG	Crohn's Disease	oxdd	M2014	0.050971
Crohn's Disease	MTG	Crohn's Disease	oxdd	M2028	0.0601357
Crohn's Disease	MTG	Crohn's Disease	oxdd	P6028	0.0664057
Crohn's Disease	MTG	Crohn's Disease	frc	C2014	0.462401
Crohn's Disease	MTG	Crohn's Disease	frc	C2034	18.4463
Crohn's Disease	MTG	Crohn's Disease	frc	C2058	0.0462924
Crohn's Disease	MTG	Crohn's Disease	frc	C2086	9.43565
Crohn's Disease	MTG	Crohn's Disease	frc	C3001	1.92934
Crohn's Disease	MTG	Crohn's Disease	frc	C3002	1.17124
Crohn's Disease	MTG	Crohn's Disease	frc	C3007	15.4355
Crohn's Disease	MTG	Crohn's Disease	frc	C3008	0.150322
Crohn's Disease	MTG	Crohn's Disease	frc	C3009	24.5822
Crohn's Disease	MTG	Crohn's Disease	frc	C3010	4.53878
Crohn's Disease	MTG	Crohn's Disease	frc	C3012	0.684377
Crohn's Disease	MTG	Crohn's Disease	frc	C3016	1.33323
Crohn's Disease	MTG	Crohn's Disease	frc	C3017	14.4123
Crohn's Disease	MTG	Crohn's Disease	frc	C3019	0.643536
Crohn's Disease	MTG	Crohn's Disease	frc	C3020	37.2556
Crohn's Disease	MTG	Crohn's Disease	frc	C3021	6.67754
Crohn's Disease	MTG	Crohn's Disease	frc	C3023	2.32546
Crohn's Disease	MTG	Crohn's Disease	frc	C3027	0.374898
Crohn's Disease	MTG	Crohn's Disease	frc	C3028	2.23421
Crohn's Disease	MTG	Crohn's Disease	frc	C3030	16.6587
Crohn's Disease	MTG	Crohn's Disease	frc	C3031	0.690856
Crohn's Disease	MTG	Crohn's Disease	frc	C3033	33.3353
Crohn's Disease	MTG	Crohn's Disease	frc	C3035	2.27135
Crohn's Disease	MTG	Crohn's Disease	frc	C4006	4.58294
Crohn's Disease	MTG	Crohn's Disease	frc	C4015	0.801612
Crohn's Disease	MTG	Crohn's Disease	frc	C4020	0.0391451
Crohn's Disease	MTG	Crohn's Disease	frc	C4028	0.967095
Crohn's Disease	MTG	Crohn's Disease	frc	C4030	1.58287
Crohn's Disease	MTG	Crohn's Disease	frc	C5001	0.458646
Crohn's Disease	MTG	Crohn's Disease	frc	C5009	0.121412
Crohn's Disease	MTG	Crohn's Disease	frc	C5019	0.76604
Crohn's Disease	MTG	Crohn's Disease	frc	C5023	7.89639
Crohn's Disease	MTG	Crohn's Disease	frc	C6009	2.54346
Crohn's Disease	MTG	Crohn's Disease	frc	C6010	0.111477
Crohn's Disease	MTG	Crohn's Disease	frc	C6028	31.3121
Crohn's Disease	MTG	Crohn's Disease	frc	E5001	0.936772
Crohn's Disease	MTG	Crohn's Disease	frc	E5003	0.616327
Crohn's Disease	MTG	Crohn's Disease	frc	E5006	2.52168
Crohn's Disease	MTG	Crohn's Disease	frc	E5009	1.39016
Crohn's Disease	MTG	Crohn's Disease	frc	E5013	0.870605
Crohn's Disease	MTG	Crohn's Disease	frc	H4001	1.4569
Crohn's Disease	MTG	Crohn's Disease	frc	H4004	5.36489
Crohn's Disease	MTG	Crohn's Disease	frc	H4006	5.37813
Crohn's Disease	MTG	Crohn's Disease	frc	H4007	0.148768
Crohn's Disease	MTG	Crohn's Disease	frc	H4012	2.5739
Crohn's Disease	MTG	Crohn's Disease	frc	H4014	7.54069
Crohn's Disease	MTG	Crohn's Disease	frc	H4015	11.2541
Crohn's Disease	MTG	Crohn's Disease	frc	H4017	37.7911
Crohn's Disease	MTG	Crohn's Disease	frc	H4020	0.389022
Crohn's Disease	MTG	Crohn's Disease	frc	H4028	0.819052
Crohn's Disease	MTG	Crohn's Disease	frc	H4030	16.8142
Crohn's Disease	MTG	Crohn's Disease	frc	H4031	0.485438
Crohn's Disease	MTG	Crohn's Disease	frc	H4032	0.539878
Crohn's Disease	MTG	Crohn's Disease	frc	H4038	1.93182
Crohn's Disease	MTG	Crohn's Disease	frc	H4039	2.84315
Crohn's Disease	MTG	Crohn's Disease	frc	H4043	0.288028
Crohn's Disease	MTG	Crohn's Disease	frc	M2008	1.50812
Crohn's Disease	MTG	Crohn's Disease	frc	M2010	23.3695
Crohn's Disease	MTG	Crohn's Disease	frc	M2014	0.974289
Crohn's Disease	MTG	Crohn's Disease	frc	M2021	3.74145
Crohn's Disease	MTG	Crohn's Disease	frc	M2025	0.791402
Crohn's Disease	MTG	Crohn's Disease	frc	M2027	1.1548
Crohn's Disease	MTG	Crohn's Disease	frc	M2028	0.753258
Crohn's Disease	MTG	Crohn's Disease	frc	M2034	15.0566
Crohn's Disease	MTG	Crohn's Disease	frc	M2068	4.5376
Crohn's Disease	MTG	Crohn's Disease	frc	M2085	0.114905
Crohn's Disease	MTG	Crohn's Disease	frc	P6005	2.84449
Crohn's Disease	MTG	Crohn's Disease	frc	P6009	3.17041
Crohn's Disease	MTG	Crohn's Disease	frc	P6010	73.8359
Crohn's Disease	MTG	Crohn's Disease	frc	P6016	0.304588
Crohn's Disease	MTG	Crohn's Disease	frc	P6024	13.7095
Crohn's Disease	MTG	Crohn's Disease	frc	P6028	155.408
Crohn's Disease	MTG	Crohn's Disease	frc	P6033	0.103822
Crohn's Disease	MTG	Crohn's Disease	frc	P6037	1.52709
Crohn's Disease	MTG	Crohn's Disease	oxc	C2014	0.274148
Crohn's Disease	MTG	Crohn's Disease	oxc	C2034	12.0281
Crohn's Disease	MTG	Crohn's Disease	oxc	C2086	4.57844
Crohn's Disease	MTG	Crohn's Disease	oxc	C3001	1.91306
Crohn's Disease	MTG	Crohn's Disease	oxc	C3002	1.13723
Crohn's Disease	MTG	Crohn's Disease	oxc	C3007	17.6794
Crohn's Disease	MTG	Crohn's Disease	oxc	C3008	0.0255569
Crohn's Disease	MTG	Crohn's Disease	oxc	C3009	13.9239
Crohn's Disease	MTG	Crohn's Disease	oxc	C3010	4.16535
Crohn's Disease	MTG	Crohn's Disease	oxc	C3012	0.900838
Crohn's Disease	MTG	Crohn's Disease	oxc	C3016	1.04093
Crohn's Disease	MTG	Crohn's Disease	oxc	C3017	9.61794
Crohn's Disease	MTG	Crohn's Disease	oxc	C3019	0.413784
Crohn's Disease	MTG	Crohn's Disease	oxc	C3020	28.3658
Crohn's Disease	MTG	Crohn's Disease	oxc	C3021	5.96358
Crohn's Disease	MTG	Crohn's Disease	oxc	C3023	1.64568
Crohn's Disease	MTG	Crohn's Disease	oxc	C3027	0.193447
Crohn's Disease	MTG	Crohn's Disease	oxc	C3028	1.44581
Crohn's Disease	MTG	Crohn's Disease	oxc	C3030	7.19625
Crohn's Disease	MTG	Crohn's Disease	oxc	C3031	0.166545
Crohn's Disease	MTG	Crohn's Disease	oxc	C3033	9.65732
Crohn's Disease	MTG	Crohn's Disease	oxc	C3035	1.75957
Crohn's Disease	MTG	Crohn's Disease	oxc	C4006	2.46962
Crohn's Disease	MTG	Crohn's Disease	oxc	C4015	0.567031
Crohn's Disease	MTG	Crohn's Disease	oxc	C4028	1.03545
Crohn's Disease	MTG	Crohn's Disease	oxc	C4030	0.149917
Crohn's Disease	MTG	Crohn's Disease	oxc	C5001	0.22877
Crohn's Disease	MTG	Crohn's Disease	oxc	C5009	0.0464281
Crohn's Disease	MTG	Crohn's Disease	oxc	C5019	0.43115
Crohn's Disease	MTG	Crohn's Disease	oxc	C5023	3.92245
Crohn's Disease	MTG	Crohn's Disease	oxc	C6009	1.88767
Crohn's Disease	MTG	Crohn's Disease	oxc	C6010	0.0284845
Crohn's Disease	MTG	Crohn's Disease	oxc	C6028	25.4398
Crohn's Disease	MTG	Crohn's Disease	oxc	E5001	0.694992
Crohn's Disease	MTG	Crohn's Disease	oxc	E5003	0.263294
Crohn's Disease	MTG	Crohn's Disease	oxc	E5006	0.925885
Crohn's Disease	MTG	Crohn's Disease	oxc	E5009	1.24729
Crohn's Disease	MTG	Crohn's Disease	oxc	E5013	0.601555
Crohn's Disease	MTG	Crohn's Disease	oxc	H4001	1.19019
Crohn's Disease	MTG	Crohn's Disease	oxc	H4004	4.77082
Crohn's Disease	MTG	Crohn's Disease	oxc	H4006	6.38215
Crohn's Disease	MTG	Crohn's Disease	oxc	H4007	0.144971
Crohn's Disease	MTG	Crohn's Disease	oxc	H4011	0.293471
Crohn's Disease	MTG	Crohn's Disease	oxc	H4012	3.16306
Crohn's Disease	MTG	Crohn's Disease	oxc	H4014	7.86611
Crohn's Disease	MTG	Crohn's Disease	oxc	H4015	3.86914
Crohn's Disease	MTG	Crohn's Disease	oxc	H4017	21.4959
Crohn's Disease	MTG	Crohn's Disease	oxc	H4020	0.368413
Crohn's Disease	MTG	Crohn's Disease	oxc	H4028	0.643841
Crohn's Disease	MTG	Crohn's Disease	oxc	H4030	11.9759
Crohn's Disease	MTG	Crohn's Disease	oxc	H4031	0.434839
Crohn's Disease	MTG	Crohn's Disease	oxc	H4032	0.380746
Crohn's Disease	MTG	Crohn's Disease	oxc	H4038	0.952092
Crohn's Disease	MTG	Crohn's Disease	oxc	H4039	2.24167
Crohn's Disease	MTG	Crohn's Disease	oxc	H4043	0.364389
Crohn's Disease	MTG	Crohn's Disease	oxc	M2008	1.14634
Crohn's Disease	MTG	Crohn's Disease	oxc	M2010	12.5636
Crohn's Disease	MTG	Crohn's Disease	oxc	M2014	0.607186
Crohn's Disease	MTG	Crohn's Disease	oxc	M2021	3.18371
Crohn's Disease	MTG	Crohn's Disease	oxc	M2025	0.309694
Crohn's Disease	MTG	Crohn's Disease	oxc	M2027	0.649045
Crohn's Disease	MTG	Crohn's Disease	oxc	M2028	0.957764
Crohn's Disease	MTG	Crohn's Disease	oxc	M2034	7.89328
Crohn's Disease	MTG	Crohn's Disease	oxc	M2068	4.56666
Crohn's Disease	MTG	Crohn's Disease	oxc	M2085	0.396971
Crohn's Disease	MTG	Crohn's Disease	oxc	P6005	2.55931
Crohn's Disease	MTG	Crohn's Disease	oxc	P6009	2.24109
Crohn's Disease	MTG	Crohn's Disease	oxc	P6010	70.0468
Crohn's Disease	MTG	Crohn's Disease	oxc	P6016	0.211974
Crohn's Disease	MTG	Crohn's Disease	oxc	P6024	10.2304
Crohn's Disease	MTG	Crohn's Disease	oxc	P6028	114.358
Crohn's Disease	MTG	Crohn's Disease	oxc	P6033	0.255466
Crohn's Disease	MTG	Crohn's Disease	oxc	P6037	1.10025
Crohn's Disease	MTS	Crohn's Disease	oxdd	E5009	0.268422
Crohn's Disease	MTS	Crohn's Disease	oxdd	H4006	0.0427661
Crohn's Disease	MTS	Crohn's Disease	oxdd	P6005	0.211435
Crohn's Disease	MTS	Crohn's Disease	frc	C3007	0.219755
Crohn's Disease	MTS	Crohn's Disease	frc	C3009	1.41551
Crohn's Disease	MTS	Crohn's Disease	frc	C3010	3.39749
Crohn's Disease	MTS	Crohn's Disease	frc	C3016	3.08057
Crohn's Disease	MTS	Crohn's Disease	frc	C3021	1.12854
Crohn's Disease	MTS	Crohn's Disease	frc	C3023	0.955721
Crohn's Disease	MTS	Crohn's Disease	frc	C3027	0.0638099
Crohn's Disease	MTS	Crohn's Disease	frc	C3028	0.105532
Crohn's Disease	MTS	Crohn's Disease	frc	C3030	1.14653
Crohn's Disease	MTS	Crohn's Disease	frc	C3035	0.166466
Crohn's Disease	MTS	Crohn's Disease	frc	E5001	0.0331767
Crohn's Disease	MTS	Crohn's Disease	frc	E5006	0.249509
Crohn's Disease	MTS	Crohn's Disease	frc	E5013	0.516643
Crohn's Disease	MTS	Crohn's Disease	frc	H4004	0.182999
Crohn's Disease	MTS	Crohn's Disease	frc	H4006	0.220014
Crohn's Disease	MTS	Crohn's Disease	frc	H4015	19.1781
Crohn's Disease	MTS	Crohn's Disease	frc	H4017	1.56314
Crohn's Disease	MTS	Crohn's Disease	frc	H4020	0.106659
Crohn's Disease	MTS	Crohn's Disease	frc	H4028	0.320642
Crohn's Disease	MTS	Crohn's Disease	frc	H4030	25.297
Crohn's Disease	MTS	Crohn's Disease	frc	H4038	0.0758714
Crohn's Disease	MTS	Crohn's Disease	frc	H4039	0.550875
Crohn's Disease	MTS	Crohn's Disease	frc	M2008	0.155194
Crohn's Disease	MTS	Crohn's Disease	frc	M2014	1.16311
Crohn's Disease	MTS	Crohn's Disease	frc	M2021	3.57407
Crohn's Disease	MTS	Crohn's Disease	frc	M2025	5.32255
Crohn's Disease	MTS	Crohn's Disease	frc	M2027	0.503907
Crohn's Disease	MTS	Crohn's Disease	frc	M2034	0.589544
Crohn's Disease	MTS	Crohn's Disease	frc	M2068	0.181299
Crohn's Disease	MTS	Crohn's Disease	frc	P6005	0.160355
Crohn's Disease	MTS	Crohn's Disease	frc	P6010	25.2932
Crohn's Disease	MTS	Crohn's Disease	frc	P6016	0.100354
Crohn's Disease	MTS	Crohn's Disease	frc	P6024	1.65306
Crohn's Disease	MTS	Crohn's Disease	frc	P6028	14.8474
Crohn's Disease	MTS	Crohn's Disease	frc	P6037	0.0617721
Crohn's Disease	MTS	Crohn's Disease	oxc	C3009	0.760102
Crohn's Disease	MTS	Crohn's Disease	oxc	C3010	6.64122
Crohn's Disease	MTS	Crohn's Disease	oxc	C3012	0.0358462
Crohn's Disease	MTS	Crohn's Disease	oxc	C3016	1.42271
Crohn's Disease	MTS	Crohn's Disease	oxc	C3021	0.34837
Crohn's Disease	MTS	Crohn's Disease	oxc	C3023	0.67935
Crohn's Disease	MTS	Crohn's Disease	oxc	C3030	0.322103
Crohn's Disease	MTS	Crohn's Disease	oxc	E5001	0.209229
Crohn's Disease	MTS	Crohn's Disease	oxc	E5006	0.341136
Crohn's Disease	MTS	Crohn's Disease	oxc	E5013	0.544574
Crohn's Disease	MTS	Crohn's Disease	oxc	H4004	0.166037
Crohn's Disease	MTS	Crohn's Disease	oxc	H4006	0.297809
Crohn's Disease	MTS	Crohn's Disease	oxc	H4015	0.531833
Crohn's Disease	MTS	Crohn's Disease	oxc	H4017	0.110977
Crohn's Disease	MTS	Crohn's Disease	oxc	H4028	0.111714
Crohn's Disease	MTS	Crohn's Disease	oxc	H4030	21.9728
Crohn's Disease	MTS	Crohn's Disease	oxc	H4039	0.112728
Crohn's Disease	MTS	Crohn's Disease	oxc	H4043	0.111264
Crohn's Disease	MTS	Crohn's Disease	oxc	M2014	1.57987
Crohn's Disease	MTS	Crohn's Disease	oxc	M2021	3.24475
Crohn's Disease	MTS	Crohn's Disease	oxc	M2025	7.79567
Crohn's Disease	MTS	Crohn's Disease	oxc	M2027	0.666865
Crohn's Disease	MTS	Crohn's Disease	oxc	M2028	0.0767331
Crohn's Disease	MTS	Crohn's Disease	oxc	M2068	0.238893
Crohn's Disease	MTS	Crohn's Disease	oxc	P6005	0.0160698
Crohn's Disease	MTS	Crohn's Disease	oxc	P6009	0.0523217
Crohn's Disease	MTS	Crohn's Disease	oxc	P6010	28.5335
Crohn's Disease	MTS	Crohn's Disease	oxc	P6028	16.8998
Crohn's Disease	MTS	Crohn's Disease	oxc	P6037	0.0320111
Crohn's Disease	MTG	Crohn's Disease-L3	oxdd	C3010	0.153315
Crohn's Disease	MTG	Crohn's Disease-L3	oxdd	E5003	0.0451129
Crohn's Disease	MTG	Crohn's Disease-L3	oxdd	H4001	0.0297954
Crohn's Disease	MTG	Crohn's Disease-L3	oxdd	H4015	0.188942
Crohn's Disease	MTG	Crohn's Disease-L3	oxdd	H4017	0.0508758
Crohn's Disease	MTG	Crohn's Disease-L3	oxdd	H4039	0.102187
Crohn's Disease	MTG	Crohn's Disease-L3	frc	C3001	1.92934
Crohn's Disease	MTG	Crohn's Disease-L3	frc	C3002	1.17124
Crohn's Disease	MTG	Crohn's Disease-L3	frc	C3009	24.5822
Crohn's Disease	MTG	Crohn's Disease-L3	frc	C3010	4.53878
Crohn's Disease	MTG	Crohn's Disease-L3	frc	C3017	14.4123
Crohn's Disease	MTG	Crohn's Disease-L3	frc	C3019	0.643536
Crohn's Disease	MTG	Crohn's Disease-L3	frc	C3020	37.2556
Crohn's Disease	MTG	Crohn's Disease-L3	frc	C3023	2.32546
Crohn's Disease	MTG	Crohn's Disease-L3	frc	C3035	2.27135
Crohn's Disease	MTG	Crohn's Disease-L3	frc	E5001	0.936772
Crohn's Disease	MTG	Crohn's Disease-L3	frc	E5003	0.616327
Crohn's Disease	MTG	Crohn's Disease-L3	frc	H4001	1.4569
Crohn's Disease	MTG	Crohn's Disease-L3	frc	H4004	5.36489
Crohn's Disease	MTG	Crohn's Disease-L3	frc	H4007	0.148768
Crohn's Disease	MTG	Crohn's Disease-L3	frc	H4012	2.5739
Crohn's Disease	MTG	Crohn's Disease-L3	frc	H4014	7.54069
Crohn's Disease	MTG	Crohn's Disease-L3	frc	H4015	11.2541
Crohn's Disease	MTG	Crohn's Disease-L3	frc	H4017	37.7911
Crohn's Disease	MTG	Crohn's Disease-L3	frc	H4032	0.539878
Crohn's Disease	MTG	Crohn's Disease-L3	frc	H4038	1.93182
Crohn's Disease	MTG	Crohn's Disease-L3	frc	H4039	2.84315
Crohn's Disease	MTG	Crohn's Disease-L3	frc	H4043	0.288028
Crohn's Disease	MTG	Crohn's Disease-L3	frc	M2034	15.0566
Crohn's Disease	MTG	Crohn's Disease-L3	frc	P6005	2.84449
Crohn's Disease	MTG	Crohn's Disease-L3	frc	P6010	73.8359
Crohn's Disease	MTG	Crohn's Disease-L3	frc	P6016	0.304588
Crohn's Disease	MTG	Crohn's Disease-L3	frc	P6024	13.7095
Crohn's Disease	MTG	Crohn's Disease-L3	frc	P6033	0.103822
Crohn's Disease	MTG	Crohn's Disease-L3	frc	P6037	1.52709
Crohn's Disease	MTG	Crohn's Disease-L3	oxc	C3001	1.91306
Crohn's Disease	MTG	Crohn's Disease-L3	oxc	C3002	1.13723
Crohn's Disease	MTG	Crohn's Disease-L3	oxc	C3009	13.9239
Crohn's Disease	MTG	Crohn's Disease-L3	oxc	C3010	4.16535
Crohn's Disease	MTG	Crohn's Disease-L3	oxc	C3017	9.61794
Crohn's Disease	MTG	Crohn's Disease-L3	oxc	C3019	0.413784
Crohn's Disease	MTG	Crohn's Disease-L3	oxc	C3020	28.3658
Crohn's Disease	MTG	Crohn's Disease-L3	oxc	C3023	1.64568
Crohn's Disease	MTG	Crohn's Disease-L3	oxc	C3035	1.75957
Crohn's Disease	MTG	Crohn's Disease-L3	oxc	E5001	0.694992
Crohn's Disease	MTG	Crohn's Disease-L3	oxc	E5003	0.263294
Crohn's Disease	MTG	Crohn's Disease-L3	oxc	H4001	1.19019
Crohn's Disease	MTG	Crohn's Disease-L3	oxc	H4004	4.77082
Crohn's Disease	MTG	Crohn's Disease-L3	oxc	H4007	0.144971
Crohn's Disease	MTG	Crohn's Disease-L3	oxc	H4011	0.293471
Crohn's Disease	MTG	Crohn's Disease-L3	oxc	H4012	3.16306
Crohn's Disease	MTG	Crohn's Disease-L3	oxc	H4014	7.86611
Crohn's Disease	MTG	Crohn's Disease-L3	oxc	H4015	3.86914
Crohn's Disease	MTG	Crohn's Disease-L3	oxc	H4017	21.4959
Crohn's Disease	MTG	Crohn's Disease-L3	oxc	H4032	0.380746
Crohn's Disease	MTG	Crohn's Disease-L3	oxc	H4038	0.952092
Crohn's Disease	MTG	Crohn's Disease-L3	oxc	H4039	2.24167
Crohn's Disease	MTG	Crohn's Disease-L3	oxc	H4043	0.364389
Crohn's Disease	MTG	Crohn's Disease-L3	oxc	M2034	7.89328
Crohn's Disease	MTG	Crohn's Disease-L3	oxc	P6005	2.55931
Crohn's Disease	MTG	Crohn's Disease-L3	oxc	P6010	70.0468
Crohn's Disease	MTG	Crohn's Disease-L3	oxc	P6016	0.211974
Crohn's Disease	MTG	Crohn's Disease-L3	oxc	P6024	10.2304
Crohn's Disease	MTG	Crohn's Disease-L3	oxc	P6033	0.255466
Crohn's Disease	MTG	Crohn's Disease-L3	oxc	P6037	1.10025
Crohn's Disease	MTS	Crohn's Disease-L3	oxdd	P6005	0.211435
Crohn's Disease	MTS	Crohn's Disease-L3	frc	C3009	1.41551
Crohn's Disease	MTS	Crohn's Disease-L3	frc	C3010	3.39749
Crohn's Disease	MTS	Crohn's Disease-L3	frc	C3023	0.955721
Crohn's Disease	MTS	Crohn's Disease-L3	frc	C3035	0.166466
Crohn's Disease	MTS	Crohn's Disease-L3	frc	E5001	0.0331767
Crohn's Disease	MTS	Crohn's Disease-L3	frc	H4004	0.182999
Crohn's Disease	MTS	Crohn's Disease-L3	frc	H4015	19.1781
Crohn's Disease	MTS	Crohn's Disease-L3	frc	H4017	1.56314
Crohn's Disease	MTS	Crohn's Disease-L3	frc	H4038	0.0758714
Crohn's Disease	MTS	Crohn's Disease-L3	frc	H4039	0.550875
Crohn's Disease	MTS	Crohn's Disease-L3	frc	M2034	0.589544
Crohn's Disease	MTS	Crohn's Disease-L3	frc	P6005	0.160355
Crohn's Disease	MTS	Crohn's Disease-L3	frc	P6010	25.2932
Crohn's Disease	MTS	Crohn's Disease-L3	frc	P6016	0.100354
Crohn's Disease	MTS	Crohn's Disease-L3	frc	P6024	1.65306
Crohn's Disease	MTS	Crohn's Disease-L3	frc	P6037	0.0617721
Crohn's Disease	MTS	Crohn's Disease-L3	oxc	C3009	0.760102
Crohn's Disease	MTS	Crohn's Disease-L3	oxc	C3010	6.64122
Crohn's Disease	MTS	Crohn's Disease-L3	oxc	C3023	0.67935
Crohn's Disease	MTS	Crohn's Disease-L3	oxc	E5001	0.209229
Crohn's Disease	MTS	Crohn's Disease-L3	oxc	H4004	0.166037
Crohn's Disease	MTS	Crohn's Disease-L3	oxc	H4015	0.531833
Crohn's Disease	MTS	Crohn's Disease-L3	oxc	H4017	0.110977
Crohn's Disease	MTS	Crohn's Disease-L3	oxc	H4039	0.112728
Crohn's Disease	MTS	Crohn's Disease-L3	oxc	H4043	0.111264
Crohn's Disease	MTS	Crohn's Disease-L3	oxc	P6005	0.0160698
Crohn's Disease	MTS	Crohn's Disease-L3	oxc	P6010	28.5335
Crohn's Disease	MTS	Crohn's Disease-L3	oxc	P6037	0.0320111
Crohn's Disease	MTG	Crohn's Disease-nonL3	oxdd	C3021	0.0734636
Crohn's Disease	MTG	Crohn's Disease-nonL3	oxdd	C3031	0.0829698
Crohn's Disease	MTG	Crohn's Disease-nonL3	oxdd	E5009	0.0828116
Crohn's Disease	MTG	Crohn's Disease-nonL3	oxdd	E5013	0.0450525
Crohn's Disease	MTG	Crohn's Disease-nonL3	oxdd	M2014	0.050971
Crohn's Disease	MTG	Crohn's Disease-nonL3	oxdd	M2028	0.0601357
Crohn's Disease	MTG	Crohn's Disease-nonL3	oxdd	P6028	0.0664057
Crohn's Disease	MTG	Crohn's Disease-nonL3	frc	C3007	15.4355
Crohn's Disease	MTG	Crohn's Disease-nonL3	frc	C3008	0.150322
Crohn's Disease	MTG	Crohn's Disease-nonL3	frc	C3012	0.684377
Crohn's Disease	MTG	Crohn's Disease-nonL3	frc	C3016	1.33323
Crohn's Disease	MTG	Crohn's Disease-nonL3	frc	C3021	6.67754
Crohn's Disease	MTG	Crohn's Disease-nonL3	frc	C3027	0.374898
Crohn's Disease	MTG	Crohn's Disease-nonL3	frc	C3028	2.23421
Crohn's Disease	MTG	Crohn's Disease-nonL3	frc	C3030	16.6587
Crohn's Disease	MTG	Crohn's Disease-nonL3	frc	C3031	0.690856
Crohn's Disease	MTG	Crohn's Disease-nonL3	frc	C3033	33.3353
Crohn's Disease	MTG	Crohn's Disease-nonL3	frc	E5006	2.52168
Crohn's Disease	MTG	Crohn's Disease-nonL3	frc	E5009	1.39016
Crohn's Disease	MTG	Crohn's Disease-nonL3	frc	E5013	0.870605
Crohn's Disease	MTG	Crohn's Disease-nonL3	frc	H4006	5.37813
Crohn's Disease	MTG	Crohn's Disease-nonL3	frc	H4020	0.389022
Crohn's Disease	MTG	Crohn's Disease-nonL3	frc	H4028	0.819052
Crohn's Disease	MTG	Crohn's Disease-nonL3	frc	H4030	16.8142
Crohn's Disease	MTG	Crohn's Disease-nonL3	frc	H4031	0.485438
Crohn's Disease	MTG	Crohn's Disease-nonL3	frc	M2008	1.50812
Crohn's Disease	MTG	Crohn's Disease-nonL3	frc	M2010	23.3695
Crohn's Disease	MTG	Crohn's Disease-nonL3	frc	M2014	0.974289
Crohn's Disease	MTG	Crohn's Disease-nonL3	frc	M2021	3.74145
Crohn's Disease	MTG	Crohn's Disease-nonL3	frc	M2025	0.791402
Crohn's Disease	MTG	Crohn's Disease-nonL3	frc	M2027	1.1548
Crohn's Disease	MTG	Crohn's Disease-nonL3	frc	M2028	0.753258
Crohn's Disease	MTG	Crohn's Disease-nonL3	frc	M2068	4.5376
Crohn's Disease	MTG	Crohn's Disease-nonL3	frc	M2085	0.114905
Crohn's Disease	MTG	Crohn's Disease-nonL3	frc	P6009	3.17041
Crohn's Disease	MTG	Crohn's Disease-nonL3	frc	P6028	155.408
Crohn's Disease	MTG	Crohn's Disease-nonL3	oxc	C3007	17.6794
Crohn's Disease	MTG	Crohn's Disease-nonL3	oxc	C3008	0.0255569
Crohn's Disease	MTG	Crohn's Disease-nonL3	oxc	C3012	0.900838
Crohn's Disease	MTG	Crohn's Disease-nonL3	oxc	C3016	1.04093
Crohn's Disease	MTG	Crohn's Disease-nonL3	oxc	C3021	5.96358
Crohn's Disease	MTG	Crohn's Disease-nonL3	oxc	C3027	0.193447
Crohn's Disease	MTG	Crohn's Disease-nonL3	oxc	C3028	1.44581
Crohn's Disease	MTG	Crohn's Disease-nonL3	oxc	C3030	7.19625
Crohn's Disease	MTG	Crohn's Disease-nonL3	oxc	C3031	0.166545
Crohn's Disease	MTG	Crohn's Disease-nonL3	oxc	C3033	9.65732
Crohn's Disease	MTG	Crohn's Disease-nonL3	oxc	E5006	0.925885
Crohn's Disease	MTG	Crohn's Disease-nonL3	oxc	E5009	1.24729
Crohn's Disease	MTG	Crohn's Disease-nonL3	oxc	E5013	0.601555
Crohn's Disease	MTG	Crohn's Disease-nonL3	oxc	H4006	6.38215
Crohn's Disease	MTG	Crohn's Disease-nonL3	oxc	H4020	0.368413
Crohn's Disease	MTG	Crohn's Disease-nonL3	oxc	H4028	0.643841
Crohn's Disease	MTG	Crohn's Disease-nonL3	oxc	H4030	11.9759
Crohn's Disease	MTG	Crohn's Disease-nonL3	oxc	H4031	0.434839
Crohn's Disease	MTG	Crohn's Disease-nonL3	oxc	M2008	1.14634
Crohn's Disease	MTG	Crohn's Disease-nonL3	oxc	M2010	12.5636
Crohn's Disease	MTG	Crohn's Disease-nonL3	oxc	M2014	0.607186
Crohn's Disease	MTG	Crohn's Disease-nonL3	oxc	M2021	3.18371
Crohn's Disease	MTG	Crohn's Disease-nonL3	oxc	M2025	0.309694
Crohn's Disease	MTG	Crohn's Disease-nonL3	oxc	M2027	0.649045
Crohn's Disease	MTG	Crohn's Disease-nonL3	oxc	M2028	0.957764
Crohn's Disease	MTG	Crohn's Disease-nonL3	oxc	M2068	4.56666
Crohn's Disease	MTG	Crohn's Disease-nonL3	oxc	M2085	0.396971
Crohn's Disease	MTG	Crohn's Disease-nonL3	oxc	P6009	2.24109
Crohn's Disease	MTG	Crohn's Disease-nonL3	oxc	P6028	114.358
Crohn's Disease	MTS	Crohn's Disease-nonL3	oxdd	E5009	0.268422
Crohn's Disease	MTS	Crohn's Disease-nonL3	oxdd	H4006	0.0427661
Crohn's Disease	MTS	Crohn's Disease-nonL3	frc	C3007	0.219755
Crohn's Disease	MTS	Crohn's Disease-nonL3	frc	C3016	3.08057
Crohn's Disease	MTS	Crohn's Disease-nonL3	frc	C3021	1.12854
Crohn's Disease	MTS	Crohn's Disease-nonL3	frc	C3027	0.0638099
Crohn's Disease	MTS	Crohn's Disease-nonL3	frc	C3028	0.105532
Crohn's Disease	MTS	Crohn's Disease-nonL3	frc	C3030	1.14653
Crohn's Disease	MTS	Crohn's Disease-nonL3	frc	E5006	0.249509
Crohn's Disease	MTS	Crohn's Disease-nonL3	frc	E5013	0.516643
Crohn's Disease	MTS	Crohn's Disease-nonL3	frc	H4006	0.220014
Crohn's Disease	MTS	Crohn's Disease-nonL3	frc	H4020	0.106659
Crohn's Disease	MTS	Crohn's Disease-nonL3	frc	H4028	0.320642
Crohn's Disease	MTS	Crohn's Disease-nonL3	frc	H4030	25.297
Crohn's Disease	MTS	Crohn's Disease-nonL3	frc	M2008	0.155194
Crohn's Disease	MTS	Crohn's Disease-nonL3	frc	M2014	1.16311
Crohn's Disease	MTS	Crohn's Disease-nonL3	frc	M2021	3.57407
Crohn's Disease	MTS	Crohn's Disease-nonL3	frc	M2025	5.32255
Crohn's Disease	MTS	Crohn's Disease-nonL3	frc	M2027	0.503907
Crohn's Disease	MTS	Crohn's Disease-nonL3	frc	M2068	0.181299
Crohn's Disease	MTS	Crohn's Disease-nonL3	frc	P6028	14.8474
Crohn's Disease	MTS	Crohn's Disease-nonL3	oxc	C3012	0.0358462
Crohn's Disease	MTS	Crohn's Disease-nonL3	oxc	C3016	1.42271
Crohn's Disease	MTS	Crohn's Disease-nonL3	oxc	C3021	0.34837
Crohn's Disease	MTS	Crohn's Disease-nonL3	oxc	C3030	0.322103
Crohn's Disease	MTS	Crohn's Disease-nonL3	oxc	E5006	0.341136
Crohn's Disease	MTS	Crohn's Disease-nonL3	oxc	E5013	0.544574
Crohn's Disease	MTS	Crohn's Disease-nonL3	oxc	H4006	0.297809
Crohn's Disease	MTS	Crohn's Disease-nonL3	oxc	H4028	0.111714
Crohn's Disease	MTS	Crohn's Disease-nonL3	oxc	H4030	21.9728
Crohn's Disease	MTS	Crohn's Disease-nonL3	oxc	M2014	1.57987
Crohn's Disease	MTS	Crohn's Disease-nonL3	oxc	M2021	3.24475
Crohn's Disease	MTS	Crohn's Disease-nonL3	oxc	M2025	7.79567
Crohn's Disease	MTS	Crohn's Disease-nonL3	oxc	M2027	0.666865
Crohn's Disease	MTS	Crohn's Disease-nonL3	oxc	M2028	0.0767331
Crohn's Disease	MTS	Crohn's Disease-nonL3	oxc	M2068	0.238893
Crohn's Disease	MTS	Crohn's Disease-nonL3	oxc	P6009	0.0523217
Crohn's Disease	MTS	Crohn's Disease-nonL3	oxc	P6028	16.8998
