# Supplementary material for: Microbial genetic and transcriptional contributions to oxalate degradation by the gut microbiota in health and disease
Source: eLife. 2021 Mar 26;10:e63642. doi: 10.7554/eLife.63642 (PMC8062136; doi:10.7554/eLife.63642)
Supplement: Figure 5—source data 1. [file elife-63642-fig5-data1.xlsx]

## Sheet: Sheet1
Study	Assay	enzyme	uniprotID	Phylum	Class	Order	Family	Genus	Species	subject	Phenotype	RPKM
Crohn's Disease	MTG	oxdd	A0A2B7X6Z0	Ascomycota	Eurotiomycetes	Onygenales	Ajellomycetaceae	Helicocarpus	Helicocarpus griseus UAMH5409	C2086	Crohn's Disease	0.0308707
Crohn's Disease	MTG	oxdd	A0A059IAI5	Proteobacteria	Gammaproteobacteria	Enterobacterales	Erwiniaceae	Pantoea	Pantoea agglomerans Eh318	C3010	Crohn's Disease	0.0514309
Crohn's Disease	MTG	oxdd	A0A1M7BDS5	Firmicutes	Clostridia	Clostridiales	Lachnospiraceae	Anaerocolumna	Anaerocolumna jejuensis DSM 15929	C3010	Crohn's Disease	0.0515963
Crohn's Disease	MTG	oxdd	A0A2V1YSM9	Proteobacteria	Gammaproteobacteria	Enterobacterales	Erwiniaceae	Pantoea	Pantoea allii	C3010	Crohn's Disease	0.050288
Crohn's Disease	MTG	oxdd	A0A059IAI5	Proteobacteria	Gammaproteobacteria	Enterobacterales	Erwiniaceae	Pantoea	Pantoea agglomerans Eh318	C3010	Crohn's Disease-L3	0.0514309
Crohn's Disease	MTG	oxdd	A0A1M7BDS5	Firmicutes	Clostridia	Clostridiales	Lachnospiraceae	Anaerocolumna	Anaerocolumna jejuensis DSM 15929	C3010	Crohn's Disease-L3	0.0515963
Crohn's Disease	MTG	oxdd	A0A2V1YSM9	Proteobacteria	Gammaproteobacteria	Enterobacterales	Erwiniaceae	Pantoea	Pantoea allii	C3010	Crohn's Disease-L3	0.050288
Crohn's Disease	MTG	oxdd	A0A1M7BDS5	Firmicutes	Clostridia	Clostridiales	Lachnospiraceae	Anaerocolumna	Anaerocolumna jejuensis DSM 15929	C3021	Crohn's Disease	0.0734636
Crohn's Disease	MTG	oxdd	A0A1M7BDS5	Firmicutes	Clostridia	Clostridiales	Lachnospiraceae	Anaerocolumna	Anaerocolumna jejuensis DSM 15929	C3021	Crohn's Disease-nonL3	0.0734636
Crohn's Disease	MTG	oxdd	A0A1M7BDS5	Firmicutes	Clostridia	Clostridiales	Lachnospiraceae	Anaerocolumna	Anaerocolumna jejuensis DSM 15929	C3031	Crohn's Disease	0.0829698
Crohn's Disease	MTG	oxdd	A0A1M7BDS5	Firmicutes	Clostridia	Clostridiales	Lachnospiraceae	Anaerocolumna	Anaerocolumna jejuensis DSM 15929	C3031	Crohn's Disease-nonL3	0.0829698
Crohn's Disease	MTG	oxdd	A0A1M7BDS5	Firmicutes	Clostridia	Clostridiales	Lachnospiraceae	Anaerocolumna	Anaerocolumna jejuensis DSM 15929	E5003	Crohn's Disease	0.0451129
Crohn's Disease	MTG	oxdd	A0A1M7BDS5	Firmicutes	Clostridia	Clostridiales	Lachnospiraceae	Anaerocolumna	Anaerocolumna jejuensis DSM 15929	E5003	Crohn's Disease-L3	0.0451129
Crohn's Disease	MTG	oxdd	A0A0E2EPN7	Firmicutes	Bacilli	Lactobacillales	Streptococcaceae	Streptococcus	Streptococcus mutans SM6	E5009	Crohn's Disease	0.0828116
Crohn's Disease	MTS	oxdd	A0A0E2EPN7	Firmicutes	Bacilli	Lactobacillales	Streptococcaceae	Streptococcus	Streptococcus mutans SM6	E5009	Crohn's Disease	0.268422
Crohn's Disease	MTG	oxdd	A0A0E2EPN7	Firmicutes	Bacilli	Lactobacillales	Streptococcaceae	Streptococcus	Streptococcus mutans SM6	E5009	Crohn's Disease-nonL3	0.0828116
Crohn's Disease	MTS	oxdd	A0A0E2EPN7	Firmicutes	Bacilli	Lactobacillales	Streptococcaceae	Streptococcus	Streptococcus mutans SM6	E5009	Crohn's Disease-nonL3	0.268422
Crohn's Disease	MTG	oxdd	A0A0E2EPN7	Firmicutes	Bacilli	Lactobacillales	Streptococcaceae	Streptococcus	Streptococcus mutans SM6	E5013	Crohn's Disease	0.0450525
Crohn's Disease	MTG	oxdd	A0A0E2EPN7	Firmicutes	Bacilli	Lactobacillales	Streptococcaceae	Streptococcus	Streptococcus mutans SM6	E5013	Crohn's Disease-nonL3	0.0450525
Crohn's Disease	MTG	oxdd	A0A0E2EPN7	Firmicutes	Bacilli	Lactobacillales	Streptococcaceae	Streptococcus	Streptococcus mutans SM6	H4001	Crohn's Disease	0.0297954
Crohn's Disease	MTG	oxdd	A0A0E2EPN7	Firmicutes	Bacilli	Lactobacillales	Streptococcaceae	Streptococcus	Streptococcus mutans SM6	H4001	Crohn's Disease-L3	0.0297954
Crohn's Disease	MTS	oxdd	K5X393	Basidiomycota	Agaricomycetes	Agaricales	Agaricaceae	Agaricus	Agaricus bisporus var. burnettii JB137-S8	H4006	Crohn's Disease	0.0427661
Crohn's Disease	MTS	oxdd	K5X393	Basidiomycota	Agaricomycetes	Agaricales	Agaricaceae	Agaricus	Agaricus bisporus var. burnettii JB137-S8	H4006	Crohn's Disease-nonL3	0.0427661
Crohn's Disease	MTG	oxdd	A0A081P6G7	Firmicutes	Bacilli	Bacillales	Paenibacillaceae	Paenibacillus	Paenibacillus tyrfis	H4015	Crohn's Disease	0.0519729
Crohn's Disease	MTG	oxdd	A0A0F6BM85	Firmicutes	Bacilli	Bacillales	Bacillaceae	Geobacillus	Geobacillus sp. Y4.1MC1	H4015	Crohn's Disease	0.0334111
Crohn's Disease	MTG	oxdd	A0A150M124	Firmicutes	Bacilli	Bacillales	Bacillaceae	Anoxybacillus	Anoxybacillus flavithermus	H4015	Crohn's Disease	0.025791
Crohn's Disease	MTG	oxdd	A0A1I3P1H9	Firmicutes	Bacilli	Bacillales	Thermoactinomycetaceae	Thermoflavimicrobium	Thermoflavimicrobium dichotomicum	H4015	Crohn's Disease	0.0261848
Crohn's Disease	MTG	oxdd	A0A2R5ELQ1	Firmicutes	Bacilli	Bacillales	Paenibacillaceae	Paenibacillus	Paenibacillus agaridevorans	H4015	Crohn's Disease	0.0515821
Crohn's Disease	MTG	oxdd	A0A081P6G7	Firmicutes	Bacilli	Bacillales	Paenibacillaceae	Paenibacillus	Paenibacillus tyrfis	H4015	Crohn's Disease-L3	0.0519729
Crohn's Disease	MTG	oxdd	A0A0F6BM85	Firmicutes	Bacilli	Bacillales	Bacillaceae	Geobacillus	Geobacillus sp. Y4.1MC1	H4015	Crohn's Disease-L3	0.0334111
Crohn's Disease	MTG	oxdd	A0A150M124	Firmicutes	Bacilli	Bacillales	Bacillaceae	Anoxybacillus	Anoxybacillus flavithermus	H4015	Crohn's Disease-L3	0.025791
Crohn's Disease	MTG	oxdd	A0A1I3P1H9	Firmicutes	Bacilli	Bacillales	Thermoactinomycetaceae	Thermoflavimicrobium	Thermoflavimicrobium dichotomicum	H4015	Crohn's Disease-L3	0.0261848
Crohn's Disease	MTG	oxdd	A0A2R5ELQ1	Firmicutes	Bacilli	Bacillales	Paenibacillaceae	Paenibacillus	Paenibacillus agaridevorans	H4015	Crohn's Disease-L3	0.0515821
Crohn's Disease	MTG	oxdd	A0A089L2H2	Firmicutes	Bacilli	Bacillales	Paenibacillaceae	Paenibacillus	Paenibacillus sp. FSL R7-0331	H4017	Crohn's Disease	0.0253104
Crohn's Disease	MTG	oxdd	A0A1I4IHA8	Firmicutes	Bacilli	Bacillales	Paenibacillaceae	Paenibacillus	Paenibacillus sp. 1_12	H4017	Crohn's Disease	0.0255654
Crohn's Disease	MTG	oxdd	A0A089L2H2	Firmicutes	Bacilli	Bacillales	Paenibacillaceae	Paenibacillus	Paenibacillus sp. FSL R7-0331	H4017	Crohn's Disease-L3	0.0253104
Crohn's Disease	MTG	oxdd	A0A1I4IHA8	Firmicutes	Bacilli	Bacillales	Paenibacillaceae	Paenibacillus	Paenibacillus sp. 1_12	H4017	Crohn's Disease-L3	0.0255654
Crohn's Disease	MTG	oxdd	A0A1M7BDS5	Firmicutes	Clostridia	Clostridiales	Lachnospiraceae	Anaerocolumna	Anaerocolumna jejuensis DSM 15929	H4039	Crohn's Disease	0.102187
Crohn's Disease	MTG	oxdd	A0A1M7BDS5	Firmicutes	Clostridia	Clostridiales	Lachnospiraceae	Anaerocolumna	Anaerocolumna jejuensis DSM 15929	H4039	Crohn's Disease-L3	0.102187
Crohn's Disease	MTG	oxdd	A0A1M7BDS5	Firmicutes	Clostridia	Clostridiales	Lachnospiraceae	Anaerocolumna	Anaerocolumna jejuensis DSM 15929	M2014	Crohn's Disease	0.050971
Crohn's Disease	MTG	oxdd	A0A1M7BDS5	Firmicutes	Clostridia	Clostridiales	Lachnospiraceae	Anaerocolumna	Anaerocolumna jejuensis DSM 15929	M2014	Crohn's Disease-nonL3	0.050971
Crohn's Disease	MTG	oxdd	A0A2W5R7U5	Proteobacteria	Alphaproteobacteria	Rhizobiales	Xanthobacteraceae	Starkeya	Starkeya novella	M2028	Crohn's Disease	0.0300679
Crohn's Disease	MTG	oxdd	D7AA20	Proteobacteria	Alphaproteobacteria	Rhizobiales	Xanthobacteraceae	Starkeya	Starkeya novella DSM 506	M2028	Crohn's Disease	0.0300679
Crohn's Disease	MTG	oxdd	A0A2W5R7U5	Proteobacteria	Alphaproteobacteria	Rhizobiales	Xanthobacteraceae	Starkeya	Starkeya novella	M2028	Crohn's Disease-nonL3	0.0300679
Crohn's Disease	MTG	oxdd	D7AA20	Proteobacteria	Alphaproteobacteria	Rhizobiales	Xanthobacteraceae	Starkeya	Starkeya novella DSM 506	M2028	Crohn's Disease-nonL3	0.0300679
Crohn's Disease	MTS	oxdd	W6YKT1	Ascomycota	Dothideomycetes	Pleosporales	Pleosporaceae	Bipolaris	Bipolaris oryzae ATCC 44560	P6005	Crohn's Disease	0.211435
Crohn's Disease	MTS	oxdd	W6YKT1	Ascomycota	Dothideomycetes	Pleosporales	Pleosporaceae	Bipolaris	Bipolaris oryzae ATCC 44560	P6005	Crohn's Disease-L3	0.211435
Crohn's Disease	MTG	oxdd	A0A0B0IB41	Firmicutes	Bacilli	Bacillales	Paenibacillaceae	Paenibacillus	Paenibacillus sp. P1XP2	P6028	Crohn's Disease	0.0664057
Crohn's Disease	MTG	oxdd	A0A0B0IB41	Firmicutes	Bacilli	Bacillales	Paenibacillaceae	Paenibacillus	Paenibacillus sp. P1XP2	P6028	Crohn's Disease-nonL3	0.0664057
Ulcerative colitis	MTG	oxdd	A0A0E2EPN7	Firmicutes	Bacilli	Lactobacillales	Streptococcaceae	Streptococcus	Streptococcus mutans SM6	C3011	Ulcerative colitis	0.0301689
Ulcerative colitis	MTG	oxdd	A0A0E2EPN7	Firmicutes	Bacilli	Lactobacillales	Streptococcaceae	Streptococcus	Streptococcus mutans SM6	E5004	Ulcerative colitis	0.064164
Ulcerative colitis	MTG	oxdd	A0A1L7AIR2	Proteobacteria	Alphaproteobacteria	Rhodospirillales	Acetobacteraceae	Roseomonas	Roseomonas gilardii	H4010	Ulcerative colitis	0.0251453
Ulcerative colitis	MTG	oxdd	A0A0E2EPN7	Firmicutes	Bacilli	Lactobacillales	Streptococcaceae	Streptococcus	Streptococcus mutans SM6	H4019	Ulcerative colitis	0.102453
Ulcerative colitis	MTG	oxdd	A0A0E2EPN7	Firmicutes	Bacilli	Lactobacillales	Streptococcaceae	Streptococcus	Streptococcus mutans SM6	H4027	Ulcerative colitis	0.102943
Ulcerative colitis	MTG	oxdd	A0A1M7BDS5	Firmicutes	Clostridia	Clostridiales	Lachnospiraceae	Anaerocolumna	Anaerocolumna jejuensis DSM 15929	H4027	Ulcerative colitis	0.0371742
Ulcerative colitis	MTG	oxdd	A0A0J5JWP1	Firmicutes	Bacilli	Bacillales	Bacillaceae	Bacillus	Bacillus sp. LL01	M2064	Ulcerative colitis	0.0401928
Ulcerative colitis	MTG	oxdd	A0A0J5JWP1	Firmicutes	Bacilli	Bacillales	Bacillaceae	Bacillus	Bacillus sp. LL01	M2069	Ulcerative colitis	0.0257715
Ulcerative colitis	MTG	oxdd	A0A1M7BDS5	Firmicutes	Clostridia	Clostridiales	Lachnospiraceae	Anaerocolumna	Anaerocolumna jejuensis DSM 15929	M2069	Ulcerative colitis	0.0245945
Ulcerative colitis	MTG	oxdd	A0A1M7BDS5	Firmicutes	Clostridia	Clostridiales	Lachnospiraceae	Anaerocolumna	Anaerocolumna jejuensis DSM 15929	M2103	Ulcerative colitis	0.0605909
Ulcerative colitis	MTG	oxdd	A0A1A2Z6H1	Actinobacteria	Actinobacteria	Corynebacteriales	Mycobacteriaceae	Mycobacterium	Mycobacterium sp. E796	P6013	Ulcerative colitis	0.0642502
Crohn's Disease	MTG	frc	A1ADQ1	Proteobacteria	Gammaproteobacteria	Enterobacterales	Enterobacteriaceae	Escherichia	Escherichia coli APEC O1	C2014	Crohn's Disease	0.462401
Crohn's Disease	MTG	frc	A0A072MW66	Actinobacteria	Actinobacteria	Bifidobacteriales	Bifidobacteriaceae	Bifidobacterium	Bifidobacterium pseudocatenulatum IPLA36007	C2034	Crohn's Disease	0.555527
Crohn's Disease	MTG	frc	A0A087B567	Actinobacteria	Actinobacteria	Bifidobacteriales	Bifidobacteriaceae	Bifidobacterium	Bifidobacterium cuniculi	C2034	Crohn's Disease	0.154781
Crohn's Disease	MTG	frc	A0A1V8Q5N2	Actinobacteria	Actinobacteria	Bifidobacteriales	Bifidobacteriaceae	Bifidobacterium	Bifidobacterium dentium	C2034	Crohn's Disease	3.93165
Crohn's Disease	MTG	frc	A0A377BTA6	Proteobacteria	Gammaproteobacteria	Enterobacterales	Enterobacteriaceae	Escherichia	Escherichia coli	C2034	Crohn's Disease	7.54092
Crohn's Disease	MTG	frc	A1ADQ1	Proteobacteria	Gammaproteobacteria	Enterobacterales	Enterobacteriaceae	Escherichia	Escherichia coli APEC O1	C2034	Crohn's Disease	6.26342
Crohn's Disease	MTG	frc	A0A072MW66	Actinobacteria	Actinobacteria	Bifidobacteriales	Bifidobacteriaceae	Bifidobacterium	Bifidobacterium pseudocatenulatum IPLA36007	C2058	Crohn's Disease	0.0462924
Crohn's Disease	MTG	frc	A0A2X5G0L0	Proteobacteria	Gammaproteobacteria	Enterobacterales	Enterobacteriaceae	Escherichia	Escherichia coli	C2086	Crohn's Disease	0.278811
Crohn's Disease	MTG	frc	A0A377BTA6	Proteobacteria	Gammaproteobacteria	Enterobacterales	Enterobacteriaceae	Escherichia	Escherichia coli	C2086	Crohn's Disease	3.90399
Crohn's Disease	MTG	frc	A1ADQ1	Proteobacteria	Gammaproteobacteria	Enterobacterales	Enterobacteriaceae	Escherichia	Escherichia coli APEC O1	C2086	Crohn's Disease	5.25284
Crohn's Disease	MTG	frc	A0A016XI66	Proteobacteria	Betaproteobacteria	Burkholderiales	Comamonadaceae	Hylemonella	Hylemonella gracilis str. Niagara R	C3001	Crohn's Disease	0.0284028
Crohn's Disease	MTG	frc	A0A072MW66	Actinobacteria	Actinobacteria	Bifidobacteriales	Bifidobacteriaceae	Bifidobacterium	Bifidobacterium pseudocatenulatum IPLA36007	C3001	Crohn's Disease	0.155411
Crohn's Disease	MTG	frc	A0A0L7ANW7	Proteobacteria	Gammaproteobacteria	Enterobacterales	Enterobacteriaceae	Escherichia	Escherichia coli	C3001	Crohn's Disease	0.0208245
Crohn's Disease	MTG	frc	A0A377BTA6	Proteobacteria	Gammaproteobacteria	Enterobacterales	Enterobacteriaceae	Escherichia	Escherichia coli	C3001	Crohn's Disease	0.416699
Crohn's Disease	MTG	frc	A1ADQ1	Proteobacteria	Gammaproteobacteria	Enterobacterales	Enterobacteriaceae	Escherichia	Escherichia coli APEC O1	C3001	Crohn's Disease	1.10301
Crohn's Disease	MTG	frc	V0UR98	Proteobacteria	Gammaproteobacteria	Enterobacterales	Enterobacteriaceae	Escherichia	Escherichia coli 908519	C3001	Crohn's Disease	0.204999
Crohn's Disease	MTG	frc	A0A016XI66	Proteobacteria	Betaproteobacteria	Burkholderiales	Comamonadaceae	Hylemonella	Hylemonella gracilis str. Niagara R	C3001	Crohn's Disease-L3	0.0284028
Crohn's Disease	MTG	frc	A0A072MW66	Actinobacteria	Actinobacteria	Bifidobacteriales	Bifidobacteriaceae	Bifidobacterium	Bifidobacterium pseudocatenulatum IPLA36007	C3001	Crohn's Disease-L3	0.155411
Crohn's Disease	MTG	frc	A0A0L7ANW7	Proteobacteria	Gammaproteobacteria	Enterobacterales	Enterobacteriaceae	Escherichia	Escherichia coli	C3001	Crohn's Disease-L3	0.0208245
Crohn's Disease	MTG	frc	A0A377BTA6	Proteobacteria	Gammaproteobacteria	Enterobacterales	Enterobacteriaceae	Escherichia	Escherichia coli	C3001	Crohn's Disease-L3	0.416699
Crohn's Disease	MTG	frc	A1ADQ1	Proteobacteria	Gammaproteobacteria	Enterobacterales	Enterobacteriaceae	Escherichia	Escherichia coli APEC O1	C3001	Crohn's Disease-L3	1.10301
Crohn's Disease	MTG	frc	V0UR98	Proteobacteria	Gammaproteobacteria	Enterobacterales	Enterobacteriaceae	Escherichia	Escherichia coli 908519	C3001	Crohn's Disease-L3	0.204999
Crohn's Disease	MTG	frc	A1ADQ1	Proteobacteria	Gammaproteobacteria	Enterobacterales	Enterobacteriaceae	Escherichia	Escherichia coli APEC O1	C3002	Crohn's Disease	1.06365
Crohn's Disease	MTG	frc	Q3YZF6	Proteobacteria	Gammaproteobacteria	Enterobacterales	Enterobacteriaceae	Shigella	Shigella sonnei Ss046	C3002	Crohn's Disease	0.0258842
Crohn's Disease	MTG	frc	V0UR98	Proteobacteria	Gammaproteobacteria	Enterobacterales	Enterobacteriaceae	Escherichia	Escherichia coli 908519	C3002	Crohn's Disease	0.081703
Crohn's Disease	MTG	frc	A1ADQ1	Proteobacteria	Gammaproteobacteria	Enterobacterales	Enterobacteriaceae	Escherichia	Escherichia coli APEC O1	C3002	Crohn's Disease-L3	1.06365
Crohn's Disease	MTG	frc	Q3YZF6	Proteobacteria	Gammaproteobacteria	Enterobacterales	Enterobacteriaceae	Shigella	Shigella sonnei Ss046	C3002	Crohn's Disease-L3	0.0258842
Crohn's Disease	MTG	frc	V0UR98	Proteobacteria	Gammaproteobacteria	Enterobacterales	Enterobacteriaceae	Escherichia	Escherichia coli 908519	C3002	Crohn's Disease-L3	0.081703
Crohn's Disease	MTG	frc	A0A016XI66	Proteobacteria	Betaproteobacteria	Burkholderiales	Comamonadaceae	Hylemonella	Hylemonella gracilis str. Niagara R	C3007	Crohn's Disease	0.0342669
Crohn's Disease	MTG	frc	A0A028EDB1	Proteobacteria	Gammaproteobacteria	Enterobacterales	Enterobacteriaceae	Escherichia	Escherichia coli O118:H16 str. 2009C-4446	C3007	Crohn's Disease	0.0327891
Crohn's Disease	MTG	frc	A0A0B1N9J8	Proteobacteria	Gammaproteobacteria	Enterobacterales	Enterobacteriaceae	Escherichia	Escherichia coli	C3007	Crohn's Disease	0.0332706
Crohn's Disease	MTG	frc	A0A0H2QFH1	Proteobacteria	Gammaproteobacteria	Enterobacterales	Morganellaceae	Moellerella	Moellerella wisconsensis	C3007	Crohn's Disease	0.0753033
Crohn's Disease	MTG	frc	A0A0H2QXU0	Proteobacteria	Gammaproteobacteria	Enterobacterales	Morganellaceae	Moellerella	Moellerella wisconsensis	C3007	Crohn's Disease	0.0287514
Crohn's Disease	MTG	frc	A0A0L0ALL8	Proteobacteria	Gammaproteobacteria	Enterobacterales	Enterobacteriaceae	Klebsiella	Klebsiella sp. RIT-PI-d	C3007	Crohn's Disease	0.0288897
Crohn's Disease	MTG	frc	A0A109CET1	Proteobacteria	Betaproteobacteria	Burkholderiales	Comamonadaceae	Variovorax	Variovorax sp. WDL1	C3007	Crohn's Disease	0.0309739
Crohn's Disease	MTG	frc	A0A163DH69	Proteobacteria	Gammaproteobacteria	Enterobacterales	Enterobacteriaceae	Escherichia	Escherichia coli	C3007	Crohn's Disease	0.0308994
Crohn's Disease	MTG	frc	A0A1C7CW93	Proteobacteria	Gammaproteobacteria	Enterobacterales	Enterobacteriaceae	Escherichia	Escherichia coli	C3007	Crohn's Disease	0.0307516
Crohn's Disease	MTG	frc	A0A1Q6U8Z5	Proteobacteria	Alphaproteobacteria	Rhodospirillales	Rhodospirillaceae	Azospirillum	Azospirillum sp. 51_20	C3007	Crohn's Disease	0.0304601
Crohn's Disease	MTG	frc	A0A1U9T5R4	Proteobacteria	Gammaproteobacteria	Enterobacterales	Enterobacteriaceae	Escherichia	Escherichia coli	C3007	Crohn's Disease	0.0617988
Crohn's Disease	MTG	frc	A0A1X0AWU7	Actinobacteria	Actinobacteria	Corynebacteriales	Mycobacteriaceae	Mycobacterium	Mycobacterium aquaticum	C3007	Crohn's Disease	0.0308253
Crohn's Disease	MTG	frc	A0A1X3KZX2	Proteobacteria	Gammaproteobacteria	Enterobacterales	Enterobacteriaceae	Escherichia	Escherichia coli H420	C3007	Crohn's Disease	0.0308994
Crohn's Disease	MTG	frc	A0A2I6E5X4	Proteobacteria	Gammaproteobacteria	Enterobacterales	Enterobacteriaceae	Enterobacter	Enterobacter cancerogenus	C3007	Crohn's Disease	0.0308994
Crohn's Disease	MTG	frc	A0A2V7C257	Candidatus Rokubacteria	NA	NA	NA	NA	Candidatus Rokubacteria bacterium	C3007	Crohn's Disease	0.0326429
Crohn's Disease	MTG	frc	A0A377BTA6	Proteobacteria	Gammaproteobacteria	Enterobacterales	Enterobacteriaceae	Escherichia	Escherichia coli	C3007	Crohn's Disease	0.093018
Crohn's Disease	MTG	frc	A1ADQ1	Proteobacteria	Gammaproteobacteria	Enterobacterales	Enterobacteriaceae	Escherichia	Escherichia coli APEC O1	C3007	Crohn's Disease	13.998
Crohn's Disease	MTG	frc	B5YYX4	Proteobacteria	Gammaproteobacteria	Enterobacterales	Enterobacteriaceae	Escherichia	Escherichia coli O157:H7 str. EC4115	C3007	Crohn's Disease	0.0327891
Crohn's Disease	MTG	frc	K8WLE6	Proteobacteria	Gammaproteobacteria	Enterobacterales	Morganellaceae	Providencia	Providencia sneebia DSM 19967	C3007	Crohn's Disease	0.0296179
Crohn's Disease	MTG	frc	V0UR98	Proteobacteria	Gammaproteobacteria	Enterobacterales	Enterobacteriaceae	Escherichia	Escherichia coli 908519	C3007	Crohn's Disease	0.73875
Crohn's Disease	MTS	frc	A0A377BTA6	Proteobacteria	Gammaproteobacteria	Enterobacterales	Enterobacteriaceae	Escherichia	Escherichia coli	C3007	Crohn's Disease	0.0369515
Crohn's Disease	MTS	frc	A1ADQ1	Proteobacteria	Gammaproteobacteria	Enterobacterales	Enterobacteriaceae	Escherichia	Escherichia coli APEC O1	C3007	Crohn's Disease	0.182803
Crohn's Disease	MTG	frc	A0A016XI66	Proteobacteria	Betaproteobacteria	Burkholderiales	Comamonadaceae	Hylemonella	Hylemonella gracilis str. Niagara R	C3007	Crohn's Disease-nonL3	0.0342669
Crohn's Disease	MTG	frc	A0A028EDB1	Proteobacteria	Gammaproteobacteria	Enterobacterales	Enterobacteriaceae	Escherichia	Escherichia coli O118:H16 str. 2009C-4446	C3007	Crohn's Disease-nonL3	0.0327891
Crohn's Disease	MTG	frc	A0A0B1N9J8	Proteobacteria	Gammaproteobacteria	Enterobacterales	Enterobacteriaceae	Escherichia	Escherichia coli	C3007	Crohn's Disease-nonL3	0.0332706
Crohn's Disease	MTG	frc	A0A0H2QFH1	Proteobacteria	Gammaproteobacteria	Enterobacterales	Morganellaceae	Moellerella	Moellerella wisconsensis	C3007	Crohn's Disease-nonL3	0.0753033
Crohn's Disease	MTG	frc	A0A0H2QXU0	Proteobacteria	Gammaproteobacteria	Enterobacterales	Morganellaceae	Moellerella	Moellerella wisconsensis	C3007	Crohn's Disease-nonL3	0.0287514
Crohn's Disease	MTG	frc	A0A0L0ALL8	Proteobacteria	Gammaproteobacteria	Enterobacterales	Enterobacteriaceae	Klebsiella	Klebsiella sp. RIT-PI-d	C3007	Crohn's Disease-nonL3	0.0288897
Crohn's Disease	MTG	frc	A0A109CET1	Proteobacteria	Betaproteobacteria	Burkholderiales	Comamonadaceae	Variovorax	Variovorax sp. WDL1	C3007	Crohn's Disease-nonL3	0.0309739
Crohn's Disease	MTG	frc	A0A163DH69	Proteobacteria	Gammaproteobacteria	Enterobacterales	Enterobacteriaceae	Escherichia	Escherichia coli	C3007	Crohn's Disease-nonL3	0.0308994
Crohn's Disease	MTG	frc	A0A1C7CW93	Proteobacteria	Gammaproteobacteria	Enterobacterales	Enterobacteriaceae	Escherichia	Escherichia coli	C3007	Crohn's Disease-nonL3	0.0307516
Crohn's Disease	MTG	frc	A0A1Q6U8Z5	Proteobacteria	Alphaproteobacteria	Rhodospirillales	Rhodospirillaceae	Azospirillum	Azospirillum sp. 51_20	C3007	Crohn's Disease-nonL3	0.0304601
Crohn's Disease	MTG	frc	A0A1U9T5R4	Proteobacteria	Gammaproteobacteria	Enterobacterales	Enterobacteriaceae	Escherichia	Escherichia coli	C3007	Crohn's Disease-nonL3	0.0617988
Crohn's Disease	MTG	frc	A0A1X0AWU7	Actinobacteria	Actinobacteria	Corynebacteriales	Mycobacteriaceae	Mycobacterium	Mycobacterium aquaticum	C3007	Crohn's Disease-nonL3	0.0308253
Crohn's Disease	MTG	frc	A0A1X3KZX2	Proteobacteria	Gammaproteobacteria	Enterobacterales	Enterobacteriaceae	Escherichia	Escherichia coli H420	C3007	Crohn's Disease-nonL3	0.0308994
Crohn's Disease	MTG	frc	A0A2I6E5X4	Proteobacteria	Gammaproteobacteria	Enterobacterales	Enterobacteriaceae	Enterobacter	Enterobacter cancerogenus	C3007	Crohn's Disease-nonL3	0.0308994
Crohn's Disease	MTG	frc	A0A2V7C257	Candidatus Rokubacteria	NA	NA	NA	NA	Candidatus Rokubacteria bacterium	C3007	Crohn's Disease-nonL3	0.0326429
Crohn's Disease	MTG	frc	A0A377BTA6	Proteobacteria	Gammaproteobacteria	Enterobacterales	Enterobacteriaceae	Escherichia	Escherichia coli	C3007	Crohn's Disease-nonL3	0.093018
Crohn's Disease	MTG	frc	A1ADQ1	Proteobacteria	Gammaproteobacteria	Enterobacterales	Enterobacteriaceae	Escherichia	Escherichia coli APEC O1	C3007	Crohn's Disease-nonL3	13.998
Crohn's Disease	MTG	frc	B5YYX4	Proteobacteria	Gammaproteobacteria	Enterobacterales	Enterobacteriaceae	Escherichia	Escherichia coli O157:H7 str. EC4115	C3007	Crohn's Disease-nonL3	0.0327891
Crohn's Disease	MTG	frc	K8WLE6	Proteobacteria	Gammaproteobacteria	Enterobacterales	Morganellaceae	Providencia	Providencia sneebia DSM 19967	C3007	Crohn's Disease-nonL3	0.0296179
Crohn's Disease	MTG	frc	V0UR98	Proteobacteria	Gammaproteobacteria	Enterobacterales	Enterobacteriaceae	Escherichia	Escherichia coli 908519	C3007	Crohn's Disease-nonL3	0.73875
Crohn's Disease	MTS	frc	A0A377BTA6	Proteobacteria	Gammaproteobacteria	Enterobacterales	Enterobacteriaceae	Escherichia	Escherichia coli	C3007	Crohn's Disease-nonL3	0.0369515
Crohn's Disease	MTS	frc	A1ADQ1	Proteobacteria	Gammaproteobacteria	Enterobacterales	Enterobacteriaceae	Escherichia	Escherichia coli APEC O1	C3007	Crohn's Disease-nonL3	0.182803
Crohn's Disease	MTG	frc	A0A0Q4UMF0	Proteobacteria	Alphaproteobacteria	Rhizobiales	Methylobacteriaceae	Methylobacterium	Methylobacterium sp. Leaf86	C3008	Crohn's Disease	0.0326372
Crohn's Disease	MTG	frc	A0A0R1HAW1	Firmicutes	Bacilli	Lactobacillales	Lactobacillaceae	Lactobacillus	Lactobacillus amylovorus DSM 20531	C3008	Crohn's Disease	0.0328095
Crohn's Disease	MTG	frc	A0A1Q6U8Z5	Proteobacteria	Alphaproteobacteria	Rhodospirillales	Rhodospirillaceae	Azospirillum	Azospirillum sp. 51_20	C3008	Crohn's Disease	0.0848755
Crohn's Disease	MTG	frc	A0A0Q4UMF0	Proteobacteria	Alphaproteobacteria	Rhizobiales	Methylobacteriaceae	Methylobacterium	Methylobacterium sp. Leaf86	C3008	Crohn's Disease-nonL3	0.0326372
Crohn's Disease	MTG	frc	A0A0R1HAW1	Firmicutes	Bacilli	Lactobacillales	Lactobacillaceae	Lactobacillus	Lactobacillus amylovorus DSM 20531	C3008	Crohn's Disease-nonL3	0.0328095
Crohn's Disease	MTG	frc	A0A1Q6U8Z5	Proteobacteria	Alphaproteobacteria	Rhodospirillales	Rhodospirillaceae	Azospirillum	Azospirillum sp. 51_20	C3008	Crohn's Disease-nonL3	0.0848755
Crohn's Disease	MTG	frc	A0A016XI66	Proteobacteria	Betaproteobacteria	Burkholderiales	Comamonadaceae	Hylemonella	Hylemonella gracilis str. Niagara R	C3009	Crohn's Disease	0.0314037
Crohn's Disease	MTG	frc	A0A062XDE4	Firmicutes	Bacilli	Lactobacillales	Lactobacillaceae	Lactobacillus	Lactobacillus animalis	C3009	Crohn's Disease	0.0246203
Crohn's Disease	MTG	frc	A0A072MW66	Actinobacteria	Actinobacteria	Bifidobacteriales	Bifidobacteriaceae	Bifidobacterium	Bifidobacterium pseudocatenulatum IPLA36007	C3009	Crohn's Disease	0.0304493
Crohn's Disease	MTG	frc	A0A080IWR8	Proteobacteria	Gammaproteobacteria	Enterobacterales	Enterobacteriaceae	Escherichia	Escherichia coli 1-250-04_S3_C2	C3009	Crohn's Disease	0.0315545
Crohn's Disease	MTG	frc	A0A087ADU5	Actinobacteria	Actinobacteria	Bifidobacteriales	Bifidobacteriaceae	Bifidobacterium	Bifidobacterium choerinum	C3009	Crohn's Disease	0.219467
Crohn's Disease	MTG	frc	A0A087B567	Actinobacteria	Actinobacteria	Bifidobacteriales	Bifidobacteriaceae	Bifidobacterium	Bifidobacterium cuniculi	C3009	Crohn's Disease	0.034216
Crohn's Disease	MTG	frc	A0A087QB11	Firmicutes	Bacilli	Lactobacillales	Lactobacillaceae	Lactobacillus	Lactobacillus gasseri SV-16A-US	C3009	Crohn's Disease	0.0912782
Crohn's Disease	MTG	frc	A0A0A7I974	Actinobacteria	Actinobacteria	Bifidobacteriales	Bifidobacteriaceae	Bifidobacterium	Bifidobacterium pseudolongum PV8-2	C3009	Crohn's Disease	0.0493535
Crohn's Disease	MTG	frc	A0A0D6FY31	Actinobacteria	Actinobacteria	Corynebacteriales	Mycobacteriaceae	Mycolicibacterium	Mycolicibacterium smegmatis	C3009	Crohn's Disease	0.0369235
Crohn's Disease	MTG	frc	A0A0H2QFH1	Proteobacteria	Gammaproteobacteria	Enterobacterales	Morganellaceae	Moellerella	Moellerella wisconsensis	C3009	Crohn's Disease	0.0264779
Crohn's Disease	MTG	frc	A0A0L7BLA3	Actinobacteria	Actinobacteria	Bifidobacteriales	Bifidobacteriaceae	Bifidobacterium	Bifidobacterium animalis subsp. animalis MCC 0483	C3009	Crohn's Disease	0.0443175
Crohn's Disease	MTG	frc	A0A0R1HAW1	Firmicutes	Bacilli	Lactobacillales	Lactobacillaceae	Lactobacillus	Lactobacillus amylovorus DSM 20531	C3009	Crohn's Disease	0.0635763
Crohn's Disease	MTG	frc	A0A0R1UH43	Firmicutes	Bacilli	Lactobacillales	Lactobacillaceae	Lactobacillus	Lactobacillus kalixensis DSM 16043	C3009	Crohn's Disease	0.0963623
Crohn's Disease	MTG	frc	A0A127ER80	Proteobacteria	Alphaproteobacteria	Rhizobiales	Hyphomicrobiaceae	Rhodoplanes	Rhodoplanes sp. Z2-YC6860	C3009	Crohn's Disease	0.0214437
Crohn's Disease	MTG	frc	A0A1E3SB62	Actinobacteria	Actinobacteria	Corynebacteriales	Mycobacteriaceae	Mycobacterium	Mycobacterium sherrisii	C3009	Crohn's Disease	0.0314785
Crohn's Disease	MTG	frc	A0A1Q6EIZ9	Bacteroidetes	Bacteroidia	Bacteroidales	NA	NA	Bacteroidales bacterium 52_46	C3009	Crohn's Disease	0.0460851
Crohn's Disease	MTG	frc	A0A1V8Q5N2	Actinobacteria	Actinobacteria	Bifidobacteriales	Bifidobacteriaceae	Bifidobacterium	Bifidobacterium dentium	C3009	Crohn's Disease	0.130829
Crohn's Disease	MTG	frc	A0A209A2M1	Proteobacteria	Gammaproteobacteria	Enterobacterales	Yersiniaceae	Yersinia	Yersinia frederiksenii	C3009	Crohn's Disease	0.0352198
Crohn's Disease	MTG	frc	A0A248X7K1	Actinobacteria	Actinobacteria	Bifidobacteriales	Bifidobacteriaceae	Bifidobacterium	Bifidobacterium pseudolongum	C3009	Crohn's Disease	0.043514
Crohn's Disease	MTG	frc	A0A2A2EHW6	Actinobacteria	Actinobacteria	Bifidobacteriales	Bifidobacteriaceae	Bifidobacterium	Bifidobacterium criceti	C3009	Crohn's Disease	0.0823983
Crohn's Disease	MTG	frc	A0A2V1J0Z5	Bacteroidetes	Bacteroidia	Bacteroidales	Muribaculaceae	NA	Muribaculaceae bacterium DSM 100764	C3009	Crohn's Disease	0.092597
Crohn's Disease	MTG	frc	A0A330CV66	Proteobacteria	Gammaproteobacteria	Enterobacterales	Enterobacteriaceae	Escherichia	Escherichia coli	C3009	Crohn's Disease	0.0480792
Crohn's Disease	MTG	frc	A0A354HZG4	Bacteroidetes	Bacteroidia	Bacteroidales	Porphyromonadaceae	NA	Porphyromonadaceae bacterium	C3009	Crohn's Disease	0.0464059
Crohn's Disease	MTG	frc	A0A377BTA6	Proteobacteria	Gammaproteobacteria	Enterobacterales	Enterobacteriaceae	Escherichia	Escherichia coli	C3009	Crohn's Disease	11.7941
Crohn's Disease	MTG	frc	A1ADQ1	Proteobacteria	Gammaproteobacteria	Enterobacterales	Enterobacteriaceae	Escherichia	Escherichia coli APEC O1	C3009	Crohn's Disease	9.9711
Crohn's Disease	MTG	frc	B5YYX4	Proteobacteria	Gammaproteobacteria	Enterobacterales	Enterobacteriaceae	Escherichia	Escherichia coli O157:H7 str. EC4115	C3009	Crohn's Disease	1.10498
Crohn's Disease	MTG	frc	G1U9U4	Firmicutes	Bacilli	Lactobacillales	Lactobacillaceae	Lactobacillus	Lactobacillus acidophilus	C3009	Crohn's Disease	0.215789
Crohn's Disease	MTG	frc	R5AR18	Bacteroidetes	Bacteroidia	Bacteroidales	Prevotellaceae	Prevotella	Prevotella sp. CAG:1031	C3009	Crohn's Disease	0.0917475
Crohn's Disease	MTG	frc	R5AXI8	Bacteroidetes	Bacteroidia	Bacteroidales	Bacteroidaceae	Bacteroides	Bacteroides sp. CAG:927	C3009	Crohn's Disease	0.0464059
Crohn's Disease	MTS	frc	A0A087ADU5	Actinobacteria	Actinobacteria	Bifidobacteriales	Bifidobacteriaceae	Bifidobacterium	Bifidobacterium choerinum	C3009	Crohn's Disease	0.17434
Crohn's Disease	MTS	frc	A0A0L7BLA3	Actinobacteria	Actinobacteria	Bifidobacteriales	Bifidobacteriaceae	Bifidobacterium	Bifidobacterium animalis subsp. animalis MCC 0483	C3009	Crohn's Disease	0.0836878
Crohn's Disease	MTS	frc	A0A0R1HAW1	Firmicutes	Bacilli	Lactobacillales	Lactobacillaceae	Lactobacillus	Lactobacillus amylovorus DSM 20531	C3009	Crohn's Disease	0.126127
Crohn's Disease	MTS	frc	A0A2A2EHW6	Actinobacteria	Actinobacteria	Bifidobacteriales	Bifidobacteriaceae	Bifidobacterium	Bifidobacterium criceti	C3009	Crohn's Disease	0.0831249
Crohn's Disease	MTS	frc	A0A354HZG4	Bacteroidetes	Bacteroidia	Bacteroidales	Porphyromonadaceae	NA	Porphyromonadaceae bacterium	C3009	Crohn's Disease	0.0682947
Crohn's Disease	MTS	frc	A0A377BTA6	Proteobacteria	Gammaproteobacteria	Enterobacterales	Enterobacteriaceae	Escherichia	Escherichia coli	C3009	Crohn's Disease	0.57863
Crohn's Disease	MTS	frc	A1ADQ1	Proteobacteria	Gammaproteobacteria	Enterobacterales	Enterobacteriaceae	Escherichia	Escherichia coli APEC O1	C3009	Crohn's Disease	0.0972028
Crohn's Disease	MTS	frc	R5AR18	Bacteroidetes	Bacteroidia	Bacteroidales	Prevotellaceae	Prevotella	Prevotella sp. CAG:1031	C3009	Crohn's Disease	0.0675115
Crohn's Disease	MTS	frc	R5AXI8	Bacteroidetes	Bacteroidia	Bacteroidales	Bacteroidaceae	Bacteroides	Bacteroides sp. CAG:927	C3009	Crohn's Disease	0.136589
Crohn's Disease	MTG	frc	A0A016XI66	Proteobacteria	Betaproteobacteria	Burkholderiales	Comamonadaceae	Hylemonella	Hylemonella gracilis str. Niagara R	C3009	Crohn's Disease-L3	0.0314037
Crohn's Disease	MTG	frc	A0A062XDE4	Firmicutes	Bacilli	Lactobacillales	Lactobacillaceae	Lactobacillus	Lactobacillus animalis	C3009	Crohn's Disease-L3	0.0246203
Crohn's Disease	MTG	frc	A0A072MW66	Actinobacteria	Actinobacteria	Bifidobacteriales	Bifidobacteriaceae	Bifidobacterium	Bifidobacterium pseudocatenulatum IPLA36007	C3009	Crohn's Disease-L3	0.0304493
Crohn's Disease	MTG	frc	A0A080IWR8	Proteobacteria	Gammaproteobacteria	Enterobacterales	Enterobacteriaceae	Escherichia	Escherichia coli 1-250-04_S3_C2	C3009	Crohn's Disease-L3	0.0315545
Crohn's Disease	MTG	frc	A0A087ADU5	Actinobacteria	Actinobacteria	Bifidobacteriales	Bifidobacteriaceae	Bifidobacterium	Bifidobacterium choerinum	C3009	Crohn's Disease-L3	0.219467
Crohn's Disease	MTG	frc	A0A087B567	Actinobacteria	Actinobacteria	Bifidobacteriales	Bifidobacteriaceae	Bifidobacterium	Bifidobacterium cuniculi	C3009	Crohn's Disease-L3	0.034216
Crohn's Disease	MTG	frc	A0A087QB11	Firmicutes	Bacilli	Lactobacillales	Lactobacillaceae	Lactobacillus	Lactobacillus gasseri SV-16A-US	C3009	Crohn's Disease-L3	0.0912782
Crohn's Disease	MTG	frc	A0A0A7I974	Actinobacteria	Actinobacteria	Bifidobacteriales	Bifidobacteriaceae	Bifidobacterium	Bifidobacterium pseudolongum PV8-2	C3009	Crohn's Disease-L3	0.0493535
Crohn's Disease	MTG	frc	A0A0D6FY31	Actinobacteria	Actinobacteria	Corynebacteriales	Mycobacteriaceae	Mycolicibacterium	Mycolicibacterium smegmatis	C3009	Crohn's Disease-L3	0.0369235
Crohn's Disease	MTG	frc	A0A0H2QFH1	Proteobacteria	Gammaproteobacteria	Enterobacterales	Morganellaceae	Moellerella	Moellerella wisconsensis	C3009	Crohn's Disease-L3	0.0264779
Crohn's Disease	MTG	frc	A0A0L7BLA3	Actinobacteria	Actinobacteria	Bifidobacteriales	Bifidobacteriaceae	Bifidobacterium	Bifidobacterium animalis subsp. animalis MCC 0483	C3009	Crohn's Disease-L3	0.0443175
Crohn's Disease	MTG	frc	A0A0R1HAW1	Firmicutes	Bacilli	Lactobacillales	Lactobacillaceae	Lactobacillus	Lactobacillus amylovorus DSM 20531	C3009	Crohn's Disease-L3	0.0635763
Crohn's Disease	MTG	frc	A0A0R1UH43	Firmicutes	Bacilli	Lactobacillales	Lactobacillaceae	Lactobacillus	Lactobacillus kalixensis DSM 16043	C3009	Crohn's Disease-L3	0.0963623
Crohn's Disease	MTG	frc	A0A127ER80	Proteobacteria	Alphaproteobacteria	Rhizobiales	Hyphomicrobiaceae	Rhodoplanes	Rhodoplanes sp. Z2-YC6860	C3009	Crohn's Disease-L3	0.0214437
Crohn's Disease	MTG	frc	A0A1E3SB62	Actinobacteria	Actinobacteria	Corynebacteriales	Mycobacteriaceae	Mycobacterium	Mycobacterium sherrisii	C3009	Crohn's Disease-L3	0.0314785
Crohn's Disease	MTG	frc	A0A1Q6EIZ9	Bacteroidetes	Bacteroidia	Bacteroidales	NA	NA	Bacteroidales bacterium 52_46	C3009	Crohn's Disease-L3	0.0460851
Crohn's Disease	MTG	frc	A0A1V8Q5N2	Actinobacteria	Actinobacteria	Bifidobacteriales	Bifidobacteriaceae	Bifidobacterium	Bifidobacterium dentium	C3009	Crohn's Disease-L3	0.130829
Crohn's Disease	MTG	frc	A0A209A2M1	Proteobacteria	Gammaproteobacteria	Enterobacterales	Yersiniaceae	Yersinia	Yersinia frederiksenii	C3009	Crohn's Disease-L3	0.0352198
Crohn's Disease	MTG	frc	A0A248X7K1	Actinobacteria	Actinobacteria	Bifidobacteriales	Bifidobacteriaceae	Bifidobacterium	Bifidobacterium pseudolongum	C3009	Crohn's Disease-L3	0.043514
Crohn's Disease	MTG	frc	A0A2A2EHW6	Actinobacteria	Actinobacteria	Bifidobacteriales	Bifidobacteriaceae	Bifidobacterium	Bifidobacterium criceti	C3009	Crohn's Disease-L3	0.0823983
Crohn's Disease	MTG	frc	A0A2V1J0Z5	Bacteroidetes	Bacteroidia	Bacteroidales	Muribaculaceae	NA	Muribaculaceae bacterium DSM 100764	C3009	Crohn's Disease-L3	0.092597
Crohn's Disease	MTG	frc	A0A330CV66	Proteobacteria	Gammaproteobacteria	Enterobacterales	Enterobacteriaceae	Escherichia	Escherichia coli	C3009	Crohn's Disease-L3	0.0480792
Crohn's Disease	MTG	frc	A0A354HZG4	Bacteroidetes	Bacteroidia	Bacteroidales	Porphyromonadaceae	NA	Porphyromonadaceae bacterium	C3009	Crohn's Disease-L3	0.0464059
Crohn's Disease	MTG	frc	A0A377BTA6	Proteobacteria	Gammaproteobacteria	Enterobacterales	Enterobacteriaceae	Escherichia	Escherichia coli	C3009	Crohn's Disease-L3	11.7941
Crohn's Disease	MTG	frc	A1ADQ1	Proteobacteria	Gammaproteobacteria	Enterobacterales	Enterobacteriaceae	Escherichia	Escherichia coli APEC O1	C3009	Crohn's Disease-L3	9.9711
Crohn's Disease	MTG	frc	B5YYX4	Proteobacteria	Gammaproteobacteria	Enterobacterales	Enterobacteriaceae	Escherichia	Escherichia coli O157:H7 str. EC4115	C3009	Crohn's Disease-L3	1.10498
Crohn's Disease	MTG	frc	G1U9U4	Firmicutes	Bacilli	Lactobacillales	Lactobacillaceae	Lactobacillus	Lactobacillus acidophilus	C3009	Crohn's Disease-L3	0.215789
Crohn's Disease	MTG	frc	R5AR18	Bacteroidetes	Bacteroidia	Bacteroidales	Prevotellaceae	Prevotella	Prevotella sp. CAG:1031	C3009	Crohn's Disease-L3	0.0917475
Crohn's Disease	MTG	frc	R5AXI8	Bacteroidetes	Bacteroidia	Bacteroidales	Bacteroidaceae	Bacteroides	Bacteroides sp. CAG:927	C3009	Crohn's Disease-L3	0.0464059
Crohn's Disease	MTS	frc	A0A087ADU5	Actinobacteria	Actinobacteria	Bifidobacteriales	Bifidobacteriaceae	Bifidobacterium	Bifidobacterium choerinum	C3009	Crohn's Disease-L3	0.17434
Crohn's Disease	MTS	frc	A0A0L7BLA3	Actinobacteria	Actinobacteria	Bifidobacteriales	Bifidobacteriaceae	Bifidobacterium	Bifidobacterium animalis subsp. animalis MCC 0483	C3009	Crohn's Disease-L3	0.0836878
Crohn's Disease	MTS	frc	A0A0R1HAW1	Firmicutes	Bacilli	Lactobacillales	Lactobacillaceae	Lactobacillus	Lactobacillus amylovorus DSM 20531	C3009	Crohn's Disease-L3	0.126127
Crohn's Disease	MTS	frc	A0A2A2EHW6	Actinobacteria	Actinobacteria	Bifidobacteriales	Bifidobacteriaceae	Bifidobacterium	Bifidobacterium criceti	C3009	Crohn's Disease-L3	0.0831249
Crohn's Disease	MTS	frc	A0A354HZG4	Bacteroidetes	Bacteroidia	Bacteroidales	Porphyromonadaceae	NA	Porphyromonadaceae bacterium	C3009	Crohn's Disease-L3	0.0682947
Crohn's Disease	MTS	frc	A0A377BTA6	Proteobacteria	Gammaproteobacteria	Enterobacterales	Enterobacteriaceae	Escherichia	Escherichia coli	C3009	Crohn's Disease-L3	0.57863
Crohn's Disease	MTS	frc	A1ADQ1	Proteobacteria	Gammaproteobacteria	Enterobacterales	Enterobacteriaceae	Escherichia	Escherichia coli APEC O1	C3009	Crohn's Disease-L3	0.0972028
Crohn's Disease	MTS	frc	R5AR18	Bacteroidetes	Bacteroidia	Bacteroidales	Prevotellaceae	Prevotella	Prevotella sp. CAG:1031	C3009	Crohn's Disease-L3	0.0675115
Crohn's Disease	MTS	frc	R5AXI8	Bacteroidetes	Bacteroidia	Bacteroidales	Bacteroidaceae	Bacteroides	Bacteroides sp. CAG:927	C3009	Crohn's Disease-L3	0.136589
Crohn's Disease	MTG	frc	A0A087ADU5	Actinobacteria	Actinobacteria	Bifidobacteriales	Bifidobacteriaceae	Bifidobacterium	Bifidobacterium choerinum	C3010	Crohn's Disease	0.0491823
Crohn's Disease	MTG	frc	A0A087B567	Actinobacteria	Actinobacteria	Bifidobacteriales	Bifidobacteriaceae	Bifidobacterium	Bifidobacterium cuniculi	C3010	Crohn's Disease	0.0501433
Crohn's Disease	MTG	frc	A0A1B1SBJ2	Bacteroidetes	Bacteroidia	Bacteroidales	Muribaculaceae	Muribaculum	Muribaculum intestinale	C3010	Crohn's Disease	0.212341
Crohn's Disease	MTG	frc	A0A1Q6EIZ9	Bacteroidetes	Bacteroidia	Bacteroidales	NA	NA	Bacteroidales bacterium 52_46	C3010	Crohn's Disease	0.123324
Crohn's Disease	MTG	frc	A0A2V1IPP0	Bacteroidetes	Bacteroidia	Bacteroidales	Muribaculaceae	NA	Muribaculaceae bacterium DSM 103720	C3010	Crohn's Disease	0.608891
Crohn's Disease	MTG	frc	A0A2V1J0Z5	Bacteroidetes	Bacteroidia	Bacteroidales	Muribaculaceae	NA	Muribaculaceae bacterium DSM 100764	C3010	Crohn's Disease	0.417754
Crohn's Disease	MTG	frc	A0A354HZG4	Bacteroidetes	Bacteroidia	Bacteroidales	Porphyromonadaceae	NA	Porphyromonadaceae bacterium	C3010	Crohn's Disease	0.813037
Crohn's Disease	MTG	frc	A0A355Z7A2	Bacteroidetes	Bacteroidia	Bacteroidales	Porphyromonadaceae	NA	Porphyromonadaceae bacterium	C3010	Crohn's Disease	0.287869
Crohn's Disease	MTG	frc	A0A377BTA6	Proteobacteria	Gammaproteobacteria	Enterobacterales	Enterobacteriaceae	Escherichia	Escherichia coli	C3010	Crohn's Disease	0.321833
Crohn's Disease	MTG	frc	A1ADQ1	Proteobacteria	Gammaproteobacteria	Enterobacterales	Enterobacteriaceae	Escherichia	Escherichia coli APEC O1	C3010	Crohn's Disease	0.185833
Crohn's Disease	MTG	frc	B5YYX4	Proteobacteria	Gammaproteobacteria	Enterobacterales	Enterobacteriaceae	Escherichia	Escherichia coli O157:H7 str. EC4115	C3010	Crohn's Disease	0.119362
Crohn's Disease	MTG	frc	C3X762	Proteobacteria	Betaproteobacteria	Burkholderiales	Oxalobacteraceae	Oxalobacter	Oxalobacter formigenes HOxBLS	C3010	Crohn's Disease	0.15703
Crohn's Disease	MTG	frc	G1U9U4	Firmicutes	Bacilli	Lactobacillales	Lactobacillaceae	Lactobacillus	Lactobacillus acidophilus	C3010	Crohn's Disease	0.0270497
Crohn's Disease	MTG	frc	O06644	Proteobacteria	Betaproteobacteria	Burkholderiales	Oxalobacteraceae	Oxalobacter	Oxalobacter formigenes	C3010	Crohn's Disease	0.103677
Crohn's Disease	MTG	frc	R5AR18	Bacteroidetes	Bacteroidia	Bacteroidales	Prevotellaceae	Prevotella	Prevotella sp. CAG:1031	C3010	Crohn's Disease	0.509714
Crohn's Disease	MTG	frc	R5AXI8	Bacteroidetes	Bacteroidia	Bacteroidales	Bacteroidaceae	Bacteroides	Bacteroides sp. CAG:927	C3010	Crohn's Disease	0.551737
Crohn's Disease	MTS	frc	A0A1B1SBJ2	Bacteroidetes	Bacteroidia	Bacteroidales	Muribaculaceae	Muribaculum	Muribaculum intestinale	C3010	Crohn's Disease	0.185551
Crohn's Disease	MTS	frc	A0A1F3YTU9	Proteobacteria	Betaproteobacteria	NA	NA	NA	Betaproteobacteria bacterium RBG_16_64_18	C3010	Crohn's Disease	0.0244898
Crohn's Disease	MTS	frc	A0A1Q6EIZ9	Bacteroidetes	Bacteroidia	Bacteroidales	NA	NA	Bacteroidales bacterium 52_46	C3010	Crohn's Disease	0.220914
Crohn's Disease	MTS	frc	A0A2V1IPP0	Bacteroidetes	Bacteroidia	Bacteroidales	Muribaculaceae	NA	Muribaculaceae bacterium DSM 103720	C3010	Crohn's Disease	0.28215
Crohn's Disease	MTS	frc	A0A2V1J0Z5	Bacteroidetes	Bacteroidia	Bacteroidales	Muribaculaceae	NA	Muribaculaceae bacterium DSM 100764	C3010	Crohn's Disease	0.330892
Crohn's Disease	MTS	frc	A0A354HZG4	Bacteroidetes	Bacteroidia	Bacteroidales	Porphyromonadaceae	NA	Porphyromonadaceae bacterium	C3010	Crohn's Disease	0.367901
Crohn's Disease	MTS	frc	A0A355Z7A2	Bacteroidetes	Bacteroidia	Bacteroidales	Porphyromonadaceae	NA	Porphyromonadaceae bacterium	C3010	Crohn's Disease	0.218017
Crohn's Disease	MTS	frc	A0A377BTA6	Proteobacteria	Gammaproteobacteria	Enterobacterales	Enterobacteriaceae	Escherichia	Escherichia coli	C3010	Crohn's Disease	0.0798096
Crohn's Disease	MTS	frc	C3X762	Proteobacteria	Betaproteobacteria	Burkholderiales	Oxalobacteraceae	Oxalobacter	Oxalobacter formigenes HOxBLS	C3010	Crohn's Disease	0.433629
Crohn's Disease	MTS	frc	H1RYM1	Proteobacteria	Betaproteobacteria	Burkholderiales	Burkholderiaceae	Cupriavidus	Cupriavidus basilensis OR16	C3010	Crohn's Disease	0.0289708
Crohn's Disease	MTS	frc	O06644	Proteobacteria	Betaproteobacteria	Burkholderiales	Oxalobacteraceae	Oxalobacter	Oxalobacter formigenes	C3010	Crohn's Disease	0.555233
Crohn's Disease	MTS	frc	R5AR18	Bacteroidetes	Bacteroidia	Bacteroidales	Prevotellaceae	Prevotella	Prevotella sp. CAG:1031	C3010	Crohn's Disease	0.289657
Crohn's Disease	MTS	frc	R5AXI8	Bacteroidetes	Bacteroidia	Bacteroidales	Bacteroidaceae	Bacteroides	Bacteroides sp. CAG:927	C3010	Crohn's Disease	0.380273
Crohn's Disease	MTG	frc	A0A087ADU5	Actinobacteria	Actinobacteria	Bifidobacteriales	Bifidobacteriaceae	Bifidobacterium	Bifidobacterium choerinum	C3010	Crohn's Disease-L3	0.0491823
Crohn's Disease	MTG	frc	A0A087B567	Actinobacteria	Actinobacteria	Bifidobacteriales	Bifidobacteriaceae	Bifidobacterium	Bifidobacterium cuniculi	C3010	Crohn's Disease-L3	0.0501433
Crohn's Disease	MTG	frc	A0A1B1SBJ2	Bacteroidetes	Bacteroidia	Bacteroidales	Muribaculaceae	Muribaculum	Muribaculum intestinale	C3010	Crohn's Disease-L3	0.212341
Crohn's Disease	MTG	frc	A0A1Q6EIZ9	Bacteroidetes	Bacteroidia	Bacteroidales	NA	NA	Bacteroidales bacterium 52_46	C3010	Crohn's Disease-L3	0.123324
Crohn's Disease	MTG	frc	A0A2V1IPP0	Bacteroidetes	Bacteroidia	Bacteroidales	Muribaculaceae	NA	Muribaculaceae bacterium DSM 103720	C3010	Crohn's Disease-L3	0.608891
Crohn's Disease	MTG	frc	A0A2V1J0Z5	Bacteroidetes	Bacteroidia	Bacteroidales	Muribaculaceae	NA	Muribaculaceae bacterium DSM 100764	C3010	Crohn's Disease-L3	0.417754
Crohn's Disease	MTG	frc	A0A354HZG4	Bacteroidetes	Bacteroidia	Bacteroidales	Porphyromonadaceae	NA	Porphyromonadaceae bacterium	C3010	Crohn's Disease-L3	0.813037
Crohn's Disease	MTG	frc	A0A355Z7A2	Bacteroidetes	Bacteroidia	Bacteroidales	Porphyromonadaceae	NA	Porphyromonadaceae bacterium	C3010	Crohn's Disease-L3	0.287869
Crohn's Disease	MTG	frc	A0A377BTA6	Proteobacteria	Gammaproteobacteria	Enterobacterales	Enterobacteriaceae	Escherichia	Escherichia coli	C3010	Crohn's Disease-L3	0.321833
Crohn's Disease	MTG	frc	A1ADQ1	Proteobacteria	Gammaproteobacteria	Enterobacterales	Enterobacteriaceae	Escherichia	Escherichia coli APEC O1	C3010	Crohn's Disease-L3	0.185833
Crohn's Disease	MTG	frc	B5YYX4	Proteobacteria	Gammaproteobacteria	Enterobacterales	Enterobacteriaceae	Escherichia	Escherichia coli O157:H7 str. EC4115	C3010	Crohn's Disease-L3	0.119362
Crohn's Disease	MTG	frc	C3X762	Proteobacteria	Betaproteobacteria	Burkholderiales	Oxalobacteraceae	Oxalobacter	Oxalobacter formigenes HOxBLS	C3010	Crohn's Disease-L3	0.15703
Crohn's Disease	MTG	frc	G1U9U4	Firmicutes	Bacilli	Lactobacillales	Lactobacillaceae	Lactobacillus	Lactobacillus acidophilus	C3010	Crohn's Disease-L3	0.0270497
Crohn's Disease	MTG	frc	O06644	Proteobacteria	Betaproteobacteria	Burkholderiales	Oxalobacteraceae	Oxalobacter	Oxalobacter formigenes	C3010	Crohn's Disease-L3	0.103677
Crohn's Disease	MTG	frc	R5AR18	Bacteroidetes	Bacteroidia	Bacteroidales	Prevotellaceae	Prevotella	Prevotella sp. CAG:1031	C3010	Crohn's Disease-L3	0.509714
Crohn's Disease	MTG	frc	R5AXI8	Bacteroidetes	Bacteroidia	Bacteroidales	Bacteroidaceae	Bacteroides	Bacteroides sp. CAG:927	C3010	Crohn's Disease-L3	0.551737
Crohn's Disease	MTS	frc	A0A1B1SBJ2	Bacteroidetes	Bacteroidia	Bacteroidales	Muribaculaceae	Muribaculum	Muribaculum intestinale	C3010	Crohn's Disease-L3	0.185551
Crohn's Disease	MTS	frc	A0A1F3YTU9	Proteobacteria	Betaproteobacteria	NA	NA	NA	Betaproteobacteria bacterium RBG_16_64_18	C3010	Crohn's Disease-L3	0.0244898
Crohn's Disease	MTS	frc	A0A1Q6EIZ9	Bacteroidetes	Bacteroidia	Bacteroidales	NA	NA	Bacteroidales bacterium 52_46	C3010	Crohn's Disease-L3	0.220914
Crohn's Disease	MTS	frc	A0A2V1IPP0	Bacteroidetes	Bacteroidia	Bacteroidales	Muribaculaceae	NA	Muribaculaceae bacterium DSM 103720	C3010	Crohn's Disease-L3	0.28215
Crohn's Disease	MTS	frc	A0A2V1J0Z5	Bacteroidetes	Bacteroidia	Bacteroidales	Muribaculaceae	NA	Muribaculaceae bacterium DSM 100764	C3010	Crohn's Disease-L3	0.330892
Crohn's Disease	MTS	frc	A0A354HZG4	Bacteroidetes	Bacteroidia	Bacteroidales	Porphyromonadaceae	NA	Porphyromonadaceae bacterium	C3010	Crohn's Disease-L3	0.367901
Crohn's Disease	MTS	frc	A0A355Z7A2	Bacteroidetes	Bacteroidia	Bacteroidales	Porphyromonadaceae	NA	Porphyromonadaceae bacterium	C3010	Crohn's Disease-L3	0.218017
Crohn's Disease	MTS	frc	A0A377BTA6	Proteobacteria	Gammaproteobacteria	Enterobacterales	Enterobacteriaceae	Escherichia	Escherichia coli	C3010	Crohn's Disease-L3	0.0798096
Crohn's Disease	MTS	frc	C3X762	Proteobacteria	Betaproteobacteria	Burkholderiales	Oxalobacteraceae	Oxalobacter	Oxalobacter formigenes HOxBLS	C3010	Crohn's Disease-L3	0.433629
Crohn's Disease	MTS	frc	H1RYM1	Proteobacteria	Betaproteobacteria	Burkholderiales	Burkholderiaceae	Cupriavidus	Cupriavidus basilensis OR16	C3010	Crohn's Disease-L3	0.0289708
Crohn's Disease	MTS	frc	O06644	Proteobacteria	Betaproteobacteria	Burkholderiales	Oxalobacteraceae	Oxalobacter	Oxalobacter formigenes	C3010	Crohn's Disease-L3	0.555233
Crohn's Disease	MTS	frc	R5AR18	Bacteroidetes	Bacteroidia	Bacteroidales	Prevotellaceae	Prevotella	Prevotella sp. CAG:1031	C3010	Crohn's Disease-L3	0.289657
Crohn's Disease	MTS	frc	R5AXI8	Bacteroidetes	Bacteroidia	Bacteroidales	Bacteroidaceae	Bacteroides	Bacteroides sp. CAG:927	C3010	Crohn's Disease-L3	0.380273
Crohn's Disease	MTG	frc	A0A377BTA6	Proteobacteria	Gammaproteobacteria	Enterobacterales	Enterobacteriaceae	Escherichia	Escherichia coli	C3012	Crohn's Disease	0.41518
Crohn's Disease	MTG	frc	A1ADQ1	Proteobacteria	Gammaproteobacteria	Enterobacterales	Enterobacteriaceae	Escherichia	Escherichia coli APEC O1	C3012	Crohn's Disease	0.269197
Crohn's Disease	MTG	frc	A0A377BTA6	Proteobacteria	Gammaproteobacteria	Enterobacterales	Enterobacteriaceae	Escherichia	Escherichia coli	C3012	Crohn's Disease-nonL3	0.41518
Crohn's Disease	MTG	frc	A1ADQ1	Proteobacteria	Gammaproteobacteria	Enterobacterales	Enterobacteriaceae	Escherichia	Escherichia coli APEC O1	C3012	Crohn's Disease-nonL3	0.269197
Crohn's Disease	MTG	frc	A0A1F3YTU9	Proteobacteria	Betaproteobacteria	NA	NA	NA	Betaproteobacteria bacterium RBG_16_64_18	C3016	Crohn's Disease	0.0675349
Crohn's Disease	MTG	frc	A0A377BTA6	Proteobacteria	Gammaproteobacteria	Enterobacterales	Enterobacteriaceae	Escherichia	Escherichia coli	C3016	Crohn's Disease	0.371853
Crohn's Disease	MTG	frc	A1ADQ1	Proteobacteria	Gammaproteobacteria	Enterobacterales	Enterobacteriaceae	Escherichia	Escherichia coli APEC O1	C3016	Crohn's Disease	0.37557
Crohn's Disease	MTG	frc	C3X2D4	Proteobacteria	Betaproteobacteria	Burkholderiales	Oxalobacteraceae	Oxalobacter	Oxalobacter formigenes HOxBLS	C3016	Crohn's Disease	0.0226717
Crohn's Disease	MTG	frc	C3X762	Proteobacteria	Betaproteobacteria	Burkholderiales	Oxalobacteraceae	Oxalobacter	Oxalobacter formigenes HOxBLS	C3016	Crohn's Disease	0.232723
Crohn's Disease	MTG	frc	H1RYM1	Proteobacteria	Betaproteobacteria	Burkholderiales	Burkholderiaceae	Cupriavidus	Cupriavidus basilensis OR16	C3016	Crohn's Disease	0.0192532
Crohn's Disease	MTG	frc	O06644	Proteobacteria	Betaproteobacteria	Burkholderiales	Oxalobacteraceae	Oxalobacter	Oxalobacter formigenes	C3016	Crohn's Disease	0.243626
Crohn's Disease	MTS	frc	A0A377BTA6	Proteobacteria	Gammaproteobacteria	Enterobacterales	Enterobacteriaceae	Escherichia	Escherichia coli	C3016	Crohn's Disease	0.218332
Crohn's Disease	MTS	frc	C3X762	Proteobacteria	Betaproteobacteria	Burkholderiales	Oxalobacteraceae	Oxalobacter	Oxalobacter formigenes HOxBLS	C3016	Crohn's Disease	1.48329
Crohn's Disease	MTS	frc	H1RYM1	Proteobacteria	Betaproteobacteria	Burkholderiales	Burkholderiaceae	Cupriavidus	Cupriavidus basilensis OR16	C3016	Crohn's Disease	0.0265679
Crohn's Disease	MTS	frc	O06644	Proteobacteria	Betaproteobacteria	Burkholderiales	Oxalobacteraceae	Oxalobacter	Oxalobacter formigenes	C3016	Crohn's Disease	1.35238
Crohn's Disease	MTG	frc	A0A1F3YTU9	Proteobacteria	Betaproteobacteria	NA	NA	NA	Betaproteobacteria bacterium RBG_16_64_18	C3016	Crohn's Disease-nonL3	0.0675349
Crohn's Disease	MTG	frc	A0A377BTA6	Proteobacteria	Gammaproteobacteria	Enterobacterales	Enterobacteriaceae	Escherichia	Escherichia coli	C3016	Crohn's Disease-nonL3	0.371853
Crohn's Disease	MTG	frc	A1ADQ1	Proteobacteria	Gammaproteobacteria	Enterobacterales	Enterobacteriaceae	Escherichia	Escherichia coli APEC O1	C3016	Crohn's Disease-nonL3	0.37557
Crohn's Disease	MTG	frc	C3X2D4	Proteobacteria	Betaproteobacteria	Burkholderiales	Oxalobacteraceae	Oxalobacter	Oxalobacter formigenes HOxBLS	C3016	Crohn's Disease-nonL3	0.0226717
Crohn's Disease	MTG	frc	C3X762	Proteobacteria	Betaproteobacteria	Burkholderiales	Oxalobacteraceae	Oxalobacter	Oxalobacter formigenes HOxBLS	C3016	Crohn's Disease-nonL3	0.232723
Crohn's Disease	MTG	frc	H1RYM1	Proteobacteria	Betaproteobacteria	Burkholderiales	Burkholderiaceae	Cupriavidus	Cupriavidus basilensis OR16	C3016	Crohn's Disease-nonL3	0.0192532
Crohn's Disease	MTG	frc	O06644	Proteobacteria	Betaproteobacteria	Burkholderiales	Oxalobacteraceae	Oxalobacter	Oxalobacter formigenes	C3016	Crohn's Disease-nonL3	0.243626
Crohn's Disease	MTS	frc	A0A377BTA6	Proteobacteria	Gammaproteobacteria	Enterobacterales	Enterobacteriaceae	Escherichia	Escherichia coli	C3016	Crohn's Disease-nonL3	0.218332
Crohn's Disease	MTS	frc	C3X762	Proteobacteria	Betaproteobacteria	Burkholderiales	Oxalobacteraceae	Oxalobacter	Oxalobacter formigenes HOxBLS	C3016	Crohn's Disease-nonL3	1.48329
Crohn's Disease	MTS	frc	H1RYM1	Proteobacteria	Betaproteobacteria	Burkholderiales	Burkholderiaceae	Cupriavidus	Cupriavidus basilensis OR16	C3016	Crohn's Disease-nonL3	0.0265679
Crohn's Disease	MTS	frc	O06644	Proteobacteria	Betaproteobacteria	Burkholderiales	Oxalobacteraceae	Oxalobacter	Oxalobacter formigenes	C3016	Crohn's Disease-nonL3	1.35238
Crohn's Disease	MTG	frc	A0A072MW66	Actinobacteria	Actinobacteria	Bifidobacteriales	Bifidobacteriaceae	Bifidobacterium	Bifidobacterium pseudocatenulatum IPLA36007	C3017	Crohn's Disease	0.0327119
Crohn's Disease	MTG	frc	A0A1B1SBJ2	Bacteroidetes	Bacteroidia	Bacteroidales	Muribaculaceae	Muribaculum	Muribaculum intestinale	C3017	Crohn's Disease	1.31312
Crohn's Disease	MTG	frc	A0A1Q6EIZ9	Bacteroidetes	Bacteroidia	Bacteroidales	NA	NA	Bacteroidales bacterium 52_46	C3017	Crohn's Disease	0.329793
Crohn's Disease	MTG	frc	A0A1Q6EPI6	Actinobacteria	Actinobacteria	Bifidobacteriales	Bifidobacteriaceae	Bifidobacterium	Bifidobacterium sp. 56_9_plus	C3017	Crohn's Disease	0.0324071
Crohn's Disease	MTG	frc	A0A1Q6U8Z5	Proteobacteria	Alphaproteobacteria	Rhodospirillales	Rhodospirillaceae	Azospirillum	Azospirillum sp. 51_20	C3017	Crohn's Disease	1.41321
Crohn's Disease	MTG	frc	A0A2V1IPP0	Bacteroidetes	Bacteroidia	Bacteroidales	Muribaculaceae	NA	Muribaculaceae bacterium DSM 103720	C3017	Crohn's Disease	0.33968
Crohn's Disease	MTG	frc	A0A2V1J0Z5	Bacteroidetes	Bacteroidia	Bacteroidales	Muribaculaceae	NA	Muribaculaceae bacterium DSM 100764	C3017	Crohn's Disease	3.81018
Crohn's Disease	MTG	frc	A0A354HZG4	Bacteroidetes	Bacteroidia	Bacteroidales	Porphyromonadaceae	NA	Porphyromonadaceae bacterium	C3017	Crohn's Disease	2.49632
Crohn's Disease	MTG	frc	A0A355Z7A2	Bacteroidetes	Bacteroidia	Bacteroidales	Porphyromonadaceae	NA	Porphyromonadaceae bacterium	C3017	Crohn's Disease	1.15962
Crohn's Disease	MTG	frc	A1ADQ1	Proteobacteria	Gammaproteobacteria	Enterobacterales	Enterobacteriaceae	Escherichia	Escherichia coli APEC O1	C3017	Crohn's Disease	0.0523788
Crohn's Disease	MTG	frc	G1U9U4	Firmicutes	Bacilli	Lactobacillales	Lactobacillaceae	Lactobacillus	Lactobacillus acidophilus	C3017	Crohn's Disease	0.0719486
Crohn's Disease	MTG	frc	R5AR18	Bacteroidetes	Bacteroidia	Bacteroidales	Prevotellaceae	Prevotella	Prevotella sp. CAG:1031	C3017	Crohn's Disease	0.593479
Crohn's Disease	MTG	frc	R5AXI8	Bacteroidetes	Bacteroidia	Bacteroidales	Bacteroidaceae	Bacteroides	Bacteroides sp. CAG:927	C3017	Crohn's Disease	2.7674
Crohn's Disease	MTG	frc	A0A072MW66	Actinobacteria	Actinobacteria	Bifidobacteriales	Bifidobacteriaceae	Bifidobacterium	Bifidobacterium pseudocatenulatum IPLA36007	C3017	Crohn's Disease-L3	0.0327119
Crohn's Disease	MTG	frc	A0A1B1SBJ2	Bacteroidetes	Bacteroidia	Bacteroidales	Muribaculaceae	Muribaculum	Muribaculum intestinale	C3017	Crohn's Disease-L3	1.31312
Crohn's Disease	MTG	frc	A0A1Q6EIZ9	Bacteroidetes	Bacteroidia	Bacteroidales	NA	NA	Bacteroidales bacterium 52_46	C3017	Crohn's Disease-L3	0.329793
Crohn's Disease	MTG	frc	A0A1Q6EPI6	Actinobacteria	Actinobacteria	Bifidobacteriales	Bifidobacteriaceae	Bifidobacterium	Bifidobacterium sp. 56_9_plus	C3017	Crohn's Disease-L3	0.0324071
Crohn's Disease	MTG	frc	A0A1Q6U8Z5	Proteobacteria	Alphaproteobacteria	Rhodospirillales	Rhodospirillaceae	Azospirillum	Azospirillum sp. 51_20	C3017	Crohn's Disease-L3	1.41321
Crohn's Disease	MTG	frc	A0A2V1IPP0	Bacteroidetes	Bacteroidia	Bacteroidales	Muribaculaceae	NA	Muribaculaceae bacterium DSM 103720	C3017	Crohn's Disease-L3	0.33968
Crohn's Disease	MTG	frc	A0A2V1J0Z5	Bacteroidetes	Bacteroidia	Bacteroidales	Muribaculaceae	NA	Muribaculaceae bacterium DSM 100764	C3017	Crohn's Disease-L3	3.81018
Crohn's Disease	MTG	frc	A0A354HZG4	Bacteroidetes	Bacteroidia	Bacteroidales	Porphyromonadaceae	NA	Porphyromonadaceae bacterium	C3017	Crohn's Disease-L3	2.49632
Crohn's Disease	MTG	frc	A0A355Z7A2	Bacteroidetes	Bacteroidia	Bacteroidales	Porphyromonadaceae	NA	Porphyromonadaceae bacterium	C3017	Crohn's Disease-L3	1.15962
Crohn's Disease	MTG	frc	A1ADQ1	Proteobacteria	Gammaproteobacteria	Enterobacterales	Enterobacteriaceae	Escherichia	Escherichia coli APEC O1	C3017	Crohn's Disease-L3	0.0523788
Crohn's Disease	MTG	frc	G1U9U4	Firmicutes	Bacilli	Lactobacillales	Lactobacillaceae	Lactobacillus	Lactobacillus acidophilus	C3017	Crohn's Disease-L3	0.0719486
Crohn's Disease	MTG	frc	R5AR18	Bacteroidetes	Bacteroidia	Bacteroidales	Prevotellaceae	Prevotella	Prevotella sp. CAG:1031	C3017	Crohn's Disease-L3	0.593479
Crohn's Disease	MTG	frc	R5AXI8	Bacteroidetes	Bacteroidia	Bacteroidales	Bacteroidaceae	Bacteroides	Bacteroides sp. CAG:927	C3017	Crohn's Disease-L3	2.7674
Crohn's Disease	MTG	frc	A0A377BTA6	Proteobacteria	Gammaproteobacteria	Enterobacterales	Enterobacteriaceae	Escherichia	Escherichia coli	C3019	Crohn's Disease	0.287707
Crohn's Disease	MTG	frc	A1ADQ1	Proteobacteria	Gammaproteobacteria	Enterobacterales	Enterobacteriaceae	Escherichia	Escherichia coli APEC O1	C3019	Crohn's Disease	0.355829
Crohn's Disease	MTG	frc	A0A377BTA6	Proteobacteria	Gammaproteobacteria	Enterobacterales	Enterobacteriaceae	Escherichia	Escherichia coli	C3019	Crohn's Disease-L3	0.287707
Crohn's Disease	MTG	frc	A1ADQ1	Proteobacteria	Gammaproteobacteria	Enterobacterales	Enterobacteriaceae	Escherichia	Escherichia coli APEC O1	C3019	Crohn's Disease-L3	0.355829
Crohn's Disease	MTG	frc	A0A016XI66	Proteobacteria	Betaproteobacteria	Burkholderiales	Comamonadaceae	Hylemonella	Hylemonella gracilis str. Niagara R	C3020	Crohn's Disease	0.120696
Crohn's Disease	MTG	frc	A0A1U9T5R4	Proteobacteria	Gammaproteobacteria	Enterobacterales	Enterobacteriaceae	Escherichia	Escherichia coli	C3020	Crohn's Disease	1.89327
Crohn's Disease	MTG	frc	A0A377BTA6	Proteobacteria	Gammaproteobacteria	Enterobacterales	Enterobacteriaceae	Escherichia	Escherichia coli	C3020	Crohn's Disease	6.97093
Crohn's Disease	MTG	frc	A1ADQ1	Proteobacteria	Gammaproteobacteria	Enterobacterales	Enterobacteriaceae	Escherichia	Escherichia coli APEC O1	C3020	Crohn's Disease	27.9715
Crohn's Disease	MTG	frc	B5YYX4	Proteobacteria	Gammaproteobacteria	Enterobacterales	Enterobacteriaceae	Escherichia	Escherichia coli O157:H7 str. EC4115	C3020	Crohn's Disease	0.122146
Crohn's Disease	MTG	frc	W1XEM4	Proteobacteria	Gammaproteobacteria	Enterobacterales	Enterobacteriaceae	Escherichia	Escherichia coli DORA_A_5_14_21	C3020	Crohn's Disease	0.177048
Crohn's Disease	MTG	frc	A0A016XI66	Proteobacteria	Betaproteobacteria	Burkholderiales	Comamonadaceae	Hylemonella	Hylemonella gracilis str. Niagara R	C3020	Crohn's Disease-L3	0.120696
Crohn's Disease	MTG	frc	A0A1U9T5R4	Proteobacteria	Gammaproteobacteria	Enterobacterales	Enterobacteriaceae	Escherichia	Escherichia coli	C3020	Crohn's Disease-L3	1.89327
Crohn's Disease	MTG	frc	A0A377BTA6	Proteobacteria	Gammaproteobacteria	Enterobacterales	Enterobacteriaceae	Escherichia	Escherichia coli	C3020	Crohn's Disease-L3	6.97093
Crohn's Disease	MTG	frc	A1ADQ1	Proteobacteria	Gammaproteobacteria	Enterobacterales	Enterobacteriaceae	Escherichia	Escherichia coli APEC O1	C3020	Crohn's Disease-L3	27.9715
Crohn's Disease	MTG	frc	B5YYX4	Proteobacteria	Gammaproteobacteria	Enterobacterales	Enterobacteriaceae	Escherichia	Escherichia coli O157:H7 str. EC4115	C3020	Crohn's Disease-L3	0.122146
Crohn's Disease	MTG	frc	W1XEM4	Proteobacteria	Gammaproteobacteria	Enterobacterales	Enterobacteriaceae	Escherichia	Escherichia coli DORA_A_5_14_21	C3020	Crohn's Disease-L3	0.177048
Crohn's Disease	MTG	frc	A0A072MW66	Actinobacteria	Actinobacteria	Bifidobacteriales	Bifidobacteriaceae	Bifidobacterium	Bifidobacterium pseudocatenulatum IPLA36007	C3021	Crohn's Disease	0.0396018
Crohn's Disease	MTG	frc	A0A087ADU5	Actinobacteria	Actinobacteria	Bifidobacteriales	Bifidobacteriaceae	Bifidobacterium	Bifidobacterium choerinum	C3021	Crohn's Disease	0.0523787
Crohn's Disease	MTG	frc	A0A174S0X3	Firmicutes	Clostridia	Clostridiales	Clostridiaceae	Clostridium	Clostridium baratii	C3021	Crohn's Disease	0.0396974
Crohn's Disease	MTG	frc	A0A1B1SBJ2	Bacteroidetes	Bacteroidia	Bacteroidales	Muribaculaceae	Muribaculum	Muribaculum intestinale	C3021	Crohn's Disease	0.200881
Crohn's Disease	MTG	frc	A0A1Q6EIZ9	Bacteroidetes	Bacteroidia	Bacteroidales	NA	NA	Bacteroidales bacterium 52_46	C3021	Crohn's Disease	5.48609
Crohn's Disease	MTG	frc	A0A1Q6U8Z5	Proteobacteria	Alphaproteobacteria	Rhodospirillales	Rhodospirillaceae	Azospirillum	Azospirillum sp. 51_20	C3021	Crohn's Disease	0.315236
Crohn's Disease	MTG	frc	A0A377BTA6	Proteobacteria	Gammaproteobacteria	Enterobacterales	Enterobacteriaceae	Escherichia	Escherichia coli	C3021	Crohn's Disease	0.383538
Crohn's Disease	MTG	frc	A1ADQ1	Proteobacteria	Gammaproteobacteria	Enterobacterales	Enterobacteriaceae	Escherichia	Escherichia coli APEC O1	C3021	Crohn's Disease	0.101647
Crohn's Disease	MTG	frc	R5AR18	Bacteroidetes	Bacteroidia	Bacteroidales	Prevotellaceae	Prevotella	Prevotella sp. CAG:1031	C3021	Crohn's Disease	0.0339415
Crohn's Disease	MTG	frc	R5AXI8	Bacteroidetes	Bacteroidia	Bacteroidales	Bacteroidaceae	Bacteroides	Bacteroides sp. CAG:927	C3021	Crohn's Disease	0.0245273
Crohn's Disease	MTS	frc	A0A174S0X3	Firmicutes	Clostridia	Clostridiales	Clostridiaceae	Clostridium	Clostridium baratii	C3021	Crohn's Disease	0.0667892
Crohn's Disease	MTS	frc	A0A1B1SBJ2	Bacteroidetes	Bacteroidia	Bacteroidales	Muribaculaceae	Muribaculum	Muribaculum intestinale	C3021	Crohn's Disease	0.0554558
Crohn's Disease	MTS	frc	A0A1Q6EIZ9	Bacteroidetes	Bacteroidia	Bacteroidales	NA	NA	Bacteroidales bacterium 52_46	C3021	Crohn's Disease	0.946042
Crohn's Disease	MTS	frc	A0A377BTA6	Proteobacteria	Gammaproteobacteria	Enterobacterales	Enterobacteriaceae	Escherichia	Escherichia coli	C3021	Crohn's Disease	0.0602562
Crohn's Disease	MTG	frc	A0A072MW66	Actinobacteria	Actinobacteria	Bifidobacteriales	Bifidobacteriaceae	Bifidobacterium	Bifidobacterium pseudocatenulatum IPLA36007	C3021	Crohn's Disease-nonL3	0.0396018
Crohn's Disease	MTG	frc	A0A087ADU5	Actinobacteria	Actinobacteria	Bifidobacteriales	Bifidobacteriaceae	Bifidobacterium	Bifidobacterium choerinum	C3021	Crohn's Disease-nonL3	0.0523787
Crohn's Disease	MTG	frc	A0A174S0X3	Firmicutes	Clostridia	Clostridiales	Clostridiaceae	Clostridium	Clostridium baratii	C3021	Crohn's Disease-nonL3	0.0396974
Crohn's Disease	MTG	frc	A0A1B1SBJ2	Bacteroidetes	Bacteroidia	Bacteroidales	Muribaculaceae	Muribaculum	Muribaculum intestinale	C3021	Crohn's Disease-nonL3	0.200881
Crohn's Disease	MTG	frc	A0A1Q6EIZ9	Bacteroidetes	Bacteroidia	Bacteroidales	NA	NA	Bacteroidales bacterium 52_46	C3021	Crohn's Disease-nonL3	5.48609
Crohn's Disease	MTG	frc	A0A1Q6U8Z5	Proteobacteria	Alphaproteobacteria	Rhodospirillales	Rhodospirillaceae	Azospirillum	Azospirillum sp. 51_20	C3021	Crohn's Disease-nonL3	0.315236
Crohn's Disease	MTG	frc	A0A377BTA6	Proteobacteria	Gammaproteobacteria	Enterobacterales	Enterobacteriaceae	Escherichia	Escherichia coli	C3021	Crohn's Disease-nonL3	0.383538
Crohn's Disease	MTG	frc	A1ADQ1	Proteobacteria	Gammaproteobacteria	Enterobacterales	Enterobacteriaceae	Escherichia	Escherichia coli APEC O1	C3021	Crohn's Disease-nonL3	0.101647
Crohn's Disease	MTG	frc	R5AR18	Bacteroidetes	Bacteroidia	Bacteroidales	Prevotellaceae	Prevotella	Prevotella sp. CAG:1031	C3021	Crohn's Disease-nonL3	0.0339415
Crohn's Disease	MTG	frc	R5AXI8	Bacteroidetes	Bacteroidia	Bacteroidales	Bacteroidaceae	Bacteroides	Bacteroides sp. CAG:927	C3021	Crohn's Disease-nonL3	0.0245273
Crohn's Disease	MTS	frc	A0A174S0X3	Firmicutes	Clostridia	Clostridiales	Clostridiaceae	Clostridium	Clostridium baratii	C3021	Crohn's Disease-nonL3	0.0667892
Crohn's Disease	MTS	frc	A0A1B1SBJ2	Bacteroidetes	Bacteroidia	Bacteroidales	Muribaculaceae	Muribaculum	Muribaculum intestinale	C3021	Crohn's Disease-nonL3	0.0554558
Crohn's Disease	MTS	frc	A0A1Q6EIZ9	Bacteroidetes	Bacteroidia	Bacteroidales	NA	NA	Bacteroidales bacterium 52_46	C3021	Crohn's Disease-nonL3	0.946042
Crohn's Disease	MTS	frc	A0A377BTA6	Proteobacteria	Gammaproteobacteria	Enterobacterales	Enterobacteriaceae	Escherichia	Escherichia coli	C3021	Crohn's Disease-nonL3	0.0602562
Crohn's Disease	MTG	frc	A0A1F3ZN52	Proteobacteria	Betaproteobacteria	NA	NA	NA	Betaproteobacteria bacterium RIFCSPLOWO2_02_FULL_6	C3023	Crohn's Disease	0.123108
Crohn's Disease	MTG	frc	A0A1Q6EIZ9	Bacteroidetes	Bacteroidia	Bacteroidales	NA	NA	Bacteroidales bacterium 52_46	C3023	Crohn's Disease	0.0672876
Crohn's Disease	MTG	frc	A0A1Q6U8Z5	Proteobacteria	Alphaproteobacteria	Rhodospirillales	Rhodospirillaceae	Azospirillum	Azospirillum sp. 51_20	C3023	Crohn's Disease	0.0616655
Crohn's Disease	MTG	frc	A0A1X3JFJ1	Proteobacteria	Gammaproteobacteria	Enterobacterales	Enterobacteriaceae	Escherichia	Escherichia coli H386	C3023	Crohn's Disease	0.0443617
Crohn's Disease	MTG	frc	A0A209A2M1	Proteobacteria	Gammaproteobacteria	Enterobacterales	Yersiniaceae	Yersinia	Yersinia frederiksenii	C3023	Crohn's Disease	0.0337442
Crohn's Disease	MTG	frc	A0A2V1J0Z5	Bacteroidetes	Bacteroidia	Bacteroidales	Muribaculaceae	NA	Muribaculaceae bacterium DSM 100764	C3023	Crohn's Disease	0.090357
Crohn's Disease	MTG	frc	A0A354HZG4	Bacteroidetes	Bacteroidia	Bacteroidales	Porphyromonadaceae	NA	Porphyromonadaceae bacterium	C3023	Crohn's Disease	0.0301889
Crohn's Disease	MTG	frc	A0A369DPH8	Proteobacteria	Gammaproteobacteria	Enterobacterales	Enterobacteriaceae	Escherichia	Escherichia coli	C3023	Crohn's Disease	0.0430577
Crohn's Disease	MTG	frc	A0A377BTA6	Proteobacteria	Gammaproteobacteria	Enterobacterales	Enterobacteriaceae	Escherichia	Escherichia coli	C3023	Crohn's Disease	0.314968
Crohn's Disease	MTG	frc	A1ADQ1	Proteobacteria	Gammaproteobacteria	Enterobacterales	Enterobacteriaceae	Escherichia	Escherichia coli APEC O1	C3023	Crohn's Disease	0.819041
Crohn's Disease	MTG	frc	B5YYX4	Proteobacteria	Gammaproteobacteria	Enterobacterales	Enterobacteriaceae	Escherichia	Escherichia coli O157:H7 str. EC4115	C3023	Crohn's Disease	0.161619
Crohn's Disease	MTG	frc	C3X762	Proteobacteria	Betaproteobacteria	Burkholderiales	Oxalobacteraceae	Oxalobacter	Oxalobacter formigenes HOxBLS	C3023	Crohn's Disease	0.292722
Crohn's Disease	MTG	frc	H1RYM1	Proteobacteria	Betaproteobacteria	Burkholderiales	Burkholderiaceae	Cupriavidus	Cupriavidus basilensis OR16	C3023	Crohn's Disease	0.0439392
Crohn's Disease	MTG	frc	O06644	Proteobacteria	Betaproteobacteria	Burkholderiales	Oxalobacteraceae	Oxalobacter	Oxalobacter formigenes	C3023	Crohn's Disease	0.161996
Crohn's Disease	MTG	frc	R5AXI8	Bacteroidetes	Bacteroidia	Bacteroidales	Bacteroidaceae	Bacteroides	Bacteroides sp. CAG:927	C3023	Crohn's Disease	0.0374073
Crohn's Disease	MTS	frc	A0A1F3ZN52	Proteobacteria	Betaproteobacteria	NA	NA	NA	Betaproteobacteria bacterium RIFCSPLOWO2_02_FULL_6	C3023	Crohn's Disease	0.0263102
Crohn's Disease	MTS	frc	A0A1Q6EIZ9	Bacteroidetes	Bacteroidia	Bacteroidales	NA	NA	Bacteroidales bacterium 52_46	C3023	Crohn's Disease	0.0257039
Crohn's Disease	MTS	frc	C3X762	Proteobacteria	Betaproteobacteria	Burkholderiales	Oxalobacteraceae	Oxalobacter	Oxalobacter formigenes HOxBLS	C3023	Crohn's Disease	0.663812
Crohn's Disease	MTS	frc	O06644	Proteobacteria	Betaproteobacteria	Burkholderiales	Oxalobacteraceae	Oxalobacter	Oxalobacter formigenes	C3023	Crohn's Disease	0.239895
Crohn's Disease	MTG	frc	A0A1F3ZN52	Proteobacteria	Betaproteobacteria	NA	NA	NA	Betaproteobacteria bacterium RIFCSPLOWO2_02_FULL_6	C3023	Crohn's Disease-L3	0.123108
Crohn's Disease	MTG	frc	A0A1Q6EIZ9	Bacteroidetes	Bacteroidia	Bacteroidales	NA	NA	Bacteroidales bacterium 52_46	C3023	Crohn's Disease-L3	0.0672876
Crohn's Disease	MTG	frc	A0A1Q6U8Z5	Proteobacteria	Alphaproteobacteria	Rhodospirillales	Rhodospirillaceae	Azospirillum	Azospirillum sp. 51_20	C3023	Crohn's Disease-L3	0.0616655
Crohn's Disease	MTG	frc	A0A1X3JFJ1	Proteobacteria	Gammaproteobacteria	Enterobacterales	Enterobacteriaceae	Escherichia	Escherichia coli H386	C3023	Crohn's Disease-L3	0.0443617
Crohn's Disease	MTG	frc	A0A209A2M1	Proteobacteria	Gammaproteobacteria	Enterobacterales	Yersiniaceae	Yersinia	Yersinia frederiksenii	C3023	Crohn's Disease-L3	0.0337442
Crohn's Disease	MTG	frc	A0A2V1J0Z5	Bacteroidetes	Bacteroidia	Bacteroidales	Muribaculaceae	NA	Muribaculaceae bacterium DSM 100764	C3023	Crohn's Disease-L3	0.090357
Crohn's Disease	MTG	frc	A0A354HZG4	Bacteroidetes	Bacteroidia	Bacteroidales	Porphyromonadaceae	NA	Porphyromonadaceae bacterium	C3023	Crohn's Disease-L3	0.0301889
Crohn's Disease	MTG	frc	A0A369DPH8	Proteobacteria	Gammaproteobacteria	Enterobacterales	Enterobacteriaceae	Escherichia	Escherichia coli	C3023	Crohn's Disease-L3	0.0430577
Crohn's Disease	MTG	frc	A0A377BTA6	Proteobacteria	Gammaproteobacteria	Enterobacterales	Enterobacteriaceae	Escherichia	Escherichia coli	C3023	Crohn's Disease-L3	0.314968
Crohn's Disease	MTG	frc	A1ADQ1	Proteobacteria	Gammaproteobacteria	Enterobacterales	Enterobacteriaceae	Escherichia	Escherichia coli APEC O1	C3023	Crohn's Disease-L3	0.819041
Crohn's Disease	MTG	frc	B5YYX4	Proteobacteria	Gammaproteobacteria	Enterobacterales	Enterobacteriaceae	Escherichia	Escherichia coli O157:H7 str. EC4115	C3023	Crohn's Disease-L3	0.161619
Crohn's Disease	MTG	frc	C3X762	Proteobacteria	Betaproteobacteria	Burkholderiales	Oxalobacteraceae	Oxalobacter	Oxalobacter formigenes HOxBLS	C3023	Crohn's Disease-L3	0.292722
Crohn's Disease	MTG	frc	H1RYM1	Proteobacteria	Betaproteobacteria	Burkholderiales	Burkholderiaceae	Cupriavidus	Cupriavidus basilensis OR16	C3023	Crohn's Disease-L3	0.0439392
Crohn's Disease	MTG	frc	O06644	Proteobacteria	Betaproteobacteria	Burkholderiales	Oxalobacteraceae	Oxalobacter	Oxalobacter formigenes	C3023	Crohn's Disease-L3	0.161996
Crohn's Disease	MTG	frc	R5AXI8	Bacteroidetes	Bacteroidia	Bacteroidales	Bacteroidaceae	Bacteroides	Bacteroides sp. CAG:927	C3023	Crohn's Disease-L3	0.0374073
Crohn's Disease	MTS	frc	A0A1F3ZN52	Proteobacteria	Betaproteobacteria	NA	NA	NA	Betaproteobacteria bacterium RIFCSPLOWO2_02_FULL_6	C3023	Crohn's Disease-L3	0.0263102
Crohn's Disease	MTS	frc	A0A1Q6EIZ9	Bacteroidetes	Bacteroidia	Bacteroidales	NA	NA	Bacteroidales bacterium 52_46	C3023	Crohn's Disease-L3	0.0257039
Crohn's Disease	MTS	frc	C3X762	Proteobacteria	Betaproteobacteria	Burkholderiales	Oxalobacteraceae	Oxalobacter	Oxalobacter formigenes HOxBLS	C3023	Crohn's Disease-L3	0.663812
Crohn's Disease	MTS	frc	O06644	Proteobacteria	Betaproteobacteria	Burkholderiales	Oxalobacteraceae	Oxalobacter	Oxalobacter formigenes	C3023	Crohn's Disease-L3	0.239895
Crohn's Disease	MTG	frc	A0A072MW66	Actinobacteria	Actinobacteria	Bifidobacteriales	Bifidobacteriaceae	Bifidobacterium	Bifidobacterium pseudocatenulatum IPLA36007	C3027	Crohn's Disease	0.0539237
Crohn's Disease	MTG	frc	A0A087ADU5	Actinobacteria	Actinobacteria	Bifidobacteriales	Bifidobacteriaceae	Bifidobacterium	Bifidobacterium choerinum	C3027	Crohn's Disease	0.0538978
Crohn's Disease	MTG	frc	A0A087B567	Actinobacteria	Actinobacteria	Bifidobacteriales	Bifidobacteriaceae	Bifidobacterium	Bifidobacterium cuniculi	C3027	Crohn's Disease	0.0241402
Crohn's Disease	MTG	frc	A0A0A7I974	Actinobacteria	Actinobacteria	Bifidobacteriales	Bifidobacteriaceae	Bifidobacterium	Bifidobacterium pseudolongum PV8-2	C3027	Crohn's Disease	0.0269489
Crohn's Disease	MTG	frc	A0A1V8Q5N2	Actinobacteria	Actinobacteria	Bifidobacteriales	Bifidobacteriaceae	Bifidobacterium	Bifidobacterium dentium	C3027	Crohn's Disease	0.1054
Crohn's Disease	MTG	frc	A0A377BTA6	Proteobacteria	Gammaproteobacteria	Enterobacterales	Enterobacteriaceae	Escherichia	Escherichia coli	C3027	Crohn's Disease	0.0491861
Crohn's Disease	MTG	frc	A1ADQ1	Proteobacteria	Gammaproteobacteria	Enterobacterales	Enterobacteriaceae	Escherichia	Escherichia coli APEC O1	C3027	Crohn's Disease	0.0614007
Crohn's Disease	MTS	frc	A0A377BTA6	Proteobacteria	Gammaproteobacteria	Enterobacterales	Enterobacteriaceae	Escherichia	Escherichia coli	C3027	Crohn's Disease	0.0638099
Crohn's Disease	MTG	frc	A0A072MW66	Actinobacteria	Actinobacteria	Bifidobacteriales	Bifidobacteriaceae	Bifidobacterium	Bifidobacterium pseudocatenulatum IPLA36007	C3027	Crohn's Disease-nonL3	0.0539237
Crohn's Disease	MTG	frc	A0A087ADU5	Actinobacteria	Actinobacteria	Bifidobacteriales	Bifidobacteriaceae	Bifidobacterium	Bifidobacterium choerinum	C3027	Crohn's Disease-nonL3	0.0538978
Crohn's Disease	MTG	frc	A0A087B567	Actinobacteria	Actinobacteria	Bifidobacteriales	Bifidobacteriaceae	Bifidobacterium	Bifidobacterium cuniculi	C3027	Crohn's Disease-nonL3	0.0241402
Crohn's Disease	MTG	frc	A0A0A7I974	Actinobacteria	Actinobacteria	Bifidobacteriales	Bifidobacteriaceae	Bifidobacterium	Bifidobacterium pseudolongum PV8-2	C3027	Crohn's Disease-nonL3	0.0269489
Crohn's Disease	MTG	frc	A0A1V8Q5N2	Actinobacteria	Actinobacteria	Bifidobacteriales	Bifidobacteriaceae	Bifidobacterium	Bifidobacterium dentium	C3027	Crohn's Disease-nonL3	0.1054
Crohn's Disease	MTG	frc	A0A377BTA6	Proteobacteria	Gammaproteobacteria	Enterobacterales	Enterobacteriaceae	Escherichia	Escherichia coli	C3027	Crohn's Disease-nonL3	0.0491861
Crohn's Disease	MTG	frc	A1ADQ1	Proteobacteria	Gammaproteobacteria	Enterobacterales	Enterobacteriaceae	Escherichia	Escherichia coli APEC O1	C3027	Crohn's Disease-nonL3	0.0614007
Crohn's Disease	MTS	frc	A0A377BTA6	Proteobacteria	Gammaproteobacteria	Enterobacterales	Enterobacteriaceae	Escherichia	Escherichia coli	C3027	Crohn's Disease-nonL3	0.0638099
Crohn's Disease	MTG	frc	A0A1Q6EIZ9	Bacteroidetes	Bacteroidia	Bacteroidales	NA	NA	Bacteroidales bacterium 52_46	C3028	Crohn's Disease	0.0612656
Crohn's Disease	MTG	frc	A0A2X5G0L0	Proteobacteria	Gammaproteobacteria	Enterobacterales	Enterobacteriaceae	Escherichia	Escherichia coli	C3028	Crohn's Disease	0.0506264
Crohn's Disease	MTG	frc	A0A377BTA6	Proteobacteria	Gammaproteobacteria	Enterobacterales	Enterobacteriaceae	Escherichia	Escherichia coli	C3028	Crohn's Disease	0.766614
Crohn's Disease	MTG	frc	A1ADQ1	Proteobacteria	Gammaproteobacteria	Enterobacterales	Enterobacteriaceae	Escherichia	Escherichia coli APEC O1	C3028	Crohn's Disease	1.35571
Crohn's Disease	MTS	frc	A0A377BTA6	Proteobacteria	Gammaproteobacteria	Enterobacterales	Enterobacteriaceae	Escherichia	Escherichia coli	C3028	Crohn's Disease	0.105532
Crohn's Disease	MTG	frc	A0A1Q6EIZ9	Bacteroidetes	Bacteroidia	Bacteroidales	NA	NA	Bacteroidales bacterium 52_46	C3028	Crohn's Disease-nonL3	0.0612656
Crohn's Disease	MTG	frc	A0A2X5G0L0	Proteobacteria	Gammaproteobacteria	Enterobacterales	Enterobacteriaceae	Escherichia	Escherichia coli	C3028	Crohn's Disease-nonL3	0.0506264
Crohn's Disease	MTG	frc	A0A377BTA6	Proteobacteria	Gammaproteobacteria	Enterobacterales	Enterobacteriaceae	Escherichia	Escherichia coli	C3028	Crohn's Disease-nonL3	0.766614
Crohn's Disease	MTG	frc	A1ADQ1	Proteobacteria	Gammaproteobacteria	Enterobacterales	Enterobacteriaceae	Escherichia	Escherichia coli APEC O1	C3028	Crohn's Disease-nonL3	1.35571
Crohn's Disease	MTS	frc	A0A377BTA6	Proteobacteria	Gammaproteobacteria	Enterobacterales	Enterobacteriaceae	Escherichia	Escherichia coli	C3028	Crohn's Disease-nonL3	0.105532
Crohn's Disease	MTG	frc	A0A016XI66	Proteobacteria	Betaproteobacteria	Burkholderiales	Comamonadaceae	Hylemonella	Hylemonella gracilis str. Niagara R	C3030	Crohn's Disease	0.0223419
Crohn's Disease	MTG	frc	A0A024KXD2	Proteobacteria	Gammaproteobacteria	Enterobacterales	Enterobacteriaceae	Escherichia	Escherichia coli D6-113.11	C3030	Crohn's Disease	0.0465306
Crohn's Disease	MTG	frc	A0A070SKW5	Proteobacteria	Gammaproteobacteria	Enterobacterales	Enterobacteriaceae	Escherichia	Escherichia coli 2-210-07_S3_C3	C3030	Crohn's Disease	0.104228
Crohn's Disease	MTG	frc	A0A209A2M1	Proteobacteria	Gammaproteobacteria	Enterobacterales	Yersiniaceae	Yersinia	Yersinia frederiksenii	C3030	Crohn's Disease	0.0433874
Crohn's Disease	MTG	frc	A0A2X5G0L0	Proteobacteria	Gammaproteobacteria	Enterobacterales	Enterobacteriaceae	Escherichia	Escherichia coli	C3030	Crohn's Disease	0.203755
Crohn's Disease	MTG	frc	A0A377BTA6	Proteobacteria	Gammaproteobacteria	Enterobacterales	Enterobacteriaceae	Escherichia	Escherichia coli	C3030	Crohn's Disease	10.1119
Crohn's Disease	MTG	frc	A1ADQ1	Proteobacteria	Gammaproteobacteria	Enterobacterales	Enterobacteriaceae	Escherichia	Escherichia coli APEC O1	C3030	Crohn's Disease	5.6044
Crohn's Disease	MTG	frc	B5YYX4	Proteobacteria	Gammaproteobacteria	Enterobacterales	Enterobacteriaceae	Escherichia	Escherichia coli O157:H7 str. EC4115	C3030	Crohn's Disease	0.484777
Crohn's Disease	MTG	frc	Q8FFE8	Proteobacteria	Gammaproteobacteria	Enterobacterales	Enterobacteriaceae	Escherichia	Escherichia coli CFT073	C3030	Crohn's Disease	0.0373356
Crohn's Disease	MTS	frc	A0A377BTA6	Proteobacteria	Gammaproteobacteria	Enterobacterales	Enterobacteriaceae	Escherichia	Escherichia coli	C3030	Crohn's Disease	1.02909
Crohn's Disease	MTS	frc	A1ADQ1	Proteobacteria	Gammaproteobacteria	Enterobacterales	Enterobacteriaceae	Escherichia	Escherichia coli APEC O1	C3030	Crohn's Disease	0.0431803
Crohn's Disease	MTS	frc	Q8FFE8	Proteobacteria	Gammaproteobacteria	Enterobacterales	Enterobacteriaceae	Escherichia	Escherichia coli CFT073	C3030	Crohn's Disease	0.0742655
Crohn's Disease	MTG	frc	A0A016XI66	Proteobacteria	Betaproteobacteria	Burkholderiales	Comamonadaceae	Hylemonella	Hylemonella gracilis str. Niagara R	C3030	Crohn's Disease-nonL3	0.0223419
Crohn's Disease	MTG	frc	A0A024KXD2	Proteobacteria	Gammaproteobacteria	Enterobacterales	Enterobacteriaceae	Escherichia	Escherichia coli D6-113.11	C3030	Crohn's Disease-nonL3	0.0465306
Crohn's Disease	MTG	frc	A0A070SKW5	Proteobacteria	Gammaproteobacteria	Enterobacterales	Enterobacteriaceae	Escherichia	Escherichia coli 2-210-07_S3_C3	C3030	Crohn's Disease-nonL3	0.104228
Crohn's Disease	MTG	frc	A0A209A2M1	Proteobacteria	Gammaproteobacteria	Enterobacterales	Yersiniaceae	Yersinia	Yersinia frederiksenii	C3030	Crohn's Disease-nonL3	0.0433874
Crohn's Disease	MTG	frc	A0A2X5G0L0	Proteobacteria	Gammaproteobacteria	Enterobacterales	Enterobacteriaceae	Escherichia	Escherichia coli	C3030	Crohn's Disease-nonL3	0.203755
Crohn's Disease	MTG	frc	A0A377BTA6	Proteobacteria	Gammaproteobacteria	Enterobacterales	Enterobacteriaceae	Escherichia	Escherichia coli	C3030	Crohn's Disease-nonL3	10.1119
Crohn's Disease	MTG	frc	A1ADQ1	Proteobacteria	Gammaproteobacteria	Enterobacterales	Enterobacteriaceae	Escherichia	Escherichia coli APEC O1	C3030	Crohn's Disease-nonL3	5.6044
Crohn's Disease	MTG	frc	B5YYX4	Proteobacteria	Gammaproteobacteria	Enterobacterales	Enterobacteriaceae	Escherichia	Escherichia coli O157:H7 str. EC4115	C3030	Crohn's Disease-nonL3	0.484777
Crohn's Disease	MTG	frc	Q8FFE8	Proteobacteria	Gammaproteobacteria	Enterobacterales	Enterobacteriaceae	Escherichia	Escherichia coli CFT073	C3030	Crohn's Disease-nonL3	0.0373356
Crohn's Disease	MTS	frc	A0A377BTA6	Proteobacteria	Gammaproteobacteria	Enterobacterales	Enterobacteriaceae	Escherichia	Escherichia coli	C3030	Crohn's Disease-nonL3	1.02909
Crohn's Disease	MTS	frc	A1ADQ1	Proteobacteria	Gammaproteobacteria	Enterobacterales	Enterobacteriaceae	Escherichia	Escherichia coli APEC O1	C3030	Crohn's Disease-nonL3	0.0431803
Crohn's Disease	MTS	frc	Q8FFE8	Proteobacteria	Gammaproteobacteria	Enterobacterales	Enterobacteriaceae	Escherichia	Escherichia coli CFT073	C3030	Crohn's Disease-nonL3	0.0742655
Crohn's Disease	MTG	frc	A0A174S0X3	Firmicutes	Clostridia	Clostridiales	Clostridiaceae	Clostridium	Clostridium baratii	C3031	Crohn's Disease	0.0367207
Crohn's Disease	MTG	frc	A0A1Q6EIZ9	Bacteroidetes	Bacteroidia	Bacteroidales	NA	NA	Bacteroidales bacterium 52_46	C3031	Crohn's Disease	0.10737
Crohn's Disease	MTG	frc	A0A377BTA6	Proteobacteria	Gammaproteobacteria	Enterobacterales	Enterobacteriaceae	Escherichia	Escherichia coli	C3031	Crohn's Disease	0.510554
Crohn's Disease	MTG	frc	C3X2D4	Proteobacteria	Betaproteobacteria	Burkholderiales	Oxalobacteraceae	Oxalobacter	Oxalobacter formigenes HOxBLS	C3031	Crohn's Disease	0.0362109
Crohn's Disease	MTG	frc	A0A174S0X3	Firmicutes	Clostridia	Clostridiales	Clostridiaceae	Clostridium	Clostridium baratii	C3031	Crohn's Disease-nonL3	0.0367207
Crohn's Disease	MTG	frc	A0A1Q6EIZ9	Bacteroidetes	Bacteroidia	Bacteroidales	NA	NA	Bacteroidales bacterium 52_46	C3031	Crohn's Disease-nonL3	0.10737
Crohn's Disease	MTG	frc	A0A377BTA6	Proteobacteria	Gammaproteobacteria	Enterobacterales	Enterobacteriaceae	Escherichia	Escherichia coli	C3031	Crohn's Disease-nonL3	0.510554
Crohn's Disease	MTG	frc	C3X2D4	Proteobacteria	Betaproteobacteria	Burkholderiales	Oxalobacteraceae	Oxalobacter	Oxalobacter formigenes HOxBLS	C3031	Crohn's Disease-nonL3	0.0362109
Crohn's Disease	MTG	frc	A0A070SKW5	Proteobacteria	Gammaproteobacteria	Enterobacterales	Enterobacteriaceae	Escherichia	Escherichia coli 2-210-07_S3_C3	C3033	Crohn's Disease	1.18893
Crohn's Disease	MTG	frc	A0A163DH69	Proteobacteria	Gammaproteobacteria	Enterobacterales	Enterobacteriaceae	Escherichia	Escherichia coli	C3033	Crohn's Disease	0.08618
Crohn's Disease	MTG	frc	A0A377BTA6	Proteobacteria	Gammaproteobacteria	Enterobacterales	Enterobacteriaceae	Escherichia	Escherichia coli	C3033	Crohn's Disease	22.9251
Crohn's Disease	MTG	frc	A1ADQ1	Proteobacteria	Gammaproteobacteria	Enterobacterales	Enterobacteriaceae	Escherichia	Escherichia coli APEC O1	C3033	Crohn's Disease	9.13508
Crohn's Disease	MTG	frc	A0A070SKW5	Proteobacteria	Gammaproteobacteria	Enterobacterales	Enterobacteriaceae	Escherichia	Escherichia coli 2-210-07_S3_C3	C3033	Crohn's Disease-nonL3	1.18893
Crohn's Disease	MTG	frc	A0A163DH69	Proteobacteria	Gammaproteobacteria	Enterobacterales	Enterobacteriaceae	Escherichia	Escherichia coli	C3033	Crohn's Disease-nonL3	0.08618
Crohn's Disease	MTG	frc	A0A377BTA6	Proteobacteria	Gammaproteobacteria	Enterobacterales	Enterobacteriaceae	Escherichia	Escherichia coli	C3033	Crohn's Disease-nonL3	22.9251
Crohn's Disease	MTG	frc	A1ADQ1	Proteobacteria	Gammaproteobacteria	Enterobacterales	Enterobacteriaceae	Escherichia	Escherichia coli APEC O1	C3033	Crohn's Disease-nonL3	9.13508
Crohn's Disease	MTG	frc	A0A062XDE4	Firmicutes	Bacilli	Lactobacillales	Lactobacillaceae	Lactobacillus	Lactobacillus animalis	C3035	Crohn's Disease	0.123712
Crohn's Disease	MTG	frc	A0A087QB11	Firmicutes	Bacilli	Lactobacillales	Lactobacillaceae	Lactobacillus	Lactobacillus gasseri SV-16A-US	C3035	Crohn's Disease	0.453612
Crohn's Disease	MTG	frc	A0A1V3Y246	Firmicutes	Bacilli	Lactobacillales	Lactobacillaceae	Lactobacillus	Lactobacillus gasseri	C3035	Crohn's Disease	0.0824749
Crohn's Disease	MTG	frc	A0A377BTA6	Proteobacteria	Gammaproteobacteria	Enterobacterales	Enterobacteriaceae	Escherichia	Escherichia coli	C3035	Crohn's Disease	1.42995
Crohn's Disease	MTG	frc	A1ADQ1	Proteobacteria	Gammaproteobacteria	Enterobacterales	Enterobacteriaceae	Escherichia	Escherichia coli APEC O1	C3035	Crohn's Disease	0.11799
Crohn's Disease	MTG	frc	R5AXI8	Bacteroidetes	Bacteroidia	Bacteroidales	Bacteroidaceae	Bacteroides	Bacteroides sp. CAG:927	C3035	Crohn's Disease	0.0636143
Crohn's Disease	MTS	frc	A0A377BTA6	Proteobacteria	Gammaproteobacteria	Enterobacterales	Enterobacteriaceae	Escherichia	Escherichia coli	C3035	Crohn's Disease	0.166466
Crohn's Disease	MTG	frc	A0A062XDE4	Firmicutes	Bacilli	Lactobacillales	Lactobacillaceae	Lactobacillus	Lactobacillus animalis	C3035	Crohn's Disease-L3	0.123712
Crohn's Disease	MTG	frc	A0A087QB11	Firmicutes	Bacilli	Lactobacillales	Lactobacillaceae	Lactobacillus	Lactobacillus gasseri SV-16A-US	C3035	Crohn's Disease-L3	0.453612
Crohn's Disease	MTG	frc	A0A1V3Y246	Firmicutes	Bacilli	Lactobacillales	Lactobacillaceae	Lactobacillus	Lactobacillus gasseri	C3035	Crohn's Disease-L3	0.0824749
Crohn's Disease	MTG	frc	A0A377BTA6	Proteobacteria	Gammaproteobacteria	Enterobacterales	Enterobacteriaceae	Escherichia	Escherichia coli	C3035	Crohn's Disease-L3	1.42995
Crohn's Disease	MTG	frc	A1ADQ1	Proteobacteria	Gammaproteobacteria	Enterobacterales	Enterobacteriaceae	Escherichia	Escherichia coli APEC O1	C3035	Crohn's Disease-L3	0.11799
Crohn's Disease	MTG	frc	R5AXI8	Bacteroidetes	Bacteroidia	Bacteroidales	Bacteroidaceae	Bacteroides	Bacteroides sp. CAG:927	C3035	Crohn's Disease-L3	0.0636143
Crohn's Disease	MTS	frc	A0A377BTA6	Proteobacteria	Gammaproteobacteria	Enterobacterales	Enterobacteriaceae	Escherichia	Escherichia coli	C3035	Crohn's Disease-L3	0.166466
Crohn's Disease	MTG	frc	A0A377BTA6	Proteobacteria	Gammaproteobacteria	Enterobacterales	Enterobacteriaceae	Escherichia	Escherichia coli	C4006	Crohn's Disease	1.72894
Crohn's Disease	MTG	frc	A1ADQ1	Proteobacteria	Gammaproteobacteria	Enterobacterales	Enterobacteriaceae	Escherichia	Escherichia coli APEC O1	C4006	Crohn's Disease	2.854
Crohn's Disease	MTG	frc	A0A0L7BLA3	Actinobacteria	Actinobacteria	Bifidobacteriales	Bifidobacteriaceae	Bifidobacterium	Bifidobacterium animalis subsp. animalis MCC 0483	C4015	Crohn's Disease	0.0226376
Crohn's Disease	MTG	frc	A0A248X7K1	Actinobacteria	Actinobacteria	Bifidobacteriales	Bifidobacteriaceae	Bifidobacterium	Bifidobacterium pseudolongum	C4015	Crohn's Disease	0.0225866
Crohn's Disease	MTG	frc	A0A377BTA6	Proteobacteria	Gammaproteobacteria	Enterobacterales	Enterobacteriaceae	Escherichia	Escherichia coli	C4015	Crohn's Disease	0.250143
Crohn's Disease	MTG	frc	A1ADQ1	Proteobacteria	Gammaproteobacteria	Enterobacterales	Enterobacteriaceae	Escherichia	Escherichia coli APEC O1	C4015	Crohn's Disease	0.482138
Crohn's Disease	MTG	frc	Q8FFE8	Proteobacteria	Gammaproteobacteria	Enterobacterales	Enterobacteriaceae	Escherichia	Escherichia coli CFT073	C4015	Crohn's Disease	0.0241069
Crohn's Disease	MTG	frc	A0A377BTA6	Proteobacteria	Gammaproteobacteria	Enterobacterales	Enterobacteriaceae	Escherichia	Escherichia coli	C4020	Crohn's Disease	0.0391451
Crohn's Disease	MTG	frc	A0A016XI66	Proteobacteria	Betaproteobacteria	Burkholderiales	Comamonadaceae	Hylemonella	Hylemonella gracilis str. Niagara R	C4028	Crohn's Disease	0.0252364
Crohn's Disease	MTG	frc	A1ADQ1	Proteobacteria	Gammaproteobacteria	Enterobacterales	Enterobacteriaceae	Escherichia	Escherichia coli APEC O1	C4028	Crohn's Disease	0.715113
Crohn's Disease	MTG	frc	B7MY33	Proteobacteria	Gammaproteobacteria	Enterobacterales	Enterobacteriaceae	Escherichia	Escherichia coli ED1a	C4028	Crohn's Disease	0.102159
Crohn's Disease	MTG	frc	C3X762	Proteobacteria	Betaproteobacteria	Burkholderiales	Oxalobacteraceae	Oxalobacter	Oxalobacter formigenes HOxBLS	C4028	Crohn's Disease	0.0501157
Crohn's Disease	MTG	frc	O06644	Proteobacteria	Betaproteobacteria	Burkholderiales	Oxalobacteraceae	Oxalobacter	Oxalobacter formigenes	C4028	Crohn's Disease	0.074471
Crohn's Disease	MTG	frc	A0A072MW66	Actinobacteria	Actinobacteria	Bifidobacteriales	Bifidobacteriaceae	Bifidobacterium	Bifidobacterium pseudocatenulatum IPLA36007	C4030	Crohn's Disease	1.44917
Crohn's Disease	MTG	frc	A0A1Q6EPI6	Actinobacteria	Actinobacteria	Bifidobacteriales	Bifidobacteriaceae	Bifidobacterium	Bifidobacterium sp. 56_9_plus	C4030	Crohn's Disease	0.066101
Crohn's Disease	MTG	frc	A0A377BTA6	Proteobacteria	Gammaproteobacteria	Enterobacterales	Enterobacteriaceae	Escherichia	Escherichia coli	C4030	Crohn's Disease	0.0675999
Crohn's Disease	MTG	frc	A0A377BTA6	Proteobacteria	Gammaproteobacteria	Enterobacterales	Enterobacteriaceae	Escherichia	Escherichia coli	C5001	Crohn's Disease	0.109716
Crohn's Disease	MTG	frc	A1ADQ1	Proteobacteria	Gammaproteobacteria	Enterobacterales	Enterobacteriaceae	Escherichia	Escherichia coli APEC O1	C5001	Crohn's Disease	0.34893
Crohn's Disease	MTG	frc	A0A087QB11	Firmicutes	Bacilli	Lactobacillales	Lactobacillaceae	Lactobacillus	Lactobacillus gasseri SV-16A-US	C5009	Crohn's Disease	0.121412
Crohn's Disease	MTG	frc	A0A072MW66	Actinobacteria	Actinobacteria	Bifidobacteriales	Bifidobacteriaceae	Bifidobacterium	Bifidobacterium pseudocatenulatum IPLA36007	C5019	Crohn's Disease	0.462322
Crohn's Disease	MTG	frc	A0A174BHB6	Actinobacteria	Actinobacteria	Bifidobacteriales	Bifidobacteriaceae	Bifidobacterium	Bifidobacterium pseudocatenulatum	C5019	Crohn's Disease	0.0355632
Crohn's Disease	MTG	frc	A0A1Q6EPI6	Actinobacteria	Actinobacteria	Bifidobacteriales	Bifidobacteriaceae	Bifidobacterium	Bifidobacterium sp. 56_9_plus	C5019	Crohn's Disease	0.0369038
Crohn's Disease	MTG	frc	A0A2V1J0Z5	Bacteroidetes	Bacteroidia	Bacteroidales	Muribaculaceae	NA	Muribaculaceae bacterium DSM 100764	C5019	Crohn's Disease	0.192634
Crohn's Disease	MTG	frc	A0A354HZG4	Bacteroidetes	Bacteroidia	Bacteroidales	Porphyromonadaceae	NA	Porphyromonadaceae bacterium	C5019	Crohn's Disease	0.0386162
Crohn's Disease	MTG	frc	A0A377BTA6	Proteobacteria	Gammaproteobacteria	Enterobacterales	Enterobacteriaceae	Escherichia	Escherichia coli	C5023	Crohn's Disease	2.20162
Crohn's Disease	MTG	frc	A1ADQ1	Proteobacteria	Gammaproteobacteria	Enterobacterales	Enterobacteriaceae	Escherichia	Escherichia coli APEC O1	C5023	Crohn's Disease	5.69477
Crohn's Disease	MTG	frc	A0A072MW66	Actinobacteria	Actinobacteria	Bifidobacteriales	Bifidobacteriaceae	Bifidobacterium	Bifidobacterium pseudocatenulatum IPLA36007	C6009	Crohn's Disease	1.56325
Crohn's Disease	MTG	frc	A0A174BHB6	Actinobacteria	Actinobacteria	Bifidobacteriales	Bifidobacteriaceae	Bifidobacterium	Bifidobacterium pseudocatenulatum	C6009	Crohn's Disease	0.0976641
Crohn's Disease	MTG	frc	A0A1Q6EPI6	Actinobacteria	Actinobacteria	Bifidobacteriales	Bifidobacteriaceae	Bifidobacterium	Bifidobacterium sp. 56_9_plus	C6009	Crohn's Disease	0.607896
Crohn's Disease	MTG	frc	A0A377BTA6	Proteobacteria	Gammaproteobacteria	Enterobacterales	Enterobacteriaceae	Escherichia	Escherichia coli	C6009	Crohn's Disease	0.0852345
Crohn's Disease	MTG	frc	A1ADQ1	Proteobacteria	Gammaproteobacteria	Enterobacterales	Enterobacteriaceae	Escherichia	Escherichia coli APEC O1	C6009	Crohn's Disease	0.189415
Crohn's Disease	MTG	frc	A0A377BTA6	Proteobacteria	Gammaproteobacteria	Enterobacterales	Enterobacteriaceae	Escherichia	Escherichia coli	C6010	Crohn's Disease	0.0728582
Crohn's Disease	MTG	frc	A1ADQ1	Proteobacteria	Gammaproteobacteria	Enterobacterales	Enterobacteriaceae	Escherichia	Escherichia coli APEC O1	C6010	Crohn's Disease	0.0386183
Crohn's Disease	MTG	frc	A0A072MW66	Actinobacteria	Actinobacteria	Bifidobacteriales	Bifidobacteriaceae	Bifidobacterium	Bifidobacterium pseudocatenulatum IPLA36007	C6028	Crohn's Disease	0.697436
Crohn's Disease	MTG	frc	A0A174BHB6	Actinobacteria	Actinobacteria	Bifidobacteriales	Bifidobacteriaceae	Bifidobacterium	Bifidobacterium pseudocatenulatum	C6028	Crohn's Disease	0.153283
Crohn's Disease	MTG	frc	A0A1Q6EPI6	Actinobacteria	Actinobacteria	Bifidobacteriales	Bifidobacteriaceae	Bifidobacterium	Bifidobacterium sp. 56_9_plus	C6028	Crohn's Disease	0.127248
Crohn's Disease	MTG	frc	A0A2V1J0Z5	Bacteroidetes	Bacteroidia	Bacteroidales	Muribaculaceae	NA	Muribaculaceae bacterium DSM 100764	C6028	Crohn's Disease	0.0996337
Crohn's Disease	MTG	frc	A0A354HZG4	Bacteroidetes	Bacteroidia	Bacteroidales	Porphyromonadaceae	NA	Porphyromonadaceae bacterium	C6028	Crohn's Disease	0.0665765
Crohn's Disease	MTG	frc	A0A355Z7A2	Bacteroidetes	Bacteroidia	Bacteroidales	Porphyromonadaceae	NA	Porphyromonadaceae bacterium	C6028	Crohn's Disease	0.0332112
Crohn's Disease	MTG	frc	A0A377BTA6	Proteobacteria	Gammaproteobacteria	Enterobacterales	Enterobacteriaceae	Escherichia	Escherichia coli	C6028	Crohn's Disease	8.62136
Crohn's Disease	MTG	frc	A1ADQ1	Proteobacteria	Gammaproteobacteria	Enterobacterales	Enterobacteriaceae	Escherichia	Escherichia coli APEC O1	C6028	Crohn's Disease	21.3484
Crohn's Disease	MTG	frc	R5AR18	Bacteroidetes	Bacteroidia	Bacteroidales	Prevotellaceae	Prevotella	Prevotella sp. CAG:1031	C6028	Crohn's Disease	0.131626
Crohn's Disease	MTG	frc	R5AXI8	Bacteroidetes	Bacteroidia	Bacteroidales	Bacteroidaceae	Bacteroides	Bacteroides sp. CAG:927	C6028	Crohn's Disease	0.0332883
Crohn's Disease	MTG	frc	A0A072MW66	Actinobacteria	Actinobacteria	Bifidobacteriales	Bifidobacteriaceae	Bifidobacterium	Bifidobacterium pseudocatenulatum IPLA36007	E5001	Crohn's Disease	0.09141
Crohn's Disease	MTG	frc	A0A0R1HAW1	Firmicutes	Bacilli	Lactobacillales	Lactobacillaceae	Lactobacillus	Lactobacillus amylovorus DSM 20531	E5001	Crohn's Disease	0.0417632
Crohn's Disease	MTG	frc	A0A174BHB6	Actinobacteria	Actinobacteria	Bifidobacteriales	Bifidobacteriaceae	Bifidobacterium	Bifidobacterium pseudocatenulatum	E5001	Crohn's Disease	0.0198108
Crohn's Disease	MTG	frc	A0A1Q6EPI6	Actinobacteria	Actinobacteria	Bifidobacteriales	Bifidobacteriaceae	Bifidobacterium	Bifidobacterium sp. 56_9_plus	E5001	Crohn's Disease	0.0274857
Crohn's Disease	MTG	frc	A0A1V8Q5N2	Actinobacteria	Actinobacteria	Bifidobacteriales	Bifidobacteriaceae	Bifidobacterium	Bifidobacterium dentium	E5001	Crohn's Disease	0.0693687
Crohn's Disease	MTG	frc	A0A377BTA6	Proteobacteria	Gammaproteobacteria	Enterobacterales	Enterobacteriaceae	Escherichia	Escherichia coli	E5001	Crohn's Disease	0.33606
Crohn's Disease	MTG	frc	A1ADQ1	Proteobacteria	Gammaproteobacteria	Enterobacterales	Enterobacteriaceae	Escherichia	Escherichia coli APEC O1	E5001	Crohn's Disease	0.267534
Crohn's Disease	MTG	frc	G1U9U4	Firmicutes	Bacilli	Lactobacillales	Lactobacillaceae	Lactobacillus	Lactobacillus acidophilus	E5001	Crohn's Disease	0.0833387
Crohn's Disease	MTS	frc	A0A377BTA6	Proteobacteria	Gammaproteobacteria	Enterobacterales	Enterobacteriaceae	Escherichia	Escherichia coli	E5001	Crohn's Disease	0.0331767
Crohn's Disease	MTG	frc	A0A072MW66	Actinobacteria	Actinobacteria	Bifidobacteriales	Bifidobacteriaceae	Bifidobacterium	Bifidobacterium pseudocatenulatum IPLA36007	E5001	Crohn's Disease-L3	0.09141
Crohn's Disease	MTG	frc	A0A0R1HAW1	Firmicutes	Bacilli	Lactobacillales	Lactobacillaceae	Lactobacillus	Lactobacillus amylovorus DSM 20531	E5001	Crohn's Disease-L3	0.0417632
Crohn's Disease	MTG	frc	A0A174BHB6	Actinobacteria	Actinobacteria	Bifidobacteriales	Bifidobacteriaceae	Bifidobacterium	Bifidobacterium pseudocatenulatum	E5001	Crohn's Disease-L3	0.0198108
Crohn's Disease	MTG	frc	A0A1Q6EPI6	Actinobacteria	Actinobacteria	Bifidobacteriales	Bifidobacteriaceae	Bifidobacterium	Bifidobacterium sp. 56_9_plus	E5001	Crohn's Disease-L3	0.0274857
Crohn's Disease	MTG	frc	A0A1V8Q5N2	Actinobacteria	Actinobacteria	Bifidobacteriales	Bifidobacteriaceae	Bifidobacterium	Bifidobacterium dentium	E5001	Crohn's Disease-L3	0.0693687
Crohn's Disease	MTG	frc	A0A377BTA6	Proteobacteria	Gammaproteobacteria	Enterobacterales	Enterobacteriaceae	Escherichia	Escherichia coli	E5001	Crohn's Disease-L3	0.33606
Crohn's Disease	MTG	frc	A1ADQ1	Proteobacteria	Gammaproteobacteria	Enterobacterales	Enterobacteriaceae	Escherichia	Escherichia coli APEC O1	E5001	Crohn's Disease-L3	0.267534
Crohn's Disease	MTG	frc	G1U9U4	Firmicutes	Bacilli	Lactobacillales	Lactobacillaceae	Lactobacillus	Lactobacillus acidophilus	E5001	Crohn's Disease-L3	0.0833387
Crohn's Disease	MTS	frc	A0A377BTA6	Proteobacteria	Gammaproteobacteria	Enterobacterales	Enterobacteriaceae	Escherichia	Escherichia coli	E5001	Crohn's Disease-L3	0.0331767
Crohn's Disease	MTG	frc	A0A377BTA6	Proteobacteria	Gammaproteobacteria	Enterobacterales	Enterobacteriaceae	Escherichia	Escherichia coli	E5003	Crohn's Disease	0.0425555
Crohn's Disease	MTG	frc	A1ADQ1	Proteobacteria	Gammaproteobacteria	Enterobacterales	Enterobacteriaceae	Escherichia	Escherichia coli APEC O1	E5003	Crohn's Disease	0.0451129
Crohn's Disease	MTG	frc	C3X762	Proteobacteria	Betaproteobacteria	Burkholderiales	Oxalobacteraceae	Oxalobacter	Oxalobacter formigenes HOxBLS	E5003	Crohn's Disease	0.26557
Crohn's Disease	MTG	frc	O06644	Proteobacteria	Betaproteobacteria	Burkholderiales	Oxalobacteraceae	Oxalobacter	Oxalobacter formigenes	E5003	Crohn's Disease	0.263088
Crohn's Disease	MTG	frc	A0A377BTA6	Proteobacteria	Gammaproteobacteria	Enterobacterales	Enterobacteriaceae	Escherichia	Escherichia coli	E5003	Crohn's Disease-L3	0.0425555
Crohn's Disease	MTG	frc	A1ADQ1	Proteobacteria	Gammaproteobacteria	Enterobacterales	Enterobacteriaceae	Escherichia	Escherichia coli APEC O1	E5003	Crohn's Disease-L3	0.0451129
Crohn's Disease	MTG	frc	C3X762	Proteobacteria	Betaproteobacteria	Burkholderiales	Oxalobacteraceae	Oxalobacter	Oxalobacter formigenes HOxBLS	E5003	Crohn's Disease-L3	0.26557
Crohn's Disease	MTG	frc	O06644	Proteobacteria	Betaproteobacteria	Burkholderiales	Oxalobacteraceae	Oxalobacter	Oxalobacter formigenes	E5003	Crohn's Disease-L3	0.263088
Crohn's Disease	MTG	frc	A0A072MW66	Actinobacteria	Actinobacteria	Bifidobacteriales	Bifidobacteriaceae	Bifidobacterium	Bifidobacterium pseudocatenulatum IPLA36007	E5006	Crohn's Disease	0.0910528
Crohn's Disease	MTG	frc	A0A087ADU5	Actinobacteria	Actinobacteria	Bifidobacteriales	Bifidobacteriaceae	Bifidobacterium	Bifidobacterium choerinum	E5006	Crohn's Disease	0.0344466
Crohn's Disease	MTG	frc	A0A1V8Q5N2	Actinobacteria	Actinobacteria	Bifidobacteriales	Bifidobacteriaceae	Bifidobacterium	Bifidobacterium dentium	E5006	Crohn's Disease	0.278167
Crohn's Disease	MTG	frc	A0A377BTA6	Proteobacteria	Gammaproteobacteria	Enterobacterales	Enterobacteriaceae	Escherichia	Escherichia coli	E5006	Crohn's Disease	1.73243
Crohn's Disease	MTG	frc	A1ADQ1	Proteobacteria	Gammaproteobacteria	Enterobacterales	Enterobacteriaceae	Escherichia	Escherichia coli APEC O1	E5006	Crohn's Disease	0.296265
Crohn's Disease	MTG	frc	C3X762	Proteobacteria	Betaproteobacteria	Burkholderiales	Oxalobacteraceae	Oxalobacter	Oxalobacter formigenes HOxBLS	E5006	Crohn's Disease	0.0893179
Crohn's Disease	MTS	frc	C3X762	Proteobacteria	Betaproteobacteria	Burkholderiales	Oxalobacteraceae	Oxalobacter	Oxalobacter formigenes HOxBLS	E5006	Crohn's Disease	0.249509
Crohn's Disease	MTG	frc	A0A072MW66	Actinobacteria	Actinobacteria	Bifidobacteriales	Bifidobacteriaceae	Bifidobacterium	Bifidobacterium pseudocatenulatum IPLA36007	E5006	Crohn's Disease-nonL3	0.0910528
Crohn's Disease	MTG	frc	A0A087ADU5	Actinobacteria	Actinobacteria	Bifidobacteriales	Bifidobacteriaceae	Bifidobacterium	Bifidobacterium choerinum	E5006	Crohn's Disease-nonL3	0.0344466
Crohn's Disease	MTG	frc	A0A1V8Q5N2	Actinobacteria	Actinobacteria	Bifidobacteriales	Bifidobacteriaceae	Bifidobacterium	Bifidobacterium dentium	E5006	Crohn's Disease-nonL3	0.278167
Crohn's Disease	MTG	frc	A0A377BTA6	Proteobacteria	Gammaproteobacteria	Enterobacterales	Enterobacteriaceae	Escherichia	Escherichia coli	E5006	Crohn's Disease-nonL3	1.73243
Crohn's Disease	MTG	frc	A1ADQ1	Proteobacteria	Gammaproteobacteria	Enterobacterales	Enterobacteriaceae	Escherichia	Escherichia coli APEC O1	E5006	Crohn's Disease-nonL3	0.296265
Crohn's Disease	MTG	frc	C3X762	Proteobacteria	Betaproteobacteria	Burkholderiales	Oxalobacteraceae	Oxalobacter	Oxalobacter formigenes HOxBLS	E5006	Crohn's Disease-nonL3	0.0893179
Crohn's Disease	MTS	frc	C3X762	Proteobacteria	Betaproteobacteria	Burkholderiales	Oxalobacteraceae	Oxalobacter	Oxalobacter formigenes HOxBLS	E5006	Crohn's Disease-nonL3	0.249509
Crohn's Disease	MTG	frc	A0A072MW66	Actinobacteria	Actinobacteria	Bifidobacteriales	Bifidobacteriaceae	Bifidobacterium	Bifidobacterium pseudocatenulatum IPLA36007	E5009	Crohn's Disease	0.987266
Crohn's Disease	MTG	frc	A0A174BHB6	Actinobacteria	Actinobacteria	Bifidobacteriales	Bifidobacteriaceae	Bifidobacterium	Bifidobacterium pseudocatenulatum	E5009	Crohn's Disease	0.100012
Crohn's Disease	MTG	frc	A0A1Q6EPI6	Actinobacteria	Actinobacteria	Bifidobacteriales	Bifidobacteriaceae	Bifidobacterium	Bifidobacterium sp. 56_9_plus	E5009	Crohn's Disease	0.106803
Crohn's Disease	MTG	frc	A1ADQ1	Proteobacteria	Gammaproteobacteria	Enterobacterales	Enterobacteriaceae	Escherichia	Escherichia coli APEC O1	E5009	Crohn's Disease	0.19608
Crohn's Disease	MTG	frc	A0A072MW66	Actinobacteria	Actinobacteria	Bifidobacteriales	Bifidobacteriaceae	Bifidobacterium	Bifidobacterium pseudocatenulatum IPLA36007	E5009	Crohn's Disease-nonL3	0.987266
Crohn's Disease	MTG	frc	A0A174BHB6	Actinobacteria	Actinobacteria	Bifidobacteriales	Bifidobacteriaceae	Bifidobacterium	Bifidobacterium pseudocatenulatum	E5009	Crohn's Disease-nonL3	0.100012
Crohn's Disease	MTG	frc	A0A1Q6EPI6	Actinobacteria	Actinobacteria	Bifidobacteriales	Bifidobacteriaceae	Bifidobacterium	Bifidobacterium sp. 56_9_plus	E5009	Crohn's Disease-nonL3	0.106803
Crohn's Disease	MTG	frc	A1ADQ1	Proteobacteria	Gammaproteobacteria	Enterobacterales	Enterobacteriaceae	Escherichia	Escherichia coli APEC O1	E5009	Crohn's Disease-nonL3	0.19608
Crohn's Disease	MTG	frc	A0A377BTA6	Proteobacteria	Gammaproteobacteria	Enterobacterales	Enterobacteriaceae	Escherichia	Escherichia coli	E5013	Crohn's Disease	0.199743
Crohn's Disease	MTG	frc	A1ADQ1	Proteobacteria	Gammaproteobacteria	Enterobacterales	Enterobacteriaceae	Escherichia	Escherichia coli APEC O1	E5013	Crohn's Disease	0.360291
Crohn's Disease	MTG	frc	B5YYX4	Proteobacteria	Gammaproteobacteria	Enterobacterales	Enterobacteriaceae	Escherichia	Escherichia coli O157:H7 str. EC4115	E5013	Crohn's Disease	0.241198
Crohn's Disease	MTG	frc	C3X762	Proteobacteria	Betaproteobacteria	Burkholderiales	Oxalobacteraceae	Oxalobacter	Oxalobacter formigenes HOxBLS	E5013	Crohn's Disease	0.0479964
Crohn's Disease	MTG	frc	O06644	Proteobacteria	Betaproteobacteria	Burkholderiales	Oxalobacteraceae	Oxalobacter	Oxalobacter formigenes	E5013	Crohn's Disease	0.0213768
Crohn's Disease	MTS	frc	A0A1F3ZN52	Proteobacteria	Betaproteobacteria	NA	NA	NA	Betaproteobacteria bacterium RIFCSPLOWO2_02_FULL_6	E5013	Crohn's Disease	0.0822489
Crohn's Disease	MTS	frc	C3X2D4	Proteobacteria	Betaproteobacteria	Burkholderiales	Oxalobacteraceae	Oxalobacter	Oxalobacter formigenes HOxBLS	E5013	Crohn's Disease	0.0277369
Crohn's Disease	MTS	frc	C3X762	Proteobacteria	Betaproteobacteria	Burkholderiales	Oxalobacteraceae	Oxalobacter	Oxalobacter formigenes HOxBLS	E5013	Crohn's Disease	0.263905
Crohn's Disease	MTS	frc	O06644	Proteobacteria	Betaproteobacteria	Burkholderiales	Oxalobacteraceae	Oxalobacter	Oxalobacter formigenes	E5013	Crohn's Disease	0.142752
Crohn's Disease	MTG	frc	A0A377BTA6	Proteobacteria	Gammaproteobacteria	Enterobacterales	Enterobacteriaceae	Escherichia	Escherichia coli	E5013	Crohn's Disease-nonL3	0.199743
Crohn's Disease	MTG	frc	A1ADQ1	Proteobacteria	Gammaproteobacteria	Enterobacterales	Enterobacteriaceae	Escherichia	Escherichia coli APEC O1	E5013	Crohn's Disease-nonL3	0.360291
Crohn's Disease	MTG	frc	B5YYX4	Proteobacteria	Gammaproteobacteria	Enterobacterales	Enterobacteriaceae	Escherichia	Escherichia coli O157:H7 str. EC4115	E5013	Crohn's Disease-nonL3	0.241198
Crohn's Disease	MTG	frc	C3X762	Proteobacteria	Betaproteobacteria	Burkholderiales	Oxalobacteraceae	Oxalobacter	Oxalobacter formigenes HOxBLS	E5013	Crohn's Disease-nonL3	0.0479964
Crohn's Disease	MTG	frc	O06644	Proteobacteria	Betaproteobacteria	Burkholderiales	Oxalobacteraceae	Oxalobacter	Oxalobacter formigenes	E5013	Crohn's Disease-nonL3	0.0213768
Crohn's Disease	MTS	frc	A0A1F3ZN52	Proteobacteria	Betaproteobacteria	NA	NA	NA	Betaproteobacteria bacterium RIFCSPLOWO2_02_FULL_6	E5013	Crohn's Disease-nonL3	0.0822489
Crohn's Disease	MTS	frc	C3X2D4	Proteobacteria	Betaproteobacteria	Burkholderiales	Oxalobacteraceae	Oxalobacter	Oxalobacter formigenes HOxBLS	E5013	Crohn's Disease-nonL3	0.0277369
Crohn's Disease	MTS	frc	C3X762	Proteobacteria	Betaproteobacteria	Burkholderiales	Oxalobacteraceae	Oxalobacter	Oxalobacter formigenes HOxBLS	E5013	Crohn's Disease-nonL3	0.263905
Crohn's Disease	MTS	frc	O06644	Proteobacteria	Betaproteobacteria	Burkholderiales	Oxalobacteraceae	Oxalobacter	Oxalobacter formigenes	E5013	Crohn's Disease-nonL3	0.142752
Crohn's Disease	MTG	frc	A0A377BTA6	Proteobacteria	Gammaproteobacteria	Enterobacterales	Enterobacteriaceae	Escherichia	Escherichia coli	H4001	Crohn's Disease	0.681715
Crohn's Disease	MTG	frc	A1ADQ1	Proteobacteria	Gammaproteobacteria	Enterobacterales	Enterobacteriaceae	Escherichia	Escherichia coli APEC O1	H4001	Crohn's Disease	0.713381
Crohn's Disease	MTG	frc	Q8FFE8	Proteobacteria	Gammaproteobacteria	Enterobacterales	Enterobacteriaceae	Escherichia	Escherichia coli CFT073	H4001	Crohn's Disease	0.0617998
Crohn's Disease	MTG	frc	A0A377BTA6	Proteobacteria	Gammaproteobacteria	Enterobacterales	Enterobacteriaceae	Escherichia	Escherichia coli	H4001	Crohn's Disease-L3	0.681715
Crohn's Disease	MTG	frc	A1ADQ1	Proteobacteria	Gammaproteobacteria	Enterobacterales	Enterobacteriaceae	Escherichia	Escherichia coli APEC O1	H4001	Crohn's Disease-L3	0.713381
Crohn's Disease	MTG	frc	Q8FFE8	Proteobacteria	Gammaproteobacteria	Enterobacterales	Enterobacteriaceae	Escherichia	Escherichia coli CFT073	H4001	Crohn's Disease-L3	0.0617998
Crohn's Disease	MTG	frc	A0A016XI66	Proteobacteria	Betaproteobacteria	Burkholderiales	Comamonadaceae	Hylemonella	Hylemonella gracilis str. Niagara R	H4004	Crohn's Disease	0.0313926
Crohn's Disease	MTG	frc	A0A071LN49	Proteobacteria	Gammaproteobacteria	Enterobacterales	Enterobacteriaceae	Mangrovibacter	Mangrovibacter sp. MFB070	H4004	Crohn's Disease	0.0310971
Crohn's Disease	MTG	frc	A0A1U9T5R4	Proteobacteria	Gammaproteobacteria	Enterobacterales	Enterobacteriaceae	Escherichia	Escherichia coli	H4004	Crohn's Disease	0.0317699
Crohn's Disease	MTG	frc	A0A2S8JKC0	Proteobacteria	Gammaproteobacteria	Enterobacterales	Enterobacteriaceae	Escherichia	Escherichia coli	H4004	Crohn's Disease	0.0266454
Crohn's Disease	MTG	frc	A0A377BTA6	Proteobacteria	Gammaproteobacteria	Enterobacterales	Enterobacteriaceae	Escherichia	Escherichia coli	H4004	Crohn's Disease	1.47015
Crohn's Disease	MTG	frc	A1ADQ1	Proteobacteria	Gammaproteobacteria	Enterobacterales	Enterobacteriaceae	Escherichia	Escherichia coli APEC O1	H4004	Crohn's Disease	3.3292
Crohn's Disease	MTG	frc	B5YYX4	Proteobacteria	Gammaproteobacteria	Enterobacterales	Enterobacteriaceae	Escherichia	Escherichia coli O157:H7 str. EC4115	H4004	Crohn's Disease	0.444636
Crohn's Disease	MTS	frc	A0A377BTA6	Proteobacteria	Gammaproteobacteria	Enterobacterales	Enterobacteriaceae	Escherichia	Escherichia coli	H4004	Crohn's Disease	0.159066
Crohn's Disease	MTS	frc	A1ADQ1	Proteobacteria	Gammaproteobacteria	Enterobacterales	Enterobacteriaceae	Escherichia	Escherichia coli APEC O1	H4004	Crohn's Disease	0.0239334
Crohn's Disease	MTG	frc	A0A016XI66	Proteobacteria	Betaproteobacteria	Burkholderiales	Comamonadaceae	Hylemonella	Hylemonella gracilis str. Niagara R	H4004	Crohn's Disease-L3	0.0313926
Crohn's Disease	MTG	frc	A0A071LN49	Proteobacteria	Gammaproteobacteria	Enterobacterales	Enterobacteriaceae	Mangrovibacter	Mangrovibacter sp. MFB070	H4004	Crohn's Disease-L3	0.0310971
Crohn's Disease	MTG	frc	A0A1U9T5R4	Proteobacteria	Gammaproteobacteria	Enterobacterales	Enterobacteriaceae	Escherichia	Escherichia coli	H4004	Crohn's Disease-L3	0.0317699
Crohn's Disease	MTG	frc	A0A2S8JKC0	Proteobacteria	Gammaproteobacteria	Enterobacterales	Enterobacteriaceae	Escherichia	Escherichia coli	H4004	Crohn's Disease-L3	0.0266454
Crohn's Disease	MTG	frc	A0A377BTA6	Proteobacteria	Gammaproteobacteria	Enterobacterales	Enterobacteriaceae	Escherichia	Escherichia coli	H4004	Crohn's Disease-L3	1.47015
Crohn's Disease	MTG	frc	A1ADQ1	Proteobacteria	Gammaproteobacteria	Enterobacterales	Enterobacteriaceae	Escherichia	Escherichia coli APEC O1	H4004	Crohn's Disease-L3	3.3292
Crohn's Disease	MTG	frc	B5YYX4	Proteobacteria	Gammaproteobacteria	Enterobacterales	Enterobacteriaceae	Escherichia	Escherichia coli O157:H7 str. EC4115	H4004	Crohn's Disease-L3	0.444636
Crohn's Disease	MTS	frc	A0A377BTA6	Proteobacteria	Gammaproteobacteria	Enterobacterales	Enterobacteriaceae	Escherichia	Escherichia coli	H4004	Crohn's Disease-L3	0.159066
Crohn's Disease	MTS	frc	A1ADQ1	Proteobacteria	Gammaproteobacteria	Enterobacterales	Enterobacteriaceae	Escherichia	Escherichia coli APEC O1	H4004	Crohn's Disease-L3	0.0239334
Crohn's Disease	MTG	frc	A0A016XI66	Proteobacteria	Betaproteobacteria	Burkholderiales	Comamonadaceae	Hylemonella	Hylemonella gracilis str. Niagara R	H4006	Crohn's Disease	0.119656
Crohn's Disease	MTG	frc	A0A028EDB1	Proteobacteria	Gammaproteobacteria	Enterobacterales	Enterobacteriaceae	Escherichia	Escherichia coli O118:H16 str. 2009C-4446	H4006	Crohn's Disease	0.060547
Crohn's Disease	MTG	frc	A0A072MW66	Actinobacteria	Actinobacteria	Bifidobacteriales	Bifidobacteriaceae	Bifidobacterium	Bifidobacterium pseudocatenulatum IPLA36007	H4006	Crohn's Disease	0.425405
Crohn's Disease	MTG	frc	A0A073JPH8	Firmicutes	Bacilli	Lactobacillales	Lactobacillaceae	Lactobacillus	Lactobacillus reuteri	H4006	Crohn's Disease	0.0196742
Crohn's Disease	MTG	frc	A0A087QB11	Firmicutes	Bacilli	Lactobacillales	Lactobacillaceae	Lactobacillus	Lactobacillus gasseri SV-16A-US	H4006	Crohn's Disease	0.0583781
Crohn's Disease	MTG	frc	A0A0L0ALL8	Proteobacteria	Gammaproteobacteria	Enterobacterales	Enterobacteriaceae	Klebsiella	Klebsiella sp. RIT-PI-d	H4006	Crohn's Disease	0.060547
Crohn's Disease	MTG	frc	A0A174BHB6	Actinobacteria	Actinobacteria	Bifidobacteriales	Bifidobacteriaceae	Bifidobacterium	Bifidobacterium pseudocatenulatum	H4006	Crohn's Disease	0.0734487
Crohn's Disease	MTG	frc	A0A1Q6EPI6	Actinobacteria	Actinobacteria	Bifidobacteriales	Bifidobacteriaceae	Bifidobacterium	Bifidobacterium sp. 56_9_plus	H4006	Crohn's Disease	0.181905
Crohn's Disease	MTG	frc	A0A2X5G0L0	Proteobacteria	Gammaproteobacteria	Enterobacterales	Enterobacteriaceae	Escherichia	Escherichia coli	H4006	Crohn's Disease	0.135714
Crohn's Disease	MTG	frc	A0A2Z2J8H3	Proteobacteria	Gammaproteobacteria	Enterobacterales	Enterobacteriaceae	Escherichia	Escherichia coli	H4006	Crohn's Disease	0.0352198
Crohn's Disease	MTG	frc	A0A369DPH8	Proteobacteria	Gammaproteobacteria	Enterobacterales	Enterobacteriaceae	Escherichia	Escherichia coli	H4006	Crohn's Disease	0.060547
Crohn's Disease	MTG	frc	A0A369G9R5	Proteobacteria	Gammaproteobacteria	Enterobacterales	Enterobacteriaceae	Escherichia	Escherichia coli	H4006	Crohn's Disease	0.060547
Crohn's Disease	MTG	frc	A0A377BTA6	Proteobacteria	Gammaproteobacteria	Enterobacterales	Enterobacteriaceae	Escherichia	Escherichia coli	H4006	Crohn's Disease	0.309306
Crohn's Disease	MTG	frc	A1ADQ1	Proteobacteria	Gammaproteobacteria	Enterobacterales	Enterobacteriaceae	Escherichia	Escherichia coli APEC O1	H4006	Crohn's Disease	3.22555
Crohn's Disease	MTG	frc	B5YYX4	Proteobacteria	Gammaproteobacteria	Enterobacterales	Enterobacteriaceae	Escherichia	Escherichia coli O157:H7 str. EC4115	H4006	Crohn's Disease	0.55168
Crohn's Disease	MTS	frc	A0A072MW66	Actinobacteria	Actinobacteria	Bifidobacteriales	Bifidobacteriaceae	Bifidobacterium	Bifidobacterium pseudocatenulatum IPLA36007	H4006	Crohn's Disease	0.0718075
Crohn's Disease	MTS	frc	A1ADQ1	Proteobacteria	Gammaproteobacteria	Enterobacterales	Enterobacteriaceae	Escherichia	Escherichia coli APEC O1	H4006	Crohn's Disease	0.0819381
Crohn's Disease	MTS	frc	O06644	Proteobacteria	Betaproteobacteria	Burkholderiales	Oxalobacteraceae	Oxalobacter	Oxalobacter formigenes	H4006	Crohn's Disease	0.0662682
Crohn's Disease	MTG	frc	A0A016XI66	Proteobacteria	Betaproteobacteria	Burkholderiales	Comamonadaceae	Hylemonella	Hylemonella gracilis str. Niagara R	H4006	Crohn's Disease-nonL3	0.119656
Crohn's Disease	MTG	frc	A0A028EDB1	Proteobacteria	Gammaproteobacteria	Enterobacterales	Enterobacteriaceae	Escherichia	Escherichia coli O118:H16 str. 2009C-4446	H4006	Crohn's Disease-nonL3	0.060547
Crohn's Disease	MTG	frc	A0A072MW66	Actinobacteria	Actinobacteria	Bifidobacteriales	Bifidobacteriaceae	Bifidobacterium	Bifidobacterium pseudocatenulatum IPLA36007	H4006	Crohn's Disease-nonL3	0.425405
Crohn's Disease	MTG	frc	A0A073JPH8	Firmicutes	Bacilli	Lactobacillales	Lactobacillaceae	Lactobacillus	Lactobacillus reuteri	H4006	Crohn's Disease-nonL3	0.0196742
Crohn's Disease	MTG	frc	A0A087QB11	Firmicutes	Bacilli	Lactobacillales	Lactobacillaceae	Lactobacillus	Lactobacillus gasseri SV-16A-US	H4006	Crohn's Disease-nonL3	0.0583781
Crohn's Disease	MTG	frc	A0A0L0ALL8	Proteobacteria	Gammaproteobacteria	Enterobacterales	Enterobacteriaceae	Klebsiella	Klebsiella sp. RIT-PI-d	H4006	Crohn's Disease-nonL3	0.060547
Crohn's Disease	MTG	frc	A0A174BHB6	Actinobacteria	Actinobacteria	Bifidobacteriales	Bifidobacteriaceae	Bifidobacterium	Bifidobacterium pseudocatenulatum	H4006	Crohn's Disease-nonL3	0.0734487
Crohn's Disease	MTG	frc	A0A1Q6EPI6	Actinobacteria	Actinobacteria	Bifidobacteriales	Bifidobacteriaceae	Bifidobacterium	Bifidobacterium sp. 56_9_plus	H4006	Crohn's Disease-nonL3	0.181905
Crohn's Disease	MTG	frc	A0A2X5G0L0	Proteobacteria	Gammaproteobacteria	Enterobacterales	Enterobacteriaceae	Escherichia	Escherichia coli	H4006	Crohn's Disease-nonL3	0.135714
Crohn's Disease	MTG	frc	A0A2Z2J8H3	Proteobacteria	Gammaproteobacteria	Enterobacterales	Enterobacteriaceae	Escherichia	Escherichia coli	H4006	Crohn's Disease-nonL3	0.0352198
Crohn's Disease	MTG	frc	A0A369DPH8	Proteobacteria	Gammaproteobacteria	Enterobacterales	Enterobacteriaceae	Escherichia	Escherichia coli	H4006	Crohn's Disease-nonL3	0.060547
Crohn's Disease	MTG	frc	A0A369G9R5	Proteobacteria	Gammaproteobacteria	Enterobacterales	Enterobacteriaceae	Escherichia	Escherichia coli	H4006	Crohn's Disease-nonL3	0.060547
Crohn's Disease	MTG	frc	A0A377BTA6	Proteobacteria	Gammaproteobacteria	Enterobacterales	Enterobacteriaceae	Escherichia	Escherichia coli	H4006	Crohn's Disease-nonL3	0.309306
Crohn's Disease	MTG	frc	A1ADQ1	Proteobacteria	Gammaproteobacteria	Enterobacterales	Enterobacteriaceae	Escherichia	Escherichia coli APEC O1	H4006	Crohn's Disease-nonL3	3.22555
Crohn's Disease	MTG	frc	B5YYX4	Proteobacteria	Gammaproteobacteria	Enterobacterales	Enterobacteriaceae	Escherichia	Escherichia coli O157:H7 str. EC4115	H4006	Crohn's Disease-nonL3	0.55168
Crohn's Disease	MTS	frc	A0A072MW66	Actinobacteria	Actinobacteria	Bifidobacteriales	Bifidobacteriaceae	Bifidobacterium	Bifidobacterium pseudocatenulatum IPLA36007	H4006	Crohn's Disease-nonL3	0.0718075
Crohn's Disease	MTS	frc	A1ADQ1	Proteobacteria	Gammaproteobacteria	Enterobacterales	Enterobacteriaceae	Escherichia	Escherichia coli APEC O1	H4006	Crohn's Disease-nonL3	0.0819381
Crohn's Disease	MTS	frc	O06644	Proteobacteria	Betaproteobacteria	Burkholderiales	Oxalobacteraceae	Oxalobacter	Oxalobacter formigenes	H4006	Crohn's Disease-nonL3	0.0662682
Crohn's Disease	MTG	frc	A0A377BTA6	Proteobacteria	Gammaproteobacteria	Enterobacterales	Enterobacteriaceae	Escherichia	Escherichia coli	H4007	Crohn's Disease	0.0415883
Crohn's Disease	MTG	frc	A1ADQ1	Proteobacteria	Gammaproteobacteria	Enterobacterales	Enterobacteriaceae	Escherichia	Escherichia coli APEC O1	H4007	Crohn's Disease	0.10718
Crohn's Disease	MTG	frc	A0A377BTA6	Proteobacteria	Gammaproteobacteria	Enterobacterales	Enterobacteriaceae	Escherichia	Escherichia coli	H4007	Crohn's Disease-L3	0.0415883
Crohn's Disease	MTG	frc	A1ADQ1	Proteobacteria	Gammaproteobacteria	Enterobacterales	Enterobacteriaceae	Escherichia	Escherichia coli APEC O1	H4007	Crohn's Disease-L3	0.10718
Crohn's Disease	MTG	frc	A0A016XI66	Proteobacteria	Betaproteobacteria	Burkholderiales	Comamonadaceae	Hylemonella	Hylemonella gracilis str. Niagara R	H4012	Crohn's Disease	0.0449872
Crohn's Disease	MTG	frc	A0A377BTA6	Proteobacteria	Gammaproteobacteria	Enterobacterales	Enterobacteriaceae	Escherichia	Escherichia coli	H4012	Crohn's Disease	0.343576
Crohn's Disease	MTG	frc	A1ADQ1	Proteobacteria	Gammaproteobacteria	Enterobacterales	Enterobacteriaceae	Escherichia	Escherichia coli APEC O1	H4012	Crohn's Disease	2.18534
Crohn's Disease	MTG	frc	A0A016XI66	Proteobacteria	Betaproteobacteria	Burkholderiales	Comamonadaceae	Hylemonella	Hylemonella gracilis str. Niagara R	H4012	Crohn's Disease-L3	0.0449872
Crohn's Disease	MTG	frc	A0A377BTA6	Proteobacteria	Gammaproteobacteria	Enterobacterales	Enterobacteriaceae	Escherichia	Escherichia coli	H4012	Crohn's Disease-L3	0.343576
Crohn's Disease	MTG	frc	A1ADQ1	Proteobacteria	Gammaproteobacteria	Enterobacterales	Enterobacteriaceae	Escherichia	Escherichia coli APEC O1	H4012	Crohn's Disease-L3	2.18534
Crohn's Disease	MTG	frc	A0A1B7JUB4	Proteobacteria	Gammaproteobacteria	Enterobacterales	Morganellaceae	Providencia	Providencia heimbachae ATCC 35613	H4014	Crohn's Disease	0.0289831
Crohn's Disease	MTG	frc	A0A1B7KKZ3	Proteobacteria	Gammaproteobacteria	Enterobacterales	Hafniaceae	Obesumbacterium	Obesumbacterium proteus ATCC 12841	H4014	Crohn's Disease	0.0666517
Crohn's Disease	MTG	frc	A0A1M4E412	Actinobacteria	Actinobacteria	Streptosporangiales	Streptosporangiaceae	Nonomuraea	Nonomuraea gerenzanensis	H4014	Crohn's Disease	0.0553202
Crohn's Disease	MTG	frc	A0A2S8JKC0	Proteobacteria	Gammaproteobacteria	Enterobacterales	Enterobacteriaceae	Escherichia	Escherichia coli	H4014	Crohn's Disease	0.0742683
Crohn's Disease	MTG	frc	A0A2V7C257	Candidatus Rokubacteria	NA	NA	NA	NA	Candidatus Rokubacteria bacterium	H4014	Crohn's Disease	0.028573
Crohn's Disease	MTG	frc	A0A377BTA6	Proteobacteria	Gammaproteobacteria	Enterobacterales	Enterobacteriaceae	Escherichia	Escherichia coli	H4014	Crohn's Disease	1.98897
Crohn's Disease	MTG	frc	A1ADQ1	Proteobacteria	Gammaproteobacteria	Enterobacterales	Enterobacteriaceae	Escherichia	Escherichia coli APEC O1	H4014	Crohn's Disease	5.29792
Crohn's Disease	MTG	frc	A0A1B7JUB4	Proteobacteria	Gammaproteobacteria	Enterobacterales	Morganellaceae	Providencia	Providencia heimbachae ATCC 35613	H4014	Crohn's Disease-L3	0.0289831
Crohn's Disease	MTG	frc	A0A1B7KKZ3	Proteobacteria	Gammaproteobacteria	Enterobacterales	Hafniaceae	Obesumbacterium	Obesumbacterium proteus ATCC 12841	H4014	Crohn's Disease-L3	0.0666517
Crohn's Disease	MTG	frc	A0A1M4E412	Actinobacteria	Actinobacteria	Streptosporangiales	Streptosporangiaceae	Nonomuraea	Nonomuraea gerenzanensis	H4014	Crohn's Disease-L3	0.0553202
Crohn's Disease	MTG	frc	A0A2S8JKC0	Proteobacteria	Gammaproteobacteria	Enterobacterales	Enterobacteriaceae	Escherichia	Escherichia coli	H4014	Crohn's Disease-L3	0.0742683
Crohn's Disease	MTG	frc	A0A2V7C257	Candidatus Rokubacteria	NA	NA	NA	NA	Candidatus Rokubacteria bacterium	H4014	Crohn's Disease-L3	0.028573
Crohn's Disease	MTG	frc	A0A377BTA6	Proteobacteria	Gammaproteobacteria	Enterobacterales	Enterobacteriaceae	Escherichia	Escherichia coli	H4014	Crohn's Disease-L3	1.98897
Crohn's Disease	MTG	frc	A1ADQ1	Proteobacteria	Gammaproteobacteria	Enterobacterales	Enterobacteriaceae	Escherichia	Escherichia coli APEC O1	H4014	Crohn's Disease-L3	5.29792
Crohn's Disease	MTG	frc	A0A062XDE4	Firmicutes	Bacilli	Lactobacillales	Lactobacillaceae	Lactobacillus	Lactobacillus animalis	H4015	Crohn's Disease	0.0281988
Crohn's Disease	MTG	frc	A0A072MW66	Actinobacteria	Actinobacteria	Bifidobacteriales	Bifidobacteriaceae	Bifidobacterium	Bifidobacterium pseudocatenulatum IPLA36007	H4015	Crohn's Disease	0.0659666
Crohn's Disease	MTG	frc	A0A087ADU5	Actinobacteria	Actinobacteria	Bifidobacteriales	Bifidobacteriaceae	Bifidobacterium	Bifidobacterium choerinum	H4015	Crohn's Disease	0.0690023
Crohn's Disease	MTG	frc	A0A087QB11	Firmicutes	Bacilli	Lactobacillales	Lactobacillaceae	Lactobacillus	Lactobacillus gasseri SV-16A-US	H4015	Crohn's Disease	0.112795
Crohn's Disease	MTG	frc	A0A0L7ANW7	Proteobacteria	Gammaproteobacteria	Enterobacterales	Enterobacteriaceae	Escherichia	Escherichia coli	H4015	Crohn's Disease	0.0306391
Crohn's Disease	MTG	frc	A0A174BHB6	Actinobacteria	Actinobacteria	Bifidobacteriales	Bifidobacteriaceae	Bifidobacterium	Bifidobacterium pseudocatenulatum	H4015	Crohn's Disease	0.0389037
Crohn's Disease	MTG	frc	A0A1V8Q5N2	Actinobacteria	Actinobacteria	Bifidobacteriales	Bifidobacteriaceae	Bifidobacterium	Bifidobacterium dentium	H4015	Crohn's Disease	0.0944095
Crohn's Disease	MTG	frc	A0A248X7K1	Actinobacteria	Actinobacteria	Bifidobacteriales	Bifidobacteriaceae	Bifidobacterium	Bifidobacterium pseudolongum	H4015	Crohn's Disease	0.0574138
Crohn's Disease	MTG	frc	A0A377BTA6	Proteobacteria	Gammaproteobacteria	Enterobacterales	Enterobacteriaceae	Escherichia	Escherichia coli	H4015	Crohn's Disease	9.1294
Crohn's Disease	MTG	frc	A1ADQ1	Proteobacteria	Gammaproteobacteria	Enterobacterales	Enterobacteriaceae	Escherichia	Escherichia coli APEC O1	H4015	Crohn's Disease	1.59729
Crohn's Disease	MTG	frc	H5WKK1	Proteobacteria	Betaproteobacteria	Burkholderiales	NA	NA	Burkholderiales bacterium JOSHI_001	H4015	Crohn's Disease	0.030061
Crohn's Disease	MTS	frc	A0A377BTA6	Proteobacteria	Gammaproteobacteria	Enterobacterales	Enterobacteriaceae	Escherichia	Escherichia coli	H4015	Crohn's Disease	17.4576
Crohn's Disease	MTS	frc	A1ADQ1	Proteobacteria	Gammaproteobacteria	Enterobacterales	Enterobacteriaceae	Escherichia	Escherichia coli APEC O1	H4015	Crohn's Disease	1.68243
Crohn's Disease	MTS	frc	C3X2D4	Proteobacteria	Betaproteobacteria	Burkholderiales	Oxalobacteraceae	Oxalobacter	Oxalobacter formigenes HOxBLS	H4015	Crohn's Disease	0.0380462
Crohn's Disease	MTG	frc	A0A062XDE4	Firmicutes	Bacilli	Lactobacillales	Lactobacillaceae	Lactobacillus	Lactobacillus animalis	H4015	Crohn's Disease-L3	0.0281988
Crohn's Disease	MTG	frc	A0A072MW66	Actinobacteria	Actinobacteria	Bifidobacteriales	Bifidobacteriaceae	Bifidobacterium	Bifidobacterium pseudocatenulatum IPLA36007	H4015	Crohn's Disease-L3	0.0659666
Crohn's Disease	MTG	frc	A0A087ADU5	Actinobacteria	Actinobacteria	Bifidobacteriales	Bifidobacteriaceae	Bifidobacterium	Bifidobacterium choerinum	H4015	Crohn's Disease-L3	0.0690023
Crohn's Disease	MTG	frc	A0A087QB11	Firmicutes	Bacilli	Lactobacillales	Lactobacillaceae	Lactobacillus	Lactobacillus gasseri SV-16A-US	H4015	Crohn's Disease-L3	0.112795
Crohn's Disease	MTG	frc	A0A0L7ANW7	Proteobacteria	Gammaproteobacteria	Enterobacterales	Enterobacteriaceae	Escherichia	Escherichia coli	H4015	Crohn's Disease-L3	0.0306391
Crohn's Disease	MTG	frc	A0A174BHB6	Actinobacteria	Actinobacteria	Bifidobacteriales	Bifidobacteriaceae	Bifidobacterium	Bifidobacterium pseudocatenulatum	H4015	Crohn's Disease-L3	0.0389037
Crohn's Disease	MTG	frc	A0A1V8Q5N2	Actinobacteria	Actinobacteria	Bifidobacteriales	Bifidobacteriaceae	Bifidobacterium	Bifidobacterium dentium	H4015	Crohn's Disease-L3	0.0944095
Crohn's Disease	MTG	frc	A0A248X7K1	Actinobacteria	Actinobacteria	Bifidobacteriales	Bifidobacteriaceae	Bifidobacterium	Bifidobacterium pseudolongum	H4015	Crohn's Disease-L3	0.0574138
Crohn's Disease	MTG	frc	A0A377BTA6	Proteobacteria	Gammaproteobacteria	Enterobacterales	Enterobacteriaceae	Escherichia	Escherichia coli	H4015	Crohn's Disease-L3	9.1294
Crohn's Disease	MTG	frc	A1ADQ1	Proteobacteria	Gammaproteobacteria	Enterobacterales	Enterobacteriaceae	Escherichia	Escherichia coli APEC O1	H4015	Crohn's Disease-L3	1.59729
Crohn's Disease	MTG	frc	H5WKK1	Proteobacteria	Betaproteobacteria	Burkholderiales	NA	NA	Burkholderiales bacterium JOSHI_001	H4015	Crohn's Disease-L3	0.030061
Crohn's Disease	MTS	frc	A0A377BTA6	Proteobacteria	Gammaproteobacteria	Enterobacterales	Enterobacteriaceae	Escherichia	Escherichia coli	H4015	Crohn's Disease-L3	17.4576
Crohn's Disease	MTS	frc	A1ADQ1	Proteobacteria	Gammaproteobacteria	Enterobacterales	Enterobacteriaceae	Escherichia	Escherichia coli APEC O1	H4015	Crohn's Disease-L3	1.68243
Crohn's Disease	MTS	frc	C3X2D4	Proteobacteria	Betaproteobacteria	Burkholderiales	Oxalobacteraceae	Oxalobacter	Oxalobacter formigenes HOxBLS	H4015	Crohn's Disease-L3	0.0380462
Crohn's Disease	MTG	frc	A0A016XI66	Proteobacteria	Betaproteobacteria	Burkholderiales	Comamonadaceae	Hylemonella	Hylemonella gracilis str. Niagara R	H4017	Crohn's Disease	0.0563207
Crohn's Disease	MTG	frc	A0A028EDB1	Proteobacteria	Gammaproteobacteria	Enterobacterales	Enterobacteriaceae	Escherichia	Escherichia coli O118:H16 str. 2009C-4446	H4017	Crohn's Disease	0.0569976
Crohn's Disease	MTG	frc	A0A062XDE4	Firmicutes	Bacilli	Lactobacillales	Lactobacillaceae	Lactobacillus	Lactobacillus animalis	H4017	Crohn's Disease	0.0339283
Crohn's Disease	MTG	frc	A0A071LN49	Proteobacteria	Gammaproteobacteria	Enterobacterales	Enterobacteriaceae	Mangrovibacter	Mangrovibacter sp. MFB070	H4017	Crohn's Disease	0.0557906
Crohn's Disease	MTG	frc	A0A087QB11	Firmicutes	Bacilli	Lactobacillales	Lactobacillaceae	Lactobacillus	Lactobacillus gasseri SV-16A-US	H4017	Crohn's Disease	0.0804267
Crohn's Disease	MTG	frc	A0A0K4YN22	Proteobacteria	Gammaproteobacteria	Enterobacterales	Enterobacteriaceae	Escherichia	Escherichia coli	H4017	Crohn's Disease	0.0569976
Crohn's Disease	MTG	frc	A0A0K8PM01	Actinobacteria	Actinobacteria	Streptomycetales	Streptomycetaceae	Streptomyces	Streptomyces azureus	H4017	Crohn's Disease	0.024281
Crohn's Disease	MTG	frc	A0A0L7ANW7	Proteobacteria	Gammaproteobacteria	Enterobacterales	Enterobacteriaceae	Escherichia	Escherichia coli	H4017	Crohn's Disease	0.0569976
Crohn's Disease	MTG	frc	A0A0R1PNQ4	Firmicutes	Bacilli	Lactobacillales	Lactobacillaceae	Lactobacillus	Lactobacillus kefiranofaciens subsp. kefirgranum D	H4017	Crohn's Disease	0.0599047
Crohn's Disease	MTG	frc	A0A1X3JFJ1	Proteobacteria	Gammaproteobacteria	Enterobacterales	Enterobacteriaceae	Escherichia	Escherichia coli H386	H4017	Crohn's Disease	0.0569976
Crohn's Disease	MTG	frc	A0A2V7C257	Candidatus Rokubacteria	NA	NA	NA	NA	Candidatus Rokubacteria bacterium	H4017	Crohn's Disease	0.0284116
Crohn's Disease	MTG	frc	A0A2X1KJL9	Proteobacteria	Gammaproteobacteria	Enterobacterales	Enterobacteriaceae	Escherichia	Escherichia coli	H4017	Crohn's Disease	0.0743292
Crohn's Disease	MTG	frc	A0A2X5G0L0	Proteobacteria	Gammaproteobacteria	Enterobacterales	Enterobacteriaceae	Escherichia	Escherichia coli	H4017	Crohn's Disease	5.08622
Crohn's Disease	MTG	frc	A0A377BTA6	Proteobacteria	Gammaproteobacteria	Enterobacterales	Enterobacteriaceae	Escherichia	Escherichia coli	H4017	Crohn's Disease	11.7823
Crohn's Disease	MTG	frc	A0A377D274	Proteobacteria	Gammaproteobacteria	Enterobacterales	Enterobacteriaceae	Escherichia	Escherichia coli	H4017	Crohn's Disease	0.0386106
Crohn's Disease	MTG	frc	A1ADQ1	Proteobacteria	Gammaproteobacteria	Enterobacterales	Enterobacteriaceae	Escherichia	Escherichia coli APEC O1	H4017	Crohn's Disease	20.1225
Crohn's Disease	MTG	frc	B5YYX4	Proteobacteria	Gammaproteobacteria	Enterobacterales	Enterobacteriaceae	Escherichia	Escherichia coli O157:H7 str. EC4115	H4017	Crohn's Disease	0.0569976
Crohn's Disease	MTG	frc	C7XLI6	Firmicutes	Bacilli	Lactobacillales	Lactobacillaceae	Lactobacillus	Lactobacillus crispatus 125-2-CHN	H4017	Crohn's Disease	0.0201041
Crohn's Disease	MTG	frc	Q8FFE8	Proteobacteria	Gammaproteobacteria	Enterobacterales	Enterobacteriaceae	Escherichia	Escherichia coli CFT073	H4017	Crohn's Disease	0.0429778
Crohn's Disease	MTS	frc	A0A2X5G0L0	Proteobacteria	Gammaproteobacteria	Enterobacterales	Enterobacteriaceae	Escherichia	Escherichia coli	H4017	Crohn's Disease	0.473658
Crohn's Disease	MTS	frc	A0A377BTA6	Proteobacteria	Gammaproteobacteria	Enterobacterales	Enterobacteriaceae	Escherichia	Escherichia coli	H4017	Crohn's Disease	0.935835
Crohn's Disease	MTS	frc	A1ADQ1	Proteobacteria	Gammaproteobacteria	Enterobacterales	Enterobacteriaceae	Escherichia	Escherichia coli APEC O1	H4017	Crohn's Disease	0.15365
Crohn's Disease	MTG	frc	A0A016XI66	Proteobacteria	Betaproteobacteria	Burkholderiales	Comamonadaceae	Hylemonella	Hylemonella gracilis str. Niagara R	H4017	Crohn's Disease-L3	0.0563207
Crohn's Disease	MTG	frc	A0A028EDB1	Proteobacteria	Gammaproteobacteria	Enterobacterales	Enterobacteriaceae	Escherichia	Escherichia coli O118:H16 str. 2009C-4446	H4017	Crohn's Disease-L3	0.0569976
Crohn's Disease	MTG	frc	A0A062XDE4	Firmicutes	Bacilli	Lactobacillales	Lactobacillaceae	Lactobacillus	Lactobacillus animalis	H4017	Crohn's Disease-L3	0.0339283
Crohn's Disease	MTG	frc	A0A071LN49	Proteobacteria	Gammaproteobacteria	Enterobacterales	Enterobacteriaceae	Mangrovibacter	Mangrovibacter sp. MFB070	H4017	Crohn's Disease-L3	0.0557906
Crohn's Disease	MTG	frc	A0A087QB11	Firmicutes	Bacilli	Lactobacillales	Lactobacillaceae	Lactobacillus	Lactobacillus gasseri SV-16A-US	H4017	Crohn's Disease-L3	0.0804267
Crohn's Disease	MTG	frc	A0A0K4YN22	Proteobacteria	Gammaproteobacteria	Enterobacterales	Enterobacteriaceae	Escherichia	Escherichia coli	H4017	Crohn's Disease-L3	0.0569976
Crohn's Disease	MTG	frc	A0A0K8PM01	Actinobacteria	Actinobacteria	Streptomycetales	Streptomycetaceae	Streptomyces	Streptomyces azureus	H4017	Crohn's Disease-L3	0.024281
Crohn's Disease	MTG	frc	A0A0L7ANW7	Proteobacteria	Gammaproteobacteria	Enterobacterales	Enterobacteriaceae	Escherichia	Escherichia coli	H4017	Crohn's Disease-L3	0.0569976
Crohn's Disease	MTG	frc	A0A0R1PNQ4	Firmicutes	Bacilli	Lactobacillales	Lactobacillaceae	Lactobacillus	Lactobacillus kefiranofaciens subsp. kefirgranum D	H4017	Crohn's Disease-L3	0.0599047
Crohn's Disease	MTG	frc	A0A1X3JFJ1	Proteobacteria	Gammaproteobacteria	Enterobacterales	Enterobacteriaceae	Escherichia	Escherichia coli H386	H4017	Crohn's Disease-L3	0.0569976
Crohn's Disease	MTG	frc	A0A2V7C257	Candidatus Rokubacteria	NA	NA	NA	NA	Candidatus Rokubacteria bacterium	H4017	Crohn's Disease-L3	0.0284116
Crohn's Disease	MTG	frc	A0A2X1KJL9	Proteobacteria	Gammaproteobacteria	Enterobacterales	Enterobacteriaceae	Escherichia	Escherichia coli	H4017	Crohn's Disease-L3	0.0743292
Crohn's Disease	MTG	frc	A0A2X5G0L0	Proteobacteria	Gammaproteobacteria	Enterobacterales	Enterobacteriaceae	Escherichia	Escherichia coli	H4017	Crohn's Disease-L3	5.08622
Crohn's Disease	MTG	frc	A0A377BTA6	Proteobacteria	Gammaproteobacteria	Enterobacterales	Enterobacteriaceae	Escherichia	Escherichia coli	H4017	Crohn's Disease-L3	11.7823
Crohn's Disease	MTG	frc	A0A377D274	Proteobacteria	Gammaproteobacteria	Enterobacterales	Enterobacteriaceae	Escherichia	Escherichia coli	H4017	Crohn's Disease-L3	0.0386106
Crohn's Disease	MTG	frc	A1ADQ1	Proteobacteria	Gammaproteobacteria	Enterobacterales	Enterobacteriaceae	Escherichia	Escherichia coli APEC O1	H4017	Crohn's Disease-L3	20.1225
Crohn's Disease	MTG	frc	B5YYX4	Proteobacteria	Gammaproteobacteria	Enterobacterales	Enterobacteriaceae	Escherichia	Escherichia coli O157:H7 str. EC4115	H4017	Crohn's Disease-L3	0.0569976
Crohn's Disease	MTG	frc	C7XLI6	Firmicutes	Bacilli	Lactobacillales	Lactobacillaceae	Lactobacillus	Lactobacillus crispatus 125-2-CHN	H4017	Crohn's Disease-L3	0.0201041
Crohn's Disease	MTG	frc	Q8FFE8	Proteobacteria	Gammaproteobacteria	Enterobacterales	Enterobacteriaceae	Escherichia	Escherichia coli CFT073	H4017	Crohn's Disease-L3	0.0429778
Crohn's Disease	MTS	frc	A0A2X5G0L0	Proteobacteria	Gammaproteobacteria	Enterobacterales	Enterobacteriaceae	Escherichia	Escherichia coli	H4017	Crohn's Disease-L3	0.473658
Crohn's Disease	MTS	frc	A0A377BTA6	Proteobacteria	Gammaproteobacteria	Enterobacterales	Enterobacteriaceae	Escherichia	Escherichia coli	H4017	Crohn's Disease-L3	0.935835
Crohn's Disease	MTS	frc	A1ADQ1	Proteobacteria	Gammaproteobacteria	Enterobacterales	Enterobacteriaceae	Escherichia	Escherichia coli APEC O1	H4017	Crohn's Disease-L3	0.15365
Crohn's Disease	MTG	frc	A0A377BTA6	Proteobacteria	Gammaproteobacteria	Enterobacterales	Enterobacteriaceae	Escherichia	Escherichia coli	H4020	Crohn's Disease	0.256986
Crohn's Disease	MTG	frc	A1ADQ1	Proteobacteria	Gammaproteobacteria	Enterobacterales	Enterobacteriaceae	Escherichia	Escherichia coli APEC O1	H4020	Crohn's Disease	0.132036
Crohn's Disease	MTS	frc	A0A377BTA6	Proteobacteria	Gammaproteobacteria	Enterobacterales	Enterobacteriaceae	Escherichia	Escherichia coli	H4020	Crohn's Disease	0.106659
Crohn's Disease	MTG	frc	A0A377BTA6	Proteobacteria	Gammaproteobacteria	Enterobacterales	Enterobacteriaceae	Escherichia	Escherichia coli	H4020	Crohn's Disease-nonL3	0.256986
Crohn's Disease	MTG	frc	A1ADQ1	Proteobacteria	Gammaproteobacteria	Enterobacterales	Enterobacteriaceae	Escherichia	Escherichia coli APEC O1	H4020	Crohn's Disease-nonL3	0.132036
Crohn's Disease	MTS	frc	A0A377BTA6	Proteobacteria	Gammaproteobacteria	Enterobacterales	Enterobacteriaceae	Escherichia	Escherichia coli	H4020	Crohn's Disease-nonL3	0.106659
Crohn's Disease	MTG	frc	A0A1F3ZN52	Proteobacteria	Betaproteobacteria	NA	NA	NA	Betaproteobacteria bacterium RIFCSPLOWO2_02_FULL_6	H4028	Crohn's Disease	0.0348756
Crohn's Disease	MTG	frc	A0A377BTA6	Proteobacteria	Gammaproteobacteria	Enterobacterales	Enterobacteriaceae	Escherichia	Escherichia coli	H4028	Crohn's Disease	0.165105
Crohn's Disease	MTG	frc	A1ADQ1	Proteobacteria	Gammaproteobacteria	Enterobacterales	Enterobacteriaceae	Escherichia	Escherichia coli APEC O1	H4028	Crohn's Disease	0.520953
Crohn's Disease	MTG	frc	B7MY33	Proteobacteria	Gammaproteobacteria	Enterobacterales	Enterobacteriaceae	Escherichia	Escherichia coli ED1a	H4028	Crohn's Disease	0.0271024
Crohn's Disease	MTG	frc	C3X762	Proteobacteria	Betaproteobacteria	Burkholderiales	Oxalobacteraceae	Oxalobacter	Oxalobacter formigenes HOxBLS	H4028	Crohn's Disease	0.036467
Crohn's Disease	MTG	frc	O06644	Proteobacteria	Betaproteobacteria	Burkholderiales	Oxalobacteraceae	Oxalobacter	Oxalobacter formigenes	H4028	Crohn's Disease	0.0345497
Crohn's Disease	MTS	frc	A0A377BTA6	Proteobacteria	Gammaproteobacteria	Enterobacterales	Enterobacteriaceae	Escherichia	Escherichia coli	H4028	Crohn's Disease	0.0594882
Crohn's Disease	MTS	frc	C3X762	Proteobacteria	Betaproteobacteria	Burkholderiales	Oxalobacteraceae	Oxalobacter	Oxalobacter formigenes HOxBLS	H4028	Crohn's Disease	0.134638
Crohn's Disease	MTS	frc	O06644	Proteobacteria	Betaproteobacteria	Burkholderiales	Oxalobacteraceae	Oxalobacter	Oxalobacter formigenes	H4028	Crohn's Disease	0.126516
Crohn's Disease	MTG	frc	A0A1F3ZN52	Proteobacteria	Betaproteobacteria	NA	NA	NA	Betaproteobacteria bacterium RIFCSPLOWO2_02_FULL_6	H4028	Crohn's Disease-nonL3	0.0348756
Crohn's Disease	MTG	frc	A0A377BTA6	Proteobacteria	Gammaproteobacteria	Enterobacterales	Enterobacteriaceae	Escherichia	Escherichia coli	H4028	Crohn's Disease-nonL3	0.165105
Crohn's Disease	MTG	frc	A1ADQ1	Proteobacteria	Gammaproteobacteria	Enterobacterales	Enterobacteriaceae	Escherichia	Escherichia coli APEC O1	H4028	Crohn's Disease-nonL3	0.520953
Crohn's Disease	MTG	frc	B7MY33	Proteobacteria	Gammaproteobacteria	Enterobacterales	Enterobacteriaceae	Escherichia	Escherichia coli ED1a	H4028	Crohn's Disease-nonL3	0.0271024
Crohn's Disease	MTG	frc	C3X762	Proteobacteria	Betaproteobacteria	Burkholderiales	Oxalobacteraceae	Oxalobacter	Oxalobacter formigenes HOxBLS	H4028	Crohn's Disease-nonL3	0.036467
Crohn's Disease	MTG	frc	O06644	Proteobacteria	Betaproteobacteria	Burkholderiales	Oxalobacteraceae	Oxalobacter	Oxalobacter formigenes	H4028	Crohn's Disease-nonL3	0.0345497
Crohn's Disease	MTS	frc	A0A377BTA6	Proteobacteria	Gammaproteobacteria	Enterobacterales	Enterobacteriaceae	Escherichia	Escherichia coli	H4028	Crohn's Disease-nonL3	0.0594882
Crohn's Disease	MTS	frc	C3X762	Proteobacteria	Betaproteobacteria	Burkholderiales	Oxalobacteraceae	Oxalobacter	Oxalobacter formigenes HOxBLS	H4028	Crohn's Disease-nonL3	0.134638
Crohn's Disease	MTS	frc	O06644	Proteobacteria	Betaproteobacteria	Burkholderiales	Oxalobacteraceae	Oxalobacter	Oxalobacter formigenes	H4028	Crohn's Disease-nonL3	0.126516
Crohn's Disease	MTG	frc	A0A062XDE4	Firmicutes	Bacilli	Lactobacillales	Lactobacillaceae	Lactobacillus	Lactobacillus animalis	H4030	Crohn's Disease	0.0971924
Crohn's Disease	MTG	frc	A0A072MW66	Actinobacteria	Actinobacteria	Bifidobacteriales	Bifidobacteriaceae	Bifidobacterium	Bifidobacterium pseudocatenulatum IPLA36007	H4030	Crohn's Disease	2.20186
Crohn's Disease	MTG	frc	A0A087ADU5	Actinobacteria	Actinobacteria	Bifidobacteriales	Bifidobacteriaceae	Bifidobacterium	Bifidobacterium choerinum	H4030	Crohn's Disease	1.51975
Crohn's Disease	MTG	frc	A0A087B567	Actinobacteria	Actinobacteria	Bifidobacteriales	Bifidobacteriaceae	Bifidobacterium	Bifidobacterium cuniculi	H4030	Crohn's Disease	0.210184
Crohn's Disease	MTG	frc	A0A087BE81	Actinobacteria	Actinobacteria	Bifidobacteriales	Bifidobacteriaceae	Bifidobacterium	Bifidobacterium magnum	H4030	Crohn's Disease	0.030231
Crohn's Disease	MTG	frc	A0A087QB11	Firmicutes	Bacilli	Lactobacillales	Lactobacillaceae	Lactobacillus	Lactobacillus gasseri SV-16A-US	H4030	Crohn's Disease	0.234748
Crohn's Disease	MTG	frc	A0A0A7I974	Actinobacteria	Actinobacteria	Bifidobacteriales	Bifidobacteriaceae	Bifidobacterium	Bifidobacterium pseudolongum PV8-2	H4030	Crohn's Disease	0.0667538
Crohn's Disease	MTG	frc	A0A0L7BLA3	Actinobacteria	Actinobacteria	Bifidobacteriales	Bifidobacteriaceae	Bifidobacterium	Bifidobacterium animalis subsp. animalis MCC 0483	H4030	Crohn's Disease	0.48042
Crohn's Disease	MTG	frc	A0A0R1HAW1	Firmicutes	Bacilli	Lactobacillales	Lactobacillaceae	Lactobacillus	Lactobacillus amylovorus DSM 20531	H4030	Crohn's Disease	0.0299586
Crohn's Disease	MTG	frc	A0A0R1UH43	Firmicutes	Bacilli	Lactobacillales	Lactobacillaceae	Lactobacillus	Lactobacillus kalixensis DSM 16043	H4030	Crohn's Disease	0.148456
Crohn's Disease	MTG	frc	A0A1U9T5R4	Proteobacteria	Gammaproteobacteria	Enterobacterales	Enterobacteriaceae	Escherichia	Escherichia coli	H4030	Crohn's Disease	0.0914188
Crohn's Disease	MTG	frc	A0A1V8Q5N2	Actinobacteria	Actinobacteria	Bifidobacteriales	Bifidobacteriaceae	Bifidobacterium	Bifidobacterium dentium	H4030	Crohn's Disease	7.49605
Crohn's Disease	MTG	frc	A0A248X7K1	Actinobacteria	Actinobacteria	Bifidobacteriales	Bifidobacteriaceae	Bifidobacterium	Bifidobacterium pseudolongum	H4030	Crohn's Disease	0.111692
Crohn's Disease	MTG	frc	A0A2A2EHW6	Actinobacteria	Actinobacteria	Bifidobacteriales	Bifidobacteriaceae	Bifidobacterium	Bifidobacterium criceti	H4030	Crohn's Disease	0.357892
Crohn's Disease	MTG	frc	A0A377BTA6	Proteobacteria	Gammaproteobacteria	Enterobacterales	Enterobacteriaceae	Escherichia	Escherichia coli	H4030	Crohn's Disease	1.20855
Crohn's Disease	MTG	frc	A1ADQ1	Proteobacteria	Gammaproteobacteria	Enterobacterales	Enterobacteriaceae	Escherichia	Escherichia coli APEC O1	H4030	Crohn's Disease	0.956864
Crohn's Disease	MTG	frc	D2Q6H4	Actinobacteria	Actinobacteria	Bifidobacteriales	Bifidobacteriaceae	Bifidobacterium	Bifidobacterium dentium Bd1	H4030	Crohn's Disease	1.01937
Crohn's Disease	MTG	frc	G1U9U4	Firmicutes	Bacilli	Lactobacillales	Lactobacillaceae	Lactobacillus	Lactobacillus acidophilus	H4030	Crohn's Disease	0.508153
Crohn's Disease	MTG	frc	W1XEM4	Proteobacteria	Gammaproteobacteria	Enterobacterales	Enterobacteriaceae	Escherichia	Escherichia coli DORA_A_5_14_21	H4030	Crohn's Disease	0.0446625
Crohn's Disease	MTS	frc	A0A072MW66	Actinobacteria	Actinobacteria	Bifidobacteriales	Bifidobacteriaceae	Bifidobacterium	Bifidobacterium pseudocatenulatum IPLA36007	H4030	Crohn's Disease	0.859863
Crohn's Disease	MTS	frc	A0A087ADU5	Actinobacteria	Actinobacteria	Bifidobacteriales	Bifidobacteriaceae	Bifidobacterium	Bifidobacterium choerinum	H4030	Crohn's Disease	12.131
Crohn's Disease	MTS	frc	A0A087B567	Actinobacteria	Actinobacteria	Bifidobacteriales	Bifidobacteriaceae	Bifidobacterium	Bifidobacterium cuniculi	H4030	Crohn's Disease	1.4674
Crohn's Disease	MTS	frc	A0A0A7I974	Actinobacteria	Actinobacteria	Bifidobacteriales	Bifidobacteriaceae	Bifidobacterium	Bifidobacterium pseudolongum PV8-2	H4030	Crohn's Disease	0.209156
Crohn's Disease	MTS	frc	A0A0L7BLA3	Actinobacteria	Actinobacteria	Bifidobacteriales	Bifidobacteriaceae	Bifidobacterium	Bifidobacterium animalis subsp. animalis MCC 0483	H4030	Crohn's Disease	7.75623
Crohn's Disease	MTS	frc	A0A1V8Q5N2	Actinobacteria	Actinobacteria	Bifidobacteriales	Bifidobacteriaceae	Bifidobacterium	Bifidobacterium dentium	H4030	Crohn's Disease	1.06497
Crohn's Disease	MTS	frc	A0A248X7K1	Actinobacteria	Actinobacteria	Bifidobacteriales	Bifidobacteriaceae	Bifidobacterium	Bifidobacterium pseudolongum	H4030	Crohn's Disease	1.04578
Crohn's Disease	MTS	frc	A0A2A2EHW6	Actinobacteria	Actinobacteria	Bifidobacteriales	Bifidobacteriaceae	Bifidobacterium	Bifidobacterium criceti	H4030	Crohn's Disease	0.416436
Crohn's Disease	MTS	frc	A0A2Z4W0V4	Firmicutes	Bacilli	Lactobacillales	Lactobacillaceae	Lactobacillus	Lactobacillus murinus	H4030	Crohn's Disease	0.208686
Crohn's Disease	MTS	frc	A0A377BTA6	Proteobacteria	Gammaproteobacteria	Enterobacterales	Enterobacteriaceae	Escherichia	Escherichia coli	H4030	Crohn's Disease	0.137458
Crohn's Disease	MTG	frc	A0A062XDE4	Firmicutes	Bacilli	Lactobacillales	Lactobacillaceae	Lactobacillus	Lactobacillus animalis	H4030	Crohn's Disease-nonL3	0.0971924
Crohn's Disease	MTG	frc	A0A072MW66	Actinobacteria	Actinobacteria	Bifidobacteriales	Bifidobacteriaceae	Bifidobacterium	Bifidobacterium pseudocatenulatum IPLA36007	H4030	Crohn's Disease-nonL3	2.20186
Crohn's Disease	MTG	frc	A0A087ADU5	Actinobacteria	Actinobacteria	Bifidobacteriales	Bifidobacteriaceae	Bifidobacterium	Bifidobacterium choerinum	H4030	Crohn's Disease-nonL3	1.51975
Crohn's Disease	MTG	frc	A0A087B567	Actinobacteria	Actinobacteria	Bifidobacteriales	Bifidobacteriaceae	Bifidobacterium	Bifidobacterium cuniculi	H4030	Crohn's Disease-nonL3	0.210184
Crohn's Disease	MTG	frc	A0A087BE81	Actinobacteria	Actinobacteria	Bifidobacteriales	Bifidobacteriaceae	Bifidobacterium	Bifidobacterium magnum	H4030	Crohn's Disease-nonL3	0.030231
Crohn's Disease	MTG	frc	A0A087QB11	Firmicutes	Bacilli	Lactobacillales	Lactobacillaceae	Lactobacillus	Lactobacillus gasseri SV-16A-US	H4030	Crohn's Disease-nonL3	0.234748
Crohn's Disease	MTG	frc	A0A0A7I974	Actinobacteria	Actinobacteria	Bifidobacteriales	Bifidobacteriaceae	Bifidobacterium	Bifidobacterium pseudolongum PV8-2	H4030	Crohn's Disease-nonL3	0.0667538
Crohn's Disease	MTG	frc	A0A0L7BLA3	Actinobacteria	Actinobacteria	Bifidobacteriales	Bifidobacteriaceae	Bifidobacterium	Bifidobacterium animalis subsp. animalis MCC 0483	H4030	Crohn's Disease-nonL3	0.48042
Crohn's Disease	MTG	frc	A0A0R1HAW1	Firmicutes	Bacilli	Lactobacillales	Lactobacillaceae	Lactobacillus	Lactobacillus amylovorus DSM 20531	H4030	Crohn's Disease-nonL3	0.0299586
Crohn's Disease	MTG	frc	A0A0R1UH43	Firmicutes	Bacilli	Lactobacillales	Lactobacillaceae	Lactobacillus	Lactobacillus kalixensis DSM 16043	H4030	Crohn's Disease-nonL3	0.148456
Crohn's Disease	MTG	frc	A0A1U9T5R4	Proteobacteria	Gammaproteobacteria	Enterobacterales	Enterobacteriaceae	Escherichia	Escherichia coli	H4030	Crohn's Disease-nonL3	0.0914188
Crohn's Disease	MTG	frc	A0A1V8Q5N2	Actinobacteria	Actinobacteria	Bifidobacteriales	Bifidobacteriaceae	Bifidobacterium	Bifidobacterium dentium	H4030	Crohn's Disease-nonL3	7.49605
Crohn's Disease	MTG	frc	A0A248X7K1	Actinobacteria	Actinobacteria	Bifidobacteriales	Bifidobacteriaceae	Bifidobacterium	Bifidobacterium pseudolongum	H4030	Crohn's Disease-nonL3	0.111692
Crohn's Disease	MTG	frc	A0A2A2EHW6	Actinobacteria	Actinobacteria	Bifidobacteriales	Bifidobacteriaceae	Bifidobacterium	Bifidobacterium criceti	H4030	Crohn's Disease-nonL3	0.357892
Crohn's Disease	MTG	frc	A0A377BTA6	Proteobacteria	Gammaproteobacteria	Enterobacterales	Enterobacteriaceae	Escherichia	Escherichia coli	H4030	Crohn's Disease-nonL3	1.20855
Crohn's Disease	MTG	frc	A1ADQ1	Proteobacteria	Gammaproteobacteria	Enterobacterales	Enterobacteriaceae	Escherichia	Escherichia coli APEC O1	H4030	Crohn's Disease-nonL3	0.956864
Crohn's Disease	MTG	frc	D2Q6H4	Actinobacteria	Actinobacteria	Bifidobacteriales	Bifidobacteriaceae	Bifidobacterium	Bifidobacterium dentium Bd1	H4030	Crohn's Disease-nonL3	1.01937
Crohn's Disease	MTG	frc	G1U9U4	Firmicutes	Bacilli	Lactobacillales	Lactobacillaceae	Lactobacillus	Lactobacillus acidophilus	H4030	Crohn's Disease-nonL3	0.508153
Crohn's Disease	MTG	frc	W1XEM4	Proteobacteria	Gammaproteobacteria	Enterobacterales	Enterobacteriaceae	Escherichia	Escherichia coli DORA_A_5_14_21	H4030	Crohn's Disease-nonL3	0.0446625
Crohn's Disease	MTS	frc	A0A072MW66	Actinobacteria	Actinobacteria	Bifidobacteriales	Bifidobacteriaceae	Bifidobacterium	Bifidobacterium pseudocatenulatum IPLA36007	H4030	Crohn's Disease-nonL3	0.859863
Crohn's Disease	MTS	frc	A0A087ADU5	Actinobacteria	Actinobacteria	Bifidobacteriales	Bifidobacteriaceae	Bifidobacterium	Bifidobacterium choerinum	H4030	Crohn's Disease-nonL3	12.131
Crohn's Disease	MTS	frc	A0A087B567	Actinobacteria	Actinobacteria	Bifidobacteriales	Bifidobacteriaceae	Bifidobacterium	Bifidobacterium cuniculi	H4030	Crohn's Disease-nonL3	1.4674
Crohn's Disease	MTS	frc	A0A0A7I974	Actinobacteria	Actinobacteria	Bifidobacteriales	Bifidobacteriaceae	Bifidobacterium	Bifidobacterium pseudolongum PV8-2	H4030	Crohn's Disease-nonL3	0.209156
Crohn's Disease	MTS	frc	A0A0L7BLA3	Actinobacteria	Actinobacteria	Bifidobacteriales	Bifidobacteriaceae	Bifidobacterium	Bifidobacterium animalis subsp. animalis MCC 0483	H4030	Crohn's Disease-nonL3	7.75623
Crohn's Disease	MTS	frc	A0A1V8Q5N2	Actinobacteria	Actinobacteria	Bifidobacteriales	Bifidobacteriaceae	Bifidobacterium	Bifidobacterium dentium	H4030	Crohn's Disease-nonL3	1.06497
Crohn's Disease	MTS	frc	A0A248X7K1	Actinobacteria	Actinobacteria	Bifidobacteriales	Bifidobacteriaceae	Bifidobacterium	Bifidobacterium pseudolongum	H4030	Crohn's Disease-nonL3	1.04578
Crohn's Disease	MTS	frc	A0A2A2EHW6	Actinobacteria	Actinobacteria	Bifidobacteriales	Bifidobacteriaceae	Bifidobacterium	Bifidobacterium criceti	H4030	Crohn's Disease-nonL3	0.416436
Crohn's Disease	MTS	frc	A0A2Z4W0V4	Firmicutes	Bacilli	Lactobacillales	Lactobacillaceae	Lactobacillus	Lactobacillus murinus	H4030	Crohn's Disease-nonL3	0.208686
Crohn's Disease	MTS	frc	A0A377BTA6	Proteobacteria	Gammaproteobacteria	Enterobacterales	Enterobacteriaceae	Escherichia	Escherichia coli	H4030	Crohn's Disease-nonL3	0.137458
Crohn's Disease	MTG	frc	A0A377BTA6	Proteobacteria	Gammaproteobacteria	Enterobacterales	Enterobacteriaceae	Escherichia	Escherichia coli	H4031	Crohn's Disease	0.185735
Crohn's Disease	MTG	frc	A1ADQ1	Proteobacteria	Gammaproteobacteria	Enterobacterales	Enterobacteriaceae	Escherichia	Escherichia coli APEC O1	H4031	Crohn's Disease	0.299704
Crohn's Disease	MTG	frc	A0A377BTA6	Proteobacteria	Gammaproteobacteria	Enterobacterales	Enterobacteriaceae	Escherichia	Escherichia coli	H4031	Crohn's Disease-nonL3	0.185735
Crohn's Disease	MTG	frc	A1ADQ1	Proteobacteria	Gammaproteobacteria	Enterobacterales	Enterobacteriaceae	Escherichia	Escherichia coli APEC O1	H4031	Crohn's Disease-nonL3	0.299704
Crohn's Disease	MTG	frc	A0A072MW66	Actinobacteria	Actinobacteria	Bifidobacteriales	Bifidobacteriaceae	Bifidobacterium	Bifidobacterium pseudocatenulatum IPLA36007	H4032	Crohn's Disease	0.327958
Crohn's Disease	MTG	frc	A0A174BHB6	Actinobacteria	Actinobacteria	Bifidobacteriales	Bifidobacteriaceae	Bifidobacterium	Bifidobacterium pseudocatenulatum	H4032	Crohn's Disease	0.173693
Crohn's Disease	MTG	frc	A0A1Q6EPI6	Actinobacteria	Actinobacteria	Bifidobacteriales	Bifidobacteriaceae	Bifidobacterium	Bifidobacterium sp. 56_9_plus	H4032	Crohn's Disease	0.0382271
Crohn's Disease	MTG	frc	A0A072MW66	Actinobacteria	Actinobacteria	Bifidobacteriales	Bifidobacteriaceae	Bifidobacterium	Bifidobacterium pseudocatenulatum IPLA36007	H4032	Crohn's Disease-L3	0.327958
Crohn's Disease	MTG	frc	A0A174BHB6	Actinobacteria	Actinobacteria	Bifidobacteriales	Bifidobacteriaceae	Bifidobacterium	Bifidobacterium pseudocatenulatum	H4032	Crohn's Disease-L3	0.173693
Crohn's Disease	MTG	frc	A0A1Q6EPI6	Actinobacteria	Actinobacteria	Bifidobacteriales	Bifidobacteriaceae	Bifidobacterium	Bifidobacterium sp. 56_9_plus	H4032	Crohn's Disease-L3	0.0382271
Crohn's Disease	MTG	frc	A0A072MW66	Actinobacteria	Actinobacteria	Bifidobacteriales	Bifidobacteriaceae	Bifidobacterium	Bifidobacterium pseudocatenulatum IPLA36007	H4038	Crohn's Disease	0.305779
Crohn's Disease	MTG	frc	A0A174BHB6	Actinobacteria	Actinobacteria	Bifidobacteriales	Bifidobacteriaceae	Bifidobacterium	Bifidobacterium pseudocatenulatum	H4038	Crohn's Disease	0.0613301
Crohn's Disease	MTG	frc	A0A377BTA6	Proteobacteria	Gammaproteobacteria	Enterobacterales	Enterobacteriaceae	Escherichia	Escherichia coli	H4038	Crohn's Disease	0.207315
Crohn's Disease	MTG	frc	A1ADQ1	Proteobacteria	Gammaproteobacteria	Enterobacterales	Enterobacteriaceae	Escherichia	Escherichia coli APEC O1	H4038	Crohn's Disease	1.26887
Crohn's Disease	MTG	frc	B5YYX4	Proteobacteria	Gammaproteobacteria	Enterobacterales	Enterobacteriaceae	Escherichia	Escherichia coli O157:H7 str. EC4115	H4038	Crohn's Disease	0.088526
Crohn's Disease	MTS	frc	A0A377BTA6	Proteobacteria	Gammaproteobacteria	Enterobacterales	Enterobacteriaceae	Escherichia	Escherichia coli	H4038	Crohn's Disease	0.0758714
Crohn's Disease	MTG	frc	A0A072MW66	Actinobacteria	Actinobacteria	Bifidobacteriales	Bifidobacteriaceae	Bifidobacterium	Bifidobacterium pseudocatenulatum IPLA36007	H4038	Crohn's Disease-L3	0.305779
Crohn's Disease	MTG	frc	A0A174BHB6	Actinobacteria	Actinobacteria	Bifidobacteriales	Bifidobacteriaceae	Bifidobacterium	Bifidobacterium pseudocatenulatum	H4038	Crohn's Disease-L3	0.0613301
Crohn's Disease	MTG	frc	A0A377BTA6	Proteobacteria	Gammaproteobacteria	Enterobacterales	Enterobacteriaceae	Escherichia	Escherichia coli	H4038	Crohn's Disease-L3	0.207315
Crohn's Disease	MTG	frc	A1ADQ1	Proteobacteria	Gammaproteobacteria	Enterobacterales	Enterobacteriaceae	Escherichia	Escherichia coli APEC O1	H4038	Crohn's Disease-L3	1.26887
Crohn's Disease	MTG	frc	B5YYX4	Proteobacteria	Gammaproteobacteria	Enterobacterales	Enterobacteriaceae	Escherichia	Escherichia coli O157:H7 str. EC4115	H4038	Crohn's Disease-L3	0.088526
Crohn's Disease	MTS	frc	A0A377BTA6	Proteobacteria	Gammaproteobacteria	Enterobacterales	Enterobacteriaceae	Escherichia	Escherichia coli	H4038	Crohn's Disease-L3	0.0758714
Crohn's Disease	MTG	frc	A0A071LN49	Proteobacteria	Gammaproteobacteria	Enterobacterales	Enterobacteriaceae	Mangrovibacter	Mangrovibacter sp. MFB070	H4039	Crohn's Disease	0.026797
Crohn's Disease	MTG	frc	A0A087ADU5	Actinobacteria	Actinobacteria	Bifidobacteriales	Bifidobacteriaceae	Bifidobacterium	Bifidobacterium choerinum	H4039	Crohn's Disease	0.143338
Crohn's Disease	MTG	frc	A0A087QB11	Firmicutes	Bacilli	Lactobacillales	Lactobacillaceae	Lactobacillus	Lactobacillus gasseri SV-16A-US	H4039	Crohn's Disease	0.0640393
Crohn's Disease	MTG	frc	A0A0L7BLA3	Actinobacteria	Actinobacteria	Bifidobacteriales	Bifidobacteriaceae	Bifidobacterium	Bifidobacterium animalis subsp. animalis MCC 0483	H4039	Crohn's Disease	0.0269051
Crohn's Disease	MTG	frc	A0A1U9T5R4	Proteobacteria	Gammaproteobacteria	Enterobacterales	Enterobacteriaceae	Escherichia	Escherichia coli	H4039	Crohn's Disease	0.136384
Crohn's Disease	MTG	frc	A0A248X7K1	Actinobacteria	Actinobacteria	Bifidobacteriales	Bifidobacteriaceae	Bifidobacterium	Bifidobacterium pseudolongum	H4039	Crohn's Disease	0.106761
Crohn's Disease	MTG	frc	A0A377BTA6	Proteobacteria	Gammaproteobacteria	Enterobacterales	Enterobacteriaceae	Escherichia	Escherichia coli	H4039	Crohn's Disease	0.903998
Crohn's Disease	MTG	frc	A1ADQ1	Proteobacteria	Gammaproteobacteria	Enterobacterales	Enterobacteriaceae	Escherichia	Escherichia coli APEC O1	H4039	Crohn's Disease	1.32768
Crohn's Disease	MTG	frc	B5YYX4	Proteobacteria	Gammaproteobacteria	Enterobacterales	Enterobacteriaceae	Escherichia	Escherichia coli O157:H7 str. EC4115	H4039	Crohn's Disease	0.0713557
Crohn's Disease	MTG	frc	D1NS91	Actinobacteria	Actinobacteria	Bifidobacteriales	Bifidobacteriaceae	Bifidobacterium	Bifidobacterium gallicum DSM 20093 = LMG 11596	H4039	Crohn's Disease	0.0358986
Crohn's Disease	MTS	frc	A0A377BTA6	Proteobacteria	Gammaproteobacteria	Enterobacterales	Enterobacteriaceae	Escherichia	Escherichia coli	H4039	Crohn's Disease	0.0631098
Crohn's Disease	MTS	frc	A1ADQ1	Proteobacteria	Gammaproteobacteria	Enterobacterales	Enterobacteriaceae	Escherichia	Escherichia coli APEC O1	H4039	Crohn's Disease	0.487765
Crohn's Disease	MTG	frc	A0A071LN49	Proteobacteria	Gammaproteobacteria	Enterobacterales	Enterobacteriaceae	Mangrovibacter	Mangrovibacter sp. MFB070	H4039	Crohn's Disease-L3	0.026797
Crohn's Disease	MTG	frc	A0A087ADU5	Actinobacteria	Actinobacteria	Bifidobacteriales	Bifidobacteriaceae	Bifidobacterium	Bifidobacterium choerinum	H4039	Crohn's Disease-L3	0.143338
Crohn's Disease	MTG	frc	A0A087QB11	Firmicutes	Bacilli	Lactobacillales	Lactobacillaceae	Lactobacillus	Lactobacillus gasseri SV-16A-US	H4039	Crohn's Disease-L3	0.0640393
Crohn's Disease	MTG	frc	A0A0L7BLA3	Actinobacteria	Actinobacteria	Bifidobacteriales	Bifidobacteriaceae	Bifidobacterium	Bifidobacterium animalis subsp. animalis MCC 0483	H4039	Crohn's Disease-L3	0.0269051
Crohn's Disease	MTG	frc	A0A1U9T5R4	Proteobacteria	Gammaproteobacteria	Enterobacterales	Enterobacteriaceae	Escherichia	Escherichia coli	H4039	Crohn's Disease-L3	0.136384
Crohn's Disease	MTG	frc	A0A248X7K1	Actinobacteria	Actinobacteria	Bifidobacteriales	Bifidobacteriaceae	Bifidobacterium	Bifidobacterium pseudolongum	H4039	Crohn's Disease-L3	0.106761
Crohn's Disease	MTG	frc	A0A377BTA6	Proteobacteria	Gammaproteobacteria	Enterobacterales	Enterobacteriaceae	Escherichia	Escherichia coli	H4039	Crohn's Disease-L3	0.903998
Crohn's Disease	MTG	frc	A1ADQ1	Proteobacteria	Gammaproteobacteria	Enterobacterales	Enterobacteriaceae	Escherichia	Escherichia coli APEC O1	H4039	Crohn's Disease-L3	1.32768
Crohn's Disease	MTG	frc	B5YYX4	Proteobacteria	Gammaproteobacteria	Enterobacterales	Enterobacteriaceae	Escherichia	Escherichia coli O157:H7 str. EC4115	H4039	Crohn's Disease-L3	0.0713557
Crohn's Disease	MTG	frc	D1NS91	Actinobacteria	Actinobacteria	Bifidobacteriales	Bifidobacteriaceae	Bifidobacterium	Bifidobacterium gallicum DSM 20093 = LMG 11596	H4039	Crohn's Disease-L3	0.0358986
Crohn's Disease	MTS	frc	A0A377BTA6	Proteobacteria	Gammaproteobacteria	Enterobacterales	Enterobacteriaceae	Escherichia	Escherichia coli	H4039	Crohn's Disease-L3	0.0631098
Crohn's Disease	MTS	frc	A1ADQ1	Proteobacteria	Gammaproteobacteria	Enterobacterales	Enterobacteriaceae	Escherichia	Escherichia coli APEC O1	H4039	Crohn's Disease-L3	0.487765
Crohn's Disease	MTG	frc	A0A072MW66	Actinobacteria	Actinobacteria	Bifidobacteriales	Bifidobacteriaceae	Bifidobacterium	Bifidobacterium pseudocatenulatum IPLA36007	H4043	Crohn's Disease	0.128968
Crohn's Disease	MTG	frc	A0A377BTA6	Proteobacteria	Gammaproteobacteria	Enterobacterales	Enterobacteriaceae	Escherichia	Escherichia coli	H4043	Crohn's Disease	0.0604135
Crohn's Disease	MTG	frc	A1ADQ1	Proteobacteria	Gammaproteobacteria	Enterobacterales	Enterobacteriaceae	Escherichia	Escherichia coli APEC O1	H4043	Crohn's Disease	0.0986466
Crohn's Disease	MTG	frc	A0A072MW66	Actinobacteria	Actinobacteria	Bifidobacteriales	Bifidobacteriaceae	Bifidobacterium	Bifidobacterium pseudocatenulatum IPLA36007	H4043	Crohn's Disease-L3	0.128968
Crohn's Disease	MTG	frc	A0A377BTA6	Proteobacteria	Gammaproteobacteria	Enterobacterales	Enterobacteriaceae	Escherichia	Escherichia coli	H4043	Crohn's Disease-L3	0.0604135
Crohn's Disease	MTG	frc	A1ADQ1	Proteobacteria	Gammaproteobacteria	Enterobacterales	Enterobacteriaceae	Escherichia	Escherichia coli APEC O1	H4043	Crohn's Disease-L3	0.0986466
Crohn's Disease	MTG	frc	A0A016XI66	Proteobacteria	Betaproteobacteria	Burkholderiales	Comamonadaceae	Hylemonella	Hylemonella gracilis str. Niagara R	M2008	Crohn's Disease	0.106632
Crohn's Disease	MTG	frc	A0A071LN49	Proteobacteria	Gammaproteobacteria	Enterobacterales	Enterobacteriaceae	Mangrovibacter	Mangrovibacter sp. MFB070	M2008	Crohn's Disease	0.0528143
Crohn's Disease	MTG	frc	A0A1A2GAS7	Actinobacteria	Actinobacteria	Corynebacteriales	Mycobacteriaceae	Mycobacterium	Mycobacterium sp. 852002-51057_SCH5723018	M2008	Crohn's Disease	0.0236351
Crohn's Disease	MTG	frc	A0A254Q3M7	Proteobacteria	Betaproteobacteria	Burkholderiales	Burkholderiaceae	Polynucleobacter	Polynucleobacter aenigmaticus	M2008	Crohn's Disease	0.0417668
Crohn's Disease	MTG	frc	A0A2X5G0L0	Proteobacteria	Gammaproteobacteria	Enterobacterales	Enterobacteriaceae	Escherichia	Escherichia coli	M2008	Crohn's Disease	0.216809
Crohn's Disease	MTG	frc	A0A377BTA6	Proteobacteria	Gammaproteobacteria	Enterobacterales	Enterobacteriaceae	Escherichia	Escherichia coli	M2008	Crohn's Disease	0.0854808
Crohn's Disease	MTG	frc	A1ADQ1	Proteobacteria	Gammaproteobacteria	Enterobacterales	Enterobacteriaceae	Escherichia	Escherichia coli APEC O1	M2008	Crohn's Disease	0.646276
Crohn's Disease	MTG	frc	B5YYX4	Proteobacteria	Gammaproteobacteria	Enterobacterales	Enterobacteriaceae	Escherichia	Escherichia coli O157:H7 str. EC4115	M2008	Crohn's Disease	0.137022
Crohn's Disease	MTG	frc	Q8FFE8	Proteobacteria	Gammaproteobacteria	Enterobacterales	Enterobacteriaceae	Escherichia	Escherichia coli CFT073	M2008	Crohn's Disease	0.178315
Crohn's Disease	MTG	frc	R9KTQ7	Actinobacteria	Coriobacteriia	Eggerthellales	Eggerthellaceae	Enterorhabdus	Enterorhabdus caecimuris B7	M2008	Crohn's Disease	0.0193718
Crohn's Disease	MTS	frc	A0A377BTA6	Proteobacteria	Gammaproteobacteria	Enterobacterales	Enterobacteriaceae	Escherichia	Escherichia coli	M2008	Crohn's Disease	0.0791724
Crohn's Disease	MTS	frc	A1ADQ1	Proteobacteria	Gammaproteobacteria	Enterobacterales	Enterobacteriaceae	Escherichia	Escherichia coli APEC O1	M2008	Crohn's Disease	0.0324589
Crohn's Disease	MTS	frc	C3X762	Proteobacteria	Betaproteobacteria	Burkholderiales	Oxalobacteraceae	Oxalobacter	Oxalobacter formigenes HOxBLS	M2008	Crohn's Disease	0.0435625
Crohn's Disease	MTG	frc	A0A016XI66	Proteobacteria	Betaproteobacteria	Burkholderiales	Comamonadaceae	Hylemonella	Hylemonella gracilis str. Niagara R	M2008	Crohn's Disease-nonL3	0.106632
Crohn's Disease	MTG	frc	A0A071LN49	Proteobacteria	Gammaproteobacteria	Enterobacterales	Enterobacteriaceae	Mangrovibacter	Mangrovibacter sp. MFB070	M2008	Crohn's Disease-nonL3	0.0528143
Crohn's Disease	MTG	frc	A0A1A2GAS7	Actinobacteria	Actinobacteria	Corynebacteriales	Mycobacteriaceae	Mycobacterium	Mycobacterium sp. 852002-51057_SCH5723018	M2008	Crohn's Disease-nonL3	0.0236351
Crohn's Disease	MTG	frc	A0A254Q3M7	Proteobacteria	Betaproteobacteria	Burkholderiales	Burkholderiaceae	Polynucleobacter	Polynucleobacter aenigmaticus	M2008	Crohn's Disease-nonL3	0.0417668
Crohn's Disease	MTG	frc	A0A2X5G0L0	Proteobacteria	Gammaproteobacteria	Enterobacterales	Enterobacteriaceae	Escherichia	Escherichia coli	M2008	Crohn's Disease-nonL3	0.216809
Crohn's Disease	MTG	frc	A0A377BTA6	Proteobacteria	Gammaproteobacteria	Enterobacterales	Enterobacteriaceae	Escherichia	Escherichia coli	M2008	Crohn's Disease-nonL3	0.0854808
Crohn's Disease	MTG	frc	A1ADQ1	Proteobacteria	Gammaproteobacteria	Enterobacterales	Enterobacteriaceae	Escherichia	Escherichia coli APEC O1	M2008	Crohn's Disease-nonL3	0.646276
Crohn's Disease	MTG	frc	B5YYX4	Proteobacteria	Gammaproteobacteria	Enterobacterales	Enterobacteriaceae	Escherichia	Escherichia coli O157:H7 str. EC4115	M2008	Crohn's Disease-nonL3	0.137022
Crohn's Disease	MTG	frc	Q8FFE8	Proteobacteria	Gammaproteobacteria	Enterobacterales	Enterobacteriaceae	Escherichia	Escherichia coli CFT073	M2008	Crohn's Disease-nonL3	0.178315
Crohn's Disease	MTG	frc	R9KTQ7	Actinobacteria	Coriobacteriia	Eggerthellales	Eggerthellaceae	Enterorhabdus	Enterorhabdus caecimuris B7	M2008	Crohn's Disease-nonL3	0.0193718
Crohn's Disease	MTS	frc	A0A377BTA6	Proteobacteria	Gammaproteobacteria	Enterobacterales	Enterobacteriaceae	Escherichia	Escherichia coli	M2008	Crohn's Disease-nonL3	0.0791724
Crohn's Disease	MTS	frc	A1ADQ1	Proteobacteria	Gammaproteobacteria	Enterobacterales	Enterobacteriaceae	Escherichia	Escherichia coli APEC O1	M2008	Crohn's Disease-nonL3	0.0324589
Crohn's Disease	MTS	frc	C3X762	Proteobacteria	Betaproteobacteria	Burkholderiales	Oxalobacteraceae	Oxalobacter	Oxalobacter formigenes HOxBLS	M2008	Crohn's Disease-nonL3	0.0435625
Crohn's Disease	MTG	frc	A0A016XI66	Proteobacteria	Betaproteobacteria	Burkholderiales	Comamonadaceae	Hylemonella	Hylemonella gracilis str. Niagara R	M2010	Crohn's Disease	0.0218121
Crohn's Disease	MTG	frc	A0A0K4YN22	Proteobacteria	Gammaproteobacteria	Enterobacterales	Enterobacteriaceae	Escherichia	Escherichia coli	M2010	Crohn's Disease	0.0220743
Crohn's Disease	MTG	frc	A0A209A2M1	Proteobacteria	Gammaproteobacteria	Enterobacterales	Yersiniaceae	Yersinia	Yersinia frederiksenii	M2010	Crohn's Disease	0.0223429
Crohn's Disease	MTG	frc	A0A2V7C257	Candidatus Rokubacteria	NA	NA	NA	NA	Candidatus Rokubacteria bacterium	M2010	Crohn's Disease	0.0216578
Crohn's Disease	MTG	frc	A0A2X5G0L0	Proteobacteria	Gammaproteobacteria	Enterobacterales	Enterobacteriaceae	Escherichia	Escherichia coli	M2010	Crohn's Disease	0.0241656
Crohn's Disease	MTG	frc	A0A377BTA6	Proteobacteria	Gammaproteobacteria	Enterobacterales	Enterobacteriaceae	Escherichia	Escherichia coli	M2010	Crohn's Disease	3.17992
Crohn's Disease	MTG	frc	A1ADQ1	Proteobacteria	Gammaproteobacteria	Enterobacterales	Enterobacteriaceae	Escherichia	Escherichia coli APEC O1	M2010	Crohn's Disease	18.4056
Crohn's Disease	MTG	frc	B5YYX4	Proteobacteria	Gammaproteobacteria	Enterobacterales	Enterobacteriaceae	Escherichia	Escherichia coli O157:H7 str. EC4115	M2010	Crohn's Disease	1.67184
Crohn's Disease	MTG	frc	A0A016XI66	Proteobacteria	Betaproteobacteria	Burkholderiales	Comamonadaceae	Hylemonella	Hylemonella gracilis str. Niagara R	M2010	Crohn's Disease-nonL3	0.0218121
Crohn's Disease	MTG	frc	A0A0K4YN22	Proteobacteria	Gammaproteobacteria	Enterobacterales	Enterobacteriaceae	Escherichia	Escherichia coli	M2010	Crohn's Disease-nonL3	0.0220743
Crohn's Disease	MTG	frc	A0A209A2M1	Proteobacteria	Gammaproteobacteria	Enterobacterales	Yersiniaceae	Yersinia	Yersinia frederiksenii	M2010	Crohn's Disease-nonL3	0.0223429
Crohn's Disease	MTG	frc	A0A2V7C257	Candidatus Rokubacteria	NA	NA	NA	NA	Candidatus Rokubacteria bacterium	M2010	Crohn's Disease-nonL3	0.0216578
Crohn's Disease	MTG	frc	A0A2X5G0L0	Proteobacteria	Gammaproteobacteria	Enterobacterales	Enterobacteriaceae	Escherichia	Escherichia coli	M2010	Crohn's Disease-nonL3	0.0241656
Crohn's Disease	MTG	frc	A0A377BTA6	Proteobacteria	Gammaproteobacteria	Enterobacterales	Enterobacteriaceae	Escherichia	Escherichia coli	M2010	Crohn's Disease-nonL3	3.17992
Crohn's Disease	MTG	frc	A1ADQ1	Proteobacteria	Gammaproteobacteria	Enterobacterales	Enterobacteriaceae	Escherichia	Escherichia coli APEC O1	M2010	Crohn's Disease-nonL3	18.4056
Crohn's Disease	MTG	frc	B5YYX4	Proteobacteria	Gammaproteobacteria	Enterobacterales	Enterobacteriaceae	Escherichia	Escherichia coli O157:H7 str. EC4115	M2010	Crohn's Disease-nonL3	1.67184
Crohn's Disease	MTG	frc	A0A1C5C340	Actinobacteria	Actinobacteria	Streptomycetales	Streptomycetaceae	Streptomyces	Streptomyces sp. MnatMP-M17	M2014	Crohn's Disease	0.0225485
Crohn's Disease	MTG	frc	A0A2I6E5X4	Proteobacteria	Gammaproteobacteria	Enterobacterales	Enterobacteriaceae	Enterobacter	Enterobacter cancerogenus	M2014	Crohn's Disease	0.0226569
Crohn's Disease	MTG	frc	A0A377BTA6	Proteobacteria	Gammaproteobacteria	Enterobacterales	Enterobacteriaceae	Escherichia	Escherichia coli	M2014	Crohn's Disease	0.367542
Crohn's Disease	MTG	frc	A1ADQ1	Proteobacteria	Gammaproteobacteria	Enterobacterales	Enterobacteriaceae	Escherichia	Escherichia coli APEC O1	M2014	Crohn's Disease	0.537486
Crohn's Disease	MTG	frc	C3X762	Proteobacteria	Betaproteobacteria	Burkholderiales	Oxalobacteraceae	Oxalobacter	Oxalobacter formigenes HOxBLS	M2014	Crohn's Disease	0.024056
Crohn's Disease	MTS	frc	A0A377BTA6	Proteobacteria	Gammaproteobacteria	Enterobacterales	Enterobacteriaceae	Escherichia	Escherichia coli	M2014	Crohn's Disease	0.482147
Crohn's Disease	MTS	frc	G1U9U4	Firmicutes	Bacilli	Lactobacillales	Lactobacillaceae	Lactobacillus	Lactobacillus acidophilus	M2014	Crohn's Disease	0.68096
Crohn's Disease	MTG	frc	A0A1C5C340	Actinobacteria	Actinobacteria	Streptomycetales	Streptomycetaceae	Streptomyces	Streptomyces sp. MnatMP-M17	M2014	Crohn's Disease-nonL3	0.0225485
Crohn's Disease	MTG	frc	A0A2I6E5X4	Proteobacteria	Gammaproteobacteria	Enterobacterales	Enterobacteriaceae	Enterobacter	Enterobacter cancerogenus	M2014	Crohn's Disease-nonL3	0.0226569
Crohn's Disease	MTG	frc	A0A377BTA6	Proteobacteria	Gammaproteobacteria	Enterobacterales	Enterobacteriaceae	Escherichia	Escherichia coli	M2014	Crohn's Disease-nonL3	0.367542
Crohn's Disease	MTG	frc	A1ADQ1	Proteobacteria	Gammaproteobacteria	Enterobacterales	Enterobacteriaceae	Escherichia	Escherichia coli APEC O1	M2014	Crohn's Disease-nonL3	0.537486
Crohn's Disease	MTG	frc	C3X762	Proteobacteria	Betaproteobacteria	Burkholderiales	Oxalobacteraceae	Oxalobacter	Oxalobacter formigenes HOxBLS	M2014	Crohn's Disease-nonL3	0.024056
Crohn's Disease	MTS	frc	A0A377BTA6	Proteobacteria	Gammaproteobacteria	Enterobacterales	Enterobacteriaceae	Escherichia	Escherichia coli	M2014	Crohn's Disease-nonL3	0.482147
Crohn's Disease	MTS	frc	G1U9U4	Firmicutes	Bacilli	Lactobacillales	Lactobacillaceae	Lactobacillus	Lactobacillus acidophilus	M2014	Crohn's Disease-nonL3	0.68096
Crohn's Disease	MTG	frc	A0A0L7BLA3	Actinobacteria	Actinobacteria	Bifidobacteriales	Bifidobacteriaceae	Bifidobacterium	Bifidobacterium animalis subsp. animalis MCC 0483	M2021	Crohn's Disease	0.0185939
Crohn's Disease	MTG	frc	A0A1Q6U8Z5	Proteobacteria	Alphaproteobacteria	Rhodospirillales	Rhodospirillaceae	Azospirillum	Azospirillum sp. 51_20	M2021	Crohn's Disease	3.37085
Crohn's Disease	MTG	frc	A0A2W5RAA1	Proteobacteria	Alphaproteobacteria	Rhizobiales	Xanthobacteraceae	Starkeya	Starkeya novella	M2021	Crohn's Disease	0.0397178
Crohn's Disease	MTG	frc	A0A355Z7A2	Bacteroidetes	Bacteroidia	Bacteroidales	Porphyromonadaceae	NA	Porphyromonadaceae bacterium	M2021	Crohn's Disease	0.0190673
Crohn's Disease	MTG	frc	A0A377BTA6	Proteobacteria	Gammaproteobacteria	Enterobacterales	Enterobacteriaceae	Escherichia	Escherichia coli	M2021	Crohn's Disease	0.0946133
Crohn's Disease	MTG	frc	A1ADQ1	Proteobacteria	Gammaproteobacteria	Enterobacterales	Enterobacteriaceae	Escherichia	Escherichia coli APEC O1	M2021	Crohn's Disease	0.0202886
Crohn's Disease	MTG	frc	C3X762	Proteobacteria	Betaproteobacteria	Burkholderiales	Oxalobacteraceae	Oxalobacter	Oxalobacter formigenes HOxBLS	M2021	Crohn's Disease	0.126012
Crohn's Disease	MTG	frc	O06644	Proteobacteria	Betaproteobacteria	Burkholderiales	Oxalobacteraceae	Oxalobacter	Oxalobacter formigenes	M2021	Crohn's Disease	0.0523147
Crohn's Disease	MTS	frc	A0A1Q6U8Z5	Proteobacteria	Alphaproteobacteria	Rhodospirillales	Rhodospirillaceae	Azospirillum	Azospirillum sp. 51_20	M2021	Crohn's Disease	0.191341
Crohn's Disease	MTS	frc	C3X2D4	Proteobacteria	Betaproteobacteria	Burkholderiales	Oxalobacteraceae	Oxalobacter	Oxalobacter formigenes HOxBLS	M2021	Crohn's Disease	0.273826
Crohn's Disease	MTS	frc	C3X762	Proteobacteria	Betaproteobacteria	Burkholderiales	Oxalobacteraceae	Oxalobacter	Oxalobacter formigenes HOxBLS	M2021	Crohn's Disease	1.60822
Crohn's Disease	MTS	frc	O06644	Proteobacteria	Betaproteobacteria	Burkholderiales	Oxalobacteraceae	Oxalobacter	Oxalobacter formigenes	M2021	Crohn's Disease	1.50068
Crohn's Disease	MTG	frc	A0A0L7BLA3	Actinobacteria	Actinobacteria	Bifidobacteriales	Bifidobacteriaceae	Bifidobacterium	Bifidobacterium animalis subsp. animalis MCC 0483	M2021	Crohn's Disease-nonL3	0.0185939
Crohn's Disease	MTG	frc	A0A1Q6U8Z5	Proteobacteria	Alphaproteobacteria	Rhodospirillales	Rhodospirillaceae	Azospirillum	Azospirillum sp. 51_20	M2021	Crohn's Disease-nonL3	3.37085
Crohn's Disease	MTG	frc	A0A2W5RAA1	Proteobacteria	Alphaproteobacteria	Rhizobiales	Xanthobacteraceae	Starkeya	Starkeya novella	M2021	Crohn's Disease-nonL3	0.0397178
Crohn's Disease	MTG	frc	A0A355Z7A2	Bacteroidetes	Bacteroidia	Bacteroidales	Porphyromonadaceae	NA	Porphyromonadaceae bacterium	M2021	Crohn's Disease-nonL3	0.0190673
Crohn's Disease	MTG	frc	A0A377BTA6	Proteobacteria	Gammaproteobacteria	Enterobacterales	Enterobacteriaceae	Escherichia	Escherichia coli	M2021	Crohn's Disease-nonL3	0.0946133
Crohn's Disease	MTG	frc	A1ADQ1	Proteobacteria	Gammaproteobacteria	Enterobacterales	Enterobacteriaceae	Escherichia	Escherichia coli APEC O1	M2021	Crohn's Disease-nonL3	0.0202886
Crohn's Disease	MTG	frc	C3X762	Proteobacteria	Betaproteobacteria	Burkholderiales	Oxalobacteraceae	Oxalobacter	Oxalobacter formigenes HOxBLS	M2021	Crohn's Disease-nonL3	0.126012
Crohn's Disease	MTG	frc	O06644	Proteobacteria	Betaproteobacteria	Burkholderiales	Oxalobacteraceae	Oxalobacter	Oxalobacter formigenes	M2021	Crohn's Disease-nonL3	0.0523147
Crohn's Disease	MTS	frc	A0A1Q6U8Z5	Proteobacteria	Alphaproteobacteria	Rhodospirillales	Rhodospirillaceae	Azospirillum	Azospirillum sp. 51_20	M2021	Crohn's Disease-nonL3	0.191341
Crohn's Disease	MTS	frc	C3X2D4	Proteobacteria	Betaproteobacteria	Burkholderiales	Oxalobacteraceae	Oxalobacter	Oxalobacter formigenes HOxBLS	M2021	Crohn's Disease-nonL3	0.273826
Crohn's Disease	MTS	frc	C3X762	Proteobacteria	Betaproteobacteria	Burkholderiales	Oxalobacteraceae	Oxalobacter	Oxalobacter formigenes HOxBLS	M2021	Crohn's Disease-nonL3	1.60822
Crohn's Disease	MTS	frc	O06644	Proteobacteria	Betaproteobacteria	Burkholderiales	Oxalobacteraceae	Oxalobacter	Oxalobacter formigenes	M2021	Crohn's Disease-nonL3	1.50068
Crohn's Disease	MTG	frc	A0A1F4IAS5	Proteobacteria	Betaproteobacteria	Burkholderiales	NA	NA	Burkholderiales bacterium RIFCSPHIGHO2_12_FULL_61_	M2025	Crohn's Disease	0.0277276
Crohn's Disease	MTG	frc	A0A377BTA6	Proteobacteria	Gammaproteobacteria	Enterobacterales	Enterobacteriaceae	Escherichia	Escherichia coli	M2025	Crohn's Disease	0.0920233
Crohn's Disease	MTG	frc	A1ADQ1	Proteobacteria	Gammaproteobacteria	Enterobacterales	Enterobacteriaceae	Escherichia	Escherichia coli APEC O1	M2025	Crohn's Disease	0.0796203
Crohn's Disease	MTG	frc	C3X762	Proteobacteria	Betaproteobacteria	Burkholderiales	Oxalobacteraceae	Oxalobacter	Oxalobacter formigenes HOxBLS	M2025	Crohn's Disease	0.28432
Crohn's Disease	MTG	frc	H1RYM1	Proteobacteria	Betaproteobacteria	Burkholderiales	Burkholderiaceae	Cupriavidus	Cupriavidus basilensis OR16	M2025	Crohn's Disease	0.014713
Crohn's Disease	MTG	frc	O06644	Proteobacteria	Betaproteobacteria	Burkholderiales	Oxalobacteraceae	Oxalobacter	Oxalobacter formigenes	M2025	Crohn's Disease	0.292997
Crohn's Disease	MTS	frc	A0A0D7F737	Proteobacteria	Alphaproteobacteria	Rhizobiales	Bradyrhizobiaceae	Rhodopseudomonas	Rhodopseudomonas palustris	M2025	Crohn's Disease	0.0273464
Crohn's Disease	MTS	frc	A0A0R0LLQ9	Proteobacteria	Betaproteobacteria	Ferrovales	Ferrovaceae	Ferrovum	Ferrovum sp. JA12	M2025	Crohn's Disease	0.0287461
Crohn's Disease	MTS	frc	A0A1F3ZN52	Proteobacteria	Betaproteobacteria	NA	NA	NA	Betaproteobacteria bacterium RIFCSPLOWO2_02_FULL_6	M2025	Crohn's Disease	0.0636365
Crohn's Disease	MTS	frc	A0A1F4IAS5	Proteobacteria	Betaproteobacteria	Burkholderiales	NA	NA	Burkholderiales bacterium RIFCSPHIGHO2_12_FULL_61_	M2025	Crohn's Disease	0.123055
Crohn's Disease	MTS	frc	A0A2W5RAA1	Proteobacteria	Alphaproteobacteria	Rhizobiales	Xanthobacteraceae	Starkeya	Starkeya novella	M2025	Crohn's Disease	0.0135767
Crohn's Disease	MTS	frc	C3X2D4	Proteobacteria	Betaproteobacteria	Burkholderiales	Oxalobacteraceae	Oxalobacter	Oxalobacter formigenes HOxBLS	M2025	Crohn's Disease	0.113934
Crohn's Disease	MTS	frc	C3X762	Proteobacteria	Betaproteobacteria	Burkholderiales	Oxalobacteraceae	Oxalobacter	Oxalobacter formigenes HOxBLS	M2025	Crohn's Disease	3.52213
Crohn's Disease	MTS	frc	H1RYM1	Proteobacteria	Betaproteobacteria	Burkholderiales	Burkholderiaceae	Cupriavidus	Cupriavidus basilensis OR16	M2025	Crohn's Disease	0.00686915
Crohn's Disease	MTS	frc	O06644	Proteobacteria	Betaproteobacteria	Burkholderiales	Oxalobacteraceae	Oxalobacter	Oxalobacter formigenes	M2025	Crohn's Disease	1.42326
Crohn's Disease	MTG	frc	A0A1F4IAS5	Proteobacteria	Betaproteobacteria	Burkholderiales	NA	NA	Burkholderiales bacterium RIFCSPHIGHO2_12_FULL_61_	M2025	Crohn's Disease-nonL3	0.0277276
Crohn's Disease	MTG	frc	A0A377BTA6	Proteobacteria	Gammaproteobacteria	Enterobacterales	Enterobacteriaceae	Escherichia	Escherichia coli	M2025	Crohn's Disease-nonL3	0.0920233
Crohn's Disease	MTG	frc	A1ADQ1	Proteobacteria	Gammaproteobacteria	Enterobacterales	Enterobacteriaceae	Escherichia	Escherichia coli APEC O1	M2025	Crohn's Disease-nonL3	0.0796203
Crohn's Disease	MTG	frc	C3X762	Proteobacteria	Betaproteobacteria	Burkholderiales	Oxalobacteraceae	Oxalobacter	Oxalobacter formigenes HOxBLS	M2025	Crohn's Disease-nonL3	0.28432
Crohn's Disease	MTG	frc	H1RYM1	Proteobacteria	Betaproteobacteria	Burkholderiales	Burkholderiaceae	Cupriavidus	Cupriavidus basilensis OR16	M2025	Crohn's Disease-nonL3	0.014713
Crohn's Disease	MTG	frc	O06644	Proteobacteria	Betaproteobacteria	Burkholderiales	Oxalobacteraceae	Oxalobacter	Oxalobacter formigenes	M2025	Crohn's Disease-nonL3	0.292997
Crohn's Disease	MTS	frc	A0A0D7F737	Proteobacteria	Alphaproteobacteria	Rhizobiales	Bradyrhizobiaceae	Rhodopseudomonas	Rhodopseudomonas palustris	M2025	Crohn's Disease-nonL3	0.0273464
Crohn's Disease	MTS	frc	A0A0R0LLQ9	Proteobacteria	Betaproteobacteria	Ferrovales	Ferrovaceae	Ferrovum	Ferrovum sp. JA12	M2025	Crohn's Disease-nonL3	0.0287461
Crohn's Disease	MTS	frc	A0A1F3ZN52	Proteobacteria	Betaproteobacteria	NA	NA	NA	Betaproteobacteria bacterium RIFCSPLOWO2_02_FULL_6	M2025	Crohn's Disease-nonL3	0.0636365
Crohn's Disease	MTS	frc	A0A1F4IAS5	Proteobacteria	Betaproteobacteria	Burkholderiales	NA	NA	Burkholderiales bacterium RIFCSPHIGHO2_12_FULL_61_	M2025	Crohn's Disease-nonL3	0.123055
Crohn's Disease	MTS	frc	A0A2W5RAA1	Proteobacteria	Alphaproteobacteria	Rhizobiales	Xanthobacteraceae	Starkeya	Starkeya novella	M2025	Crohn's Disease-nonL3	0.0135767
Crohn's Disease	MTS	frc	C3X2D4	Proteobacteria	Betaproteobacteria	Burkholderiales	Oxalobacteraceae	Oxalobacter	Oxalobacter formigenes HOxBLS	M2025	Crohn's Disease-nonL3	0.113934
Crohn's Disease	MTS	frc	C3X762	Proteobacteria	Betaproteobacteria	Burkholderiales	Oxalobacteraceae	Oxalobacter	Oxalobacter formigenes HOxBLS	M2025	Crohn's Disease-nonL3	3.52213
Crohn's Disease	MTS	frc	H1RYM1	Proteobacteria	Betaproteobacteria	Burkholderiales	Burkholderiaceae	Cupriavidus	Cupriavidus basilensis OR16	M2025	Crohn's Disease-nonL3	0.00686915
Crohn's Disease	MTS	frc	O06644	Proteobacteria	Betaproteobacteria	Burkholderiales	Oxalobacteraceae	Oxalobacter	Oxalobacter formigenes	M2025	Crohn's Disease-nonL3	1.42326
Crohn's Disease	MTG	frc	A0A072MW66	Actinobacteria	Actinobacteria	Bifidobacteriales	Bifidobacteriaceae	Bifidobacterium	Bifidobacterium pseudocatenulatum IPLA36007	M2027	Crohn's Disease	0.257618
Crohn's Disease	MTG	frc	A0A085GUA8	Proteobacteria	Gammaproteobacteria	Enterobacterales	Hafniaceae	Hafnia	Hafnia alvei ATCC 13337	M2027	Crohn's Disease	0.0247683
Crohn's Disease	MTG	frc	A0A1B1SBJ2	Bacteroidetes	Bacteroidia	Bacteroidales	Muribaculaceae	Muribaculum	Muribaculum intestinale	M2027	Crohn's Disease	0.0262857
Crohn's Disease	MTG	frc	A0A1G4TYH4	Proteobacteria	Alphaproteobacteria	Rhizobiales	Xanthobacteraceae	Ancylobacter	Ancylobacter rudongensis	M2027	Crohn's Disease	0.0343502
Crohn's Disease	MTG	frc	A0A2X5G0L0	Proteobacteria	Gammaproteobacteria	Enterobacterales	Enterobacteriaceae	Escherichia	Escherichia coli	M2027	Crohn's Disease	0.0394217
Crohn's Disease	MTG	frc	A0A2Y0SWK3	Proteobacteria	Gammaproteobacteria	Enterobacterales	Enterobacteriaceae	Escherichia	Escherichia coli	M2027	Crohn's Disease	0.0164254
Crohn's Disease	MTG	frc	A0A377BTA6	Proteobacteria	Gammaproteobacteria	Enterobacterales	Enterobacteriaceae	Escherichia	Escherichia coli	M2027	Crohn's Disease	0.101931
Crohn's Disease	MTG	frc	A1ADQ1	Proteobacteria	Gammaproteobacteria	Enterobacterales	Enterobacteriaceae	Escherichia	Escherichia coli APEC O1	M2027	Crohn's Disease	0.336928
Crohn's Disease	MTG	frc	B5YYX4	Proteobacteria	Gammaproteobacteria	Enterobacterales	Enterobacteriaceae	Escherichia	Escherichia coli O157:H7 str. EC4115	M2027	Crohn's Disease	0.0543395
Crohn's Disease	MTG	frc	C3X762	Proteobacteria	Betaproteobacteria	Burkholderiales	Oxalobacteraceae	Oxalobacter	Oxalobacter formigenes HOxBLS	M2027	Crohn's Disease	0.0791259
Crohn's Disease	MTG	frc	O06644	Proteobacteria	Betaproteobacteria	Burkholderiales	Oxalobacteraceae	Oxalobacter	Oxalobacter formigenes	M2027	Crohn's Disease	0.0755722
Crohn's Disease	MTG	frc	Q8FFE8	Proteobacteria	Gammaproteobacteria	Enterobacterales	Enterobacteriaceae	Escherichia	Escherichia coli CFT073	M2027	Crohn's Disease	0.108031
Crohn's Disease	MTS	frc	A0A0R0MNW7	Proteobacteria	Betaproteobacteria	Burkholderiales	Comamonadaceae	Curvibacter	Curvibacter sp. PAE-UM	M2027	Crohn's Disease	0.0297422
Crohn's Disease	MTS	frc	A0A1F3ZN52	Proteobacteria	Betaproteobacteria	NA	NA	NA	Betaproteobacteria bacterium RIFCSPLOWO2_02_FULL_6	M2027	Crohn's Disease	0.0272772
Crohn's Disease	MTS	frc	C3X762	Proteobacteria	Betaproteobacteria	Burkholderiales	Oxalobacteraceae	Oxalobacter	Oxalobacter formigenes HOxBLS	M2027	Crohn's Disease	0.333062
Crohn's Disease	MTS	frc	O06644	Proteobacteria	Betaproteobacteria	Burkholderiales	Oxalobacteraceae	Oxalobacter	Oxalobacter formigenes	M2027	Crohn's Disease	0.113826
Crohn's Disease	MTG	frc	A0A072MW66	Actinobacteria	Actinobacteria	Bifidobacteriales	Bifidobacteriaceae	Bifidobacterium	Bifidobacterium pseudocatenulatum IPLA36007	M2027	Crohn's Disease-nonL3	0.257618
Crohn's Disease	MTG	frc	A0A085GUA8	Proteobacteria	Gammaproteobacteria	Enterobacterales	Hafniaceae	Hafnia	Hafnia alvei ATCC 13337	M2027	Crohn's Disease-nonL3	0.0247683
Crohn's Disease	MTG	frc	A0A1B1SBJ2	Bacteroidetes	Bacteroidia	Bacteroidales	Muribaculaceae	Muribaculum	Muribaculum intestinale	M2027	Crohn's Disease-nonL3	0.0262857
Crohn's Disease	MTG	frc	A0A1G4TYH4	Proteobacteria	Alphaproteobacteria	Rhizobiales	Xanthobacteraceae	Ancylobacter	Ancylobacter rudongensis	M2027	Crohn's Disease-nonL3	0.0343502
Crohn's Disease	MTG	frc	A0A2X5G0L0	Proteobacteria	Gammaproteobacteria	Enterobacterales	Enterobacteriaceae	Escherichia	Escherichia coli	M2027	Crohn's Disease-nonL3	0.0394217
Crohn's Disease	MTG	frc	A0A2Y0SWK3	Proteobacteria	Gammaproteobacteria	Enterobacterales	Enterobacteriaceae	Escherichia	Escherichia coli	M2027	Crohn's Disease-nonL3	0.0164254
Crohn's Disease	MTG	frc	A0A377BTA6	Proteobacteria	Gammaproteobacteria	Enterobacterales	Enterobacteriaceae	Escherichia	Escherichia coli	M2027	Crohn's Disease-nonL3	0.101931
Crohn's Disease	MTG	frc	A1ADQ1	Proteobacteria	Gammaproteobacteria	Enterobacterales	Enterobacteriaceae	Escherichia	Escherichia coli APEC O1	M2027	Crohn's Disease-nonL3	0.336928
Crohn's Disease	MTG	frc	B5YYX4	Proteobacteria	Gammaproteobacteria	Enterobacterales	Enterobacteriaceae	Escherichia	Escherichia coli O157:H7 str. EC4115	M2027	Crohn's Disease-nonL3	0.0543395
Crohn's Disease	MTG	frc	C3X762	Proteobacteria	Betaproteobacteria	Burkholderiales	Oxalobacteraceae	Oxalobacter	Oxalobacter formigenes HOxBLS	M2027	Crohn's Disease-nonL3	0.0791259
Crohn's Disease	MTG	frc	O06644	Proteobacteria	Betaproteobacteria	Burkholderiales	Oxalobacteraceae	Oxalobacter	Oxalobacter formigenes	M2027	Crohn's Disease-nonL3	0.0755722
Crohn's Disease	MTG	frc	Q8FFE8	Proteobacteria	Gammaproteobacteria	Enterobacterales	Enterobacteriaceae	Escherichia	Escherichia coli CFT073	M2027	Crohn's Disease-nonL3	0.108031
Crohn's Disease	MTS	frc	A0A0R0MNW7	Proteobacteria	Betaproteobacteria	Burkholderiales	Comamonadaceae	Curvibacter	Curvibacter sp. PAE-UM	M2027	Crohn's Disease-nonL3	0.0297422
Crohn's Disease	MTS	frc	A0A1F3ZN52	Proteobacteria	Betaproteobacteria	NA	NA	NA	Betaproteobacteria bacterium RIFCSPLOWO2_02_FULL_6	M2027	Crohn's Disease-nonL3	0.0272772
Crohn's Disease	MTS	frc	C3X762	Proteobacteria	Betaproteobacteria	Burkholderiales	Oxalobacteraceae	Oxalobacter	Oxalobacter formigenes HOxBLS	M2027	Crohn's Disease-nonL3	0.333062
Crohn's Disease	MTS	frc	O06644	Proteobacteria	Betaproteobacteria	Burkholderiales	Oxalobacteraceae	Oxalobacter	Oxalobacter formigenes	M2027	Crohn's Disease-nonL3	0.113826
Crohn's Disease	MTG	frc	A0A085GUA8	Proteobacteria	Gammaproteobacteria	Enterobacterales	Hafniaceae	Hafnia	Hafnia alvei ATCC 13337	M2028	Crohn's Disease	0.244881
Crohn's Disease	MTG	frc	A0A1G4TYH4	Proteobacteria	Alphaproteobacteria	Rhizobiales	Xanthobacteraceae	Ancylobacter	Ancylobacter rudongensis	M2028	Crohn's Disease	0.0335242
Crohn's Disease	MTG	frc	A0A1Q6U8Z5	Proteobacteria	Alphaproteobacteria	Rhodospirillales	Rhodospirillaceae	Azospirillum	Azospirillum sp. 51_20	M2028	Crohn's Disease	0.0337626
Crohn's Disease	MTG	frc	A0A377BTA6	Proteobacteria	Gammaproteobacteria	Enterobacterales	Enterobacteriaceae	Escherichia	Escherichia coli	M2028	Crohn's Disease	0.200604
Crohn's Disease	MTG	frc	A1ADQ1	Proteobacteria	Gammaproteobacteria	Enterobacterales	Enterobacteriaceae	Escherichia	Escherichia coli APEC O1	M2028	Crohn's Disease	0.240486
Crohn's Disease	MTG	frc	A0A085GUA8	Proteobacteria	Gammaproteobacteria	Enterobacterales	Hafniaceae	Hafnia	Hafnia alvei ATCC 13337	M2028	Crohn's Disease-nonL3	0.244881
Crohn's Disease	MTG	frc	A0A1G4TYH4	Proteobacteria	Alphaproteobacteria	Rhizobiales	Xanthobacteraceae	Ancylobacter	Ancylobacter rudongensis	M2028	Crohn's Disease-nonL3	0.0335242
Crohn's Disease	MTG	frc	A0A1Q6U8Z5	Proteobacteria	Alphaproteobacteria	Rhodospirillales	Rhodospirillaceae	Azospirillum	Azospirillum sp. 51_20	M2028	Crohn's Disease-nonL3	0.0337626
Crohn's Disease	MTG	frc	A0A377BTA6	Proteobacteria	Gammaproteobacteria	Enterobacterales	Enterobacteriaceae	Escherichia	Escherichia coli	M2028	Crohn's Disease-nonL3	0.200604
Crohn's Disease	MTG	frc	A1ADQ1	Proteobacteria	Gammaproteobacteria	Enterobacterales	Enterobacteriaceae	Escherichia	Escherichia coli APEC O1	M2028	Crohn's Disease-nonL3	0.240486
Crohn's Disease	MTG	frc	A0A072MW66	Actinobacteria	Actinobacteria	Bifidobacteriales	Bifidobacteriaceae	Bifidobacterium	Bifidobacterium pseudocatenulatum IPLA36007	M2034	Crohn's Disease	0.247229
Crohn's Disease	MTG	frc	A0A087ADU5	Actinobacteria	Actinobacteria	Bifidobacteriales	Bifidobacteriaceae	Bifidobacterium	Bifidobacterium choerinum	M2034	Crohn's Disease	0.171604
Crohn's Disease	MTG	frc	A0A087QB11	Firmicutes	Bacilli	Lactobacillales	Lactobacillaceae	Lactobacillus	Lactobacillus gasseri SV-16A-US	M2034	Crohn's Disease	0.0306176
Crohn's Disease	MTG	frc	A0A0H2QFH1	Proteobacteria	Gammaproteobacteria	Enterobacterales	Morganellaceae	Moellerella	Moellerella wisconsensis	M2034	Crohn's Disease	0.0610514
Crohn's Disease	MTG	frc	A0A0R1HAW1	Firmicutes	Bacilli	Lactobacillales	Lactobacillaceae	Lactobacillus	Lactobacillus amylovorus DSM 20531	M2034	Crohn's Disease	0.0311693
Crohn's Disease	MTG	frc	A0A1B7JUB4	Proteobacteria	Gammaproteobacteria	Enterobacterales	Morganellaceae	Providencia	Providencia heimbachae ATCC 35613	M2034	Crohn's Disease	0.0607593
Crohn's Disease	MTG	frc	A0A1B8SW58	Proteobacteria	Gammaproteobacteria	Enterobacterales	Morganellaceae	Providencia	Providencia rettgeri	M2034	Crohn's Disease	0.0607593
Crohn's Disease	MTG	frc	A0A1E3SB62	Actinobacteria	Actinobacteria	Corynebacteriales	Mycobacteriaceae	Mycobacterium	Mycobacterium sherrisii	M2034	Crohn's Disease	0.0269435
Crohn's Disease	MTG	frc	A0A1M4E412	Actinobacteria	Actinobacteria	Streptosporangiales	Streptosporangiaceae	Nonomuraea	Nonomuraea gerenzanensis	M2034	Crohn's Disease	0.0624014
Crohn's Disease	MTG	frc	A0A1V8Q5N2	Actinobacteria	Actinobacteria	Bifidobacteriales	Bifidobacteriaceae	Bifidobacterium	Bifidobacterium dentium	M2034	Crohn's Disease	0.722353
Crohn's Disease	MTG	frc	A0A1X3KZX2	Proteobacteria	Gammaproteobacteria	Enterobacterales	Enterobacteriaceae	Escherichia	Escherichia coli H420	M2034	Crohn's Disease	0.0332672
Crohn's Disease	MTG	frc	A0A2X1KJL9	Proteobacteria	Gammaproteobacteria	Enterobacterales	Enterobacteriaceae	Escherichia	Escherichia coli	M2034	Crohn's Disease	0.0374338
Crohn's Disease	MTG	frc	A0A377BTA6	Proteobacteria	Gammaproteobacteria	Enterobacterales	Enterobacteriaceae	Escherichia	Escherichia coli	M2034	Crohn's Disease	7.77904
Crohn's Disease	MTG	frc	A1ADQ1	Proteobacteria	Gammaproteobacteria	Enterobacterales	Enterobacteriaceae	Escherichia	Escherichia coli APEC O1	M2034	Crohn's Disease	5.49445
Crohn's Disease	MTG	frc	G1U9U4	Firmicutes	Bacilli	Lactobacillales	Lactobacillaceae	Lactobacillus	Lactobacillus acidophilus	M2034	Crohn's Disease	0.155496
Crohn's Disease	MTG	frc	Q8FFE8	Proteobacteria	Gammaproteobacteria	Enterobacterales	Enterobacteriaceae	Escherichia	Escherichia coli CFT073	M2034	Crohn's Disease	0.0820159
Crohn's Disease	MTS	frc	A0A1V8Q5N2	Actinobacteria	Actinobacteria	Bifidobacteriales	Bifidobacteriaceae	Bifidobacterium	Bifidobacterium dentium	M2034	Crohn's Disease	0.0347188
Crohn's Disease	MTS	frc	A0A377BTA6	Proteobacteria	Gammaproteobacteria	Enterobacterales	Enterobacteriaceae	Escherichia	Escherichia coli	M2034	Crohn's Disease	0.390387
Crohn's Disease	MTS	frc	A1ADQ1	Proteobacteria	Gammaproteobacteria	Enterobacterales	Enterobacteriaceae	Escherichia	Escherichia coli APEC O1	M2034	Crohn's Disease	0.0445787
Crohn's Disease	MTS	frc	C3X762	Proteobacteria	Betaproteobacteria	Burkholderiales	Oxalobacteraceae	Oxalobacter	Oxalobacter formigenes HOxBLS	M2034	Crohn's Disease	0.119859
Crohn's Disease	MTG	frc	A0A072MW66	Actinobacteria	Actinobacteria	Bifidobacteriales	Bifidobacteriaceae	Bifidobacterium	Bifidobacterium pseudocatenulatum IPLA36007	M2034	Crohn's Disease-L3	0.247229
Crohn's Disease	MTG	frc	A0A087ADU5	Actinobacteria	Actinobacteria	Bifidobacteriales	Bifidobacteriaceae	Bifidobacterium	Bifidobacterium choerinum	M2034	Crohn's Disease-L3	0.171604
Crohn's Disease	MTG	frc	A0A087QB11	Firmicutes	Bacilli	Lactobacillales	Lactobacillaceae	Lactobacillus	Lactobacillus gasseri SV-16A-US	M2034	Crohn's Disease-L3	0.0306176
Crohn's Disease	MTG	frc	A0A0H2QFH1	Proteobacteria	Gammaproteobacteria	Enterobacterales	Morganellaceae	Moellerella	Moellerella wisconsensis	M2034	Crohn's Disease-L3	0.0610514
Crohn's Disease	MTG	frc	A0A0R1HAW1	Firmicutes	Bacilli	Lactobacillales	Lactobacillaceae	Lactobacillus	Lactobacillus amylovorus DSM 20531	M2034	Crohn's Disease-L3	0.0311693
Crohn's Disease	MTG	frc	A0A1B7JUB4	Proteobacteria	Gammaproteobacteria	Enterobacterales	Morganellaceae	Providencia	Providencia heimbachae ATCC 35613	M2034	Crohn's Disease-L3	0.0607593
Crohn's Disease	MTG	frc	A0A1B8SW58	Proteobacteria	Gammaproteobacteria	Enterobacterales	Morganellaceae	Providencia	Providencia rettgeri	M2034	Crohn's Disease-L3	0.0607593
Crohn's Disease	MTG	frc	A0A1E3SB62	Actinobacteria	Actinobacteria	Corynebacteriales	Mycobacteriaceae	Mycobacterium	Mycobacterium sherrisii	M2034	Crohn's Disease-L3	0.0269435
Crohn's Disease	MTG	frc	A0A1M4E412	Actinobacteria	Actinobacteria	Streptosporangiales	Streptosporangiaceae	Nonomuraea	Nonomuraea gerenzanensis	M2034	Crohn's Disease-L3	0.0624014
Crohn's Disease	MTG	frc	A0A1V8Q5N2	Actinobacteria	Actinobacteria	Bifidobacteriales	Bifidobacteriaceae	Bifidobacterium	Bifidobacterium dentium	M2034	Crohn's Disease-L3	0.722353
Crohn's Disease	MTG	frc	A0A1X3KZX2	Proteobacteria	Gammaproteobacteria	Enterobacterales	Enterobacteriaceae	Escherichia	Escherichia coli H420	M2034	Crohn's Disease-L3	0.0332672
Crohn's Disease	MTG	frc	A0A2X1KJL9	Proteobacteria	Gammaproteobacteria	Enterobacterales	Enterobacteriaceae	Escherichia	Escherichia coli	M2034	Crohn's Disease-L3	0.0374338
Crohn's Disease	MTG	frc	A0A377BTA6	Proteobacteria	Gammaproteobacteria	Enterobacterales	Enterobacteriaceae	Escherichia	Escherichia coli	M2034	Crohn's Disease-L3	7.77904
Crohn's Disease	MTG	frc	A1ADQ1	Proteobacteria	Gammaproteobacteria	Enterobacterales	Enterobacteriaceae	Escherichia	Escherichia coli APEC O1	M2034	Crohn's Disease-L3	5.49445
Crohn's Disease	MTG	frc	G1U9U4	Firmicutes	Bacilli	Lactobacillales	Lactobacillaceae	Lactobacillus	Lactobacillus acidophilus	M2034	Crohn's Disease-L3	0.155496
Crohn's Disease	MTG	frc	Q8FFE8	Proteobacteria	Gammaproteobacteria	Enterobacterales	Enterobacteriaceae	Escherichia	Escherichia coli CFT073	M2034	Crohn's Disease-L3	0.0820159
Crohn's Disease	MTS	frc	A0A1V8Q5N2	Actinobacteria	Actinobacteria	Bifidobacteriales	Bifidobacteriaceae	Bifidobacterium	Bifidobacterium dentium	M2034	Crohn's Disease-L3	0.0347188
Crohn's Disease	MTS	frc	A0A377BTA6	Proteobacteria	Gammaproteobacteria	Enterobacterales	Enterobacteriaceae	Escherichia	Escherichia coli	M2034	Crohn's Disease-L3	0.390387
Crohn's Disease	MTS	frc	A1ADQ1	Proteobacteria	Gammaproteobacteria	Enterobacterales	Enterobacteriaceae	Escherichia	Escherichia coli APEC O1	M2034	Crohn's Disease-L3	0.0445787
Crohn's Disease	MTS	frc	C3X762	Proteobacteria	Betaproteobacteria	Burkholderiales	Oxalobacteraceae	Oxalobacter	Oxalobacter formigenes HOxBLS	M2034	Crohn's Disease-L3	0.119859
Crohn's Disease	MTG	frc	A0A062XDE4	Firmicutes	Bacilli	Lactobacillales	Lactobacillaceae	Lactobacillus	Lactobacillus animalis	M2068	Crohn's Disease	0.335525
Crohn's Disease	MTG	frc	A0A072MW66	Actinobacteria	Actinobacteria	Bifidobacteriales	Bifidobacteriaceae	Bifidobacterium	Bifidobacterium pseudocatenulatum IPLA36007	M2068	Crohn's Disease	2.67404
Crohn's Disease	MTG	frc	A0A087ADU5	Actinobacteria	Actinobacteria	Bifidobacteriales	Bifidobacteriaceae	Bifidobacterium	Bifidobacterium choerinum	M2068	Crohn's Disease	0.0761446
Crohn's Disease	MTG	frc	A0A087B567	Actinobacteria	Actinobacteria	Bifidobacteriales	Bifidobacteriaceae	Bifidobacterium	Bifidobacterium cuniculi	M2068	Crohn's Disease	0.110722
Crohn's Disease	MTG	frc	A0A0R1UH43	Firmicutes	Bacilli	Lactobacillales	Lactobacillaceae	Lactobacillus	Lactobacillus kalixensis DSM 16043	M2068	Crohn's Disease	0.0547434
Crohn's Disease	MTG	frc	A0A174BHB6	Actinobacteria	Actinobacteria	Bifidobacteriales	Bifidobacteriaceae	Bifidobacterium	Bifidobacterium pseudocatenulatum	M2068	Crohn's Disease	0.304921
Crohn's Disease	MTG	frc	A0A1Q6EPI6	Actinobacteria	Actinobacteria	Bifidobacteriales	Bifidobacteriaceae	Bifidobacterium	Bifidobacterium sp. 56_9_plus	M2068	Crohn's Disease	0.229888
Crohn's Disease	MTG	frc	A0A1V8Q5N2	Actinobacteria	Actinobacteria	Bifidobacteriales	Bifidobacteriaceae	Bifidobacterium	Bifidobacterium dentium	M2068	Crohn's Disease	0.487061
Crohn's Disease	MTG	frc	A0A377BTA6	Proteobacteria	Gammaproteobacteria	Enterobacterales	Enterobacteriaceae	Escherichia	Escherichia coli	M2068	Crohn's Disease	0.0712578
Crohn's Disease	MTG	frc	A1ADQ1	Proteobacteria	Gammaproteobacteria	Enterobacterales	Enterobacteriaceae	Escherichia	Escherichia coli APEC O1	M2068	Crohn's Disease	0.138189
Crohn's Disease	MTG	frc	G1U9U4	Firmicutes	Bacilli	Lactobacillales	Lactobacillaceae	Lactobacillus	Lactobacillus acidophilus	M2068	Crohn's Disease	0.0551124
Crohn's Disease	MTS	frc	A0A072MW66	Actinobacteria	Actinobacteria	Bifidobacteriales	Bifidobacteriaceae	Bifidobacterium	Bifidobacterium pseudocatenulatum IPLA36007	M2068	Crohn's Disease	0.0365279
Crohn's Disease	MTS	frc	A0A1V8Q5N2	Actinobacteria	Actinobacteria	Bifidobacteriales	Bifidobacteriaceae	Bifidobacterium	Bifidobacterium dentium	M2068	Crohn's Disease	0.144771
Crohn's Disease	MTG	frc	A0A062XDE4	Firmicutes	Bacilli	Lactobacillales	Lactobacillaceae	Lactobacillus	Lactobacillus animalis	M2068	Crohn's Disease-nonL3	0.335525
Crohn's Disease	MTG	frc	A0A072MW66	Actinobacteria	Actinobacteria	Bifidobacteriales	Bifidobacteriaceae	Bifidobacterium	Bifidobacterium pseudocatenulatum IPLA36007	M2068	Crohn's Disease-nonL3	2.67404
Crohn's Disease	MTG	frc	A0A087ADU5	Actinobacteria	Actinobacteria	Bifidobacteriales	Bifidobacteriaceae	Bifidobacterium	Bifidobacterium choerinum	M2068	Crohn's Disease-nonL3	0.0761446
Crohn's Disease	MTG	frc	A0A087B567	Actinobacteria	Actinobacteria	Bifidobacteriales	Bifidobacteriaceae	Bifidobacterium	Bifidobacterium cuniculi	M2068	Crohn's Disease-nonL3	0.110722
Crohn's Disease	MTG	frc	A0A0R1UH43	Firmicutes	Bacilli	Lactobacillales	Lactobacillaceae	Lactobacillus	Lactobacillus kalixensis DSM 16043	M2068	Crohn's Disease-nonL3	0.0547434
Crohn's Disease	MTG	frc	A0A174BHB6	Actinobacteria	Actinobacteria	Bifidobacteriales	Bifidobacteriaceae	Bifidobacterium	Bifidobacterium pseudocatenulatum	M2068	Crohn's Disease-nonL3	0.304921
Crohn's Disease	MTG	frc	A0A1Q6EPI6	Actinobacteria	Actinobacteria	Bifidobacteriales	Bifidobacteriaceae	Bifidobacterium	Bifidobacterium sp. 56_9_plus	M2068	Crohn's Disease-nonL3	0.229888
Crohn's Disease	MTG	frc	A0A1V8Q5N2	Actinobacteria	Actinobacteria	Bifidobacteriales	Bifidobacteriaceae	Bifidobacterium	Bifidobacterium dentium	M2068	Crohn's Disease-nonL3	0.487061
Crohn's Disease	MTG	frc	A0A377BTA6	Proteobacteria	Gammaproteobacteria	Enterobacterales	Enterobacteriaceae	Escherichia	Escherichia coli	M2068	Crohn's Disease-nonL3	0.0712578
Crohn's Disease	MTG	frc	A1ADQ1	Proteobacteria	Gammaproteobacteria	Enterobacterales	Enterobacteriaceae	Escherichia	Escherichia coli APEC O1	M2068	Crohn's Disease-nonL3	0.138189
Crohn's Disease	MTG	frc	G1U9U4	Firmicutes	Bacilli	Lactobacillales	Lactobacillaceae	Lactobacillus	Lactobacillus acidophilus	M2068	Crohn's Disease-nonL3	0.0551124
Crohn's Disease	MTS	frc	A0A072MW66	Actinobacteria	Actinobacteria	Bifidobacteriales	Bifidobacteriaceae	Bifidobacterium	Bifidobacterium pseudocatenulatum IPLA36007	M2068	Crohn's Disease-nonL3	0.0365279
Crohn's Disease	MTS	frc	A0A1V8Q5N2	Actinobacteria	Actinobacteria	Bifidobacteriales	Bifidobacteriaceae	Bifidobacterium	Bifidobacterium dentium	M2068	Crohn's Disease-nonL3	0.144771
Crohn's Disease	MTG	frc	A0A0L6JA28	Proteobacteria	Alphaproteobacteria	Rhizobiales	Methylobacteriaceae	Methylobacterium	Methylobacterium sp. ARG-1	M2085	Crohn's Disease	0.0427734
Crohn's Disease	MTG	frc	A1ADQ1	Proteobacteria	Gammaproteobacteria	Enterobacterales	Enterobacteriaceae	Escherichia	Escherichia coli APEC O1	M2085	Crohn's Disease	0.0721317
Crohn's Disease	MTG	frc	A0A0L6JA28	Proteobacteria	Alphaproteobacteria	Rhizobiales	Methylobacteriaceae	Methylobacterium	Methylobacterium sp. ARG-1	M2085	Crohn's Disease-nonL3	0.0427734
Crohn's Disease	MTG	frc	A1ADQ1	Proteobacteria	Gammaproteobacteria	Enterobacterales	Enterobacteriaceae	Escherichia	Escherichia coli APEC O1	M2085	Crohn's Disease-nonL3	0.0721317
Crohn's Disease	MTG	frc	A0A072MW66	Actinobacteria	Actinobacteria	Bifidobacteriales	Bifidobacteriaceae	Bifidobacterium	Bifidobacterium pseudocatenulatum IPLA36007	P6005	Crohn's Disease	0.228797
Crohn's Disease	MTG	frc	A0A087ADU5	Actinobacteria	Actinobacteria	Bifidobacteriales	Bifidobacteriaceae	Bifidobacterium	Bifidobacterium choerinum	P6005	Crohn's Disease	0.107935
Crohn's Disease	MTG	frc	A0A087B567	Actinobacteria	Actinobacteria	Bifidobacteriales	Bifidobacteriaceae	Bifidobacterium	Bifidobacterium cuniculi	P6005	Crohn's Disease	0.0938786
Crohn's Disease	MTG	frc	A0A0A7I974	Actinobacteria	Actinobacteria	Bifidobacteriales	Bifidobacteriaceae	Bifidobacterium	Bifidobacterium pseudolongum PV8-2	P6005	Crohn's Disease	0.0463692
Crohn's Disease	MTG	frc	A0A0L7BLA3	Actinobacteria	Actinobacteria	Bifidobacteriales	Bifidobacteriaceae	Bifidobacterium	Bifidobacterium animalis subsp. animalis MCC 0483	P6005	Crohn's Disease	0.323511
Crohn's Disease	MTG	frc	A0A0R1UH43	Firmicutes	Bacilli	Lactobacillales	Lactobacillaceae	Lactobacillus	Lactobacillus kalixensis DSM 16043	P6005	Crohn's Disease	0.0799751
Crohn's Disease	MTG	frc	A0A174BHB6	Actinobacteria	Actinobacteria	Bifidobacteriales	Bifidobacteriaceae	Bifidobacterium	Bifidobacterium pseudocatenulatum	P6005	Crohn's Disease	0.0654717
Crohn's Disease	MTG	frc	A0A1Q6EPI6	Actinobacteria	Actinobacteria	Bifidobacteriales	Bifidobacteriaceae	Bifidobacterium	Bifidobacterium sp. 56_9_plus	P6005	Crohn's Disease	0.0766209
Crohn's Disease	MTG	frc	A0A1V8Q5N2	Actinobacteria	Actinobacteria	Bifidobacteriales	Bifidobacteriaceae	Bifidobacterium	Bifidobacterium dentium	P6005	Crohn's Disease	1.06829
Crohn's Disease	MTG	frc	A0A248X7K1	Actinobacteria	Actinobacteria	Bifidobacteriales	Bifidobacteriaceae	Bifidobacterium	Bifidobacterium pseudolongum	P6005	Crohn's Disease	0.0667955
Crohn's Disease	MTG	frc	A0A2A2EHW6	Actinobacteria	Actinobacteria	Bifidobacteriales	Bifidobacteriaceae	Bifidobacterium	Bifidobacterium criceti	P6005	Crohn's Disease	0.0535826
Crohn's Disease	MTG	frc	A0A377BTA6	Proteobacteria	Gammaproteobacteria	Enterobacterales	Enterobacteriaceae	Escherichia	Escherichia coli	P6005	Crohn's Disease	0.488018
Crohn's Disease	MTG	frc	A1ADQ1	Proteobacteria	Gammaproteobacteria	Enterobacterales	Enterobacteriaceae	Escherichia	Escherichia coli APEC O1	P6005	Crohn's Disease	0.0830674
Crohn's Disease	MTG	frc	G1U9U4	Firmicutes	Bacilli	Lactobacillales	Lactobacillaceae	Lactobacillus	Lactobacillus acidophilus	P6005	Crohn's Disease	0.0621739
Crohn's Disease	MTS	frc	A0A2A2EHW6	Actinobacteria	Actinobacteria	Bifidobacteriales	Bifidobacteriaceae	Bifidobacterium	Bifidobacterium criceti	P6005	Crohn's Disease	0.0425887
Crohn's Disease	MTS	frc	O06644	Proteobacteria	Betaproteobacteria	Burkholderiales	Oxalobacteraceae	Oxalobacter	Oxalobacter formigenes	P6005	Crohn's Disease	0.117766
Crohn's Disease	MTG	frc	A0A072MW66	Actinobacteria	Actinobacteria	Bifidobacteriales	Bifidobacteriaceae	Bifidobacterium	Bifidobacterium pseudocatenulatum IPLA36007	P6005	Crohn's Disease-L3	0.228797
Crohn's Disease	MTG	frc	A0A087ADU5	Actinobacteria	Actinobacteria	Bifidobacteriales	Bifidobacteriaceae	Bifidobacterium	Bifidobacterium choerinum	P6005	Crohn's Disease-L3	0.107935
Crohn's Disease	MTG	frc	A0A087B567	Actinobacteria	Actinobacteria	Bifidobacteriales	Bifidobacteriaceae	Bifidobacterium	Bifidobacterium cuniculi	P6005	Crohn's Disease-L3	0.0938786
Crohn's Disease	MTG	frc	A0A0A7I974	Actinobacteria	Actinobacteria	Bifidobacteriales	Bifidobacteriaceae	Bifidobacterium	Bifidobacterium pseudolongum PV8-2	P6005	Crohn's Disease-L3	0.0463692
Crohn's Disease	MTG	frc	A0A0L7BLA3	Actinobacteria	Actinobacteria	Bifidobacteriales	Bifidobacteriaceae	Bifidobacterium	Bifidobacterium animalis subsp. animalis MCC 0483	P6005	Crohn's Disease-L3	0.323511
Crohn's Disease	MTG	frc	A0A0R1UH43	Firmicutes	Bacilli	Lactobacillales	Lactobacillaceae	Lactobacillus	Lactobacillus kalixensis DSM 16043	P6005	Crohn's Disease-L3	0.0799751
Crohn's Disease	MTG	frc	A0A174BHB6	Actinobacteria	Actinobacteria	Bifidobacteriales	Bifidobacteriaceae	Bifidobacterium	Bifidobacterium pseudocatenulatum	P6005	Crohn's Disease-L3	0.0654717
Crohn's Disease	MTG	frc	A0A1Q6EPI6	Actinobacteria	Actinobacteria	Bifidobacteriales	Bifidobacteriaceae	Bifidobacterium	Bifidobacterium sp. 56_9_plus	P6005	Crohn's Disease-L3	0.0766209
Crohn's Disease	MTG	frc	A0A1V8Q5N2	Actinobacteria	Actinobacteria	Bifidobacteriales	Bifidobacteriaceae	Bifidobacterium	Bifidobacterium dentium	P6005	Crohn's Disease-L3	1.06829
Crohn's Disease	MTG	frc	A0A248X7K1	Actinobacteria	Actinobacteria	Bifidobacteriales	Bifidobacteriaceae	Bifidobacterium	Bifidobacterium pseudolongum	P6005	Crohn's Disease-L3	0.0667955
Crohn's Disease	MTG	frc	A0A2A2EHW6	Actinobacteria	Actinobacteria	Bifidobacteriales	Bifidobacteriaceae	Bifidobacterium	Bifidobacterium criceti	P6005	Crohn's Disease-L3	0.0535826
Crohn's Disease	MTG	frc	A0A377BTA6	Proteobacteria	Gammaproteobacteria	Enterobacterales	Enterobacteriaceae	Escherichia	Escherichia coli	P6005	Crohn's Disease-L3	0.488018
Crohn's Disease	MTG	frc	A1ADQ1	Proteobacteria	Gammaproteobacteria	Enterobacterales	Enterobacteriaceae	Escherichia	Escherichia coli APEC O1	P6005	Crohn's Disease-L3	0.0830674
Crohn's Disease	MTG	frc	G1U9U4	Firmicutes	Bacilli	Lactobacillales	Lactobacillaceae	Lactobacillus	Lactobacillus acidophilus	P6005	Crohn's Disease-L3	0.0621739
Crohn's Disease	MTS	frc	A0A2A2EHW6	Actinobacteria	Actinobacteria	Bifidobacteriales	Bifidobacteriaceae	Bifidobacterium	Bifidobacterium criceti	P6005	Crohn's Disease-L3	0.0425887
Crohn's Disease	MTS	frc	O06644	Proteobacteria	Betaproteobacteria	Burkholderiales	Oxalobacteraceae	Oxalobacter	Oxalobacter formigenes	P6005	Crohn's Disease-L3	0.117766
Crohn's Disease	MTG	frc	A0A072MW66	Actinobacteria	Actinobacteria	Bifidobacteriales	Bifidobacteriaceae	Bifidobacterium	Bifidobacterium pseudocatenulatum IPLA36007	P6009	Crohn's Disease	2.38426
Crohn's Disease	MTG	frc	A0A174BHB6	Actinobacteria	Actinobacteria	Bifidobacteriales	Bifidobacteriaceae	Bifidobacterium	Bifidobacterium pseudocatenulatum	P6009	Crohn's Disease	0.204229
Crohn's Disease	MTG	frc	A0A1Q6EPI6	Actinobacteria	Actinobacteria	Bifidobacteriales	Bifidobacteriaceae	Bifidobacterium	Bifidobacterium sp. 56_9_plus	P6009	Crohn's Disease	0.30438
Crohn's Disease	MTG	frc	A0A1X3JFJ1	Proteobacteria	Gammaproteobacteria	Enterobacterales	Enterobacteriaceae	Escherichia	Escherichia coli H386	P6009	Crohn's Disease	0.0312529
Crohn's Disease	MTG	frc	A0A377BTA6	Proteobacteria	Gammaproteobacteria	Enterobacterales	Enterobacteriaceae	Escherichia	Escherichia coli	P6009	Crohn's Disease	0.215036
Crohn's Disease	MTG	frc	A1ADQ1	Proteobacteria	Gammaproteobacteria	Enterobacterales	Enterobacteriaceae	Escherichia	Escherichia coli APEC O1	P6009	Crohn's Disease	0.0312529
Crohn's Disease	MTG	frc	A0A072MW66	Actinobacteria	Actinobacteria	Bifidobacteriales	Bifidobacteriaceae	Bifidobacterium	Bifidobacterium pseudocatenulatum IPLA36007	P6009	Crohn's Disease-nonL3	2.38426
Crohn's Disease	MTG	frc	A0A174BHB6	Actinobacteria	Actinobacteria	Bifidobacteriales	Bifidobacteriaceae	Bifidobacterium	Bifidobacterium pseudocatenulatum	P6009	Crohn's Disease-nonL3	0.204229
Crohn's Disease	MTG	frc	A0A1Q6EPI6	Actinobacteria	Actinobacteria	Bifidobacteriales	Bifidobacteriaceae	Bifidobacterium	Bifidobacterium sp. 56_9_plus	P6009	Crohn's Disease-nonL3	0.30438
Crohn's Disease	MTG	frc	A0A1X3JFJ1	Proteobacteria	Gammaproteobacteria	Enterobacterales	Enterobacteriaceae	Escherichia	Escherichia coli H386	P6009	Crohn's Disease-nonL3	0.0312529
Crohn's Disease	MTG	frc	A0A377BTA6	Proteobacteria	Gammaproteobacteria	Enterobacterales	Enterobacteriaceae	Escherichia	Escherichia coli	P6009	Crohn's Disease-nonL3	0.215036
Crohn's Disease	MTG	frc	A1ADQ1	Proteobacteria	Gammaproteobacteria	Enterobacterales	Enterobacteriaceae	Escherichia	Escherichia coli APEC O1	P6009	Crohn's Disease-nonL3	0.0312529
Crohn's Disease	MTG	frc	A0A062XDE4	Firmicutes	Bacilli	Lactobacillales	Lactobacillaceae	Lactobacillus	Lactobacillus animalis	P6010	Crohn's Disease	4.2774
Crohn's Disease	MTG	frc	A0A072MW66	Actinobacteria	Actinobacteria	Bifidobacteriales	Bifidobacteriaceae	Bifidobacterium	Bifidobacterium pseudocatenulatum IPLA36007	P6010	Crohn's Disease	0.517819
Crohn's Disease	MTG	frc	A0A073JPH8	Firmicutes	Bacilli	Lactobacillales	Lactobacillaceae	Lactobacillus	Lactobacillus reuteri	P6010	Crohn's Disease	0.180343
Crohn's Disease	MTG	frc	A0A081KVM2	Firmicutes	Bacilli	Lactobacillales	Lactobacillaceae	Lactobacillus	Lactobacillus reuteri	P6010	Crohn's Disease	0.0360686
Crohn's Disease	MTG	frc	A0A087ADU5	Actinobacteria	Actinobacteria	Bifidobacteriales	Bifidobacteriaceae	Bifidobacterium	Bifidobacterium choerinum	P6010	Crohn's Disease	0.395861
Crohn's Disease	MTG	frc	A0A087B567	Actinobacteria	Actinobacteria	Bifidobacteriales	Bifidobacteriaceae	Bifidobacterium	Bifidobacterium cuniculi	P6010	Crohn's Disease	0.0360686
Crohn's Disease	MTG	frc	A0A087QB11	Firmicutes	Bacilli	Lactobacillales	Lactobacillaceae	Lactobacillus	Lactobacillus gasseri SV-16A-US	P6010	Crohn's Disease	6.39843
Crohn's Disease	MTG	frc	A0A099YDY1	Firmicutes	Bacilli	Lactobacillales	Lactobacillaceae	Lactobacillus	Lactobacillus mucosae	P6010	Crohn's Disease	0.286608
Crohn's Disease	MTG	frc	A0A0A7I974	Actinobacteria	Actinobacteria	Bifidobacteriales	Bifidobacteriaceae	Bifidobacterium	Bifidobacterium pseudolongum PV8-2	P6010	Crohn's Disease	0.0359874
Crohn's Disease	MTG	frc	A0A0R1HAW1	Firmicutes	Bacilli	Lactobacillales	Lactobacillaceae	Lactobacillus	Lactobacillus amylovorus DSM 20531	P6010	Crohn's Disease	7.44939
Crohn's Disease	MTG	frc	A0A0R1PNQ4	Firmicutes	Bacilli	Lactobacillales	Lactobacillaceae	Lactobacillus	Lactobacillus kefiranofaciens subsp. kefirgranum D	P6010	Crohn's Disease	5.21817
Crohn's Disease	MTG	frc	A0A0R1UH43	Firmicutes	Bacilli	Lactobacillales	Lactobacillaceae	Lactobacillus	Lactobacillus kalixensis DSM 16043	P6010	Crohn's Disease	7.8822
Crohn's Disease	MTG	frc	A0A0R1ZZ35	Firmicutes	Bacilli	Lactobacillales	Lactobacillaceae	Lactobacillus	Lactobacillus animalis KCTC 3501 = DSM 20602	P6010	Crohn's Disease	0.282804
Crohn's Disease	MTG	frc	A0A0R2KS09	Firmicutes	Bacilli	Lactobacillales	Lactobacillaceae	Lactobacillus	Lactobacillus amylovorus DSM 16698	P6010	Crohn's Disease	0.536188
Crohn's Disease	MTG	frc	A0A179CRB0	Firmicutes	Bacilli	Lactobacillales	Lactobacillaceae	Lactobacillus	Lactobacillus aviarius	P6010	Crohn's Disease	0.463659
Crohn's Disease	MTG	frc	A0A1V3Y246	Firmicutes	Bacilli	Lactobacillales	Lactobacillaceae	Lactobacillus	Lactobacillus gasseri	P6010	Crohn's Disease	0.353504
Crohn's Disease	MTG	frc	A0A1V8Q5N2	Actinobacteria	Actinobacteria	Bifidobacteriales	Bifidobacteriaceae	Bifidobacterium	Bifidobacterium dentium	P6010	Crohn's Disease	2.52869
Crohn's Disease	MTG	frc	A0A2N5IVX1	Actinobacteria	Actinobacteria	Bifidobacteriales	Bifidobacteriaceae	Bifidobacterium	Bifidobacterium anseris	P6010	Crohn's Disease	0.0359874
Crohn's Disease	MTG	frc	A0A2Z6TDS6	Firmicutes	Bacilli	Lactobacillales	Lactobacillaceae	Lactobacillus	Lactobacillus rodentium	P6010	Crohn's Disease	0.0702347
Crohn's Disease	MTG	frc	A0A377BTA6	Proteobacteria	Gammaproteobacteria	Enterobacterales	Enterobacteriaceae	Escherichia	Escherichia coli	P6010	Crohn's Disease	9.54009
Crohn's Disease	MTG	frc	A1ADQ1	Proteobacteria	Gammaproteobacteria	Enterobacterales	Enterobacteriaceae	Escherichia	Escherichia coli APEC O1	P6010	Crohn's Disease	3.8439
Crohn's Disease	MTG	frc	B5YYX4	Proteobacteria	Gammaproteobacteria	Enterobacterales	Enterobacteriaceae	Escherichia	Escherichia coli O157:H7 str. EC4115	P6010	Crohn's Disease	0.96024
Crohn's Disease	MTG	frc	C7XLI6	Firmicutes	Bacilli	Lactobacillales	Lactobacillaceae	Lactobacillus	Lactobacillus crispatus 125-2-CHN	P6010	Crohn's Disease	2.64495
Crohn's Disease	MTG	frc	G1U9U4	Firmicutes	Bacilli	Lactobacillales	Lactobacillaceae	Lactobacillus	Lactobacillus acidophilus	P6010	Crohn's Disease	19.8613
Crohn's Disease	MTS	frc	A0A062XDE4	Firmicutes	Bacilli	Lactobacillales	Lactobacillaceae	Lactobacillus	Lactobacillus animalis	P6010	Crohn's Disease	0.480619
Crohn's Disease	MTS	frc	A0A087QB11	Firmicutes	Bacilli	Lactobacillales	Lactobacillaceae	Lactobacillus	Lactobacillus gasseri SV-16A-US	P6010	Crohn's Disease	1.08139
Crohn's Disease	MTS	frc	A0A0R1HAW1	Firmicutes	Bacilli	Lactobacillales	Lactobacillaceae	Lactobacillus	Lactobacillus amylovorus DSM 20531	P6010	Crohn's Disease	2.69104
Crohn's Disease	MTS	frc	A0A0R1UH43	Firmicutes	Bacilli	Lactobacillales	Lactobacillaceae	Lactobacillus	Lactobacillus kalixensis DSM 16043	P6010	Crohn's Disease	3.27315
Crohn's Disease	MTS	frc	A0A1V8Q5N2	Actinobacteria	Actinobacteria	Bifidobacteriales	Bifidobacteriaceae	Bifidobacterium	Bifidobacterium dentium	P6010	Crohn's Disease	0.124564
Crohn's Disease	MTS	frc	A0A377BTA6	Proteobacteria	Gammaproteobacteria	Enterobacterales	Enterobacteriaceae	Escherichia	Escherichia coli	P6010	Crohn's Disease	1.89863
Crohn's Disease	MTS	frc	G1U9U4	Firmicutes	Bacilli	Lactobacillales	Lactobacillaceae	Lactobacillus	Lactobacillus acidophilus	P6010	Crohn's Disease	15.7438
Crohn's Disease	MTG	frc	A0A062XDE4	Firmicutes	Bacilli	Lactobacillales	Lactobacillaceae	Lactobacillus	Lactobacillus animalis	P6010	Crohn's Disease-L3	4.2774
Crohn's Disease	MTG	frc	A0A072MW66	Actinobacteria	Actinobacteria	Bifidobacteriales	Bifidobacteriaceae	Bifidobacterium	Bifidobacterium pseudocatenulatum IPLA36007	P6010	Crohn's Disease-L3	0.517819
Crohn's Disease	MTG	frc	A0A073JPH8	Firmicutes	Bacilli	Lactobacillales	Lactobacillaceae	Lactobacillus	Lactobacillus reuteri	P6010	Crohn's Disease-L3	0.180343
Crohn's Disease	MTG	frc	A0A081KVM2	Firmicutes	Bacilli	Lactobacillales	Lactobacillaceae	Lactobacillus	Lactobacillus reuteri	P6010	Crohn's Disease-L3	0.0360686
Crohn's Disease	MTG	frc	A0A087ADU5	Actinobacteria	Actinobacteria	Bifidobacteriales	Bifidobacteriaceae	Bifidobacterium	Bifidobacterium choerinum	P6010	Crohn's Disease-L3	0.395861
Crohn's Disease	MTG	frc	A0A087B567	Actinobacteria	Actinobacteria	Bifidobacteriales	Bifidobacteriaceae	Bifidobacterium	Bifidobacterium cuniculi	P6010	Crohn's Disease-L3	0.0360686
Crohn's Disease	MTG	frc	A0A087QB11	Firmicutes	Bacilli	Lactobacillales	Lactobacillaceae	Lactobacillus	Lactobacillus gasseri SV-16A-US	P6010	Crohn's Disease-L3	6.39843
Crohn's Disease	MTG	frc	A0A099YDY1	Firmicutes	Bacilli	Lactobacillales	Lactobacillaceae	Lactobacillus	Lactobacillus mucosae	P6010	Crohn's Disease-L3	0.286608
Crohn's Disease	MTG	frc	A0A0A7I974	Actinobacteria	Actinobacteria	Bifidobacteriales	Bifidobacteriaceae	Bifidobacterium	Bifidobacterium pseudolongum PV8-2	P6010	Crohn's Disease-L3	0.0359874
Crohn's Disease	MTG	frc	A0A0R1HAW1	Firmicutes	Bacilli	Lactobacillales	Lactobacillaceae	Lactobacillus	Lactobacillus amylovorus DSM 20531	P6010	Crohn's Disease-L3	7.44939
Crohn's Disease	MTG	frc	A0A0R1PNQ4	Firmicutes	Bacilli	Lactobacillales	Lactobacillaceae	Lactobacillus	Lactobacillus kefiranofaciens subsp. kefirgranum D	P6010	Crohn's Disease-L3	5.21817
Crohn's Disease	MTG	frc	A0A0R1UH43	Firmicutes	Bacilli	Lactobacillales	Lactobacillaceae	Lactobacillus	Lactobacillus kalixensis DSM 16043	P6010	Crohn's Disease-L3	7.8822
Crohn's Disease	MTG	frc	A0A0R1ZZ35	Firmicutes	Bacilli	Lactobacillales	Lactobacillaceae	Lactobacillus	Lactobacillus animalis KCTC 3501 = DSM 20602	P6010	Crohn's Disease-L3	0.282804
Crohn's Disease	MTG	frc	A0A0R2KS09	Firmicutes	Bacilli	Lactobacillales	Lactobacillaceae	Lactobacillus	Lactobacillus amylovorus DSM 16698	P6010	Crohn's Disease-L3	0.536188
Crohn's Disease	MTG	frc	A0A179CRB0	Firmicutes	Bacilli	Lactobacillales	Lactobacillaceae	Lactobacillus	Lactobacillus aviarius	P6010	Crohn's Disease-L3	0.463659
Crohn's Disease	MTG	frc	A0A1V3Y246	Firmicutes	Bacilli	Lactobacillales	Lactobacillaceae	Lactobacillus	Lactobacillus gasseri	P6010	Crohn's Disease-L3	0.353504
Crohn's Disease	MTG	frc	A0A1V8Q5N2	Actinobacteria	Actinobacteria	Bifidobacteriales	Bifidobacteriaceae	Bifidobacterium	Bifidobacterium dentium	P6010	Crohn's Disease-L3	2.52869
Crohn's Disease	MTG	frc	A0A2N5IVX1	Actinobacteria	Actinobacteria	Bifidobacteriales	Bifidobacteriaceae	Bifidobacterium	Bifidobacterium anseris	P6010	Crohn's Disease-L3	0.0359874
Crohn's Disease	MTG	frc	A0A2Z6TDS6	Firmicutes	Bacilli	Lactobacillales	Lactobacillaceae	Lactobacillus	Lactobacillus rodentium	P6010	Crohn's Disease-L3	0.0702347
Crohn's Disease	MTG	frc	A0A377BTA6	Proteobacteria	Gammaproteobacteria	Enterobacterales	Enterobacteriaceae	Escherichia	Escherichia coli	P6010	Crohn's Disease-L3	9.54009
Crohn's Disease	MTG	frc	A1ADQ1	Proteobacteria	Gammaproteobacteria	Enterobacterales	Enterobacteriaceae	Escherichia	Escherichia coli APEC O1	P6010	Crohn's Disease-L3	3.8439
Crohn's Disease	MTG	frc	B5YYX4	Proteobacteria	Gammaproteobacteria	Enterobacterales	Enterobacteriaceae	Escherichia	Escherichia coli O157:H7 str. EC4115	P6010	Crohn's Disease-L3	0.96024
Crohn's Disease	MTG	frc	C7XLI6	Firmicutes	Bacilli	Lactobacillales	Lactobacillaceae	Lactobacillus	Lactobacillus crispatus 125-2-CHN	P6010	Crohn's Disease-L3	2.64495
Crohn's Disease	MTG	frc	G1U9U4	Firmicutes	Bacilli	Lactobacillales	Lactobacillaceae	Lactobacillus	Lactobacillus acidophilus	P6010	Crohn's Disease-L3	19.8613
Crohn's Disease	MTS	frc	A0A062XDE4	Firmicutes	Bacilli	Lactobacillales	Lactobacillaceae	Lactobacillus	Lactobacillus animalis	P6010	Crohn's Disease-L3	0.480619
Crohn's Disease	MTS	frc	A0A087QB11	Firmicutes	Bacilli	Lactobacillales	Lactobacillaceae	Lactobacillus	Lactobacillus gasseri SV-16A-US	P6010	Crohn's Disease-L3	1.08139
Crohn's Disease	MTS	frc	A0A0R1HAW1	Firmicutes	Bacilli	Lactobacillales	Lactobacillaceae	Lactobacillus	Lactobacillus amylovorus DSM 20531	P6010	Crohn's Disease-L3	2.69104
Crohn's Disease	MTS	frc	A0A0R1UH43	Firmicutes	Bacilli	Lactobacillales	Lactobacillaceae	Lactobacillus	Lactobacillus kalixensis DSM 16043	P6010	Crohn's Disease-L3	3.27315
Crohn's Disease	MTS	frc	A0A1V8Q5N2	Actinobacteria	Actinobacteria	Bifidobacteriales	Bifidobacteriaceae	Bifidobacterium	Bifidobacterium dentium	P6010	Crohn's Disease-L3	0.124564
Crohn's Disease	MTS	frc	A0A377BTA6	Proteobacteria	Gammaproteobacteria	Enterobacterales	Enterobacteriaceae	Escherichia	Escherichia coli	P6010	Crohn's Disease-L3	1.89863
Crohn's Disease	MTS	frc	G1U9U4	Firmicutes	Bacilli	Lactobacillales	Lactobacillaceae	Lactobacillus	Lactobacillus acidophilus	P6010	Crohn's Disease-L3	15.7438
Crohn's Disease	MTG	frc	A0A072MW66	Actinobacteria	Actinobacteria	Bifidobacteriales	Bifidobacteriaceae	Bifidobacterium	Bifidobacterium pseudocatenulatum IPLA36007	P6016	Crohn's Disease	0.0347734
Crohn's Disease	MTG	frc	A0A087ADU5	Actinobacteria	Actinobacteria	Bifidobacteriales	Bifidobacteriaceae	Bifidobacterium	Bifidobacterium choerinum	P6016	Crohn's Disease	0.121535
Crohn's Disease	MTG	frc	A0A377BTA6	Proteobacteria	Gammaproteobacteria	Enterobacterales	Enterobacteriaceae	Escherichia	Escherichia coli	P6016	Crohn's Disease	0.0462286
Crohn's Disease	MTG	frc	A1ADQ1	Proteobacteria	Gammaproteobacteria	Enterobacterales	Enterobacteriaceae	Escherichia	Escherichia coli APEC O1	P6016	Crohn's Disease	0.102051
Crohn's Disease	MTS	frc	A0A377BTA6	Proteobacteria	Gammaproteobacteria	Enterobacterales	Enterobacteriaceae	Escherichia	Escherichia coli	P6016	Crohn's Disease	0.100354
Crohn's Disease	MTG	frc	A0A072MW66	Actinobacteria	Actinobacteria	Bifidobacteriales	Bifidobacteriaceae	Bifidobacterium	Bifidobacterium pseudocatenulatum IPLA36007	P6016	Crohn's Disease-L3	0.0347734
Crohn's Disease	MTG	frc	A0A087ADU5	Actinobacteria	Actinobacteria	Bifidobacteriales	Bifidobacteriaceae	Bifidobacterium	Bifidobacterium choerinum	P6016	Crohn's Disease-L3	0.121535
Crohn's Disease	MTG	frc	A0A377BTA6	Proteobacteria	Gammaproteobacteria	Enterobacterales	Enterobacteriaceae	Escherichia	Escherichia coli	P6016	Crohn's Disease-L3	0.0462286
Crohn's Disease	MTG	frc	A1ADQ1	Proteobacteria	Gammaproteobacteria	Enterobacterales	Enterobacteriaceae	Escherichia	Escherichia coli APEC O1	P6016	Crohn's Disease-L3	0.102051
Crohn's Disease	MTS	frc	A0A377BTA6	Proteobacteria	Gammaproteobacteria	Enterobacterales	Enterobacteriaceae	Escherichia	Escherichia coli	P6016	Crohn's Disease-L3	0.100354
Crohn's Disease	MTG	frc	A0A016XI66	Proteobacteria	Betaproteobacteria	Burkholderiales	Comamonadaceae	Hylemonella	Hylemonella gracilis str. Niagara R	P6024	Crohn's Disease	0.244014
Crohn's Disease	MTG	frc	A0A024KXD2	Proteobacteria	Gammaproteobacteria	Enterobacterales	Enterobacteriaceae	Escherichia	Escherichia coli D6-113.11	P6024	Crohn's Disease	0.0823156
Crohn's Disease	MTG	frc	A0A072MW66	Actinobacteria	Actinobacteria	Bifidobacteriales	Bifidobacteriaceae	Bifidobacterium	Bifidobacterium pseudocatenulatum IPLA36007	P6024	Crohn's Disease	0.0792669
Crohn's Disease	MTG	frc	A0A087B567	Actinobacteria	Actinobacteria	Bifidobacteriales	Bifidobacteriaceae	Bifidobacterium	Bifidobacterium cuniculi	P6024	Crohn's Disease	0.0772986
Crohn's Disease	MTG	frc	A0A140NM80	Proteobacteria	Gammaproteobacteria	Enterobacterales	Morganellaceae	Providencia	Providencia stuartii MRSN 2154	P6024	Crohn's Disease	0.0431291
Crohn's Disease	MTG	frc	A0A1J0EDS7	Proteobacteria	Gammaproteobacteria	Enterobacterales	Morganellaceae	Providencia	Providencia rettgeri	P6024	Crohn's Disease	0.044948
Crohn's Disease	MTG	frc	A0A1Q6B5H0	Proteobacteria	Gammaproteobacteria	Enterobacterales	Enterobacteriaceae	Escherichia	Escherichia coli	P6024	Crohn's Disease	0.0433365
Crohn's Disease	MTG	frc	A0A1V8Q5N2	Actinobacteria	Actinobacteria	Bifidobacteriales	Bifidobacteriaceae	Bifidobacterium	Bifidobacterium dentium	P6024	Crohn's Disease	0.551856
Crohn's Disease	MTG	frc	A0A2W6PGI2	Proteobacteria	Gammaproteobacteria	Enterobacterales	Enterobacteriaceae	Escherichia	Escherichia coli	P6024	Crohn's Disease	0.0451641
Crohn's Disease	MTG	frc	A0A377BTA6	Proteobacteria	Gammaproteobacteria	Enterobacterales	Enterobacteriaceae	Escherichia	Escherichia coli	P6024	Crohn's Disease	3.12758
Crohn's Disease	MTG	frc	A1ADQ1	Proteobacteria	Gammaproteobacteria	Enterobacterales	Enterobacteriaceae	Escherichia	Escherichia coli APEC O1	P6024	Crohn's Disease	8.39979
Crohn's Disease	MTG	frc	B2TWX3	Proteobacteria	Gammaproteobacteria	Enterobacterales	Enterobacteriaceae	Shigella	Shigella boydii CDC 3083-94	P6024	Crohn's Disease	0.0823156
Crohn's Disease	MTG	frc	B5YYX4	Proteobacteria	Gammaproteobacteria	Enterobacterales	Enterobacteriaceae	Escherichia	Escherichia coli O157:H7 str. EC4115	P6024	Crohn's Disease	0.327745
Crohn's Disease	MTG	frc	B7MY33	Proteobacteria	Gammaproteobacteria	Enterobacterales	Enterobacteriaceae	Escherichia	Escherichia coli ED1a	P6024	Crohn's Disease	0.0823156
Crohn's Disease	MTG	frc	V0UR98	Proteobacteria	Gammaproteobacteria	Enterobacterales	Enterobacteriaceae	Escherichia	Escherichia coli 908519	P6024	Crohn's Disease	0.478418
Crohn's Disease	MTS	frc	A0A377BTA6	Proteobacteria	Gammaproteobacteria	Enterobacterales	Enterobacteriaceae	Escherichia	Escherichia coli	P6024	Crohn's Disease	1.22867
Crohn's Disease	MTS	frc	A1ADQ1	Proteobacteria	Gammaproteobacteria	Enterobacterales	Enterobacteriaceae	Escherichia	Escherichia coli APEC O1	P6024	Crohn's Disease	0.424392
Crohn's Disease	MTG	frc	A0A016XI66	Proteobacteria	Betaproteobacteria	Burkholderiales	Comamonadaceae	Hylemonella	Hylemonella gracilis str. Niagara R	P6024	Crohn's Disease-L3	0.244014
Crohn's Disease	MTG	frc	A0A024KXD2	Proteobacteria	Gammaproteobacteria	Enterobacterales	Enterobacteriaceae	Escherichia	Escherichia coli D6-113.11	P6024	Crohn's Disease-L3	0.0823156
Crohn's Disease	MTG	frc	A0A072MW66	Actinobacteria	Actinobacteria	Bifidobacteriales	Bifidobacteriaceae	Bifidobacterium	Bifidobacterium pseudocatenulatum IPLA36007	P6024	Crohn's Disease-L3	0.0792669
Crohn's Disease	MTG	frc	A0A087B567	Actinobacteria	Actinobacteria	Bifidobacteriales	Bifidobacteriaceae	Bifidobacterium	Bifidobacterium cuniculi	P6024	Crohn's Disease-L3	0.0772986
Crohn's Disease	MTG	frc	A0A140NM80	Proteobacteria	Gammaproteobacteria	Enterobacterales	Morganellaceae	Providencia	Providencia stuartii MRSN 2154	P6024	Crohn's Disease-L3	0.0431291
Crohn's Disease	MTG	frc	A0A1J0EDS7	Proteobacteria	Gammaproteobacteria	Enterobacterales	Morganellaceae	Providencia	Providencia rettgeri	P6024	Crohn's Disease-L3	0.044948
Crohn's Disease	MTG	frc	A0A1Q6B5H0	Proteobacteria	Gammaproteobacteria	Enterobacterales	Enterobacteriaceae	Escherichia	Escherichia coli	P6024	Crohn's Disease-L3	0.0433365
Crohn's Disease	MTG	frc	A0A1V8Q5N2	Actinobacteria	Actinobacteria	Bifidobacteriales	Bifidobacteriaceae	Bifidobacterium	Bifidobacterium dentium	P6024	Crohn's Disease-L3	0.551856
Crohn's Disease	MTG	frc	A0A2W6PGI2	Proteobacteria	Gammaproteobacteria	Enterobacterales	Enterobacteriaceae	Escherichia	Escherichia coli	P6024	Crohn's Disease-L3	0.0451641
Crohn's Disease	MTG	frc	A0A377BTA6	Proteobacteria	Gammaproteobacteria	Enterobacterales	Enterobacteriaceae	Escherichia	Escherichia coli	P6024	Crohn's Disease-L3	3.12758
Crohn's Disease	MTG	frc	A1ADQ1	Proteobacteria	Gammaproteobacteria	Enterobacterales	Enterobacteriaceae	Escherichia	Escherichia coli APEC O1	P6024	Crohn's Disease-L3	8.39979
Crohn's Disease	MTG	frc	B2TWX3	Proteobacteria	Gammaproteobacteria	Enterobacterales	Enterobacteriaceae	Shigella	Shigella boydii CDC 3083-94	P6024	Crohn's Disease-L3	0.0823156
Crohn's Disease	MTG	frc	B5YYX4	Proteobacteria	Gammaproteobacteria	Enterobacterales	Enterobacteriaceae	Escherichia	Escherichia coli O157:H7 str. EC4115	P6024	Crohn's Disease-L3	0.327745
Crohn's Disease	MTG	frc	B7MY33	Proteobacteria	Gammaproteobacteria	Enterobacterales	Enterobacteriaceae	Escherichia	Escherichia coli ED1a	P6024	Crohn's Disease-L3	0.0823156
Crohn's Disease	MTG	frc	V0UR98	Proteobacteria	Gammaproteobacteria	Enterobacterales	Enterobacteriaceae	Escherichia	Escherichia coli 908519	P6024	Crohn's Disease-L3	0.478418
Crohn's Disease	MTS	frc	A0A377BTA6	Proteobacteria	Gammaproteobacteria	Enterobacterales	Enterobacteriaceae	Escherichia	Escherichia coli	P6024	Crohn's Disease-L3	1.22867
Crohn's Disease	MTS	frc	A1ADQ1	Proteobacteria	Gammaproteobacteria	Enterobacterales	Enterobacteriaceae	Escherichia	Escherichia coli APEC O1	P6024	Crohn's Disease-L3	0.424392
Crohn's Disease	MTG	frc	A0A016XI66	Proteobacteria	Betaproteobacteria	Burkholderiales	Comamonadaceae	Hylemonella	Hylemonella gracilis str. Niagara R	P6028	Crohn's Disease	0.0984058
Crohn's Disease	MTG	frc	A0A062XDE4	Firmicutes	Bacilli	Lactobacillales	Lactobacillaceae	Lactobacillus	Lactobacillus animalis	P6028	Crohn's Disease	4.78132
Crohn's Disease	MTG	frc	A0A070SKW5	Proteobacteria	Gammaproteobacteria	Enterobacterales	Enterobacteriaceae	Escherichia	Escherichia coli 2-210-07_S3_C3	P6028	Crohn's Disease	0.0264214
Crohn's Disease	MTG	frc	A0A071LN49	Proteobacteria	Gammaproteobacteria	Enterobacterales	Enterobacteriaceae	Mangrovibacter	Mangrovibacter sp. MFB070	P6028	Crohn's Disease	0.0731097
Crohn's Disease	MTG	frc	A0A072MW66	Actinobacteria	Actinobacteria	Bifidobacteriales	Bifidobacteriaceae	Bifidobacterium	Bifidobacterium pseudocatenulatum IPLA36007	P6028	Crohn's Disease	1.71615
Crohn's Disease	MTG	frc	A0A073JPH8	Firmicutes	Bacilli	Lactobacillales	Lactobacillaceae	Lactobacillus	Lactobacillus reuteri	P6028	Crohn's Disease	0.302517
Crohn's Disease	MTG	frc	A0A081KVM2	Firmicutes	Bacilli	Lactobacillales	Lactobacillaceae	Lactobacillus	Lactobacillus reuteri	P6028	Crohn's Disease	0.0291555
Crohn's Disease	MTG	frc	A0A087ADU5	Actinobacteria	Actinobacteria	Bifidobacteriales	Bifidobacteriaceae	Bifidobacterium	Bifidobacterium choerinum	P6028	Crohn's Disease	1.01455
Crohn's Disease	MTG	frc	A0A087B567	Actinobacteria	Actinobacteria	Bifidobacteriales	Bifidobacteriaceae	Bifidobacterium	Bifidobacterium cuniculi	P6028	Crohn's Disease	0.213709
Crohn's Disease	MTG	frc	A0A087BE81	Actinobacteria	Actinobacteria	Bifidobacteriales	Bifidobacteriaceae	Bifidobacterium	Bifidobacterium magnum	P6028	Crohn's Disease	0.356747
Crohn's Disease	MTG	frc	A0A087QB11	Firmicutes	Bacilli	Lactobacillales	Lactobacillaceae	Lactobacillus	Lactobacillus gasseri SV-16A-US	P6028	Crohn's Disease	11.0665
Crohn's Disease	MTG	frc	A0A099YDY1	Firmicutes	Bacilli	Lactobacillales	Lactobacillaceae	Lactobacillus	Lactobacillus mucosae	P6028	Crohn's Disease	0.15105
Crohn's Disease	MTG	frc	A0A0A7I974	Actinobacteria	Actinobacteria	Bifidobacteriales	Bifidobacteriaceae	Bifidobacterium	Bifidobacterium pseudolongum PV8-2	P6028	Crohn's Disease	0.0850405
Crohn's Disease	MTG	frc	A0A0E1SU03	Proteobacteria	Gammaproteobacteria	Enterobacterales	Enterobacteriaceae	Escherichia	Escherichia coli 53638	P6028	Crohn's Disease	0.0248971
Crohn's Disease	MTG	frc	A0A0L7ANW7	Proteobacteria	Gammaproteobacteria	Enterobacterales	Enterobacteriaceae	Escherichia	Escherichia coli	P6028	Crohn's Disease	0.0771262
Crohn's Disease	MTG	frc	A0A0R1HAW1	Firmicutes	Bacilli	Lactobacillales	Lactobacillaceae	Lactobacillus	Lactobacillus amylovorus DSM 20531	P6028	Crohn's Disease	8.00283
Crohn's Disease	MTG	frc	A0A0R1PNQ4	Firmicutes	Bacilli	Lactobacillales	Lactobacillaceae	Lactobacillus	Lactobacillus kefiranofaciens subsp. kefirgranum D	P6028	Crohn's Disease	7.45116
Crohn's Disease	MTG	frc	A0A0R1UH43	Firmicutes	Bacilli	Lactobacillales	Lactobacillaceae	Lactobacillus	Lactobacillus kalixensis DSM 16043	P6028	Crohn's Disease	5.34727
Crohn's Disease	MTG	frc	A0A0R1UNQ7	Firmicutes	Bacilli	Lactobacillales	Lactobacillaceae	Lactobacillus	Lactobacillus equigenerosi DSM 18793 = JCM 14505	P6028	Crohn's Disease	0.0581798
Crohn's Disease	MTG	frc	A0A0R1XV35	Firmicutes	Bacilli	Lactobacillales	Lactobacillaceae	Lactobacillus	Lactobacillus intestinalis DSM 6629	P6028	Crohn's Disease	0.0357288
Crohn's Disease	MTG	frc	A0A0R1YA23	Firmicutes	Bacilli	Lactobacillales	Lactobacillaceae	Lactobacillus	Lactobacillus aviarius subsp. aviarius DSM 20655	P6028	Crohn's Disease	0.0611495
Crohn's Disease	MTG	frc	A0A0R1ZZ35	Firmicutes	Bacilli	Lactobacillales	Lactobacillaceae	Lactobacillus	Lactobacillus animalis KCTC 3501 = DSM 20602	P6028	Crohn's Disease	0.828869
Crohn's Disease	MTG	frc	A0A0R2KS09	Firmicutes	Bacilli	Lactobacillales	Lactobacillaceae	Lactobacillus	Lactobacillus amylovorus DSM 16698	P6028	Crohn's Disease	0.531819
Crohn's Disease	MTG	frc	A0A174BHB6	Actinobacteria	Actinobacteria	Bifidobacteriales	Bifidobacteriaceae	Bifidobacterium	Bifidobacterium pseudocatenulatum	P6028	Crohn's Disease	0.0443866
Crohn's Disease	MTG	frc	A0A179CRB0	Firmicutes	Bacilli	Lactobacillales	Lactobacillaceae	Lactobacillus	Lactobacillus aviarius	P6028	Crohn's Disease	0.0947101
Crohn's Disease	MTG	frc	A0A1C7CW93	Proteobacteria	Gammaproteobacteria	Enterobacterales	Enterobacteriaceae	Escherichia	Escherichia coli	P6028	Crohn's Disease	0.024778
Crohn's Disease	MTG	frc	A0A1V3Y246	Firmicutes	Bacilli	Lactobacillales	Lactobacillaceae	Lactobacillus	Lactobacillus gasseri	P6028	Crohn's Disease	1.76901
Crohn's Disease	MTG	frc	A0A1V8Q5N2	Actinobacteria	Actinobacteria	Bifidobacteriales	Bifidobacteriaceae	Bifidobacterium	Bifidobacterium dentium	P6028	Crohn's Disease	6.78838
Crohn's Disease	MTG	frc	A0A1X0XWW8	Actinobacteria	Actinobacteria	Corynebacteriales	Mycobacteriaceae	Mycobacterium	Mycobacterium simiae	P6028	Crohn's Disease	0.024778
Crohn's Disease	MTG	frc	A0A1X3KZX2	Proteobacteria	Gammaproteobacteria	Enterobacterales	Enterobacteriaceae	Escherichia	Escherichia coli H420	P6028	Crohn's Disease	0.0248971
Crohn's Disease	MTG	frc	A0A1Y0E341	Firmicutes	Bacilli	Lactobacillales	Lactobacillaceae	Lactobacillus	Lactobacillus gasseri	P6028	Crohn's Disease	0.84277
Crohn's Disease	MTG	frc	A0A2N5IVX1	Actinobacteria	Actinobacteria	Bifidobacteriales	Bifidobacteriaceae	Bifidobacterium	Bifidobacterium anseris	P6028	Crohn's Disease	0.108394
Crohn's Disease	MTG	frc	A0A2X5G0L0	Proteobacteria	Gammaproteobacteria	Enterobacterales	Enterobacteriaceae	Escherichia	Escherichia coli	P6028	Crohn's Disease	0.0272558
Crohn's Disease	MTG	frc	A0A2Z6TDS6	Firmicutes	Bacilli	Lactobacillales	Lactobacillaceae	Lactobacillus	Lactobacillus rodentium	P6028	Crohn's Disease	0.0369564
Crohn's Disease	MTG	frc	A0A377BTA6	Proteobacteria	Gammaproteobacteria	Enterobacterales	Enterobacteriaceae	Escherichia	Escherichia coli	P6028	Crohn's Disease	38.895
Crohn's Disease	MTG	frc	A1ADQ1	Proteobacteria	Gammaproteobacteria	Enterobacterales	Enterobacteriaceae	Escherichia	Escherichia coli APEC O1	P6028	Crohn's Disease	23.4651
Crohn's Disease	MTG	frc	A6SUZ3	Proteobacteria	Betaproteobacteria	Burkholderiales	Oxalobacteraceae	Janthinobacterium	Janthinobacterium sp. Marseille	P6028	Crohn's Disease	0.076574
Crohn's Disease	MTG	frc	B5YYX4	Proteobacteria	Gammaproteobacteria	Enterobacterales	Enterobacteriaceae	Escherichia	Escherichia coli O157:H7 str. EC4115	P6028	Crohn's Disease	0.904251
Crohn's Disease	MTG	frc	C7XLI6	Firmicutes	Bacilli	Lactobacillales	Lactobacillaceae	Lactobacillus	Lactobacillus crispatus 125-2-CHN	P6028	Crohn's Disease	0.688201
Crohn's Disease	MTG	frc	G1U9U4	Firmicutes	Bacilli	Lactobacillales	Lactobacillaceae	Lactobacillus	Lactobacillus acidophilus	P6028	Crohn's Disease	39.234
Crohn's Disease	MTG	frc	Q8FFE8	Proteobacteria	Gammaproteobacteria	Enterobacterales	Enterobacteriaceae	Escherichia	Escherichia coli CFT073	P6028	Crohn's Disease	0.0248971
Crohn's Disease	MTS	frc	A0A062XDE4	Firmicutes	Bacilli	Lactobacillales	Lactobacillaceae	Lactobacillus	Lactobacillus animalis	P6028	Crohn's Disease	0.299528
Crohn's Disease	MTS	frc	A0A072MW66	Actinobacteria	Actinobacteria	Bifidobacteriales	Bifidobacteriaceae	Bifidobacterium	Bifidobacterium pseudocatenulatum IPLA36007	P6028	Crohn's Disease	0.174955
Crohn's Disease	MTS	frc	A0A073JPH8	Firmicutes	Bacilli	Lactobacillales	Lactobacillaceae	Lactobacillus	Lactobacillus reuteri	P6028	Crohn's Disease	0.0764034
Crohn's Disease	MTS	frc	A0A087QB11	Firmicutes	Bacilli	Lactobacillales	Lactobacillaceae	Lactobacillus	Lactobacillus gasseri SV-16A-US	P6028	Crohn's Disease	1.44956
Crohn's Disease	MTS	frc	A0A0R1HAW1	Firmicutes	Bacilli	Lactobacillales	Lactobacillaceae	Lactobacillus	Lactobacillus amylovorus DSM 20531	P6028	Crohn's Disease	1.36998
Crohn's Disease	MTS	frc	A0A0R1UH43	Firmicutes	Bacilli	Lactobacillales	Lactobacillaceae	Lactobacillus	Lactobacillus kalixensis DSM 16043	P6028	Crohn's Disease	1.83266
Crohn's Disease	MTS	frc	A0A377BTA6	Proteobacteria	Gammaproteobacteria	Enterobacterales	Enterobacteriaceae	Escherichia	Escherichia coli	P6028	Crohn's Disease	3.8253
Crohn's Disease	MTS	frc	A1ADQ1	Proteobacteria	Gammaproteobacteria	Enterobacterales	Enterobacteriaceae	Escherichia	Escherichia coli APEC O1	P6028	Crohn's Disease	0.0813622
Crohn's Disease	MTS	frc	C7XLI6	Firmicutes	Bacilli	Lactobacillales	Lactobacillaceae	Lactobacillus	Lactobacillus crispatus 125-2-CHN	P6028	Crohn's Disease	0.1535
Crohn's Disease	MTS	frc	G1U9U4	Firmicutes	Bacilli	Lactobacillales	Lactobacillaceae	Lactobacillus	Lactobacillus acidophilus	P6028	Crohn's Disease	5.58419
Crohn's Disease	MTG	frc	A0A016XI66	Proteobacteria	Betaproteobacteria	Burkholderiales	Comamonadaceae	Hylemonella	Hylemonella gracilis str. Niagara R	P6028	Crohn's Disease-nonL3	0.0984058
Crohn's Disease	MTG	frc	A0A062XDE4	Firmicutes	Bacilli	Lactobacillales	Lactobacillaceae	Lactobacillus	Lactobacillus animalis	P6028	Crohn's Disease-nonL3	4.78132
Crohn's Disease	MTG	frc	A0A070SKW5	Proteobacteria	Gammaproteobacteria	Enterobacterales	Enterobacteriaceae	Escherichia	Escherichia coli 2-210-07_S3_C3	P6028	Crohn's Disease-nonL3	0.0264214
Crohn's Disease	MTG	frc	A0A071LN49	Proteobacteria	Gammaproteobacteria	Enterobacterales	Enterobacteriaceae	Mangrovibacter	Mangrovibacter sp. MFB070	P6028	Crohn's Disease-nonL3	0.0731097
Crohn's Disease	MTG	frc	A0A072MW66	Actinobacteria	Actinobacteria	Bifidobacteriales	Bifidobacteriaceae	Bifidobacterium	Bifidobacterium pseudocatenulatum IPLA36007	P6028	Crohn's Disease-nonL3	1.71615
Crohn's Disease	MTG	frc	A0A073JPH8	Firmicutes	Bacilli	Lactobacillales	Lactobacillaceae	Lactobacillus	Lactobacillus reuteri	P6028	Crohn's Disease-nonL3	0.302517
Crohn's Disease	MTG	frc	A0A081KVM2	Firmicutes	Bacilli	Lactobacillales	Lactobacillaceae	Lactobacillus	Lactobacillus reuteri	P6028	Crohn's Disease-nonL3	0.0291555
Crohn's Disease	MTG	frc	A0A087ADU5	Actinobacteria	Actinobacteria	Bifidobacteriales	Bifidobacteriaceae	Bifidobacterium	Bifidobacterium choerinum	P6028	Crohn's Disease-nonL3	1.01455
Crohn's Disease	MTG	frc	A0A087B567	Actinobacteria	Actinobacteria	Bifidobacteriales	Bifidobacteriaceae	Bifidobacterium	Bifidobacterium cuniculi	P6028	Crohn's Disease-nonL3	0.213709
Crohn's Disease	MTG	frc	A0A087BE81	Actinobacteria	Actinobacteria	Bifidobacteriales	Bifidobacteriaceae	Bifidobacterium	Bifidobacterium magnum	P6028	Crohn's Disease-nonL3	0.356747
Crohn's Disease	MTG	frc	A0A087QB11	Firmicutes	Bacilli	Lactobacillales	Lactobacillaceae	Lactobacillus	Lactobacillus gasseri SV-16A-US	P6028	Crohn's Disease-nonL3	11.0665
Crohn's Disease	MTG	frc	A0A099YDY1	Firmicutes	Bacilli	Lactobacillales	Lactobacillaceae	Lactobacillus	Lactobacillus mucosae	P6028	Crohn's Disease-nonL3	0.15105
Crohn's Disease	MTG	frc	A0A0A7I974	Actinobacteria	Actinobacteria	Bifidobacteriales	Bifidobacteriaceae	Bifidobacterium	Bifidobacterium pseudolongum PV8-2	P6028	Crohn's Disease-nonL3	0.0850405
Crohn's Disease	MTG	frc	A0A0E1SU03	Proteobacteria	Gammaproteobacteria	Enterobacterales	Enterobacteriaceae	Escherichia	Escherichia coli 53638	P6028	Crohn's Disease-nonL3	0.0248971
Crohn's Disease	MTG	frc	A0A0L7ANW7	Proteobacteria	Gammaproteobacteria	Enterobacterales	Enterobacteriaceae	Escherichia	Escherichia coli	P6028	Crohn's Disease-nonL3	0.0771262
Crohn's Disease	MTG	frc	A0A0R1HAW1	Firmicutes	Bacilli	Lactobacillales	Lactobacillaceae	Lactobacillus	Lactobacillus amylovorus DSM 20531	P6028	Crohn's Disease-nonL3	8.00283
Crohn's Disease	MTG	frc	A0A0R1PNQ4	Firmicutes	Bacilli	Lactobacillales	Lactobacillaceae	Lactobacillus	Lactobacillus kefiranofaciens subsp. kefirgranum D	P6028	Crohn's Disease-nonL3	7.45116
Crohn's Disease	MTG	frc	A0A0R1UH43	Firmicutes	Bacilli	Lactobacillales	Lactobacillaceae	Lactobacillus	Lactobacillus kalixensis DSM 16043	P6028	Crohn's Disease-nonL3	5.34727
Crohn's Disease	MTG	frc	A0A0R1UNQ7	Firmicutes	Bacilli	Lactobacillales	Lactobacillaceae	Lactobacillus	Lactobacillus equigenerosi DSM 18793 = JCM 14505	P6028	Crohn's Disease-nonL3	0.0581798
Crohn's Disease	MTG	frc	A0A0R1XV35	Firmicutes	Bacilli	Lactobacillales	Lactobacillaceae	Lactobacillus	Lactobacillus intestinalis DSM 6629	P6028	Crohn's Disease-nonL3	0.0357288
Crohn's Disease	MTG	frc	A0A0R1YA23	Firmicutes	Bacilli	Lactobacillales	Lactobacillaceae	Lactobacillus	Lactobacillus aviarius subsp. aviarius DSM 20655	P6028	Crohn's Disease-nonL3	0.0611495
Crohn's Disease	MTG	frc	A0A0R1ZZ35	Firmicutes	Bacilli	Lactobacillales	Lactobacillaceae	Lactobacillus	Lactobacillus animalis KCTC 3501 = DSM 20602	P6028	Crohn's Disease-nonL3	0.828869
Crohn's Disease	MTG	frc	A0A0R2KS09	Firmicutes	Bacilli	Lactobacillales	Lactobacillaceae	Lactobacillus	Lactobacillus amylovorus DSM 16698	P6028	Crohn's Disease-nonL3	0.531819
Crohn's Disease	MTG	frc	A0A174BHB6	Actinobacteria	Actinobacteria	Bifidobacteriales	Bifidobacteriaceae	Bifidobacterium	Bifidobacterium pseudocatenulatum	P6028	Crohn's Disease-nonL3	0.0443866
Crohn's Disease	MTG	frc	A0A179CRB0	Firmicutes	Bacilli	Lactobacillales	Lactobacillaceae	Lactobacillus	Lactobacillus aviarius	P6028	Crohn's Disease-nonL3	0.0947101
Crohn's Disease	MTG	frc	A0A1C7CW93	Proteobacteria	Gammaproteobacteria	Enterobacterales	Enterobacteriaceae	Escherichia	Escherichia coli	P6028	Crohn's Disease-nonL3	0.024778
Crohn's Disease	MTG	frc	A0A1V3Y246	Firmicutes	Bacilli	Lactobacillales	Lactobacillaceae	Lactobacillus	Lactobacillus gasseri	P6028	Crohn's Disease-nonL3	1.76901
Crohn's Disease	MTG	frc	A0A1V8Q5N2	Actinobacteria	Actinobacteria	Bifidobacteriales	Bifidobacteriaceae	Bifidobacterium	Bifidobacterium dentium	P6028	Crohn's Disease-nonL3	6.78838
Crohn's Disease	MTG	frc	A0A1X0XWW8	Actinobacteria	Actinobacteria	Corynebacteriales	Mycobacteriaceae	Mycobacterium	Mycobacterium simiae	P6028	Crohn's Disease-nonL3	0.024778
Crohn's Disease	MTG	frc	A0A1X3KZX2	Proteobacteria	Gammaproteobacteria	Enterobacterales	Enterobacteriaceae	Escherichia	Escherichia coli H420	P6028	Crohn's Disease-nonL3	0.0248971
Crohn's Disease	MTG	frc	A0A1Y0E341	Firmicutes	Bacilli	Lactobacillales	Lactobacillaceae	Lactobacillus	Lactobacillus gasseri	P6028	Crohn's Disease-nonL3	0.84277
Crohn's Disease	MTG	frc	A0A2N5IVX1	Actinobacteria	Actinobacteria	Bifidobacteriales	Bifidobacteriaceae	Bifidobacterium	Bifidobacterium anseris	P6028	Crohn's Disease-nonL3	0.108394
Crohn's Disease	MTG	frc	A0A2X5G0L0	Proteobacteria	Gammaproteobacteria	Enterobacterales	Enterobacteriaceae	Escherichia	Escherichia coli	P6028	Crohn's Disease-nonL3	0.0272558
Crohn's Disease	MTG	frc	A0A2Z6TDS6	Firmicutes	Bacilli	Lactobacillales	Lactobacillaceae	Lactobacillus	Lactobacillus rodentium	P6028	Crohn's Disease-nonL3	0.0369564
Crohn's Disease	MTG	frc	A0A377BTA6	Proteobacteria	Gammaproteobacteria	Enterobacterales	Enterobacteriaceae	Escherichia	Escherichia coli	P6028	Crohn's Disease-nonL3	38.895
Crohn's Disease	MTG	frc	A1ADQ1	Proteobacteria	Gammaproteobacteria	Enterobacterales	Enterobacteriaceae	Escherichia	Escherichia coli APEC O1	P6028	Crohn's Disease-nonL3	23.4651
Crohn's Disease	MTG	frc	A6SUZ3	Proteobacteria	Betaproteobacteria	Burkholderiales	Oxalobacteraceae	Janthinobacterium	Janthinobacterium sp. Marseille	P6028	Crohn's Disease-nonL3	0.076574
Crohn's Disease	MTG	frc	B5YYX4	Proteobacteria	Gammaproteobacteria	Enterobacterales	Enterobacteriaceae	Escherichia	Escherichia coli O157:H7 str. EC4115	P6028	Crohn's Disease-nonL3	0.904251
Crohn's Disease	MTG	frc	C7XLI6	Firmicutes	Bacilli	Lactobacillales	Lactobacillaceae	Lactobacillus	Lactobacillus crispatus 125-2-CHN	P6028	Crohn's Disease-nonL3	0.688201
Crohn's Disease	MTG	frc	G1U9U4	Firmicutes	Bacilli	Lactobacillales	Lactobacillaceae	Lactobacillus	Lactobacillus acidophilus	P6028	Crohn's Disease-nonL3	39.234
Crohn's Disease	MTG	frc	Q8FFE8	Proteobacteria	Gammaproteobacteria	Enterobacterales	Enterobacteriaceae	Escherichia	Escherichia coli CFT073	P6028	Crohn's Disease-nonL3	0.0248971
Crohn's Disease	MTS	frc	A0A062XDE4	Firmicutes	Bacilli	Lactobacillales	Lactobacillaceae	Lactobacillus	Lactobacillus animalis	P6028	Crohn's Disease-nonL3	0.299528
Crohn's Disease	MTS	frc	A0A072MW66	Actinobacteria	Actinobacteria	Bifidobacteriales	Bifidobacteriaceae	Bifidobacterium	Bifidobacterium pseudocatenulatum IPLA36007	P6028	Crohn's Disease-nonL3	0.174955
Crohn's Disease	MTS	frc	A0A073JPH8	Firmicutes	Bacilli	Lactobacillales	Lactobacillaceae	Lactobacillus	Lactobacillus reuteri	P6028	Crohn's Disease-nonL3	0.0764034
Crohn's Disease	MTS	frc	A0A087QB11	Firmicutes	Bacilli	Lactobacillales	Lactobacillaceae	Lactobacillus	Lactobacillus gasseri SV-16A-US	P6028	Crohn's Disease-nonL3	1.44956
Crohn's Disease	MTS	frc	A0A0R1HAW1	Firmicutes	Bacilli	Lactobacillales	Lactobacillaceae	Lactobacillus	Lactobacillus amylovorus DSM 20531	P6028	Crohn's Disease-nonL3	1.36998
Crohn's Disease	MTS	frc	A0A0R1UH43	Firmicutes	Bacilli	Lactobacillales	Lactobacillaceae	Lactobacillus	Lactobacillus kalixensis DSM 16043	P6028	Crohn's Disease-nonL3	1.83266
Crohn's Disease	MTS	frc	A0A377BTA6	Proteobacteria	Gammaproteobacteria	Enterobacterales	Enterobacteriaceae	Escherichia	Escherichia coli	P6028	Crohn's Disease-nonL3	3.8253
Crohn's Disease	MTS	frc	A1ADQ1	Proteobacteria	Gammaproteobacteria	Enterobacterales	Enterobacteriaceae	Escherichia	Escherichia coli APEC O1	P6028	Crohn's Disease-nonL3	0.0813622
Crohn's Disease	MTS	frc	C7XLI6	Firmicutes	Bacilli	Lactobacillales	Lactobacillaceae	Lactobacillus	Lactobacillus crispatus 125-2-CHN	P6028	Crohn's Disease-nonL3	0.1535
Crohn's Disease	MTS	frc	G1U9U4	Firmicutes	Bacilli	Lactobacillales	Lactobacillaceae	Lactobacillus	Lactobacillus acidophilus	P6028	Crohn's Disease-nonL3	5.58419
Crohn's Disease	MTG	frc	A1ADQ1	Proteobacteria	Gammaproteobacteria	Enterobacterales	Enterobacteriaceae	Escherichia	Escherichia coli APEC O1	P6033	Crohn's Disease	0.103822
Crohn's Disease	MTG	frc	A1ADQ1	Proteobacteria	Gammaproteobacteria	Enterobacterales	Enterobacteriaceae	Escherichia	Escherichia coli APEC O1	P6033	Crohn's Disease-L3	0.103822
Crohn's Disease	MTG	frc	A0A072MW66	Actinobacteria	Actinobacteria	Bifidobacteriales	Bifidobacteriaceae	Bifidobacterium	Bifidobacterium pseudocatenulatum IPLA36007	P6037	Crohn's Disease	0.0326265
Crohn's Disease	MTG	frc	A0A1V8Q5N2	Actinobacteria	Actinobacteria	Bifidobacteriales	Bifidobacteriaceae	Bifidobacterium	Bifidobacterium dentium	P6037	Crohn's Disease	0.0323272
Crohn's Disease	MTG	frc	A0A377BTA6	Proteobacteria	Gammaproteobacteria	Enterobacterales	Enterobacteriaceae	Escherichia	Escherichia coli	P6037	Crohn's Disease	0.512499
Crohn's Disease	MTG	frc	A1ADQ1	Proteobacteria	Gammaproteobacteria	Enterobacterales	Enterobacteriaceae	Escherichia	Escherichia coli APEC O1	P6037	Crohn's Disease	0.949634
Crohn's Disease	MTS	frc	A0A377BTA6	Proteobacteria	Gammaproteobacteria	Enterobacterales	Enterobacteriaceae	Escherichia	Escherichia coli	P6037	Crohn's Disease	0.0617721
Crohn's Disease	MTG	frc	A0A072MW66	Actinobacteria	Actinobacteria	Bifidobacteriales	Bifidobacteriaceae	Bifidobacterium	Bifidobacterium pseudocatenulatum IPLA36007	P6037	Crohn's Disease-L3	0.0326265
Crohn's Disease	MTG	frc	A0A1V8Q5N2	Actinobacteria	Actinobacteria	Bifidobacteriales	Bifidobacteriaceae	Bifidobacterium	Bifidobacterium dentium	P6037	Crohn's Disease-L3	0.0323272
Crohn's Disease	MTG	frc	A0A377BTA6	Proteobacteria	Gammaproteobacteria	Enterobacterales	Enterobacteriaceae	Escherichia	Escherichia coli	P6037	Crohn's Disease-L3	0.512499
Crohn's Disease	MTG	frc	A1ADQ1	Proteobacteria	Gammaproteobacteria	Enterobacterales	Enterobacteriaceae	Escherichia	Escherichia coli APEC O1	P6037	Crohn's Disease-L3	0.949634
Crohn's Disease	MTS	frc	A0A377BTA6	Proteobacteria	Gammaproteobacteria	Enterobacterales	Enterobacteriaceae	Escherichia	Escherichia coli	P6037	Crohn's Disease-L3	0.0617721
Ulcerative colitis	MTG	frc	A0A377BTA6	Proteobacteria	Gammaproteobacteria	Enterobacterales	Enterobacteriaceae	Escherichia	Escherichia coli	C2067	Ulcerative colitis	0.0300619
Ulcerative colitis	MTG	frc	A0A087ADU5	Actinobacteria	Actinobacteria	Bifidobacteriales	Bifidobacteriaceae	Bifidobacterium	Bifidobacterium choerinum	C2083	Ulcerative colitis	0.185984
Ulcerative colitis	MTG	frc	A0A087B567	Actinobacteria	Actinobacteria	Bifidobacteriales	Bifidobacteriaceae	Bifidobacterium	Bifidobacterium cuniculi	C2083	Ulcerative colitis	0.0372808
Ulcerative colitis	MTG	frc	A0A0L7BLA3	Actinobacteria	Actinobacteria	Bifidobacteriales	Bifidobacteriaceae	Bifidobacterium	Bifidobacterium animalis subsp. animalis MCC 0483	C2083	Ulcerative colitis	0.0745617
Ulcerative colitis	MTG	frc	A0A0R1PNQ4	Firmicutes	Bacilli	Lactobacillales	Lactobacillaceae	Lactobacillus	Lactobacillus kefiranofaciens subsp. kefirgranum D	C2083	Ulcerative colitis	0.0743937
Ulcerative colitis	MTG	frc	A0A0R1UH43	Firmicutes	Bacilli	Lactobacillales	Lactobacillaceae	Lactobacillus	Lactobacillus kalixensis DSM 16043	C2083	Ulcerative colitis	0.0737295
Ulcerative colitis	MTG	frc	G1U9U4	Firmicutes	Bacilli	Lactobacillales	Lactobacillaceae	Lactobacillus	Lactobacillus acidophilus	C2083	Ulcerative colitis	0.0371133
Ulcerative colitis	MTG	frc	A0A087QB11	Firmicutes	Bacilli	Lactobacillales	Lactobacillaceae	Lactobacillus	Lactobacillus gasseri SV-16A-US	C2091	Ulcerative colitis	0.0322459
Ulcerative colitis	MTG	frc	A0A0R1PNQ4	Firmicutes	Bacilli	Lactobacillales	Lactobacillaceae	Lactobacillus	Lactobacillus kefiranofaciens subsp. kefirgranum D	C2091	Ulcerative colitis	0.131307
Ulcerative colitis	MTG	frc	A0A377BTA6	Proteobacteria	Gammaproteobacteria	Enterobacterales	Enterobacteriaceae	Escherichia	Escherichia coli	C2091	Ulcerative colitis	0.892355
Ulcerative colitis	MTG	frc	A1ADQ1	Proteobacteria	Gammaproteobacteria	Enterobacterales	Enterobacteriaceae	Escherichia	Escherichia coli APEC O1	C2091	Ulcerative colitis	0.630655
Ulcerative colitis	MTG	frc	B5YYX4	Proteobacteria	Gammaproteobacteria	Enterobacterales	Enterobacteriaceae	Escherichia	Escherichia coli O157:H7 str. EC4115	C2091	Ulcerative colitis	0.0700727
Ulcerative colitis	MTG	frc	C7XLI6	Firmicutes	Bacilli	Lactobacillales	Lactobacillaceae	Lactobacillus	Lactobacillus crispatus 125-2-CHN	C2091	Ulcerative colitis	0.231351
Ulcerative colitis	MTG	frc	A0A377BTA6	Proteobacteria	Gammaproteobacteria	Enterobacterales	Enterobacteriaceae	Escherichia	Escherichia coli	C3003	Ulcerative colitis	0.025412
Ulcerative colitis	MTG	frc	A1ADQ1	Proteobacteria	Gammaproteobacteria	Enterobacterales	Enterobacteriaceae	Escherichia	Escherichia coli APEC O1	C3003	Ulcerative colitis	0.0419445
Ulcerative colitis	MTG	frc	B5YYX4	Proteobacteria	Gammaproteobacteria	Enterobacterales	Enterobacteriaceae	Escherichia	Escherichia coli O157:H7 str. EC4115	C3003	Ulcerative colitis	0.0269391
Ulcerative colitis	MTG	frc	A0A062XDE4	Firmicutes	Bacilli	Lactobacillales	Lactobacillaceae	Lactobacillus	Lactobacillus animalis	C3004	Ulcerative colitis	0.025941
Ulcerative colitis	MTG	frc	A0A0R1PNQ4	Firmicutes	Bacilli	Lactobacillales	Lactobacillaceae	Lactobacillus	Lactobacillus kefiranofaciens subsp. kefirgranum D	C3004	Ulcerative colitis	0.0264084
Ulcerative colitis	MTG	frc	A0A1X0XWW8	Actinobacteria	Actinobacteria	Corynebacteriales	Mycobacteriaceae	Mycobacterium	Mycobacterium simiae	C3004	Ulcerative colitis	0.0388858
Ulcerative colitis	MTG	frc	A0A2V1J0Z5	Bacteroidetes	Bacteroidia	Bacteroidales	Muribaculaceae	NA	Muribaculaceae bacterium DSM 100764	C3004	Ulcerative colitis	0.0275354
Ulcerative colitis	MTG	frc	A0A377BTA6	Proteobacteria	Gammaproteobacteria	Enterobacterales	Enterobacteriaceae	Escherichia	Escherichia coli	C3004	Ulcerative colitis	0.122905
Ulcerative colitis	MTG	frc	A1ADQ1	Proteobacteria	Gammaproteobacteria	Enterobacterales	Enterobacteriaceae	Escherichia	Escherichia coli APEC O1	C3004	Ulcerative colitis	0.101227
Ulcerative colitis	MTG	frc	O06644	Proteobacteria	Betaproteobacteria	Burkholderiales	Oxalobacteraceae	Oxalobacter	Oxalobacter formigenes	C3004	Ulcerative colitis	0.0379773
Ulcerative colitis	MTG	frc	A0A016XI66	Proteobacteria	Betaproteobacteria	Burkholderiales	Comamonadaceae	Hylemonella	Hylemonella gracilis str. Niagara R	C3005	Ulcerative colitis	0.0388655
Ulcerative colitis	MTG	frc	A0A062XDE4	Firmicutes	Bacilli	Lactobacillales	Lactobacillaceae	Lactobacillus	Lactobacillus animalis	C3005	Ulcerative colitis	0.0211239
Ulcerative colitis	MTG	frc	A0A0H2QFH1	Proteobacteria	Gammaproteobacteria	Enterobacterales	Morganellaceae	Moellerella	Moellerella wisconsensis	C3005	Ulcerative colitis	0.025484
Ulcerative colitis	MTG	frc	A0A0K4YN22	Proteobacteria	Gammaproteobacteria	Enterobacterales	Enterobacteriaceae	Escherichia	Escherichia coli	C3005	Ulcerative colitis	0.0150954
Ulcerative colitis	MTG	frc	A0A0L0ALL8	Proteobacteria	Gammaproteobacteria	Enterobacterales	Enterobacteriaceae	Klebsiella	Klebsiella sp. RIT-PI-d	C3005	Ulcerative colitis	0.0150954
Ulcerative colitis	MTG	frc	A0A109CET1	Proteobacteria	Betaproteobacteria	Burkholderiales	Comamonadaceae	Variovorax	Variovorax sp. WDL1	C3005	Ulcerative colitis	0.0151318
Ulcerative colitis	MTG	frc	A0A127JTF3	Proteobacteria	Betaproteobacteria	Burkholderiales	Comamonadaceae	Ramlibacter	Ramlibacter tataouinensis	C3005	Ulcerative colitis	0.0148808
Ulcerative colitis	MTG	frc	A0A140NM80	Proteobacteria	Gammaproteobacteria	Enterobacterales	Morganellaceae	Providencia	Providencia stuartii MRSN 2154	C3005	Ulcerative colitis	0.0178505
Ulcerative colitis	MTG	frc	A0A192ER68	Proteobacteria	Gammaproteobacteria	Enterobacterales	Enterobacteriaceae	Escherichia	Escherichia coli	C3005	Ulcerative colitis	0.0150954
Ulcerative colitis	MTG	frc	A0A1B1SBJ2	Bacteroidetes	Bacteroidia	Bacteroidales	Muribaculaceae	Muribaculum	Muribaculum intestinale	C3005	Ulcerative colitis	0.224917
Ulcerative colitis	MTG	frc	A0A1B7KKZ3	Proteobacteria	Gammaproteobacteria	Enterobacterales	Hafniaceae	Obesumbacterium	Obesumbacterium proteus ATCC 12841	C3005	Ulcerative colitis	0.0415544
Ulcerative colitis	MTG	frc	A0A1C7CW93	Proteobacteria	Gammaproteobacteria	Enterobacterales	Enterobacteriaceae	Escherichia	Escherichia coli	C3005	Ulcerative colitis	0.0256025
Ulcerative colitis	MTG	frc	A0A1E3STM3	Actinobacteria	Actinobacteria	Corynebacteriales	Mycobacteriaceae	Mycobacterium	Mycobacterium sherrisii	C3005	Ulcerative colitis	0.0206778
Ulcerative colitis	MTG	frc	A0A1I1DMD5	Proteobacteria	Betaproteobacteria	Burkholderiales	Oxalobacteraceae	Collimonas	Collimonas sp. OK412	C3005	Ulcerative colitis	0.0187215
Ulcerative colitis	MTG	frc	A0A1M4E412	Actinobacteria	Actinobacteria	Streptosporangiales	Streptosporangiaceae	Nonomuraea	Nonomuraea gerenzanensis	C3005	Ulcerative colitis	0.0154292
Ulcerative colitis	MTG	frc	A0A1P8XAG9	Actinobacteria	Actinobacteria	Corynebacteriales	Mycobacteriaceae	Mycobacterium	Mycobacterium sp. MS1601	C3005	Ulcerative colitis	0.0203852
Ulcerative colitis	MTG	frc	A0A1Q6EIZ9	Bacteroidetes	Bacteroidia	Bacteroidales	NA	NA	Bacteroidales bacterium 52_46	C3005	Ulcerative colitis	0.0753179
Ulcerative colitis	MTG	frc	A0A1S1HMB9	Proteobacteria	Gammaproteobacteria	Enterobacterales	Morganellaceae	Providencia	Providencia stuartii	C3005	Ulcerative colitis	0.0206778
Ulcerative colitis	MTG	frc	A0A1U9T5R4	Proteobacteria	Gammaproteobacteria	Enterobacterales	Enterobacteriaceae	Escherichia	Escherichia coli	C3005	Ulcerative colitis	0.0358726
Ulcerative colitis	MTG	frc	A0A209A2M1	Proteobacteria	Gammaproteobacteria	Enterobacterales	Yersiniaceae	Yersinia	Yersinia frederiksenii	C3005	Ulcerative colitis	0.0314354
Ulcerative colitis	MTG	frc	A0A2S8JKC0	Proteobacteria	Gammaproteobacteria	Enterobacterales	Enterobacteriaceae	Escherichia	Escherichia coli	C3005	Ulcerative colitis	0.0207772
Ulcerative colitis	MTG	frc	A0A2V1IPP0	Bacteroidetes	Bacteroidia	Bacteroidales	Muribaculaceae	NA	Muribaculaceae bacterium DSM 103720	C3005	Ulcerative colitis	0.93931
Ulcerative colitis	MTG	frc	A0A2V1J0Z5	Bacteroidetes	Bacteroidia	Bacteroidales	Muribaculaceae	NA	Muribaculaceae bacterium DSM 100764	C3005	Ulcerative colitis	0.605333
Ulcerative colitis	MTG	frc	A0A2V7C257	Candidatus Rokubacteria	NA	NA	NA	NA	Candidatus Rokubacteria bacterium	C3005	Ulcerative colitis	0.0203852
Ulcerative colitis	MTG	frc	A0A2X1KJL9	Proteobacteria	Gammaproteobacteria	Enterobacterales	Enterobacteriaceae	Escherichia	Escherichia coli	C3005	Ulcerative colitis	0.0196856
Ulcerative colitis	MTG	frc	A0A328XJ62	Proteobacteria	Betaproteobacteria	Burkholderiales	Burkholderiaceae	Paraburkholderia	Paraburkholderia unamae	C3005	Ulcerative colitis	0.0207772
Ulcerative colitis	MTG	frc	A0A354HZG4	Bacteroidetes	Bacteroidia	Bacteroidales	Porphyromonadaceae	NA	Porphyromonadaceae bacterium	C3005	Ulcerative colitis	1.13763
Ulcerative colitis	MTG	frc	A0A355Z7A2	Bacteroidetes	Bacteroidia	Bacteroidales	Porphyromonadaceae	NA	Porphyromonadaceae bacterium	C3005	Ulcerative colitis	0.264833
Ulcerative colitis	MTG	frc	A0A377BTA6	Proteobacteria	Gammaproteobacteria	Enterobacterales	Enterobacteriaceae	Escherichia	Escherichia coli	C3005	Ulcerative colitis	8.05068
Ulcerative colitis	MTG	frc	A1ADQ1	Proteobacteria	Gammaproteobacteria	Enterobacterales	Enterobacteriaceae	Escherichia	Escherichia coli APEC O1	C3005	Ulcerative colitis	6.68393
Ulcerative colitis	MTG	frc	A4G241	Proteobacteria	Betaproteobacteria	Burkholderiales	Oxalobacteraceae	Herminiimonas	Herminiimonas arsenicoxydans	C3005	Ulcerative colitis	0.0189002
Ulcerative colitis	MTG	frc	A6T0J2	Proteobacteria	Betaproteobacteria	Burkholderiales	Oxalobacteraceae	Janthinobacterium	Janthinobacterium sp. Marseille	C3005	Ulcerative colitis	0.0163726
Ulcerative colitis	MTG	frc	B5YYX4	Proteobacteria	Gammaproteobacteria	Enterobacterales	Enterobacteriaceae	Escherichia	Escherichia coli O157:H7 str. EC4115	C3005	Ulcerative colitis	0.0239203
Ulcerative colitis	MTG	frc	C3X762	Proteobacteria	Betaproteobacteria	Burkholderiales	Oxalobacteraceae	Oxalobacter	Oxalobacter formigenes HOxBLS	C3005	Ulcerative colitis	0.0770943
Ulcerative colitis	MTG	frc	M9GF19	Proteobacteria	Gammaproteobacteria	Enterobacterales	Enterobacteriaceae	Escherichia	Escherichia coli MP021561.2	C3005	Ulcerative colitis	0.0253848
Ulcerative colitis	MTG	frc	O06644	Proteobacteria	Betaproteobacteria	Burkholderiales	Oxalobacteraceae	Oxalobacter	Oxalobacter formigenes	C3005	Ulcerative colitis	0.0381869
Ulcerative colitis	MTG	frc	Q8FFE8	Proteobacteria	Gammaproteobacteria	Enterobacterales	Enterobacteriaceae	Escherichia	Escherichia coli CFT073	C3005	Ulcerative colitis	0.677559
Ulcerative colitis	MTG	frc	R5AR18	Bacteroidetes	Bacteroidia	Bacteroidales	Prevotellaceae	Prevotella	Prevotella sp. CAG:1031	C3005	Ulcerative colitis	0.487321
Ulcerative colitis	MTG	frc	R5AXI8	Bacteroidetes	Bacteroidia	Bacteroidales	Bacteroidaceae	Bacteroides	Bacteroides sp. CAG:927	C3005	Ulcerative colitis	0.872185
Ulcerative colitis	MTS	frc	A0A2V1IPP0	Bacteroidetes	Bacteroidia	Bacteroidales	Muribaculaceae	NA	Muribaculaceae bacterium DSM 103720	C3005	Ulcerative colitis	0.0575779
Ulcerative colitis	MTS	frc	A0A2V1J0Z5	Bacteroidetes	Bacteroidia	Bacteroidales	Muribaculaceae	NA	Muribaculaceae bacterium DSM 100764	C3005	Ulcerative colitis	0.115955
Ulcerative colitis	MTS	frc	A0A354HZG4	Bacteroidetes	Bacteroidia	Bacteroidales	Porphyromonadaceae	NA	Porphyromonadaceae bacterium	C3005	Ulcerative colitis	0.0581122
Ulcerative colitis	MTS	frc	A0A355Z7A2	Bacteroidetes	Bacteroidia	Bacteroidales	Porphyromonadaceae	NA	Porphyromonadaceae bacterium	C3005	Ulcerative colitis	0.115955
Ulcerative colitis	MTS	frc	A0A377BTA6	Proteobacteria	Gammaproteobacteria	Enterobacterales	Enterobacteriaceae	Escherichia	Escherichia coli	C3005	Ulcerative colitis	0.371727
Ulcerative colitis	MTS	frc	A1ADQ1	Proteobacteria	Gammaproteobacteria	Enterobacterales	Enterobacteriaceae	Escherichia	Escherichia coli APEC O1	C3005	Ulcerative colitis	0.068816
Ulcerative colitis	MTS	frc	C3X762	Proteobacteria	Betaproteobacteria	Burkholderiales	Oxalobacteraceae	Oxalobacter	Oxalobacter formigenes HOxBLS	C3005	Ulcerative colitis	0.413502
Ulcerative colitis	MTS	frc	O06644	Proteobacteria	Betaproteobacteria	Burkholderiales	Oxalobacteraceae	Oxalobacter	Oxalobacter formigenes	C3005	Ulcerative colitis	0.351117
Ulcerative colitis	MTS	frc	R5AXI8	Bacteroidetes	Bacteroidia	Bacteroidales	Bacteroidaceae	Bacteroides	Bacteroides sp. CAG:927	C3005	Ulcerative colitis	0.174337
Ulcerative colitis	MTG	frc	A0A087ADU5	Actinobacteria	Actinobacteria	Bifidobacteriales	Bifidobacteriaceae	Bifidobacterium	Bifidobacterium choerinum	C3006	Ulcerative colitis	0.0372943
Ulcerative colitis	MTG	frc	A0A0S4NNV8	Firmicutes	Bacilli	Lactobacillales	Lactobacillaceae	Lactobacillus	Lactobacillus reuteri ATCC 53608	C3006	Ulcerative colitis	0.0149718
Ulcerative colitis	MTG	frc	A0A2I6E5X4	Proteobacteria	Gammaproteobacteria	Enterobacterales	Enterobacteriaceae	Enterobacter	Enterobacter cancerogenus	C3006	Ulcerative colitis	0.0166196
Ulcerative colitis	MTG	frc	A0A2W6PGI2	Proteobacteria	Gammaproteobacteria	Enterobacterales	Enterobacteriaceae	Escherichia	Escherichia coli	C3006	Ulcerative colitis	0.0287515
Ulcerative colitis	MTG	frc	A0A377BTA6	Proteobacteria	Gammaproteobacteria	Enterobacterales	Enterobacteriaceae	Escherichia	Escherichia coli	C3006	Ulcerative colitis	0.606678
Ulcerative colitis	MTG	frc	A1ADQ1	Proteobacteria	Gammaproteobacteria	Enterobacterales	Enterobacteriaceae	Escherichia	Escherichia coli APEC O1	C3006	Ulcerative colitis	0.61849
Ulcerative colitis	MTS	frc	A0A377BTA6	Proteobacteria	Gammaproteobacteria	Enterobacterales	Enterobacteriaceae	Escherichia	Escherichia coli	C3006	Ulcerative colitis	0.0673726
Ulcerative colitis	MTG	frc	A0A062XDE4	Firmicutes	Bacilli	Lactobacillales	Lactobacillaceae	Lactobacillus	Lactobacillus animalis	C3011	Ulcerative colitis	0.200784
Ulcerative colitis	MTG	frc	A0A072MW66	Actinobacteria	Actinobacteria	Bifidobacteriales	Bifidobacteriaceae	Bifidobacterium	Bifidobacterium pseudocatenulatum IPLA36007	C3011	Ulcerative colitis	0.0536782
Ulcerative colitis	MTG	frc	A0A087QB11	Firmicutes	Bacilli	Lactobacillales	Lactobacillaceae	Lactobacillus	Lactobacillus gasseri SV-16A-US	C3011	Ulcerative colitis	0.0381542
Ulcerative colitis	MTG	frc	A0A0L0ALL8	Proteobacteria	Gammaproteobacteria	Enterobacterales	Enterobacteriaceae	Klebsiella	Klebsiella sp. RIT-PI-d	C3011	Ulcerative colitis	0.0862106
Ulcerative colitis	MTG	frc	A0A0R1HAW1	Firmicutes	Bacilli	Lactobacillales	Lactobacillaceae	Lactobacillus	Lactobacillus amylovorus DSM 20531	C3011	Ulcerative colitis	0.136268
Ulcerative colitis	MTG	frc	A0A0R1PNQ4	Firmicutes	Bacilli	Lactobacillales	Lactobacillaceae	Lactobacillus	Lactobacillus kefiranofaciens subsp. kefirgranum D	C3011	Ulcerative colitis	0.183361
Ulcerative colitis	MTG	frc	A0A0R2KS09	Firmicutes	Bacilli	Lactobacillales	Lactobacillaceae	Lactobacillus	Lactobacillus amylovorus DSM 16698	C3011	Ulcerative colitis	0.117107
Ulcerative colitis	MTG	frc	A0A354HZG4	Bacteroidetes	Bacteroidia	Bacteroidales	Porphyromonadaceae	NA	Porphyromonadaceae bacterium	C3011	Ulcerative colitis	0.0474899
Ulcerative colitis	MTG	frc	A0A377BTA6	Proteobacteria	Gammaproteobacteria	Enterobacterales	Enterobacteriaceae	Escherichia	Escherichia coli	C3011	Ulcerative colitis	0.359363
Ulcerative colitis	MTG	frc	A1ADQ1	Proteobacteria	Gammaproteobacteria	Enterobacterales	Enterobacteriaceae	Escherichia	Escherichia coli APEC O1	C3011	Ulcerative colitis	0.961146
Ulcerative colitis	MTG	frc	B5YYX4	Proteobacteria	Gammaproteobacteria	Enterobacterales	Enterobacteriaceae	Escherichia	Escherichia coli O157:H7 str. EC4115	C3011	Ulcerative colitis	0.126896
Ulcerative colitis	MTG	frc	R5AXI8	Bacteroidetes	Bacteroidia	Bacteroidales	Bacteroidaceae	Bacteroides	Bacteroides sp. CAG:927	C3011	Ulcerative colitis	0.0499085
Ulcerative colitis	MTG	frc	A0A087ADU5	Actinobacteria	Actinobacteria	Bifidobacteriales	Bifidobacteriaceae	Bifidobacterium	Bifidobacterium choerinum	C3013	Ulcerative colitis	0.0337089
Ulcerative colitis	MTG	frc	A0A0A7I974	Actinobacteria	Actinobacteria	Bifidobacteriales	Bifidobacteriaceae	Bifidobacterium	Bifidobacterium pseudolongum PV8-2	C3013	Ulcerative colitis	0.027626
Ulcerative colitis	MTG	frc	A0A174S0X3	Firmicutes	Clostridia	Clostridiales	Clostridiaceae	Clostridium	Clostridium baratii	C3013	Ulcerative colitis	0.0339066
Ulcerative colitis	MTG	frc	A0A1Q6EIZ9	Bacteroidetes	Bacteroidia	Bacteroidales	NA	NA	Bacteroidales bacterium 52_46	C3013	Ulcerative colitis	0.0991416
Ulcerative colitis	MTG	frc	A0A377BTA6	Proteobacteria	Gammaproteobacteria	Enterobacterales	Enterobacteriaceae	Escherichia	Escherichia coli	C3013	Ulcerative colitis	0.230255
Ulcerative colitis	MTG	frc	A1ADQ1	Proteobacteria	Gammaproteobacteria	Enterobacterales	Enterobacteriaceae	Escherichia	Escherichia coli APEC O1	C3013	Ulcerative colitis	0.26775
Ulcerative colitis	MTG	frc	A0A0R1XV35	Firmicutes	Bacilli	Lactobacillales	Lactobacillaceae	Lactobacillus	Lactobacillus intestinalis DSM 6629	C3015	Ulcerative colitis	0.0321544
Ulcerative colitis	MTG	frc	A0A1Q6EIZ9	Bacteroidetes	Bacteroidia	Bacteroidales	NA	NA	Bacteroidales bacterium 52_46	C3015	Ulcerative colitis	0.0997972
Ulcerative colitis	MTG	frc	A0A2V1J0Z5	Bacteroidetes	Bacteroidia	Bacteroidales	Muribaculaceae	NA	Muribaculaceae bacterium DSM 100764	C3015	Ulcerative colitis	0.0452968
Ulcerative colitis	MTG	frc	A0A377BTA6	Proteobacteria	Gammaproteobacteria	Enterobacterales	Enterobacteriaceae	Escherichia	Escherichia coli	C3015	Ulcerative colitis	0.377542
Ulcerative colitis	MTG	frc	A1ADQ1	Proteobacteria	Gammaproteobacteria	Enterobacterales	Enterobacteriaceae	Escherichia	Escherichia coli APEC O1	C3015	Ulcerative colitis	0.246494
Ulcerative colitis	MTG	frc	R9KTQ7	Actinobacteria	Coriobacteriia	Eggerthellales	Eggerthellaceae	Enterorhabdus	Enterorhabdus caecimuris B7	C3015	Ulcerative colitis	0.0317304
Ulcerative colitis	MTS	frc	A0A1Q6EIZ9	Bacteroidetes	Bacteroidia	Bacteroidales	NA	NA	Bacteroidales bacterium 52_46	C3015	Ulcerative colitis	0.330114
Ulcerative colitis	MTS	frc	A0A377BTA6	Proteobacteria	Gammaproteobacteria	Enterobacterales	Enterobacteriaceae	Escherichia	Escherichia coli	C3015	Ulcerative colitis	0.101165
Ulcerative colitis	MTS	frc	R9KTQ7	Actinobacteria	Coriobacteriia	Eggerthellales	Eggerthellaceae	Enterorhabdus	Enterorhabdus caecimuris B7	C3015	Ulcerative colitis	0.065303
Ulcerative colitis	MTG	frc	A0A2V1J0Z5	Bacteroidetes	Bacteroidia	Bacteroidales	Muribaculaceae	NA	Muribaculaceae bacterium DSM 100764	C3032	Ulcerative colitis	0.0263963
Ulcerative colitis	MTG	frc	A0A377BTA6	Proteobacteria	Gammaproteobacteria	Enterobacterales	Enterobacteriaceae	Escherichia	Escherichia coli	C3032	Ulcerative colitis	0.0671151
Ulcerative colitis	MTG	frc	A1ADQ1	Proteobacteria	Gammaproteobacteria	Enterobacterales	Enterobacteriaceae	Escherichia	Escherichia coli APEC O1	C3032	Ulcerative colitis	0.426818
Ulcerative colitis	MTG	frc	B5YYX4	Proteobacteria	Gammaproteobacteria	Enterobacterales	Enterobacteriaceae	Escherichia	Escherichia coli O157:H7 str. EC4115	C3032	Ulcerative colitis	0.0355682
Ulcerative colitis	MTG	frc	A0A087ADU5	Actinobacteria	Actinobacteria	Bifidobacteriales	Bifidobacteriaceae	Bifidobacterium	Bifidobacterium choerinum	C3034	Ulcerative colitis	0.12126
Ulcerative colitis	MTG	frc	A0A087QB11	Firmicutes	Bacilli	Lactobacillales	Lactobacillaceae	Lactobacillus	Lactobacillus gasseri SV-16A-US	C3034	Ulcerative colitis	0.0447757
Ulcerative colitis	MTG	frc	A0A0L7BLA3	Actinobacteria	Actinobacteria	Bifidobacteriales	Bifidobacteriaceae	Bifidobacterium	Bifidobacterium animalis subsp. animalis MCC 0483	C3034	Ulcerative colitis	0.0690087
Ulcerative colitis	MTG	frc	A0A1Q6EIZ9	Bacteroidetes	Bacteroidia	Bacteroidales	NA	NA	Bacteroidales bacterium 52_46	C3034	Ulcerative colitis	0.043773
Ulcerative colitis	MTG	frc	A0A2A2EHW6	Actinobacteria	Actinobacteria	Bifidobacteriales	Bifidobacteriaceae	Bifidobacterium	Bifidobacterium criceti	C3034	Ulcerative colitis	0.091711
Ulcerative colitis	MTG	frc	A0A377BTA6	Proteobacteria	Gammaproteobacteria	Enterobacterales	Enterobacteriaceae	Escherichia	Escherichia coli	C3034	Ulcerative colitis	0.20532
Ulcerative colitis	MTG	frc	A1ADQ1	Proteobacteria	Gammaproteobacteria	Enterobacterales	Enterobacteriaceae	Escherichia	Escherichia coli APEC O1	C3034	Ulcerative colitis	0.34495
Ulcerative colitis	MTG	frc	G1U9U4	Firmicutes	Bacilli	Lactobacillales	Lactobacillaceae	Lactobacillus	Lactobacillus acidophilus	C3034	Ulcerative colitis	0.18192
Ulcerative colitis	MTS	frc	A0A087ADU5	Actinobacteria	Actinobacteria	Bifidobacteriales	Bifidobacteriaceae	Bifidobacterium	Bifidobacterium choerinum	C3034	Ulcerative colitis	0.0369567
Ulcerative colitis	MTS	frc	A0A0L7BLA3	Actinobacteria	Actinobacteria	Bifidobacteriales	Bifidobacteriaceae	Bifidobacterium	Bifidobacterium animalis subsp. animalis MCC 0483	C3034	Ulcerative colitis	0.131347
Ulcerative colitis	MTS	frc	G1U9U4	Firmicutes	Bacilli	Lactobacillales	Lactobacillaceae	Lactobacillus	Lactobacillus acidophilus	C3034	Ulcerative colitis	0.0591381
Ulcerative colitis	MTG	frc	A0A1V8Q5N2	Actinobacteria	Actinobacteria	Bifidobacteriales	Bifidobacteriaceae	Bifidobacterium	Bifidobacterium dentium	C3036	Ulcerative colitis	0.101855
Ulcerative colitis	MTG	frc	A0A377BTA6	Proteobacteria	Gammaproteobacteria	Enterobacterales	Enterobacteriaceae	Escherichia	Escherichia coli	C3036	Ulcerative colitis	0.15105
Ulcerative colitis	MTG	frc	A0A072MW66	Actinobacteria	Actinobacteria	Bifidobacteriales	Bifidobacteriaceae	Bifidobacterium	Bifidobacterium pseudocatenulatum IPLA36007	C3037	Ulcerative colitis	0.135069
Ulcerative colitis	MTG	frc	A0A087ADU5	Actinobacteria	Actinobacteria	Bifidobacteriales	Bifidobacteriaceae	Bifidobacterium	Bifidobacterium choerinum	C3037	Ulcerative colitis	0.0369726
Ulcerative colitis	MTG	frc	A0A0R1HAW1	Firmicutes	Bacilli	Lactobacillales	Lactobacillaceae	Lactobacillus	Lactobacillus amylovorus DSM 20531	C3037	Ulcerative colitis	0.0455919
Ulcerative colitis	MTG	frc	A0A1Q6EIZ9	Bacteroidetes	Bacteroidia	Bacteroidales	NA	NA	Bacteroidales bacterium 52_46	C3037	Ulcerative colitis	0.49269
Ulcerative colitis	MTG	frc	A0A1V8Q5N2	Actinobacteria	Actinobacteria	Bifidobacteriales	Bifidobacteriaceae	Bifidobacterium	Bifidobacterium dentium	C3037	Ulcerative colitis	0.13383
Ulcerative colitis	MTG	frc	A0A377BTA6	Proteobacteria	Gammaproteobacteria	Enterobacterales	Enterobacteriaceae	Escherichia	Escherichia coli	C3037	Ulcerative colitis	0.0372241
Ulcerative colitis	MTG	frc	G1U9U4	Firmicutes	Bacilli	Lactobacillales	Lactobacillaceae	Lactobacillus	Lactobacillus acidophilus	C3037	Ulcerative colitis	0.0454895
Ulcerative colitis	MTS	frc	A0A087ADU5	Actinobacteria	Actinobacteria	Bifidobacteriales	Bifidobacteriaceae	Bifidobacterium	Bifidobacterium choerinum	C3037	Ulcerative colitis	0.0549287
Ulcerative colitis	MTG	frc	A0A072MW66	Actinobacteria	Actinobacteria	Bifidobacteriales	Bifidobacteriaceae	Bifidobacterium	Bifidobacterium pseudocatenulatum IPLA36007	C4010	Ulcerative colitis	4.62307
Ulcerative colitis	MTG	frc	A0A1Q6EPI6	Actinobacteria	Actinobacteria	Bifidobacteriales	Bifidobacteriaceae	Bifidobacterium	Bifidobacterium sp. 56_9_plus	C4010	Ulcerative colitis	0.105436
Ulcerative colitis	MTG	frc	A1ADQ1	Proteobacteria	Gammaproteobacteria	Enterobacterales	Enterobacteriaceae	Escherichia	Escherichia coli APEC O1	C4010	Ulcerative colitis	0.228614
Ulcerative colitis	MTG	frc	A0A377BTA6	Proteobacteria	Gammaproteobacteria	Enterobacterales	Enterobacteriaceae	Escherichia	Escherichia coli	C4044	Ulcerative colitis	0.0292425
Ulcerative colitis	MTG	frc	A1ADQ1	Proteobacteria	Gammaproteobacteria	Enterobacterales	Enterobacteriaceae	Escherichia	Escherichia coli APEC O1	C4044	Ulcerative colitis	0.185999
Ulcerative colitis	MTG	frc	A0A0H2QFH1	Proteobacteria	Gammaproteobacteria	Enterobacterales	Morganellaceae	Moellerella	Moellerella wisconsensis	C5022	Ulcerative colitis	0.0191084
Ulcerative colitis	MTG	frc	A0A377BTA6	Proteobacteria	Gammaproteobacteria	Enterobacterales	Enterobacteriaceae	Escherichia	Escherichia coli	C5022	Ulcerative colitis	0.450629
Ulcerative colitis	MTG	frc	A1ADQ1	Proteobacteria	Gammaproteobacteria	Enterobacterales	Enterobacteriaceae	Escherichia	Escherichia coli APEC O1	C5022	Ulcerative colitis	0.993637
Ulcerative colitis	MTG	frc	B5YYX4	Proteobacteria	Gammaproteobacteria	Enterobacterales	Enterobacteriaceae	Escherichia	Escherichia coli O157:H7 str. EC4115	C5022	Ulcerative colitis	0.0191084
Ulcerative colitis	MTG	frc	A0A1B1SBJ2	Bacteroidetes	Bacteroidia	Bacteroidales	Muribaculaceae	Muribaculum	Muribaculum intestinale	C6013	Ulcerative colitis	0.0676088
Ulcerative colitis	MTG	frc	A0A2V1J0Z5	Bacteroidetes	Bacteroidia	Bacteroidales	Muribaculaceae	NA	Muribaculaceae bacterium DSM 100764	C6013	Ulcerative colitis	0.272939
Ulcerative colitis	MTG	frc	A0A354HZG4	Bacteroidetes	Bacteroidia	Bacteroidales	Porphyromonadaceae	NA	Porphyromonadaceae bacterium	C6013	Ulcerative colitis	0.136786
Ulcerative colitis	MTG	frc	R5AR18	Bacteroidetes	Bacteroidia	Bacteroidales	Prevotellaceae	Prevotella	Prevotella sp. CAG:1031	C6013	Ulcerative colitis	0.0676088
Ulcerative colitis	MTG	frc	R5AXI8	Bacteroidetes	Bacteroidia	Bacteroidales	Bacteroidaceae	Bacteroides	Bacteroides sp. CAG:927	C6013	Ulcerative colitis	0.136786
Ulcerative colitis	MTG	frc	A0A377BTA6	Proteobacteria	Gammaproteobacteria	Enterobacterales	Enterobacteriaceae	Escherichia	Escherichia coli	C6025	Ulcerative colitis	0.160483
Ulcerative colitis	MTG	frc	A1ADQ1	Proteobacteria	Gammaproteobacteria	Enterobacterales	Enterobacteriaceae	Escherichia	Escherichia coli APEC O1	C6025	Ulcerative colitis	0.6238
Ulcerative colitis	MTG	frc	A0A072MW66	Actinobacteria	Actinobacteria	Bifidobacteriales	Bifidobacteriaceae	Bifidobacterium	Bifidobacterium pseudocatenulatum IPLA36007	E5004	Ulcerative colitis	0.0757133
Ulcerative colitis	MTG	frc	A0A174BHB6	Actinobacteria	Actinobacteria	Bifidobacteriales	Bifidobacteriaceae	Bifidobacterium	Bifidobacterium pseudocatenulatum	E5004	Ulcerative colitis	0.0241168
Ulcerative colitis	MTG	frc	A0A377BTA6	Proteobacteria	Gammaproteobacteria	Enterobacterales	Enterobacteriaceae	Escherichia	Escherichia coli	E5004	Ulcerative colitis	0.219669
Ulcerative colitis	MTG	frc	A1ADQ1	Proteobacteria	Gammaproteobacteria	Enterobacterales	Enterobacteriaceae	Escherichia	Escherichia coli APEC O1	E5004	Ulcerative colitis	0.607707
Ulcerative colitis	MTG	frc	B5YYX4	Proteobacteria	Gammaproteobacteria	Enterobacterales	Enterobacteriaceae	Escherichia	Escherichia coli O157:H7 str. EC4115	E5004	Ulcerative colitis	0.091156
Ulcerative colitis	MTG	frc	A0A016XI66	Proteobacteria	Betaproteobacteria	Burkholderiales	Comamonadaceae	Hylemonella	Hylemonella gracilis str. Niagara R	E5008	Ulcerative colitis	0.0962493
Ulcerative colitis	MTG	frc	A0A140NM80	Proteobacteria	Gammaproteobacteria	Enterobacterales	Morganellaceae	Providencia	Providencia stuartii MRSN 2154	E5008	Ulcerative colitis	0.040272
Ulcerative colitis	MTG	frc	A0A1V8Q5N2	Actinobacteria	Actinobacteria	Bifidobacteriales	Bifidobacteriaceae	Bifidobacterium	Bifidobacterium dentium	E5008	Ulcerative colitis	0.775167
Ulcerative colitis	MTG	frc	A0A377BTA6	Proteobacteria	Gammaproteobacteria	Enterobacterales	Enterobacteriaceae	Escherichia	Escherichia coli	E5008	Ulcerative colitis	0.921104
Ulcerative colitis	MTG	frc	A1ADQ1	Proteobacteria	Gammaproteobacteria	Enterobacterales	Enterobacteriaceae	Escherichia	Escherichia coli APEC O1	E5008	Ulcerative colitis	2.15097
Ulcerative colitis	MTG	frc	A0A070SKW5	Proteobacteria	Gammaproteobacteria	Enterobacterales	Enterobacteriaceae	Escherichia	Escherichia coli 2-210-07_S3_C3	H4010	Ulcerative colitis	0.0299565
Ulcerative colitis	MTG	frc	A0A072MW66	Actinobacteria	Actinobacteria	Bifidobacteriales	Bifidobacteriaceae	Bifidobacterium	Bifidobacterium pseudocatenulatum IPLA36007	H4010	Ulcerative colitis	0.41081
Ulcerative colitis	MTG	frc	A0A174BHB6	Actinobacteria	Actinobacteria	Bifidobacteriales	Bifidobacteriaceae	Bifidobacterium	Bifidobacterium pseudocatenulatum	H4010	Ulcerative colitis	0.0691815
Ulcerative colitis	MTG	frc	A0A1Q6EPI6	Actinobacteria	Actinobacteria	Bifidobacteriales	Bifidobacteriaceae	Bifidobacterium	Bifidobacterium sp. 56_9_plus	H4010	Ulcerative colitis	0.0948879
Ulcerative colitis	MTG	frc	A0A377BTA6	Proteobacteria	Gammaproteobacteria	Enterobacterales	Enterobacteriaceae	Escherichia	Escherichia coli	H4010	Ulcerative colitis	0.26402
Ulcerative colitis	MTG	frc	A1ADQ1	Proteobacteria	Gammaproteobacteria	Enterobacterales	Enterobacteriaceae	Escherichia	Escherichia coli APEC O1	H4010	Ulcerative colitis	0.876628
Ulcerative colitis	MTG	frc	Q8FFE8	Proteobacteria	Gammaproteobacteria	Enterobacterales	Enterobacteriaceae	Escherichia	Escherichia coli CFT073	H4010	Ulcerative colitis	0.0282282
Ulcerative colitis	MTG	frc	A0A087ADU5	Actinobacteria	Actinobacteria	Bifidobacteriales	Bifidobacteriaceae	Bifidobacterium	Bifidobacterium choerinum	H4019	Ulcerative colitis	0.153157
Ulcerative colitis	MTG	frc	A0A087B567	Actinobacteria	Actinobacteria	Bifidobacteriales	Bifidobacteriaceae	Bifidobacterium	Bifidobacterium cuniculi	H4019	Ulcerative colitis	0.111753
Ulcerative colitis	MTG	frc	A0A0A7I974	Actinobacteria	Actinobacteria	Bifidobacteriales	Bifidobacteriaceae	Bifidobacterium	Bifidobacterium pseudolongum PV8-2	H4019	Ulcerative colitis	0.111501
Ulcerative colitis	MTG	frc	A0A0G3EP86	Proteobacteria	Betaproteobacteria	Burkholderiales	Burkholderiaceae	Pandoraea	Pandoraea thiooxydans	H4019	Ulcerative colitis	0.0278176
Ulcerative colitis	MTG	frc	A0A0L7BLA3	Actinobacteria	Actinobacteria	Bifidobacteriales	Bifidobacteriaceae	Bifidobacterium	Bifidobacterium animalis subsp. animalis MCC 0483	H4019	Ulcerative colitis	0.0418549
Ulcerative colitis	MTG	frc	A0A0R1HAW1	Firmicutes	Bacilli	Lactobacillales	Lactobacillaceae	Lactobacillus	Lactobacillus amylovorus DSM 20531	H4019	Ulcerative colitis	0.0555416
Ulcerative colitis	MTG	frc	A0A248X7K1	Actinobacteria	Actinobacteria	Bifidobacteriales	Bifidobacteriaceae	Bifidobacterium	Bifidobacterium pseudolongum	H4019	Ulcerative colitis	0.0974067
Ulcerative colitis	MTG	frc	A0A2A2EHW6	Actinobacteria	Actinobacteria	Bifidobacteriales	Bifidobacteriaceae	Bifidobacterium	Bifidobacterium criceti	H4019	Ulcerative colitis	0.0553965
Ulcerative colitis	MTG	frc	A0A377BTA6	Proteobacteria	Gammaproteobacteria	Enterobacterales	Enterobacteriaceae	Escherichia	Escherichia coli	H4019	Ulcerative colitis	0.1688
Ulcerative colitis	MTG	frc	A1ADQ1	Proteobacteria	Gammaproteobacteria	Enterobacterales	Enterobacteriaceae	Escherichia	Escherichia coli APEC O1	H4019	Ulcerative colitis	0.523692
Ulcerative colitis	MTG	frc	C3X2D4	Proteobacteria	Betaproteobacteria	Burkholderiales	Oxalobacteraceae	Oxalobacter	Oxalobacter formigenes HOxBLS	H4019	Ulcerative colitis	0.0524408
Ulcerative colitis	MTG	frc	G1U9U4	Firmicutes	Bacilli	Lactobacillales	Lactobacillaceae	Lactobacillus	Lactobacillus acidophilus	H4019	Ulcerative colitis	0.0277084
Ulcerative colitis	MTS	frc	A0A087ADU5	Actinobacteria	Actinobacteria	Bifidobacteriales	Bifidobacteriaceae	Bifidobacterium	Bifidobacterium choerinum	H4019	Ulcerative colitis	0.288626
Ulcerative colitis	MTS	frc	A0A0L7BLA3	Actinobacteria	Actinobacteria	Bifidobacteriales	Bifidobacteriaceae	Bifidobacterium	Bifidobacterium animalis subsp. animalis MCC 0483	H4019	Ulcerative colitis	0.0508567
Ulcerative colitis	MTS	frc	A0A2I6S3D5	Proteobacteria	Betaproteobacteria	Rhodocyclales	Zoogloeaceae	Azoarcus	Azoarcus sp. SY39	H4019	Ulcerative colitis	0.0491374
Ulcerative colitis	MTS	frc	C3X2D4	Proteobacteria	Betaproteobacteria	Burkholderiales	Oxalobacteraceae	Oxalobacter	Oxalobacter formigenes HOxBLS	H4019	Ulcerative colitis	0.0500792
Ulcerative colitis	MTS	frc	C3X762	Proteobacteria	Betaproteobacteria	Burkholderiales	Oxalobacteraceae	Oxalobacter	Oxalobacter formigenes HOxBLS	H4019	Ulcerative colitis	0.102305
Ulcerative colitis	MTS	frc	O06644	Proteobacteria	Betaproteobacteria	Burkholderiales	Oxalobacteraceae	Oxalobacter	Oxalobacter formigenes	H4019	Ulcerative colitis	0.143968
Ulcerative colitis	MTG	frc	A0A072MW66	Actinobacteria	Actinobacteria	Bifidobacteriales	Bifidobacteriaceae	Bifidobacterium	Bifidobacterium pseudocatenulatum IPLA36007	H4027	Ulcerative colitis	0.408712
Ulcerative colitis	MTG	frc	A0A174BHB6	Actinobacteria	Actinobacteria	Bifidobacteriales	Bifidobacteriaceae	Bifidobacterium	Bifidobacterium pseudocatenulatum	H4027	Ulcerative colitis	0.0598546
Ulcerative colitis	MTG	frc	A0A1Q6EPI6	Actinobacteria	Actinobacteria	Bifidobacteriales	Bifidobacteriaceae	Bifidobacterium	Bifidobacterium sp. 56_9_plus	H4027	Ulcerative colitis	0.0333398
Ulcerative colitis	MTG	frc	A0A377BTA6	Proteobacteria	Gammaproteobacteria	Enterobacterales	Enterobacteriaceae	Escherichia	Escherichia coli	H4027	Ulcerative colitis	0.0412818
Ulcerative colitis	MTG	frc	A1ADQ1	Proteobacteria	Gammaproteobacteria	Enterobacterales	Enterobacteriaceae	Escherichia	Escherichia coli APEC O1	H4027	Ulcerative colitis	0.178439
Ulcerative colitis	MTG	frc	A0A070SKW5	Proteobacteria	Gammaproteobacteria	Enterobacterales	Enterobacteriaceae	Escherichia	Escherichia coli 2-210-07_S3_C3	H4035	Ulcerative colitis	0.0578394
Ulcerative colitis	MTG	frc	A0A072MW66	Actinobacteria	Actinobacteria	Bifidobacteriales	Bifidobacteriaceae	Bifidobacterium	Bifidobacterium pseudocatenulatum IPLA36007	H4035	Ulcerative colitis	0.267801
Ulcerative colitis	MTG	frc	A0A087ADU5	Actinobacteria	Actinobacteria	Bifidobacteriales	Bifidobacteriaceae	Bifidobacterium	Bifidobacterium choerinum	H4035	Ulcerative colitis	0.523721
Ulcerative colitis	MTG	frc	A0A087B567	Actinobacteria	Actinobacteria	Bifidobacteriales	Bifidobacteriaceae	Bifidobacterium	Bifidobacterium cuniculi	H4035	Ulcerative colitis	0.240079
Ulcerative colitis	MTG	frc	A0A0H2QFH1	Proteobacteria	Gammaproteobacteria	Enterobacterales	Morganellaceae	Moellerella	Moellerella wisconsensis	H4035	Ulcerative colitis	0.112972
Ulcerative colitis	MTG	frc	A0A0L7BLA3	Actinobacteria	Actinobacteria	Bifidobacteriales	Bifidobacteriaceae	Bifidobacterium	Bifidobacterium animalis subsp. animalis MCC 0483	H4035	Ulcerative colitis	0.0952656
Ulcerative colitis	MTG	frc	A0A140NMR5	Proteobacteria	Gammaproteobacteria	Enterobacterales	Morganellaceae	Providencia	Providencia stuartii MRSN 2154	H4035	Ulcerative colitis	0.028243
Ulcerative colitis	MTG	frc	A0A174BHB6	Actinobacteria	Actinobacteria	Bifidobacteriales	Bifidobacteriaceae	Bifidobacterium	Bifidobacterium pseudocatenulatum	H4035	Ulcerative colitis	0.186536
Ulcerative colitis	MTG	frc	A0A1B8SW60	Proteobacteria	Gammaproteobacteria	Enterobacterales	Morganellaceae	Providencia	Providencia rettgeri	H4035	Ulcerative colitis	0.056486
Ulcerative colitis	MTG	frc	A0A1V8Q5N2	Actinobacteria	Actinobacteria	Bifidobacteriales	Bifidobacteriaceae	Bifidobacterium	Bifidobacterium dentium	H4035	Ulcerative colitis	0.0912773
Ulcerative colitis	MTG	frc	A0A2A2EHW6	Actinobacteria	Actinobacteria	Bifidobacteriales	Bifidobacteriaceae	Bifidobacterium	Bifidobacterium criceti	H4035	Ulcerative colitis	0.0263433
Ulcerative colitis	MTG	frc	A0A377BTA6	Proteobacteria	Gammaproteobacteria	Enterobacterales	Enterobacteriaceae	Escherichia	Escherichia coli	H4035	Ulcerative colitis	0.304534
Ulcerative colitis	MTG	frc	A1ADQ1	Proteobacteria	Gammaproteobacteria	Enterobacterales	Enterobacteriaceae	Escherichia	Escherichia coli APEC O1	H4035	Ulcerative colitis	1.78389
Ulcerative colitis	MTG	frc	B5YYX4	Proteobacteria	Gammaproteobacteria	Enterobacterales	Enterobacteriaceae	Escherichia	Escherichia coli O157:H7 str. EC4115	H4035	Ulcerative colitis	0.270811
Ulcerative colitis	MTS	frc	A0A073JPH8	Firmicutes	Bacilli	Lactobacillales	Lactobacillaceae	Lactobacillus	Lactobacillus reuteri	H4035	Ulcerative colitis	0.0349422
Ulcerative colitis	MTS	frc	A0A087ADU5	Actinobacteria	Actinobacteria	Bifidobacteriales	Bifidobacteriaceae	Bifidobacterium	Bifidobacterium choerinum	H4035	Ulcerative colitis	0.118379
Ulcerative colitis	MTS	frc	A0A0A7I974	Actinobacteria	Actinobacteria	Bifidobacteriales	Bifidobacteriaceae	Bifidobacterium	Bifidobacterium pseudolongum PV8-2	H4035	Ulcerative colitis	0.0417779
Ulcerative colitis	MTS	frc	A0A0L7BLA3	Actinobacteria	Actinobacteria	Bifidobacteriales	Bifidobacteriaceae	Bifidobacterium	Bifidobacterium animalis subsp. animalis MCC 0483	H4035	Ulcerative colitis	0.0864017
Ulcerative colitis	MTS	frc	A0A1B8SW60	Proteobacteria	Gammaproteobacteria	Enterobacterales	Morganellaceae	Providencia	Providencia rettgeri	H4035	Ulcerative colitis	0.0377785
Ulcerative colitis	MTS	frc	A0A2A2EHW6	Actinobacteria	Actinobacteria	Bifidobacteriales	Bifidobacteriaceae	Bifidobacterium	Bifidobacterium criceti	H4035	Ulcerative colitis	0.109229
Ulcerative colitis	MTS	frc	A0A2N3R094	Actinobacteria	Actinobacteria	Bifidobacteriales	Bifidobacteriaceae	Bifidobacterium	Bifidobacterium pseudolongum subsp. pseudolongum	H4035	Ulcerative colitis	0.0348635
Ulcerative colitis	MTS	frc	A0A377BTA6	Proteobacteria	Gammaproteobacteria	Enterobacterales	Enterobacteriaceae	Escherichia	Escherichia coli	H4035	Ulcerative colitis	0.0803176
Ulcerative colitis	MTS	frc	A1ADQ1	Proteobacteria	Gammaproteobacteria	Enterobacterales	Enterobacteriaceae	Escherichia	Escherichia coli APEC O1	H4035	Ulcerative colitis	0.0372101
Ulcerative colitis	MTG	frc	A0A072MW66	Actinobacteria	Actinobacteria	Bifidobacteriales	Bifidobacteriaceae	Bifidobacterium	Bifidobacterium pseudocatenulatum IPLA36007	H4040	Ulcerative colitis	0.142664
Ulcerative colitis	MTG	frc	A0A140NMR5	Proteobacteria	Gammaproteobacteria	Enterobacterales	Morganellaceae	Providencia	Providencia stuartii MRSN 2154	H4040	Ulcerative colitis	0.027724
Ulcerative colitis	MTG	frc	A0A174BHB6	Actinobacteria	Actinobacteria	Bifidobacteriales	Bifidobacteriaceae	Bifidobacterium	Bifidobacterium pseudocatenulatum	H4040	Ulcerative colitis	0.0294457
Ulcerative colitis	MTG	frc	A0A1Q6EPI6	Actinobacteria	Actinobacteria	Bifidobacteriales	Bifidobacteriaceae	Bifidobacterium	Bifidobacterium sp. 56_9_plus	H4040	Ulcerative colitis	0.0223803
Ulcerative colitis	MTG	frc	A0A2V7C257	Candidatus Rokubacteria	NA	NA	NA	NA	Candidatus Rokubacteria bacterium	H4040	Ulcerative colitis	0.0237342
Ulcerative colitis	MTG	frc	A0A377BTA6	Proteobacteria	Gammaproteobacteria	Enterobacterales	Enterobacteriaceae	Escherichia	Escherichia coli	H4040	Ulcerative colitis	0.300547
Ulcerative colitis	MTG	frc	A1ADQ1	Proteobacteria	Gammaproteobacteria	Enterobacterales	Enterobacteriaceae	Escherichia	Escherichia coli APEC O1	H4040	Ulcerative colitis	0.514833
Ulcerative colitis	MTS	frc	A0A377BTA6	Proteobacteria	Gammaproteobacteria	Enterobacterales	Enterobacteriaceae	Escherichia	Escherichia coli	H4040	Ulcerative colitis	0.104506
Ulcerative colitis	MTS	frc	A1ADQ1	Proteobacteria	Gammaproteobacteria	Enterobacterales	Enterobacteriaceae	Escherichia	Escherichia coli APEC O1	H4040	Ulcerative colitis	0.0561102
Ulcerative colitis	MTS	frc	C3X762	Proteobacteria	Betaproteobacteria	Burkholderiales	Oxalobacteraceae	Oxalobacter	Oxalobacter formigenes HOxBLS	H4040	Ulcerative colitis	0.0485282
Ulcerative colitis	MTG	frc	A0A072MW66	Actinobacteria	Actinobacteria	Bifidobacteriales	Bifidobacteriaceae	Bifidobacterium	Bifidobacterium pseudocatenulatum IPLA36007	H4042	Ulcerative colitis	0.0484054
Ulcerative colitis	MTG	frc	A0A1V8Q5N2	Actinobacteria	Actinobacteria	Bifidobacteriales	Bifidobacteriaceae	Bifidobacterium	Bifidobacterium dentium	H4042	Ulcerative colitis	0.143884
Ulcerative colitis	MTG	frc	A0A377BTA6	Proteobacteria	Gammaproteobacteria	Enterobacterales	Enterobacteriaceae	Escherichia	Escherichia coli	H4042	Ulcerative colitis	0.0593671
Ulcerative colitis	MTS	frc	A0A072MW66	Actinobacteria	Actinobacteria	Bifidobacteriales	Bifidobacteriaceae	Bifidobacterium	Bifidobacterium pseudocatenulatum IPLA36007	H4042	Ulcerative colitis	0.0260111
Ulcerative colitis	MTS	frc	A0A1V8Q5N2	Actinobacteria	Actinobacteria	Bifidobacteriales	Bifidobacteriaceae	Bifidobacterium	Bifidobacterium dentium	H4042	Ulcerative colitis	0.0257724
Ulcerative colitis	MTG	frc	A0A072MW66	Actinobacteria	Actinobacteria	Bifidobacteriales	Bifidobacteriaceae	Bifidobacterium	Bifidobacterium pseudocatenulatum IPLA36007	H4044	Ulcerative colitis	0.0585598
Ulcerative colitis	MTG	frc	A0A377BTA6	Proteobacteria	Gammaproteobacteria	Enterobacterales	Enterobacteriaceae	Escherichia	Escherichia coli	H4044	Ulcerative colitis	0.0727846
Ulcerative colitis	MTG	frc	A1ADQ1	Proteobacteria	Gammaproteobacteria	Enterobacterales	Enterobacteriaceae	Escherichia	Escherichia coli APEC O1	H4044	Ulcerative colitis	0.174709
Ulcerative colitis	MTG	frc	A0A1F4JN62	Proteobacteria	Betaproteobacteria	Burkholderiales	NA	NA	Burkholderiales bacterium RIFCSPLOWO2_02_FULL_57_3	M2024	Ulcerative colitis	0.0598557
Ulcerative colitis	MTG	frc	A0A377BTA6	Proteobacteria	Gammaproteobacteria	Enterobacterales	Enterobacteriaceae	Escherichia	Escherichia coli	M2024	Ulcerative colitis	0.0980458
Ulcerative colitis	MTG	frc	A1ADQ1	Proteobacteria	Gammaproteobacteria	Enterobacterales	Enterobacteriaceae	Escherichia	Escherichia coli APEC O1	M2024	Ulcerative colitis	0.709778
Ulcerative colitis	MTG	frc	A0A070SKW5	Proteobacteria	Gammaproteobacteria	Enterobacterales	Enterobacteriaceae	Escherichia	Escherichia coli 2-210-07_S3_C3	M2026	Ulcerative colitis	0.0337531
Ulcerative colitis	MTG	frc	A0A377BTA6	Proteobacteria	Gammaproteobacteria	Enterobacterales	Enterobacteriaceae	Escherichia	Escherichia coli	M2026	Ulcerative colitis	0.0899801
Ulcerative colitis	MTG	frc	A1ADQ1	Proteobacteria	Gammaproteobacteria	Enterobacterales	Enterobacteriaceae	Escherichia	Escherichia coli APEC O1	M2026	Ulcerative colitis	0.10643
Ulcerative colitis	MTS	frc	A0A377BTA6	Proteobacteria	Gammaproteobacteria	Enterobacterales	Enterobacteriaceae	Escherichia	Escherichia coli	M2026	Ulcerative colitis	0.116636
Ulcerative colitis	MTS	frc	C3X762	Proteobacteria	Betaproteobacteria	Burkholderiales	Oxalobacteraceae	Oxalobacter	Oxalobacter formigenes HOxBLS	M2026	Ulcerative colitis	0.705872
Ulcerative colitis	MTG	frc	A0A099YDY1	Firmicutes	Bacilli	Lactobacillales	Lactobacillaceae	Lactobacillus	Lactobacillus mucosae	M2059	Ulcerative colitis	0.121943
Ulcerative colitis	MTG	frc	A0A016XI66	Proteobacteria	Betaproteobacteria	Burkholderiales	Comamonadaceae	Hylemonella	Hylemonella gracilis str. Niagara R	M2064	Ulcerative colitis	0.0452966
Ulcerative colitis	MTG	frc	A0A023Z0D7	Proteobacteria	Gammaproteobacteria	Enterobacterales	Enterobacteriaceae	Escherichia	Escherichia coli O145:H28 str. RM12581	M2064	Ulcerative colitis	0.0486476
Ulcerative colitis	MTG	frc	A0A062XDE4	Firmicutes	Bacilli	Lactobacillales	Lactobacillaceae	Lactobacillus	Lactobacillus animalis	M2064	Ulcerative colitis	0.212359
Ulcerative colitis	MTG	frc	A0A071LN49	Proteobacteria	Gammaproteobacteria	Enterobacterales	Enterobacteriaceae	Mangrovibacter	Mangrovibacter sp. MFB070	M2064	Ulcerative colitis	0.0448703
Ulcerative colitis	MTG	frc	A0A072MW66	Actinobacteria	Actinobacteria	Bifidobacteriales	Bifidobacteriaceae	Bifidobacterium	Bifidobacterium pseudocatenulatum IPLA36007	M2064	Ulcerative colitis	0.0392736
Ulcerative colitis	MTG	frc	A0A087QB11	Firmicutes	Bacilli	Lactobacillales	Lactobacillaceae	Lactobacillus	Lactobacillus gasseri SV-16A-US	M2064	Ulcerative colitis	0.471427
Ulcerative colitis	MTG	frc	A0A0A7I974	Actinobacteria	Actinobacteria	Bifidobacteriales	Bifidobacteriaceae	Bifidobacterium	Bifidobacterium pseudolongum PV8-2	M2064	Ulcerative colitis	0.0382122
Ulcerative colitis	MTG	frc	A0A1B7JUA8	Proteobacteria	Gammaproteobacteria	Enterobacterales	Morganellaceae	Providencia	Providencia heimbachae ATCC 35613	M2064	Ulcerative colitis	0.045841
Ulcerative colitis	MTG	frc	A0A1V3Y246	Firmicutes	Bacilli	Lactobacillales	Lactobacillaceae	Lactobacillus	Lactobacillus gasseri	M2064	Ulcerative colitis	0.0857485
Ulcerative colitis	MTG	frc	A0A1V8Q5N2	Actinobacteria	Actinobacteria	Bifidobacteriales	Bifidobacteriaceae	Bifidobacterium	Bifidobacterium dentium	M2064	Ulcerative colitis	0.0972392
Ulcerative colitis	MTG	frc	A0A1Y0E341	Firmicutes	Bacilli	Lactobacillales	Lactobacillaceae	Lactobacillus	Lactobacillus gasseri	M2064	Ulcerative colitis	0.0651536
Ulcerative colitis	MTG	frc	A0A2S8JKC0	Proteobacteria	Gammaproteobacteria	Enterobacterales	Enterobacteriaceae	Escherichia	Escherichia coli	M2064	Ulcerative colitis	0.045841
Ulcerative colitis	MTG	frc	A0A2V1J0Z5	Bacteroidetes	Bacteroidia	Bacteroidales	Muribaculaceae	NA	Muribaculaceae bacterium DSM 100764	M2064	Ulcerative colitis	0.038105
Ulcerative colitis	MTG	frc	A0A2X5G0L0	Proteobacteria	Gammaproteobacteria	Enterobacterales	Enterobacteriaceae	Escherichia	Escherichia coli	M2064	Ulcerative colitis	0.211738
Ulcerative colitis	MTG	frc	A0A328X6L1	Proteobacteria	Betaproteobacteria	Burkholderiales	Burkholderiaceae	Paraburkholderia	Paraburkholderia unamae	M2064	Ulcerative colitis	0.045841
Ulcerative colitis	MTG	frc	A0A354HZG4	Bacteroidetes	Bacteroidia	Bacteroidales	Porphyromonadaceae	NA	Porphyromonadaceae bacterium	M2064	Ulcerative colitis	0.0370221
Ulcerative colitis	MTG	frc	A0A377BTA6	Proteobacteria	Gammaproteobacteria	Enterobacterales	Enterobacteriaceae	Escherichia	Escherichia coli	M2064	Ulcerative colitis	2.3589
Ulcerative colitis	MTG	frc	A1ADQ1	Proteobacteria	Gammaproteobacteria	Enterobacterales	Enterobacteriaceae	Escherichia	Escherichia coli APEC O1	M2064	Ulcerative colitis	6.17602
Ulcerative colitis	MTG	frc	C3X2D4	Proteobacteria	Betaproteobacteria	Burkholderiales	Oxalobacteraceae	Oxalobacter	Oxalobacter formigenes HOxBLS	M2064	Ulcerative colitis	0.163112
Ulcerative colitis	MTG	frc	C3X762	Proteobacteria	Betaproteobacteria	Burkholderiales	Oxalobacteraceae	Oxalobacter	Oxalobacter formigenes HOxBLS	M2064	Ulcerative colitis	0.274061
Ulcerative colitis	MTG	frc	H1RYM1	Proteobacteria	Betaproteobacteria	Burkholderiales	Burkholderiaceae	Cupriavidus	Cupriavidus basilensis OR16	M2064	Ulcerative colitis	0.0478932
Ulcerative colitis	MTG	frc	O06644	Proteobacteria	Betaproteobacteria	Burkholderiales	Oxalobacteraceae	Oxalobacter	Oxalobacter formigenes	M2064	Ulcerative colitis	0.0414361
Ulcerative colitis	MTG	frc	Q3YZF6	Proteobacteria	Gammaproteobacteria	Enterobacterales	Enterobacteriaceae	Shigella	Shigella sonnei Ss046	M2064	Ulcerative colitis	0.0542046
Ulcerative colitis	MTG	frc	Q8FFE8	Proteobacteria	Gammaproteobacteria	Enterobacterales	Enterobacteriaceae	Escherichia	Escherichia coli CFT073	M2064	Ulcerative colitis	0.209678
Ulcerative colitis	MTG	frc	V0UR98	Proteobacteria	Gammaproteobacteria	Enterobacterales	Enterobacteriaceae	Escherichia	Escherichia coli 908519	M2064	Ulcerative colitis	0.0305228
Ulcerative colitis	MTS	frc	A0A377BTA6	Proteobacteria	Gammaproteobacteria	Enterobacterales	Enterobacteriaceae	Escherichia	Escherichia coli	M2064	Ulcerative colitis	0.350293
Ulcerative colitis	MTS	frc	A1ADQ1	Proteobacteria	Gammaproteobacteria	Enterobacterales	Enterobacteriaceae	Escherichia	Escherichia coli APEC O1	M2064	Ulcerative colitis	0.110457
Ulcerative colitis	MTS	frc	C3X2D4	Proteobacteria	Betaproteobacteria	Burkholderiales	Oxalobacteraceae	Oxalobacter	Oxalobacter formigenes HOxBLS	M2064	Ulcerative colitis	0.374696
Ulcerative colitis	MTS	frc	C3X762	Proteobacteria	Betaproteobacteria	Burkholderiales	Oxalobacteraceae	Oxalobacter	Oxalobacter formigenes HOxBLS	M2064	Ulcerative colitis	0.384295
Ulcerative colitis	MTS	frc	O06644	Proteobacteria	Betaproteobacteria	Burkholderiales	Oxalobacteraceae	Oxalobacter	Oxalobacter formigenes	M2064	Ulcerative colitis	0.0546502
Ulcerative colitis	MTG	frc	A0A016XI66	Proteobacteria	Betaproteobacteria	Burkholderiales	Comamonadaceae	Hylemonella	Hylemonella gracilis str. Niagara R	M2069	Ulcerative colitis	0.0187186
Ulcerative colitis	MTG	frc	A0A070SKW5	Proteobacteria	Gammaproteobacteria	Enterobacterales	Enterobacteriaceae	Escherichia	Escherichia coli 2-210-07_S3_C3	M2069	Ulcerative colitis	0.689722
Ulcerative colitis	MTG	frc	A0A085GUA8	Proteobacteria	Gammaproteobacteria	Enterobacterales	Hafniaceae	Hafnia	Hafnia alvei ATCC 13337	M2069	Ulcerative colitis	0.0309232
Ulcerative colitis	MTG	frc	A0A087B567	Actinobacteria	Actinobacteria	Bifidobacteriales	Bifidobacteriaceae	Bifidobacterium	Bifidobacterium cuniculi	M2069	Ulcerative colitis	0.0650524
Ulcerative colitis	MTG	frc	A0A0A7I974	Actinobacteria	Actinobacteria	Bifidobacteriales	Bifidobacteriaceae	Bifidobacterium	Bifidobacterium pseudolongum PV8-2	M2069	Ulcerative colitis	0.0421994
Ulcerative colitis	MTG	frc	A0A0E1SU03	Proteobacteria	Gammaproteobacteria	Enterobacterales	Enterobacteriaceae	Escherichia	Escherichia coli 53638	M2069	Ulcerative colitis	0.0189436
Ulcerative colitis	MTG	frc	A0A0H2QFH1	Proteobacteria	Gammaproteobacteria	Enterobacterales	Morganellaceae	Moellerella	Moellerella wisconsensis	M2069	Ulcerative colitis	0.0189436
Ulcerative colitis	MTG	frc	A0A1B7KKZ3	Proteobacteria	Gammaproteobacteria	Enterobacterales	Hafniaceae	Obesumbacterium	Obesumbacterium proteus ATCC 12841	M2069	Ulcerative colitis	0.0228439
Ulcerative colitis	MTG	frc	A0A1C7CW93	Proteobacteria	Gammaproteobacteria	Enterobacterales	Enterobacteriaceae	Escherichia	Escherichia coli	M2069	Ulcerative colitis	0.018853
Ulcerative colitis	MTG	frc	A0A1Q8BQG0	Actinobacteria	Actinobacteria	Pseudonocardiales	Pseudonocardiaceae	Actinophytocola	Actinophytocola xinjiangensis	M2069	Ulcerative colitis	0.0426381
Ulcerative colitis	MTG	frc	A0A209AX82	Proteobacteria	Gammaproteobacteria	Enterobacterales	Yersiniaceae	Yersinia	Yersinia frederiksenii	M2069	Ulcerative colitis	0.0191741
Ulcerative colitis	MTG	frc	A0A2X5G0L0	Proteobacteria	Gammaproteobacteria	Enterobacterales	Enterobacteriaceae	Escherichia	Escherichia coli	M2069	Ulcerative colitis	0.419086
Ulcerative colitis	MTG	frc	A0A377BTA6	Proteobacteria	Gammaproteobacteria	Enterobacterales	Enterobacteriaceae	Escherichia	Escherichia coli	M2069	Ulcerative colitis	3.7457
Ulcerative colitis	MTG	frc	A1ADQ1	Proteobacteria	Gammaproteobacteria	Enterobacterales	Enterobacteriaceae	Escherichia	Escherichia coli APEC O1	M2069	Ulcerative colitis	4.96448
Ulcerative colitis	MTG	frc	Q8FFE8	Proteobacteria	Gammaproteobacteria	Enterobacterales	Enterobacteriaceae	Escherichia	Escherichia coli CFT073	M2069	Ulcerative colitis	0.0737834
Ulcerative colitis	MTS	frc	A0A377BTA6	Proteobacteria	Gammaproteobacteria	Enterobacterales	Enterobacteriaceae	Escherichia	Escherichia coli	M2069	Ulcerative colitis	0.117089
Ulcerative colitis	MTS	frc	A1ADQ1	Proteobacteria	Gammaproteobacteria	Enterobacterales	Enterobacteriaceae	Escherichia	Escherichia coli APEC O1	M2069	Ulcerative colitis	0.0293668
Ulcerative colitis	MTG	frc	A0A087ADU5	Actinobacteria	Actinobacteria	Bifidobacteriales	Bifidobacteriaceae	Bifidobacterium	Bifidobacterium choerinum	M2071	Ulcerative colitis	0.0264558
Ulcerative colitis	MTG	frc	A0A087QB11	Firmicutes	Bacilli	Lactobacillales	Lactobacillaceae	Lactobacillus	Lactobacillus gasseri SV-16A-US	M2071	Ulcerative colitis	0.0403958
Ulcerative colitis	MTG	frc	A0A0L7BLA3	Actinobacteria	Actinobacteria	Bifidobacteriales	Bifidobacteriaceae	Bifidobacterium	Bifidobacterium animalis subsp. animalis MCC 0483	M2071	Ulcerative colitis	0.0265156
Ulcerative colitis	MTG	frc	A0A0R1UH43	Firmicutes	Bacilli	Lactobacillales	Lactobacillaceae	Lactobacillus	Lactobacillus kalixensis DSM 16043	M2071	Ulcerative colitis	0.0407565
Ulcerative colitis	MTG	frc	A0A2A2EHW6	Actinobacteria	Actinobacteria	Bifidobacteriales	Bifidobacteriaceae	Bifidobacterium	Bifidobacterium criceti	M2071	Ulcerative colitis	0.0526744
Ulcerative colitis	MTG	frc	A0A377BTA6	Proteobacteria	Gammaproteobacteria	Enterobacterales	Enterobacteriaceae	Escherichia	Escherichia coli	M2071	Ulcerative colitis	0.137928
Ulcerative colitis	MTG	frc	A1ADQ1	Proteobacteria	Gammaproteobacteria	Enterobacterales	Enterobacteriaceae	Escherichia	Escherichia coli APEC O1	M2071	Ulcerative colitis	0.440647
Ulcerative colitis	MTG	frc	G1U9U4	Firmicutes	Bacilli	Lactobacillales	Lactobacillaceae	Lactobacillus	Lactobacillus acidophilus	M2071	Ulcerative colitis	0.0410313
Ulcerative colitis	MTS	frc	A0A087ADU5	Actinobacteria	Actinobacteria	Bifidobacteriales	Bifidobacteriaceae	Bifidobacterium	Bifidobacterium choerinum	M2071	Ulcerative colitis	0.0379472
Ulcerative colitis	MTS	frc	A0A0L7BLA3	Actinobacteria	Actinobacteria	Bifidobacteriales	Bifidobacteriaceae	Bifidobacterium	Bifidobacterium animalis subsp. animalis MCC 0483	M2071	Ulcerative colitis	0.0380328
Ulcerative colitis	MTG	frc	A0A071LN49	Proteobacteria	Gammaproteobacteria	Enterobacterales	Enterobacteriaceae	Mangrovibacter	Mangrovibacter sp. MFB070	M2083	Ulcerative colitis	0.0205363
Ulcerative colitis	MTG	frc	A0A0L7ANW7	Proteobacteria	Gammaproteobacteria	Enterobacterales	Enterobacteriaceae	Escherichia	Escherichia coli	M2083	Ulcerative colitis	0.0209806
Ulcerative colitis	MTG	frc	A0A1R0TWN0	Actinobacteria	Actinobacteria	Corynebacteriales	Mycobacteriaceae	Mycolicibacter	Mycolicibacter heraklionensis	M2083	Ulcerative colitis	0.0205363
Ulcerative colitis	MTG	frc	A0A377BTA6	Proteobacteria	Gammaproteobacteria	Enterobacterales	Enterobacteriaceae	Escherichia	Escherichia coli	M2083	Ulcerative colitis	2.90931
Ulcerative colitis	MTG	frc	A1ADQ1	Proteobacteria	Gammaproteobacteria	Enterobacterales	Enterobacteriaceae	Escherichia	Escherichia coli APEC O1	M2083	Ulcerative colitis	1.62407
Ulcerative colitis	MTG	frc	B5YYX4	Proteobacteria	Gammaproteobacteria	Enterobacterales	Enterobacteriaceae	Escherichia	Escherichia coli O157:H7 str. EC4115	M2083	Ulcerative colitis	0.0839224
Ulcerative colitis	MTS	frc	A0A377BTA6	Proteobacteria	Gammaproteobacteria	Enterobacterales	Enterobacteriaceae	Escherichia	Escherichia coli	M2083	Ulcerative colitis	0.148735
Ulcerative colitis	MTG	frc	A0A072MW66	Actinobacteria	Actinobacteria	Bifidobacteriales	Bifidobacteriaceae	Bifidobacterium	Bifidobacterium pseudocatenulatum IPLA36007	M2103	Ulcerative colitis	0.155453
Ulcerative colitis	MTG	frc	A0A1B1SBJ2	Bacteroidetes	Bacteroidia	Bacteroidales	Muribaculaceae	Muribaculum	Muribaculum intestinale	M2103	Ulcerative colitis	0.0333802
Ulcerative colitis	MTG	frc	A0A1F4IAS5	Proteobacteria	Betaproteobacteria	Burkholderiales	NA	NA	Burkholderiales bacterium RIFCSPHIGHO2_12_FULL_61_	M2103	Ulcerative colitis	0.0416648
Ulcerative colitis	MTG	frc	A0A1Q6EIZ9	Bacteroidetes	Bacteroidia	Bacteroidales	NA	NA	Bacteroidales bacterium 52_46	M2103	Ulcerative colitis	0.100602
Ulcerative colitis	MTG	frc	A0A1Q6EPI6	Actinobacteria	Actinobacteria	Bifidobacteriales	Bifidobacteriaceae	Bifidobacterium	Bifidobacterium sp. 56_9_plus	M2103	Ulcerative colitis	0.0322699
Ulcerative colitis	MTG	frc	A0A2V1IPP0	Bacteroidetes	Bacteroidia	Bacteroidales	Muribaculaceae	NA	Muribaculaceae bacterium DSM 103720	M2103	Ulcerative colitis	0.301112
Ulcerative colitis	MTG	frc	A0A2V1J0Z5	Bacteroidetes	Bacteroidia	Bacteroidales	Muribaculaceae	NA	Muribaculaceae bacterium DSM 100764	M2103	Ulcerative colitis	0.336892
Ulcerative colitis	MTG	frc	A0A354HZG4	Bacteroidetes	Bacteroidia	Bacteroidales	Porphyromonadaceae	NA	Porphyromonadaceae bacterium	M2103	Ulcerative colitis	0.270139
Ulcerative colitis	MTG	frc	A0A355Z7A2	Bacteroidetes	Bacteroidia	Bacteroidales	Porphyromonadaceae	NA	Porphyromonadaceae bacterium	M2103	Ulcerative colitis	0.134757
Ulcerative colitis	MTG	frc	A0A377BTA6	Proteobacteria	Gammaproteobacteria	Enterobacterales	Enterobacteriaceae	Escherichia	Escherichia coli	M2103	Ulcerative colitis	0.561106
Ulcerative colitis	MTG	frc	A1ADQ1	Proteobacteria	Gammaproteobacteria	Enterobacterales	Enterobacteriaceae	Escherichia	Escherichia coli APEC O1	M2103	Ulcerative colitis	1.49935
Ulcerative colitis	MTG	frc	C3X2D4	Proteobacteria	Betaproteobacteria	Burkholderiales	Oxalobacteraceae	Oxalobacter	Oxalobacter formigenes HOxBLS	M2103	Ulcerative colitis	0.207337
Ulcerative colitis	MTG	frc	C3X762	Proteobacteria	Betaproteobacteria	Burkholderiales	Oxalobacteraceae	Oxalobacter	Oxalobacter formigenes HOxBLS	M2103	Ulcerative colitis	0.359461
Ulcerative colitis	MTG	frc	H1RYM1	Proteobacteria	Betaproteobacteria	Burkholderiales	Burkholderiaceae	Cupriavidus	Cupriavidus basilensis OR16	M2103	Ulcerative colitis	0.0208324
Ulcerative colitis	MTG	frc	O06644	Proteobacteria	Betaproteobacteria	Burkholderiales	Oxalobacteraceae	Oxalobacter	Oxalobacter formigenes	M2103	Ulcerative colitis	0.124695
Ulcerative colitis	MTG	frc	R5AR18	Bacteroidetes	Bacteroidia	Bacteroidales	Prevotellaceae	Prevotella	Prevotella sp. CAG:1031	M2103	Ulcerative colitis	0.233661
Ulcerative colitis	MTG	frc	R5AXI8	Bacteroidetes	Bacteroidia	Bacteroidales	Bacteroidaceae	Bacteroides	Bacteroides sp. CAG:927	M2103	Ulcerative colitis	0.0337674
Ulcerative colitis	MTS	frc	A0A0D7F737	Proteobacteria	Alphaproteobacteria	Rhizobiales	Bradyrhizobiaceae	Rhodopseudomonas	Rhodopseudomonas palustris	M2103	Ulcerative colitis	0.0126152
Ulcerative colitis	MTS	frc	A0A1F4IAS5	Proteobacteria	Betaproteobacteria	Burkholderiales	NA	NA	Burkholderiales bacterium RIFCSPHIGHO2_12_FULL_61_	M2103	Ulcerative colitis	0.0633763
Ulcerative colitis	MTS	frc	A0A1Q6EIZ9	Bacteroidetes	Bacteroidia	Bacteroidales	NA	NA	Bacteroidales bacterium 52_46	M2103	Ulcerative colitis	0.0711535
Ulcerative colitis	MTS	frc	A0A2A2YVB9	Actinobacteria	Actinobacteria	Streptomycetales	Streptomycetaceae	Streptomyces	Streptomyces sp. SA15	M2103	Ulcerative colitis	0.0254718
Ulcerative colitis	MTS	frc	A0A2V1J0Z5	Bacteroidetes	Bacteroidia	Bacteroidales	Muribaculaceae	NA	Muribaculaceae bacterium DSM 100764	M2103	Ulcerative colitis	0.142966
Ulcerative colitis	MTS	frc	A0A354HZG4	Bacteroidetes	Bacteroidia	Bacteroidales	Porphyromonadaceae	NA	Porphyromonadaceae bacterium	M2103	Ulcerative colitis	0.143297
Ulcerative colitis	MTS	frc	A0A355Z7A2	Bacteroidetes	Bacteroidia	Bacteroidales	Porphyromonadaceae	NA	Porphyromonadaceae bacterium	M2103	Ulcerative colitis	0.142966
Ulcerative colitis	MTS	frc	C3X2D4	Proteobacteria	Betaproteobacteria	Burkholderiales	Oxalobacteraceae	Oxalobacter	Oxalobacter formigenes HOxBLS	M2103	Ulcerative colitis	0.216994
Ulcerative colitis	MTS	frc	C3X762	Proteobacteria	Betaproteobacteria	Burkholderiales	Oxalobacteraceae	Oxalobacter	Oxalobacter formigenes HOxBLS	M2103	Ulcerative colitis	0.591971
Ulcerative colitis	MTS	frc	O06644	Proteobacteria	Betaproteobacteria	Burkholderiales	Oxalobacteraceae	Oxalobacter	Oxalobacter formigenes	M2103	Ulcerative colitis	0.950955
Ulcerative colitis	MTS	frc	R5AR18	Bacteroidetes	Bacteroidia	Bacteroidales	Prevotellaceae	Prevotella	Prevotella sp. CAG:1031	M2103	Ulcerative colitis	0.141654
Ulcerative colitis	MTS	frc	R5AXI8	Bacteroidetes	Bacteroidia	Bacteroidales	Bacteroidaceae	Bacteroides	Bacteroides sp. CAG:927	M2103	Ulcerative colitis	0.221122
Ulcerative colitis	MTG	frc	A0A087ADU5	Actinobacteria	Actinobacteria	Bifidobacteriales	Bifidobacteriaceae	Bifidobacterium	Bifidobacterium choerinum	P6012	Ulcerative colitis	0.112533
Ulcerative colitis	MTG	frc	A0A087B567	Actinobacteria	Actinobacteria	Bifidobacteriales	Bifidobacteriaceae	Bifidobacterium	Bifidobacterium cuniculi	P6012	Ulcerative colitis	0.0281968
Ulcerative colitis	MTG	frc	A0A0L7BLA3	Actinobacteria	Actinobacteria	Bifidobacteriales	Bifidobacteriaceae	Bifidobacterium	Bifidobacterium animalis subsp. animalis MCC 0483	P6012	Ulcerative colitis	0.0281968
Ulcerative colitis	MTG	frc	A0A072MW66	Actinobacteria	Actinobacteria	Bifidobacteriales	Bifidobacteriaceae	Bifidobacterium	Bifidobacterium pseudocatenulatum IPLA36007	P6013	Ulcerative colitis	0.0405096
Ulcerative colitis	MTG	frc	A0A1V8Q5N2	Actinobacteria	Actinobacteria	Bifidobacteriales	Bifidobacteriaceae	Bifidobacterium	Bifidobacterium dentium	P6013	Ulcerative colitis	0.0288831
Ulcerative colitis	MTG	frc	A0A377BTA6	Proteobacteria	Gammaproteobacteria	Enterobacterales	Enterobacteriaceae	Escherichia	Escherichia coli	P6013	Ulcerative colitis	0.259842
Ulcerative colitis	MTG	frc	A1ADQ1	Proteobacteria	Gammaproteobacteria	Enterobacterales	Enterobacteriaceae	Escherichia	Escherichia coli APEC O1	P6013	Ulcerative colitis	1.05738
Ulcerative colitis	MTG	frc	G1U9U4	Firmicutes	Bacilli	Lactobacillales	Lactobacillaceae	Lactobacillus	Lactobacillus acidophilus	P6013	Ulcerative colitis	0.0497386
Ulcerative colitis	MTG	frc	A0A062XDE4	Firmicutes	Bacilli	Lactobacillales	Lactobacillaceae	Lactobacillus	Lactobacillus animalis	P6035	Ulcerative colitis	0.0684391
Ulcerative colitis	MTG	frc	A0A072MW66	Actinobacteria	Actinobacteria	Bifidobacteriales	Bifidobacteriaceae	Bifidobacterium	Bifidobacterium pseudocatenulatum IPLA36007	P6035	Ulcerative colitis	0.02463
Ulcerative colitis	MTG	frc	A0A087ADU5	Actinobacteria	Actinobacteria	Bifidobacteriales	Bifidobacteriaceae	Bifidobacterium	Bifidobacterium choerinum	P6035	Ulcerative colitis	0.123031
Ulcerative colitis	MTG	frc	A0A087B567	Actinobacteria	Actinobacteria	Bifidobacteriales	Bifidobacteriaceae	Bifidobacterium	Bifidobacterium cuniculi	P6035	Ulcerative colitis	0.0239518
Ulcerative colitis	MTG	frc	A0A087QB11	Firmicutes	Bacilli	Lactobacillales	Lactobacillaceae	Lactobacillus	Lactobacillus gasseri SV-16A-US	P6035	Ulcerative colitis	0.0912521
Ulcerative colitis	MTG	frc	A0A0R1HAW1	Firmicutes	Bacilli	Lactobacillales	Lactobacillaceae	Lactobacillus	Lactobacillus amylovorus DSM 20531	P6035	Ulcerative colitis	0.0232241
Ulcerative colitis	MTG	frc	A0A1V8Q5N2	Actinobacteria	Actinobacteria	Bifidobacteriales	Bifidobacteriaceae	Bifidobacterium	Bifidobacterium dentium	P6035	Ulcerative colitis	0.12412
Ulcerative colitis	MTG	frc	A0A2A2EHW6	Actinobacteria	Actinobacteria	Bifidobacteriales	Bifidobacteriaceae	Bifidobacterium	Bifidobacterium criceti	P6035	Ulcerative colitis	0.122479
Ulcerative colitis	MTG	frc	A0A377BTA6	Proteobacteria	Gammaproteobacteria	Enterobacterales	Enterobacteriaceae	Escherichia	Escherichia coli	P6035	Ulcerative colitis	0.0238216
Ulcerative colitis	MTG	frc	A0A377BTA6	Proteobacteria	Gammaproteobacteria	Enterobacterales	Enterobacteriaceae	Escherichia	Escherichia coli	P6038	Ulcerative colitis	0.125665
Ulcerative colitis	MTG	frc	A1ADQ1	Proteobacteria	Gammaproteobacteria	Enterobacterales	Enterobacteriaceae	Escherichia	Escherichia coli APEC O1	P6038	Ulcerative colitis	0.16466
Ulcerative colitis	MTG	frc	B7MY33	Proteobacteria	Gammaproteobacteria	Enterobacterales	Enterobacteriaceae	Escherichia	Escherichia coli ED1a	P6038	Ulcerative colitis	0.0754074
Crohn's Disease	MTG	oxc	D3R6V8	Actinobacteria	Actinobacteria	Bifidobacteriales	Bifidobacteriaceae	Bifidobacterium	Bifidobacterium animalis subsp. lactis BB-12	C2014	Crohn's Disease	0.0305331
Crohn's Disease	MTG	oxc	P0AFI0	Proteobacteria	Gammaproteobacteria	Enterobacterales	Enterobacteriaceae	Escherichia	Escherichia coli K-12	C2014	Crohn's Disease	0.243615
Crohn's Disease	MTG	oxc	A0A029HTY6	Proteobacteria	Gammaproteobacteria	Enterobacterales	Enterobacteriaceae	Escherichia	Escherichia coli 2-005-03_S4_C3	C2034	Crohn's Disease	0.804497
Crohn's Disease	MTG	oxc	A0A0A7IC61	Actinobacteria	Actinobacteria	Bifidobacteriales	Bifidobacteriaceae	Bifidobacterium	Bifidobacterium pseudolongum PV8-2	C2034	Crohn's Disease	0.0581084
Crohn's Disease	MTG	oxc	A0A1Q6EIX1	Bacteroidetes	Bacteroidia	Bacteroidales	NA	NA	Bacteroidales bacterium 52_46	C2034	Crohn's Disease	0.0611122
Crohn's Disease	MTG	oxc	A0A1V8Q5U8	Actinobacteria	Actinobacteria	Bifidobacteriales	Bifidobacteriaceae	Bifidobacterium	Bifidobacterium dentium	C2034	Crohn's Disease	4.54015
Crohn's Disease	MTG	oxc	A0A243V1A0	Proteobacteria	Gammaproteobacteria	Enterobacterales	Enterobacteriaceae	Escherichia	Escherichia coli	C2034	Crohn's Disease	0.0593148
Crohn's Disease	MTG	oxc	A0A2V1IRU2	Bacteroidetes	Bacteroidia	Bacteroidales	Muribaculaceae	NA	Muribaculaceae bacterium DSM 103720	C2034	Crohn's Disease	0.0614408
Crohn's Disease	MTG	oxc	P0AFI0	Proteobacteria	Gammaproteobacteria	Enterobacterales	Enterobacteriaceae	Escherichia	Escherichia coli K-12	C2034	Crohn's Disease	6.44344
Crohn's Disease	MTG	oxc	A0A073HBG2	Proteobacteria	Gammaproteobacteria	Enterobacterales	Enterobacteriaceae	Escherichia	Escherichia coli 5-366-08_S1_C3	C2086	Crohn's Disease	0.167337
Crohn's Disease	MTG	oxc	A0A080IU12	Proteobacteria	Gammaproteobacteria	Enterobacterales	Enterobacteriaceae	Escherichia	Escherichia coli 1-250-04_S3_C2	C2086	Crohn's Disease	0.234814
Crohn's Disease	MTG	oxc	A0A243V1A0	Proteobacteria	Gammaproteobacteria	Enterobacterales	Enterobacteriaceae	Escherichia	Escherichia coli	C2086	Crohn's Disease	0.137476
Crohn's Disease	MTG	oxc	P0AFI0	Proteobacteria	Gammaproteobacteria	Enterobacterales	Enterobacteriaceae	Escherichia	Escherichia coli K-12	C2086	Crohn's Disease	4.03881
Crohn's Disease	MTG	oxc	A0A029HTY6	Proteobacteria	Gammaproteobacteria	Enterobacterales	Enterobacteriaceae	Escherichia	Escherichia coli 2-005-03_S4_C3	C3001	Crohn's Disease	0.12497
Crohn's Disease	MTG	oxc	A0A080IU12	Proteobacteria	Gammaproteobacteria	Enterobacterales	Enterobacteriaceae	Escherichia	Escherichia coli 1-250-04_S3_C2	C3001	Crohn's Disease	0.0256466
Crohn's Disease	MTG	oxc	A0A174BGS6	Actinobacteria	Actinobacteria	Bifidobacteriales	Bifidobacteriaceae	Bifidobacterium	Bifidobacterium pseudocatenulatum	C3001	Crohn's Disease	0.0555775
Crohn's Disease	MTG	oxc	A0A1B7KKY7	Proteobacteria	Gammaproteobacteria	Enterobacterales	Hafniaceae	Obesumbacterium	Obesumbacterium proteus ATCC 12841	C3001	Crohn's Disease	0.0183653
Crohn's Disease	MTG	oxc	A0A1C7CYK9	Proteobacteria	Gammaproteobacteria	Enterobacterales	Enterobacteriaceae	Escherichia	Escherichia coli	C3001	Crohn's Disease	0.0550959
Crohn's Disease	MTG	oxc	A0A1E3N4A4	Proteobacteria	Gammaproteobacteria	Enterobacterales	Enterobacteriaceae	Shigella	Shigella sp. FC569	C3001	Crohn's Disease	0.0156414
Crohn's Disease	MTG	oxc	A0A1S1HJS7	Proteobacteria	Gammaproteobacteria	Enterobacterales	Morganellaceae	Providencia	Providencia stuartii	C3001	Crohn's Disease	0.0128492
Crohn's Disease	MTG	oxc	A0A209A2Q4	Proteobacteria	Gammaproteobacteria	Enterobacterales	Yersiniaceae	Yersinia	Yersinia frederiksenii	C3001	Crohn's Disease	0.0183653
Crohn's Disease	MTG	oxc	A0A243V1A0	Proteobacteria	Gammaproteobacteria	Enterobacterales	Enterobacteriaceae	Escherichia	Escherichia coli	C3001	Crohn's Disease	0.0959239
Crohn's Disease	MTG	oxc	A0A2I6LF99	Proteobacteria	Gammaproteobacteria	Enterobacterales	Enterobacteriaceae	Escherichia	Escherichia coli	C3001	Crohn's Disease	0.0183653
Crohn's Disease	MTG	oxc	A0A377CTZ5	Proteobacteria	Gammaproteobacteria	Enterobacterales	Enterobacteriaceae	Escherichia	Escherichia coli	C3001	Crohn's Disease	0.0147969
Crohn's Disease	MTG	oxc	P0AFI0	Proteobacteria	Gammaproteobacteria	Enterobacterales	Enterobacteriaceae	Escherichia	Escherichia coli K-12	C3001	Crohn's Disease	1.45746
Crohn's Disease	MTG	oxc	A0A029HTY6	Proteobacteria	Gammaproteobacteria	Enterobacterales	Enterobacteriaceae	Escherichia	Escherichia coli 2-005-03_S4_C3	C3001	Crohn's Disease-L3	0.12497
Crohn's Disease	MTG	oxc	A0A080IU12	Proteobacteria	Gammaproteobacteria	Enterobacterales	Enterobacteriaceae	Escherichia	Escherichia coli 1-250-04_S3_C2	C3001	Crohn's Disease-L3	0.0256466
Crohn's Disease	MTG	oxc	A0A174BGS6	Actinobacteria	Actinobacteria	Bifidobacteriales	Bifidobacteriaceae	Bifidobacterium	Bifidobacterium pseudocatenulatum	C3001	Crohn's Disease-L3	0.0555775
Crohn's Disease	MTG	oxc	A0A1B7KKY7	Proteobacteria	Gammaproteobacteria	Enterobacterales	Hafniaceae	Obesumbacterium	Obesumbacterium proteus ATCC 12841	C3001	Crohn's Disease-L3	0.0183653
Crohn's Disease	MTG	oxc	A0A1C7CYK9	Proteobacteria	Gammaproteobacteria	Enterobacterales	Enterobacteriaceae	Escherichia	Escherichia coli	C3001	Crohn's Disease-L3	0.0550959
Crohn's Disease	MTG	oxc	A0A1E3N4A4	Proteobacteria	Gammaproteobacteria	Enterobacterales	Enterobacteriaceae	Shigella	Shigella sp. FC569	C3001	Crohn's Disease-L3	0.0156414
Crohn's Disease	MTG	oxc	A0A1S1HJS7	Proteobacteria	Gammaproteobacteria	Enterobacterales	Morganellaceae	Providencia	Providencia stuartii	C3001	Crohn's Disease-L3	0.0128492
Crohn's Disease	MTG	oxc	A0A209A2Q4	Proteobacteria	Gammaproteobacteria	Enterobacterales	Yersiniaceae	Yersinia	Yersinia frederiksenii	C3001	Crohn's Disease-L3	0.0183653
Crohn's Disease	MTG	oxc	A0A243V1A0	Proteobacteria	Gammaproteobacteria	Enterobacterales	Enterobacteriaceae	Escherichia	Escherichia coli	C3001	Crohn's Disease-L3	0.0959239
Crohn's Disease	MTG	oxc	A0A2I6LF99	Proteobacteria	Gammaproteobacteria	Enterobacterales	Enterobacteriaceae	Escherichia	Escherichia coli	C3001	Crohn's Disease-L3	0.0183653
Crohn's Disease	MTG	oxc	A0A377CTZ5	Proteobacteria	Gammaproteobacteria	Enterobacterales	Enterobacteriaceae	Escherichia	Escherichia coli	C3001	Crohn's Disease-L3	0.0147969
Crohn's Disease	MTG	oxc	P0AFI0	Proteobacteria	Gammaproteobacteria	Enterobacterales	Enterobacteriaceae	Escherichia	Escherichia coli K-12	C3001	Crohn's Disease-L3	1.45746
Crohn's Disease	MTG	oxc	A0A029HTY6	Proteobacteria	Gammaproteobacteria	Enterobacterales	Enterobacteriaceae	Escherichia	Escherichia coli 2-005-03_S4_C3	C3002	Crohn's Disease	0.0586746
Crohn's Disease	MTG	oxc	A0A0H2V970	Proteobacteria	Gammaproteobacteria	Enterobacterales	Enterobacteriaceae	Escherichia	Escherichia coli CFT073	C3002	Crohn's Disease	0.0408397
Crohn's Disease	MTG	oxc	A0A209A2Q4	Proteobacteria	Gammaproteobacteria	Enterobacterales	Yersiniaceae	Yersinia	Yersinia frederiksenii	C3002	Crohn's Disease	0.0190919
Crohn's Disease	MTG	oxc	A0A209AWU9	Proteobacteria	Gammaproteobacteria	Enterobacterales	Yersiniaceae	Yersinia	Yersinia frederiksenii	C3002	Crohn's Disease	0.0153437
Crohn's Disease	MTG	oxc	A0A243V1A0	Proteobacteria	Gammaproteobacteria	Enterobacterales	Enterobacteriaceae	Escherichia	Escherichia coli	C3002	Crohn's Disease	0.0308996
Crohn's Disease	MTG	oxc	A0A377CTZ5	Proteobacteria	Gammaproteobacteria	Enterobacterales	Enterobacteriaceae	Escherichia	Escherichia coli	C3002	Crohn's Disease	0.0197559
Crohn's Disease	MTG	oxc	P0AFI0	Proteobacteria	Gammaproteobacteria	Enterobacterales	Enterobacteriaceae	Escherichia	Escherichia coli K-12	C3002	Crohn's Disease	0.95262
Crohn's Disease	MTG	oxc	A0A029HTY6	Proteobacteria	Gammaproteobacteria	Enterobacterales	Enterobacteriaceae	Escherichia	Escherichia coli 2-005-03_S4_C3	C3002	Crohn's Disease-L3	0.0586746
Crohn's Disease	MTG	oxc	A0A0H2V970	Proteobacteria	Gammaproteobacteria	Enterobacterales	Enterobacteriaceae	Escherichia	Escherichia coli CFT073	C3002	Crohn's Disease-L3	0.0408397
Crohn's Disease	MTG	oxc	A0A209A2Q4	Proteobacteria	Gammaproteobacteria	Enterobacterales	Yersiniaceae	Yersinia	Yersinia frederiksenii	C3002	Crohn's Disease-L3	0.0190919
Crohn's Disease	MTG	oxc	A0A209AWU9	Proteobacteria	Gammaproteobacteria	Enterobacterales	Yersiniaceae	Yersinia	Yersinia frederiksenii	C3002	Crohn's Disease-L3	0.0153437
Crohn's Disease	MTG	oxc	A0A243V1A0	Proteobacteria	Gammaproteobacteria	Enterobacterales	Enterobacteriaceae	Escherichia	Escherichia coli	C3002	Crohn's Disease-L3	0.0308996
Crohn's Disease	MTG	oxc	A0A377CTZ5	Proteobacteria	Gammaproteobacteria	Enterobacterales	Enterobacteriaceae	Escherichia	Escherichia coli	C3002	Crohn's Disease-L3	0.0197559
Crohn's Disease	MTG	oxc	P0AFI0	Proteobacteria	Gammaproteobacteria	Enterobacterales	Enterobacteriaceae	Escherichia	Escherichia coli K-12	C3002	Crohn's Disease-L3	0.95262
Crohn's Disease	MTG	oxc	A0A029HTY6	Proteobacteria	Gammaproteobacteria	Enterobacterales	Enterobacteriaceae	Escherichia	Escherichia coli 2-005-03_S4_C3	C3007	Crohn's Disease	0.768752
Crohn's Disease	MTG	oxc	A0A070SLK1	Proteobacteria	Gammaproteobacteria	Enterobacterales	Enterobacteriaceae	Escherichia	Escherichia coli 2-210-07_S3_C3	C3007	Crohn's Disease	0.0213087
Crohn's Disease	MTG	oxc	A0A0D8VXR4	Proteobacteria	Gammaproteobacteria	Enterobacterales	Enterobacteriaceae	Escherichia	Escherichia coli	C3007	Crohn's Disease	0.108815
Crohn's Disease	MTG	oxc	A0A0H2QLB1	Proteobacteria	Gammaproteobacteria	Enterobacterales	Morganellaceae	Moellerella	Moellerella wisconsensis	C3007	Crohn's Disease	0.021271
Crohn's Disease	MTG	oxc	A0A1C6PSI5	Actinobacteria	Actinobacteria	Streptomycetales	Streptomycetaceae	Streptomyces	Streptomyces sp. WMMB 322	C3007	Crohn's Disease	0.0223162
Crohn's Disease	MTG	oxc	A0A1C7CYK9	Proteobacteria	Gammaproteobacteria	Enterobacterales	Enterobacteriaceae	Escherichia	Escherichia coli	C3007	Crohn's Disease	0.0220499
Crohn's Disease	MTG	oxc	A0A1E3N4A4	Proteobacteria	Gammaproteobacteria	Enterobacterales	Enterobacteriaceae	Shigella	Shigella sp. FC569	C3007	Crohn's Disease	0.0213087
Crohn's Disease	MTG	oxc	A0A1M2HRZ3	Proteobacteria	Gammaproteobacteria	Enterobacterales	Enterobacteriaceae	Escherichia	Escherichia coli	C3007	Crohn's Disease	0.0241849
Crohn's Disease	MTG	oxc	A0A1S9K2H7	Proteobacteria	Gammaproteobacteria	Enterobacterales	Enterobacteriaceae	Shigella	Shigella dysenteriae	C3007	Crohn's Disease	0.0227911
Crohn's Disease	MTG	oxc	A0A1W9I4Y9	Proteobacteria	NA	NA	NA	NA	Proteobacteria bacterium SG_bin8	C3007	Crohn's Disease	0.0222006
Crohn's Disease	MTG	oxc	A0A209A2Q4	Proteobacteria	Gammaproteobacteria	Enterobacterales	Yersiniaceae	Yersinia	Yersinia frederiksenii	C3007	Crohn's Disease	0.0683731
Crohn's Disease	MTG	oxc	A0A243V1A0	Proteobacteria	Gammaproteobacteria	Enterobacterales	Enterobacteriaceae	Escherichia	Escherichia coli	C3007	Crohn's Disease	0.278667
Crohn's Disease	MTG	oxc	A0A2A7M2F7	Proteobacteria	Gammaproteobacteria	Enterobacterales	Enterobacteriaceae	Escherichia	Escherichia coli	C3007	Crohn's Disease	0.0227911
Crohn's Disease	MTG	oxc	A0A2X5RHE7	Proteobacteria	Gammaproteobacteria	Enterobacterales	Enterobacteriaceae	Escherichia	Escherichia coli	C3007	Crohn's Disease	0.0227911
Crohn's Disease	MTG	oxc	A0A366V745	Proteobacteria	Gammaproteobacteria	Enterobacterales	Enterobacteriaceae	Escherichia	Escherichia coli	C3007	Crohn's Disease	0.0213087
Crohn's Disease	MTG	oxc	A0A369EGU3	Proteobacteria	Gammaproteobacteria	Enterobacterales	Enterobacteriaceae	Escherichia	Escherichia coli	C3007	Crohn's Disease	0.0227911
Crohn's Disease	MTG	oxc	A0A377CTZ5	Proteobacteria	Gammaproteobacteria	Enterobacterales	Enterobacteriaceae	Escherichia	Escherichia coli	C3007	Crohn's Disease	0.026675
Crohn's Disease	MTG	oxc	I6CIJ6	Proteobacteria	Gammaproteobacteria	Enterobacterales	Enterobacteriaceae	Shigella	Shigella flexneri K-315	C3007	Crohn's Disease	0.0216933
Crohn's Disease	MTG	oxc	P0AFI0	Proteobacteria	Gammaproteobacteria	Enterobacterales	Enterobacteriaceae	Escherichia	Escherichia coli K-12	C3007	Crohn's Disease	16.1173
Crohn's Disease	MTG	oxc	V6FX87	Proteobacteria	Gammaproteobacteria	Enterobacterales	Enterobacteriaceae	Escherichia	Escherichia coli 99.0741	C3007	Crohn's Disease	0.0220499
Crohn's Disease	MTG	oxc	A0A029HTY6	Proteobacteria	Gammaproteobacteria	Enterobacterales	Enterobacteriaceae	Escherichia	Escherichia coli 2-005-03_S4_C3	C3007	Crohn's Disease-nonL3	0.768752
Crohn's Disease	MTG	oxc	A0A070SLK1	Proteobacteria	Gammaproteobacteria	Enterobacterales	Enterobacteriaceae	Escherichia	Escherichia coli 2-210-07_S3_C3	C3007	Crohn's Disease-nonL3	0.0213087
Crohn's Disease	MTG	oxc	A0A0D8VXR4	Proteobacteria	Gammaproteobacteria	Enterobacterales	Enterobacteriaceae	Escherichia	Escherichia coli	C3007	Crohn's Disease-nonL3	0.108815
Crohn's Disease	MTG	oxc	A0A0H2QLB1	Proteobacteria	Gammaproteobacteria	Enterobacterales	Morganellaceae	Moellerella	Moellerella wisconsensis	C3007	Crohn's Disease-nonL3	0.021271
Crohn's Disease	MTG	oxc	A0A1C6PSI5	Actinobacteria	Actinobacteria	Streptomycetales	Streptomycetaceae	Streptomyces	Streptomyces sp. WMMB 322	C3007	Crohn's Disease-nonL3	0.0223162
Crohn's Disease	MTG	oxc	A0A1C7CYK9	Proteobacteria	Gammaproteobacteria	Enterobacterales	Enterobacteriaceae	Escherichia	Escherichia coli	C3007	Crohn's Disease-nonL3	0.0220499
Crohn's Disease	MTG	oxc	A0A1E3N4A4	Proteobacteria	Gammaproteobacteria	Enterobacterales	Enterobacteriaceae	Shigella	Shigella sp. FC569	C3007	Crohn's Disease-nonL3	0.0213087
Crohn's Disease	MTG	oxc	A0A1M2HRZ3	Proteobacteria	Gammaproteobacteria	Enterobacterales	Enterobacteriaceae	Escherichia	Escherichia coli	C3007	Crohn's Disease-nonL3	0.0241849
Crohn's Disease	MTG	oxc	A0A1S9K2H7	Proteobacteria	Gammaproteobacteria	Enterobacterales	Enterobacteriaceae	Shigella	Shigella dysenteriae	C3007	Crohn's Disease-nonL3	0.0227911
Crohn's Disease	MTG	oxc	A0A1W9I4Y9	Proteobacteria	NA	NA	NA	NA	Proteobacteria bacterium SG_bin8	C3007	Crohn's Disease-nonL3	0.0222006
Crohn's Disease	MTG	oxc	A0A209A2Q4	Proteobacteria	Gammaproteobacteria	Enterobacterales	Yersiniaceae	Yersinia	Yersinia frederiksenii	C3007	Crohn's Disease-nonL3	0.0683731
Crohn's Disease	MTG	oxc	A0A243V1A0	Proteobacteria	Gammaproteobacteria	Enterobacterales	Enterobacteriaceae	Escherichia	Escherichia coli	C3007	Crohn's Disease-nonL3	0.278667
Crohn's Disease	MTG	oxc	A0A2A7M2F7	Proteobacteria	Gammaproteobacteria	Enterobacterales	Enterobacteriaceae	Escherichia	Escherichia coli	C3007	Crohn's Disease-nonL3	0.0227911
Crohn's Disease	MTG	oxc	A0A2X5RHE7	Proteobacteria	Gammaproteobacteria	Enterobacterales	Enterobacteriaceae	Escherichia	Escherichia coli	C3007	Crohn's Disease-nonL3	0.0227911
Crohn's Disease	MTG	oxc	A0A366V745	Proteobacteria	Gammaproteobacteria	Enterobacterales	Enterobacteriaceae	Escherichia	Escherichia coli	C3007	Crohn's Disease-nonL3	0.0213087
Crohn's Disease	MTG	oxc	A0A369EGU3	Proteobacteria	Gammaproteobacteria	Enterobacterales	Enterobacteriaceae	Escherichia	Escherichia coli	C3007	Crohn's Disease-nonL3	0.0227911
Crohn's Disease	MTG	oxc	A0A377CTZ5	Proteobacteria	Gammaproteobacteria	Enterobacterales	Enterobacteriaceae	Escherichia	Escherichia coli	C3007	Crohn's Disease-nonL3	0.026675
Crohn's Disease	MTG	oxc	I6CIJ6	Proteobacteria	Gammaproteobacteria	Enterobacterales	Enterobacteriaceae	Shigella	Shigella flexneri K-315	C3007	Crohn's Disease-nonL3	0.0216933
Crohn's Disease	MTG	oxc	P0AFI0	Proteobacteria	Gammaproteobacteria	Enterobacterales	Enterobacteriaceae	Escherichia	Escherichia coli K-12	C3007	Crohn's Disease-nonL3	16.1173
Crohn's Disease	MTG	oxc	V6FX87	Proteobacteria	Gammaproteobacteria	Enterobacterales	Enterobacteriaceae	Escherichia	Escherichia coli 99.0741	C3007	Crohn's Disease-nonL3	0.0220499
Crohn's Disease	MTG	oxc	A0A0R2KYZ0	Firmicutes	Bacilli	Lactobacillales	Lactobacillaceae	Lactobacillus	Lactobacillus amylovorus DSM 16698	C3008	Crohn's Disease	0.0255569
Crohn's Disease	MTG	oxc	A0A0R2KYZ0	Firmicutes	Bacilli	Lactobacillales	Lactobacillaceae	Lactobacillus	Lactobacillus amylovorus DSM 16698	C3008	Crohn's Disease-nonL3	0.0255569
Crohn's Disease	MTG	oxc	A0A062XEM5	Firmicutes	Bacilli	Lactobacillales	Lactobacillaceae	Lactobacillus	Lactobacillus animalis	C3009	Crohn's Disease	0.0206614
Crohn's Disease	MTG	oxc	A0A070SLK1	Proteobacteria	Gammaproteobacteria	Enterobacterales	Enterobacteriaceae	Escherichia	Escherichia coli 2-210-07_S3_C3	C3009	Crohn's Disease	0.0219315
Crohn's Disease	MTG	oxc	A0A072MUW5	Actinobacteria	Actinobacteria	Bifidobacteriales	Bifidobacteriaceae	Bifidobacterium	Bifidobacterium pseudocatenulatum IPLA36007	C3009	Crohn's Disease	0.02799
Crohn's Disease	MTG	oxc	A0A073HBG2	Proteobacteria	Gammaproteobacteria	Enterobacterales	Enterobacteriaceae	Escherichia	Escherichia coli 5-366-08_S1_C3	C3009	Crohn's Disease	0.333243
Crohn's Disease	MTG	oxc	A0A073UGW0	Proteobacteria	Gammaproteobacteria	Enterobacterales	Enterobacteriaceae	Escherichia	Escherichia coli 5-366-08_S1_C1	C3009	Crohn's Disease	0.0219315
Crohn's Disease	MTG	oxc	A0A080IU12	Proteobacteria	Gammaproteobacteria	Enterobacterales	Enterobacteriaceae	Escherichia	Escherichia coli 1-250-04_S3_C2	C3009	Crohn's Disease	0.61951
Crohn's Disease	MTG	oxc	A0A087ADU3	Actinobacteria	Actinobacteria	Bifidobacteriales	Bifidobacteriaceae	Bifidobacterium	Bifidobacterium choerinum	C3009	Crohn's Disease	0.048871
Crohn's Disease	MTG	oxc	A0A087B560	Actinobacteria	Actinobacteria	Bifidobacteriales	Bifidobacteriaceae	Bifidobacterium	Bifidobacterium cuniculi	C3009	Crohn's Disease	0.0304424
Crohn's Disease	MTG	oxc	A0A0A0FCC2	Proteobacteria	Gammaproteobacteria	Enterobacterales	Enterobacteriaceae	Escherichia	Escherichia coli G3/10	C3009	Crohn's Disease	0.018288
Crohn's Disease	MTG	oxc	A0A0A7IC61	Actinobacteria	Actinobacteria	Bifidobacteriales	Bifidobacteriaceae	Bifidobacterium	Bifidobacterium pseudolongum PV8-2	C3009	Crohn's Disease	0.0355805
Crohn's Disease	MTG	oxc	A0A0D8WDG1	Proteobacteria	Gammaproteobacteria	Enterobacterales	Enterobacteriaceae	Escherichia	Escherichia coli	C3009	Crohn's Disease	0.657336
Crohn's Disease	MTG	oxc	A0A0L7BLA2	Actinobacteria	Actinobacteria	Bifidobacteriales	Bifidobacteriaceae	Bifidobacterium	Bifidobacterium animalis subsp. animalis MCC 0483	C3009	Crohn's Disease	0.193649
Crohn's Disease	MTG	oxc	A0A0L7CWW3	Actinobacteria	Actinobacteria	Bifidobacteriales	Bifidobacteriaceae	Bifidobacterium	Bifidobacterium animalis subsp. animalis MCC 1489	C3009	Crohn's Disease	0.0797864
Crohn's Disease	MTG	oxc	A0A0Q3BCQ9	Proteobacteria	Gammaproteobacteria	Enterobacterales	Enterobacteriaceae	Escherichia	Escherichia coli	C3009	Crohn's Disease	0.0219315
Crohn's Disease	MTG	oxc	A0A0R1HA15	Firmicutes	Bacilli	Lactobacillales	Lactobacillaceae	Lactobacillus	Lactobacillus amylovorus DSM 20531	C3009	Crohn's Disease	0.103379
Crohn's Disease	MTG	oxc	A0A0R1UID8	Firmicutes	Bacilli	Lactobacillales	Lactobacillaceae	Lactobacillus	Lactobacillus kalixensis DSM 16043	C3009	Crohn's Disease	0.0310387
Crohn's Disease	MTG	oxc	A0A0R2KYZ0	Firmicutes	Bacilli	Lactobacillales	Lactobacillaceae	Lactobacillus	Lactobacillus amylovorus DSM 16698	C3009	Crohn's Disease	0.0802204
Crohn's Disease	MTG	oxc	A0A0U0XH73	Chlamydiae	Chlamydiia	Chlamydiales	Chlamydiaceae	Chlamydia	Chlamydia trachomatis	C3009	Crohn's Disease	0.0387073
Crohn's Disease	MTG	oxc	A0A1E3N4A4	Proteobacteria	Gammaproteobacteria	Enterobacterales	Enterobacteriaceae	Shigella	Shigella sp. FC569	C3009	Crohn's Disease	0.0219315
Crohn's Disease	MTG	oxc	A0A1Q6EIX1	Bacteroidetes	Bacteroidia	Bacteroidales	NA	NA	Bacteroidales bacterium 52_46	C3009	Crohn's Disease	0.0356523
Crohn's Disease	MTG	oxc	A0A1V8Q5U8	Actinobacteria	Actinobacteria	Bifidobacteriales	Bifidobacteriaceae	Bifidobacterium	Bifidobacterium dentium	C3009	Crohn's Disease	0.0620216
Crohn's Disease	MTG	oxc	A0A1W9ZTI0	Actinobacteria	Actinobacteria	Corynebacteriales	Mycobacteriaceae	Mycobacterium	Mycobacterium angelicum	C3009	Crohn's Disease	0.021777
Crohn's Disease	MTG	oxc	A0A209A2Q4	Proteobacteria	Gammaproteobacteria	Enterobacterales	Yersiniaceae	Yersinia	Yersinia frederiksenii	C3009	Crohn's Disease	0.0468828
Crohn's Disease	MTG	oxc	A0A243V1A0	Proteobacteria	Gammaproteobacteria	Enterobacterales	Enterobacteriaceae	Escherichia	Escherichia coli	C3009	Crohn's Disease	0.268826
Crohn's Disease	MTG	oxc	A0A2A2C4U6	Proteobacteria	Gammaproteobacteria	Enterobacterales	Enterobacteriaceae	Escherichia	Escherichia coli	C3009	Crohn's Disease	0.0211743
Crohn's Disease	MTG	oxc	A0A2I6E5U9	Proteobacteria	Gammaproteobacteria	Enterobacterales	Enterobacteriaceae	Enterobacter	Enterobacter cancerogenus	C3009	Crohn's Disease	0.0438629
Crohn's Disease	MTG	oxc	A0A2K0PZR4	Proteobacteria	Gammaproteobacteria	Enterobacterales	Enterobacteriaceae	Shigella	Shigella flexneri	C3009	Crohn's Disease	0.0528278
Crohn's Disease	MTG	oxc	A0A2V1J2C8	Bacteroidetes	Bacteroidia	Bacteroidales	Muribaculaceae	NA	Muribaculaceae bacterium DSM 100764	C3009	Crohn's Disease	0.0359729
Crohn's Disease	MTG	oxc	A0A2X1KIW1	Proteobacteria	Gammaproteobacteria	Enterobacterales	Enterobacteriaceae	Escherichia	Escherichia coli	C3009	Crohn's Disease	0.020067
Crohn's Disease	MTG	oxc	A0A354HZQ6	Bacteroidetes	Bacteroidia	Bacteroidales	Porphyromonadaceae	NA	Porphyromonadaceae bacterium	C3009	Crohn's Disease	0.035844
Crohn's Disease	MTG	oxc	A0A355Z630	Bacteroidetes	Bacteroidia	Bacteroidales	Porphyromonadaceae	NA	Porphyromonadaceae bacterium	C3009	Crohn's Disease	0.034425
Crohn's Disease	MTG	oxc	A4PE17	Firmicutes	Bacilli	Lactobacillales	Lactobacillaceae	Lactobacillus	Lactobacillus acidophilus	C3009	Crohn's Disease	0.242795
Crohn's Disease	MTG	oxc	B8DWU2	Actinobacteria	Actinobacteria	Bifidobacteriales	Bifidobacteriaceae	Bifidobacterium	Bifidobacterium animalis subsp. lactis AD011	C3009	Crohn's Disease	0.20714
Crohn's Disease	MTG	oxc	D3R6V8	Actinobacteria	Actinobacteria	Bifidobacteriales	Bifidobacteriaceae	Bifidobacterium	Bifidobacterium animalis subsp. lactis BB-12	C3009	Crohn's Disease	0.0199363
Crohn's Disease	MTG	oxc	I2WUK6	Proteobacteria	Gammaproteobacteria	Enterobacterales	Enterobacteriaceae	Escherichia	Escherichia coli 4.0967	C3009	Crohn's Disease	0.0226865
Crohn's Disease	MTG	oxc	P0AFI0	Proteobacteria	Gammaproteobacteria	Enterobacterales	Enterobacteriaceae	Escherichia	Escherichia coli K-12	C3009	Crohn's Disease	10.29
Crohn's Disease	MTG	oxc	S1IEQ5	Proteobacteria	Gammaproteobacteria	Enterobacterales	Enterobacteriaceae	Escherichia	Escherichia coli KTE107	C3009	Crohn's Disease	0.0354627
Crohn's Disease	MTG	oxc	V6FX87	Proteobacteria	Gammaproteobacteria	Enterobacterales	Enterobacteriaceae	Escherichia	Escherichia coli 99.0741	C3009	Crohn's Disease	0.0201097
Crohn's Disease	MTS	oxc	A0A0R1HA15	Firmicutes	Bacilli	Lactobacillales	Lactobacillaceae	Lactobacillus	Lactobacillus amylovorus DSM 20531	C3009	Crohn's Disease	0.0467149
Crohn's Disease	MTS	oxc	A0A0R1UID8	Firmicutes	Bacilli	Lactobacillales	Lactobacillaceae	Lactobacillus	Lactobacillus kalixensis DSM 16043	C3009	Crohn's Disease	0.0655013
Crohn's Disease	MTS	oxc	A0A1Q6EIX1	Bacteroidetes	Bacteroidia	Bacteroidales	NA	NA	Bacteroidales bacterium 52_46	C3009	Crohn's Disease	0.419751
Crohn's Disease	MTS	oxc	A4PE17	Firmicutes	Bacilli	Lactobacillales	Lactobacillaceae	Lactobacillus	Lactobacillus acidophilus	C3009	Crohn's Disease	0.0378053
Crohn's Disease	MTS	oxc	P0AFI0	Proteobacteria	Gammaproteobacteria	Enterobacterales	Enterobacteriaceae	Escherichia	Escherichia coli K-12	C3009	Crohn's Disease	0.19033
Crohn's Disease	MTG	oxc	A0A062XEM5	Firmicutes	Bacilli	Lactobacillales	Lactobacillaceae	Lactobacillus	Lactobacillus animalis	C3009	Crohn's Disease-L3	0.0206614
Crohn's Disease	MTG	oxc	A0A070SLK1	Proteobacteria	Gammaproteobacteria	Enterobacterales	Enterobacteriaceae	Escherichia	Escherichia coli 2-210-07_S3_C3	C3009	Crohn's Disease-L3	0.0219315
Crohn's Disease	MTG	oxc	A0A072MUW5	Actinobacteria	Actinobacteria	Bifidobacteriales	Bifidobacteriaceae	Bifidobacterium	Bifidobacterium pseudocatenulatum IPLA36007	C3009	Crohn's Disease-L3	0.02799
Crohn's Disease	MTG	oxc	A0A073HBG2	Proteobacteria	Gammaproteobacteria	Enterobacterales	Enterobacteriaceae	Escherichia	Escherichia coli 5-366-08_S1_C3	C3009	Crohn's Disease-L3	0.333243
Crohn's Disease	MTG	oxc	A0A073UGW0	Proteobacteria	Gammaproteobacteria	Enterobacterales	Enterobacteriaceae	Escherichia	Escherichia coli 5-366-08_S1_C1	C3009	Crohn's Disease-L3	0.0219315
Crohn's Disease	MTG	oxc	A0A080IU12	Proteobacteria	Gammaproteobacteria	Enterobacterales	Enterobacteriaceae	Escherichia	Escherichia coli 1-250-04_S3_C2	C3009	Crohn's Disease-L3	0.61951
Crohn's Disease	MTG	oxc	A0A087ADU3	Actinobacteria	Actinobacteria	Bifidobacteriales	Bifidobacteriaceae	Bifidobacterium	Bifidobacterium choerinum	C3009	Crohn's Disease-L3	0.048871
Crohn's Disease	MTG	oxc	A0A087B560	Actinobacteria	Actinobacteria	Bifidobacteriales	Bifidobacteriaceae	Bifidobacterium	Bifidobacterium cuniculi	C3009	Crohn's Disease-L3	0.0304424
Crohn's Disease	MTG	oxc	A0A0A0FCC2	Proteobacteria	Gammaproteobacteria	Enterobacterales	Enterobacteriaceae	Escherichia	Escherichia coli G3/10	C3009	Crohn's Disease-L3	0.018288
Crohn's Disease	MTG	oxc	A0A0A7IC61	Actinobacteria	Actinobacteria	Bifidobacteriales	Bifidobacteriaceae	Bifidobacterium	Bifidobacterium pseudolongum PV8-2	C3009	Crohn's Disease-L3	0.0355805
Crohn's Disease	MTG	oxc	A0A0D8WDG1	Proteobacteria	Gammaproteobacteria	Enterobacterales	Enterobacteriaceae	Escherichia	Escherichia coli	C3009	Crohn's Disease-L3	0.657336
Crohn's Disease	MTG	oxc	A0A0L7BLA2	Actinobacteria	Actinobacteria	Bifidobacteriales	Bifidobacteriaceae	Bifidobacterium	Bifidobacterium animalis subsp. animalis MCC 0483	C3009	Crohn's Disease-L3	0.193649
Crohn's Disease	MTG	oxc	A0A0L7CWW3	Actinobacteria	Actinobacteria	Bifidobacteriales	Bifidobacteriaceae	Bifidobacterium	Bifidobacterium animalis subsp. animalis MCC 1489	C3009	Crohn's Disease-L3	0.0797864
Crohn's Disease	MTG	oxc	A0A0Q3BCQ9	Proteobacteria	Gammaproteobacteria	Enterobacterales	Enterobacteriaceae	Escherichia	Escherichia coli	C3009	Crohn's Disease-L3	0.0219315
Crohn's Disease	MTG	oxc	A0A0R1HA15	Firmicutes	Bacilli	Lactobacillales	Lactobacillaceae	Lactobacillus	Lactobacillus amylovorus DSM 20531	C3009	Crohn's Disease-L3	0.103379
Crohn's Disease	MTG	oxc	A0A0R1UID8	Firmicutes	Bacilli	Lactobacillales	Lactobacillaceae	Lactobacillus	Lactobacillus kalixensis DSM 16043	C3009	Crohn's Disease-L3	0.0310387
Crohn's Disease	MTG	oxc	A0A0R2KYZ0	Firmicutes	Bacilli	Lactobacillales	Lactobacillaceae	Lactobacillus	Lactobacillus amylovorus DSM 16698	C3009	Crohn's Disease-L3	0.0802204
Crohn's Disease	MTG	oxc	A0A0U0XH73	Chlamydiae	Chlamydiia	Chlamydiales	Chlamydiaceae	Chlamydia	Chlamydia trachomatis	C3009	Crohn's Disease-L3	0.0387073
Crohn's Disease	MTG	oxc	A0A1E3N4A4	Proteobacteria	Gammaproteobacteria	Enterobacterales	Enterobacteriaceae	Shigella	Shigella sp. FC569	C3009	Crohn's Disease-L3	0.0219315
Crohn's Disease	MTG	oxc	A0A1Q6EIX1	Bacteroidetes	Bacteroidia	Bacteroidales	NA	NA	Bacteroidales bacterium 52_46	C3009	Crohn's Disease-L3	0.0356523
Crohn's Disease	MTG	oxc	A0A1V8Q5U8	Actinobacteria	Actinobacteria	Bifidobacteriales	Bifidobacteriaceae	Bifidobacterium	Bifidobacterium dentium	C3009	Crohn's Disease-L3	0.0620216
Crohn's Disease	MTG	oxc	A0A1W9ZTI0	Actinobacteria	Actinobacteria	Corynebacteriales	Mycobacteriaceae	Mycobacterium	Mycobacterium angelicum	C3009	Crohn's Disease-L3	0.021777
Crohn's Disease	MTG	oxc	A0A209A2Q4	Proteobacteria	Gammaproteobacteria	Enterobacterales	Yersiniaceae	Yersinia	Yersinia frederiksenii	C3009	Crohn's Disease-L3	0.0468828
Crohn's Disease	MTG	oxc	A0A243V1A0	Proteobacteria	Gammaproteobacteria	Enterobacterales	Enterobacteriaceae	Escherichia	Escherichia coli	C3009	Crohn's Disease-L3	0.268826
Crohn's Disease	MTG	oxc	A0A2A2C4U6	Proteobacteria	Gammaproteobacteria	Enterobacterales	Enterobacteriaceae	Escherichia	Escherichia coli	C3009	Crohn's Disease-L3	0.0211743
Crohn's Disease	MTG	oxc	A0A2I6E5U9	Proteobacteria	Gammaproteobacteria	Enterobacterales	Enterobacteriaceae	Enterobacter	Enterobacter cancerogenus	C3009	Crohn's Disease-L3	0.0438629
Crohn's Disease	MTG	oxc	A0A2K0PZR4	Proteobacteria	Gammaproteobacteria	Enterobacterales	Enterobacteriaceae	Shigella	Shigella flexneri	C3009	Crohn's Disease-L3	0.0528278
Crohn's Disease	MTG	oxc	A0A2V1J2C8	Bacteroidetes	Bacteroidia	Bacteroidales	Muribaculaceae	NA	Muribaculaceae bacterium DSM 100764	C3009	Crohn's Disease-L3	0.0359729
Crohn's Disease	MTG	oxc	A0A2X1KIW1	Proteobacteria	Gammaproteobacteria	Enterobacterales	Enterobacteriaceae	Escherichia	Escherichia coli	C3009	Crohn's Disease-L3	0.020067
Crohn's Disease	MTG	oxc	A0A354HZQ6	Bacteroidetes	Bacteroidia	Bacteroidales	Porphyromonadaceae	NA	Porphyromonadaceae bacterium	C3009	Crohn's Disease-L3	0.035844
Crohn's Disease	MTG	oxc	A0A355Z630	Bacteroidetes	Bacteroidia	Bacteroidales	Porphyromonadaceae	NA	Porphyromonadaceae bacterium	C3009	Crohn's Disease-L3	0.034425
Crohn's Disease	MTG	oxc	A4PE17	Firmicutes	Bacilli	Lactobacillales	Lactobacillaceae	Lactobacillus	Lactobacillus acidophilus	C3009	Crohn's Disease-L3	0.242795
Crohn's Disease	MTG	oxc	B8DWU2	Actinobacteria	Actinobacteria	Bifidobacteriales	Bifidobacteriaceae	Bifidobacterium	Bifidobacterium animalis subsp. lactis AD011	C3009	Crohn's Disease-L3	0.20714
Crohn's Disease	MTG	oxc	D3R6V8	Actinobacteria	Actinobacteria	Bifidobacteriales	Bifidobacteriaceae	Bifidobacterium	Bifidobacterium animalis subsp. lactis BB-12	C3009	Crohn's Disease-L3	0.0199363
Crohn's Disease	MTG	oxc	I2WUK6	Proteobacteria	Gammaproteobacteria	Enterobacterales	Enterobacteriaceae	Escherichia	Escherichia coli 4.0967	C3009	Crohn's Disease-L3	0.0226865
Crohn's Disease	MTG	oxc	P0AFI0	Proteobacteria	Gammaproteobacteria	Enterobacterales	Enterobacteriaceae	Escherichia	Escherichia coli K-12	C3009	Crohn's Disease-L3	10.29
Crohn's Disease	MTG	oxc	S1IEQ5	Proteobacteria	Gammaproteobacteria	Enterobacterales	Enterobacteriaceae	Escherichia	Escherichia coli KTE107	C3009	Crohn's Disease-L3	0.0354627
Crohn's Disease	MTG	oxc	V6FX87	Proteobacteria	Gammaproteobacteria	Enterobacterales	Enterobacteriaceae	Escherichia	Escherichia coli 99.0741	C3009	Crohn's Disease-L3	0.0201097
Crohn's Disease	MTS	oxc	A0A0R1HA15	Firmicutes	Bacilli	Lactobacillales	Lactobacillaceae	Lactobacillus	Lactobacillus amylovorus DSM 20531	C3009	Crohn's Disease-L3	0.0467149
Crohn's Disease	MTS	oxc	A0A0R1UID8	Firmicutes	Bacilli	Lactobacillales	Lactobacillaceae	Lactobacillus	Lactobacillus kalixensis DSM 16043	C3009	Crohn's Disease-L3	0.0655013
Crohn's Disease	MTS	oxc	A0A1Q6EIX1	Bacteroidetes	Bacteroidia	Bacteroidales	NA	NA	Bacteroidales bacterium 52_46	C3009	Crohn's Disease-L3	0.419751
Crohn's Disease	MTS	oxc	A4PE17	Firmicutes	Bacilli	Lactobacillales	Lactobacillaceae	Lactobacillus	Lactobacillus acidophilus	C3009	Crohn's Disease-L3	0.0378053
Crohn's Disease	MTS	oxc	P0AFI0	Proteobacteria	Gammaproteobacteria	Enterobacterales	Enterobacteriaceae	Escherichia	Escherichia coli K-12	C3009	Crohn's Disease-L3	0.19033
Crohn's Disease	MTG	oxc	A0A029HTY6	Proteobacteria	Gammaproteobacteria	Enterobacterales	Enterobacteriaceae	Escherichia	Escherichia coli 2-005-03_S4_C3	C3010	Crohn's Disease	0.0249531
Crohn's Disease	MTG	oxc	A0A073UGW0	Proteobacteria	Gammaproteobacteria	Enterobacterales	Enterobacteriaceae	Escherichia	Escherichia coli 5-366-08_S1_C1	C3010	Crohn's Disease	0.0880402
Crohn's Disease	MTG	oxc	A0A087ADU3	Actinobacteria	Actinobacteria	Bifidobacteriales	Bifidobacteriaceae	Bifidobacterium	Bifidobacterium choerinum	C3010	Crohn's Disease	0.0331636
Crohn's Disease	MTG	oxc	A0A0D8VXR4	Proteobacteria	Gammaproteobacteria	Enterobacterales	Enterobacteriaceae	Escherichia	Escherichia coli	C3010	Crohn's Disease	0.0245106
Crohn's Disease	MTG	oxc	A0A0L7CWW3	Actinobacteria	Actinobacteria	Bifidobacteriales	Bifidobacteriaceae	Bifidobacterium	Bifidobacterium animalis subsp. animalis MCC 1489	C3010	Crohn's Disease	0.0339444
Crohn's Disease	MTG	oxc	A0A0R1HA15	Firmicutes	Bacilli	Lactobacillales	Lactobacillaceae	Lactobacillus	Lactobacillus amylovorus DSM 20531	C3010	Crohn's Disease	0.0780406
Crohn's Disease	MTG	oxc	A0A1Q6EIX1	Bacteroidetes	Bacteroidia	Bacteroidales	NA	NA	Bacteroidales bacterium 52_46	C3010	Crohn's Disease	0.738061
Crohn's Disease	MTG	oxc	A0A243V1A0	Proteobacteria	Gammaproteobacteria	Enterobacterales	Enterobacteriaceae	Escherichia	Escherichia coli	C3010	Crohn's Disease	0.0239169
Crohn's Disease	MTG	oxc	A0A2A4PIS9	Proteobacteria	Alphaproteobacteria	Rhodospirillales	Rhodospirillaceae	NA	Rhodospirillaceae bacterium	C3010	Crohn's Disease	0.0336646
Crohn's Disease	MTG	oxc	A0A2V1IRU2	Bacteroidetes	Bacteroidia	Bacteroidales	Muribaculaceae	NA	Muribaculaceae bacterium DSM 103720	C3010	Crohn's Disease	0.711299
Crohn's Disease	MTG	oxc	A0A2V1J2C8	Bacteroidetes	Bacteroidia	Bacteroidales	Muribaculaceae	NA	Muribaculaceae bacterium DSM 100764	C3010	Crohn's Disease	0.412158
Crohn's Disease	MTG	oxc	A0A354HZQ6	Bacteroidetes	Bacteroidia	Bacteroidales	Porphyromonadaceae	NA	Porphyromonadaceae bacterium	C3010	Crohn's Disease	0.764239
Crohn's Disease	MTG	oxc	A0A355Z630	Bacteroidetes	Bacteroidia	Bacteroidales	Porphyromonadaceae	NA	Porphyromonadaceae bacterium	C3010	Crohn's Disease	0.596545
Crohn's Disease	MTG	oxc	A4PE17	Firmicutes	Bacilli	Lactobacillales	Lactobacillaceae	Lactobacillus	Lactobacillus acidophilus	C3010	Crohn's Disease	0.0631565
Crohn's Disease	MTG	oxc	C3X545	Proteobacteria	Betaproteobacteria	Burkholderiales	Oxalobacteraceae	Oxalobacter	Oxalobacter formigenes HOxBLS	C3010	Crohn's Disease	0.0330919
Crohn's Disease	MTG	oxc	P0AFI0	Proteobacteria	Gammaproteobacteria	Enterobacterales	Enterobacteriaceae	Escherichia	Escherichia coli K-12	C3010	Crohn's Disease	0.237541
Crohn's Disease	MTG	oxc	P40149	Proteobacteria	Betaproteobacteria	Burkholderiales	Oxalobacteraceae	Oxalobacter	Oxalobacter formigenes	C3010	Crohn's Disease	0.123823
Crohn's Disease	MTG	oxc	R5AVJ0	Bacteroidetes	Bacteroidia	Bacteroidales	Prevotellaceae	Prevotella	Prevotella sp. CAG:1031	C3010	Crohn's Disease	0.1452
Crohn's Disease	MTS	oxc	A0A1Q6EIX1	Bacteroidetes	Bacteroidia	Bacteroidales	NA	NA	Bacteroidales bacterium 52_46	C3010	Crohn's Disease	1.57501
Crohn's Disease	MTS	oxc	A0A2A4PIS9	Proteobacteria	Alphaproteobacteria	Rhodospirillales	Rhodospirillaceae	NA	Rhodospirillaceae bacterium	C3010	Crohn's Disease	0.117912
Crohn's Disease	MTS	oxc	A0A2V1IRU2	Bacteroidetes	Bacteroidia	Bacteroidales	Muribaculaceae	NA	Muribaculaceae bacterium DSM 103720	C3010	Crohn's Disease	0.623788
Crohn's Disease	MTS	oxc	A0A2V1J2C8	Bacteroidetes	Bacteroidia	Bacteroidales	Muribaculaceae	NA	Muribaculaceae bacterium DSM 100764	C3010	Crohn's Disease	1.52075
Crohn's Disease	MTS	oxc	A0A354HZQ6	Bacteroidetes	Bacteroidia	Bacteroidales	Porphyromonadaceae	NA	Porphyromonadaceae bacterium	C3010	Crohn's Disease	0.978594
Crohn's Disease	MTS	oxc	A0A355Z630	Bacteroidetes	Bacteroidia	Bacteroidales	Porphyromonadaceae	NA	Porphyromonadaceae bacterium	C3010	Crohn's Disease	0.472344
Crohn's Disease	MTS	oxc	C3X545	Proteobacteria	Betaproteobacteria	Burkholderiales	Oxalobacteraceae	Oxalobacter	Oxalobacter formigenes HOxBLS	C3010	Crohn's Disease	0.0583127
Crohn's Disease	MTS	oxc	P40149	Proteobacteria	Betaproteobacteria	Burkholderiales	Oxalobacteraceae	Oxalobacter	Oxalobacter formigenes	C3010	Crohn's Disease	1.16454
Crohn's Disease	MTS	oxc	R5AVJ0	Bacteroidetes	Bacteroidia	Bacteroidales	Prevotellaceae	Prevotella	Prevotella sp. CAG:1031	C3010	Crohn's Disease	0.129974
Crohn's Disease	MTG	oxc	A0A029HTY6	Proteobacteria	Gammaproteobacteria	Enterobacterales	Enterobacteriaceae	Escherichia	Escherichia coli 2-005-03_S4_C3	C3010	Crohn's Disease-L3	0.0249531
Crohn's Disease	MTG	oxc	A0A073UGW0	Proteobacteria	Gammaproteobacteria	Enterobacterales	Enterobacteriaceae	Escherichia	Escherichia coli 5-366-08_S1_C1	C3010	Crohn's Disease-L3	0.0880402
Crohn's Disease	MTG	oxc	A0A087ADU3	Actinobacteria	Actinobacteria	Bifidobacteriales	Bifidobacteriaceae	Bifidobacterium	Bifidobacterium choerinum	C3010	Crohn's Disease-L3	0.0331636
Crohn's Disease	MTG	oxc	A0A0D8VXR4	Proteobacteria	Gammaproteobacteria	Enterobacterales	Enterobacteriaceae	Escherichia	Escherichia coli	C3010	Crohn's Disease-L3	0.0245106
Crohn's Disease	MTG	oxc	A0A0L7CWW3	Actinobacteria	Actinobacteria	Bifidobacteriales	Bifidobacteriaceae	Bifidobacterium	Bifidobacterium animalis subsp. animalis MCC 1489	C3010	Crohn's Disease-L3	0.0339444
Crohn's Disease	MTG	oxc	A0A0R1HA15	Firmicutes	Bacilli	Lactobacillales	Lactobacillaceae	Lactobacillus	Lactobacillus amylovorus DSM 20531	C3010	Crohn's Disease-L3	0.0780406
Crohn's Disease	MTG	oxc	A0A1Q6EIX1	Bacteroidetes	Bacteroidia	Bacteroidales	NA	NA	Bacteroidales bacterium 52_46	C3010	Crohn's Disease-L3	0.738061
Crohn's Disease	MTG	oxc	A0A243V1A0	Proteobacteria	Gammaproteobacteria	Enterobacterales	Enterobacteriaceae	Escherichia	Escherichia coli	C3010	Crohn's Disease-L3	0.0239169
Crohn's Disease	MTG	oxc	A0A2A4PIS9	Proteobacteria	Alphaproteobacteria	Rhodospirillales	Rhodospirillaceae	NA	Rhodospirillaceae bacterium	C3010	Crohn's Disease-L3	0.0336646
Crohn's Disease	MTG	oxc	A0A2V1IRU2	Bacteroidetes	Bacteroidia	Bacteroidales	Muribaculaceae	NA	Muribaculaceae bacterium DSM 103720	C3010	Crohn's Disease-L3	0.711299
Crohn's Disease	MTG	oxc	A0A2V1J2C8	Bacteroidetes	Bacteroidia	Bacteroidales	Muribaculaceae	NA	Muribaculaceae bacterium DSM 100764	C3010	Crohn's Disease-L3	0.412158
Crohn's Disease	MTG	oxc	A0A354HZQ6	Bacteroidetes	Bacteroidia	Bacteroidales	Porphyromonadaceae	NA	Porphyromonadaceae bacterium	C3010	Crohn's Disease-L3	0.764239
Crohn's Disease	MTG	oxc	A0A355Z630	Bacteroidetes	Bacteroidia	Bacteroidales	Porphyromonadaceae	NA	Porphyromonadaceae bacterium	C3010	Crohn's Disease-L3	0.596545
Crohn's Disease	MTG	oxc	A4PE17	Firmicutes	Bacilli	Lactobacillales	Lactobacillaceae	Lactobacillus	Lactobacillus acidophilus	C3010	Crohn's Disease-L3	0.0631565
Crohn's Disease	MTG	oxc	C3X545	Proteobacteria	Betaproteobacteria	Burkholderiales	Oxalobacteraceae	Oxalobacter	Oxalobacter formigenes HOxBLS	C3010	Crohn's Disease-L3	0.0330919
Crohn's Disease	MTG	oxc	P0AFI0	Proteobacteria	Gammaproteobacteria	Enterobacterales	Enterobacteriaceae	Escherichia	Escherichia coli K-12	C3010	Crohn's Disease-L3	0.237541
Crohn's Disease	MTG	oxc	P40149	Proteobacteria	Betaproteobacteria	Burkholderiales	Oxalobacteraceae	Oxalobacter	Oxalobacter formigenes	C3010	Crohn's Disease-L3	0.123823
Crohn's Disease	MTG	oxc	R5AVJ0	Bacteroidetes	Bacteroidia	Bacteroidales	Prevotellaceae	Prevotella	Prevotella sp. CAG:1031	C3010	Crohn's Disease-L3	0.1452
Crohn's Disease	MTS	oxc	A0A1Q6EIX1	Bacteroidetes	Bacteroidia	Bacteroidales	NA	NA	Bacteroidales bacterium 52_46	C3010	Crohn's Disease-L3	1.57501
Crohn's Disease	MTS	oxc	A0A2A4PIS9	Proteobacteria	Alphaproteobacteria	Rhodospirillales	Rhodospirillaceae	NA	Rhodospirillaceae bacterium	C3010	Crohn's Disease-L3	0.117912
Crohn's Disease	MTS	oxc	A0A2V1IRU2	Bacteroidetes	Bacteroidia	Bacteroidales	Muribaculaceae	NA	Muribaculaceae bacterium DSM 103720	C3010	Crohn's Disease-L3	0.623788
Crohn's Disease	MTS	oxc	A0A2V1J2C8	Bacteroidetes	Bacteroidia	Bacteroidales	Muribaculaceae	NA	Muribaculaceae bacterium DSM 100764	C3010	Crohn's Disease-L3	1.52075
Crohn's Disease	MTS	oxc	A0A354HZQ6	Bacteroidetes	Bacteroidia	Bacteroidales	Porphyromonadaceae	NA	Porphyromonadaceae bacterium	C3010	Crohn's Disease-L3	0.978594
Crohn's Disease	MTS	oxc	A0A355Z630	Bacteroidetes	Bacteroidia	Bacteroidales	Porphyromonadaceae	NA	Porphyromonadaceae bacterium	C3010	Crohn's Disease-L3	0.472344
Crohn's Disease	MTS	oxc	C3X545	Proteobacteria	Betaproteobacteria	Burkholderiales	Oxalobacteraceae	Oxalobacter	Oxalobacter formigenes HOxBLS	C3010	Crohn's Disease-L3	0.0583127
Crohn's Disease	MTS	oxc	P40149	Proteobacteria	Betaproteobacteria	Burkholderiales	Oxalobacteraceae	Oxalobacter	Oxalobacter formigenes	C3010	Crohn's Disease-L3	1.16454
Crohn's Disease	MTS	oxc	R5AVJ0	Bacteroidetes	Bacteroidia	Bacteroidales	Prevotellaceae	Prevotella	Prevotella sp. CAG:1031	C3010	Crohn's Disease-L3	0.129974
Crohn's Disease	MTG	oxc	A0A087B560	Actinobacteria	Actinobacteria	Bifidobacteriales	Bifidobacteriaceae	Bifidobacterium	Bifidobacterium cuniculi	C3012	Crohn's Disease	0.0354213
Crohn's Disease	MTG	oxc	A0A0L7BLA2	Actinobacteria	Actinobacteria	Bifidobacteriales	Bifidobacteriaceae	Bifidobacterium	Bifidobacterium animalis subsp. animalis MCC 0483	C3012	Crohn's Disease	0.0465011
Crohn's Disease	MTG	oxc	A0A0L7CWW3	Actinobacteria	Actinobacteria	Bifidobacteriales	Bifidobacteriaceae	Bifidobacterium	Bifidobacterium animalis subsp. animalis MCC 1489	C3012	Crohn's Disease	0.0581713
Crohn's Disease	MTG	oxc	A0A243V1A0	Proteobacteria	Gammaproteobacteria	Enterobacterales	Enterobacteriaceae	Escherichia	Escherichia coli	C3012	Crohn's Disease	0.129165
Crohn's Disease	MTG	oxc	A4PE17	Firmicutes	Bacilli	Lactobacillales	Lactobacillaceae	Lactobacillus	Lactobacillus acidophilus	C3012	Crohn's Disease	0.0359082
Crohn's Disease	MTG	oxc	P0AFI0	Proteobacteria	Gammaproteobacteria	Enterobacterales	Enterobacteriaceae	Escherichia	Escherichia coli K-12	C3012	Crohn's Disease	0.595671
Crohn's Disease	MTS	oxc	C3X545	Proteobacteria	Betaproteobacteria	Burkholderiales	Oxalobacteraceae	Oxalobacter	Oxalobacter formigenes HOxBLS	C3012	Crohn's Disease	0.0358462
Crohn's Disease	MTG	oxc	A0A087B560	Actinobacteria	Actinobacteria	Bifidobacteriales	Bifidobacteriaceae	Bifidobacterium	Bifidobacterium cuniculi	C3012	Crohn's Disease-nonL3	0.0354213
Crohn's Disease	MTG	oxc	A0A0L7BLA2	Actinobacteria	Actinobacteria	Bifidobacteriales	Bifidobacteriaceae	Bifidobacterium	Bifidobacterium animalis subsp. animalis MCC 0483	C3012	Crohn's Disease-nonL3	0.0465011
Crohn's Disease	MTG	oxc	A0A0L7CWW3	Actinobacteria	Actinobacteria	Bifidobacteriales	Bifidobacteriaceae	Bifidobacterium	Bifidobacterium animalis subsp. animalis MCC 1489	C3012	Crohn's Disease-nonL3	0.0581713
Crohn's Disease	MTG	oxc	A0A243V1A0	Proteobacteria	Gammaproteobacteria	Enterobacterales	Enterobacteriaceae	Escherichia	Escherichia coli	C3012	Crohn's Disease-nonL3	0.129165
Crohn's Disease	MTG	oxc	A4PE17	Firmicutes	Bacilli	Lactobacillales	Lactobacillaceae	Lactobacillus	Lactobacillus acidophilus	C3012	Crohn's Disease-nonL3	0.0359082
Crohn's Disease	MTG	oxc	P0AFI0	Proteobacteria	Gammaproteobacteria	Enterobacterales	Enterobacteriaceae	Escherichia	Escherichia coli K-12	C3012	Crohn's Disease-nonL3	0.595671
Crohn's Disease	MTS	oxc	C3X545	Proteobacteria	Betaproteobacteria	Burkholderiales	Oxalobacteraceae	Oxalobacter	Oxalobacter formigenes HOxBLS	C3012	Crohn's Disease-nonL3	0.0358462
Crohn's Disease	MTG	oxc	A0A028AST1	Proteobacteria	Gammaproteobacteria	Enterobacterales	Enterobacteriaceae	Escherichia	Escherichia coli O69:H11 str. 08-4661	C3016	Crohn's Disease	0.104079
Crohn's Disease	MTG	oxc	A0A073HBG2	Proteobacteria	Gammaproteobacteria	Enterobacterales	Enterobacteriaceae	Escherichia	Escherichia coli 5-366-08_S1_C3	C3016	Crohn's Disease	0.112846
Crohn's Disease	MTG	oxc	A0A073UGW0	Proteobacteria	Gammaproteobacteria	Enterobacterales	Enterobacteriaceae	Escherichia	Escherichia coli 5-366-08_S1_C1	C3016	Crohn's Disease	0.0738969
Crohn's Disease	MTG	oxc	A0A0A7IC61	Actinobacteria	Actinobacteria	Bifidobacteriales	Bifidobacteriaceae	Bifidobacterium	Bifidobacterium pseudolongum PV8-2	C3016	Crohn's Disease	0.0271627
Crohn's Disease	MTG	oxc	A0A0D8WDG1	Proteobacteria	Gammaproteobacteria	Enterobacterales	Enterobacteriaceae	Escherichia	Escherichia coli	C3016	Crohn's Disease	0.0369485
Crohn's Disease	MTG	oxc	A0A1V8Q5U8	Actinobacteria	Actinobacteria	Bifidobacteriales	Bifidobacteriaceae	Bifidobacterium	Bifidobacterium dentium	C3016	Crohn's Disease	0.0272088
Crohn's Disease	MTG	oxc	A0A243V1A0	Proteobacteria	Gammaproteobacteria	Enterobacterales	Enterobacteriaceae	Escherichia	Escherichia coli	C3016	Crohn's Disease	0.0547924
Crohn's Disease	MTG	oxc	C3X545	Proteobacteria	Betaproteobacteria	Burkholderiales	Oxalobacteraceae	Oxalobacter	Oxalobacter formigenes HOxBLS	C3016	Crohn's Disease	0.0384165
Crohn's Disease	MTG	oxc	P0AFI0	Proteobacteria	Gammaproteobacteria	Enterobacterales	Enterobacteriaceae	Escherichia	Escherichia coli K-12	C3016	Crohn's Disease	0.35539
Crohn's Disease	MTG	oxc	P40149	Proteobacteria	Betaproteobacteria	Burkholderiales	Oxalobacteraceae	Oxalobacter	Oxalobacter formigenes	C3016	Crohn's Disease	0.210185
Crohn's Disease	MTS	oxc	A0A2A4PIS9	Proteobacteria	Alphaproteobacteria	Rhodospirillales	Rhodospirillaceae	NA	Rhodospirillaceae bacterium	C3016	Crohn's Disease	0.143022
Crohn's Disease	MTS	oxc	C3X545	Proteobacteria	Betaproteobacteria	Burkholderiales	Oxalobacteraceae	Oxalobacter	Oxalobacter formigenes HOxBLS	C3016	Crohn's Disease	0.338015
Crohn's Disease	MTS	oxc	P40149	Proteobacteria	Betaproteobacteria	Burkholderiales	Oxalobacteraceae	Oxalobacter	Oxalobacter formigenes	C3016	Crohn's Disease	0.941671
Crohn's Disease	MTG	oxc	A0A028AST1	Proteobacteria	Gammaproteobacteria	Enterobacterales	Enterobacteriaceae	Escherichia	Escherichia coli O69:H11 str. 08-4661	C3016	Crohn's Disease-nonL3	0.104079
Crohn's Disease	MTG	oxc	A0A073HBG2	Proteobacteria	Gammaproteobacteria	Enterobacterales	Enterobacteriaceae	Escherichia	Escherichia coli 5-366-08_S1_C3	C3016	Crohn's Disease-nonL3	0.112846
Crohn's Disease	MTG	oxc	A0A073UGW0	Proteobacteria	Gammaproteobacteria	Enterobacterales	Enterobacteriaceae	Escherichia	Escherichia coli 5-366-08_S1_C1	C3016	Crohn's Disease-nonL3	0.0738969
Crohn's Disease	MTG	oxc	A0A0A7IC61	Actinobacteria	Actinobacteria	Bifidobacteriales	Bifidobacteriaceae	Bifidobacterium	Bifidobacterium pseudolongum PV8-2	C3016	Crohn's Disease-nonL3	0.0271627
Crohn's Disease	MTG	oxc	A0A0D8WDG1	Proteobacteria	Gammaproteobacteria	Enterobacterales	Enterobacteriaceae	Escherichia	Escherichia coli	C3016	Crohn's Disease-nonL3	0.0369485
Crohn's Disease	MTG	oxc	A0A1V8Q5U8	Actinobacteria	Actinobacteria	Bifidobacteriales	Bifidobacteriaceae	Bifidobacterium	Bifidobacterium dentium	C3016	Crohn's Disease-nonL3	0.0272088
Crohn's Disease	MTG	oxc	A0A243V1A0	Proteobacteria	Gammaproteobacteria	Enterobacterales	Enterobacteriaceae	Escherichia	Escherichia coli	C3016	Crohn's Disease-nonL3	0.0547924
Crohn's Disease	MTG	oxc	C3X545	Proteobacteria	Betaproteobacteria	Burkholderiales	Oxalobacteraceae	Oxalobacter	Oxalobacter formigenes HOxBLS	C3016	Crohn's Disease-nonL3	0.0384165
Crohn's Disease	MTG	oxc	P0AFI0	Proteobacteria	Gammaproteobacteria	Enterobacterales	Enterobacteriaceae	Escherichia	Escherichia coli K-12	C3016	Crohn's Disease-nonL3	0.35539
Crohn's Disease	MTG	oxc	P40149	Proteobacteria	Betaproteobacteria	Burkholderiales	Oxalobacteraceae	Oxalobacter	Oxalobacter formigenes	C3016	Crohn's Disease-nonL3	0.210185
Crohn's Disease	MTS	oxc	A0A2A4PIS9	Proteobacteria	Alphaproteobacteria	Rhodospirillales	Rhodospirillaceae	NA	Rhodospirillaceae bacterium	C3016	Crohn's Disease-nonL3	0.143022
Crohn's Disease	MTS	oxc	C3X545	Proteobacteria	Betaproteobacteria	Burkholderiales	Oxalobacteraceae	Oxalobacter	Oxalobacter formigenes HOxBLS	C3016	Crohn's Disease-nonL3	0.338015
Crohn's Disease	MTS	oxc	P40149	Proteobacteria	Betaproteobacteria	Burkholderiales	Oxalobacteraceae	Oxalobacter	Oxalobacter formigenes	C3016	Crohn's Disease-nonL3	0.941671
Crohn's Disease	MTG	oxc	A0A080IU12	Proteobacteria	Gammaproteobacteria	Enterobacterales	Enterobacteriaceae	Escherichia	Escherichia coli 1-250-04_S3_C2	C3017	Crohn's Disease	0.019317
Crohn's Disease	MTG	oxc	A0A0B6S427	Proteobacteria	Betaproteobacteria	Burkholderiales	Burkholderiaceae	Burkholderia	Burkholderia glumae PG1	C3017	Crohn's Disease	0.0418509
Crohn's Disease	MTG	oxc	A0A0H2QLB1	Proteobacteria	Gammaproteobacteria	Enterobacterales	Morganellaceae	Moellerella	Moellerella wisconsensis	C3017	Crohn's Disease	0.126664
Crohn's Disease	MTG	oxc	A0A174RZK3	Firmicutes	Clostridia	Clostridiales	Clostridiaceae	Clostridium	Clostridium baratii	C3017	Crohn's Disease	0.210362
Crohn's Disease	MTG	oxc	A0A1B7JUF0	Proteobacteria	Gammaproteobacteria	Enterobacterales	Morganellaceae	Providencia	Providencia heimbachae ATCC 35613	C3017	Crohn's Disease	0.0420724
Crohn's Disease	MTG	oxc	A0A1Q6EIX1	Bacteroidetes	Bacteroidia	Bacteroidales	NA	NA	Bacteroidales bacterium 52_46	C3017	Crohn's Disease	1.57333
[truncated: 1,696 more rows]
