# Supplementary material for: Microbial genetic and transcriptional contributions to oxalate degradation by the gut microbiota in health and disease
Source: eLife. 2021 Mar 26;10:e63642. doi: 10.7554/eLife.63642 (PMC8062136; doi:10.7554/eLife.63642)
Supplement: Figure 6—source data 1. [file elife-63642-fig6-data1.xlsx]

## Sheet: Sheet1
mouse	group	test	value
GM25	Control Media	Fecal oxalate (um/mg of feces)	0.561894
GM26	Control Media	Fecal oxalate (um/mg of feces)	0.573173
GM27	Control Media	Fecal oxalate (um/mg of feces)	0.488608
GM28	Control Media	Fecal oxalate (um/mg of feces)	0.507065
GM29	Control Media	Fecal oxalate (um/mg of feces)	0.495732
GM30	Control Media	Fecal oxalate (um/mg of feces)	0.584452
GM31	PH1	Fecal oxalate (um/mg of feces)	0.336829
GM32	PH1	Fecal oxalate (um/mg of feces)	0.36113
GM33	PH1	Fecal oxalate (um/mg of feces)	0.383965
GM34	PH1	Fecal oxalate (um/mg of feces)	0.359592
GM35	PH1	Fecal oxalate (um/mg of feces)	0.29561
GM36	PH1	Fecal oxalate (um/mg of feces)	0.371819
GM37	OXCC13	Fecal oxalate (um/mg of feces)	0.419712
GM38	OXCC13	Fecal oxalate (um/mg of feces)	0.326678
GM39	OXCC13	Fecal oxalate (um/mg of feces)	0.399888
GM40	OXCC13	Fecal oxalate (um/mg of feces)	0.402155
GM41	OXCC13	Fecal oxalate (um/mg of feces)	0.398917
GM25	Control Media	urine oxalate/Creatinine (mM/mM)	0.996079
GM26	Control Media	urine oxalate/Creatinine (mM/mM)	3.39432
GM27/GM28	Control Media	urine oxalate/Creatinine (mM/mM)	2.20759
GM29/GM30	Control Media	urine oxalate/Creatinine (mM/mM)	2.46014
GM31	PH1	urine oxalate/Creatinine (mM/mM)	0.888066
GM32	PH1	urine oxalate/Creatinine (mM/mM)	1.00353
GM33	PH1	urine oxalate/Creatinine (mM/mM)	0.528365
GM34	PH1	urine oxalate/Creatinine (mM/mM)	1.03094
GM35	PH1	urine oxalate/Creatinine (mM/mM)	0.351977
GM36	PH1	urine oxalate/Creatinine (mM/mM)	0.275557
GM37	OXCC13	urine oxalate/Creatinine (mM/mM)	0.221983
GM38	OXCC13	urine oxalate/Creatinine (mM/mM)	1.05495
GM39	OXCC13	urine oxalate/Creatinine (mM/mM)	1.05111
GM40/GM41	OXCC13	urine oxalate/Creatinine (mM/mM)	1.29944
