# Supplementary material for: Microbial genetic and transcriptional contributions to oxalate degradation by the gut microbiota in health and disease
Source: eLife journal article supplement (doi:10.7554/elife.63642), 2021-03-26
Supplement: supp [file elife_poa_e63642_Figure_2_figure_supplement_1.pdf › elife_poa_e63642_Figure_2_figure_supplement_1.pdf]

Per sample

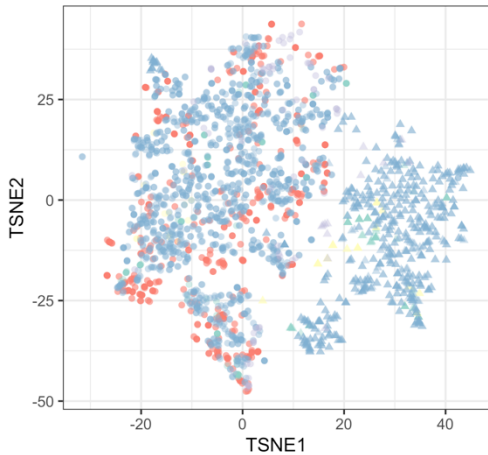

Per subject

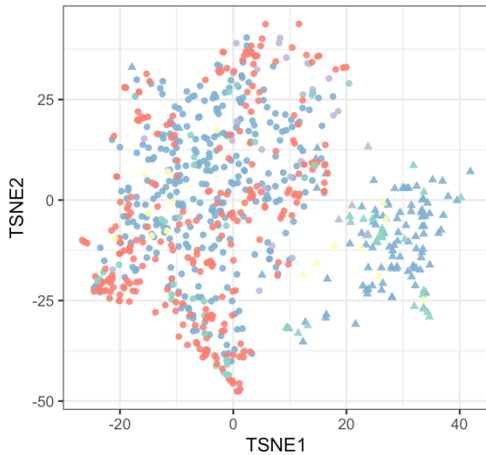

Study

- AMP
- Franzosa
- HMP2
- MetaHit
- US\_men

Assay

- Metagenomics
- Metatranscriptomics
