# Supplementary material for: Microbial genetic and transcriptional contributions to oxalate degradation by the gut microbiota in health and disease
Source: eLife. 2021 Mar 26;10:e63642. doi: 10.7554/eLife.63642 (PMC8062136; doi:10.7554/eLife.63642)
Supplement: Supplementary file 2. [file elife-63642-supp2.xlsx]

## Sheet: frc
centroid	centroid_taxa	member	member_taxa
A0A010Z285	Cryptosporangium arvum DSM 44712	A0A010Z285	Cryptosporangium arvum DSM 44712
A0A010Z285	Cryptosporangium arvum DSM 44712	A0A1M7RLZ7	Cryptosporangium aurantiacum
A0A016XIC7	Hylemonella gracilis str. Niagara R	A0A016XIC7	Hylemonella gracilis str. Niagara R
A0A016XIC7	Hylemonella gracilis str. Niagara R	A0A0R0MNW7	Curvibacter sp. PAE-UM
A0A016XIC7	Hylemonella gracilis str. Niagara R	A0A1F8W0Y8	Curvibacter sp. GWA2_64_110
A0A016XIC7	Hylemonella gracilis str. Niagara R	A0A2D0IB13	Curvibacter sp. PD_MW3
A0A016XIC7	Hylemonella gracilis str. Niagara R	A0A353Y201	Curvibacter sp.
A0A016XIC7	Hylemonella gracilis str. Niagara R	F3KVX6	Hylemonella gracilis ATCC 19624
A0A059IP99	Defluviimonas sp. 20V17	A0A059IP99	Defluviimonas sp. 20V17
A0A059IPZ9	Defluviimonas sp. 20V17	A0A059IPZ9	Defluviimonas sp. 20V17
A0A060DLJ1	Azospirillum brasilense	A0A060DLJ1	Azospirillum brasilense
A0A060DLJ1	Azospirillum brasilense	A0A060DNI4	Azospirillum brasilense
A0A060DLJ1	Azospirillum brasilense	A0A0D2UJB2	Skermanella aerolata KACC 11604
A0A060DLJ1	Azospirillum brasilense	A0A0F2KT75	Azospirillum thiophilum
A0A060DLJ1	Azospirillum brasilense	A0A0P0ETU9	Azospirillum brasilense
A0A060DLJ1	Azospirillum brasilense	A0A1X7EEC1	Azospirillum oryzae
A0A060DLJ1	Azospirillum brasilense	A0A1X7PA36	Azospirillum lipoferum
A0A060DLJ1	Azospirillum brasilense	A0A235H2J0	Azospirillum brasilense
A0A060DLJ1	Azospirillum brasilense	A0A2B8BCE9	Azospirillum sp. B2
A0A060DLJ1	Azospirillum brasilense	A0A2K1FQB2	Azospirillum brasilense
A0A060DLJ1	Azospirillum brasilense	A0A2S1XER0	Azospirillum sp. TSH58
A0A060DLJ1	Azospirillum brasilense	A0A2U1VWD1	Azospirillum sp. TSO35-2
A0A060DLJ1	Azospirillum brasilense	A0A2U1W6F3	Azospirillum sp. TSA6c
A0A060DLJ1	Azospirillum brasilense	A0A2U1XE64	Azospirillum sp. TSH100
A0A060DLJ1	Azospirillum brasilense	A0A2U1XSS3	Azospirillum sp. TSH64
A0A060DLJ1	Azospirillum brasilense	A0A2U9SD32	Azospirillum sp. M2T2B2
A0A060DLJ1	Azospirillum brasilense	D3NZQ5	Azospirillum sp. B510
A0A060DLJ1	Azospirillum brasilense	G7ZBD1	Azospirillum lipoferum 4B
A0A060DLJ1	Azospirillum brasilense	W9H2Y1	Skermanella stibiiresistens SB22
A0A060QHZ1	Asaia platycodi SF2.1	A0A060QHZ1	Asaia platycodi SF2.1
A0A060QHZ1	Asaia platycodi SF2.1	A0A0P0YIM7	Asaia bogorensis NBRC 16594
A0A062XDE4	Lactobacillus animalis	A0A062XDE4	Lactobacillus animalis
A0A062XDE4	Lactobacillus animalis	A0A087QB11	Lactobacillus gasseri SV-16A-US
A0A062XDE4	Lactobacillus animalis	A0A0R1XV35	Lactobacillus intestinalis DSM 6629
A0A062XDE4	Lactobacillus animalis	A0A0R1ZZ35	Lactobacillus animalis KCTC 3501 = DSM 20602
A0A062XDE4	Lactobacillus animalis	A0A0R2DGK8	Lactobacillus taiwanensis DSM 21401
A0A062XDE4	Lactobacillus animalis	A0A1B3PV60	Lactobacillus johnsonii
A0A062XDE4	Lactobacillus animalis	A0A1V3Y246	Lactobacillus gasseri
A0A062XDE4	Lactobacillus animalis	A0A1Y0E341	Lactobacillus gasseri
A0A062XDE4	Lactobacillus animalis	A0A244CIZ3	Lactobacillus johnsonii
A0A062XDE4	Lactobacillus animalis	A0A249NMD5	Lactobacillus gasseri DSM 14869
A0A062XDE4	Lactobacillus animalis	A0A346MSX7	Lactobacillus johnsonii
A0A062XDE4	Lactobacillus animalis	C2E3B6	Lactobacillus johnsonii ATCC 33200
A0A062XDE4	Lactobacillus animalis	D1YL53	Lactobacillus gasseri 224-1
A0A062XDE4	Lactobacillus animalis	I7L5A9	Lactobacillus hominis DSM 23910 = CRBIP 24.179
A0A062XDE4	Lactobacillus animalis	N1ZQX4	Lactobacillus sp. ASF360
A0A071LMH9	Mangrovibacter sp. MFB070	A0A071LMH9	Mangrovibacter sp. MFB070
A0A085GUA8	Hafnia alvei ATCC 13337	A0A085GUA8	Hafnia alvei ATCC 13337
A0A085GUA8	Hafnia alvei ATCC 13337	A0A097R1J3	Hafnia alvei FB1
A0A085GUA8	Hafnia alvei ATCC 13337	A0A377P431	Hafnia alvei
A0A087BE81	Bifidobacterium magnum	A0A087BE81	Bifidobacterium magnum
A0A087BE81	Bifidobacterium magnum	D1NS91	Bifidobacterium gallicum DSM 20093 = LMG 11596
A0A089QH55	Methylobacterium oryzae CBMB20	A0A089QH55	Methylobacterium oryzae CBMB20
A0A089QH55	Methylobacterium oryzae CBMB20	A0A0E9KA82	Methylobacterium sp. ME121
A0A089QH55	Methylobacterium oryzae CBMB20	A0A0F2L372	Azospirillum thiophilum
A0A089QH55	Methylobacterium oryzae CBMB20	A0A0L6JAR7	Methylobacterium sp. ARG-1
A0A089QH55	Methylobacterium oryzae CBMB20	A0A0N0MAD9	Bosea vaviloviae
A0A089QH55	Methylobacterium oryzae CBMB20	A0A0P0F2Q7	Azospirillum brasilense
A0A089QH55	Methylobacterium oryzae CBMB20	A0A0Q4TRL3	Methylobacterium sp. Leaf85
A0A089QH55	Methylobacterium oryzae CBMB20	A0A0Q4UMF0	Methylobacterium sp. Leaf86
A0A089QH55	Methylobacterium oryzae CBMB20	A0A0Q4X335	Methylobacterium sp. Leaf90
A0A089QH55	Methylobacterium oryzae CBMB20	A0A0Q4XQD3	Methylobacterium sp. Leaf99
A0A089QH55	Methylobacterium oryzae CBMB20	A0A0Q4YSG8	Methylobacterium sp. Leaf104
A0A089QH55	Methylobacterium oryzae CBMB20	A0A0Q5C5G3	Methylobacterium sp. Leaf123
A0A089QH55	Methylobacterium oryzae CBMB20	A0A0Q5ZKR1	Methylobacterium sp. Leaf399
A0A089QH55	Methylobacterium oryzae CBMB20	A0A0S9P0Y5	Methylobacterium sp. Leaf111
A0A089QH55	Methylobacterium oryzae CBMB20	A0A0S9PNR7	Methylobacterium sp. Leaf112
A0A089QH55	Methylobacterium oryzae CBMB20	A0A0S9SC30	Methylobacterium sp. Leaf113
A0A089QH55	Methylobacterium oryzae CBMB20	A0A0V7Z1G0	Methylobacterium sp. GXS13
A0A089QH55	Methylobacterium oryzae CBMB20	A0A0X1SE16	Methylobacterium sp. AMS5
A0A089QH55	Methylobacterium oryzae CBMB20	A0A160JD10	Azospirillum humicireducens
A0A089QH55	Methylobacterium oryzae CBMB20	A0A160PDY3	Methylorubrum populi
A0A089QH55	Methylobacterium oryzae CBMB20	A0A177J7A8	Methylorubrum populi
A0A089QH55	Methylobacterium oryzae CBMB20	A0A1E3GXF9	Methylobrevis pamukkalensis
A0A089QH55	Methylobacterium oryzae CBMB20	A0A1G4TYJ8	Ancylobacter rudongensis
A0A089QH55	Methylobacterium oryzae CBMB20	A0A1G5UAJ4	Methylobacterium sp. UNC378MF
A0A089QH55	Methylobacterium oryzae CBMB20	A0A1G9QYP0	Methylobacterium phyllostachyos
A0A089QH55	Methylobacterium oryzae CBMB20	A0A1I2X8Z8	Methylobacterium gossipiicola
A0A089QH55	Methylobacterium oryzae CBMB20	A0A1I3LQE9	Methylobacterium brachiatum
A0A089QH55	Methylobacterium oryzae CBMB20	A0A1I4DMZ0	Methylorubrum salsuginis
A0A089QH55	Methylobacterium oryzae CBMB20	A0A1I4MW24	Methylobacterium pseudosasicola
A0A089QH55	Methylobacterium oryzae CBMB20	A0A1I6QIK8	Methylobacterium sp. yr668
A0A089QH55	Methylobacterium oryzae CBMB20	A0A1P8QJ50	Methylorubrum extorquens
A0A089QH55	Methylobacterium oryzae CBMB20	A0A1X7HC77	Azospirillum oryzae
A0A089QH55	Methylobacterium oryzae CBMB20	A0A1X7Q0I5	Azospirillum lipoferum
A0A089QH55	Methylobacterium oryzae CBMB20	A0A257XXS2	Azorhizobium sp. 12-66-6
A0A089QH55	Methylobacterium oryzae CBMB20	A0A257ZQH3	Rhizobiales bacterium 12-68-15
A0A089QH55	Methylobacterium oryzae CBMB20	A0A258DPR0	Rhizobiales bacterium 32-66-8
A0A089QH55	Methylobacterium oryzae CBMB20	A0A258IA70	Rhizobiales bacterium 32-66-11
A0A089QH55	Methylobacterium oryzae CBMB20	A0A258RTW2	Rhizobiales bacterium 35-66-30
A0A089QH55	Methylobacterium oryzae CBMB20	A0A2B8B0A1	Azospirillum sp. B2
A0A089QH55	Methylobacterium oryzae CBMB20	A0A2C9DD68	Hartmannibacter diazotrophicus
A0A089QH55	Methylobacterium oryzae CBMB20	A0A2H6BK65	Methylopila sp. Yamaguchi
A0A089QH55	Methylobacterium oryzae CBMB20	A0A2M6XLA7	Methylobacterium sp. CG09_land_8_20_14_0_10_71_15
A0A089QH55	Methylobacterium oryzae CBMB20	A0A2S1XNU6	Azospirillum sp. TSH58
A0A089QH55	Methylobacterium oryzae CBMB20	A0A2S4LEM3	Methylobacterium sp. V23
A0A089QH55	Methylobacterium oryzae CBMB20	A0A2T5XBY1	Methylobacterium sp. GV104
A0A089QH55	Methylobacterium oryzae CBMB20	A0A2U1VAV6	Azospirillum sp. TSO35-2
A0A089QH55	Methylobacterium oryzae CBMB20	A0A2U1VDI3	Azospirillum sp. TSO22-1
A0A089QH55	Methylobacterium oryzae CBMB20	A0A2U1WAA1	Azospirillum sp. TSA6c
A0A089QH55	Methylobacterium oryzae CBMB20	A0A2U1XC99	Azospirillum sp. TSH20
A0A089QH55	Methylobacterium oryzae CBMB20	A0A2U1XE42	Azospirillum sp. TSH100
A0A089QH55	Methylobacterium oryzae CBMB20	A0A2U1XP51	Azospirillum sp. TSH64
A0A089QH55	Methylobacterium oryzae CBMB20	A0A2U8HQ59	Methylobacterium sp. DM1
A0A089QH55	Methylobacterium oryzae CBMB20	A0A2U8VQK1	Methylobacterium sp. 17Sr1-43
A0A089QH55	Methylobacterium oryzae CBMB20	A0A2U9S4S1	Azospirillum sp. M2T2B2
A0A089QH55	Methylobacterium oryzae CBMB20	A0A2V3TWJ8	Methylobacterium sp. B4
A0A089QH55	Methylobacterium oryzae CBMB20	A0A2W5KMD9	Starkeya novella
A0A089QH55	Methylobacterium oryzae CBMB20	A0A2W5THU9	Starkeya novella
A0A089QH55	Methylobacterium oryzae CBMB20	A0A370L069	Bosea sp. RCAM04685
A0A089QH55	Methylobacterium oryzae CBMB20	A8IM23	Azorhizobium caulinodans ORS 571
A0A089QH55	Methylobacterium oryzae CBMB20	B0UIN3	Methylobacterium sp. 4-46
A0A089QH55	Methylobacterium oryzae CBMB20	B8IFZ2	Methylobacterium nodulans ORS 2060
A0A089QH55	Methylobacterium oryzae CBMB20	D3NXU3	Azospirillum sp. B510
A0A089QH55	Methylobacterium oryzae CBMB20	D7A6Q9	Starkeya novella DSM 506
A0A089QH55	Methylobacterium oryzae CBMB20	G7Z846	Azospirillum lipoferum 4B
A0A089QH55	Methylobacterium oryzae CBMB20	I9WRJ4	Methylobacterium sp. GXF4
A0A089QH55	Methylobacterium oryzae CBMB20	M7Y8F1	Methylobacterium mesophilicum SR1.6/6
A0A099YDY1	Lactobacillus mucosae	A0A099YDY1	Lactobacillus mucosae
A0A099YDY1	Lactobacillus mucosae	A0A0D4CLJ2	Lactobacillus mucosae LM1
A0A099YDY1	Lactobacillus mucosae	A0A0R1PD33	Lactobacillus mucosae DSM 13345
A0A099YDY1	Lactobacillus mucosae	A0A0R1UNQ7	Lactobacillus equigenerosi DSM 18793 = JCM 14505
A0A099YDY1	Lactobacillus mucosae	A0A2Z4W0V4	Lactobacillus murinus
A0A099YDY1	Lactobacillus mucosae	A0A358LW80	Lactobacillus sp.
A0A099YDY1	Lactobacillus mucosae	N1ZX31	Lactobacillus murinus ASF361
A0A0A0D1R6	Inquilinus limosus MP06	A0A0A0D1R6	Inquilinus limosus MP06
A0A0A0D1R6	Inquilinus limosus MP06	A0A211YT81	Inquilinus limosus
A0A0B3T848	Pandoraea pnomenusa	A0A0B3T848	Pandoraea pnomenusa
A0A0B3T848	Pandoraea pnomenusa	A0A0B5FEQ5	Pandoraea apista
A0A0B3T848	Pandoraea pnomenusa	A0A0C5JYW1	Pandoraea vervacti
A0A0B3T848	Pandoraea pnomenusa	A0A0E3YB57	Pandoraea oxalativorans
A0A0B3T848	Pandoraea pnomenusa	A0A0H3WYF5	Pandoraea faecigallinarum
A0A0B3T848	Pandoraea pnomenusa	A0A0U2MI77	Pandoraea norimbergensis
A0A0B3T848	Pandoraea pnomenusa	A0A1E3LHG4	Pandoraea sp. ISTKB
A0A0B3T848	Pandoraea pnomenusa	A0A1Q4CFP4	Pandoraea sp. 64-18
A0A0B3T848	Pandoraea pnomenusa	A0A239SMI5	Pandoraea sputorum
A0A0B3T848	Pandoraea pnomenusa	A0A378YWG5	Pandoraea pnomenusa
A0A0B3T848	Pandoraea pnomenusa	A0A378Z0N9	Pandoraea pulmonicola
A0A0B3T848	Pandoraea pnomenusa	R7X0I4	Pandoraea sp. SD6-2
A0A0B6S0I9	Burkholderia glumae PG1	A0A0B6S0I9	Burkholderia glumae PG1
A0A0B6S0I9	Burkholderia glumae PG1	A0A158EMY2	Caballeronia sordidicola
A0A0B6S0I9	Burkholderia glumae PG1	A0A1L6HXB7	Paraburkholderia sp. SOS3
A0A0B6S0I9	Burkholderia glumae PG1	A0A328X6L1	Paraburkholderia unamae
A0A0C2JBP4	Streptomonospora alba	A0A0C2JBP4	Streptomonospora alba
A0A0D4DI21	Streptomyces lydicus	A0A059WC78	Streptomyces albulus
A0A0D4DI21	Streptomyces lydicus	A0A0A8ELE8	Streptomyces sp. 769
A0A0D4DI21	Streptomyces lydicus	A0A0D4DI21	Streptomyces lydicus
A0A0D4DI21	Streptomyces lydicus	A0A0L8MY03	Streptomyces griseoflavus
A0A0D4DI21	Streptomyces lydicus	A0A0L8NXR0	Kitasatospora aureofaciens
A0A0D4DI21	Streptomyces lydicus	A0A0L8QFL2	Streptomyces varsoviensis
A0A0D4DI21	Streptomyces lydicus	A0A0M8R7X6	Streptomyces rimosus subsp. rimosus
A0A0D4DI21	Streptomyces lydicus	A0A0M8REH3	Streptomyces sp. NRRL F-5755
A0A0D4DI21	Streptomyces lydicus	A0A0M8RS53	Streptomyces rimosus subsp. pseudoverticillatus
A0A0D4DI21	Streptomyces lydicus	A0A0N1JW75	Streptomyces chattanoogensis
A0A0D4DI21	Streptomyces lydicus	A0A109B703	Streptomyces albus subsp. albus
A0A0D4DI21	Streptomyces lydicus	A0A1B2GNG9	Streptomyces noursei ATCC 11455
A0A0D4DI21	Streptomyces lydicus	A0A1M7DNM2	Streptomyces yunnanensis
A0A0D4DI21	Streptomyces lydicus	A0A1Q4VSG4	Streptomyces sp. CB02923
A0A0D4DI21	Streptomyces lydicus	A0A2K9FCF5	Streptomyces sp. CMB-StM0423
A0A0D4DI21	Streptomyces lydicus	A0A2M9M323	Streptomyces sp. CB02959
A0A0D4DI21	Streptomyces lydicus	X0N0A4	Streptomyces albulus PD-1
A0A0D6JC73	Candidatus Filomicrobium marinum	A0A0D6JC73	Candidatus Filomicrobium marinum
A0A0D6JC73	Candidatus Filomicrobium marinum	A0A124IME0	Alphaproteobacteria bacterium BRH_c36
A0A0D7F737	Rhodopseudomonas palustris	A0A0D7F737	Rhodopseudomonas palustris
A0A0D7F747	Rhodopseudomonas palustris	A0A0D7F747	Rhodopseudomonas palustris
A0A0D7F747	Rhodopseudomonas palustris	A0A354UZH5	Acetobacteraceae bacterium
A0A0E3ZJ48	Polynucleobacter duraquae	A0A0E3ZJ48	Polynucleobacter duraquae
A0A0E3ZJ48	Polynucleobacter duraquae	A0A191UFT4	Polynucleobacter wuianus
A0A0E3ZJ48	Polynucleobacter duraquae	A0A1J0D4J2	Polynucleobacter asymbioticus
A0A0E3ZJ48	Polynucleobacter duraquae	A0A1L9GLB0	Polynucleobacter sp. MWH-Adler-W8
A0A0E3ZJ48	Polynucleobacter duraquae	A0A1R0HD06	Polynucleobacter sphagniphilus
A0A0E3ZJ48	Polynucleobacter duraquae	A0A1S2T381	Polynucleobacter sp. QLW-P1DATA-2
A0A0E3ZJ48	Polynucleobacter duraquae	A0A210RZV0	Polynucleobacter hirudinilacicola
A0A0E3ZJ48	Polynucleobacter duraquae	A0A240E225	Polynucleobacter meluiroseus
A0A0E3ZJ48	Polynucleobacter duraquae	A0A254Q3M7	Polynucleobacter aenigmaticus
A0A0E3ZJ48	Polynucleobacter duraquae	A0A254Q6D7	Polynucleobacter campilacus
A0A0E3ZJ48	Polynucleobacter duraquae	A0A259D1B2	Polynucleobacter sp. 24-46-87
A0A0E3ZJ48	Polynucleobacter duraquae	A0A259IG52	Polynucleobacter sp. 39-46-10
A0A0E3ZJ48	Polynucleobacter duraquae	A0A259IPW2	Polynucleobacter sp. 39-46-10
A0A0E3ZJ48	Polynucleobacter duraquae	A0A2M8VJB5	Polynucleobacter sp. UB-Domo-W1
A0A0E3ZJ48	Polynucleobacter duraquae	A0A2Z4JGK2	Polynucleobacter sp. MWH-Creno-4B4
A0A0E3ZJ48	Polynucleobacter duraquae	A0A2Z4JKW8	Polynucleobacter asymbioticus
A0A0E3ZJ48	Polynucleobacter duraquae	A0A2Z4JTA8	Polynucleobacter asymbioticus
A0A0E3ZJ48	Polynucleobacter duraquae	A0A330FSW2	Polynucleobacter sp. FUKU-NW-11
A0A0E3ZJ48	Polynucleobacter duraquae	A0A354Y200	Polynucleobacter sp.
A0A0E3ZJ48	Polynucleobacter duraquae	A4SWJ4	Polynucleobacter asymbioticus QLW-P1DMWA-1
A0A0E3ZJ48	Polynucleobacter duraquae	M1SM30	beta proteobacterium CB
A0A0F5W5H2	Streptomyces sp. WM6386	A0A0F5W5H2	Streptomyces sp. WM6386
A0A0F5W5H2	Streptomyces sp. WM6386	A0A0K8PM01	Streptomyces azureus
A0A0F5W5H2	Streptomyces sp. WM6386	A0A0Q6Y036	Streptomyces sp. Root369
A0A0F5W5H2	Streptomyces sp. WM6386	A0A101N6R8	Streptomyces pseudovenezuelae
A0A0F5W5H2	Streptomyces sp. WM6386	A0A101P984	Streptomyces canus
A0A0F5W5H2	Streptomyces sp. WM6386	A0A101RTK5	Streptomyces canus
A0A0F5W5H2	Streptomyces sp. WM6386	A0A117QDX6	Streptomyces antibioticus
A0A0F5W5H2	Streptomyces sp. WM6386	A0A117R2A9	Streptomyces griseorubiginosus
A0A0F5W5H2	Streptomyces sp. WM6386	A0A1V4E1V4	Streptomyces sp. GKU 895
A0A0F5W5H2	Streptomyces sp. WM6386	A0A243RZK7	Streptomyces swartbergensis
A0A0F5W5H2	Streptomyces sp. WM6386	A0A285CDL5	Streptomyces sp. TLI_55
A0A0F5W5H2	Streptomyces sp. WM6386	A0A2U2ZPL5	Streptomyces sp. Act143
A0A0F5W5H2	Streptomyces sp. WM6386	B5I9A4	Streptomyces sviceus ATCC 29083
A0A0F5W5H2	Streptomyces sp. WM6386	L7EYD9	Streptomyces turgidiscabies Car8
A0A0G3EP86	Pandoraea thiooxydans	A0A0G3EP86	Pandoraea thiooxydans
A0A0H2QXU0	Moellerella wisconsensis	A0A0H2QXU0	Moellerella wisconsensis
A0A0H2QXU0	Moellerella wisconsensis	A0A0N0IB95	Moellerella wisconsensis ATCC 35017
A0A0J9E8S5	Candidatus Rhodobacter lobularis	A0A0J9E8S5	Candidatus Rhodobacter lobularis
A0A0J9E8S5	Candidatus Rhodobacter lobularis	A0A0L1JS35	Pseudaestuariivita atlantica
A0A0J9E8S5	Candidatus Rhodobacter lobularis	A0A2D7K0U2	Marinovum sp.
A0A0J9E8S5	Candidatus Rhodobacter lobularis	A0A2E7WJN2	Marinovum sp.
A0A0J9E8S5	Candidatus Rhodobacter lobularis	A0A2E8YDH9	Thiotrichales bacterium
A0A0J9E8S5	Candidatus Rhodobacter lobularis	A0A2R8BNV8	Defluviimonas aquaemixtae
A0A0J9E8S5	Candidatus Rhodobacter lobularis	A0A357FB90	Rhodobacteraceae bacterium
A0A0J9E8S5	Candidatus Rhodobacter lobularis	A0A357LT67	Rhodobacteraceae bacterium
A0A0J9E8S5	Candidatus Rhodobacter lobularis	B9NWG1	Rhodobacteraceae bacterium KLH11
A0A0K3AZ16	Kibdelosporangium sp. MJ126-NF4	A0A0K3AZ16	Kibdelosporangium sp. MJ126-NF4
A0A0K3AZ16	Kibdelosporangium sp. MJ126-NF4	A0A0N9I971	Kibdelosporangium phytohabitans
A0A0K3AZ16	Kibdelosporangium sp. MJ126-NF4	A0A1V2QF21	Actinosynnema sp. ALI-1.44
A0A0K3AZ16	Kibdelosporangium sp. MJ126-NF4	A0A1Y5XX04	Kibdelosporangium aridum
A0A0L8QWJ2	Streptomyces varsoviensis	A0A0L8QWJ2	Streptomyces varsoviensis
A0A0L8QWJ2	Streptomyces varsoviensis	A0A1C5C340	Streptomyces sp. MnatMP-M17
A0A0L8QWJ2	Streptomyces varsoviensis	A0A1V9KI45	Streptomyces sp. M41(2017)
A0A0L8QWJ2	Streptomyces varsoviensis	A0A239KLF5	Streptomyces glauciniger
A0A0L8QWJ2	Streptomyces varsoviensis	A0A2G5IQF5	Streptomyces sp. HG99
A0A0L8QWJ2	Streptomyces varsoviensis	A0A2T7T1I1	Streptomyces scopuliridis RB72
A0A0M8XQF3	Nocardiopsis sp. NRRL B-16309	A0A0M8XQF3	Nocardiopsis sp. NRRL B-16309
A0A0M8XQF3	Nocardiopsis sp. NRRL B-16309	A0A1M6WPG2	Nocardiopsis flavescens
A0A0M8XQF3	Nocardiopsis sp. NRRL B-16309	A0A1Q4XF08	Nocardiopsis sp. TSRI0078
A0A0M8XQF3	Nocardiopsis sp. NRRL B-16309	A0A1T4JVT3	Marinactinospora thermotolerans DSM 45154
A0A0M8XQF3	Nocardiopsis sp. NRRL B-16309	A0A1V3C4C7	Nocardiopsis sinuspersici
A0A0M8XQF3	Nocardiopsis sp. NRRL B-16309	A0A223QIH8	Nocardiopsis dassonvillei
A0A0M8XQF3	Nocardiopsis sp. NRRL B-16309	A0A2A6ET00	Glycomyces fuscus
A0A0M8XQF3	Nocardiopsis sp. NRRL B-16309	A0A317M7F1	Nocardiopsis sp. L17-MgMaSL7
A0A0M8XQF3	Nocardiopsis sp. NRRL B-16309	A0A368T0N7	Marinateneraspora sediminis
A0A0N0AUZ7	Saccharothrix sp. NRRL B-16348	A0A0N0AUZ7	Saccharothrix sp. NRRL B-16348
A0A0N0AUZ7	Saccharothrix sp. NRRL B-16348	A0A1H2T705	Amycolatopsis xylanica
A0A0N0AUZ7	Saccharothrix sp. NRRL B-16348	A0A1V2QG05	Saccharothrix sp. ALI-22-I
A0A0N0AUZ7	Saccharothrix sp. NRRL B-16348	M2Q205	Amycolatopsis azurea DSM 43854
A0A0N0MAD6	Bosea vaviloviae	A0A0A1PPP9	bacterium YEK0313
A0A0N0MAD6	Bosea vaviloviae	A0A0N0MAD6	Bosea vaviloviae
A0A0N0MAD6	Bosea vaviloviae	A0A0Q9H5U8	Bosea sp. Root381
A0A0N0MAD6	Bosea vaviloviae	A0A0Q9ITE4	Bosea sp. Root483D1
A0A0N0MAD6	Bosea vaviloviae	A0A124GBZ4	Bosea sp. WAO
A0A0N0MAD6	Bosea vaviloviae	A0A1I1DW84	Bosea sp. DSM 18164
A0A0N0MAD6	Bosea vaviloviae	A0A318X835	Bosea sp. CF476
A0A0N0MAD6	Bosea vaviloviae	A0A370LBN7	Bosea sp. RCAM04685
A0A0N8GF87	Prosthecomicrobium hirschii	A0A0N8GF87	Prosthecomicrobium hirschii
A0A0N8GF87	Prosthecomicrobium hirschii	A0A2C9DBQ5	Hartmannibacter diazotrophicus
A0A0Q4TGP0	Methylobacterium sp. Leaf85	A0A0Q4TGP0	Methylobacterium sp. Leaf85
A0A0Q4TGP0	Methylobacterium sp. Leaf85	A0A0Q4ULV2	Methylobacterium sp. Leaf86
A0A0Q4TGP0	Methylobacterium sp. Leaf85	A0A0Q4XVY8	Methylobacterium sp. Leaf99
A0A0Q4TGP0	Methylobacterium sp. Leaf85	A0A0Q4XYG0	Methylobacterium sp. Leaf93
A0A0Q4TGP0	Methylobacterium sp. Leaf85	A0A0Q4YS67	Methylobacterium sp. Leaf104
A0A0Q4TGP0	Methylobacterium sp. Leaf85	A0A0Q5CDQ1	Methylobacterium sp. Leaf125
A0A0Q4TGP0	Methylobacterium sp. Leaf85	A0A0S9PQE0	Methylobacterium sp. Leaf111
A0A0Q4TGP0	Methylobacterium sp. Leaf85	A0A0S9QBH5	Methylobacterium sp. Leaf112
A0A0Q4TGP0	Methylobacterium sp. Leaf85	A0A0S9SCM5	Methylobacterium sp. Leaf113
A0A0Q4TGP0	Methylobacterium sp. Leaf85	A0A1I2XAV1	Methylobacterium gossipiicola
A0A0Q4TGP0	Methylobacterium sp. Leaf85	A0A2S4LEJ3	Methylobacterium sp. V23
A0A0Q4TGP0	Methylobacterium sp. Leaf85	A0A2T5XBV6	Methylobacterium sp. GV104
A0A0Q4WNW4	Methylobacterium sp. Leaf90	A0A0Q4WNW4	Methylobacterium sp. Leaf90
A0A0Q4WNW4	Methylobacterium sp. Leaf90	A0A0Q5CFT1	Methylobacterium sp. Leaf123
A0A0Q4WNW4	Methylobacterium sp. Leaf90	A0A0Q6D5H0	Methylobacterium sp. Leaf456
A0A0Q4WNW4	Methylobacterium sp. Leaf90	A0A0X1SE33	Methylobacterium sp. AMS5
A0A0Q4WNW4	Methylobacterium sp. Leaf90	A0A169QS22	Methylorubrum populi
A0A0Q4WNW4	Methylobacterium sp. Leaf90	A0A177J907	Methylorubrum populi
A0A0Q4WNW4	Methylobacterium sp. Leaf90	A0A1I4MTN0	Methylorubrum salsuginis
A0A0Q4WNW4	Methylobacterium sp. Leaf90	A0A2U8HP03	Methylobacterium sp. DM1
A0A0Q4WNW4	Methylobacterium sp. Leaf90	A0A2V3U8X3	Methylobacterium sp. B4
A0A0Q4WNW4	Methylobacterium sp. Leaf90	B7KR54	Methylorubrum extorquens CM4
A0A0Q6WDY1	Massilia sp. Root351	A0A0Q6WDY1	Massilia sp. Root351
A0A0Q6WDY1	Massilia sp. Root351	A0A0Q7EQE3	Massilia sp. Root418
A0A0Q6WDY1	Massilia sp. Root351	A0A1S2NBH2	Massilia timonae
A0A0Q6WDY1	Massilia sp. Root351	A0A2G8T3R3	Massilia psychrophila
A0A0Q6WDY1	Massilia sp. Root351	A0A2S2DF99	Massilia oculi
A0A0Q6WDY1	Massilia sp. Root351	A0A2T5T9K2	Massilia sp. GV045
A0A0R0LLQ9	Ferrovum sp. JA12	A0A0R0LLQ9	Ferrovum sp. JA12
A0A0R0LLQ9	Ferrovum sp. JA12	A0A149VSZ7	Ferrovum sp. PN-J185
A0A0R1UH43	Lactobacillus kalixensis DSM 16043	A0A0R1UH43	Lactobacillus kalixensis DSM 16043
A0A0R1UH43	Lactobacillus kalixensis DSM 16043	A0A356SWG6	Lactobacillus sp.
A0A0R1UH43	Lactobacillus kalixensis DSM 16043	G1U9U4	Lactobacillus acidophilus
A0A0R1YA23	Lactobacillus aviarius subsp. aviarius DSM 20655	A0A0R1VB05	Lactobacillus gastricus DSM 16045
A0A0R1YA23	Lactobacillus aviarius subsp. aviarius DSM 20655	A0A0R1YA23	Lactobacillus aviarius subsp. aviarius DSM 20655
A0A0R1YA23	Lactobacillus aviarius subsp. aviarius DSM 20655	A0A179CRB0	Lactobacillus aviarius
A0A0R2TNQ1	Rhodobacter sp. BACL10 MAG-120910-bin24	A0A0R2TNQ1	Rhodobacter sp. BACL10 MAG-120910-bin24
A0A0R2TNQ1	Rhodobacter sp. BACL10 MAG-120910-bin24	A0A1I7D9W8	Sedimentitalea nanhaiensis
A0A0R2TNQ1	Rhodobacter sp. BACL10 MAG-120910-bin24	A0A1Z9K2G5	Gammaproteobacteria bacterium TMED183
A0A0R2TNQ1	Rhodobacter sp. BACL10 MAG-120910-bin24	A0A2D4UPL4	Candidatus Puniceispirillum sp.
A0A0S2PGR5	Streptomyces hygroscopicus subsp. limoneus	A0A0S2PGR5	Streptomyces hygroscopicus subsp. limoneus
A0A0S2PGR5	Streptomyces hygroscopicus subsp. limoneus	A0A101PUR6	Streptomyces corchorusii
A0A0S2PGR5	Streptomyces hygroscopicus subsp. limoneus	A0A2S4ZT19	Streptomyces sp. Ru62
A0A0S2PGR5	Streptomyces hygroscopicus subsp. limoneus	H2JXY4	Streptomyces hygroscopicus subsp. jinggangensis 50
A0A0S3PPA2	Variibacter gotjawalensis	A0A0S3PPA2	Variibacter gotjawalensis
A0A127ER80	Rhodoplanes sp. Z2-YC6860	A0A127ER80	Rhodoplanes sp. Z2-YC6860
A0A127ER80	Rhodoplanes sp. Z2-YC6860	A0A1Q7BLN9	Alphaproteobacteria bacterium 13_2_20CM_2_64_7
A0A127ER80	Rhodoplanes sp. Z2-YC6860	A0A363TSB3	Bradyrhizobiaceae bacterium
A0A127JTD6	Ramlibacter tataouinensis	A0A127JTD6	Ramlibacter tataouinensis
A0A127JUM5	Ramlibacter tataouinensis	A0A127JUM5	Ramlibacter tataouinensis
A0A139BQ01	Candidatus Gallionella acididurans	A0A139BQ01	Candidatus Gallionella acididurans
A0A139BQ01	Candidatus Gallionella acididurans	A0A1E4PS56	Rubrivivax sp. SCN 70-15
A0A139BQ01	Candidatus Gallionella acididurans	A0A1H3P9Y1	Collimonas sp. OK242
A0A149US26	Acetobacter malorum	A0A063X1Z2	Acetobacter aceti 1023
A0A149US26	Acetobacter malorum	A0A149US26	Acetobacter malorum
A0A149US26	Acetobacter malorum	A0A1A0DAE1	Acetobacter pasteurianus
A0A149US26	Acetobacter malorum	A0A1Y0V5H0	Acetobacter ascendens
A0A149US26	Acetobacter malorum	A0A346DYP2	Acetobacter pomorum
A0A149US26	Acetobacter malorum	A0A368A992	Acetobacter pasteurianus
A0A149US26	Acetobacter malorum	A9X6P7	Acetobacter aceti
A0A149US26	Acetobacter malorum	C7JBA8	Acetobacter pasteurianus IFO 3283-01
A0A149US26	Acetobacter malorum	S6D9Z1	Acetobacter pasteurianus 386B
A0A149VZB0	Ferrovum sp. Z-31	A0A149VZB0	Ferrovum sp. Z-31
A0A158AU22	Caballeronia ptereochthonis	A0A038GXA8	Caballeronia jiangsuensis
A0A158AU22	Caballeronia ptereochthonis	A0A060P5U0	Burkholderia sp. RPE67
A0A158AU22	Caballeronia ptereochthonis	A0A069NUV2	Caballeronia grimmiae
A0A158AU22	Caballeronia ptereochthonis	A0A069PKL1	Caballeronia glathei
A0A158AU22	Caballeronia ptereochthonis	A0A0A6QC90	Paraburkholderia sacchari
A0A158AU22	Caballeronia ptereochthonis	A0A0C2C764	Burkholderia sp. MR1
A0A158AU22	Caballeronia ptereochthonis	A0A0D5VMF0	Paraburkholderia fungorum
A0A158AU22	Caballeronia ptereochthonis	A0A0J1D0H6	Caballeronia mineralivorans PML1(12)
A0A158AU22	Caballeronia ptereochthonis	A0A0L0MHX7	Candidatus Burkholderia verschuerenii
A0A158AU22	Caballeronia ptereochthonis	A0A0M4PIJ3	Burkholderia sp. HB1
A0A158AU22	Caballeronia ptereochthonis	A0A0P0REU9	Paraburkholderia caribensis MBA4
A0A158AU22	Caballeronia ptereochthonis	A0A0P0RF91	Paraburkholderia caribensis MBA4
A0A158AU22	Caballeronia ptereochthonis	A0A0Q5NH53	Burkholderia sp. Leaf177
A0A158AU22	Caballeronia ptereochthonis	A0A0Q5NYX6	Burkholderia sp. Leaf177
A0A158AU22	Caballeronia ptereochthonis	A0A120KYA6	Burkholderia sp. PAMC 26561
A0A158AU22	Caballeronia ptereochthonis	A0A125SMV4	Burkholderia sp. PAMC 26561
A0A158AU22	Caballeronia ptereochthonis	A0A126YRM5	Burkholderia sp. PAMC 28687
A0A158AU22	Caballeronia ptereochthonis	A0A142Z157	Paraburkholderia caribensis
A0A158AU22	Caballeronia ptereochthonis	A0A149PDX7	Paraburkholderia monticola
A0A158AU22	Caballeronia ptereochthonis	A0A149R1A8	Caballeronia megalochromosomata
A0A158AU22	Caballeronia ptereochthonis	A0A157Z0Q5	Caballeronia glebae
A0A158AU22	Caballeronia ptereochthonis	A0A158AC54	Caballeronia calidae
A0A158AU22	Caballeronia ptereochthonis	A0A158ADN2	Caballeronia temeraria
A0A158AU22	Caballeronia ptereochthonis	A0A158AEG1	Caballeronia pedi
A0A158AU22	Caballeronia ptereochthonis	A0A158AU22	Caballeronia ptereochthonis
A0A158AU22	Caballeronia ptereochthonis	A0A158B3R9	Caballeronia arationis
A0A158AU22	Caballeronia ptereochthonis	A0A158C8V2	Caballeronia hypogeia
A0A158AU22	Caballeronia ptereochthonis	A0A158CEX6	Caballeronia catudaia
A0A158AU22	Caballeronia ptereochthonis	A0A158DPV5	Caballeronia fortuita
A0A158AU22	Caballeronia ptereochthonis	A0A158F8P2	Caballeronia arvi
A0A158AU22	Caballeronia ptereochthonis	A0A158FMB6	Caballeronia udeis
A0A158AU22	Caballeronia ptereochthonis	A0A158FUB8	Caballeronia sordidicola
A0A158AU22	Caballeronia ptereochthonis	A0A158GIQ4	Caballeronia turbans
A0A158AU22	Caballeronia ptereochthonis	A0A158GRF6	Caballeronia sordidicola
A0A158AU22	Caballeronia ptereochthonis	A0A158H5F6	Caballeronia humi
A0A158AU22	Caballeronia ptereochthonis	A0A158IFX3	Caballeronia cordobensis
A0A158AU22	Caballeronia ptereochthonis	A0A158IL15	Caballeronia choica
A0A158AU22	Caballeronia ptereochthonis	A0A158J802	Caballeronia terrestris
A0A158AU22	Caballeronia ptereochthonis	A0A158JC62	Caballeronia telluris
A0A158AU22	Caballeronia ptereochthonis	A0A158JRT6	Caballeronia peredens
A0A158AU22	Caballeronia ptereochthonis	A0A161I862	Burkholderia sp. OLGA172
A0A158AU22	Caballeronia ptereochthonis	A0A1A9N263	Paraburkholderia ginsengiterrae
A0A158AU22	Caballeronia ptereochthonis	A0A1G8C5U4	Burkholderia sp. yr281
A0A158AU22	Caballeronia ptereochthonis	A0A1G8C8X6	Burkholderia sp. yr281
A0A158AU22	Caballeronia ptereochthonis	A0A1H1HDG4	Paraburkholderia fungorum
A0A158AU22	Caballeronia ptereochthonis	A0A1H1JXW6	Paraburkholderia tuberum
A0A158AU22	Caballeronia ptereochthonis	A0A1H4FI45	Paraburkholderia sartisoli
A0A158AU22	Caballeronia ptereochthonis	A0A1H5MDB1	Burkholderia sp. WP9
A0A158AU22	Caballeronia ptereochthonis	A0A1H6P8Z3	Paraburkholderia hospita
A0A158AU22	Caballeronia ptereochthonis	A0A1H6PP12	Paraburkholderia hospita
A0A158AU22	Caballeronia ptereochthonis	A0A1H7EJ43	Paraburkholderia diazotrophica
A0A158AU22	Caballeronia ptereochthonis	A0A1I3EIK0	Paraburkholderia megapolitana
A0A158AU22	Caballeronia ptereochthonis	A0A1I6ZAB1	Paraburkholderia aspalathi
A0A158AU22	Caballeronia ptereochthonis	A0A1I9YMJ2	Paraburkholderia sprentiae WSM5005
A0A158AU22	Caballeronia ptereochthonis	A0A1J5RQA6	mine drainage metagenome
A0A158AU22	Caballeronia ptereochthonis	A0A1J5SEW4	mine drainage metagenome
A0A158AU22	Caballeronia ptereochthonis	A0A1L6I5K6	Paraburkholderia sp. SOS3
A0A158AU22	Caballeronia ptereochthonis	A0A1M6N284	Paraburkholderia terricola
A0A158AU22	Caballeronia ptereochthonis	A0A1M6NGI3	Paraburkholderia terricola
A0A158AU22	Caballeronia ptereochthonis	A0A1N6H0I1	Paraburkholderia phenazinium
A0A158AU22	Caballeronia ptereochthonis	A0A1N6KKE2	Paraburkholderia phenazinium
A0A158AU22	Caballeronia ptereochthonis	A0A1N6LP17	Burkholderia sp. GAS332
A0A158AU22	Caballeronia ptereochthonis	A0A1N7SDA0	Paraburkholderia ribeironis
A0A158AU22	Caballeronia ptereochthonis	A0A1Q8IR37	Burkholderia sp. SRS-W-2-2016
A0A158AU22	Caballeronia ptereochthonis	A0A1X0MUZ7	Burkholderia sp. A27
A0A158AU22	Caballeronia ptereochthonis	A0A1X7M7M7	Paraburkholderia susongensis
A0A158AU22	Caballeronia ptereochthonis	A0A211YYY9	Burkholderia sp. Bk
A0A158AU22	Caballeronia ptereochthonis	A0A221AD49	Burkholderia sp. AD24
A0A158AU22	Caballeronia ptereochthonis	A0A226XA48	Caballeronia sordidicola
A0A158AU22	Caballeronia ptereochthonis	A0A235GGH8	Burkholderia sp. CF145
A0A158AU22	Caballeronia ptereochthonis	A0A235GH90	Burkholderia sp. CF145
A0A158AU22	Caballeronia ptereochthonis	A0A238D3P7	Thiomonas delicata
A0A158AU22	Caballeronia ptereochthonis	A0A238DRS3	Thiomonas sp. X19
A0A158AU22	Caballeronia ptereochthonis	A0A242M4P0	Caballeronia sordidicola
A0A158AU22	Caballeronia ptereochthonis	A0A242MB56	Caballeronia sordidicola
A0A158AU22	Caballeronia ptereochthonis	A0A244DP68	Paraburkholderia terrae
A0A158AU22	Caballeronia ptereochthonis	A0A248VWH2	Paraburkholderia aromaticivorans
A0A158AU22	Caballeronia ptereochthonis	A0A2A4ES56	Pseudomonas acidophila
A0A158AU22	Caballeronia ptereochthonis	A0A2C9AT54	Burkholderia sp. YR290
A0A158AU22	Caballeronia ptereochthonis	A0A2C9B9Y8	Burkholderia sp. D7
A0A158AU22	Caballeronia ptereochthonis	A0A2C9BRN4	Burkholderia sp. OK233
A0A158AU22	Caballeronia ptereochthonis	A0A2I8EQR6	Paraburkholderia terrae
A0A158AU22	Caballeronia ptereochthonis	A0A2I8EQV5	Paraburkholderia terrae
A0A158AU22	Caballeronia ptereochthonis	A0A2N7WT43	Paraburkholderia rhynchosiae
A0A158AU22	Caballeronia ptereochthonis	A0A2S8RRI4	Paraburkholderia sp. BL21I4N1
A0A158AU22	Caballeronia ptereochthonis	A0A2T0L3R6	Paraburkholderia sp. BL18I3N2
A0A158AU22	Caballeronia ptereochthonis	A0A2T0QLF8	Paraburkholderia sp. BL25I1N1
A0A158AU22	Caballeronia ptereochthonis	A0A2T1AYG4	Paraburkholderia insulsa
A0A158AU22	Caballeronia ptereochthonis	A0A2T3Y0D4	Paraburkholderia caribensis
A0A158AU22	Caballeronia ptereochthonis	A0A2U0WAG4	Paraburkholderia sp. OV555
A0A158AU22	Caballeronia ptereochthonis	A0A2U3I4A6	Burkholderia novacaledonica
A0A158AU22	Caballeronia ptereochthonis	A0A329BXS5	Paraburkholderia bryophila
A0A158AU22	Caballeronia ptereochthonis	A0A329DAH2	Burkholderia sp. yr520
A0A158AU22	Caballeronia ptereochthonis	A0A346B9W2	Paraburkholderia caffeinilytica
A0A158AU22	Caballeronia ptereochthonis	A0A370N1M1	Paraburkholderia sp. S27
A0A158AU22	Caballeronia ptereochthonis	B2JM63	Paraburkholderia phymatum STM815
A0A158AU22	Caballeronia ptereochthonis	B2T896	Paraburkholderia phytofirmans PsJN
A0A158AU22	Caballeronia ptereochthonis	B5WLQ1	Burkholderia sp. H160
A0A158AU22	Caballeronia ptereochthonis	D5WFL9	Burkholderia sp. CCGE1002
A0A158AU22	Caballeronia ptereochthonis	E1TF03	Burkholderia sp. CCGE1003
A0A158AU22	Caballeronia ptereochthonis	E6PRM1	mine drainage metagenome
A0A158AU22	Caballeronia ptereochthonis	E8YSP3	Burkholderia sp. CCGE1001
A0A158AU22	Caballeronia ptereochthonis	I2IRE2	Burkholderia sp. Ch1-1
A0A158AU22	Caballeronia ptereochthonis	K8R6X0	Burkholderia sp. SJ98
A0A158AU22	Caballeronia ptereochthonis	Q13QC0	Paraburkholderia xenovorans LB400
A0A158D0I4	Caballeronia glebae	A0A158D0I4	Caballeronia glebae
A0A158D0I4	Caballeronia glebae	A0A2U1AAR2	Paraburkholderia silvatlantica
A0A161K179	hydrothermal vent metagenome	A0A161K179	hydrothermal vent metagenome
A0A161K179	hydrothermal vent metagenome	A0A2A5X3H9	Candidatus Thioglobus sp. MED-G25
A0A161K179	hydrothermal vent metagenome	A0A2E9RDY6	Acidiferrobacteraceae bacterium
A0A161K179	hydrothermal vent metagenome	A0A349SDK1	Gammaproteobacteria bacterium
A0A161K179	hydrothermal vent metagenome	A0A381V2X0	marine metagenome
A0A174BHB6	Bifidobacterium pseudocatenulatum	A0A072MW66	Bifidobacterium pseudocatenulatum IPLA36007
A0A174BHB6	Bifidobacterium pseudocatenulatum	A0A174BHB6	Bifidobacterium pseudocatenulatum
A0A174BHB6	Bifidobacterium pseudocatenulatum	A0A1Q6EPI6	Bifidobacterium sp. 56_9_plus
A0A174BHB6	Bifidobacterium pseudocatenulatum	A0A1V8Q5N2	Bifidobacterium dentium
A0A174BHB6	Bifidobacterium pseudocatenulatum	A0A267WLW2	Bifidobacterium pseudocatenulatum
A0A174BHB6	Bifidobacterium pseudocatenulatum	A0A2G5PSF1	Bifidobacterium sp. N5G01
A0A174BHB6	Bifidobacterium pseudocatenulatum	D2Q6H4	Bifidobacterium dentium Bd1
A0A174BHB6	Bifidobacterium pseudocatenulatum	W4NCK2	Bifidobacterium moukalabense DSM 27321
A0A174S0X3	Clostridium baratii	A0A174S0X3	Clostridium baratii
A0A1A0KHK2	Mycobacterium sp. 1100029.7	A0A1A0KHK2	Mycobacterium sp. 1100029.7
A0A1A0KHK2	Mycobacterium sp. 1100029.7	A0A1A2GAJ4	Mycobacterium sp. 852002-51057_SCH5723018
A0A1A0KHK2	Mycobacterium sp. 1100029.7	A0A1E3STJ8	Mycobacterium sherrisii
A0A1A0KHK2	Mycobacterium sp. 1100029.7	A0A1X0XWY6	Mycobacterium simiae
A0A1A0KHK2	Mycobacterium sp. 1100029.7	A0A1X1TUH4	Mycobacterium florentinum
A0A1A0KHK2	Mycobacterium sp. 1100029.7	A0A1X2C468	Mycobacterium saskatchewanense
A0A1A0KHK2	Mycobacterium sp. 1100029.7	A0A2N5R3K5	Mycobacterium tuberculosis variant microti OV254
A0A1A0KHK2	Mycobacterium sp. 1100029.7	A0A2R5H3G7	Mycobacterium montefiorense
A0A1A1YDM8	Mycobacterium sp. ACS1612	A0A1A0WWS6	Mycobacterium sp. 852013-50091_SCH5140682
A0A1A1YDM8	Mycobacterium sp. ACS1612	A0A1A1YDM8	Mycobacterium sp. ACS1612
A0A1A1YDM8	Mycobacterium sp. ACS1612	A0A370CNS1	Mycolicibacterium moriokaense
A0A1A1YDM8	Mycobacterium sp. ACS1612	L0IUZ9	Mycobacterium sp. JS623
A0A1A1YDP3	Mycobacterium sp. ACS1612	A0A1A0WWY1	Mycobacterium sp. 852013-50091_SCH5140682
A0A1A1YDP3	Mycobacterium sp. ACS1612	A0A1A1YDP3	Mycobacterium sp. ACS1612
A0A1A1YDP3	Mycobacterium sp. ACS1612	A0A370CQL5	Mycolicibacterium moriokaense
A0A1A1YDP3	Mycobacterium sp. ACS1612	L0IUQ9	Mycobacterium sp. JS623
A0A1A5XMV1	Paraburkholderia tropica	A0A1A5XMV1	Paraburkholderia tropica
A0A1A5XMV1	Paraburkholderia tropica	A0A1G6J594	Burkholderia sp. TNe-862
A0A1A5XMV1	Paraburkholderia tropica	A0A1H7QM35	Paraburkholderia caballeronis
A0A1A5XMV1	Paraburkholderia tropica	A0A2S4MIG1	Paraburkholderia eburnea
A0A1A5XMV1	Paraburkholderia tropica	A0A2U1AG37	Paraburkholderia silvatlantica
A0A1A5XMV1	Paraburkholderia tropica	A0A2W7HIV6	Paraburkholderia sp. PDC91
A0A1A5XMV1	Paraburkholderia tropica	A0A328Y6T3	Paraburkholderia unamae
A0A1B1SBJ2	Muribaculum intestinale	A0A1B1SBJ2	Muribaculum intestinale
A0A1B1WGN2	Mycobacterium sp. djl-10	A0A1B1WGN2	Mycobacterium sp. djl-10
A0A1B1WGN2	Mycobacterium sp. djl-10	A0A1H6J676	Mycolicibacterium rutilum
A0A1B1WGN2	Mycobacterium sp. djl-10	A0A1P8XAG9	Mycobacterium sp. MS1601
A0A1B1WGN2	Mycobacterium sp. djl-10	A0A1R0TWN0	Mycolicibacter heraklionensis
A0A1B2HQP6	Lentzea guizhouensis	A0A066TRF4	Amycolatopsis rifamycinica
A0A1B2HQP6	Lentzea guizhouensis	A0A075V134	Amycolatopsis japonica
A0A1B2HQP6	Lentzea guizhouensis	A0A0F0H8L9	Lechevalieria aerocolonigenes
A0A1B2HQP6	Lentzea guizhouensis	A0A0H3D7S7	Amycolatopsis mediterranei U32
A0A1B2HQP6	Lentzea guizhouensis	A0A1B2HQP6	Lentzea guizhouensis
A0A1B2HQP6	Lentzea guizhouensis	A0A1G8PH49	Lentzea violacea
A0A1B2HQP6	Lentzea guizhouensis	A0A1H2G1H7	Amycolatopsis keratiniphila
A0A1B2HQP6	Lentzea guizhouensis	A0A1H4W0M8	Amycolatopsis tolypomycina
A0A1B2HQP6	Lentzea guizhouensis	A0A1H5Q8E9	Amycolatopsis pretoriensis
A0A1B2HQP6	Lentzea guizhouensis	A0A1H8T7X5	Amycolatopsis saalfeldensis
A0A1B2HQP6	Lentzea guizhouensis	A0A1H9JFW1	Lentzea flaviverrucosa
A0A1B2HQP6	Lentzea guizhouensis	A0A1H9LXJ1	Lechevalieria xinjiangensis
A0A1B2HQP6	Lentzea guizhouensis	A0A1H9QDK5	Lentzea albida
A0A1B2HQP6	Lentzea guizhouensis	A0A1I6DM95	Lentzea waywayandensis
A0A1B2HQP6	Lentzea guizhouensis	A0A1K1SEZ4	Amycolatopsis australiensis
A0A1B2HQP6	Lentzea guizhouensis	A0A1W2D2Y4	Lentzea albidocapillata
A0A1B2HQP6	Lentzea guizhouensis	A0A1W2M0Z1	Amycolatopsis keratiniphila subsp. keratiniphila
A0A1B2HQP6	Lentzea guizhouensis	A0A229TEA3	Amycolatopsis sp. H5
A0A1B2HQP6	Lentzea guizhouensis	A0A2N3S176	Plantactinospora sp. CNZ320
A0A1B2HQP6	Lentzea guizhouensis	A0A2N3WUC6	Amycolatopsis niigatensis
A0A1B2HQP6	Lentzea guizhouensis	A0A2R4FEV4	Plantactinospora sp. BB1
A0A1B2HQP6	Lentzea guizhouensis	A0A2T0JZ54	Actinoplanes italicus
A0A1B2HQP6	Lentzea guizhouensis	A0A2T0T944	Umezawaea tangerina
A0A1B2HQP6	Lentzea guizhouensis	A0A316I4F4	Lechevalieria deserti
A0A1B2HQP6	Lentzea guizhouensis	R1FG81	Amycolatopsis vancoresmycina DSM 44592
A0A1C6NXS0	Streptomyces sp. WMMB 322	A0A014P1N5	Streptomyces sp. PRh5
A0A1C6NXS0	Streptomyces sp. WMMB 322	A0A1C6NRX4	Streptomyces sp. WMMB 714
A0A1C6NXS0	Streptomyces sp. WMMB 322	A0A1C6NXS0	Streptomyces sp. WMMB 322
A0A1C6NXS0	Streptomyces sp. WMMB 322	A0A1E7JTJ4	Streptomyces abyssalis
A0A1C6NXS0	Streptomyces sp. WMMB 322	A0A1E7L378	Streptomyces nanshensis
A0A1C6NXS0	Streptomyces sp. WMMB 322	A0A2S4XQL0	Streptomyces sp. Ru73
A0A1C6NXS0	Streptomyces sp. WMMB 322	A0A327VCK0	Streptomyces sp. Amel2xB2
A0A1C6NXS0	Streptomyces sp. WMMB 322	A0A346C9M9	Streptomyces sp. CB09001
A0A1E3GXU4	Methylobrevis pamukkalensis	A0A1E3GXU4	Methylobrevis pamukkalensis
A0A1E3SB62	Mycobacterium sherrisii	A0A1E3SB62	Mycobacterium sherrisii
A0A1E3SB62	Mycobacterium sherrisii	A0A1X2BZV3	Mycobacterium saskatchewanense
A0A1E3SB62	Mycobacterium sherrisii	A0A1X2D127	Mycobacterium sherrisii
A0A1E4ZRQ1	Chromatiales bacterium (ex Bugula neritina AB1)	A0A1E4ZRQ1	Chromatiales bacterium (ex Bugula neritina AB1)
A0A1F2T3R8	Acidobacteria bacterium RIFCSPLOWO2_02_FULL_67_21	A0A1F2T3R8	Acidobacteria bacterium RIFCSPLOWO2_02_FULL_67_21
A0A1F2T3R8	Acidobacteria bacterium RIFCSPLOWO2_02_FULL_67_21	A0A2V8EGT1	Acidobacteria bacterium
A0A1F2T3R8	Acidobacteria bacterium RIFCSPLOWO2_02_FULL_67_21	A0A2V8GY40	Acidobacteria bacterium
A0A1F2T3R8	Acidobacteria bacterium RIFCSPLOWO2_02_FULL_67_21	A0A2V8HVZ7	Acidobacteria bacterium
A0A1F2VE41	Acidobacteria bacterium RIFCSPLOWO2_12_FULL_67_14b	A0A1F2VE41	Acidobacteria bacterium RIFCSPLOWO2_12_FULL_67_14b
A0A1F3ZN52	Betaproteobacteria bacterium RIFCSPLOWO2_02_FULL_6	A0A1F3ZN52	Betaproteobacteria bacterium RIFCSPLOWO2_02_FULL_6
A0A1F4ANJ1	Betaproteobacteria bacterium RIFCSPLOWO2_02_FULL_6	A0A0S8B1K0	Betaproteobacteria bacterium SG8_39
A0A1F4ANJ1	Betaproteobacteria bacterium RIFCSPLOWO2_02_FULL_6	A0A0S8F3S8	Myxococcales bacterium SG8_38_1
A0A1F4ANJ1	Betaproteobacteria bacterium RIFCSPLOWO2_02_FULL_6	A0A142LM01	Betaproteobacteria bacterium UKL13-2
A0A1F4ANJ1	Betaproteobacteria bacterium RIFCSPLOWO2_02_FULL_6	A0A177QV75	Betaproteobacteria bacterium SCGC AG-212-J23
A0A1F4ANJ1	Betaproteobacteria bacterium RIFCSPLOWO2_02_FULL_6	A0A1F3YTU9	Betaproteobacteria bacterium RBG_16_64_18
A0A1F4ANJ1	Betaproteobacteria bacterium RIFCSPLOWO2_02_FULL_6	A0A1F4ANJ1	Betaproteobacteria bacterium RIFCSPLOWO2_02_FULL_6
A0A1F4ANJ1	Betaproteobacteria bacterium RIFCSPLOWO2_02_FULL_6	A0A1P8FIC4	Betaproteobacteria bacterium GR16-43
A0A1F4ANJ1	Betaproteobacteria bacterium RIFCSPLOWO2_02_FULL_6	A0A2U1RRY7	Betaproteobacteria bacterium
A0A1F4AZ71	Betaproteobacteria bacterium RIFCSPLOWO2_02_FULL_6	A0A1F4AZ71	Betaproteobacteria bacterium RIFCSPLOWO2_02_FULL_6
A0A1F4BI65	Betaproteobacteria bacterium RIFCSPLOWO2_02_FULL_6	A0A1F4BI65	Betaproteobacteria bacterium RIFCSPLOWO2_02_FULL_6
A0A1F4C9A2	Betaproteobacteria bacterium RIFCSPLOWO2_12_FULL_6	A0A1F4C9A2	Betaproteobacteria bacterium RIFCSPLOWO2_12_FULL_6
A0A1F4C9A2	Betaproteobacteria bacterium RIFCSPLOWO2_12_FULL_6	A0A1F4DUV9	Betaproteobacteria bacterium RIFCSPLOWO2_12_FULL_6
A0A1F4E4K7	Betaproteobacteria bacterium RIFCSPLOWO2_12_FULL_6	A0A1F4E4K7	Betaproteobacteria bacterium RIFCSPLOWO2_12_FULL_6
A0A1F4E4K7	Betaproteobacteria bacterium RIFCSPLOWO2_12_FULL_6	A0A1F4FD52	Betaproteobacteria bacterium RIFCSPLOWO2_12_FULL_6
A0A1F6UY35	Candidatus Muproteobacteria bacterium RBG_16_60_9	A0A1F6UY35	Candidatus Muproteobacteria bacterium RBG_16_60_9
A0A1F8W0Y7	Curvibacter sp. GWA2_64_110	A0A016XI66	Hylemonella gracilis str. Niagara R
A0A1F8W0Y7	Curvibacter sp. GWA2_64_110	A0A0H2LV76	Variovorax paradoxus
A0A1F8W0Y7	Curvibacter sp. GWA2_64_110	A0A0Q6MYP7	Variovorax sp. Root318D1
A0A1F8W0Y7	Curvibacter sp. GWA2_64_110	A0A0Q7C7A7	Variovorax sp. Root411
A0A1F8W0Y7	Curvibacter sp. GWA2_64_110	A0A0Q7HCW1	Variovorax sp. Root434
A0A1F8W0Y7	Curvibacter sp. GWA2_64_110	A0A0R0MPH2	Curvibacter sp. PAE-UM
A0A1F8W0Y7	Curvibacter sp. GWA2_64_110	A0A127JTF3	Ramlibacter tataouinensis
A0A1F8W0Y7	Curvibacter sp. GWA2_64_110	A0A139BW28	Candidatus Gallionella acididurans
A0A1F8W0Y7	Curvibacter sp. GWA2_64_110	A0A1E4PS81	Rubrivivax sp. SCN 70-15
A0A1F8W0Y7	Curvibacter sp. GWA2_64_110	A0A1F4IAS5	Burkholderiales bacterium RIFCSPHIGHO2_12_FULL_61_
A0A1F8W0Y7	Curvibacter sp. GWA2_64_110	A0A1F4JN62	Burkholderiales bacterium RIFCSPLOWO2_02_FULL_57_3
A0A1F8W0Y7	Curvibacter sp. GWA2_64_110	A0A1F8W0Y7	Curvibacter sp. GWA2_64_110
A0A1F8W0Y7	Curvibacter sp. GWA2_64_110	A0A1G8J189	Variovorax sp. OV700
A0A1F8W0Y7	Curvibacter sp. GWA2_64_110	A0A1H7K0A9	Paraburkholderia caballeronis
A0A1F8W0Y7	Curvibacter sp. GWA2_64_110	A0A1H7W2S2	Variovorax sp. YR750
A0A1F8W0Y7	Curvibacter sp. GWA2_64_110	A0A1I4UDH6	Variovorax sp. OV329
A0A1F8W0Y7	Curvibacter sp. GWA2_64_110	A0A1I7GWQ0	Polaromonas sp. YR568
A0A1F8W0Y7	Curvibacter sp. GWA2_64_110	A0A1S8FI62	Polaromonas sp. A23
A0A1F8W0Y7	Curvibacter sp. GWA2_64_110	A0A244EGZ0	Variovorax sp. JS1663
A0A1F8W0Y7	Curvibacter sp. GWA2_64_110	A0A258QCR3	Polaromonas sp. 35-63-240
A0A1F8W0Y7	Curvibacter sp. GWA2_64_110	A0A258U7V3	Polaromonas sp. 28-63-22
A0A1F8W0Y7	Curvibacter sp. GWA2_64_110	A0A2D0IB71	Curvibacter sp. PD_MW3
A0A1F8W0Y7	Curvibacter sp. GWA2_64_110	A0A2N2RPW8	Betaproteobacteria bacterium HGW-Betaproteobacteri
A0A1F8W0Y7	Curvibacter sp. GWA2_64_110	A0A2W7FM72	Paraburkholderia sp. PDC91
A0A1F8W0Y7	Curvibacter sp. GWA2_64_110	A0A353Y203	Curvibacter sp.
A0A1F8W0Y7	Curvibacter sp. GWA2_64_110	C5CK46	Variovorax paradoxus S110
A0A1F8W0Y7	Curvibacter sp. GWA2_64_110	F3KVX5	Hylemonella gracilis ATCC 19624
A0A1F8W0Y7	Curvibacter sp. GWA2_64_110	H5WKK1	Burkholderiales bacterium JOSHI_001
A0A1F8W0Y7	Curvibacter sp. GWA2_64_110	Q129S5	Polaromonas sp. JS666
A0A1G3I670	Rhodospirillales bacterium RIFCSPLOWO2_01_FULL_65_	A0A1G3I670	Rhodospirillales bacterium RIFCSPLOWO2_01_FULL_65_
A0A1G3IRM5	Rhodospirillales bacterium RIFCSPLOWO2_12_FULL_67_	A0A1G3IRM5	Rhodospirillales bacterium RIFCSPLOWO2_12_FULL_67_
A0A1G6UUF5	Cupriavidus sp. YR651	A0A022GFT3	Cupriavidus sp. SK-4
A0A1G6UUF5	Cupriavidus sp. YR651	A0A0F0FVT6	Burkholderiaceae bacterium 16
A0A1G6UUF5	Cupriavidus sp. YR651	A0A142JSK6	Cupriavidus nantongensis
A0A1G6UUF5	Cupriavidus sp. YR651	A0A1E4QWV3	Cupriavidus sp. UYMMa02A
A0A1G6UUF5	Cupriavidus sp. YR651	A0A1G6UUF5	Cupriavidus sp. YR651
A0A1G6UUF5	Cupriavidus sp. YR651	A0A1H0QNS6	Ralstonia sp. 25mfcol4.1
A0A1G6UUF5	Cupriavidus sp. YR651	A0A1H0QP34	Ralstonia sp. 25mfcol4.1
A0A1G6UUF5	Cupriavidus sp. YR651	A0A1I1QU44	Cupriavidus sp. OV038
A0A1G6UUF5	Cupriavidus sp. YR651	A0A1I1QVC9	Cupriavidus sp. OV038
A0A1G6UUF5	Cupriavidus sp. YR651	A0A1K0IRR6	Cupriavidus necator
A0A1G6UUF5	Cupriavidus sp. YR651	A0A1U9V187	Cupriavidus sp. HPC(L)
A0A1G6UUF5	Cupriavidus sp. YR651	A0A2E9S7S1	Cupriavidus sp.
A0A1G6UUF5	Cupriavidus sp. YR651	A0A2N5CA35	Cupriavidus pauculus
A0A1G6UUF5	Cupriavidus sp. YR651	A0A2N5CA64	Cupriavidus pauculus
A0A1G6UUF5	Cupriavidus sp. YR651	A0A316EU12	Cupriavidus plantarum
A0A1G6UUF5	Cupriavidus sp. YR651	A0A329AZ90	Cupriavidus alkaliphilus
A0A1G6UUF5	Cupriavidus sp. YR651	A0A356HMV5	Cupriavidus sp.
A0A1G6UUF5	Cupriavidus sp. YR651	A0A370NNF4	Cupriavidus sp. S23
A0A1G6UUF5	Cupriavidus sp. YR651	A0A375CBC7	Cupriavidus taiwanensis
A0A1G6UUF5	Cupriavidus sp. YR651	A0A375CEW0	Cupriavidus taiwanensis
A0A1G6UUF5	Cupriavidus sp. YR651	A0A375DNJ2	Cupriavidus taiwanensis
A0A1G6UUF5	Cupriavidus sp. YR651	A0A375F020	Cupriavidus taiwanensis
A0A1G6UUF5	Cupriavidus sp. YR651	A0A375FFB9	Cupriavidus taiwanensis
A0A1G6UUF5	Cupriavidus sp. YR651	A0A375FTI2	Cupriavidus oxalaticus
A0A1G6UUF5	Cupriavidus sp. YR651	A0A375HS62	Cupriavidus taiwanensis
A0A1G6UUF5	Cupriavidus sp. YR651	A0A375IK25	Cupriavidus taiwanensis
A0A1G6UUF5	Cupriavidus sp. YR651	F8GQ91	Cupriavidus necator N-1
A0A1G6UUF5	Cupriavidus sp. YR651	Q0K0H2	Cupriavidus necator H16
A0A1G6UUF5	Cupriavidus sp. YR651	Q46S66	Cupriavidus pinatubonensis JMP134
A0A1G6UUF5	Cupriavidus sp. YR651	R7XMP5	Cupriavidus sp. GA3-3
A0A1G6UUF5	Cupriavidus sp. YR651	U3QYJ5	Ralstonia pickettii DTP0602
A0A1G8SSZ5	Nonomuraea maritima	A0A1G8SSZ5	Nonomuraea maritima
A0A1G8SSZ5	Nonomuraea maritima	A0A1H5U9N6	Nonomuraea solani
A0A1G8SSZ5	Nonomuraea maritima	A0A1I0JY02	Nonomuraea wenchangensis
A0A1G8SSZ5	Nonomuraea maritima	A0A1M4E412	Nonomuraea gerenzanensis
A0A1G8SSZ5	Nonomuraea maritima	A0A1V0A5W3	Nonomuraea sp. ATCC 55076
A0A1G8SSZ5	Nonomuraea maritima	A0A239JI37	Streptosporangium subroseum
A0A1G8SSZ5	Nonomuraea maritima	A0A2T0N9A5	Nonomuraea fuscirosea
A0A1G8SSZ5	Nonomuraea maritima	A0A2W2DQ30	Nonomuraea sp. KC333
A0A1G8SSZ5	Nonomuraea maritima	A0A2Z3UKA7	Streptosporangium sp. 'caverna'
A0A1G8SSZ5	Nonomuraea maritima	W2F2P7	Microbispora sp. ATCC PTA-5024
A0A1H0BHH5	Afipia sp. GAS231	A0A023XHK1	Bradyrhizobium japonicum SEMIA 5079
A0A1H0BHH5	Afipia sp. GAS231	A0A090N7D6	Afipia felis
A0A1H0BHH5	Afipia sp. GAS231	A0A0D1NKY5	Bradyrhizobium elkanii
A0A1H0BHH5	Afipia sp. GAS231	A0A0D7F343	Rhodopseudomonas palustris
A0A1H0BHH5	Afipia sp. GAS231	A0A0D7NWD9	Bradyrhizobium sp. LTSP885
A0A1H0BHH5	Afipia sp. GAS231	A0A0D7PDT0	Bradyrhizobium sp. LTSP849
A0A1H0BHH5	Afipia sp. GAS231	A0A0D7Q2F7	Bradyrhizobium sp. LTSPM299
A0A1H0BHH5	Afipia sp. GAS231	A0A0E4G0H8	Bradyrhizobium diazoefficiens
A0A1H0BHH5	Afipia sp. GAS231	A0A0M3DT56	Afipia massiliensis
A0A1H0BHH5	Afipia sp. GAS231	A0A0N0KJM8	Rhodopseudomonas sp. AAP120
A0A1H0BHH5	Afipia sp. GAS231	A0A0Q5YQX9	Bradyrhizobium sp. Leaf396
A0A1H0BHH5	Afipia sp. GAS231	A0A0R3BP52	Bradyrhizobium pachyrhizi
A0A1H0BHH5	Afipia sp. GAS231	A0A0R3BV17	Bradyrhizobium yuanmingense
A0A1H0BHH5	Afipia sp. GAS231	A0A0R3E4F2	Bradyrhizobium manausense
A0A1H0BHH5	Afipia sp. GAS231	A0A0R3LE22	Bradyrhizobium jicamae
A0A1H0BHH5	Afipia sp. GAS231	A0A0R3LP56	Bradyrhizobium valentinum
A0A1H0BHH5	Afipia sp. GAS231	A0A0R3MFY1	Bradyrhizobium lablabi
A0A1H0BHH5	Afipia sp. GAS231	A0A0R3MK76	Bradyrhizobium retamae
A0A1H0BHH5	Afipia sp. GAS231	A0A0S6UT96	Bradyrhizobium sp. DOA9
A0A1H0BHH5	Afipia sp. GAS231	A0A120FQH9	Bradyrhizobium sp. BR 10303
A0A1H0BHH5	Afipia sp. GAS231	A0A120HN29	Bradyrhizobium sp. CCGE-LA001
A0A1H0BHH5	Afipia sp. GAS231	A0A150U9Q0	Bradyrhizobium sp. AT1
A0A1H0BHH5	Afipia sp. GAS231	A0A150ZJN5	Bradyrhizobium sp. DOA1
A0A1H0BHH5	Afipia sp. GAS231	A0A151FFP0	Bradyrhizobium liaoningense
A0A1H0BHH5	Afipia sp. GAS231	A0A160U525	Bradyrhizobium sp.
A0A1H0BHH5	Afipia sp. GAS231	A0A160V4L1	Bradyrhizobium sp. G22
A0A1H0BHH5	Afipia sp. GAS231	A0A164AEX4	Tardiphaga robiniae
A0A1H0BHH5	Afipia sp. GAS231	A0A176YU63	Bradyrhizobium neotropicale
A0A1H0BHH5	Afipia sp. GAS231	A0A176YUV3	Bradyrhizobium sp. BR 10245
A0A1H0BHH5	Afipia sp. GAS231	A0A1B1UDY0	Bradyrhizobium icense
A0A1H0BHH5	Afipia sp. GAS231	A0A1B9YJC8	Bradyrhizobium sp. LMTR 3
A0A1H0BHH5	Afipia sp. GAS231	A0A1B9ZBN2	Bradyrhizobium paxllaeri
A0A1H0BHH5	Afipia sp. GAS231	A0A1C3TUR0	Bradyrhizobium yuanmingense
A0A1H0BHH5	Afipia sp. GAS231	A0A1C3U7Q3	Bradyrhizobium shewense
A0A1H0BHH5	Afipia sp. GAS231	A0A1E3EGK2	Bradyrhizobium elkanii
A0A1H0BHH5	Afipia sp. GAS231	A0A1E4C5I4	Hyphomicrobium sp. SCN 65-11
A0A1H0BHH5	Afipia sp. GAS231	A0A1G8LX32	Bradyrhizobium sp. Rc2d
A0A1H0BHH5	Afipia sp. GAS231	A0A1H0BHH5	Afipia sp. GAS231
A0A1H0BHH5	Afipia sp. GAS231	A0A1H0QZK5	Afipia sp. GAS231
A0A1H0BHH5	Afipia sp. GAS231	A0A1H1TB24	Bradyrhizobium canariense
A0A1H0BHH5	Afipia sp. GAS231	A0A1H5J0L1	Bradyrhizobium erythrophlei
A0A1H0BHH5	Afipia sp. GAS231	A0A1H6NA84	Tardiphaga sp. OK245
A0A1H0BHH5	Afipia sp. GAS231	A0A1H7YUH3	Bradyrhizobium sp. OK095
A0A1H0BHH5	Afipia sp. GAS231	A0A1H8S6R4	Rhodopseudomonas pseudopalustris
A0A1H0BHH5	Afipia sp. GAS231	A0A1I3CE21	Bradyrhizobium sp. Gha
A0A1H0BHH5	Afipia sp. GAS231	A0A1I3R4G7	Bradyrhizobium sp. cf659
A0A1H0BHH5	Afipia sp. GAS231	A0A1I5MPU1	Bradyrhizobium sp. Ghvi
A0A1H0BHH5	Afipia sp. GAS231	A0A1I7LIA7	Bradyrhizobium arachidis
A0A1H0BHH5	Afipia sp. GAS231	A0A1M2ZE79	Afipia sp. 62-7
A0A1H0BHH5	Afipia sp. GAS231	A0A1M3NUA7	Rhizobiales bacterium 65-9
A0A1H0BHH5	Afipia sp. GAS231	A0A1M5MZE3	Bradyrhizobium erythrophlei
A0A1H0BHH5	Afipia sp. GAS231	A0A1M5PG97	Bradyrhizobium erythrophlei
A0A1H0BHH5	Afipia sp. GAS231	A0A1M6KKB5	Bradyrhizobium lablabi
A0A1H0BHH5	Afipia sp. GAS231	A0A1M7CLM6	Bradyrhizobium lablabi
A0A1H0BHH5	Afipia sp. GAS231	A0A1M7FE89	Bradyrhizobium lablabi
A0A1H0BHH5	Afipia sp. GAS231	A0A1M7SUE2	Bradyrhizobium erythrophlei
A0A1H0BHH5	Afipia sp. GAS231	A0A1N6HZ27	Bradyrhizobium erythrophlei
A0A1H0BHH5	Afipia sp. GAS231	A0A1N6LC51	Bradyrhizobium erythrophlei
A0A1H0BHH5	Afipia sp. GAS231	A0A1Q5RQN5	Bradyrhizobium sp. NAS96.2
A0A1H0BHH5	Afipia sp. GAS231	A0A1Q5S644	Bradyrhizobium sp. NAS80.1
A0A1H0BHH5	Afipia sp. GAS231	A0A1Q5SH04	Bradyrhizobium sp. AS23.2
A0A1H0BHH5	Afipia sp. GAS231	A0A1R1QDC7	Bradyrhizobium sp. UFLA 03-321
A0A1H0BHH5	Afipia sp. GAS231	A0A1S2SH31	Bradyrhizobium elkanii
A0A1H0BHH5	Afipia sp. GAS231	A0A1V5ET44	Bradyrhizobium sp. BR10280
A0A1H0BHH5	Afipia sp. GAS231	A0A1W9I5B3	Proteobacteria bacterium SG_bin8
A0A1H0BHH5	Afipia sp. GAS231	A0A1W9I6R5	Proteobacteria bacterium SG_bin9
A0A1H0BHH5	Afipia sp. GAS231	A0A1X3F9Z4	Bradyrhizobium canariense
A0A1H0BHH5	Afipia sp. GAS231	A0A1Y2JRQ2	Bradyrhizobium japonicum
A0A1H0BHH5	Afipia sp. GAS231	A0A1Y6KF78	Bradyrhizobium sp. ORS 285
A0A1H0BHH5	Afipia sp. GAS231	A0A239P0I7	Tardiphaga sp. OK246
A0A1H0BHH5	Afipia sp. GAS231	A0A257KL18	Bradyrhizobiaceae bacterium PARB1
A0A1H0BHH5	Afipia sp. GAS231	A0A2A6NXV8	Bradyrhizobium sp. C9
A0A1H0BHH5	Afipia sp. GAS231	A0A2A6PVB3	Bradyrhizobium sp. Y36
A0A1H0BHH5	Afipia sp. GAS231	A0A2D6Z948	Afipia sp.
A0A1H0BHH5	Afipia sp. GAS231	A0A2H9VET6	Bradyrhizobium lablabi
A0A1H0BHH5	Afipia sp. GAS231	A0A2K8YEU1	Bradyrhizobium sp. SK17
A0A1H0BHH5	Afipia sp. GAS231	A0A2M6UA26	Bradyrhizobium sp. TSA1
A0A1H0BHH5	Afipia sp. GAS231	A0A2M8RHB8	Bradyrhizobium sp. INPA54B
A0A1H0BHH5	Afipia sp. GAS231	A0A2M8ZEA9	Afipia broomeae
A0A1H0BHH5	Afipia sp. GAS231	A0A2R4GSW2	Rhodopseudomonas palustris
A0A1H0BHH5	Afipia sp. GAS231	A0A2T0PEQ2	Rhizobium tropici
A0A1H0BHH5	Afipia sp. GAS231	A0A2T2Q268	Bradyrhizobium sp. MOS003
A0A1H0BHH5	Afipia sp. GAS231	A0A2T2QN16	Bradyrhizobium sp. MOS002
A0A1H0BHH5	Afipia sp. GAS231	A0A2U0U8L6	Tardiphaga sp. OV697
A0A1H0BHH5	Afipia sp. GAS231	A0A2U3Q4X6	Bradyrhizobium sp. ORS 3257
A0A1H0BHH5	Afipia sp. GAS231	A0A2U8PRG3	Bradyrhizobium sp. 2 39S1MB
A0A1H0BHH5	Afipia sp. GAS231	A0A2U8Q9C4	Bradyrhizobium sp. 3 85S1MB
A0A1H0BHH5	Afipia sp. GAS231	A0A318TM82	Rhodopseudomonas faecalis
A0A1H0BHH5	Afipia sp. GAS231	A0A323UJ06	Rhodopseudomonas palustris
A0A1H0BHH5	Afipia sp. GAS231	A0A336JWA5	Rhodopseudomonas pentothenatexigens
A0A1H0BHH5	Afipia sp. GAS231	A0A348QNQ0	Bradyrhizobium sp.
A0A1H0BHH5	Afipia sp. GAS231	A4YXN2	Bradyrhizobium sp. ORS 278
A0A1H0BHH5	Afipia sp. GAS231	A5EGD2	Bradyrhizobium sp. BTAi1
A0A1H0BHH5	Afipia sp. GAS231	A5EGD7	Bradyrhizobium sp. BTAi1
A0A1H0BHH5	Afipia sp. GAS231	B3QBS6	Rhodopseudomonas palustris TIE-1
A0A1H0BHH5	Afipia sp. GAS231	E6VDT2	Rhodopseudomonas palustris DX-1
A0A1H0BHH5	Afipia sp. GAS231	F7QRF4	Bradyrhizobiaceae bacterium SG-6C
A0A1H0BHH5	Afipia sp. GAS231	H0SDJ2	Bradyrhizobium sp. ORS 375
A0A1H0BHH5	Afipia sp. GAS231	H0T3B7	Bradyrhizobium sp. STM 3809
A0A1H0BHH5	Afipia sp. GAS231	H0TV15	Bradyrhizobium sp. STM 3843
A0A1H0BHH5	Afipia sp. GAS231	H5Y802	Bradyrhizobium sp. WSM471
A0A1H0BHH5	Afipia sp. GAS231	I0GB99	Bradyrhizobium sp. S23321
A0A1H0BHH5	Afipia sp. GAS231	I2QC25	Bradyrhizobium sp. WSM1253
A0A1H0BHH5	Afipia sp. GAS231	J3I3G8	Bradyrhizobium sp. YR681
A0A1H0BHH5	Afipia sp. GAS231	K8P004	Afipia clevelandensis ATCC 49720
A0A1H0BHH5	Afipia sp. GAS231	M4Z6Q0	Bradyrhizobium oligotrophicum S58
A0A1H0BHH5	Afipia sp. GAS231	Q07Q82	Rhodopseudomonas palustris BisA53
A0A1H0BHH5	Afipia sp. GAS231	Q217M3	Rhodopseudomonas palustris BisB18
A0A1H0BHH5	Afipia sp. GAS231	Q2IUI7	Rhodopseudomonas palustris HaA2
A0A1H0BHH5	Afipia sp. GAS231	Q6N8F8	Rhodopseudomonas palustris CGA009
A0A1H0LV42	Alloactinosynnema album	A0A1H0LV42	Alloactinosynnema album
A0A1H0QNQ4	Ralstonia sp. 25mfcol4.1	A0A1H0QNQ4	Ralstonia sp. 25mfcol4.1
A0A1H0QNQ4	Ralstonia sp. 25mfcol4.1	A0A1H7EPM7	Paraburkholderia diazotrophica
A0A1H0QNQ4	Ralstonia sp. 25mfcol4.1	A0A1I1QTW4	Cupriavidus sp. OV038
A0A1H0QNQ4	Ralstonia sp. 25mfcol4.1	A0A1K0JYY0	Cupriavidus necator
A0A1H0QNQ4	Ralstonia sp. 25mfcol4.1	A0A1U9UZY4	Cupriavidus sp. HPC(L)
A0A1H0QNQ4	Ralstonia sp. 25mfcol4.1	A0A1X7DIV1	Paraburkholderia caryophylli
A0A1H0QNQ4	Ralstonia sp. 25mfcol4.1	A0A2N5CA40	Cupriavidus pauculus
A0A1H0QNQ4	Ralstonia sp. 25mfcol4.1	A0A2N7X0R2	Paraburkholderia symbiotica
A0A1H0QNQ4	Ralstonia sp. 25mfcol4.1	A0A2T3XU09	Paraburkholderia symbiotica
A0A1H0QNQ4	Ralstonia sp. 25mfcol4.1	A0A2W7PRB1	Cupriavidus alkaliphilus
A0A1H0QNQ4	Ralstonia sp. 25mfcol4.1	A0A316EVN6	Cupriavidus plantarum
A0A1H0QNQ4	Ralstonia sp. 25mfcol4.1	A0A367PI88	Cupriavidus necator
A0A1H0QNQ4	Ralstonia sp. 25mfcol4.1	A0A370NNH3	Cupriavidus sp. S23
A0A1H0QNQ4	Ralstonia sp. 25mfcol4.1	A0A375CBG9	Cupriavidus taiwanensis
A0A1H0QNQ4	Ralstonia sp. 25mfcol4.1	A0A375CEV8	Cupriavidus taiwanensis
A0A1H0QNQ4	Ralstonia sp. 25mfcol4.1	A0A375D9Q1	Cupriavidus taiwanensis
A0A1H0QNQ4	Ralstonia sp. 25mfcol4.1	A0A375DKE3	Cupriavidus taiwanensis
A0A1H0QNQ4	Ralstonia sp. 25mfcol4.1	A0A375E9P5	Cupriavidus taiwanensis
A0A1H0QNQ4	Ralstonia sp. 25mfcol4.1	A0A375EVJ9	Cupriavidus taiwanensis
A0A1H0QNQ4	Ralstonia sp. 25mfcol4.1	A0A375FEH4	Cupriavidus taiwanensis
A0A1H0QNQ4	Ralstonia sp. 25mfcol4.1	A0A375GKB3	Cupriavidus oxalaticus
A0A1H0QNQ4	Ralstonia sp. 25mfcol4.1	A0A375HLP7	Cupriavidus taiwanensis
A0A1H0QNQ4	Ralstonia sp. 25mfcol4.1	A0A375HS72	Cupriavidus taiwanensis
A0A1H0QNQ4	Ralstonia sp. 25mfcol4.1	B2JM66	Paraburkholderia phymatum STM815
A0A1H0QNQ4	Ralstonia sp. 25mfcol4.1	Q0K0H8	Cupriavidus necator H16
A0A1H0QNQ4	Ralstonia sp. 25mfcol4.1	Q46S72	Cupriavidus pinatubonensis JMP134
A0A1H0QNQ4	Ralstonia sp. 25mfcol4.1	U3QYI9	Ralstonia pickettii DTP0602
A0A1H0RJM4	Phyllobacterium sp. OV277	A0A1H0RJM4	Phyllobacterium sp. OV277
A0A1H0RJM4	Phyllobacterium sp. OV277	A0A1N7PZD9	Paracoccus saliphilus
A0A1H0RJM4	Phyllobacterium sp. OV277	A0A316C222	Pseudaminobacter salicylatoxidans
A0A1H0RJM4	Phyllobacterium sp. OV277	A0A368YHP9	Phyllobacterium bourgognense
A0A1H1F2Y8	Thermostaphylospora chromogena	A0A1G7YR64	Nonomuraea jiangxiensis
A0A1H1F2Y8	Thermostaphylospora chromogena	A0A1H1F2Y8	Thermostaphylospora chromogena
A0A1H1F2Y8	Thermostaphylospora chromogena	A0A367F5H1	Sphaerisporangium album
A0A1H1JQ15	Rhizobiales bacterium GAS113	A0A1H1JQ15	Rhizobiales bacterium GAS113
A0A1H5W0F8	Saccharopolyspora hirsuta	A0A1H5W0F8	Saccharopolyspora hirsuta
A0A1H5W0F8	Saccharopolyspora hirsuta	A0A1I4RTY8	Saccharopolyspora antimicrobica
A0A1H5W0F8	Saccharopolyspora hirsuta	A0A1I6SN29	Saccharopolyspora flava
A0A1H6CNH6	Streptomyces yanglinensis	A0A1H0SPY7	Streptomyces guanduensis
A0A1H6CNH6	Streptomyces yanglinensis	A0A1H6CNH6	Streptomyces yanglinensis
A0A1H6CNH6	Streptomyces yanglinensis	A0A2M9ATX7	Streptomyces sp. CNZ306
A0A1H8HDX3	Paracoccus alcaliphilus	A0A1H8HDX3	Paracoccus alcaliphilus
A0A1H8HDX3	Paracoccus alcaliphilus	A8TPV6	alpha proteobacterium BAL199
A0A1H8XN81	Rhodospirillales bacterium URHD0017	A0A1H8XN81	Rhodospirillales bacterium URHD0017
A0A1I4UD35	Variovorax sp. OV329	A0A0A1FG30	Collimonas arenae
A0A1I4UD35	Variovorax sp. OV329	A0A0D0LTH5	Variovorax paradoxus
A0A1I4UD35	Variovorax sp. OV329	A0A0H2M5R5	Variovorax paradoxus
A0A1I4UD35	Variovorax sp. OV329	A0A0P9A4R0	Variovorax paradoxus
A0A1I4UD35	Variovorax sp. OV329	A0A0Q6MXU3	Variovorax sp. Root318D1
A0A1I4UD35	Variovorax sp. OV329	A0A0Q7BSU9	Variovorax sp. Root411
A0A1I4UD35	Variovorax sp. OV329	A0A0Q7GYE3	Variovorax sp. Root434
A0A1I4UD35	Variovorax sp. OV329	A0A109CET1	Variovorax sp. WDL1
A0A1I4UD35	Variovorax sp. OV329	A0A127PC12	Collimonas fungivorans
A0A1I4UD35	Variovorax sp. OV329	A0A127QY44	Collimonas pratensis
A0A1I4UD35	Variovorax sp. OV329	A0A1F4IAP7	Burkholderiales bacterium RIFCSPHIGHO2_12_FULL_61_
A0A1I4UD35	Variovorax sp. OV329	A0A1G6XCQ3	Variovorax sp. CF079
A0A1I4UD35	Variovorax sp. OV329	A0A1G8J0S2	Variovorax sp. OV700
A0A1I4UD35	Variovorax sp. OV329	A0A1H7W2K3	Variovorax sp. YR750
A0A1I4UD35	Variovorax sp. OV329	A0A1I0V5K8	Collimonas sp. OK607
A0A1I4UD35	Variovorax sp. OV329	A0A1I1DP48	Collimonas sp. OK412
A0A1I4UD35	Variovorax sp. OV329	A0A1I3IFP6	Collimonas sp. OK307
A0A1I4UD35	Variovorax sp. OV329	A0A1I4UD35	Variovorax sp. OV329
A0A1I4UD35	Variovorax sp. OV329	A0A1I5M7M2	Variovorax sp. PDC80
A0A1I4UD35	Variovorax sp. OV329	A0A1I5XHX1	Variovorax sp. 770b2
A0A1I4UD35	Variovorax sp. OV329	A0A1I7GWT5	Polaromonas sp. YR568
A0A1I4UD35	Variovorax sp. OV329	A0A1S8FHZ0	Polaromonas sp. A23
A0A1I4UD35	Variovorax sp. OV329	A0A244EH02	Variovorax sp. JS1663
A0A1I4UD35	Variovorax sp. OV329	A0A286AQG5	Variovorax sp. YR752
A0A1I4UD35	Variovorax sp. OV329	A0A2A9KMP8	Collimonas sp. PA-H2
A0A1I4UD35	Variovorax sp. OV329	A0A2E9C0F4	Variovorax sp.
A0A1I4UD35	Variovorax sp. OV329	A0A2N2RQ07	Betaproteobacteria bacterium HGW-Betaproteobacteri
A0A1I4UD35	Variovorax sp. OV329	A0A2P8KF57	Variovorax sp. WS11
A0A1I4UD35	Variovorax sp. OV329	C5CK44	Variovorax paradoxus S110
A0A1I4UD35	Variovorax sp. OV329	E6V5A0	Variovorax paradoxus EPS
A0A1I4UD35	Variovorax sp. OV329	G0ABP4	Collimonas fungivorans Ter331
A0A1I4UD35	Variovorax sp. OV329	H5WKJ9	Burkholderiales bacterium JOSHI_001
A0A1I4UD35	Variovorax sp. OV329	J2T7D9	Variovorax sp. CF313
A0A1I4UD35	Variovorax sp. OV329	Q129S3	Polaromonas sp. JS666
A0A1I4UD35	Variovorax sp. OV329	T1XHW6	Variovorax paradoxus B4
A0A1I5DJY9	Pseudonocardia ammonioxydans	A0A1I5DJY9	Pseudonocardia ammonioxydans
A0A1I5DJY9	Pseudonocardia ammonioxydans	A0A263DZP4	Pseudonocardia sp. MH-G8
A0A1Q3V723	Rhodospirillales bacterium 69-11	A0A1Q3V723	Rhodospirillales bacterium 69-11
A0A1Q3W6S4	Afipia sp. 64-13	A0A1Q3W6S4	Afipia sp. 64-13
A0A1Q3W6S4	Afipia sp. 64-13	A0A380WB92	Afipia felis
A0A1Q3W6S4	Afipia sp. 64-13	B6JE29	Oligotropha carboxidovorans OM5
A0A1Q4BQT1	Rhizobiales bacterium 62-47	A0A0Q6ZHU8	Afipia sp. Root123D2
A0A1Q4BQT1	Rhizobiales bacterium 62-47	A0A1Q4BQT1	Rhizobiales bacterium 62-47
A0A1Q6U8Z5	Azospirillum sp. 51_20	A0A1Q6U8Z5	Azospirillum sp. 51_20
A0A1Q6WIA3	Gammaproteobacteria bacterium 13_2_20CM_66_19	A0A1Q6WIA3	Gammaproteobacteria bacterium 13_2_20CM_66_19
A0A1Q7MV97	Acidobacteria bacterium 13_1_40CM_3_56_11	A0A1Q7FYS6	Acidobacteria bacterium 13_1_40CM_56_16
A0A1Q7MV97	Acidobacteria bacterium 13_1_40CM_3_56_11	A0A1Q7MV97	Acidobacteria bacterium 13_1_40CM_3_56_11
A0A1Q7MV97	Acidobacteria bacterium 13_1_40CM_3_56_11	A0A2V8J8X3	Acidobacteria bacterium
A0A1Q7MV97	Acidobacteria bacterium 13_1_40CM_3_56_11	A0A2V8JNT0	Acidobacteria bacterium
A0A1Q7MV97	Acidobacteria bacterium 13_1_40CM_3_56_11	A0A2V8KVJ7	Acidobacteria bacterium
A0A1S2N5F3	Massilia timonae	A0A1S2N5F3	Massilia timonae
A0A1V1UCN5	Roseovarius sp. A-2	A0A0A0HSD0	Roseovarius mucosus DSM 17069
A0A1V1UCN5	Roseovarius sp. A-2	A0A0F2S1E8	Roseovarius sp. BRH_c41
A0A1V1UCN5	Roseovarius sp. A-2	A0A1I0YQM6	Poseidonocella pacifica
A0A1V1UCN5	Roseovarius sp. A-2	A0A1I2AGE5	Roseivivax sediminis
A0A1V1UCN5	Roseovarius sp. A-2	A0A1I5ESC3	Roseovarius lutimaris
A0A1V1UCN5	Roseovarius sp. A-2	A0A1I6EKE9	Poseidonocella sedimentorum
A0A1V1UCN5	Roseovarius sp. A-2	A0A1M7AKK5	Roseovarius marisflavi
A0A1V1UCN5	Roseovarius sp. A-2	A0A1U7DK10	Brevirhabdus pacifica
A0A1V1UCN5	Roseovarius sp. A-2	A0A1V0RL55	Roseovarius mucosus
A0A1V1UCN5	Roseovarius sp. A-2	A0A1V1UCN5	Roseovarius sp. A-2
A0A1V1UCN5	Roseovarius sp. A-2	A0A225NS11	Marinibacterium profundimaris
A0A1V1UCN5	Roseovarius sp. A-2	A0A2D5J9H1	Rhodobacteraceae bacterium
A0A1V1UCN5	Roseovarius sp. A-2	A0A2D9AEH9	Roseovarius sp.
A0A1V1UCN5	Roseovarius sp. A-2	A0A2E3PE33	Rhodobacteraceae bacterium
A0A1V1UCN5	Roseovarius sp. A-2	A0A2N3ETT0	Alphaproteobacteria bacterium HGW-Alphaproteobacte
A0A1V1UCN5	Roseovarius sp. A-2	A0A2V5FVX4	Rhodobacteraceae bacterium
A0A1V1UCN5	Roseovarius sp. A-2	A0A316G9V8	Silicimonas algicola
A0A1V2PJ52	Kribbella sp. ALI-6-A	A0A1V2PJ52	Kribbella sp. ALI-6-A
A0A1V2PJ52	Kribbella sp. ALI-6-A	D2PSA0	Kribbella flavida DSM 17836
A0A1V8NT80	Citrobacter braakii	A0A1V8NT80	Citrobacter braakii
A0A1V8NT80	Citrobacter braakii	A0A1X2RQ90	Salmonella enterica subsp. enterica serovar Rough
A0A1V8NT80	Citrobacter braakii	A0A1Z3Q6Q8	Salmonella enterica subsp. enterica serovar India
A0A1X0AWU7	Mycobacterium aquaticum	A0A1X0AWU7	Mycobacterium aquaticum
A0A1X0AWU7	Mycobacterium aquaticum	A0A1X2AYA3	Mycobacterium parmense
A0A1X0ISQ1	Mycolicibacterium rhodesiae	A0A1U9PLV3	Mycolicibacterium litorale
A0A1X0ISQ1	Mycolicibacterium rhodesiae	A0A1X0ISQ1	Mycolicibacterium rhodesiae
A0A1X0ISQ1	Mycolicibacterium rhodesiae	A0A2C9SSA8	Mycobacterium sp. shizuoka-1
A0A1X0ISQ1	Mycolicibacterium rhodesiae	A0A2T5WMY8	Mycobacterium sp. YR782
A0A1X0ISQ1	Mycolicibacterium rhodesiae	G4I077	Mycolicibacterium rhodesiae JS60
A0A1X0T5P4	Aurantimonas sp. 22II-16-19i	A0A1X0T5P4	Aurantimonas sp. 22II-16-19i
A0A1X0T5P4	Aurantimonas sp. 22II-16-19i	A0A2E1HBF2	Fulvimarina sp.
A0A1X7DIT8	Paraburkholderia caryophylli	A0A1X7DIT8	Paraburkholderia caryophylli
A0A1X7DIT8	Paraburkholderia caryophylli	A0A2N7X160	Paraburkholderia symbiotica
A0A1X7DIT8	Paraburkholderia caryophylli	A0A2T3XTU9	Paraburkholderia symbiotica
A0A1Z8LJF4	Rhodospirillaceae bacterium TMED8	A0A1Z8LJF4	Rhodospirillaceae bacterium TMED8
A0A1Z8LJF4	Rhodospirillaceae bacterium TMED8	A0A2E6X412	Magnetovibrio sp.
A0A1Z8S453	Candidatus Endolissoclinum sp. TMED37	A0A1Z8S453	Candidatus Endolissoclinum sp. TMED37
A0A1Z8S453	Candidatus Endolissoclinum sp. TMED37	A0A1Z8V3K6	Candidatus Endolissoclinum sp. TMED55
A0A1Z8S453	Candidatus Endolissoclinum sp. TMED37	A0A2D6SHJ3	Rhodobacteraceae bacterium
A0A1Z8S453	Candidatus Endolissoclinum sp. TMED37	A0A2D9MTT8	Rhodospirillaceae bacterium
A0A1Z8S453	Candidatus Endolissoclinum sp. TMED37	A0A2D9YDQ7	Rhodospirillaceae bacterium
A0A1Z8S453	Candidatus Endolissoclinum sp. TMED37	A0A2E0HAC0	Rhodospirillaceae bacterium
A0A1Z8S453	Candidatus Endolissoclinum sp. TMED37	A0A2E2YJ24	Rhodospirillaceae bacterium
A0A1Z8S453	Candidatus Endolissoclinum sp. TMED37	A0A2E3KAF8	Rhodospirillaceae bacterium
A0A1Z8S453	Candidatus Endolissoclinum sp. TMED37	A0A2E5L6Z7	Rhodospirillaceae bacterium
A0A1Z8S453	Candidatus Endolissoclinum sp. TMED37	A0A2E7V5G6	Rhodospirillaceae bacterium
A0A1Z8S453	Candidatus Endolissoclinum sp. TMED37	A0A2E9UXA6	Rhodospirillaceae bacterium
A0A1Z8S453	Candidatus Endolissoclinum sp. TMED37	E0XS60	uncultured alpha proteobacterium HF0070_14E07
A0A1Z8TKP8	Proteobacteria bacterium TMED51	A0A1Z8TKP8	Proteobacteria bacterium TMED51
A0A1Z8TKP8	Proteobacteria bacterium TMED51	A0A1Z8TMQ5	Proteobacteria bacterium TMED51
A0A1Z8TKP8	Proteobacteria bacterium TMED51	A0A1Z8VIN8	Proteobacteria bacterium TMED61
A0A1Z8TKP8	Proteobacteria bacterium TMED51	A0A2D6CRX3	Acidiferrobacteraceae bacterium
A0A1Z8TKP8	Proteobacteria bacterium TMED51	A0A2D7VK69	Acidiferrobacter sp.
A0A1Z8TKP8	Proteobacteria bacterium TMED51	A0A2E4IL64	Acidiferrobacteraceae bacterium
A0A1Z8TKP8	Proteobacteria bacterium TMED51	A0A2E5KSF3	Alphaproteobacteria bacterium
A0A1Z8TKP8	Proteobacteria bacterium TMED51	A0A2E5QB75	Proteobacteria bacterium
A0A1Z8TKP8	Proteobacteria bacterium TMED51	A0A2E5QD08	Proteobacteria bacterium
A0A1Z8TKP8	Proteobacteria bacterium TMED51	A0A2E8CJ77	Acidiferrobacteraceae bacterium
A0A1Z8TKP8	Proteobacteria bacterium TMED51	A0A2E8MI31	Acidiferrobacteraceae bacterium
A0A1Z8TKP8	Proteobacteria bacterium TMED51	A0A2E8QM38	Acidiferrobacter sp.
A0A1Z8TKP8	Proteobacteria bacterium TMED51	A0A381URI3	marine metagenome
A0A1Z8UZK2	Candidatus Puniceispirillum sp. TMED52	A0A1Z8UZK2	Candidatus Puniceispirillum sp. TMED52
A0A1Z8UZK2	Candidatus Puniceispirillum sp. TMED52	A0A2U2CHX2	Maritimibacter sp. 55A14
A0A1Z9G8I6	Alphaproteobacteria bacterium TMED150	A0A1Z8NJD7	Rhizobiales bacterium TMED25
A0A1Z9G8I6	Alphaproteobacteria bacterium TMED150	A0A1Z8PCK1	Rhizobiales bacterium TMED28
A0A1Z9G8I6	Alphaproteobacteria bacterium TMED150	A0A1Z9G8I6	Alphaproteobacteria bacterium TMED150
A0A1Z9G8I6	Alphaproteobacteria bacterium TMED150	A0A2D9J8U3	Rhodobiaceae bacterium
A0A1Z9G8I6	Alphaproteobacteria bacterium TMED150	A0A2E0G9Z7	Rhizobiales bacterium
A0A1Z9G8I6	Alphaproteobacteria bacterium TMED150	A0A2E0T6U7	Rhodobiaceae bacterium
A0A1Z9G8I6	Alphaproteobacteria bacterium TMED150	A0A2E1QPY5	Rhodobiaceae bacterium
A0A1Z9G8I6	Alphaproteobacteria bacterium TMED150	A0A2E5H9K8	Rhodobiaceae bacterium
A0A1Z9G8I6	Alphaproteobacteria bacterium TMED150	A0A2E9B7F6	Rhodobiaceae bacterium
A0A1Z9G8I6	Alphaproteobacteria bacterium TMED150	A0A2E9U9B5	Rhodobiaceae bacterium
A0A208XXE9	Pigmentiphaga sp. NML080357	A0A208XXE9	Pigmentiphaga sp. NML080357
A0A222VUA1	Prauserella marina	A0A222VUA1	Prauserella marina
A0A222VUA1	Prauserella marina	A0A2T0LRZ0	Prauserella shujinwangii
A0A222VUA1	Prauserella marina	A0A2V4AI29	Prauserella muralis
A0A222VUA1	Prauserella marina	A0A318M5K4	Prauserella sp. YIM 121212
A0A222VUA1	Prauserella marina	A0A365ZPS2	Prauserella sp. PE36
A0A222VUA1	Prauserella marina	H5X0V7	Saccharomonospora marina XMU15
A0A239KMS3	Streptomyces glauciniger	A0A239KMS3	Streptomyces glauciniger
A0A239KMS3	Streptomyces glauciniger	A0A239NUS9	Streptomyces glauciniger
A0A257KV76	Bradyrhizobiaceae bacterium PARB1	A0A257KV76	Bradyrhizobiaceae bacterium PARB1
A0A257ZNF4	Rhizobiales bacterium 12-68-15	A0A257ZNF4	Rhizobiales bacterium 12-68-15
A0A257ZNF4	Rhizobiales bacterium 12-68-15	A0A258IMB4	Rhizobiales bacterium 32-66-11
A0A257ZNF4	Rhizobiales bacterium 12-68-15	A0A258M016	Rhizobiales bacterium 35-68-8
A0A257ZNF4	Rhizobiales bacterium 12-68-15	A0A258S4K4	Rhizobiales bacterium 35-66-30
A0A257ZNF4	Rhizobiales bacterium 12-68-15	A0A259CB82	Rhizobiales bacterium 17-65-6
A0A269ZMZ9	Lactobacillus kefiranofaciens	A0A0R1HAW1	Lactobacillus amylovorus DSM 20531
A0A269ZMZ9	Lactobacillus kefiranofaciens	A0A0R1PNQ4	Lactobacillus kefiranofaciens subsp. kefirgranum D
A0A269ZMZ9	Lactobacillus kefiranofaciens	A0A269ZMZ9	Lactobacillus kefiranofaciens
A0A269ZMZ9	Lactobacillus kefiranofaciens	C7XLI6	Lactobacillus crispatus 125-2-CHN
A0A269ZMZ9	Lactobacillus kefiranofaciens	D0DJQ6	Lactobacillus crispatus MV-3A-US
A0A2A2EHW6	Bifidobacterium criceti	A0A087ADU5	Bifidobacterium choerinum
A0A2A2EHW6	Bifidobacterium criceti	A0A087B567	Bifidobacterium cuniculi
A0A2A2EHW6	Bifidobacterium criceti	A0A0A7I974	Bifidobacterium pseudolongum PV8-2
A0A2A2EHW6	Bifidobacterium criceti	A0A0L7BLA3	Bifidobacterium animalis subsp. animalis MCC 0483
A0A2A2EHW6	Bifidobacterium criceti	A0A248X7K1	Bifidobacterium pseudolongum
A0A2A2EHW6	Bifidobacterium criceti	A0A2A2EHW6	Bifidobacterium criceti
A0A2A2EHW6	Bifidobacterium criceti	A0A2A2EJG1	Bifidobacterium italicum
A0A2A2EHW6	Bifidobacterium criceti	A0A2D3D410	Bifidobacterium choerinum
A0A2A2EHW6	Bifidobacterium criceti	A0A2N3QI38	Bifidobacterium pseudolongum subsp. globosum
A0A2A2EHW6	Bifidobacterium criceti	A0A2N3QZ10	Bifidobacterium pseudolongum subsp. globosum
A0A2A2EHW6	Bifidobacterium criceti	A0A2N3R094	Bifidobacterium pseudolongum subsp. pseudolongum
A0A2A2EHW6	Bifidobacterium criceti	A0A2N5IVX1	Bifidobacterium anseris
A0A2A2EHW6	Bifidobacterium criceti	B8DWT9	Bifidobacterium animalis subsp. lactis AD011
A0A2A2YV70	Streptomyces sp. SA15	A0A2A2YV70	Streptomyces sp. SA15
A0A2A2YVB9	Streptomyces sp. SA15	A0A2A2YVB9	Streptomyces sp. SA15
A0A2A2YVB9	Streptomyces sp. SA15	A0A2N0I5K4	Streptomyces sp. 69
A0A2A4LLP3	Rhizobiales bacterium	A0A0T5NN72	Roseovarius atlanticus
A0A2A4LLP3	Rhizobiales bacterium	A0A2A4LLP3	Rhizobiales bacterium
A0A2A4LLP3	Rhizobiales bacterium	A0A2A4R8R3	Rhizobiales bacterium
A0A2A4LLP3	Rhizobiales bacterium	A0A2E0BMG9	Rhodobacteraceae bacterium
A0A2A7R4V4	Lactobacillus sp. UMNPBX3	A0A073JPH8	Lactobacillus reuteri
A0A2A7R4V4	Lactobacillus sp. UMNPBX3	A0A081KVM2	Lactobacillus reuteri
A0A2A7R4V4	Lactobacillus sp. UMNPBX3	A0A0S4NNV8	Lactobacillus reuteri ATCC 53608
A0A2A7R4V4	Lactobacillus sp. UMNPBX3	A0A1C1ZGW1	Lactobacillus reuteri
A0A2A7R4V4	Lactobacillus sp. UMNPBX3	A0A1C2GE49	Lactobacillus reuteri
A0A2A7R4V4	Lactobacillus sp. UMNPBX3	A0A1V4FMR6	Lactobacillus reuteri
A0A2A7R4V4	Lactobacillus sp. UMNPBX3	A0A1X8V7N7	Lactobacillus reuteri
A0A2A7R4V4	Lactobacillus sp. UMNPBX3	A0A256SKD9	Lactobacillus reuteri
A0A2A7R4V4	Lactobacillus sp. UMNPBX3	A0A256VB25	Lactobacillus reuteri
A0A2A7R4V4	Lactobacillus sp. UMNPBX3	A0A256VIH0	Lactobacillus reuteri
A0A2A7R4V4	Lactobacillus sp. UMNPBX3	A0A2A7R4V4	Lactobacillus sp. UMNPBX3
A0A2A7R4V4	Lactobacillus sp. UMNPBX3	A0A2T5Q6N5	Lactobacillus reuteri
A0A2A7R4V4	Lactobacillus sp. UMNPBX3	A0A317GG30	Lactobacillus reuteri
A0A2A7R4V4	Lactobacillus sp. UMNPBX3	A0A347TB43	Lactobacillus reuteri
A0A2A7R4V4	Lactobacillus sp. UMNPBX3	R9WHI8	Lactobacillus reuteri I5007
A0A2D1K061	Dickeya dianthicola RNS04.9	A0A2D1K061	Dickeya dianthicola RNS04.9
A0A2D1K061	Dickeya dianthicola RNS04.9	A0A2K8QGF3	Dickeya fangzhongdai
A0A2D1K061	Dickeya dianthicola RNS04.9	A0A2K8W0B8	Dickeya solani RNS 08.23.3.1.A
A0A2D1K061	Dickeya dianthicola RNS04.9	A0A2K9Q9J2	Dickeya zeae
A0A2D1K061	Dickeya dianthicola RNS04.9	A0A318FPX9	Erwinia sp. AG740
A0A2D1K061	Dickeya dianthicola RNS04.9	C6C977	Dickeya paradisiaca Ech703
A0A2D1K061	Dickeya dianthicola RNS04.9	E0SND1	Dickeya dadantii 3937
A0A2D5VAI7	Deltaproteobacteria bacterium	A0A2D5VAI7	Deltaproteobacteria bacterium
A0A2D5VAI7	Deltaproteobacteria bacterium	A0A381YL84	marine metagenome
A0A2D6JUC6	Rhodospirillaceae bacterium	A0A2D6JUC6	Rhodospirillaceae bacterium
A0A2D6QZS2	Acidobacteria bacterium	A0A2D6QZS2	Acidobacteria bacterium
A0A2D6QZS2	Acidobacteria bacterium	A0A2E9NPH7	Acidobacteria bacterium
A0A2D6ZRL4	Pelagibacteraceae bacterium	A0A1Z9S7K6	Pelagibacteraceae bacterium TMED259
A0A2D6ZRL4	Pelagibacteraceae bacterium	A0A2D6ZRL4	Pelagibacteraceae bacterium
A0A2D6ZRL4	Pelagibacteraceae bacterium	A0A2E1PET1	Pelagibacteraceae bacterium
A0A2D6ZRL4	Pelagibacteraceae bacterium	J9Z2F1	alpha proteobacterium HIMB59
A0A2D7FAQ3	Filomicrobium sp.	A0A2D7FAQ3	Filomicrobium sp.
A0A2D8KVY1	Acidiferrobacteraceae bacterium	A0A2D8KVY1	Acidiferrobacteraceae bacterium
A0A2D8KVY1	Acidiferrobacteraceae bacterium	A0A2E4SLF5	Acidiferrobacteraceae bacterium
A0A2D9AA15	Gemmatimonadetes bacterium	A0A2D9AA15	Gemmatimonadetes bacterium
A0A2D9AA15	Gemmatimonadetes bacterium	A0A2E1WRI1	Gemmatimonadetes bacterium
A0A2D9AA15	Gemmatimonadetes bacterium	A0A2E9X231	Gemmatimonadetes bacterium
A0A2D9AA15	Gemmatimonadetes bacterium	A0A349JUZ5	Gemmatimonadetes bacterium
A0A2D9AA15	Gemmatimonadetes bacterium	A0A350Q7C7	Gemmatimonadetes bacterium
A0A2D9F5F8	Rhodospirillaceae bacterium	A0A2A4PJQ2	Rhodospirillaceae bacterium
A0A2D9F5F8	Rhodospirillaceae bacterium	A0A2D8Z058	Magnetovibrio sp.
A0A2D9F5F8	Rhodospirillaceae bacterium	A0A2D9F5F8	Rhodospirillaceae bacterium
A0A2D9F5F8	Rhodospirillaceae bacterium	A0A2E3KYN6	Magnetovibrio sp.
A0A2D9F5F8	Rhodospirillaceae bacterium	A0A2E3P845	Magnetovibrio sp.
A0A2D9F5F8	Rhodospirillaceae bacterium	A0A2E8U598	Magnetovibrio sp.
A0A2D9F5F8	Rhodospirillaceae bacterium	A0A2M7GTD1	Rhodospirillales bacterium CG15_BIG_FIL_POST_REV_8
A0A2D9F5F8	Rhodospirillaceae bacterium	A0A357V913	Rhodospirillaceae bacterium
A0A2D9M243	Woeseiaceae bacterium	A0A2D9M243	Woeseiaceae bacterium
A0A2D9M243	Woeseiaceae bacterium	A0A2E6NHS6	Acidobacteria bacterium
A0A2D9M243	Woeseiaceae bacterium	A0A356IE10	Acidobacteria bacterium
A0A2E1W1L9	Acidobacteria bacterium	A0A2E1W1L9	Acidobacteria bacterium
A0A2E1W1L9	Acidobacteria bacterium	A0A2E4FL30	Acidobacteria bacterium
A0A2E1W1L9	Acidobacteria bacterium	A0A2E6ZQZ7	Acidobacteria bacterium
A0A2E1W1L9	Acidobacteria bacterium	A0A2E7BIR9	Acidobacteria bacterium
A0A2E1W1L9	Acidobacteria bacterium	A0A2E8EAS6	Acidobacteria bacterium
A0A2E3K714	Rhodospirillaceae bacterium	A0A2E3K714	Rhodospirillaceae bacterium
A0A2E3YJT3	Gammaproteobacteria bacterium	A0A2E3YJT3	Gammaproteobacteria bacterium
A0A2E3YJT3	Gammaproteobacteria bacterium	A0A2E5NJE2	Rhodospirillaceae bacterium
A0A2E3ZLW5	Rhodospirillaceae bacterium	A0A2E3ZLW5	Rhodospirillaceae bacterium
A0A2E3ZLW5	Rhodospirillaceae bacterium	A0A2E5V2J0	Rhodospirillaceae bacterium
A0A2E3ZLW5	Rhodospirillaceae bacterium	A0A2E6GQX6	Rhodospirillaceae bacterium
A0A2E3ZLW5	Rhodospirillaceae bacterium	A0A2E7QUZ0	Rhodospirillaceae bacterium
A0A2E4H0P2	Rhodospirillaceae bacterium	A0A2E4H0P2	Rhodospirillaceae bacterium
A0A2E4H0P2	Rhodospirillaceae bacterium	A0A2E4XRH4	Rhodospirillaceae bacterium
A0A2E4H0P2	Rhodospirillaceae bacterium	A0A2E5PP89	Rhodospirillaceae bacterium
A0A2E4H0P2	Rhodospirillaceae bacterium	A0A2E7V3A0	Rickettsiales bacterium
A0A2E4H0P2	Rhodospirillaceae bacterium	A0A2S6TVA6	Alphaproteobacteria bacterium MarineAlpha4_Bin2
A0A2E4HVZ7	Acidobacteria bacterium	A0A2E4HVZ7	Acidobacteria bacterium
A0A2E4HVZ7	Acidobacteria bacterium	A0A2E7AQA7	Acidobacteria bacterium
A0A2E4HVZ7	Acidobacteria bacterium	A0A2E7NCH0	Acidobacteria bacterium
A0A2E4HVZ7	Acidobacteria bacterium	A0A2V8LQR0	Acidobacteria bacterium
A0A2E4HVZ7	Acidobacteria bacterium	A0A381SDT9	marine metagenome
A0A2E4I257	Gemmatimonadetes bacterium	A0A2E4I257	Gemmatimonadetes bacterium
A0A2E4I257	Gemmatimonadetes bacterium	A0A2E5GXW7	Gemmatimonadetes bacterium
A0A2E4I257	Gemmatimonadetes bacterium	A0A2E5UMV3	Gemmatimonadetes bacterium
A0A2E4JDL6	Acidobacteria bacterium	A0A2E4JDL6	Acidobacteria bacterium
A0A2E4JDL6	Acidobacteria bacterium	A0A2E4KR97	Acidobacteria bacterium
A0A2E4JDL6	Acidobacteria bacterium	A0A2E5H384	Acidobacteria bacterium
A0A2E4JDL6	Acidobacteria bacterium	A0A2E9VAI2	Acidobacteria bacterium
A0A2E4JDL6	Acidobacteria bacterium	A0A2E9VC51	Acidobacteria bacterium
A0A2E4JDL6	Acidobacteria bacterium	A0A381VSR5	marine metagenome
A0A2E6P595	Acidiferrobacteraceae bacterium	A0A2E6P595	Acidiferrobacteraceae bacterium
A0A2E6P595	Acidiferrobacteraceae bacterium	A0A2E7T7J4	Acidiferrobacteraceae bacterium
A0A2E6P595	Acidiferrobacteraceae bacterium	A0A381VQZ9	marine metagenome
A0A2E6W317	Magnetovibrio sp.	A0A2E6W317	Magnetovibrio sp.
A0A2E7U2A0	Gemmatimonadetes bacterium	A0A2E7U2A0	Gemmatimonadetes bacterium
A0A2E7U2A0	Gemmatimonadetes bacterium	A0A352VNA1	Gemmatimonadetes bacterium
A0A2E7U2A0	Gemmatimonadetes bacterium	A0A381NFW4	marine metagenome
A0A2E9EBD0	Gammaproteobacteria bacterium	A0A2E9EBD0	Gammaproteobacteria bacterium
A0A2G8T3X3	Massilia psychrophila	A0A060DUT7	Azospirillum brasilense
A0A2G8T3X3	Massilia psychrophila	A0A1S2NCI2	Massilia timonae
A0A2G8T3X3	Massilia psychrophila	A0A235H4J4	Azospirillum brasilense
A0A2G8T3X3	Massilia psychrophila	A0A2G8T3X3	Massilia psychrophila
A0A2G8T3X3	Massilia psychrophila	A0A2S2DF75	Massilia oculi
A0A2G8T3X3	Massilia psychrophila	A0A2T5T9N8	Massilia sp. GV045
A0A2G8T3X3	Massilia psychrophila	A7ICK4	Xanthobacter autotrophicus Py2
A0A2H6IZH9	bacterium BMS3Bbin10	A0A2H6IZH9	bacterium BMS3Bbin10
A0A2I6S3D5	Azoarcus sp. SY39	A0A2I6S3D5	Azoarcus sp. SY39
A0A2I6S3G5	Azoarcus sp. SY39	A0A2I6S3G5	Azoarcus sp. SY39
A0A2M6XQM9	Methylobacterium sp. CG09_land_8_20_14_0_10_71_15	A0A089NU55	Methylobacterium oryzae CBMB20
A0A2M6XQM9	Methylobacterium sp. CG09_land_8_20_14_0_10_71_15	A0A0E9K7S4	Methylobacterium sp. ME121
A0A2M6XQM9	Methylobacterium sp. CG09_land_8_20_14_0_10_71_15	A0A0L6JA28	Methylobacterium sp. ARG-1
A0A2M6XQM9	Methylobacterium sp. CG09_land_8_20_14_0_10_71_15	A0A0Q5ZKT6	Methylobacterium sp. Leaf399
A0A2M6XQM9	Methylobacterium sp. CG09_land_8_20_14_0_10_71_15	A0A0V7YYM7	Methylobacterium sp. GXS13
A0A2M6XQM9	Methylobacterium sp. CG09_land_8_20_14_0_10_71_15	A0A1G5TCE5	Methylobacterium sp. UNC378MF
A0A2M6XQM9	Methylobacterium sp. CG09_land_8_20_14_0_10_71_15	A0A1G9ZFT8	Methylobacterium phyllostachyos
A0A2M6XQM9	Methylobacterium sp. CG09_land_8_20_14_0_10_71_15	A0A1I3J2U9	Methylobacterium brachiatum
A0A2M6XQM9	Methylobacterium sp. CG09_land_8_20_14_0_10_71_15	A0A1I4L2P1	Methylobacterium pseudosasicola
A0A2M6XQM9	Methylobacterium sp. CG09_land_8_20_14_0_10_71_15	A0A1I6T5Z6	Methylobacterium sp. yr668
A0A2M6XQM9	Methylobacterium sp. CG09_land_8_20_14_0_10_71_15	A0A2H6BET2	Methylopila sp. Yamaguchi
A0A2M6XQM9	Methylobacterium sp. CG09_land_8_20_14_0_10_71_15	A0A2M6XQM9	Methylobacterium sp. CG09_land_8_20_14_0_10_71_15
A0A2M6XQM9	Methylobacterium sp. CG09_land_8_20_14_0_10_71_15	A0A2U8VUY2	Methylobacterium sp. 17Sr1-43
A0A2M6XQM9	Methylobacterium sp. CG09_land_8_20_14_0_10_71_15	A0A2U8W2N0	Methylobacterium sp. 17SD2-17
A0A2M6XQM9	Methylobacterium sp. CG09_land_8_20_14_0_10_71_15	A0A2U8W5D9	Methylobacterium sp. 17SD2-17
A0A2M6XQM9	Methylobacterium sp. CG09_land_8_20_14_0_10_71_15	A0A2W5MNI4	Starkeya novella
A0A2M6XQM9	Methylobacterium sp. CG09_land_8_20_14_0_10_71_15	M7YVR3	Methylobacterium mesophilicum SR1.6/6
A0A2N9LNG0	Burkholderiales bacterium	A0A2N9LNG0	Burkholderiales bacterium
A0A2N9LNG0	Burkholderiales bacterium	A0A2P9H4G8	Burkholderiales bacterium
A0A2P5KS42	Hyphomicrobium sp.	A0A2P5KS42	Hyphomicrobium sp.
A0A2P5KS42	Hyphomicrobium sp.	A0A2S5PEP3	Hyphomicrobium sp.
A0A2P8CML3	Murinocardiopsis flavida	A0A2P8CML3	Murinocardiopsis flavida
A0A2P8QAJ3	Streptomyces sp. A217	A0A060ZHR0	Streptomyces iranensis
A0A2P8QAJ3	Streptomyces sp. A217	A0A066Y5A2	Streptomyces olindensis
A0A2P8QAJ3	Streptomyces sp. A217	A0A086GK34	Streptomyces scabiei
A0A2P8QAJ3	Streptomyces sp. A217	A0A086MUV5	Streptomyces luteus
A0A2P8QAJ3	Streptomyces sp. A217	A0A0A0N539	Streptomyces rapamycinicus NRRL 5491
A0A2P8QAJ3	Streptomyces sp. A217	A0A0C1X8V0	Streptomyces sp. AcH 505
A0A2P8QAJ3	Streptomyces sp. A217	A0A0C2BHW9	Streptomyces sp. 150FB
A0A2P8QAJ3	Streptomyces sp. A217	A0A0C5G8R2	Streptomyces cyaneogriseus subsp. noncyanogenus
A0A2P8QAJ3	Streptomyces sp. A217	A0A0F7VUH1	Streptomyces leeuwenhoekii
A0A2P8QAJ3	Streptomyces sp. A217	A0A0H4CL18	Streptomyces sp. PBH53
A0A2P8QAJ3	Streptomyces sp. A217	A0A0J7ZLZ9	Streptomyces viridochromogenes
A0A2P8QAJ3	Streptomyces sp. A217	A0A0J8A582	Streptomyces regensis
A0A2P8QAJ3	Streptomyces sp. A217	A0A0L0JGN2	Streptomyces acidiscabies
A0A2P8QAJ3	Streptomyces sp. A217	A0A0L0KPQ1	Streptomyces stelliscabiei
A0A2P8QAJ3	Streptomyces sp. A217	A0A0L8LXK3	Streptomyces resistomycificus
A0A2P8QAJ3	Streptomyces sp. A217	A0A0M2GL39	Streptomyces variegatus
A0A2P8QAJ3	Streptomyces sp. A217	A0A0M4D831	Streptomyces pristinaespiralis
A0A2P8QAJ3	Streptomyces sp. A217	A0A0M8SFV5	Streptomyces sp. WM6378
A0A2P8QAJ3	Streptomyces sp. A217	A0A0M8VBX3	Streptomyces sp. MMG1121
A0A2P8QAJ3	Streptomyces sp. A217	A0A0M8WU46	Streptomyces sp. NRRL B-1140
A0A2P8QAJ3	Streptomyces sp. A217	A0A0M8YVM8	Streptomyces sp. NRRL F-7442
A0A2P8QAJ3	Streptomyces sp. A217	A0A0M9YY94	Streptomyces sp. MMG1533
A0A2P8QAJ3	Streptomyces sp. A217	A0A0M9ZP37	Streptomyces sp. AS58
A0A2P8QAJ3	Streptomyces sp. A217	A0A0N0HTI9	Streptomyces sp. NRRL WC-3753
A0A2P8QAJ3	Streptomyces sp. A217	A0A0N0NC45	Actinobacteria bacterium OV320
A0A2P8QAJ3	Streptomyces sp. A217	A0A0N1GG18	Actinobacteria bacterium OK074
A0A2P8QAJ3	Streptomyces sp. A217	A0A0N1GS40	Actinobacteria bacterium OK006
A0A2P8QAJ3	Streptomyces sp. A217	A0A0N6ZU25	Streptomyces sp. CCM_MD2014
A0A2P8QAJ3	Streptomyces sp. A217	A0A0S2PAC3	Streptomyces hygroscopicus subsp. limoneus
A0A2P8QAJ3	Streptomyces sp. A217	A0A0T1U9R8	Streptomyces sp. Root1310
A0A2P8QAJ3	Streptomyces sp. A217	A0A0U3PUH7	Streptomyces sp. 4F
A0A2P8QAJ3	Streptomyces sp. A217	A0A0U3QPM3	Streptomyces sp. CdTB01
A0A2P8QAJ3	Streptomyces sp. A217	A0A0U5MHC6	Streptomyces reticuli
A0A2P8QAJ3	Streptomyces sp. A217	A0A0W7WVL9	Streptomyces silvensis
A0A2P8QAJ3	Streptomyces sp. A217	A0A0X3S526	Streptomyces sp. NRRL F-5122
A0A2P8QAJ3	Streptomyces sp. A217	A0A0X3VDV1	Streptomyces violaceusniger
A0A2P8QAJ3	Streptomyces sp. A217	A0A0X3XQW5	Streptomyces sp. NRRL WC-3605
A0A2P8QAJ3	Streptomyces sp. A217	A0A100JF21	Streptomyces acidiscabies
A0A2P8QAJ3	Streptomyces sp. A217	A0A100JS86	Streptomyces scabiei
A0A2P8QAJ3	Streptomyces sp. A217	A0A101J9B8	Streptomyces regalis
A0A2P8QAJ3	Streptomyces sp. A217	A0A101P1X3	Streptomyces yokosukanensis
A0A2P8QAJ3	Streptomyces sp. A217	A0A101QL91	Streptomyces corchorusii
A0A2P8QAJ3	Streptomyces sp. A217	A0A117RRV5	Streptomyces caeruleatus
A0A2P8QAJ3	Streptomyces sp. A217	A0A117S0L9	Streptomyces sp. RV15
A0A2P8QAJ3	Streptomyces sp. A217	A0A124H4Q4	Streptomyces curacoi
A0A2P8QAJ3	Streptomyces sp. A217	A0A143C9F8	Streptomyces qaidamensis
A0A2P8QAJ3	Streptomyces sp. A217	A0A151DKM2	Streptomyces sp. CC71
A0A2P8QAJ3	Streptomyces sp. A217	A0A177HGY2	Streptomyces jeddahensis
A0A2P8QAJ3	Streptomyces sp. A217	A0A191V646	Streptomyces parvulus
A0A2P8QAJ3	Streptomyces sp. A217	A0A1A9C437	Streptomyces sp. DI166
A0A2P8QAJ3	Streptomyces sp. A217	A0A1B1MKT5	Streptomyces lincolnensis
A0A2P8QAJ3	Streptomyces sp. A217	A0A1C4SI10	Streptomyces sp. SolWspMP-5a-2
A0A2P8QAJ3	Streptomyces sp. A217	A0A1C4TGW3	Streptomyces sp. DvalAA-43
A0A2P8QAJ3	Streptomyces sp. A217	A0A1C5E9D1	Streptomyces sp. MnatMP-M17
A0A2P8QAJ3	Streptomyces sp. A217	A0A1C5F8E2	Streptomyces sp. MnatMP-M27
A0A2P8QAJ3	Streptomyces sp. A217	A0A1C6PI50	Streptomyces sp. LamerLS-316
A0A2P8QAJ3	Streptomyces sp. A217	A0A1D8SXJ8	Streptomyces olivaceus
A0A2P8QAJ3	Streptomyces sp. A217	A0A1E5P3M1	Streptomyces agglomeratus
A0A2P8QAJ3	Streptomyces sp. A217	A0A1G5LUL9	Streptomyces sp. 136MFCol5.1
A0A2P8QAJ3	Streptomyces sp. A217	A0A1G8UCU6	Streptomyces indicus
A0A2P8QAJ3	Streptomyces sp. A217	A0A1G9ZP90	Streptomyces wuyuanensis
A0A2P8QAJ3	Streptomyces sp. A217	A0A1H0ACK8	Streptomyces sp. cf386
A0A2P8QAJ3	Streptomyces sp. A217	A0A1H2D903	Streptomyces sp. 2114.2
A0A2P8QAJ3	Streptomyces sp. A217	A0A1H4VS54	Streptomyces melanosporofaciens
A0A2P8QAJ3	Streptomyces sp. A217	A0A1H5B2N4	Streptomyces sp. PAN_FS17
A0A2P8QAJ3	Streptomyces sp. A217	A0A1H5GDU7	Streptomyces sp. Ag109_O5-10
A0A2P8QAJ3	Streptomyces sp. A217	A0A1H5LF88	Streptomyces sp. 3213.3
A0A2P8QAJ3	Streptomyces sp. A217	A0A1H9DM00	Streptomyces sp. yr375
A0A2P8QAJ3	Streptomyces sp. A217	A0A1I4W6U4	Streptomyces sp. cf124
A0A2P8QAJ3	Streptomyces sp. A217	A0A1J4NZR2	Streptomyces mangrovisoli
A0A2P8QAJ3	Streptomyces sp. A217	A0A1P8Y2X6	Streptomyces autolyticus
A0A2P8QAJ3	Streptomyces sp. A217	A0A1Q5DEK9	Streptomyces sp. CB02058
A0A2P8QAJ3	Streptomyces sp. A217	A0A1Q5LQS1	Streptomyces sp. CB03234
A0A2P8QAJ3	Streptomyces sp. A217	A0A1Q5MIQ8	Streptomyces sp. CB02400
A0A2P8QAJ3	Streptomyces sp. A217	A0A1R0LL47	Streptomyces sp. IMTB 2501
A0A2P8QAJ3	Streptomyces sp. A217	A0A1R1SSK7	Streptomyces sparsogenes DSM 40356
A0A2P8QAJ3	Streptomyces sp. A217	A0A1R1WEP2	Streptomyces sp. M1013
A0A2P8QAJ3	Streptomyces sp. A217	A0A1S2PUA7	Streptomyces sp. MUSC 14
A0A2P8QAJ3	Streptomyces sp. A217	A0A1S6J4C9	Streptomyces pactum
A0A2P8QAJ3	Streptomyces sp. A217	A0A1S6REG8	Streptomyces hygroscopicus
A0A2P8QAJ3	Streptomyces sp. A217	A0A1S9NI54	Streptomyces antibioticus
A0A2P8QAJ3	Streptomyces sp. A217	A0A1U9R2D4	Streptomyces niveus
A0A2P8QAJ3	Streptomyces sp. A217	A0A1V1YCZ7	Streptomyces sp. WAC00263
A0A2P8QAJ3	Streptomyces sp. A217	A0A1V4AEM8	Streptomyces tsukubensis
A0A2P8QAJ3	Streptomyces sp. A217	A0A1V4D8C8	Streptomyces antioxidans
A0A2P8QAJ3	Streptomyces sp. A217	A0A1V6MMK7	Streptomyces phaeoluteigriseus
A0A2P8QAJ3	Streptomyces sp. A217	A0A1V9KI91	Streptomyces sp. M41(2017)
A0A2P8QAJ3	Streptomyces sp. A217	A0A1V9WN84	Streptomyces sp. B9173
A0A2P8QAJ3	Streptomyces sp. A217	A0A1X2N0J5	Streptomyces sp. 4F
A0A2P8QAJ3	Streptomyces sp. A217	A0A1X4I546	Streptomyces sp. 13-12-16
A0A2P8QAJ3	Streptomyces sp. A217	A0A1X7CKI8	Streptomyces sp. Amel2xC10
A0A2P8QAJ3	Streptomyces sp. A217	A0A209C2Z2	Streptomyces sp. CS113
A0A2P8QAJ3	Streptomyces sp. A217	A0A209CWB2	Streptomyces sp. CS159
A0A2P8QAJ3	Streptomyces sp. A217	A0A222T4J0	Streptomyces sp. 11-1-2
A0A2P8QAJ3	Streptomyces sp. A217	A0A229H652	Streptomyces sp. NBS 14/10
A0A2P8QAJ3	Streptomyces sp. A217	A0A231PJP9	Streptomyces sp. XY006
A0A2P8QAJ3	Streptomyces sp. A217	A0A233S3T6	Streptomyces diastatochromogenes
A0A2P8QAJ3	Streptomyces sp. A217	A0A250V3L8	Streptomyces olivochromogenes
A0A2P8QAJ3	Streptomyces sp. A217	A0A269TRB7	Streptomyces sp. alain-838
A0A2P8QAJ3	Streptomyces sp. A217	A0A270QMT3	Streptomyces sp. Alain-F2R5
A0A2P8QAJ3	Streptomyces sp. A217	A0A286CRX0	Streptomyces sp. Ag82_G6-1
A0A2P8QAJ3	Streptomyces sp. A217	A0A286EBM9	Streptomyces sp. 1222.2
A0A2P8QAJ3	Streptomyces sp. A217	A0A286HJP5	Streptomyces sp. Ag109_G2-15
A0A2P8QAJ3	Streptomyces sp. A217	A0A291QK59	Streptomyces formicae
A0A2P8QAJ3	Streptomyces sp. A217	A0A2A2Z944	Streptomyces sp. SA15
A0A2P8QAJ3	Streptomyces sp. A217	A0A2A3GUS4	Streptomyces sp. Tue6028
A0A2P8QAJ3	Streptomyces sp. A217	A0A2A3J0U3	Streptomyces sp. Ag82_O1-15
A0A2P8QAJ3	Streptomyces sp. A217	A0A2G7AFB0	Streptomyces sp. 94
A0A2P8QAJ3	Streptomyces sp. A217	A0A2G7C5T6	Streptomyces sp. 93
A0A2P8QAJ3	Streptomyces sp. A217	A0A2G7F9T1	Streptomyces sp. 70
A0A2P8QAJ3	Streptomyces sp. A217	A0A2G9DT27	Streptomyces sp. JV178
A0A2P8QAJ3	Streptomyces sp. A217	A0A2I0SHW0	Streptomyces populi
A0A2P8QAJ3	Streptomyces sp. A217	A0A2J7YV84	Streptomyces malaysiensis
A0A2P8QAJ3	Streptomyces sp. A217	A0A2L2MFX7	Streptomyces dengpaensis
A0A2P8QAJ3	Streptomyces sp. A217	A0A2L2MWP2	Streptomyces dengpaensis
A0A2P8QAJ3	Streptomyces sp. A217	A0A2M9K3H2	Streptomyces sp. CB01635
A0A2P8QAJ3	Streptomyces sp. A217	A0A2N0J276	Streptomyces sp. 69
A0A2P8QAJ3	Streptomyces sp. A217	A0A2N3U1J9	Streptomyces sp. 73
A0A2P8QAJ3	Streptomyces sp. A217	A0A2N4A1C6	Streptomyces sp. OK885
A0A2P8QAJ3	Streptomyces sp. A217	A0A2N8TFN6	Streptomyces sp. 13K301
A0A2P8QAJ3	Streptomyces sp. A217	A0A2N9B3E2	Streptomyces chartreusis NRRL 3882
A0A2P8QAJ3	Streptomyces sp. A217	A0A2P8QAJ3	Streptomyces sp. A217
A0A2P8QAJ3	Streptomyces sp. A217	A0A2P9EXD7	Streptomyces sp. MA5143a
A0A2P8QAJ3	Streptomyces sp. A217	A0A2R4TB48	Streptomyces lunaelactis
A0A2P8QAJ3	Streptomyces sp. A217	A0A2S1IQQ9	Streptomyces nigra
A0A2P8QAJ3	Streptomyces sp. A217	A0A2S4Y831	Streptomyces sp. Ru72
A0A2P8QAJ3	Streptomyces sp. A217	A0A2S4YJV7	Streptomyces sp. Ru71
A0A2P8QAJ3	Streptomyces sp. A217	A0A2S4ZLQ1	Streptomyces sp. Ru62
A0A2P8QAJ3	Streptomyces sp. A217	A0A2S6PJ77	Streptomyces sp. QL37
A0A2P8QAJ3	Streptomyces sp. A217	A0A2S6WM65	Streptomyces sp. 46
A0A2P8QAJ3	Streptomyces sp. A217	A0A2S6XAL1	Streptomyces sp. MH60
A0A2P8QAJ3	Streptomyces sp. A217	A0A2T4NT10	Streptomyces sp. A244
A0A2P8QAJ3	Streptomyces sp. A217	A0A2T5BLM4	Streptomyces sp. VMFN-G11Ma
A0A2P8QAJ3	Streptomyces sp. A217	A0A2T7MH67	Streptomyces sp. CS207
A0A2P8QAJ3	Streptomyces sp. A217	A0A2T7T9Q3	Streptomyces scopuliridis RB72
A0A2P8QAJ3	Streptomyces sp. A217	A0A2U2F1B8	Streptomyces sp. SMS_SU21
A0A2P8QAJ3	Streptomyces sp. A217	A0A2U2ZJ36	Streptomyces sp. NWU339
A0A2P8QAJ3	Streptomyces sp. A217	A0A2U3H5R9	Streptomyces sp. NWU49
A0A2P8QAJ3	Streptomyces sp. A217	A0A2V1NSZ9	Streptomyces sp. V2
A0A2P8QAJ3	Streptomyces sp. A217	A0A2V2QME3	Streptomyces sp. FT05W
A0A2P8QAJ3	Streptomyces sp. A217	A0A2Z4IW55	Streptomyces sp. ZFG47
A0A2P8QAJ3	Streptomyces sp. A217	A0A2Z5KB18	Streptomyces sp. Go-475
A0A2P8QAJ3	Streptomyces sp. A217	A0A327WJD7	Streptomyces sp. PsTaAH-137
A0A2P8QAJ3	Streptomyces sp. A217	A0A345TNI2	Streptomyces sp. ETH9427
A0A2P8QAJ3	Streptomyces sp. A217	A0A345XJ15	Streptomyces armeniacus
A0A2P8QAJ3	Streptomyces sp. A217	A0A369V1X4	Streptomyces parvulus
A0A2P8QAJ3	Streptomyces sp. A217	A0A370B765	Streptomyces sp. AC230
A0A2P8QAJ3	Streptomyces sp. A217	A0A370VYM0	Streptomyces sp. M7
A0A2P8QAJ3	Streptomyces sp. A217	A0A371XQ22	Streptomyces sp. AcE210
A0A2P8QAJ3	Streptomyces sp. A217	A0A372MAK8	Streptomyces sp. NEAU-YY421
A0A2P8QAJ3	Streptomyces sp. A217	C9ZD66	Streptomyces scabiei 87.22
A0A2P8QAJ3	Streptomyces sp. A217	D6A5Z1	Streptomyces viridosporus ATCC 14672
A0A2P8QAJ3	Streptomyces sp. A217	D7C0W4	Streptomyces bingchenggensis BCW-1
A0A2P8QAJ3	Streptomyces sp. A217	D9WTU6	Streptomyces himastatinicus ATCC 53653
A0A2P8QAJ3	Streptomyces sp. A217	D9X5S5	Streptomyces viridochromogenes DSM 40736
A0A2P8QAJ3	Streptomyces sp. A217	D9Y117	Streptomyces griseoflavus Tu4000
A0A2P8QAJ3	Streptomyces sp. A217	G2GAT1	Streptomyces zinciresistens K42
A0A2P8QAJ3	Streptomyces sp. A217	G2NYR1	Streptomyces violaceusniger Tu 4113
A0A2P8QAJ3	Streptomyces sp. A217	K4QTD8	Streptomyces davaonensis JCM 4913
A0A2P8QAJ3	Streptomyces sp. A217	L1KGW4	Streptomyces ipomoeae 91-03
A0A2P8QAJ3	Streptomyces sp. A217	L8PK74	Streptomyces viridochromogenes Tue57
A0A2P8QAJ3	Streptomyces sp. A217	M3C1A0	Streptomyces gancidicus BKS 13-15
A0A2P8QAJ3	Streptomyces sp. A217	M3EXH9	Streptomyces bottropensis ATCC 25435
A0A2P8QAJ3	Streptomyces sp. A217	Q82M40	Streptomyces avermitilis MA-4680 = NBRC 14893
A0A2P8QAJ3	Streptomyces sp. A217	S2ZTR5	Streptomyces sp. HGB0020
A0A2P8QAJ3	Streptomyces sp. A217	S4AHN6	Streptomyces aurantiacus JA 4570
A0A2P8QAJ3	Streptomyces sp. A217	S4MWR1	Streptomyces afghaniensis 772
A0A2P8QAJ3	Streptomyces sp. A217	V6KIT0	Streptomyces niveus NCIMB 11891
A0A2P8QAJ3	Streptomyces sp. A217	V6L1J7	Streptomyces roseochromogenus subsp. oscitans DS 1
A0A2S3QFY2	Sulfobacillus sp. hq2	A0A2S3QFY2	Sulfobacillus sp. hq2
A0A2S3QFY2	Sulfobacillus sp. hq2	A0A2T2WXE3	Sulfobacillus benefaciens
A0A2S4DR46	Candidatus Entotheonella serta	A0A2S4DR46	Candidatus Entotheonella serta
A0A2S4DR46	Candidatus Entotheonella serta	W4LZ74	Candidatus Entotheonella factor
A0A2S4DR46	Candidatus Entotheonella serta	W4MH97	Candidatus Entotheonella gemina
A0A2S6UC61	Alphaproteobacteria bacterium MarineAlpha3_Bin4	A0A2S6UC61	Alphaproteobacteria bacterium MarineAlpha3_Bin4
A0A2S6UH32	Alphaproteobacteria bacterium MarineAlpha4_Bin1	A0A2S6UH32	Alphaproteobacteria bacterium MarineAlpha4_Bin1
A0A2S9Q719	Labrys okinawensis	A0A2S9Q719	Labrys okinawensis
A0A2T0PY57	Allonocardiopsis opalescens	A0A2T0PY57	Allonocardiopsis opalescens
A0A2T1HSS8	Alsobacter sp. SH9	A0A2T1HSS8	Alsobacter sp. SH9
A0A2T1HSS8	Alsobacter sp. SH9	B0UJR8	Methylobacterium sp. 4-46
A0A2T1HSS8	Alsobacter sp. SH9	H0HQ59	Mesorhizobium alhagi CCNWXJ12-2
A0A2T2WJD2	Sulfobacillus acidophilus	A0A2T2WJD2	Sulfobacillus acidophilus
A0A2T2WJD2	Sulfobacillus acidophilus	A0A2T2XHK8	Sulfobacillus benefaciens
A0A2T6MZ29	gamma proteobacterium symbiont of Ctena orbiculata	A0A2T6MZ29	gamma proteobacterium symbiont of Ctena orbiculata
A0A2T6MZ36	gamma proteobacterium symbiont of Ctena orbiculata	A0A2T6MZ36	gamma proteobacterium symbiont of Ctena orbiculata
A0A2T7T709	Streptomyces scopuliridis RB72	A0A2T7T709	Streptomyces scopuliridis RB72
A0A2V1IPP0	Muribaculaceae bacterium DSM 103720	A0A2V1IPP0	Muribaculaceae bacterium DSM 103720
A0A2V1J0Z5	Muribaculaceae bacterium DSM 100764	A0A2V1J0Z5	Muribaculaceae bacterium DSM 100764
A0A2V1J0Z5	Muribaculaceae bacterium DSM 100764	A0A354HZG4	Porphyromonadaceae bacterium
A0A2V1J0Z5	Muribaculaceae bacterium DSM 100764	A0A355Z7A2	Porphyromonadaceae bacterium
A0A2V1J0Z5	Muribaculaceae bacterium DSM 100764	R5AXI8	Bacteroides sp. CAG:927
A0A2V7C257	Candidatus Rokubacteria bacterium	A0A2V7C257	Candidatus Rokubacteria bacterium
A0A2V9S382	Acidobacteria bacterium	A0A2V9S382	Acidobacteria bacterium
A0A2W2CQW5	Salinispora sp. 13K206	A0A2W2CQW5	Salinispora sp. 13K206
A0A2W4K0F3	Proteobacteria bacterium	A0A2W4K0F3	Proteobacteria bacterium
A0A2W4RWY8	Proteobacteria bacterium	A0A2W4N2Y6	Proteobacteria bacterium
A0A2W4RWY8	Proteobacteria bacterium	A0A2W4RWY8	Proteobacteria bacterium
A0A2W5J581	Azospira oryzae	A0A2W5J581	Azospira oryzae
A0A2Z6TDS6	Lactobacillus rodentium	A0A0R2KS09	Lactobacillus amylovorus DSM 16698
A0A2Z6TDS6	Lactobacillus rodentium	A0A2Z6TDS6	Lactobacillus rodentium
A0A344L226	Amycolatopsis albispora	A0A1Q8BQG0	Actinophytocola xinjiangensis
A0A344L226	Amycolatopsis albispora	A0A1Q8CM32	Actinophytocola xanthii
A0A344L226	Amycolatopsis albispora	A0A344L226	Amycolatopsis albispora
A0A346R3F2	Breoghania sp. L-A4	A0A346R3F2	Breoghania sp. L-A4
A0A365NR51	Herminiimonas fonticola	A0A365NR51	Herminiimonas fonticola
A0A365NR51	Herminiimonas fonticola	A4G242	Herminiimonas arsenicoxydans
A0A365NR51	Herminiimonas fonticola	A6SUZ4	Janthinobacterium sp. Marseille
A0A365NWD8	Herminiimonas fonticola	A0A365NWD8	Herminiimonas fonticola
A0A365NWD8	Herminiimonas fonticola	A6T0J2	Janthinobacterium sp. Marseille
A0A368VCD2	Halopolyspora algeriensis	A0A368VCD2	Halopolyspora algeriensis
A0A371BE64	Pseudolabrys sp. GY_H	A0A0Q7U3Z9	Pseudolabrys sp. Root1462
A0A371BE64	Pseudolabrys sp. GY_H	A0A1Q4DJU2	Rhizobiales bacterium 64-17
A0A371BE64	Pseudolabrys sp. GY_H	A0A1W7A0K9	Pseudorhodoplanes sinuspersici
A0A371BE64	Pseudolabrys sp. GY_H	A0A346A4T5	Pseudolabrys taiwanensis
A0A371BE64	Pseudolabrys sp. GY_H	A0A371BE64	Pseudolabrys sp. GY_H
A0A377BTA6	Escherichia coli	A0A023Z0D7	Escherichia coli O145:H28 str. RM12581
A0A377BTA6	Escherichia coli	A0A024KXD2	Escherichia coli D6-113.11
A0A377BTA6	Escherichia coli	A0A025CVH8	Escherichia coli O145:NM str. 2010C-3526
A0A377BTA6	Escherichia coli	A0A026UK07	Escherichia coli O174:H8 str. 04-3038
A0A377BTA6	Escherichia coli	A0A028EDB1	Escherichia coli O118:H16 str. 2009C-4446
A0A377BTA6	Escherichia coli	A0A029HU27	Escherichia coli 2-005-03_S4_C3
A0A377BTA6	Escherichia coli	A0A069XSE0	Escherichia coli 3-373-03_S4_C2
A0A377BTA6	Escherichia coli	A0A070SKW5	Escherichia coli 2-210-07_S3_C3
A0A377BTA6	Escherichia coli	A0A073HBS9	Escherichia coli 5-366-08_S1_C3
A0A377BTA6	Escherichia coli	A0A080IWR8	Escherichia coli 1-250-04_S3_C2
A0A377BTA6	Escherichia coli	A0A090NLK2	Shigella dysenteriae WRSd3
A0A377BTA6	Escherichia coli	A0A0B1N9J8	Escherichia coli
A0A377BTA6	Escherichia coli	A0A0E1SU03	Escherichia coli 53638
A0A377BTA6	Escherichia coli	A0A0H2QFH1	Moellerella wisconsensis
A0A377BTA6	Escherichia coli	A0A0H3EL04	Escherichia coli O83:H1 str. NRG 857C
A0A377BTA6	Escherichia coli	A0A0I0S6D3	Shigella sonnei
A0A377BTA6	Escherichia coli	A0A0I1AHS0	Shigella sonnei
A0A377BTA6	Escherichia coli	A0A0J2EEQ3	Escherichia coli
A0A377BTA6	Escherichia coli	A0A0K4YN22	Escherichia coli
A0A377BTA6	Escherichia coli	A0A0K9TBI9	Escherichia coli M114
A0A377BTA6	Escherichia coli	A0A0L0ALL8	Klebsiella sp. RIT-PI-d
A0A377BTA6	Escherichia coli	A0A0L7ANW7	Escherichia coli
A0A377BTA6	Escherichia coli	A0A0N0ZB74	Moellerella wisconsensis ATCC 35017
A0A377BTA6	Escherichia coli	A0A140NMR5	Providencia stuartii MRSN 2154
A0A377BTA6	Escherichia coli	A0A163DH69	Escherichia coli
A0A377BTA6	Escherichia coli	A0A192ER68	Escherichia coli
A0A377BTA6	Escherichia coli	A0A1B7JUA8	Providencia heimbachae ATCC 35613
A0A377BTA6	Escherichia coli	A0A1B7KKZ3	Obesumbacterium proteus ATCC 12841
A0A377BTA6	Escherichia coli	A0A1B8SW60	Providencia rettgeri
A0A377BTA6	Escherichia coli	A0A1C7CW93	Escherichia coli
A0A377BTA6	Escherichia coli	A0A1E3N450	Shigella sp. FC569
A0A377BTA6	Escherichia coli	A0A1Q6B5H0	Escherichia coli
A0A377BTA6	Escherichia coli	A0A1S1HMP7	Providencia stuartii
A0A377BTA6	Escherichia coli	A0A1U9T5R4	Escherichia coli
A0A377BTA6	Escherichia coli	A0A1X3JFJ1	Escherichia coli H386
A0A377BTA6	Escherichia coli	A0A1X3KZX2	Escherichia coli H420
A0A377BTA6	Escherichia coli	A0A209A2M1	Yersinia frederiksenii
A0A377BTA6	Escherichia coli	A0A209AX82	Yersinia frederiksenii
A0A377BTA6	Escherichia coli	A0A243V169	Escherichia coli
A0A377BTA6	Escherichia coli	A0A264VRD6	Providencia rettgeri
A0A377BTA6	Escherichia coli	A0A271QWH6	Escherichia coli
A0A377BTA6	Escherichia coli	A0A2H9A2G6	Escherichia coli
A0A377BTA6	Escherichia coli	A0A2H9G5A7	Escherichia coli
A0A377BTA6	Escherichia coli	A0A2I6E5X4	Enterobacter cancerogenus
A0A377BTA6	Escherichia coli	A0A2I6F1Z8	Escherichia coli
A0A377BTA6	Escherichia coli	A0A2J7P3D3	Enterobacter cancerogenus
A0A377BTA6	Escherichia coli	A0A2R3LY12	Providencia rettgeri
A0A377BTA6	Escherichia coli	A0A2S8DKM3	Shigella boydii
A0A377BTA6	Escherichia coli	A0A2S8JKC0	Escherichia coli
A0A377BTA6	Escherichia coli	A0A2U9L1X9	Providencia rettgeri
A0A377BTA6	Escherichia coli	A0A2W6PGI2	Escherichia coli
A0A377BTA6	Escherichia coli	A0A2X1KJL9	Escherichia coli
A0A377BTA6	Escherichia coli	A0A2X5G0L0	Escherichia coli
A0A377BTA6	Escherichia coli	A0A2X6FMF8	Escherichia coli
A0A377BTA6	Escherichia coli	A0A2X6IGH3	Escherichia coli
A0A377BTA6	Escherichia coli	A0A2Y0SWK3	Escherichia coli
A0A377BTA6	Escherichia coli	A0A2Z2J8H3	Escherichia coli
A0A377BTA6	Escherichia coli	A0A330CV66	Escherichia coli
A0A377BTA6	Escherichia coli	A0A335E2Z6	Acinetobacter baumannii
A0A377BTA6	Escherichia coli	A0A345LZB1	Providencia sp. WCHPr000369
A0A377BTA6	Escherichia coli	A0A369DPH8	Escherichia coli
A0A377BTA6	Escherichia coli	A0A369G9R5	Escherichia coli
A0A377BTA6	Escherichia coli	A0A376D520	Escherichia coli
A0A377BTA6	Escherichia coli	A0A376IN17	Escherichia coli
A0A377BTA6	Escherichia coli	A0A376JI15	Escherichia coli
A0A377BTA6	Escherichia coli	A0A376RYR5	Escherichia coli
A0A377BTA6	Escherichia coli	A0A377BTA6	Escherichia coli
A0A377BTA6	Escherichia coli	A0A377D274	Escherichia coli
A0A377BTA6	Escherichia coli	A0A379G124	Providencia rustigianii
A0A377BTA6	Escherichia coli	D2AG64	Shigella flexneri 2002017
A0A377BTA6	Escherichia coli	E9XKN1	Escherichia coli TW10509
A0A377BTA6	Escherichia coli	I6CIJ7	Shigella flexneri K-315
A0A377BTA6	Escherichia coli	I6GZK2	Shigella flexneri 1235-66
A0A377BTA6	Escherichia coli	K8WVF2	Providencia sneebia DSM 19967
A0A377BTA6	Escherichia coli	M9GF19	Escherichia coli MP021561.2
A0A377BTA6	Escherichia coli	U9XLW2	Escherichia coli 113303
A0A377BTA6	Escherichia coli	V0UR98	Escherichia coli 908519
A0A377BTA6	Escherichia coli	W1XEM4	Escherichia coli DORA_A_5_14_21
A0A379G0V5	Providencia rustigianii	A0A379G0V5	Providencia rustigianii
A0A382AED7	marine metagenome	A0A382AED7	marine metagenome
A0A382LY28	marine metagenome	A0A382LY28	marine metagenome
A4G241	Herminiimonas arsenicoxydans	A0A0E3V012	Polynucleobacter duraquae
A4G241	Herminiimonas arsenicoxydans	A0A191UG39	Polynucleobacter wuianus
A4G241	Herminiimonas arsenicoxydans	A0A1G3CQI0	Polynucleobacter sp. GWA2_45_21
A4G241	Herminiimonas arsenicoxydans	A0A1J0DQ32	Polynucleobacter asymbioticus
A4G241	Herminiimonas arsenicoxydans	A0A1L9GLC0	Polynucleobacter sp. MWH-Adler-W8
A4G241	Herminiimonas arsenicoxydans	A0A1R0HDA8	Polynucleobacter sphagniphilus
A4G241	Herminiimonas arsenicoxydans	A0A1S2T329	Polynucleobacter sp. QLW-P1DATA-2
A4G241	Herminiimonas arsenicoxydans	A0A210S021	Polynucleobacter hirudinilacicola
A4G241	Herminiimonas arsenicoxydans	A0A240E311	Polynucleobacter meluiroseus
A4G241	Herminiimonas arsenicoxydans	A0A254PXP7	Polynucleobacter campilacus
A4G241	Herminiimonas arsenicoxydans	A0A254Q123	Polynucleobacter aenigmaticus
A4G241	Herminiimonas arsenicoxydans	A0A259DEW8	Polynucleobacter sp. 24-46-87
A4G241	Herminiimonas arsenicoxydans	A0A259IPC2	Polynucleobacter sp. 39-46-10
A4G241	Herminiimonas arsenicoxydans	A0A2M8VJB9	Polynucleobacter sp. UB-Domo-W1
A4G241	Herminiimonas arsenicoxydans	A0A2Z4JGJ1	Polynucleobacter sp. MWH-Creno-4B4
A4G241	Herminiimonas arsenicoxydans	A0A2Z4JLA4	Polynucleobacter asymbioticus
A4G241	Herminiimonas arsenicoxydans	A4G241	Herminiimonas arsenicoxydans
A4G241	Herminiimonas arsenicoxydans	A6SUZ3	Janthinobacterium sp. Marseille
A6T0J0	Janthinobacterium sp. Marseille	A6T0J0	Janthinobacterium sp. Marseille
A7IEQ2	Xanthobacter autotrophicus Py2	A7IEQ2	Xanthobacter autotrophicus Py2
A8IFN8	Azorhizobium caulinodans ORS 571	A8IFN8	Azorhizobium caulinodans ORS 571
A8IM21	Azorhizobium caulinodans ORS 571	A0A1G4TYH4	Ancylobacter rudongensis
A8IM21	Azorhizobium caulinodans ORS 571	A0A257XE27	Azorhizobium sp. 12-66-6
A8IM21	Azorhizobium caulinodans ORS 571	A0A257ZQB5	Rhizobiales bacterium 12-68-15
A8IM21	Azorhizobium caulinodans ORS 571	A0A258DX79	Rhizobiales bacterium 32-66-8
A8IM21	Azorhizobium caulinodans ORS 571	A0A258I8B0	Rhizobiales bacterium 32-66-11
A8IM21	Azorhizobium caulinodans ORS 571	A0A258NL14	Azorhizobium sp. 35-67-15
A8IM21	Azorhizobium caulinodans ORS 571	A0A258ZAP5	Rhizobiales bacterium 24-66-13
A8IM21	Azorhizobium caulinodans ORS 571	A0A259CBR3	Rhizobiales bacterium 17-65-6
A8IM21	Azorhizobium caulinodans ORS 571	A0A259KVN7	Rhizobiales bacterium 39-66-18
A8IM21	Azorhizobium caulinodans ORS 571	A0A2W5RAA1	Starkeya novella
A8IM21	Azorhizobium caulinodans ORS 571	A7ICK2	Xanthobacter autotrophicus Py2
A8IM21	Azorhizobium caulinodans ORS 571	A8IM21	Azorhizobium caulinodans ORS 571
A8IM21	Azorhizobium caulinodans ORS 571	D7A6Q8	Starkeya novella DSM 506
B8IFX5	Methylobacterium nodulans ORS 2060	B8IFX5	Methylobacterium nodulans ORS 2060
B8IFX5	Methylobacterium nodulans ORS 2060	B8IWI0	Methylobacterium nodulans ORS 2060
C3X2D4	Oxalobacter formigenes HOxBLS	C3X2D4	Oxalobacter formigenes HOxBLS
C3X762	Oxalobacter formigenes HOxBLS	C3X762	Oxalobacter formigenes HOxBLS
C3X9Y2	Oxalobacter formigenes OXCC13	C3X9Y2	Oxalobacter formigenes OXCC13
E0MRZ9	Ahrensia sp. R2A130	A0A0F9LWP6	marine sediment metagenome
E0MRZ9	Ahrensia sp. R2A130	A0A2G2B1G6	Marinosulfonomonas sp.
E0MRZ9	Ahrensia sp. R2A130	E0MRZ9	Ahrensia sp. R2A130
E0MRZ9	Ahrensia sp. R2A130	E0MTY8	Ahrensia sp. R2A130
E0SNC9	Dickeya dadantii 3937	A0A071LN49	Mangrovibacter sp. MFB070
E0SNC9	Dickeya dadantii 3937	A0A1V8NTA5	Citrobacter braakii
E0SNC9	Dickeya dadantii 3937	A0A1X2RQC7	Salmonella enterica subsp. enterica serovar Rough
E0SNC9	Dickeya dadantii 3937	A0A2D1K058	Dickeya dianthicola RNS04.9
E0SNC9	Dickeya dadantii 3937	A0A2K8QGC8	Dickeya fangzhongdai
E0SNC9	Dickeya dadantii 3937	A0A2K8W0B2	Dickeya solani RNS 08.23.3.1.A
E0SNC9	Dickeya dadantii 3937	A0A2K9Q9H1	Dickeya zeae
E0SNC9	Dickeya dadantii 3937	C6C979	Dickeya paradisiaca Ech703
E0SNC9	Dickeya dadantii 3937	E0SNC9	Dickeya dadantii 3937
G0A8Y5	Collimonas fungivorans Ter331	A0A022GG59	Cupriavidus sp. SK-4
G0A8Y5	Collimonas fungivorans Ter331	A0A038GWE8	Caballeronia jiangsuensis
G0A8Y5	Collimonas fungivorans Ter331	A0A060P3Y3	Burkholderia sp. RPE67
G0A8Y5	Collimonas fungivorans Ter331	A0A069PCK7	Caballeronia glathei
G0A8Y5	Collimonas fungivorans Ter331	A0A0A1FDT1	Collimonas arenae
G0A8Y5	Collimonas fungivorans Ter331	A0A0A6QDU3	Paraburkholderia sacchari
G0A8Y5	Collimonas fungivorans Ter331	A0A0B3SVC7	Pandoraea pnomenusa
G0A8Y5	Collimonas fungivorans Ter331	A0A0B5FHP1	Pandoraea apista
G0A8Y5	Collimonas fungivorans Ter331	A0A0C5JY73	Pandoraea vervacti
G0A8Y5	Collimonas fungivorans Ter331	A0A0D0LPG5	Variovorax paradoxus
G0A8Y5	Collimonas fungivorans Ter331	A0A0D5VKN6	Paraburkholderia fungorum
G0A8Y5	Collimonas fungivorans Ter331	A0A0E3U6J5	Pandoraea oxalativorans
G0A8Y5	Collimonas fungivorans Ter331	A0A0F0F4U5	Burkholderiaceae bacterium 16
G0A8Y5	Collimonas fungivorans Ter331	A0A0F0FTK2	Burkholderiaceae bacterium 16
G0A8Y5	Collimonas fungivorans Ter331	A0A0F0FWA5	Burkholderiaceae bacterium 16
G0A8Y5	Collimonas fungivorans Ter331	A0A0G3ES15	Pandoraea thiooxydans
G0A8Y5	Collimonas fungivorans Ter331	A0A0H3WYT7	Pandoraea faecigallinarum
G0A8Y5	Collimonas fungivorans Ter331	A0A0J1D0V3	Caballeronia mineralivorans PML1(12)
G0A8Y5	Collimonas fungivorans Ter331	A0A0P0RFG4	Paraburkholderia caribensis MBA4
G0A8Y5	Collimonas fungivorans Ter331	A0A0P9CSL2	Variovorax paradoxus
G0A8Y5	Collimonas fungivorans Ter331	A0A0Q5NYA0	Burkholderia sp. Leaf177
G0A8Y5	Collimonas fungivorans Ter331	A0A0Q5P3E8	Burkholderia sp. Leaf177
G0A8Y5	Collimonas fungivorans Ter331	A0A0Q6WEP6	Massilia sp. Root351
G0A8Y5	Collimonas fungivorans Ter331	A0A0Q7ENC7	Massilia sp. Root418
G0A8Y5	Collimonas fungivorans Ter331	A0A0U2Y6J0	Pandoraea norimbergensis
G0A8Y5	Collimonas fungivorans Ter331	A0A0X8L878	Burkholderia sp. PAMC 26561
G0A8Y5	Collimonas fungivorans Ter331	A0A109CEK7	Variovorax sp. WDL1
G0A8Y5	Collimonas fungivorans Ter331	A0A125SMV2	Burkholderia sp. PAMC 26561
G0A8Y5	Collimonas fungivorans Ter331	A0A126YNL7	Burkholderia sp. PAMC 28687
G0A8Y5	Collimonas fungivorans Ter331	A0A126YRP0	Burkholderia sp. PAMC 28687
G0A8Y5	Collimonas fungivorans Ter331	A0A127PBE7	Collimonas fungivorans
G0A8Y5	Collimonas fungivorans Ter331	A0A127QZ66	Collimonas pratensis
G0A8Y5	Collimonas fungivorans Ter331	A0A142JSL2	Cupriavidus nantongensis
G0A8Y5	Collimonas fungivorans Ter331	A0A142Z0R3	Paraburkholderia caribensis
G0A8Y5	Collimonas fungivorans Ter331	A0A149PT06	Caballeronia megalochromosomata
G0A8Y5	Collimonas fungivorans Ter331	A0A158BAN6	Caballeronia arationis
G0A8Y5	Collimonas fungivorans Ter331	A0A158BTZ2	Caballeronia hypogeia
G0A8Y5	Collimonas fungivorans Ter331	A0A158C3N6	Caballeronia fortuita
G0A8Y5	Collimonas fungivorans Ter331	A0A158DNK9	Caballeronia pedi
G0A8Y5	Collimonas fungivorans Ter331	A0A158DQA4	Caballeronia calidae
G0A8Y5	Collimonas fungivorans Ter331	A0A158FLH8	Caballeronia udeis
G0A8Y5	Collimonas fungivorans Ter331	A0A158FU79	Caballeronia sordidicola
G0A8Y5	Collimonas fungivorans Ter331	A0A158GR78	Caballeronia sordidicola
G0A8Y5	Collimonas fungivorans Ter331	A0A158GRY1	Caballeronia telluris
G0A8Y5	Collimonas fungivorans Ter331	A0A158ILG6	Caballeronia cordobensis
G0A8Y5	Collimonas fungivorans Ter331	A0A158ISV8	Caballeronia terrestris
G0A8Y5	Collimonas fungivorans Ter331	A0A158J0W8	Caballeronia humi
G0A8Y5	Collimonas fungivorans Ter331	A0A158KAQ7	Caballeronia choica
G0A8Y5	Collimonas fungivorans Ter331	A0A160FVF7	Burkholderia sp. OLGA172
G0A8Y5	Collimonas fungivorans Ter331	A0A1A5X6F1	Paraburkholderia tropica
G0A8Y5	Collimonas fungivorans Ter331	A0A1A9MY02	Paraburkholderia ginsengiterrae
G0A8Y5	Collimonas fungivorans Ter331	A0A1C3UPU1	Cupriavidus alkaliphilus
G0A8Y5	Collimonas fungivorans Ter331	A0A1E3LEY2	Pandoraea sp. ISTKB
G0A8Y5	Collimonas fungivorans Ter331	A0A1G6L735	Burkholderia sp. TNe-862
G0A8Y5	Collimonas fungivorans Ter331	A0A1G6UTY6	Cupriavidus sp. YR651
G0A8Y5	Collimonas fungivorans Ter331	A0A1G6XBB7	Variovorax sp. CF079
G0A8Y5	Collimonas fungivorans Ter331	A0A1G8C5E2	Burkholderia sp. yr281
G0A8Y5	Collimonas fungivorans Ter331	A0A1H1JMZ9	Paraburkholderia fungorum
G0A8Y5	Collimonas fungivorans Ter331	A0A1H3DTM2	Collimonas sp. OK242
G0A8Y5	Collimonas fungivorans Ter331	A0A1H4GVH9	Paraburkholderia sartisoli
G0A8Y5	Collimonas fungivorans Ter331	A0A1H5N0T5	Burkholderia sp. WP9
G0A8Y5	Collimonas fungivorans Ter331	A0A1H6P905	Paraburkholderia hospita
G0A8Y5	Collimonas fungivorans Ter331	A0A1I0V5N7	Collimonas sp. OK607
G0A8Y5	Collimonas fungivorans Ter331	A0A1I1DMD5	Collimonas sp. OK412
G0A8Y5	Collimonas fungivorans Ter331	A0A1I3D7S5	Paraburkholderia megapolitana
G0A8Y5	Collimonas fungivorans Ter331	A0A1I5XHV8	Variovorax sp. 770b2
G0A8Y5	Collimonas fungivorans Ter331	A0A1I7E3X7	Paraburkholderia aspalathi
G0A8Y5	Collimonas fungivorans Ter331	A0A1L6HU09	Paraburkholderia sp. SOS3
G0A8Y5	Collimonas fungivorans Ter331	A0A1M6NGU4	Paraburkholderia terricola
G0A8Y5	Collimonas fungivorans Ter331	A0A1N6JWI6	Paraburkholderia phenazinium
G0A8Y5	Collimonas fungivorans Ter331	A0A1N6LU69	Burkholderia sp. GAS332
G0A8Y5	Collimonas fungivorans Ter331	A0A221A1I6	Burkholderia sp. AD24
G0A8Y5	Collimonas fungivorans Ter331	A0A226X911	Caballeronia sordidicola
G0A8Y5	Collimonas fungivorans Ter331	A0A239SM16	Pandoraea sputorum
G0A8Y5	Collimonas fungivorans Ter331	A0A248VTD1	Paraburkholderia aromaticivorans
G0A8Y5	Collimonas fungivorans Ter331	A0A286AQF7	Variovorax sp. YR752
G0A8Y5	Collimonas fungivorans Ter331	A0A2A4EN22	Pseudomonas acidophila
G0A8Y5	Collimonas fungivorans Ter331	A0A2A9KGJ8	Collimonas sp. PA-H2
G0A8Y5	Collimonas fungivorans Ter331	A0A2C9AZH5	Burkholderia sp. OK806
G0A8Y5	Collimonas fungivorans Ter331	A0A2C9B9U7	Burkholderia sp. D7
G0A8Y5	Collimonas fungivorans Ter331	A0A2C9BVR7	Burkholderia sp. OK233
G0A8Y5	Collimonas fungivorans Ter331	A0A2P8KF68	Variovorax sp. WS11
G0A8Y5	Collimonas fungivorans Ter331	A0A2S4M466	Paraburkholderia eburnea
G0A8Y5	Collimonas fungivorans Ter331	A0A2S8RLD9	Paraburkholderia sp. BL21I4N1
G0A8Y5	Collimonas fungivorans Ter331	A0A2T0KTY4	Paraburkholderia sp. BL18I3N2
G0A8Y5	Collimonas fungivorans Ter331	A0A2T0QKK2	Paraburkholderia sp. BL25I1N1
G0A8Y5	Collimonas fungivorans Ter331	A0A2U0WRJ7	Paraburkholderia sp. OV555
G0A8Y5	Collimonas fungivorans Ter331	A0A2U1ADZ8	Paraburkholderia silvatlantica
G0A8Y5	Collimonas fungivorans Ter331	A0A2U3IF63	Burkholderia novacaledonica
G0A8Y5	Collimonas fungivorans Ter331	A0A328XJ62	Paraburkholderia unamae
G0A8Y5	Collimonas fungivorans Ter331	A0A329BPS4	Paraburkholderia bryophila
G0A8Y5	Collimonas fungivorans Ter331	A0A346B609	Paraburkholderia caffeinilytica
G0A8Y5	Collimonas fungivorans Ter331	A0A365NR50	Herminiimonas fonticola
G0A8Y5	Collimonas fungivorans Ter331	A0A370NB10	Paraburkholderia sp. S27
G0A8Y5	Collimonas fungivorans Ter331	A0A378YXI3	Pandoraea pnomenusa
G0A8Y5	Collimonas fungivorans Ter331	A0A378Z2N1	Pandoraea pulmonicola
G0A8Y5	Collimonas fungivorans Ter331	B2T9D3	Paraburkholderia phytofirmans PsJN
G0A8Y5	Collimonas fungivorans Ter331	D5WNJ6	Burkholderia sp. CCGE1002
G0A8Y5	Collimonas fungivorans Ter331	E6V5A2	Variovorax paradoxus EPS
G0A8Y5	Collimonas fungivorans Ter331	G0A8Y5	Collimonas fungivorans Ter331
G0A8Y5	Collimonas fungivorans Ter331	I2IY77	Burkholderia sp. Ch1-1
G0A8Y5	Collimonas fungivorans Ter331	K8RD38	Burkholderia sp. SJ98
G0A8Y5	Collimonas fungivorans Ter331	R4X3R1	Burkholderia insecticola
G0A8Y5	Collimonas fungivorans Ter331	R7X0E5	Pandoraea sp. SD6-2
H1RYM1	Cupriavidus basilensis OR16	A0A069IKF9	Cupriavidus sp. SK-3
H1RYM1	Cupriavidus basilensis OR16	A0A0C4YNY0	Cupriavidus basilensis
H1RYM1	Cupriavidus basilensis OR16	A0A0M3SX32	Cupriavidus gilardii CR3
H1RYM1	Cupriavidus basilensis OR16	A0A132HTJ1	Cupriavidus metallidurans
H1RYM1	Cupriavidus basilensis OR16	A0A1G6UTI7	Cupriavidus sp. YR651
H1RYM1	Cupriavidus basilensis OR16	A0A2A4MFE4	Burkholderiaceae bacterium
H1RYM1	Cupriavidus basilensis OR16	H1RYM1	Cupriavidus basilensis OR16
H1RYM1	Cupriavidus basilensis OR16	L2E775	Cupriavidus sp. HMR-1
H1RYM1	Cupriavidus basilensis OR16	V2I8Z6	Cupriavidus sp. HPC(L)
I7G1A9	Mycolicibacterium smegmatis MC2 155	A0A0D6FY31	Mycolicibacterium smegmatis
I7G1A9	Mycolicibacterium smegmatis MC2 155	A0A0K0X2X4	Mycolicibacterium goodii
I7G1A9	Mycolicibacterium smegmatis MC2 155	A0A0T1W7C3	Mycobacterium sp. Root135
I7G1A9	Mycolicibacterium smegmatis MC2 155	A0A0X3SFA4	Streptomyces sp. NRRL F-5122
I7G1A9	Mycolicibacterium smegmatis MC2 155	A0A1A0KH23	Mycobacterium sp. 1100029.7
I7G1A9	Mycolicibacterium smegmatis MC2 155	A0A1A0WWR6	Mycobacterium sp. 852013-50091_SCH5140682
I7G1A9	Mycolicibacterium smegmatis MC2 155	A0A1A1YRC0	Mycobacterium sp. ACS1612
I7G1A9	Mycolicibacterium smegmatis MC2 155	A0A1A2GAS7	Mycobacterium sp. 852002-51057_SCH5723018
I7G1A9	Mycolicibacterium smegmatis MC2 155	A0A1E3STM3	Mycobacterium sherrisii
I7G1A9	Mycolicibacterium smegmatis MC2 155	A0A1Q4TK02	Mycobacterium sp. SWH-M5
I7G1A9	Mycolicibacterium smegmatis MC2 155	A0A1V4PKD0	Mycobacterium sp. AT1
I7G1A9	Mycolicibacterium smegmatis MC2 155	A0A1X0XWW8	Mycobacterium simiae
I7G1A9	Mycolicibacterium smegmatis MC2 155	A0A1X1TUG7	Mycobacterium florentinum
I7G1A9	Mycolicibacterium smegmatis MC2 155	A0A1X2C4B3	Mycobacterium saskatchewanense
I7G1A9	Mycolicibacterium smegmatis MC2 155	A0A2N5R3J7	Mycobacterium tuberculosis variant microti OV254
I7G1A9	Mycolicibacterium smegmatis MC2 155	A0A2R5GYJ6	Mycobacterium montefiorense
I7G1A9	Mycolicibacterium smegmatis MC2 155	A0A2U9PHI6	Mycolicibacterium smegmatis MKD8
I7G1A9	Mycolicibacterium smegmatis MC2 155	A0A370CNP1	Mycolicibacterium moriokaense
I7G1A9	Mycolicibacterium smegmatis MC2 155	A0QNT6	Mycolicibacterium smegmatis MC2 155
I7G1A9	Mycolicibacterium smegmatis MC2 155	I7G1A9	Mycolicibacterium smegmatis MC2 155
I7G1A9	Mycolicibacterium smegmatis MC2 155	L0IQW7	Mycobacterium sp. JS623
I7G1B5	Mycolicibacterium smegmatis MC2 155	A0A0D6FYE1	Mycolicibacterium smegmatis
I7G1B5	Mycolicibacterium smegmatis MC2 155	A0A0K0X2Y4	Mycolicibacterium goodii
I7G1B5	Mycolicibacterium smegmatis MC2 155	A0A0T1W895	Mycobacterium sp. Root135
I7G1B5	Mycolicibacterium smegmatis MC2 155	A0A1Q4TJZ2	Mycobacterium sp. SWH-M5
I7G1B5	Mycolicibacterium smegmatis MC2 155	A0A1V4PGT7	Mycobacterium sp. AT1
I7G1B5	Mycolicibacterium smegmatis MC2 155	A0A2M9FLB7	Mycolicibacterium goodii
I7G1B5	Mycolicibacterium smegmatis MC2 155	A0QNU6	Mycolicibacterium smegmatis MC2 155
I7G1B5	Mycolicibacterium smegmatis MC2 155	I7G1B5	Mycolicibacterium smegmatis MC2 155
K8WLE6	Providencia sneebia DSM 19967	A0A140NM80	Providencia stuartii MRSN 2154
K8WLE6	Providencia sneebia DSM 19967	A0A1B7JUB4	Providencia heimbachae ATCC 35613
K8WLE6	Providencia sneebia DSM 19967	A0A1B8SW58	Providencia rettgeri
K8WLE6	Providencia sneebia DSM 19967	A0A1J0EDS7	Providencia rettgeri
K8WLE6	Providencia sneebia DSM 19967	A0A1S1HMB9	Providencia stuartii
K8WLE6	Providencia sneebia DSM 19967	A0A264VRC3	Providencia rettgeri
K8WLE6	Providencia sneebia DSM 19967	A0A2A5Q8I3	Providencia rettgeri
K8WLE6	Providencia sneebia DSM 19967	A0A2U9L456	Providencia rettgeri
K8WLE6	Providencia sneebia DSM 19967	A0A335E7J9	Acinetobacter baumannii
K8WLE6	Providencia sneebia DSM 19967	A0A345LZB3	Providencia sp. WCHPr000369
K8WLE6	Providencia sneebia DSM 19967	A0A379FYC6	Providencia rettgeri
K8WLE6	Providencia sneebia DSM 19967	B2PV55	Providencia stuartii ATCC 25827
K8WLE6	Providencia sneebia DSM 19967	D4C5P9	Providencia rettgeri DSM 1131
K8WLE6	Providencia sneebia DSM 19967	K8WLE6	Providencia sneebia DSM 19967
L7F1F2	Streptomyces turgidiscabies Car8	A0A0F5VJT7	Streptomyces sp. WM6386
L7F1F2	Streptomyces turgidiscabies Car8	A0A0Q6XZA5	Streptomyces sp. Root369
L7F1F2	Streptomyces turgidiscabies Car8	A0A101NU97	Streptomyces canus
L7F1F2	Streptomyces turgidiscabies Car8	A0A101RJM4	Streptomyces canus
L7F1F2	Streptomyces turgidiscabies Car8	A0A124H8B2	Streptomyces pseudovenezuelae
L7F1F2	Streptomyces turgidiscabies Car8	A0A1V4E137	Streptomyces sp. GKU 895
L7F1F2	Streptomyces turgidiscabies Car8	A0A243RZL6	Streptomyces swartbergensis
L7F1F2	Streptomyces turgidiscabies Car8	A0A285CBZ7	Streptomyces sp. TLI_55
L7F1F2	Streptomyces turgidiscabies Car8	A0A285CCN5	Streptomyces sp. TLI_55
L7F1F2	Streptomyces turgidiscabies Car8	A0A2U2ZPN2	Streptomyces sp. Act143
L7F1F2	Streptomyces turgidiscabies Car8	B5I857	Streptomyces sviceus ATCC 29083
L7F1F2	Streptomyces turgidiscabies Car8	B5I862	Streptomyces sviceus ATCC 29083
L7F1F2	Streptomyces turgidiscabies Car8	L7EZX8	Streptomyces turgidiscabies Car8
L7F1F2	Streptomyces turgidiscabies Car8	L7F1F2	Streptomyces turgidiscabies Car8
M1STY5	beta proteobacterium CB	A0A258BAQ1	Polynucleobacter sp. 32-46-5
M1STY5	beta proteobacterium CB	M1STY5	beta proteobacterium CB
R5AR18	Prevotella sp. CAG:1031	A0A1Q6EIZ9	Bacteroidales bacterium 52_46
R5AR18	Prevotella sp. CAG:1031	R5AR18	Prevotella sp. CAG:1031
R9KTQ7	Enterorhabdus caecimuris B7	R9KTQ7	Enterorhabdus caecimuris B7
S3AWX8	Streptomyces sp. HPH0547	A0A0N1KBM7	Streptomyces sp. NRRL F-6602
S3AWX8	Streptomyces sp. HPH0547	S3AWX8	Streptomyces sp. HPH0547
V4RKX8	Lutibaculum baratangense AMV1	V4RKX8	Lutibaculum baratangense AMV1
W7SSX0	Kutzneria sp. 744	W7SSX0	Kutzneria sp. 744

## Sheet: oxc
centroid	centroid_taxa	member	member_taxa
A0A016XHL7	Hylemonella gracilis str. Niagara R	A0A016XHL7	Hylemonella gracilis str. Niagara R
A0A016XHL7	Hylemonella gracilis str. Niagara R	A0A353Y204	Curvibacter sp.
A0A016XHL7	Hylemonella gracilis str. Niagara R	F3KVX4	Hylemonella gracilis ATCC 19624
A0A022GFT8	Cupriavidus sp. SK-4	A0A022GFT8	Cupriavidus sp. SK-4
A0A022GFT8	Cupriavidus sp. SK-4	A0A0F0FVU1	Burkholderiaceae bacterium 16
A0A022GFT8	Cupriavidus sp. SK-4	A0A142JSL1	Cupriavidus nantongensis
A0A022GFT8	Cupriavidus sp. SK-4	A0A1E4QWZ4	Cupriavidus sp. UYMMa02A
A0A022GFT8	Cupriavidus sp. SK-4	A0A1G6UUE3	Cupriavidus sp. YR651
A0A022GFT8	Cupriavidus sp. SK-4	A0A1H0QPB2	Ralstonia sp. 25mfcol4.1
A0A022GFT8	Cupriavidus sp. SK-4	A0A1I1QMA2	Cupriavidus sp. OV038
A0A022GFT8	Cupriavidus sp. SK-4	A0A1K0JQG6	Cupriavidus necator
A0A022GFT8	Cupriavidus sp. SK-4	A0A1U9UZL9	Cupriavidus sp. GA3-3
A0A022GFT8	Cupriavidus sp. SK-4	A0A2N5CA95	Cupriavidus pauculus
A0A022GFT8	Cupriavidus sp. SK-4	A0A2W7PGU6	Cupriavidus alkaliphilus
A0A022GFT8	Cupriavidus sp. SK-4	A0A316FCX2	Cupriavidus plantarum
A0A022GFT8	Cupriavidus sp. SK-4	A0A329ASR5	Cupriavidus alkaliphilus
A0A022GFT8	Cupriavidus sp. SK-4	A0A367PK28	Cupriavidus necator
A0A022GFT8	Cupriavidus sp. SK-4	A0A370NN98	Cupriavidus sp. S23
A0A022GFT8	Cupriavidus sp. SK-4	A0A375CBX8	Cupriavidus taiwanensis
A0A022GFT8	Cupriavidus sp. SK-4	A0A375CEW2	Cupriavidus taiwanensis
A0A022GFT8	Cupriavidus sp. SK-4	A0A375CIK2	Cupriavidus taiwanensis
A0A022GFT8	Cupriavidus sp. SK-4	A0A375D8B3	Cupriavidus taiwanensis
A0A022GFT8	Cupriavidus sp. SK-4	A0A375DKU8	Cupriavidus taiwanensis
A0A022GFT8	Cupriavidus sp. SK-4	A0A375E905	Cupriavidus taiwanensis
A0A022GFT8	Cupriavidus sp. SK-4	A0A375EX33	Cupriavidus taiwanensis
A0A022GFT8	Cupriavidus sp. SK-4	A0A375FAM0	Cupriavidus taiwanensis
A0A022GFT8	Cupriavidus sp. SK-4	A0A375G7A4	Cupriavidus taiwanensis
A0A022GFT8	Cupriavidus sp. SK-4	A0A375GQ18	Cupriavidus oxalaticus
A0A022GFT8	Cupriavidus sp. SK-4	A0A375HRJ1	Cupriavidus taiwanensis
A0A022GFT8	Cupriavidus sp. SK-4	A0A375II85	Cupriavidus taiwanensis
A0A022GFT8	Cupriavidus sp. SK-4	A0A375J8X2	Cupriavidus taiwanensis
A0A022GFT8	Cupriavidus sp. SK-4	B3RB30	Cupriavidus taiwanensis LMG 19424
A0A022GFT8	Cupriavidus sp. SK-4	F8GQ86	Cupriavidus necator N-1
A0A022GFT8	Cupriavidus sp. SK-4	Q0K0H7	Cupriavidus necator H16
A0A022GFT8	Cupriavidus sp. SK-4	Q46S71	Cupriavidus pinatubonensis JMP134
A0A022GFT8	Cupriavidus sp. SK-4	U3R1R4	Ralstonia pickettii DTP0602
A0A023XI95	Bradyrhizobium japonicum SEMIA 5079	A0A023XI95	Bradyrhizobium japonicum SEMIA 5079
A0A023XI95	Bradyrhizobium japonicum SEMIA 5079	A0A0A3XZY4	Bradyrhizobium japonicum
A0A023XI95	Bradyrhizobium japonicum SEMIA 5079	A0A0D1LGL4	Bradyrhizobium elkanii
A0A023XI95	Bradyrhizobium japonicum SEMIA 5079	A0A0D7NWQ0	Bradyrhizobium sp. LTSP885
A0A023XI95	Bradyrhizobium japonicum SEMIA 5079	A0A0D7PD85	Bradyrhizobium sp. LTSP849
A0A023XI95	Bradyrhizobium japonicum SEMIA 5079	A0A0D7Q1U8	Bradyrhizobium sp. LTSPM299
A0A023XI95	Bradyrhizobium japonicum SEMIA 5079	A0A0E4BUM5	Bradyrhizobium diazoefficiens
A0A023XI95	Bradyrhizobium japonicum SEMIA 5079	A0A0M9BE66	Bradyrhizobium japonicum
A0A023XI95	Bradyrhizobium japonicum SEMIA 5079	A0A0Q5YQW4	Bradyrhizobium sp. Leaf396
A0A023XI95	Bradyrhizobium japonicum SEMIA 5079	A0A0R3BXP9	Bradyrhizobium pachyrhizi
A0A023XI95	Bradyrhizobium japonicum SEMIA 5079	A0A0R3C217	Bradyrhizobium yuanmingense
A0A023XI95	Bradyrhizobium japonicum SEMIA 5079	A0A0R3E4T4	Bradyrhizobium manausense
A0A023XI95	Bradyrhizobium japonicum SEMIA 5079	A0A0R3KAD2	Bradyrhizobium valentinum
A0A023XI95	Bradyrhizobium japonicum SEMIA 5079	A0A0R3LE94	Bradyrhizobium jicamae
A0A023XI95	Bradyrhizobium japonicum SEMIA 5079	A0A0R3MFP9	Bradyrhizobium lablabi
A0A023XI95	Bradyrhizobium japonicum SEMIA 5079	A0A0S6UPB1	Bradyrhizobium sp. DOA9
A0A023XI95	Bradyrhizobium japonicum SEMIA 5079	A0A109K0Z4	Bradyrhizobium sp. BR 10303
A0A023XI95	Bradyrhizobium japonicum SEMIA 5079	A0A120HN32	Bradyrhizobium sp. CCGE-LA001
A0A023XI95	Bradyrhizobium japonicum SEMIA 5079	A0A150U9X9	Bradyrhizobium sp. AT1
A0A023XI95	Bradyrhizobium japonicum SEMIA 5079	A0A151FEV0	Bradyrhizobium liaoningense
A0A023XI95	Bradyrhizobium japonicum SEMIA 5079	A0A160U9B2	Bradyrhizobium sp.
A0A023XI95	Bradyrhizobium japonicum SEMIA 5079	A0A160V1B6	Bradyrhizobium sp. G22
A0A023XI95	Bradyrhizobium japonicum SEMIA 5079	A0A176YSS3	Bradyrhizobium neotropicale
A0A023XI95	Bradyrhizobium japonicum SEMIA 5079	A0A176YTG3	Bradyrhizobium sp. BR 10245
A0A023XI95	Bradyrhizobium japonicum SEMIA 5079	A0A1B1URV3	Bradyrhizobium icense
A0A023XI95	Bradyrhizobium japonicum SEMIA 5079	A0A1B9ZBV4	Bradyrhizobium paxllaeri
A0A023XI95	Bradyrhizobium japonicum SEMIA 5079	A0A1C3TUW5	Bradyrhizobium yuanmingense
A0A023XI95	Bradyrhizobium japonicum SEMIA 5079	A0A1C3U7P4	Bradyrhizobium shewense
A0A023XI95	Bradyrhizobium japonicum SEMIA 5079	A0A1E3EGE6	Bradyrhizobium elkanii
A0A023XI95	Bradyrhizobium japonicum SEMIA 5079	A0A1G6MDK2	Bradyrhizobium sp. R5
A0A023XI95	Bradyrhizobium japonicum SEMIA 5079	A0A1G8LXW7	Bradyrhizobium sp. Rc2d
A0A023XI95	Bradyrhizobium japonicum SEMIA 5079	A0A1H0QZN9	Afipia sp. GAS231
A0A023XI95	Bradyrhizobium japonicum SEMIA 5079	A0A1H5J0P2	Bradyrhizobium erythrophlei
A0A023XI95	Bradyrhizobium japonicum SEMIA 5079	A0A1H7YX33	Bradyrhizobium sp. OK095
A0A023XI95	Bradyrhizobium japonicum SEMIA 5079	A0A1I3CDG7	Bradyrhizobium sp. Gha
A0A023XI95	Bradyrhizobium japonicum SEMIA 5079	A0A1I3R6M0	Bradyrhizobium sp. cf659
A0A023XI95	Bradyrhizobium japonicum SEMIA 5079	A0A1I4V676	Bradyrhizobium sp. Rc3b
A0A023XI95	Bradyrhizobium japonicum SEMIA 5079	A0A1I5MPX0	Bradyrhizobium sp. Ghvi
A0A023XI95	Bradyrhizobium japonicum SEMIA 5079	A0A1I7LID0	Bradyrhizobium arachidis
A0A023XI95	Bradyrhizobium japonicum SEMIA 5079	A0A1L3FJB7	Bradyrhizobium japonicum
A0A023XI95	Bradyrhizobium japonicum SEMIA 5079	A0A1Q5RQS0	Bradyrhizobium sp. NAS96.2
A0A023XI95	Bradyrhizobium japonicum SEMIA 5079	A0A1Q5S670	Bradyrhizobium sp. NAS80.1
A0A023XI95	Bradyrhizobium japonicum SEMIA 5079	A0A1Q5SGX6	Bradyrhizobium sp. AS23.2
A0A023XI95	Bradyrhizobium japonicum SEMIA 5079	A0A1S2SIJ7	Bradyrhizobium elkanii
A0A023XI95	Bradyrhizobium japonicum SEMIA 5079	A0A1V5ET00	Bradyrhizobium sp. BR10280
A0A023XI95	Bradyrhizobium japonicum SEMIA 5079	A0A1X3FB34	Bradyrhizobium canariense
A0A023XI95	Bradyrhizobium japonicum SEMIA 5079	A0A1Y2JQ20	Bradyrhizobium japonicum
A0A023XI95	Bradyrhizobium japonicum SEMIA 5079	A0A1Y6KES6	Bradyrhizobium sp. ORS 285
A0A023XI95	Bradyrhizobium japonicum SEMIA 5079	A0A2A2VCX8	Bradyrhizobium sp. UFLA03-84
A0A023XI95	Bradyrhizobium japonicum SEMIA 5079	A0A2A6N805	Bradyrhizobium diazoefficiens
A0A023XI95	Bradyrhizobium japonicum SEMIA 5079	A0A2A6NYH9	Bradyrhizobium sp. C9
A0A023XI95	Bradyrhizobium japonicum SEMIA 5079	A0A2A6PVN4	Bradyrhizobium sp. Y36
A0A023XI95	Bradyrhizobium japonicum SEMIA 5079	A0A2K8YQ06	Bradyrhizobium sp. SK17
A0A023XI95	Bradyrhizobium japonicum SEMIA 5079	A0A2M6U9X0	Bradyrhizobium sp. TSA1
A0A023XI95	Bradyrhizobium japonicum SEMIA 5079	A0A2M8RHB9	Bradyrhizobium sp. INPA54B
A0A023XI95	Bradyrhizobium japonicum SEMIA 5079	A0A2S6MG56	Bradyrhizobium sp. AC87j1
A0A023XI95	Bradyrhizobium japonicum SEMIA 5079	A0A2T0PEF4	Rhizobium tropici
A0A023XI95	Bradyrhizobium japonicum SEMIA 5079	A0A2T2Q0X0	Bradyrhizobium sp. MOS003
A0A023XI95	Bradyrhizobium japonicum SEMIA 5079	A0A2T2QN33	Bradyrhizobium sp. MOS002
A0A023XI95	Bradyrhizobium japonicum SEMIA 5079	A0A2U3Q4W8	Bradyrhizobium sp. ORS 3257
A0A023XI95	Bradyrhizobium japonicum SEMIA 5079	A0A2U8PI89	Bradyrhizobium ottawaense
A0A023XI95	Bradyrhizobium japonicum SEMIA 5079	A0A2U8PRK5	Bradyrhizobium sp. 2 39S1MB
A0A023XI95	Bradyrhizobium japonicum SEMIA 5079	A0A2U8Q9J0	Bradyrhizobium sp. 3 85S1MB
A0A023XI95	Bradyrhizobium japonicum SEMIA 5079	A0A348QNQ1	Bradyrhizobium sp.
A0A023XI95	Bradyrhizobium japonicum SEMIA 5079	A4YXN1	Bradyrhizobium sp. ORS 278
A0A023XI95	Bradyrhizobium japonicum SEMIA 5079	A5EGD8	Bradyrhizobium sp. BTAi1
A0A023XI95	Bradyrhizobium japonicum SEMIA 5079	G7DRV0	Bradyrhizobium japonicum USDA 6
A0A023XI95	Bradyrhizobium japonicum SEMIA 5079	H0SDJ3	Bradyrhizobium sp. ORS 375
A0A023XI95	Bradyrhizobium japonicum SEMIA 5079	H0T3B8	Bradyrhizobium sp. STM 3809
A0A023XI95	Bradyrhizobium japonicum SEMIA 5079	I0GB98	Bradyrhizobium sp. S23321
A0A023XI95	Bradyrhizobium japonicum SEMIA 5079	I2QC24	Bradyrhizobium sp. WSM1253
A0A023XI95	Bradyrhizobium japonicum SEMIA 5079	J3CW21	Bradyrhizobium sp. YR681
A0A023XI95	Bradyrhizobium japonicum SEMIA 5079	M4Z6F4	Bradyrhizobium oligotrophicum S58
A0A023XI95	Bradyrhizobium japonicum SEMIA 5079	Q89QH1	Bradyrhizobium diazoefficiens USDA 110
A0A059IP13	Defluviimonas sp. 20V17	A0A059IP13	Defluviimonas sp. 20V17
A0A060QGQ1	Asaia platycodi SF2.1	A0A060QGQ1	Asaia platycodi SF2.1
A0A060QGQ1	Asaia platycodi SF2.1	A0A0P0YIP1	Asaia bogorensis NBRC 16594
A0A062XEM5	Lactobacillus animalis	A0A062XEM5	Lactobacillus animalis
A0A062XEM5	Lactobacillus animalis	A0A087QB10	Lactobacillus gasseri SV-16A-US
A0A062XEM5	Lactobacillus animalis	A0A0R2DLY9	Lactobacillus taiwanensis DSM 21401
A0A062XEM5	Lactobacillus animalis	A0A133PDY8	Lactobacillus gasseri
A0A062XEM5	Lactobacillus animalis	A0A137PJU1	Lactobacillus johnsonii
A0A062XEM5	Lactobacillus animalis	A0A1B3PV83	Lactobacillus johnsonii
A0A062XEM5	Lactobacillus animalis	A0A244CIU3	Lactobacillus johnsonii
A0A062XEM5	Lactobacillus animalis	A0A249NKW3	Lactobacillus gasseri DSM 14869
A0A062XEM5	Lactobacillus animalis	A0A2Z6C002	Lactobacillus gasseri
A0A062XEM5	Lactobacillus animalis	A0A346MSX6	Lactobacillus johnsonii
A0A062XEM5	Lactobacillus animalis	D1YL54	Lactobacillus gasseri 224-1
A0A062XEM5	Lactobacillus animalis	I7JUF1	Lactobacillus hominis DSM 23910 = CRBIP 24.179
A0A071LNA8	Mangrovibacter sp. MFB070	A0A071LNA8	Mangrovibacter sp. MFB070
A0A071LNA8	Mangrovibacter sp. MFB070	A0A2D1K059	Dickeya dianthicola RNS04.9
A0A071LNA8	Mangrovibacter sp. MFB070	A0A2K8QHH1	Dickeya fangzhongdai
A0A071LNA8	Mangrovibacter sp. MFB070	A0A2K9QA81	Dickeya zeae
A0A071LNA8	Mangrovibacter sp. MFB070	A0A318FQL5	Erwinia sp. AG740
A0A071LNA8	Mangrovibacter sp. MFB070	C6C980	Dickeya paradisiaca Ech703
A0A071LNA8	Mangrovibacter sp. MFB070	E0SNC8	Dickeya dadantii 3937
A0A073K3Y6	Lactobacillus reuteri	A0A073K3Y6	Lactobacillus reuteri
A0A073K3Y6	Lactobacillus reuteri	A0A081NMZ7	Lactobacillus reuteri
A0A073K3Y6	Lactobacillus reuteri	A0A0S4NRE1	Lactobacillus reuteri ATCC 53608
A0A073K3Y6	Lactobacillus reuteri	A0A1C1ZPP4	Lactobacillus reuteri
A0A073K3Y6	Lactobacillus reuteri	A0A1C2GEA2	Lactobacillus reuteri
A0A073K3Y6	Lactobacillus reuteri	A0A1V4FMN5	Lactobacillus reuteri
A0A073K3Y6	Lactobacillus reuteri	A0A1X8V7N6	Lactobacillus reuteri
A0A073K3Y6	Lactobacillus reuteri	A0A1Y2UIZ6	Lactobacillus reuteri
A0A073K3Y6	Lactobacillus reuteri	A0A244CI56	Lactobacillus reuteri
A0A073K3Y6	Lactobacillus reuteri	A0A256SJU1	Lactobacillus reuteri
A0A073K3Y6	Lactobacillus reuteri	A0A256VCT7	Lactobacillus reuteri
A0A073K3Y6	Lactobacillus reuteri	A0A256VKS5	Lactobacillus reuteri
A0A073K3Y6	Lactobacillus reuteri	A0A2R7DPU3	Lactobacillus reuteri
A0A073K3Y6	Lactobacillus reuteri	A0A317GAJ7	Lactobacillus reuteri
A0A073K3Y6	Lactobacillus reuteri	A0A347T7D5	Lactobacillus reuteri
A0A085GUA7	Hafnia alvei ATCC 13337	A0A085GUA7	Hafnia alvei ATCC 13337
A0A085GUA7	Hafnia alvei ATCC 13337	A0A097R1J2	Hafnia alvei FB1
A0A085GUA7	Hafnia alvei ATCC 13337	A0A2J9H2S0	Hafnia alvei
A0A085GUA7	Hafnia alvei ATCC 13337	A0A377P3J0	Hafnia alvei
A0A0A0HME1	Roseovarius mucosus DSM 17069	A0A0A0HME1	Roseovarius mucosus DSM 17069
A0A0A0HME1	Roseovarius mucosus DSM 17069	A0A0F2S3K0	Roseovarius sp. BRH_c41
A0A0A0HME1	Roseovarius mucosus DSM 17069	A0A1V0RL50	Roseovarius mucosus
A0A0A0HME1	Roseovarius mucosus DSM 17069	A0A1V1UBZ7	Roseovarius sp. A-2
A0A0A0HME1	Roseovarius mucosus DSM 17069	A0A2D9AEI1	Roseovarius sp.
A0A0A0HME1	Roseovarius mucosus DSM 17069	A0A2N3ETT3	Alphaproteobacteria bacterium HGW-Alphaproteobacte
A0A0B6S427	Burkholderia glumae PG1	A0A0B6S427	Burkholderia glumae PG1
A0A0B6S427	Burkholderia glumae PG1	A0A0P0L8A8	Burkholderia plantarii
A0A0D2SYE3	Skermanella aerolata KACC 11604	A0A060DM20	Azospirillum brasilense
A0A0D2SYE3	Skermanella aerolata KACC 11604	A0A0D2SYE3	Skermanella aerolata KACC 11604
A0A0D2SYE3	Skermanella aerolata KACC 11604	A0A0F2KMT7	Azospirillum thiophilum
A0A0D2SYE3	Skermanella aerolata KACC 11604	A0A0P0F5Y9	Azospirillum brasilense
A0A0D2SYE3	Skermanella aerolata KACC 11604	A0A0P0FDL2	Azospirillum brasilense
A0A0D2SYE3	Skermanella aerolata KACC 11604	A0A1X7EEC2	Azospirillum oryzae
A0A0D2SYE3	Skermanella aerolata KACC 11604	A0A1X7PA76	Azospirillum lipoferum
A0A0D2SYE3	Skermanella aerolata KACC 11604	A0A2S1XEU7	Azospirillum sp. TSH58
A0A0D2SYE3	Skermanella aerolata KACC 11604	A0A2S1XNB1	Azospirillum sp. TSH58
A0A0D2SYE3	Skermanella aerolata KACC 11604	A0A2U1VAJ4	Azospirillum sp. TSO22-1
A0A0D2SYE3	Skermanella aerolata KACC 11604	A0A2U1VFW2	Azospirillum sp. TSO35-2
A0A0D2SYE3	Skermanella aerolata KACC 11604	A0A2U1W6C7	Azospirillum sp. TSA6c
A0A0D2SYE3	Skermanella aerolata KACC 11604	A0A2U1WZ25	Azospirillum sp. TSH20
A0A0D2SYE3	Skermanella aerolata KACC 11604	A0A2U1XE30	Azospirillum sp. TSH100
A0A0D2SYE3	Skermanella aerolata KACC 11604	A0A2U1XSS4	Azospirillum sp. TSH64
A0A0D2SYE3	Skermanella aerolata KACC 11604	A0A2U1Y453	Azospirillum sp. TSO5
A0A0D2SYE3	Skermanella aerolata KACC 11604	A0A2U9S950	Azospirillum sp. M2T2B2
A0A0D2SYE3	Skermanella aerolata KACC 11604	D3NZQ4	Azospirillum sp. B510
A0A0D2SYE3	Skermanella aerolata KACC 11604	G7ZBD0	Azospirillum lipoferum 4B
A0A0D2SYE3	Skermanella aerolata KACC 11604	W9H348	Skermanella stibiiresistens SB22
A0A0D4CLN5	Lactobacillus mucosae LM1	A0A0D4CLN5	Lactobacillus mucosae LM1
A0A0D4CLN5	Lactobacillus mucosae LM1	A0A0R1PAF9	Lactobacillus mucosae DSM 13345
A0A0D7F402	Rhodopseudomonas palustris	A0A0D7F402	Rhodopseudomonas palustris
A0A0F0FTK8	Burkholderiaceae bacterium 16	A0A0F0F9Z5	Burkholderiaceae bacterium 16
A0A0F0FTK8	Burkholderiaceae bacterium 16	A0A0F0FTK8	Burkholderiaceae bacterium 16
A0A0F9LRR5	marine sediment metagenome	A0A0F9LRR5	marine sediment metagenome
A0A0G4JI28	Pandoraea apista	A0A069PCR9	Caballeronia glathei
A0A0G4JI28	Pandoraea apista	A0A0B3T878	Pandoraea pnomenusa
A0A0G4JI28	Pandoraea apista	A0A0C5JWB3	Pandoraea vervacti
A0A0G4JI28	Pandoraea apista	A0A0E3U978	Pandoraea oxalativorans
A0A0G4JI28	Pandoraea apista	A0A0G4JI28	Pandoraea apista
A0A0G4JI28	Pandoraea apista	A0A0H3WZB7	Pandoraea faecigallinarum
A0A0G4JI28	Pandoraea apista	A0A0J1D0I9	Caballeronia mineralivorans PML1(12)
A0A0G4JI28	Pandoraea apista	A0A0N0ZIN1	Burkholderia sp. ST111
A0A0G4JI28	Pandoraea apista	A0A0P0RFH3	Paraburkholderia caribensis MBA4
A0A0G4JI28	Pandoraea apista	A0A0Q5NVL1	Burkholderia sp. Leaf177
A0A0G4JI28	Pandoraea apista	A0A0U2Y8V2	Pandoraea norimbergensis
A0A0G4JI28	Pandoraea apista	A0A125SMV1	Burkholderia sp. PAMC 26561
A0A0G4JI28	Pandoraea apista	A0A142Z0M9	Paraburkholderia caribensis
A0A0G4JI28	Pandoraea apista	A0A158B943	Caballeronia arationis
A0A0G4JI28	Pandoraea apista	A0A158FLF8	Caballeronia udeis
A0A0G4JI28	Pandoraea apista	A0A158GRC0	Caballeronia telluris
A0A0G4JI28	Pandoraea apista	A0A158GSL7	Caballeronia sordidicola
A0A0G4JI28	Pandoraea apista	A0A1A5X5F9	Paraburkholderia tropica
A0A0G4JI28	Pandoraea apista	A0A1E3LF21	Pandoraea sp. ISTKB
A0A0G4JI28	Pandoraea apista	A0A1G8C5F2	Burkholderia sp. yr281
A0A0G4JI28	Pandoraea apista	A0A1H3DTJ2	Collimonas sp. OK242
A0A0G4JI28	Pandoraea apista	A0A1H5N089	Burkholderia sp. WP9
A0A0G4JI28	Pandoraea apista	A0A1H6PMF5	Paraburkholderia hospita
A0A0G4JI28	Pandoraea apista	A0A1H7C8Z2	Paraburkholderia tropica
A0A0G4JI28	Pandoraea apista	A0A1H7K051	Paraburkholderia caballeronis
A0A0G4JI28	Pandoraea apista	A0A1I3D7T1	Paraburkholderia megapolitana
A0A0G4JI28	Pandoraea apista	A0A1I7E3Y4	Paraburkholderia aspalathi
A0A0G4JI28	Pandoraea apista	A0A1N6LU61	Burkholderia sp. GAS332
A0A0G4JI28	Pandoraea apista	A0A1Q4CFQ4	Pandoraea sp. 64-18
A0A0G4JI28	Pandoraea apista	A0A1S2N540	Massilia timonae
A0A0G4JI28	Pandoraea apista	A0A226X950	Caballeronia sordidicola
A0A0G4JI28	Pandoraea apista	A0A231UBM0	Pandoraea apista
A0A0G4JI28	Pandoraea apista	A0A239SM08	Pandoraea sputorum
A0A0G4JI28	Pandoraea apista	A0A242MPH7	Caballeronia sordidicola
A0A0G4JI28	Pandoraea apista	A0A248VTT0	Paraburkholderia aromaticivorans
A0A0G4JI28	Pandoraea apista	A0A2A4EPJ2	Pseudomonas acidophila
A0A0G4JI28	Pandoraea apista	A0A2C9AZR0	Burkholderia sp. OK806
A0A0G4JI28	Pandoraea apista	A0A2C9BA61	Burkholderia sp. D7
A0A0G4JI28	Pandoraea apista	A0A2C9BW16	Burkholderia sp. OK233
A0A0G4JI28	Pandoraea apista	A0A2S2DF89	Massilia oculi
A0A0G4JI28	Pandoraea apista	A0A2U0WRI7	Paraburkholderia sp. OV555
A0A0G4JI28	Pandoraea apista	A0A2V4RDR5	Pseudomonas syringae pv. pisi
A0A0G4JI28	Pandoraea apista	A0A2V4TV72	Paraburkholderia silvatlantica
A0A0G4JI28	Pandoraea apista	A0A2W7FIM4	Paraburkholderia sp. PDC91
A0A0G4JI28	Pandoraea apista	A0A370NAT0	Paraburkholderia sp. S27
A0A0G4JI28	Pandoraea apista	A0A378YWH6	Pandoraea pnomenusa
A0A0G4JI28	Pandoraea apista	A0A378Z0G2	Pandoraea pulmonicola
A0A0G4JI28	Pandoraea apista	I2IY78	Burkholderia sp. Ch1-1
A0A0G4JI28	Pandoraea apista	K9D9U3	Massilia timonae CCUG 45783
A0A0G4JI28	Pandoraea apista	Q13RQ3	Paraburkholderia xenovorans LB400
A0A0G4JI28	Pandoraea apista	R7X0D1	Pandoraea sp. SD6-2
A0A0H2LQ35	Variovorax paradoxus	A0A0D0K726	Variovorax paradoxus
A0A0H2LQ35	Variovorax paradoxus	A0A0H2LQ35	Variovorax paradoxus
A0A0H2LQ35	Variovorax paradoxus	A0A0P9BXJ3	Variovorax paradoxus
A0A0H2LQ35	Variovorax paradoxus	A0A0Q6MY37	Variovorax sp. Root318D1
A0A0H2LQ35	Variovorax paradoxus	A0A0Q7BT06	Variovorax sp. Root411
A0A0H2LQ35	Variovorax paradoxus	A0A0Q7H7K8	Variovorax sp. Root434
A0A0H2LQ35	Variovorax paradoxus	A0A109CEK3	Variovorax sp. WDL1
A0A0H2LQ35	Variovorax paradoxus	A0A1G6XB84	Variovorax sp. CF079
A0A0H2LQ35	Variovorax paradoxus	A0A1G8J179	Variovorax sp. OV700
A0A0H2LQ35	Variovorax paradoxus	A0A1H7W127	Variovorax sp. YR750
A0A0H2LQ35	Variovorax paradoxus	A0A1I4UD57	Variovorax sp. OV329
A0A0H2LQ35	Variovorax paradoxus	A0A1I5M7P5	Variovorax sp. PDC80
A0A0H2LQ35	Variovorax paradoxus	A0A1I5XIP1	Variovorax sp. 770b2
A0A0H2LQ35	Variovorax paradoxus	A0A1I7GWN9	Polaromonas sp. YR568
A0A0H2LQ35	Variovorax paradoxus	A0A244EH01	Variovorax sp. JS1663
A0A0H2LQ35	Variovorax paradoxus	A0A258U7V5	Polaromonas sp. 28-63-22
A0A0H2LQ35	Variovorax paradoxus	A0A286AQG8	Variovorax sp. YR752
A0A0H2LQ35	Variovorax paradoxus	A0A2E9BZZ1	Variovorax sp.
A0A0H2LQ35	Variovorax paradoxus	A0A2P8KF79	Variovorax sp. WS11
A0A0H2LQ35	Variovorax paradoxus	C5CK47	Variovorax paradoxus S110
A0A0H2LQ35	Variovorax paradoxus	E6V5A3	Variovorax paradoxus EPS
A0A0H2LQ35	Variovorax paradoxus	H5WKK2	Burkholderiales bacterium JOSHI_001
A0A0H2LQ35	Variovorax paradoxus	J2TGC9	Variovorax sp. CF313
A0A0H2LQ35	Variovorax paradoxus	T1XGQ0	Variovorax paradoxus B4
A0A0J9H0B8	Candidatus Rhodobacter lobularis	A0A0J9H0B8	Candidatus Rhodobacter lobularis
A0A0K0X5Y8	Mycolicibacterium goodii	A0A0D6IXK6	Mycolicibacterium smegmatis
A0A0K0X5Y8	Mycolicibacterium goodii	A0A0K0X5Y8	Mycolicibacterium goodii
A0A0K0X5Y8	Mycolicibacterium goodii	A0A1Q4T101	Mycobacterium sp. SWH-M5
A0A0K0X5Y8	Mycolicibacterium goodii	A0A2M9FLT6	Mycolicibacterium goodii
A0A0K0X5Y8	Mycolicibacterium goodii	A0A2U9PWN7	Mycolicibacterium smegmatis MKD8
A0A0K0X5Y8	Mycolicibacterium goodii	A0R305	Mycolicibacterium smegmatis MC2 155
A0A0K0X5Y8	Mycolicibacterium goodii	I7FRZ0	Mycolicibacterium smegmatis MC2 155
A0A0L0ALP9	Klebsiella sp. RIT-PI-d	A0A0L0ALP9	Klebsiella sp. RIT-PI-d
A0A0L7BLA2	Bifidobacterium animalis subsp. animalis MCC 0483	A0A087ADU3	Bifidobacterium choerinum
A0A0L7BLA2	Bifidobacterium animalis subsp. animalis MCC 0483	A0A087B560	Bifidobacterium cuniculi
A0A0L7BLA2	Bifidobacterium animalis subsp. animalis MCC 0483	A0A0A7IC61	Bifidobacterium pseudolongum PV8-2
A0A0L7BLA2	Bifidobacterium animalis subsp. animalis MCC 0483	A0A0L7BLA2	Bifidobacterium animalis subsp. animalis MCC 0483
A0A0L7BLA2	Bifidobacterium animalis subsp. animalis MCC 0483	A0A0L7CWW3	Bifidobacterium animalis subsp. animalis MCC 1489
A0A0L7BLA2	Bifidobacterium animalis subsp. animalis MCC 0483	A0A1C7FTH4	Bifidobacterium animalis subsp. animalis
A0A0L7BLA2	Bifidobacterium animalis subsp. animalis MCC 0483	A0A2A2EHW2	Bifidobacterium criceti
A0A0L7BLA2	Bifidobacterium animalis subsp. animalis MCC 0483	A0A2A2EJA6	Bifidobacterium italicum
A0A0L7BLA2	Bifidobacterium animalis subsp. animalis MCC 0483	A0A2D3D409	Bifidobacterium choerinum
A0A0L7BLA2	Bifidobacterium animalis subsp. animalis MCC 0483	A0A2N3QQA8	Bifidobacterium pseudolongum subsp. globosum
A0A0L7BLA2	Bifidobacterium animalis subsp. animalis MCC 0483	A0A2N3QZ19	Bifidobacterium pseudolongum subsp. globosum
A0A0L7BLA2	Bifidobacterium animalis subsp. animalis MCC 0483	A0A2N3R069	Bifidobacterium pseudolongum subsp. pseudolongum
A0A0L7BLA2	Bifidobacterium animalis subsp. animalis MCC 0483	A0A2N3R446	Bifidobacterium pseudolongum subsp. globosum
A0A0L7BLA2	Bifidobacterium animalis subsp. animalis MCC 0483	A0A2N5IVY3	Bifidobacterium anseris
A0A0L7BLA2	Bifidobacterium animalis subsp. animalis MCC 0483	B8DWU2	Bifidobacterium animalis subsp. lactis AD011
A0A0L7BLA2	Bifidobacterium animalis subsp. animalis MCC 0483	D3R6V8	Bifidobacterium animalis subsp. lactis BB-12
A0A0Q4Z2U5	Methylobacterium sp. Leaf104	A0A0Q4T4A2	Methylobacterium sp. Leaf85
A0A0Q4Z2U5	Methylobacterium sp. Leaf104	A0A0Q4V0Y4	Methylobacterium sp. Leaf86
A0A0Q4Z2U5	Methylobacterium sp. Leaf104	A0A0Q4XF80	Methylobacterium sp. Leaf99
A0A0Q4Z2U5	Methylobacterium sp. Leaf104	A0A0Q4XUC2	Methylobacterium sp. Leaf93
A0A0Q4Z2U5	Methylobacterium sp. Leaf104	A0A0Q4Z2U5	Methylobacterium sp. Leaf104
A0A0Q4Z2U5	Methylobacterium sp. Leaf104	A0A0Q5C4N8	Methylobacterium sp. Leaf125
A0A0Q4Z2U5	Methylobacterium sp. Leaf104	A0A0Q5ZUM3	Methylobacterium sp. Leaf399
A0A0Q4Z2U5	Methylobacterium sp. Leaf104	A0A0S9PR87	Methylobacterium sp. Leaf111
A0A0Q4Z2U5	Methylobacterium sp. Leaf104	A0A0S9QBI7	Methylobacterium sp. Leaf112
A0A0Q4Z2U5	Methylobacterium sp. Leaf104	A0A0S9SCF0	Methylobacterium sp. Leaf113
A0A0Q4Z2U5	Methylobacterium sp. Leaf104	A0A1I2XAQ6	Methylobacterium gossipiicola
A0A0Q4Z2U5	Methylobacterium sp. Leaf104	A0A2S4LEL5	Methylobacterium sp. V23
A0A0Q4Z2U5	Methylobacterium sp. Leaf104	A0A2T5XBW4	Methylobacterium sp. GV104
A0A0Q4Z2U5	Methylobacterium sp. Leaf104	A0A2U8WHP0	Methylobacterium sp. 17SD2-17
A0A0Q6ZHB3	Afipia sp. Root123D2	A0A0N1N1R2	Bosea vaviloviae
A0A0Q6ZHB3	Afipia sp. Root123D2	A0A0Q6ZHB3	Afipia sp. Root123D2
A0A0Q6ZHB3	Afipia sp. Root123D2	A0A0Q9GU95	Bosea sp. Root381
A0A0Q6ZHB3	Afipia sp. Root123D2	A0A0Q9IT82	Bosea sp. Root483D1
A0A0Q6ZHB3	Afipia sp. Root123D2	A0A161R663	Tardiphaga robiniae
A0A0Q6ZHB3	Afipia sp. Root123D2	A0A1E3GXG3	Methylobrevis pamukkalensis
A0A0Q6ZHB3	Afipia sp. Root123D2	A0A1G3IRM7	Rhodospirillales bacterium RIFCSPLOWO2_12_FULL_67_
A0A0Q6ZHB3	Afipia sp. Root123D2	A0A1H0BHV2	Afipia sp. GAS231
A0A0Q6ZHB3	Afipia sp. Root123D2	A0A1H1TBU0	Bradyrhizobium canariense
A0A0Q6ZHB3	Afipia sp. Root123D2	A0A1H6N1T2	Tardiphaga sp. OK245
A0A0Q6ZHB3	Afipia sp. Root123D2	A0A1M5MZ31	Bradyrhizobium erythrophlei
A0A0Q6ZHB3	Afipia sp. Root123D2	A0A1M6KKI9	Bradyrhizobium lablabi
A0A0Q6ZHB3	Afipia sp. Root123D2	A0A1M7FEC3	Bradyrhizobium lablabi
A0A0Q6ZHB3	Afipia sp. Root123D2	A0A1M7SUE5	Bradyrhizobium erythrophlei
A0A0Q6ZHB3	Afipia sp. Root123D2	A0A1W6ZRX3	Pseudorhodoplanes sinuspersici
A0A0Q6ZHB3	Afipia sp. Root123D2	A0A1W9I4Y9	Proteobacteria bacterium SG_bin8
A0A0Q6ZHB3	Afipia sp. Root123D2	A0A1W9K9P2	Proteobacteria bacterium ST_bin15
A0A0Q6ZHB3	Afipia sp. Root123D2	A0A239NYU3	Tardiphaga sp. OK246
A0A0Q6ZHB3	Afipia sp. Root123D2	A0A257Y6K6	Azorhizobium sp. 12-66-6
A0A0Q6ZHB3	Afipia sp. Root123D2	A0A258IFW9	Rhizobiales bacterium 32-66-11
A0A0Q6ZHB3	Afipia sp. Root123D2	A0A258KBI1	Azorhizobium sp. 32-67-21
A0A0Q6ZHB3	Afipia sp. Root123D2	A0A258NKZ6	Azorhizobium sp. 35-67-15
A0A0Q6ZHB3	Afipia sp. Root123D2	A0A259CBR9	Rhizobiales bacterium 17-65-6
A0A0Q6ZHB3	Afipia sp. Root123D2	A0A2D6Z927	Afipia sp.
A0A0Q6ZHB3	Afipia sp. Root123D2	A0A2M8ZEA1	Afipia broomeae
A0A0Q6ZHB3	Afipia sp. Root123D2	A0A2T1HSS9	Alsobacter sp. SH9
A0A0Q6ZHB3	Afipia sp. Root123D2	A0A2U0U8I8	Tardiphaga sp. OV697
A0A0Q6ZHB3	Afipia sp. Root123D2	A0A370LBP6	Bosea sp. RCAM04685
A0A0Q6ZHB3	Afipia sp. Root123D2	A0A370QT63	Tardiphaga sp. CF115
A0A0Q6ZHB3	Afipia sp. Root123D2	H0HQ60	Mesorhizobium alhagi CCNWXJ12-2
A0A0Q6ZHB3	Afipia sp. Root123D2	K8P7G8	Afipia broomeae ATCC 49717
A0A0Q8ZQR5	Mycobacterium sp. Root265	A0A0Q8ZQR5	Mycobacterium sp. Root265
A0A0R0LSW9	Ferrovum sp. JA12	A0A0R0LSW9	Ferrovum sp. JA12
A0A0R0LSW9	Ferrovum sp. JA12	A0A257U9I3	Ferrovum sp. 37-45-19
A0A0R0MN77	Curvibacter sp. PAE-UM	A0A0R0MN77	Curvibacter sp. PAE-UM
A0A0R0MN77	Curvibacter sp. PAE-UM	A0A139BW31	Candidatus Gallionella acididurans
A0A0R0MN77	Curvibacter sp. PAE-UM	A0A257QN51	Burkholderiales bacterium 21-58-4
A0A0R0MN77	Curvibacter sp. PAE-UM	A0A2D0IAV7	Curvibacter sp. PD_MW3
A0A0R0MN77	Curvibacter sp. PAE-UM	A0A2N2RPW1	Betaproteobacteria bacterium HGW-Betaproteobacteri
A0A0R1P755	Lactobacillus gallinarum DSM 10532 = JCM 2011	A0A0R1P755	Lactobacillus gallinarum DSM 10532 = JCM 2011
A0A0R1UI57	Lactobacillus equigenerosi DSM 18793 = JCM 14505	A0A0R1UI57	Lactobacillus equigenerosi DSM 18793 = JCM 14505
A0A0R1UID8	Lactobacillus kalixensis DSM 16043	A0A0R1UID8	Lactobacillus kalixensis DSM 16043
A0A0R1Y2Z7	Lactobacillus intestinalis DSM 6629	A0A0R1Y2Z7	Lactobacillus intestinalis DSM 6629
A0A0R1Y2Z7	Lactobacillus intestinalis DSM 6629	N1ZWW1	Lactobacillus sp. ASF360
A0A0R1YAD8	Lactobacillus aviarius subsp. aviarius DSM 20655	A0A0R1YAD8	Lactobacillus aviarius subsp. aviarius DSM 20655
A0A0R1YAD8	Lactobacillus aviarius subsp. aviarius DSM 20655	A0A179C2I8	Lactobacillus aviarius
A0A0R1YAD8	Lactobacillus aviarius subsp. aviarius DSM 20655	A0A2A7PX64	Lactobacillus aviarius
A0A0R2TUA7	Rhodobacter sp. BACL10 MAG-120910-bin24	A0A0R2TUA7	Rhodobacter sp. BACL10 MAG-120910-bin24
A0A0S2PHA1	Streptomyces hygroscopicus subsp. limoneus	A0A0S2PHA1	Streptomyces hygroscopicus subsp. limoneus
A0A0S2PHA1	Streptomyces hygroscopicus subsp. limoneus	A0A117QAS3	Streptomyces corchorusii
A0A0S2PHA1	Streptomyces hygroscopicus subsp. limoneus	A0A2S4ZSV7	Streptomyces sp. Ru62
A0A0S2PHA1	Streptomyces hygroscopicus subsp. limoneus	H2JXY5	Streptomyces hygroscopicus subsp. jinggangensis 50
A0A0S8B0N3	Betaproteobacteria bacterium SG8_39	A0A0S8B0N3	Betaproteobacteria bacterium SG8_39
A0A0S8B0N3	Betaproteobacteria bacterium SG8_39	A0A177QV77	Betaproteobacteria bacterium SCGC AG-212-J23
A0A0T5NN22	Roseovarius atlanticus	A0A0T5NN22	Roseovarius atlanticus
A0A0X3SEK4	Streptomyces sp. NRRL F-5122	A0A0X3SEK4	Streptomyces sp. NRRL F-5122
A0A0X3SEK4	Streptomyces sp. NRRL F-5122	A0A1C6PSI5	Streptomyces sp. WMMB 322
A0A0X3SEK4	Streptomyces sp. NRRL F-5122	A0A2A2YV49	Streptomyces sp. SA15
A0A0X3SEK4	Streptomyces sp. NRRL F-5122	A0A2N0I5F4	Streptomyces sp. 69
A0A100I0U5	Mycobacterium pseudoshottsii JCM 15466	A0A100I0U5	Mycobacterium pseudoshottsii JCM 15466
A0A100I0U5	Mycobacterium pseudoshottsii JCM 15466	A0A1B4Y988	Mycobacterium ulcerans subsp. shinshuense
A0A100I0U5	Mycobacterium pseudoshottsii JCM 15466	A0A2Z5Y895	Mycobacterium marinum
A0A100I0U5	Mycobacterium pseudoshottsii JCM 15466	A0PWJ6	Mycobacterium ulcerans Agy99
A0A100I0U5	Mycobacterium pseudoshottsii JCM 15466	B2HLN6	Mycobacterium marinum M
A0A100I0U5	Mycobacterium pseudoshottsii JCM 15466	L7V2N0	Mycobacterium liflandii 128FXT
A0A101K1N1	Bosea sp. WAO	A0A0M3DVI4	Afipia massiliensis
A0A101K1N1	Bosea sp. WAO	A0A0Q7U1V9	Pseudolabrys sp. Root1462
A0A101K1N1	Bosea sp. WAO	A0A0R3MAF0	Bradyrhizobium retamae
A0A101K1N1	Bosea sp. WAO	A0A0S3PPB0	Variibacter gotjawalensis
A0A101K1N1	Bosea sp. WAO	A0A101K1N1	Bosea sp. WAO
A0A101K1N1	Bosea sp. WAO	A0A127ENB1	Rhodoplanes sp. Z2-YC6860
A0A101K1N1	Bosea sp. WAO	A0A1B9YK89	Bradyrhizobium sp. LMTR 3
A0A101K1N1	Bosea sp. WAO	A0A1E4C361	Hyphomicrobium sp. SCN 65-11
A0A101K1N1	Bosea sp. WAO	A0A1I1DQM1	Bosea sp. DSM 18164
A0A101K1N1	Bosea sp. WAO	A0A1M5PH69	Bradyrhizobium erythrophlei
A0A101K1N1	Bosea sp. WAO	A0A1M7CMQ8	Bradyrhizobium lablabi
A0A101K1N1	Bosea sp. WAO	A0A1N6HZ69	Bradyrhizobium erythrophlei
A0A101K1N1	Bosea sp. WAO	A0A1N6LC21	Bradyrhizobium erythrophlei
A0A101K1N1	Bosea sp. WAO	A0A1Q4DJT9	Rhizobiales bacterium 64-17
A0A101K1N1	Bosea sp. WAO	A0A1W9I6S9	Proteobacteria bacterium SG_bin9
A0A101K1N1	Bosea sp. WAO	A0A257KL15	Bradyrhizobiaceae bacterium PARB1
A0A101K1N1	Bosea sp. WAO	A0A2H9VEU9	Bradyrhizobium lablabi
A0A101K1N1	Bosea sp. WAO	A0A2W6A8D6	Pseudomonas stutzeri
A0A101K1N1	Bosea sp. WAO	A0A318XNR2	Bosea sp. CF476
A0A101K1N1	Bosea sp. WAO	A0A346A1K7	Pseudolabrys taiwanensis
A0A101K1N1	Bosea sp. WAO	A0A371B7C9	Pseudolabrys sp. GY_H
A0A101K1N1	Bosea sp. WAO	F7QRF5	Bradyrhizobiaceae bacterium SG-6C
A0A101K1N1	Bosea sp. WAO	H0TV16	Bradyrhizobium sp. STM 3843
A0A101K1N1	Bosea sp. WAO	K8PC61	Afipia clevelandensis ATCC 49720
A0A124E0G2	Mycolicibacterium brisbanense	A0A124E0G2	Mycolicibacterium brisbanense
A0A124E0G2	Mycolicibacterium brisbanense	A0A1A0WR88	Mycobacterium sp. 852013-50091_SCH5140682
A0A124E0G2	Mycolicibacterium brisbanense	A0A1X0B3P8	Mycobacterium aquaticum
A0A127JTH4	Ramlibacter tataouinensis	A0A127JTH4	Ramlibacter tataouinensis
A0A127JV25	Ramlibacter tataouinensis	A0A127JV25	Ramlibacter tataouinensis
A0A140NM28	Providencia stuartii MRSN 2154	A0A0H2QLB1	Moellerella wisconsensis
A0A140NM28	Providencia stuartii MRSN 2154	A0A0N0Z8V0	Moellerella wisconsensis ATCC 35017
A0A140NM28	Providencia stuartii MRSN 2154	A0A140NM28	Providencia stuartii MRSN 2154
A0A140NM28	Providencia stuartii MRSN 2154	A0A1B7JUF0	Providencia heimbachae ATCC 35613
A0A140NM28	Providencia stuartii MRSN 2154	A0A1B8SW43	Providencia rettgeri
A0A140NM28	Providencia stuartii MRSN 2154	A0A1J0EE63	Providencia rettgeri
A0A140NM28	Providencia stuartii MRSN 2154	A0A1S1HJS7	Providencia stuartii
A0A140NM28	Providencia stuartii MRSN 2154	A0A264VRF3	Providencia rettgeri
A0A140NM28	Providencia stuartii MRSN 2154	A0A2A5Q8F9	Providencia rettgeri
A0A140NM28	Providencia stuartii MRSN 2154	A0A335ED23	Acinetobacter baumannii
A0A140NM28	Providencia stuartii MRSN 2154	A0A345LZB2	Providencia sp. WCHPr000369
A0A140NM28	Providencia stuartii MRSN 2154	A0A379FY20	Providencia rettgeri
A0A140NM28	Providencia stuartii MRSN 2154	A0A379G0S6	Providencia rustigianii
A0A140NM28	Providencia stuartii MRSN 2154	A0A379GTS7	Providencia stuartii
A0A140NM28	Providencia stuartii MRSN 2154	D4C4C5	Providencia rettgeri DSM 1131
A0A140NM28	Providencia stuartii MRSN 2154	D4C5Q1	Providencia rettgeri DSM 1131
A0A140NM28	Providencia stuartii MRSN 2154	K8WN26	Providencia sneebia DSM 19967
A0A142LM02	Betaproteobacteria bacterium UKL13-2	A0A142LM02	Betaproteobacteria bacterium UKL13-2
A0A142LM02	Betaproteobacteria bacterium UKL13-2	Q129S6	Polaromonas sp. JS666
A0A149VSM5	Ferrovum sp. PN-J185	A0A149VSM5	Ferrovum sp. PN-J185
A0A158D064	Caballeronia glebae	A0A158D064	Caballeronia glebae
A0A158D064	Caballeronia glebae	A0A158EN16	Caballeronia sordidicola
A0A158D064	Caballeronia glebae	A0A2V4TNH0	Paraburkholderia silvatlantica
A0A162E544	Mycobacterium kansasii	A0A162E544	Mycobacterium kansasii
A0A162E544	Mycobacterium kansasii	A0A163YAU8	Mycobacterium kansasii
A0A162E544	Mycobacterium kansasii	A0A164FDC7	Mycobacterium kansasii
A0A162E544	Mycobacterium kansasii	A0A1A3NJ70	Mycobacterium asiaticum
A0A162E544	Mycobacterium kansasii	A0A1V3WYD5	Mycobacterium kansasii
A0A162E544	Mycobacterium kansasii	A0A1X0KU29	Mycobacterium kansasii
A0A162E544	Mycobacterium kansasii	A0A1X0LAD4	Mycobacterium persicum
A0A162E544	Mycobacterium kansasii	A0A1X1VNC8	Mycobacterium gastri
A0A162E544	Mycobacterium kansasii	U5WR06	Mycobacterium kansasii ATCC 12478
A0A162E544	Mycobacterium kansasii	X7YCG4	Mycobacterium kansasii 824
A0A162E544	Mycobacterium kansasii	X7Z540	Mycobacterium kansasii 732
A0A174RZK3	Clostridium baratii	A0A174RZK3	Clostridium baratii
A0A1A0MF05	Mycobacterium sp. 1164966.3	A0A1A0MF05	Mycobacterium sp. 1164966.3
A0A1A0MF05	Mycobacterium sp. 1164966.3	A0A1A2CIT9	Mycobacterium sp. 852002-51163_SCH5372311
A0A1A1YRB3	Mycobacterium sp. ACS1612	A0A0D6FY17	Mycolicibacterium smegmatis
A0A1A1YRB3	Mycobacterium sp. ACS1612	A0A0K0X3A0	Mycolicibacterium goodii
A0A1A1YRB3	Mycobacterium sp. ACS1612	A0A0T1W785	Mycobacterium sp. Root135
A0A1A1YRB3	Mycobacterium sp. ACS1612	A0A1A0WWM0	Mycobacterium sp. 852013-50091_SCH5140682
A0A1A1YRB3	Mycobacterium sp. ACS1612	A0A1A1YRB3	Mycobacterium sp. ACS1612
A0A1A1YRB3	Mycobacterium sp. ACS1612	A0A1Q4TK29	Mycobacterium sp. SWH-M5
A0A1A1YRB3	Mycobacterium sp. ACS1612	A0A370CNP8	Mycolicibacterium moriokaense
A0A1A1YRB3	Mycobacterium sp. ACS1612	L0IT27	Mycobacterium sp. JS623
A0A1A2GXT7	Mycobacterium colombiense	A0A1A0LJ35	Mycobacterium sp. 1554424.7
A0A1A2GXT7	Mycobacterium colombiense	A0A1A1ZRZ2	Mycobacterium sp. 852002-50816_SCH5313054-b
A0A1A2GXT7	Mycobacterium colombiense	A0A1A2GXT7	Mycobacterium colombiense
A0A1A2GXT7	Mycobacterium colombiense	A0A1A2WFV0	Mycobacterium sp. E2327
A0A1A2GXT7	Mycobacterium colombiense	A0A1A2ZDW4	Mycobacterium sp. E787
A0A1A2GXT7	Mycobacterium colombiense	A0A1A3AUE1	Mycobacterium asiaticum
A0A1A2GXT7	Mycobacterium colombiense	A0A1A3CBL4	Mycobacterium asiaticum
A0A1A2GXT7	Mycobacterium colombiense	A0A1A3E482	Mycobacterium asiaticum
A0A1A2GXT7	Mycobacterium colombiense	A0A1A3ERR5	Mycobacterium asiaticum
A0A1A2GXT7	Mycobacterium colombiense	A0A1A3K508	Mycobacterium asiaticum
A0A1A2GXT7	Mycobacterium colombiense	A0A1A3R450	Mycobacterium sp. 1081908.1
A0A1A2GXT7	Mycobacterium colombiense	A0A1X1W4M3	Mycobacterium interjectum
A0A1A2GXT7	Mycobacterium colombiense	A0A1X1Z609	Mycobacterium palustre
A0A1A2GXT7	Mycobacterium colombiense	A0A1X2AAD3	Mycobacterium paraense
A0A1A2GXT7	Mycobacterium colombiense	A0A1X2E667	Mycobacterium sp. IEC1808
A0A1A2GXT7	Mycobacterium colombiense	A0A2U3NDL7	Mycobacterium sp. AB308
A0A1A2HWP7	Mycobacterium colombiense	A0A1A2HWP7	Mycobacterium colombiense
A0A1A2HWP7	Mycobacterium colombiense	A0A1W9YA27	Mycobacterium alsense
A0A1A2K8Y1	Mycobacterium colombiense	A0A1A2K8Y1	Mycobacterium colombiense
A0A1A3IS32	Mycobacterium asiaticum	A0A1A3IS32	Mycobacterium asiaticum
A0A1A3IS32	Mycobacterium asiaticum	A0A1X1XPM2	Mycobacterium kubicae
A0A1A3N1E0	Mycobacterium asiaticum	A0A0Q2MNY8	Mycobacterium gordonae
A0A1A3N1E0	Mycobacterium asiaticum	A0A1A3BCZ2	Mycobacterium asiaticum
A0A1A3N1E0	Mycobacterium asiaticum	A0A1A3JYU5	Mycobacterium asiaticum
A0A1A3N1E0	Mycobacterium asiaticum	A0A1A3KR97	Mycobacterium asiaticum
A0A1A3N1E0	Mycobacterium asiaticum	A0A1A3N1E0	Mycobacterium asiaticum
A0A1A3N1E0	Mycobacterium asiaticum	A0A1A3N8K9	Mycobacterium asiaticum
A0A1A3N1E0	Mycobacterium asiaticum	A0A1A6BDT1	Mycobacterium gordonae
A0A1A3N1E0	Mycobacterium asiaticum	A0A2M8IMQ8	Mycobacterium sp.
A0A1B1WGI5	Mycobacterium sp. djl-10	A0A1B1WGI5	Mycobacterium sp. djl-10
A0A1B7KKY7	Obesumbacterium proteus ATCC 12841	A0A1B7KKY7	Obesumbacterium proteus ATCC 12841
A0A1C5CC73	Streptomyces sp. MnatMP-M17	A0A1C5CC73	Streptomyces sp. MnatMP-M17
A0A1C7CYK9	Escherichia coli	A0A1C7CYK9	Escherichia coli
A0A1D8T2Z3	Rhodococcus sp. WMMA185	A0A1D8T2Z3	Rhodococcus sp. WMMA185
A0A1E3SB35	Mycobacterium sherrisii	A0A1E3SB35	Mycobacterium sherrisii
A0A1E3SB35	Mycobacterium sherrisii	A0A1X2D0P8	Mycobacterium sherrisii
A0A1E3SKD5	Mycobacterium intermedium	A0A1E3SKD5	Mycobacterium intermedium
A0A1E3SV51	Mycobacterium sherrisii	A0A1A0KIU6	Mycobacterium sp. 1100029.7
A0A1E3SV51	Mycobacterium sherrisii	A0A1A2GBM3	Mycobacterium sp. 852002-51057_SCH5723018
A0A1E3SV51	Mycobacterium sherrisii	A0A1E3SV51	Mycobacterium sherrisii
A0A1E3SV51	Mycobacterium sherrisii	A0A1X0XWU2	Mycobacterium simiae
A0A1E3SV51	Mycobacterium sherrisii	A0A1X1TUZ3	Mycobacterium florentinum
A0A1E3SV51	Mycobacterium sherrisii	A0A1X2C4E4	Mycobacterium saskatchewanense
A0A1E3SV51	Mycobacterium sherrisii	A0A2N5R3K0	Mycobacterium tuberculosis variant microti OV254
A0A1E3SV51	Mycobacterium sherrisii	A0A2R5H009	Mycobacterium montefiorense
A0A1F3ZTI3	Betaproteobacteria bacterium RIFCSPLOWO2_02_FULL_6	A0A1F3YTU0	Betaproteobacteria bacterium RBG_16_64_18
A0A1F3ZTI3	Betaproteobacteria bacterium RIFCSPLOWO2_02_FULL_6	A0A1F3ZTI3	Betaproteobacteria bacterium RIFCSPLOWO2_02_FULL_6
A0A1F3ZTI3	Betaproteobacteria bacterium RIFCSPLOWO2_02_FULL_6	A0A1F4AIL7	Betaproteobacteria bacterium RIFCSPLOWO2_02_64_14
A0A1F3ZTI3	Betaproteobacteria bacterium RIFCSPLOWO2_02_FULL_6	A0A1F4ANI8	Betaproteobacteria bacterium RIFCSPLOWO2_02_FULL_6
A0A1F3ZTI3	Betaproteobacteria bacterium RIFCSPLOWO2_02_FULL_6	A0A1F4C9R6	Betaproteobacteria bacterium RIFCSPLOWO2_12_FULL_6
A0A1F3ZTI3	Betaproteobacteria bacterium RIFCSPLOWO2_02_FULL_6	A0A1F4N3Q1	Burkholderiales bacterium RIFCSPLOWO2_12_FULL_64_9
A0A1F4AZM4	Betaproteobacteria bacterium RIFCSPLOWO2_02_FULL_6	A0A0S8F600	Myxococcales bacterium SG8_38_1
A0A1F4AZM4	Betaproteobacteria bacterium RIFCSPLOWO2_02_FULL_6	A0A1F4AZM4	Betaproteobacteria bacterium RIFCSPLOWO2_02_FULL_6
A0A1G8UBB5	Streptomyces indicus	A0A1G8UBB5	Streptomyces indicus
A0A1G9FE86	Nonomuraea jiangxiensis	A0A1G9FE86	Nonomuraea jiangxiensis
A0A1H6E695	Actinomadura echinospora	A0A1H6E695	Actinomadura echinospora
A0A1H7EJ79	Paraburkholderia diazotrophica	A0A1H7EJ79	Paraburkholderia diazotrophica
A0A1H7EJ79	Paraburkholderia diazotrophica	A0A2C9ASY8	Burkholderia sp. YR290
A0A1H7EJ79	Paraburkholderia diazotrophica	A0A2I8ER30	Paraburkholderia terrae
A0A1H7EJ79	Paraburkholderia diazotrophica	B2JM67	Paraburkholderia phymatum STM815
A0A1H8HCT6	Paracoccus alcaliphilus	A0A1H8HCT6	Paracoccus alcaliphilus
A0A1H8XNC2	Rhodospirillales bacterium URHD0017	A0A1H8XNC2	Rhodospirillales bacterium URHD0017
A0A1I2AG76	Roseivivax sediminis	A0A1I0YR91	Poseidonocella pacifica
A0A1I2AG76	Roseivivax sediminis	A0A1I2AG76	Roseivivax sediminis
A0A1I2AG76	Roseivivax sediminis	A0A1I6EKG5	Poseidonocella sedimentorum
A0A1I2AG76	Roseivivax sediminis	A0A225NMU7	Marinibacterium profundimaris
A0A1I2AG76	Roseivivax sediminis	A0A2D5J9I6	Rhodobacteraceae bacterium
A0A1I2AG76	Roseivivax sediminis	A0A2E3PEA9	Rhodobacteraceae bacterium
A0A1I2AG76	Roseivivax sediminis	A0A2V5FPX6	Rhodobacteraceae bacterium
A0A1I5ES10	Roseovarius lutimaris	A0A1I5ES10	Roseovarius lutimaris
A0A1I5ES10	Roseovarius lutimaris	A0A1M7AK87	Roseovarius marisflavi
A0A1I7D9X4	Sedimentitalea nanhaiensis	A0A1I7D9X4	Sedimentitalea nanhaiensis
A0A1I7D9X4	Sedimentitalea nanhaiensis	A0A2U2CHS1	Maritimibacter sp. 55A14
A0A1J5S3B5	mine drainage metagenome	A0A1J5S3B5	mine drainage metagenome
A0A1L6HX43	Paraburkholderia sp. SOS3	A0A1L6HX43	Paraburkholderia sp. SOS3
A0A1N7PZ39	Paracoccus saliphilus	A0A1N7PZ39	Paracoccus saliphilus
A0A1N7PZ39	Paracoccus saliphilus	A0A2T1L9J7	Methylarcula marina
A0A1N7PZ39	Paracoccus saliphilus	A0A316C2E1	Pseudaminobacter salicylatoxidans
A0A1P8FII0	Betaproteobacteria bacterium GR16-43	A0A1P8FII0	Betaproteobacteria bacterium GR16-43
A0A1P8XAI4	Mycobacterium sp. MS1601	A0A1P8XAI4	Mycobacterium sp. MS1601
A0A1Q3V729	Rhodospirillales bacterium 69-11	A0A1Q3V729	Rhodospirillales bacterium 69-11
A0A1Q3V729	Rhodospirillales bacterium 69-11	A0A354UZ89	Acetobacteraceae bacterium
A0A1Q4UAP0	Mycobacterium sp. SWH-M3	A0A1Q4UAP0	Mycobacterium sp. SWH-M3
A0A1Q4UAP0	Mycobacterium sp. SWH-M3	X5KV65	Mycolicibacterium mageritense DSM 44476 = CIP 1049
A0A1Q6EIX1	Bacteroidales bacterium 52_46	A0A1Q6EIX1	Bacteroidales bacterium 52_46
A0A1Q6U9W8	Azospirillum sp. 51_20	A0A1Q6U9W8	Azospirillum sp. 51_20
A0A1Q7BLT2	Alphaproteobacteria bacterium 13_2_20CM_2_64_7	A0A0A1P6D4	bacterium YEK0313
A0A1Q7BLT2	Alphaproteobacteria bacterium 13_2_20CM_2_64_7	A0A1Q7BLT2	Alphaproteobacteria bacterium 13_2_20CM_2_64_7
A0A1Q7BLT2	Alphaproteobacteria bacterium 13_2_20CM_2_64_7	A0A363TSA2	Bradyrhizobiaceae bacterium
A0A1R0TX31	Mycolicibacter heraklionensis	A0A1H6J1M3	Mycolicibacterium rutilum
A0A1R0TX31	Mycolicibacter heraklionensis	A0A1R0TX31	Mycolicibacter heraklionensis
A0A1R0TX31	Mycolicibacter heraklionensis	A0A1R0UCF0	Mycolicibacter heraklionensis
A0A1S8FID2	Polaromonas sp. A23	A0A1S8FID2	Polaromonas sp. A23
A0A1U7DJZ3	Brevirhabdus pacifica	A0A1U7DJZ3	Brevirhabdus pacifica
A0A1V8NTB4	Citrobacter braakii	A0A1V8NTB4	Citrobacter braakii
A0A1V8NTB4	Citrobacter braakii	A0A1X2RQ35	Salmonella enterica subsp. enterica serovar Rough
A0A1V8NTB4	Citrobacter braakii	A0A1Z3Q6U0	Salmonella enterica subsp. enterica serovar India
A0A1V8NTB4	Citrobacter braakii	A0A2K8W0C8	Dickeya solani RNS 08.23.3.1.A
A0A1W9ZN50	Mycobacterium arosiense ATCC BAA-1401 = DSM 45069	A0A051UFM2	Mycobacterium [tuberculosis] TKK-01-0051
A0A1W9ZN50	Mycobacterium arosiense ATCC BAA-1401 = DSM 45069	A0A1A0VBU9	Mycobacterium colombiense
A0A1W9ZN50	Mycobacterium arosiense ATCC BAA-1401 = DSM 45069	A0A1A2B4G7	Mycobacterium sp. 852002-51971_SCH5477799-a
A0A1W9ZN50	Mycobacterium arosiense ATCC BAA-1401 = DSM 45069	A0A1A2G2L4	Mycobacterium sp. 852002-51057_SCH5723018
A0A1W9ZN50	Mycobacterium arosiense ATCC BAA-1401 = DSM 45069	A0A1A2S4J6	Mycobacterium colombiense
A0A1W9ZN50	Mycobacterium arosiense ATCC BAA-1401 = DSM 45069	A0A1A2SGF7	Mycobacterium colombiense
A0A1W9ZN50	Mycobacterium arosiense ATCC BAA-1401 = DSM 45069	A0A1A2ST97	Mycobacterium colombiense
A0A1W9ZN50	Mycobacterium arosiense ATCC BAA-1401 = DSM 45069	A0A1A2TW38	Mycobacterium colombiense
A0A1W9ZN50	Mycobacterium arosiense ATCC BAA-1401 = DSM 45069	A0A1A2YP82	Mycobacterium colombiense
A0A1W9ZN50	Mycobacterium arosiense ATCC BAA-1401 = DSM 45069	A0A1A3DTQ8	Mycobacterium asiaticum
A0A1W9ZN50	Mycobacterium arosiense ATCC BAA-1401 = DSM 45069	A0A1A3SBE6	Mycobacterium colombiense
A0A1W9ZN50	Mycobacterium arosiense ATCC BAA-1401 = DSM 45069	A0A1A3UVC2	Mycobacterium sp. 1165178.9
A0A1W9ZN50	Mycobacterium arosiense ATCC BAA-1401 = DSM 45069	A0A1R0USZ2	Mycobacterium colombiense
A0A1W9ZN50	Mycobacterium arosiense ATCC BAA-1401 = DSM 45069	A0A1W9ZN50	Mycobacterium arosiense ATCC BAA-1401 = DSM 45069
A0A1W9ZN50	Mycobacterium arosiense ATCC BAA-1401 = DSM 45069	A0A1X0FY38	Mycobacterium mantenii
A0A1W9ZN50	Mycobacterium arosiense ATCC BAA-1401 = DSM 45069	A0A1X2CDC8	Mycobacterium saskatchewanense
A0A1W9ZN50	Mycobacterium arosiense ATCC BAA-1401 = DSM 45069	A0A1X2KZ84	Mycolicibacterium vulneris
A0A1W9ZN50	Mycobacterium arosiense ATCC BAA-1401 = DSM 45069	A0A329M6C7	Mycobacterium colombiense
A0A1W9ZN50	Mycobacterium arosiense ATCC BAA-1401 = DSM 45069	J7TUT2	Mycobacterium colombiense CECT 3035
A0A1W9ZTI0	Mycobacterium angelicum	A0A1W9ZTI0	Mycobacterium angelicum
A0A1W9ZTI0	Mycobacterium angelicum	A0A1X2BUN4	Mycobacterium riyadhense
A0A1W9ZTI0	Mycobacterium angelicum	A0A1X2DPP8	Mycobacterium szulgai
A0A1X0JZE6	Mycobacterium shinjukuense	A0A1X0JZE6	Mycobacterium shinjukuense
A0A1X0T552	Aurantimonas sp. 22II-16-19i	A0A1X0T552	Aurantimonas sp. 22II-16-19i
A0A1X0T552	Aurantimonas sp. 22II-16-19i	A0A2E1HBG0	Fulvimarina sp.
A0A1X1RAV3	Mycobacterium bohemicum	A0A1X1RAV3	Mycobacterium bohemicum
A0A1X1SQM4	Mycolicibacterium confluentis	A0A1X1SQM4	Mycolicibacterium confluentis
A0A1X1U5U9	Mycobacterium florentinum	A0A024JR80	Mycobacterium triplex
A0A1X1U5U9	Mycobacterium florentinum	A0A0E3WB32	Mycobacterium lentiflavum
A0A1X1U5U9	Mycobacterium florentinum	A0A1A0KFJ8	Mycobacterium sp. 1100029.7
A0A1X1U5U9	Mycobacterium florentinum	A0A1E3SLI3	Mycobacterium sherrisii
A0A1X1U5U9	Mycobacterium florentinum	A0A1X0Y4K5	Mycobacterium simiae
A0A1X1U5U9	Mycobacterium florentinum	A0A1X1U5U9	Mycobacterium florentinum
A0A1X1U5U9	Mycobacterium florentinum	A0A2K4Y427	Mycobacterium ahvazicum
A0A1X1U5U9	Mycobacterium florentinum	A0A2M8I973	Mycobacterium sp.
A0A1X1U5U9	Mycobacterium florentinum	A0A2N5R5X5	Mycobacterium tuberculosis variant microti OV254
A0A1X1U5U9	Mycobacterium florentinum	A0A2U3NPR0	Mycobacterium sp. AB57
A0A1X1U5U9	Mycobacterium florentinum	A0A2U3P6A9	Mycobacterium sp. AB215
A0A1X1UPJ1	Mycobacterium fragae	A0A1X1UPJ1	Mycobacterium fragae
A0A1X1V173	Mycobacterium europaeum	A0A0U1D4H6	Mycobacterium europaeum
A0A1X1V173	Mycobacterium europaeum	A0A1A0UC43	Mycobacterium sp. 852014-50255_SCH5639931
A0A1X1V173	Mycobacterium europaeum	A0A1A1WHW7	Mycobacterium sp. ACS4054
A0A1X1V173	Mycobacterium europaeum	A0A1A2DNG7	Mycobacterium sp. 852014-52450_SCH5900713
A0A1X1V173	Mycobacterium europaeum	A0A1A2J8R7	Mycobacterium colombiense
A0A1X1V173	Mycobacterium europaeum	A0A1A2M2I6	Mycobacterium colombiense
A0A1X1V173	Mycobacterium europaeum	A0A1A2N8R8	Mycobacterium colombiense
A0A1X1V173	Mycobacterium europaeum	A0A1A2NL52	Mycobacterium colombiense
A0A1X1V173	Mycobacterium europaeum	A0A1A2NL71	Mycobacterium colombiense
A0A1X1V173	Mycobacterium europaeum	A0A1A2PYF3	Mycobacterium colombiense
A0A1X1V173	Mycobacterium europaeum	A0A1A2UY37	Mycobacterium sp. E2733
A0A1X1V173	Mycobacterium europaeum	A0A1A2VLB4	Mycobacterium scrofulaceum
A0A1X1V173	Mycobacterium europaeum	A0A1A2WV29	Mycobacterium sp. E2497
A0A1X1V173	Mycobacterium europaeum	A0A1A2XXN0	Mycobacterium sp. E1386
A0A1X1V173	Mycobacterium europaeum	A0A1B9CJD4	Mycobacterium malmoense
A0A1X1V173	Mycobacterium europaeum	A0A1Q4HNW8	Mycobacterium paraffinicum
A0A1X1V173	Mycobacterium europaeum	A0A1R0UID1	Mycobacterium sp. SP-6446
A0A1X1V173	Mycobacterium europaeum	A0A1X0DT11	Mycobacterium heidelbergense
A0A1X1V173	Mycobacterium europaeum	A0A1X0I6R3	Mycobacterium paraseoulense
A0A1X1V173	Mycobacterium europaeum	A0A1X0KKN8	Mycobacterium scrofulaceum
A0A1X1V173	Mycobacterium europaeum	A0A1X1V173	Mycobacterium europaeum
A0A1X1V173	Mycobacterium europaeum	A0A1X1ZW81	Mycobacterium nebraskense
A0A1X1V173	Mycobacterium europaeum	D5PAD6	Mycobacterium parascrofulaceum ATCC BAA-614
A0A1X1Y6B9	Mycobacterium kyorinense	A0A1X1Y6B9	Mycobacterium kyorinense
A0A1X2AYD1	Mycobacterium parmense	A0A1X2AYD1	Mycobacterium parmense
A0A1X2B6U1	Mycobacterium parmense	A0A1S2WFE4	Mycobacterium malmoense
A0A1X2B6U1	Mycobacterium parmense	A0A1X0ELI0	Mycobacterium malmoense
A0A1X2B6U1	Mycobacterium parmense	A0A1X2B6U1	Mycobacterium parmense
A0A1X2BZR2	Mycobacterium saskatchewanense	A0A1X2BZR2	Mycobacterium saskatchewanense
A0A1X2LY62	Mycobacterium decipiens	A0A066S2Y0	Mycobacterium tuberculosis
A0A1X2LY62	Mycobacterium decipiens	A0A0E8U3K5	Mycobacterium tuberculosis
A0A1X2LY62	Mycobacterium decipiens	A0A0H3L4N0	Mycobacterium tuberculosis str. Erdman = ATCC 3580
A0A1X2LY62	Mycobacterium decipiens	A0A0I9TU00	Mycobacterium haemophilum
A0A1X2LY62	Mycobacterium decipiens	A0A1R0VLT9	Mycobacterium sp. IS-2888
A0A1X2LY62	Mycobacterium decipiens	A0A1X1TJQ5	Mycobacterium conspicuum
A0A1X2LY62	Mycobacterium decipiens	A0A1X1XJ26	Mycobacterium lacus
A0A1X2LY62	Mycobacterium decipiens	A0A1X2LY62	Mycobacterium decipiens
A0A1X7DIM3	Paraburkholderia caryophylli	A0A1X7DIM3	Paraburkholderia caryophylli
A0A1X7DIM3	Paraburkholderia caryophylli	A0A2N7X0E9	Paraburkholderia symbiotica
A0A1X7DIM3	Paraburkholderia caryophylli	A0A2T3XTT6	Paraburkholderia symbiotica
A0A1Z8LJ86	Rhodospirillaceae bacterium TMED8	A0A1Z8LJ86	Rhodospirillaceae bacterium TMED8
A0A1Z8LJ86	Rhodospirillaceae bacterium TMED8	A0A2D7ABT8	Magnetovibrio sp.
A0A1Z8UZI4	Candidatus Puniceispirillum sp. TMED52	A0A1Z8UZI4	Candidatus Puniceispirillum sp. TMED52
A0A1Z8XK41	Hyphomicrobiaceae bacterium TMED74	A0A1Z8XK41	Hyphomicrobiaceae bacterium TMED74
A0A1Z9K2M6	Gammaproteobacteria bacterium TMED183	A0A1Z9K2M6	Gammaproteobacteria bacterium TMED183
A0A1Z9K2M6	Gammaproteobacteria bacterium TMED183	A0A2A5YCQ9	SAR116 cluster bacterium MED-G04
A0A210RZT5	Polynucleobacter hirudinilacicola	A0A0E3V0T0	Polynucleobacter duraquae
A0A210RZT5	Polynucleobacter hirudinilacicola	A0A191UG47	Polynucleobacter wuianus
A0A210RZT5	Polynucleobacter hirudinilacicola	A0A1G3CQJ0	Polynucleobacter sp. GWA2_45_21
A0A210RZT5	Polynucleobacter hirudinilacicola	A0A1J0D4I6	Polynucleobacter asymbioticus
A0A210RZT5	Polynucleobacter hirudinilacicola	A0A1L9GLE5	Polynucleobacter sp. MWH-Adler-W8
A0A210RZT5	Polynucleobacter hirudinilacicola	A0A1R0HCZ3	Polynucleobacter sphagniphilus
A0A210RZT5	Polynucleobacter hirudinilacicola	A0A1S2T3G7	Polynucleobacter sp. QLW-P1DATA-2
A0A210RZT5	Polynucleobacter hirudinilacicola	A0A210RZT5	Polynucleobacter hirudinilacicola
A0A210RZT5	Polynucleobacter hirudinilacicola	A0A240E1E6	Polynucleobacter meluiroseus
A0A210RZT5	Polynucleobacter hirudinilacicola	A0A254PX16	Polynucleobacter campilacus
A0A210RZT5	Polynucleobacter hirudinilacicola	A0A254Q050	Polynucleobacter aenigmaticus
A0A210RZT5	Polynucleobacter hirudinilacicola	A0A258MA42	Polynucleobacter sp. 35-46-11
A0A210RZT5	Polynucleobacter hirudinilacicola	A0A259IPD5	Polynucleobacter sp. 39-46-10
A0A210RZT5	Polynucleobacter hirudinilacicola	A0A2M8VJB7	Polynucleobacter sp. UB-Domo-W1
A0A210RZT5	Polynucleobacter hirudinilacicola	A0A2Z4JGI2	Polynucleobacter sp. MWH-Creno-4B4
A0A210RZT5	Polynucleobacter hirudinilacicola	A0A2Z4JTI1	Polynucleobacter asymbioticus
A0A210RZT5	Polynucleobacter hirudinilacicola	A4SWJ1	Polynucleobacter asymbioticus QLW-P1DMWA-1
A0A210RZT5	Polynucleobacter hirudinilacicola	M1RRI6	beta proteobacterium CB
A0A243V1A0	Escherichia coli	A0A023Z0Q6	Escherichia coli O145:H28 str. RM12581
A0A243V1A0	Escherichia coli	A0A024KYA0	Escherichia coli D6-113.11
A0A243V1A0	Escherichia coli	A0A026UMI9	Escherichia coli O174:H8 str. 04-3038
A0A243V1A0	Escherichia coli	A0A028AST1	Escherichia coli O69:H11 str. 08-4661
A0A243V1A0	Escherichia coli	A0A029HTY6	Escherichia coli 2-005-03_S4_C3
A0A243V1A0	Escherichia coli	A0A029IQA9	Escherichia coli 2-005-03_S4_C2
A0A243V1A0	Escherichia coli	A0A061L6Z2	Escherichia coli
A0A243V1A0	Escherichia coli	A0A070SLK1	Escherichia coli 2-210-07_S3_C3
A0A243V1A0	Escherichia coli	A0A073FUW8	Escherichia coli 2-427-07_S4_C3
A0A243V1A0	Escherichia coli	A0A073HBG2	Escherichia coli 5-366-08_S1_C3
A0A243V1A0	Escherichia coli	A0A073UGW0	Escherichia coli 5-366-08_S1_C1
A0A243V1A0	Escherichia coli	A0A080IU12	Escherichia coli 1-250-04_S3_C2
A0A243V1A0	Escherichia coli	A0A090NL70	Shigella dysenteriae WRSd3
A0A243V1A0	Escherichia coli	A0A0A0FCC2	Escherichia coli G3/10
A0A243V1A0	Escherichia coli	A0A0B1KXE7	Escherichia coli
A0A243V1A0	Escherichia coli	A0A0D8VXR4	Escherichia coli
A0A243V1A0	Escherichia coli	A0A0D8WDG1	Escherichia coli
A0A243V1A0	Escherichia coli	A0A0E0U132	Escherichia coli UMNK88
A0A243V1A0	Escherichia coli	A0A0E0XW73	Escherichia coli O104:H4 str. 2011C-3493
A0A243V1A0	Escherichia coli	A0A0G3K9Q9	Escherichia coli PCN033
A0A243V1A0	Escherichia coli	A0A0H2V2Q9	Shigella flexneri
A0A243V1A0	Escherichia coli	A0A0H2V970	Escherichia coli CFT073
A0A243V1A0	Escherichia coli	A0A0J2EDW6	Escherichia coli
A0A243V1A0	Escherichia coli	A0A0J2EGH1	Escherichia coli
A0A243V1A0	Escherichia coli	A0A0K3L4J4	Escherichia coli
A0A243V1A0	Escherichia coli	A0A0K3Y744	Escherichia coli
A0A243V1A0	Escherichia coli	A0A0L6XZL7	Escherichia coli
A0A243V1A0	Escherichia coli	A0A0L7AN87	Escherichia coli
A0A243V1A0	Escherichia coli	A0A0P7MSF1	Escherichia coli
A0A243V1A0	Escherichia coli	A0A0Q3BCQ9	Escherichia coli
A0A243V1A0	Escherichia coli	A0A0V9N1N5	Escherichia coli
A0A243V1A0	Escherichia coli	A0A125X177	Escherichia coli 1-110-08_S3_C1
A0A243V1A0	Escherichia coli	A0A152XNA1	Escherichia coli
A0A243V1A0	Escherichia coli	A0A1E2VPU5	Shigella sp. FC2928
A0A243V1A0	Escherichia coli	A0A1E3N4A4	Shigella sp. FC569
A0A243V1A0	Escherichia coli	A0A1M2HRZ3	Escherichia coli
A0A243V1A0	Escherichia coli	A0A1M2U467	Escherichia coli
A0A243V1A0	Escherichia coli	A0A1Q6B5J0	Escherichia coli
A0A243V1A0	Escherichia coli	A0A1S6TDM2	Escherichia coli M8
A0A243V1A0	Escherichia coli	A0A1S9K2H7	Shigella dysenteriae
A0A243V1A0	Escherichia coli	A0A1U9T669	Escherichia coli
A0A243V1A0	Escherichia coli	A0A1X3LFW3	Escherichia coli TA054
A0A243V1A0	Escherichia coli	A0A209A2Q4	Yersinia frederiksenii
A0A243V1A0	Escherichia coli	A0A209AWU9	Yersinia frederiksenii
A0A243V1A0	Escherichia coli	A0A243V1A0	Escherichia coli
A0A243V1A0	Escherichia coli	A0A246W155	Escherichia coli
A0A243V1A0	Escherichia coli	A0A271QZJ3	Escherichia coli
A0A243V1A0	Escherichia coli	A0A2A2C4U6	Escherichia coli
A0A243V1A0	Escherichia coli	A0A2A7M2F7	Escherichia coli
A0A243V1A0	Escherichia coli	A0A2D0P4P4	Escherichia coli O127:H6
A0A243V1A0	Escherichia coli	A0A2H4TX11	Escherichia coli
A0A243V1A0	Escherichia coli	A0A2H9A4L4	Escherichia coli
A0A243V1A0	Escherichia coli	A0A2I6LF99	Escherichia coli
A0A243V1A0	Escherichia coli	A0A2J1C3R5	Escherichia coli
A0A243V1A0	Escherichia coli	A0A2K0PZR4	Shigella flexneri
A0A243V1A0	Escherichia coli	A0A2K3TWU2	Escherichia coli
A0A243V1A0	Escherichia coli	A0A2K4P6M6	Escherichia coli
A0A243V1A0	Escherichia coli	A0A2S4ABX0	Escherichia coli
A0A243V1A0	Escherichia coli	A0A2S8D879	Shigella dysenteriae
A0A243V1A0	Escherichia coli	A0A2S8DKT9	Shigella boydii
A0A243V1A0	Escherichia coli	A0A2S8JJF0	Escherichia coli
A0A243V1A0	Escherichia coli	A0A2U9KTR8	Escherichia coli
A0A243V1A0	Escherichia coli	A0A2X1KIW1	Escherichia coli
A0A243V1A0	Escherichia coli	A0A2X1MHQ2	Escherichia coli
A0A243V1A0	Escherichia coli	A0A2X1NI98	Escherichia coli
A0A243V1A0	Escherichia coli	A0A2X3A375	Escherichia coli
A0A243V1A0	Escherichia coli	A0A2X5RHE7	Escherichia coli
A0A243V1A0	Escherichia coli	A0A2X6DGT8	Escherichia coli
A0A243V1A0	Escherichia coli	A0A2X7EQ18	Escherichia coli
A0A243V1A0	Escherichia coli	A0A2X7H732	Escherichia coli
A0A243V1A0	Escherichia coli	A0A2Y0XFE7	Escherichia coli
A0A243V1A0	Escherichia coli	A0A2Y4XH03	Shigella flexneri
A0A243V1A0	Escherichia coli	A0A329XX95	Escherichia coli
A0A243V1A0	Escherichia coli	A0A330CCK0	Escherichia coli
A0A243V1A0	Escherichia coli	A0A345ES79	Escherichia coli
A0A243V1A0	Escherichia coli	A0A346HNG6	Escherichia coli
A0A243V1A0	Escherichia coli	A0A366V745	Escherichia coli
A0A243V1A0	Escherichia coli	A0A368INW7	Escherichia coli
A0A243V1A0	Escherichia coli	A0A369EGU3	Escherichia coli
A0A243V1A0	Escherichia coli	A0A376J1P0	Escherichia coli
A0A243V1A0	Escherichia coli	A0A376PSD6	Escherichia coli
A0A243V1A0	Escherichia coli	A0A376U5N2	Escherichia coli
A0A243V1A0	Escherichia coli	A0A377CTZ5	Escherichia coli
A0A243V1A0	Escherichia coli	A0A377MYY4	Escherichia coli
A0A243V1A0	Escherichia coli	A0A377NPN2	Escherichia coli
A0A243V1A0	Escherichia coli	A0A383HJG9	Escherichia coli
A0A243V1A0	Escherichia coli	A7ZPI1	Escherichia coli O139:H28 str. E24377A
A0A243V1A0	Escherichia coli	D6JDA1	Escherichia coli B354
A0A243V1A0	Escherichia coli	D7Y9Y4	Escherichia coli MS 115-1
A0A243V1A0	Escherichia coli	E7SY90	Shigella boydii ATCC 9905
A0A243V1A0	Escherichia coli	E7TDE6	Shigella flexneri CDC 796-83
A0A243V1A0	Escherichia coli	F3V7Z7	Shigella dysenteriae 155-74
A0A243V1A0	Escherichia coli	F3WKB0	Shigella boydii 5216-82
A0A243V1A0	Escherichia coli	F5N483	Shigella flexneri VA-6
A0A243V1A0	Escherichia coli	F5NYE1	Shigella flexneri K-227
A0A243V1A0	Escherichia coli	I2S174	Escherichia coli 97.0246
A0A243V1A0	Escherichia coli	I2WH42	Escherichia coli 9.0111
A0A243V1A0	Escherichia coli	I2WUK6	Escherichia coli 4.0967
A0A243V1A0	Escherichia coli	I6CIJ6	Shigella flexneri K-315
A0A243V1A0	Escherichia coli	I6D860	Shigella boydii 965-58
A0A243V1A0	Escherichia coli	I6FPT4	Shigella dysenteriae 225-75
A0A243V1A0	Escherichia coli	K0X3A2	Shigella flexneri 1485-80
A0A243V1A0	Escherichia coli	S1IEQ5	Escherichia coli KTE107
A0A243V1A0	Escherichia coli	V6FX87	Escherichia coli 99.0741
A0A263DZ11	Pseudonocardia sp. MH-G8	A0A263DZ11	Pseudonocardia sp. MH-G8
A0A2A4LL73	Rhizobiales bacterium	A0A2A4LL73	Rhizobiales bacterium
A0A2A4LL73	Rhizobiales bacterium	A0A2G2B1G1	Marinosulfonomonas sp.
A0A2A4PIS9	Rhodospirillaceae bacterium	A0A2A4PIS9	Rhodospirillaceae bacterium
A0A2A4PIS9	Rhodospirillaceae bacterium	A0A2A4R7V0	Rhizobiales bacterium
A0A2A4PIS9	Rhodospirillaceae bacterium	A0A2S6UDU7	Alphaproteobacteria bacterium MarineAlpha3_Bin2
A0A2A9CZC6	Serinibacter salmoneus	A0A2A9CZC6	Serinibacter salmoneus
A0A2B8BGY7	Azospirillum sp. B2	A0A2B8BGY7	Azospirillum sp. B2
A0A2B8BGY7	Azospirillum sp. B2	A0A2R4VTM0	Azospirillum humicireducens
A0A2D4UPQ3	Candidatus Puniceispirillum sp.	A0A2D4UPQ3	Candidatus Puniceispirillum sp.
A0A2D7K0W4	Marinovum sp.	A0A2D7K0W4	Marinovum sp.
A0A2D7K0W4	Marinovum sp.	A0A2E7WJP3	Marinovum sp.
A0A2D7K0W4	Marinovum sp.	A0A357FCK4	Rhodobacteraceae bacterium
A0A2D7K0W4	Marinovum sp.	A0A357LT76	Rhodobacteraceae bacterium
A0A2D8Z044	Magnetovibrio sp.	A0A2D8Z044	Magnetovibrio sp.
A0A2D8Z044	Magnetovibrio sp.	A0A2D9F5F1	Rhodospirillaceae bacterium
A0A2D8Z044	Magnetovibrio sp.	A0A2E3P7Z9	Magnetovibrio sp.
A0A2D8Z044	Magnetovibrio sp.	A0A2M7GTA9	Rhodospirillales bacterium CG15_BIG_FIL_POST_REV_8
A0A2D8Z044	Magnetovibrio sp.	A0A352GQS0	Rhodospirillaceae bacterium
A0A2E0BLG1	Rhodobacteraceae bacterium	A0A2E0BLG1	Rhodobacteraceae bacterium
A0A2E0E6U5	Rhodobacteraceae bacterium	A0A2E0E6U5	Rhodobacteraceae bacterium
A0A2E3AM04	Chloroflexi bacterium	A0A2E3AM04	Chloroflexi bacterium
A0A2E3K6V1	Rhodospirillaceae bacterium	A0A2E3K6V1	Rhodospirillaceae bacterium
A0A2E3KYM2	Magnetovibrio sp.	A0A2E3KYM2	Magnetovibrio sp.
A0A2E3KYM2	Magnetovibrio sp.	A0A2E8U5F2	Magnetovibrio sp.
A0A2E3YJZ2	Gammaproteobacteria bacterium	A0A2E3YJZ2	Gammaproteobacteria bacterium
A0A2E3YJZ2	Gammaproteobacteria bacterium	A0A2E5NJD7	Rhodospirillaceae bacterium
A0A2E3YJZ2	Gammaproteobacteria bacterium	A0A382GSP3	marine metagenome
A0A2E3ZLX7	Rhodospirillaceae bacterium	A0A2E3ZLX7	Rhodospirillaceae bacterium
A0A2E3ZLX7	Rhodospirillaceae bacterium	A0A2E5V2J7	Rhodospirillaceae bacterium
A0A2E5PP96	Rhodospirillaceae bacterium	A0A2E5PP96	Rhodospirillaceae bacterium
A0A2E6X3T8	Magnetovibrio sp.	A0A2E6X3T8	Magnetovibrio sp.
A0A2E7QU53	Rhodospirillaceae bacterium	A0A2E7QU53	Rhodospirillaceae bacterium
A0A2E7V397	Rickettsiales bacterium	A0A2E4H0L4	Rhodospirillaceae bacterium
A0A2E7V397	Rickettsiales bacterium	A0A2E4XRB2	Rhodospirillaceae bacterium
A0A2E7V397	Rickettsiales bacterium	A0A2E7V397	Rickettsiales bacterium
A0A2E8RA39	Chloroflexi bacterium	A0A2E8RA39	Chloroflexi bacterium
A0A2E8V959	Dehalococcoidia bacterium	A0A2E8V959	Dehalococcoidia bacterium
A0A2E9EBE0	Gammaproteobacteria bacterium	A0A2E9EBE0	Gammaproteobacteria bacterium
A0A2G8BER5	Mycobacterium heckeshornense	A0A1X0GUU2	Mycobacterium noviomagense
A0A2G8BER5	Mycobacterium heckeshornense	A0A2G8BER5	Mycobacterium heckeshornense
A0A2G8BER5	Mycobacterium heckeshornense	A0A2X1U8L6	Mycobacterium xenopi
A0A2G8BER5	Mycobacterium heckeshornense	I0RDE2	Mycobacterium xenopi RIVM700367
A0A2G8T3T5	Massilia psychrophila	A0A0Q6W4J7	Massilia sp. Root351
A0A2G8T3T5	Massilia psychrophila	A0A0Q7EQ44	Massilia sp. Root418
A0A2G8T3T5	Massilia psychrophila	A0A2G8T3T5	Massilia psychrophila
A0A2G8T3T5	Massilia psychrophila	A0A2T5T9L8	Massilia sp. GV045
A0A2H6IZH8	bacterium BMS3Bbin10	A0A2H6IZH8	bacterium BMS3Bbin10
A0A2I0SDU9	Streptomyces populi	A0A0F5W5U6	Streptomyces sp. WM6386
A0A2I0SDU9	Streptomyces populi	A0A0K8PLZ8	Streptomyces azureus
A0A2I0SDU9	Streptomyces populi	A0A0Q6XZB4	Streptomyces sp. Root369
A0A2I0SDU9	Streptomyces populi	A0A101P976	Streptomyces canus
A0A2I0SDU9	Streptomyces populi	A0A101RTK7	Streptomyces canus
A0A2I0SDU9	Streptomyces populi	A0A101S4I8	Streptomyces griseorubiginosus
A0A2I0SDU9	Streptomyces populi	A0A117PRF4	Streptomyces pseudovenezuelae
A0A2I0SDU9	Streptomyces populi	A0A124HLJ0	Streptomyces antibioticus
A0A2I0SDU9	Streptomyces populi	A0A1C5C3M6	Streptomyces sp. MnatMP-M17
A0A2I0SDU9	Streptomyces populi	A0A1Q9SU08	Pseudonocardia sp. CNS-139
A0A2I0SDU9	Streptomyces populi	A0A1V4E108	Streptomyces sp. GKU 895
A0A2I0SDU9	Streptomyces populi	A0A1V9KHX2	Streptomyces sp. M41(2017)
A0A2I0SDU9	Streptomyces populi	A0A239KMG1	Streptomyces glauciniger
A0A2I0SDU9	Streptomyces populi	A0A243S068	Streptomyces swartbergensis
A0A2I0SDU9	Streptomyces populi	A0A285CCP7	Streptomyces sp. TLI_55
A0A2I0SDU9	Streptomyces populi	A0A2G5IPZ9	Streptomyces sp. HG99
A0A2I0SDU9	Streptomyces populi	A0A2I0SDU9	Streptomyces populi
A0A2I0SDU9	Streptomyces populi	A0A2T7T1V9	Streptomyces scopuliridis RB72
A0A2I0SDU9	Streptomyces populi	A0A2U2ZPM2	Streptomyces sp. Act143
A0A2I0SDU9	Streptomyces populi	B5I9A5	Streptomyces sviceus ATCC 29083
A0A2I0SDU9	Streptomyces populi	L7EZG8	Streptomyces turgidiscabies Car8
A0A2I6E5U9	Enterobacter cancerogenus	A0A2I6E5U9	Enterobacter cancerogenus
A0A2I6E5U9	Enterobacter cancerogenus	A0A2J7P3D2	Enterobacter cancerogenus
A0A2I6S3H0	Azoarcus sp. SY39	A0A2I6S3H0	Azoarcus sp. SY39
A0A2I7W2X6	Mycobacterium tuberculosis	A0A0Q3YTU4	Mycobacterium tuberculosis
A0A2I7W2X6	Mycobacterium tuberculosis	A0A0T5YD66	Mycobacterium tuberculosis
A0A2I7W2X6	Mycobacterium tuberculosis	A0A0U0QFE5	Mycobacterium tuberculosis
A0A2I7W2X6	Mycobacterium tuberculosis	A0A0U0QNG8	Mycobacterium tuberculosis
A0A2I7W2X6	Mycobacterium tuberculosis	A0A0U0R3U3	Mycobacterium tuberculosis
A0A2I7W2X6	Mycobacterium tuberculosis	A0A2I7W2X6	Mycobacterium tuberculosis
A0A2I7W2X6	Mycobacterium tuberculosis	A0A2Z4TXA6	Mycobacterium tuberculosis
A0A2I7W2X6	Mycobacterium tuberculosis	G0TMD2	Mycobacterium canettii CIPT 140010059
A0A2I9E0W8	Rhodococcus sp. Br-6	A0A2I9E0W8	Rhodococcus sp. Br-6
A0A2I9E0W8	Rhodococcus sp. Br-6	A0A2R3S787	Rhodococcus hoagii
A0A2I9E0W8	Rhodococcus sp. Br-6	A0A370FWV2	Rhodococcus sp. AG1013
A0A2I9E0W8	Rhodococcus sp. Br-6	F1TJQ3	Rhodococcus hoagii ATCC 33707
A0A2R8BNX6	Defluviimonas aquaemixtae	A0A2R8BNX6	Defluviimonas aquaemixtae
A0A2S3QFJ6	Sulfobacillus sp. hq2	A0A2S3QFJ6	Sulfobacillus sp. hq2
A0A2S4DHR4	Candidatus Entotheonella serta	A0A2E6GQZ9	Rhodospirillaceae bacterium
A0A2S4DHR4	Candidatus Entotheonella serta	A0A2S4DHR4	Candidatus Entotheonella serta
A0A2S4DHR4	Candidatus Entotheonella serta	A0A2S6UGT6	Alphaproteobacteria bacterium MarineAlpha4_Bin1
A0A2S4DHR4	Candidatus Entotheonella serta	W4LFJ8	Candidatus Entotheonella factor
A0A2S4DHR4	Candidatus Entotheonella serta	W4M1I0	Candidatus Entotheonella gemina
A0A2S4XQN2	Streptomyces sp. Ru73	A0A2S4XQN2	Streptomyces sp. Ru73
A0A2S6TV96	Alphaproteobacteria bacterium MarineAlpha4_Bin2	A0A2S6TV96	Alphaproteobacteria bacterium MarineAlpha4_Bin2
A0A2T0JYP4	Actinoplanes italicus	A0A2N3S177	Plantactinospora sp. CNZ320
A0A2T0JYP4	Actinoplanes italicus	A0A2R4FER5	Plantactinospora sp. BB1
A0A2T0JYP4	Actinoplanes italicus	A0A2T0JYP4	Actinoplanes italicus
A0A2T2WJH2	Sulfobacillus acidophilus	A0A2T2WJH2	Sulfobacillus acidophilus
A0A2T2WXE1	Sulfobacillus benefaciens	A0A2T2WXE1	Sulfobacillus benefaciens
A0A2T2XHJ8	Sulfobacillus benefaciens	A0A2T2XHJ8	Sulfobacillus benefaciens
A0A2T5L6K3	Rhodococcus sp. OK519	A0A2T5L6K3	Rhodococcus sp. OK519
A0A2T6MZ52	gamma proteobacterium symbiont of Ctena orbiculata	A0A2T6MZ52	gamma proteobacterium symbiont of Ctena orbiculata
A0A2T7T773	Streptomyces scopuliridis RB72	A0A2T7T773	Streptomyces scopuliridis RB72
A0A2U1RRX4	Betaproteobacteria bacterium	A0A2U1RRX4	Betaproteobacteria bacterium
A0A2U8VQA6	Methylobacterium sp. 17Sr1-43	A0A089P2P8	Methylobacterium oryzae CBMB20
A0A2U8VQA6	Methylobacterium sp. 17Sr1-43	A0A0E9K924	Methylobacterium sp. ME121
A0A2U8VQA6	Methylobacterium sp. 17Sr1-43	A0A0L6JAX7	Methylobacterium sp. ARG-1
A0A2U8VQA6	Methylobacterium sp. 17Sr1-43	A0A0N0B8V8	Streptomyces purpurogeneiscleroticus
A0A2U8VQA6	Methylobacterium sp. 17Sr1-43	A0A0Q4WP05	Methylobacterium sp. Leaf90
A0A2U8VQA6	Methylobacterium sp. 17Sr1-43	A0A0Q5CCQ4	Methylobacterium sp. Leaf123
A0A2U8VQA6	Methylobacterium sp. 17Sr1-43	A0A0Q6BXL8	Methylobacterium sp. Leaf456
A0A2U8VQA6	Methylobacterium sp. 17Sr1-43	A0A0V7Z1Q2	Methylobacterium sp. GXS13
A0A2U8VQA6	Methylobacterium sp. 17Sr1-43	A0A0X1SED6	Methylobacterium sp. AMS5
A0A2U8VQA6	Methylobacterium sp. 17Sr1-43	A0A160PBQ8	Methylorubrum populi
A0A2U8VQA6	Methylobacterium sp. 17Sr1-43	A0A177J9R6	Methylorubrum populi
A0A2U8VQA6	Methylobacterium sp. 17Sr1-43	A0A1G5UAN3	Methylobacterium sp. UNC378MF
A0A2U8VQA6	Methylobacterium sp. 17Sr1-43	A0A1G9QYX4	Methylobacterium phyllostachyos
A0A2U8VQA6	Methylobacterium sp. 17Sr1-43	A0A1I3LQD0	Methylobacterium brachiatum
A0A2U8VQA6	Methylobacterium sp. 17Sr1-43	A0A1I4DM49	Methylorubrum salsuginis
A0A2U8VQA6	Methylobacterium sp. 17Sr1-43	A0A1I4MVW6	Methylobacterium pseudosasicola
A0A2U8VQA6	Methylobacterium sp. 17Sr1-43	A0A1I6QHS6	Methylobacterium sp. yr668
A0A2U8VQA6	Methylobacterium sp. 17Sr1-43	A0A1I7JQ13	Methylobacterium sp. UNCCL125
A0A2U8VQA6	Methylobacterium sp. 17Sr1-43	A0A1S1P3L3	Methylorubrum extorquens
A0A2U8VQA6	Methylobacterium sp. 17Sr1-43	A0A2E7YC83	Methylobacterium sp.
A0A2U8VQA6	Methylobacterium sp. 17Sr1-43	A0A2H6BEV5	Methylopila sp. Yamaguchi
A0A2U8VQA6	Methylobacterium sp. 17Sr1-43	A0A2U8HPP8	Methylobacterium sp. DM1
A0A2U8VQA6	Methylobacterium sp. 17Sr1-43	A0A2U8VQA6	Methylobacterium sp. 17Sr1-43
A0A2U8VQA6	Methylobacterium sp. 17Sr1-43	A0A2U9TRX6	Methylobacterium sp. XJLM
A0A2U8VQA6	Methylobacterium sp. 17Sr1-43	A0A2V3U668	Methylobacterium sp. B4
A0A2U8VQA6	Methylobacterium sp. 17Sr1-43	C7CIG2	Methylorubrum extorquens DM4
A0A2U8VQA6	Methylobacterium sp. 17Sr1-43	I9WR81	Methylobacterium sp. GXF4
A0A2U8VQA6	Methylobacterium sp. 17Sr1-43	M7XZU6	Methylobacterium mesophilicum SR1.6/6
A0A2V1J2C8	Muribaculaceae bacterium DSM 100764	A0A2V1J2C8	Muribaculaceae bacterium DSM 100764
A0A2V7C4S1	Candidatus Rokubacteria bacterium	A0A2V7C4S1	Candidatus Rokubacteria bacterium
A0A2V7C4S1	Candidatus Rokubacteria bacterium	A0A2V9RKG3	Acidobacteria bacterium
A0A2W4KBN5	Proteobacteria bacterium	A0A2W4KBN5	Proteobacteria bacterium
A0A2W4KZF3	Proteobacteria bacterium	A0A2W4KZF3	Proteobacteria bacterium
A0A2W4KZF3	Proteobacteria bacterium	A0A2W4TEU2	Proteobacteria bacterium
A0A2W5KJT8	Starkeya novella	A0A2W5KJT8	Starkeya novella
A0A2Y9A191	Branchiibius hedensis	A0A2Y9A191	Branchiibius hedensis
A0A2Z4W0N1	Lactobacillus murinus	A0A2Z4W0N1	Lactobacillus murinus
A0A2Z4W0N1	Lactobacillus murinus	A0A358LW50	Lactobacillus sp.
A0A2Z4W0N1	Lactobacillus murinus	N1ZR42	Lactobacillus murinus ASF361
A0A2Z6T7D7	Lactobacillus rodentium	A0A2Z6T7D7	Lactobacillus rodentium
A0A328X7C8	Paraburkholderia unamae	A0A328X7C8	Paraburkholderia unamae
A0A328XDX1	Paraburkholderia unamae	A0A038GTF4	Caballeronia jiangsuensis
A0A328XDX1	Paraburkholderia unamae	A0A060P5T9	Burkholderia sp. RPE67
A0A328XDX1	Paraburkholderia unamae	A0A0A6QDZ4	Paraburkholderia sacchari
A0A328XDX1	Paraburkholderia unamae	A0A0D5VMC8	Paraburkholderia fungorum
A0A328XDX1	Paraburkholderia unamae	A0A149PT79	Caballeronia megalochromosomata
A0A328XDX1	Paraburkholderia unamae	A0A158BUA1	Caballeronia hypogeia
A0A328XDX1	Paraburkholderia unamae	A0A158C1D1	Caballeronia fortuita
A0A328XDX1	Paraburkholderia unamae	A0A158DN16	Caballeronia pedi
A0A328XDX1	Paraburkholderia unamae	A0A158DQ52	Caballeronia calidae
A0A328XDX1	Paraburkholderia unamae	A0A158ILJ5	Caballeronia cordobensis
A0A328XDX1	Paraburkholderia unamae	A0A158ISQ7	Caballeronia terrestris
A0A328XDX1	Paraburkholderia unamae	A0A158IZV5	Caballeronia humi
A0A328XDX1	Paraburkholderia unamae	A0A158KAQ3	Caballeronia choica
A0A328XDX1	Paraburkholderia unamae	A0A160FV15	Burkholderia sp. OLGA172
A0A328XDX1	Paraburkholderia unamae	A0A1A9MZ86	Paraburkholderia ginsengiterrae
A0A328XDX1	Paraburkholderia unamae	A0A1G6L758	Burkholderia sp. TNe-862
A0A328XDX1	Paraburkholderia unamae	A0A1H1JMX8	Paraburkholderia fungorum
A0A328XDX1	Paraburkholderia unamae	A0A1H4GUT3	Paraburkholderia sartisoli
A0A328XDX1	Paraburkholderia unamae	A0A1L6HT58	Paraburkholderia sp. SOS3
A0A328XDX1	Paraburkholderia unamae	A0A1M6NH69	Paraburkholderia terricola
A0A328XDX1	Paraburkholderia unamae	A0A1N6JWF1	Paraburkholderia phenazinium
A0A328XDX1	Paraburkholderia unamae	A0A1X0MW18	Burkholderia sp. A27
A0A328XDX1	Paraburkholderia unamae	A0A221A170	Burkholderia sp. AD24
A0A328XDX1	Paraburkholderia unamae	A0A2N8Q8T5	Paraburkholderia fungorum
A0A328XDX1	Paraburkholderia unamae	A0A2S4M3T6	Paraburkholderia eburnea
A0A328XDX1	Paraburkholderia unamae	A0A2T0KTZ0	Paraburkholderia sp. BL18I3N2
A0A328XDX1	Paraburkholderia unamae	A0A2T0QKM8	Paraburkholderia sp. BL25I1N1
A0A328XDX1	Paraburkholderia unamae	A0A2U3IFG8	Burkholderia novacaledonica
A0A328XDX1	Paraburkholderia unamae	A0A328XDX1	Paraburkholderia unamae
A0A328XDX1	Paraburkholderia unamae	A0A329BDN9	Paraburkholderia bryophila
A0A328XDX1	Paraburkholderia unamae	A0A329DGA7	Burkholderia sp. yr520
A0A328XDX1	Paraburkholderia unamae	A0A346B610	Paraburkholderia caffeinilytica
A0A328XDX1	Paraburkholderia unamae	B2T9D2	Paraburkholderia phytofirmans PsJN
A0A328XDX1	Paraburkholderia unamae	D5WNJ7	Burkholderia sp. CCGE1002
A0A328XDX1	Paraburkholderia unamae	K8RLH9	Burkholderia sp. SJ98
A0A328XDX1	Paraburkholderia unamae	R4WPL1	Burkholderia insecticola
A0A346R3F3	Breoghania sp. L-A4	A0A346R3F3	Breoghania sp. L-A4
A0A353DT13	Dehalococcoidia bacterium	A0A2D9LMA1	Chloroflexi bacterium
A0A353DT13	Dehalococcoidia bacterium	A0A2E6ZQA1	Chloroflexi bacterium
A0A353DT13	Dehalococcoidia bacterium	A0A2E8X7N8	Chloroflexi bacterium
A0A353DT13	Dehalococcoidia bacterium	A0A2W1AST6	Chloroflexi bacterium
A0A353DT13	Dehalococcoidia bacterium	A0A353DT13	Dehalococcoidia bacterium
A0A353DT13	Dehalococcoidia bacterium	A0A381RKV7	marine metagenome
A0A355WIV9	Rhodobacteraceae bacterium	A0A355WIV9	Rhodobacteraceae bacterium
A0A355Z630	Porphyromonadaceae bacterium	A0A2V1IRU2	Muribaculaceae bacterium DSM 103720
A0A355Z630	Porphyromonadaceae bacterium	A0A354HZQ6	Porphyromonadaceae bacterium
A0A355Z630	Porphyromonadaceae bacterium	A0A355Z630	Porphyromonadaceae bacterium
A0A365HCT5	Actinomadura sp. LHW63021	A0A365HCT5	Actinomadura sp. LHW63021
A0A365NR49	Herminiimonas fonticola	A0A365NR49	Herminiimonas fonticola
A0A365NR49	Herminiimonas fonticola	A4G240	Herminiimonas arsenicoxydans
A0A365NR49	Herminiimonas fonticola	A6SUZ2	Janthinobacterium sp. Marseille
A0A368A7F9	Acetobacter pasteurianus	A0A063X7E6	Acetobacter aceti 1023
A0A368A7F9	Acetobacter pasteurianus	A0A149USA4	Acetobacter malorum
A0A368A7F9	Acetobacter pasteurianus	A0A1A0DAZ7	Acetobacter pasteurianus
A0A368A7F9	Acetobacter pasteurianus	A0A1Y0V990	Acetobacter ascendens
A0A368A7F9	Acetobacter pasteurianus	A0A2G4RE19	Acetobacter pomorum
A0A368A7F9	Acetobacter pasteurianus	A0A346DYP3	Acetobacter pomorum
A0A368A7F9	Acetobacter pasteurianus	A0A368A7F9	Acetobacter pasteurianus
A0A368A7F9	Acetobacter pasteurianus	A0A368AD84	Acetobacter sp. BCRC 14118
A0A368A7F9	Acetobacter pasteurianus	C7JBA7	Acetobacter pasteurianus IFO 3283-01
A0A368A7F9	Acetobacter pasteurianus	S6D5K8	Acetobacter pasteurianus 386B
A0A375YD27	Mycolicibacterium parafortuitum	A0A2S7N7J5	Mycobacterium sp. EPG1
A0A375YD27	Mycolicibacterium parafortuitum	A0A375YD27	Mycolicibacterium parafortuitum
A0A378TH96	Mycolicibacterium tokaiense	A0A1B1WPM9	Mycobacterium sp. djl-10
A0A378TH96	Mycolicibacterium tokaiense	A0A378TH96	Mycolicibacterium tokaiense
A4PE17	Lactobacillus acidophilus	A0A0R1HA15	Lactobacillus amylovorus DSM 20531
A4PE17	Lactobacillus acidophilus	A0A0R2KYZ0	Lactobacillus amylovorus DSM 16698
A4PE17	Lactobacillus acidophilus	A0A0U0XH73	Chlamydia trachomatis
A4PE17	Lactobacillus acidophilus	A0A135Z5P5	Lactobacillus crispatus
A4PE17	Lactobacillus acidophilus	A0A1G5V2A3	Lactobacillus kefiranofaciens
A4PE17	Lactobacillus acidophilus	A0A356SWD8	Lactobacillus sp.
A4PE17	Lactobacillus acidophilus	A0A378H7I7	Lactobacillus acidophilus
A4PE17	Lactobacillus acidophilus	A4PE17	Lactobacillus acidophilus
A4PE17	Lactobacillus acidophilus	C2ER51	Lactobacillus ultunensis DSM 16047
A4PE17	Lactobacillus acidophilus	Q5FLY7	Lactobacillus acidophilus NCFM
A7ICK1	Xanthobacter autotrophicus Py2	A0A1G4TYG0	Ancylobacter rudongensis
A7ICK1	Xanthobacter autotrophicus Py2	A0A257ZQA0	Rhizobiales bacterium 12-68-15
A7ICK1	Xanthobacter autotrophicus Py2	A0A2C9DDK2	Hartmannibacter diazotrophicus
A7ICK1	Xanthobacter autotrophicus Py2	A0A2W5R6P8	Starkeya novella
A7ICK1	Xanthobacter autotrophicus Py2	A7ICK1	Xanthobacter autotrophicus Py2
A7ICK1	Xanthobacter autotrophicus Py2	A8IM19	Azorhizobium caulinodans ORS 571
A7ICK1	Xanthobacter autotrophicus Py2	D7A6Q7	Starkeya novella DSM 506
A8TPV5	alpha proteobacterium BAL199	A8TPV5	alpha proteobacterium BAL199
B0UIN7	Methylobacterium sp. 4-46	A0A2M6XQN7	Methylobacterium sp. CG09_land_8_20_14_0_10_71_15
B0UIN7	Methylobacterium sp. 4-46	B0UIN7	Methylobacterium sp. 4-46
B0UIN7	Methylobacterium sp. 4-46	B8IFZ0	Methylobacterium nodulans ORS 2060
B6JE30	Oligotropha carboxidovorans OM5	A0A1Q3W5U3	Afipia sp. 64-13
B6JE30	Oligotropha carboxidovorans OM5	A0A380W9B0	Afipia felis
B6JE30	Oligotropha carboxidovorans OM5	B6JE30	Oligotropha carboxidovorans OM5
B6JE30	Oligotropha carboxidovorans OM5	D6V5L3	Afipia sp. 1NLS2
B9NWG2	Rhodobacteraceae bacterium KLH11	A0A316G9R4	Silicimonas algicola
B9NWG2	Rhodobacteraceae bacterium KLH11	B9NWG2	Rhodobacteraceae bacterium KLH11
C0BUX4	Bifidobacterium pseudocatenulatum DSM 20438 = JCM	A0A072MUW5	Bifidobacterium pseudocatenulatum IPLA36007
C0BUX4	Bifidobacterium pseudocatenulatum DSM 20438 = JCM	A0A174BGS6	Bifidobacterium pseudocatenulatum
C0BUX4	Bifidobacterium pseudocatenulatum DSM 20438 = JCM	A0A1Q6EPG9	Bifidobacterium sp. 56_9_plus
C0BUX4	Bifidobacterium pseudocatenulatum DSM 20438 = JCM	A0A1V8Q5U8	Bifidobacterium dentium
C0BUX4	Bifidobacterium pseudocatenulatum DSM 20438 = JCM	A0A267WLW4	Bifidobacterium pseudocatenulatum
C0BUX4	Bifidobacterium pseudocatenulatum DSM 20438 = JCM	A0A2G5PSE7	Bifidobacterium sp. N5G01
C0BUX4	Bifidobacterium pseudocatenulatum DSM 20438 = JCM	A0A354QN30	Bifidobacterium dentium
C0BUX4	Bifidobacterium pseudocatenulatum DSM 20438 = JCM	A0A374MR30	Bifidobacterium pseudocatenulatum
C0BUX4	Bifidobacterium pseudocatenulatum DSM 20438 = JCM	C0BUX4	Bifidobacterium pseudocatenulatum DSM 20438 = JCM
C0BUX4	Bifidobacterium pseudocatenulatum DSM 20438 = JCM	D2Q6H6	Bifidobacterium dentium Bd1
C0BUX4	Bifidobacterium pseudocatenulatum DSM 20438 = JCM	R6P3X8	Bifidobacterium pseudocatenulatum CAG:263
C3X545	Oxalobacter formigenes HOxBLS	C3X545	Oxalobacter formigenes HOxBLS
C3X545	Oxalobacter formigenes HOxBLS	C3XBB9	Oxalobacter formigenes OXCC13
D1NS77	Bifidobacterium gallicum DSM 20093 = LMG 11596	A0A087BCM4	Bifidobacterium magnum
D1NS77	Bifidobacterium gallicum DSM 20093 = LMG 11596	D1NS77	Bifidobacterium gallicum DSM 20093 = LMG 11596
E0MTY7	Ahrensia sp. R2A130	E0MTY7	Ahrensia sp. R2A130
E0QAM8	Bifidobacterium dentium ATCC 27679	E0QAM8	Bifidobacterium dentium ATCC 27679
E0QAM8	Bifidobacterium dentium ATCC 27679	W2VF70	Bifidobacterium sp. MSTE12
E0QAM8	Bifidobacterium dentium ATCC 27679	W4NBB4	Bifidobacterium moukalabense DSM 27321
E6PRM5	mine drainage metagenome	A0A2S8RLC4	Paraburkholderia sp. BL21I4N1
E6PRM5	mine drainage metagenome	E6PRM5	mine drainage metagenome
G4I076	Mycolicibacterium rhodesiae JS60	A0A1U9PLV2	Mycolicibacterium litorale
G4I076	Mycolicibacterium rhodesiae JS60	A0A1X0IS82	Mycolicibacterium rhodesiae
G4I076	Mycolicibacterium rhodesiae JS60	A0A1Y5P763	uncultured Mycobacterium sp.
G4I076	Mycolicibacterium rhodesiae JS60	A0A2C9SRL6	Mycobacterium sp. shizuoka-1
G4I076	Mycolicibacterium rhodesiae JS60	A0A2T5WN07	Mycobacterium sp. YR782
G4I076	Mycolicibacterium rhodesiae JS60	G4I076	Mycolicibacterium rhodesiae JS60
Q73U45	Mycobacterium avium subsp. paratuberculosis K-10	A0A049DQK8	Mycobacterium avium XTB13-223
Q73U45	Mycobacterium avium subsp. paratuberculosis K-10	A0A081I4P2	Mycobacterium sp. TKK-01-0059
Q73U45	Mycobacterium avium subsp. paratuberculosis K-10	A0A0E2WJI9	Mycobacterium avium subsp. hominissuis A5
Q73U45	Mycobacterium avium subsp. paratuberculosis K-10	A0A1A1VTR8	Mycobacterium sp. 852002-10029_SCH5224772
Q73U45	Mycobacterium avium subsp. paratuberculosis K-10	A0A1A2R0J9	Mycobacterium colombiense
Q73U45	Mycobacterium avium subsp. paratuberculosis K-10	A0A1A3JFB3	Mycobacterium asiaticum
Q73U45	Mycobacterium avium subsp. paratuberculosis K-10	A0A1B7U2T0	Mycobacterium sp. 852002-40037_SCH5390672
Q73U45	Mycobacterium avium subsp. paratuberculosis K-10	A0A1B9C890	Mycobacterium intracellulare subsp. yongonense
Q73U45	Mycobacterium avium subsp. paratuberculosis K-10	A0A1X0CA49	Mycobacterium bouchedurhonense
Q73U45	Mycobacterium avium subsp. paratuberculosis K-10	A0A1X2KVS5	Mycobacterium paraintracellulare
Q73U45	Mycobacterium avium subsp. paratuberculosis K-10	A0A1Y0TGJ9	Mycobacterium chimaera
Q73U45	Mycobacterium avium subsp. paratuberculosis K-10	A0A1Z4EBT0	Mycobacterium shigaense
Q73U45	Mycobacterium avium subsp. paratuberculosis K-10	A0A202FPJ5	Mycobacterium avium subsp. paratuberculosis
Q73U45	Mycobacterium avium subsp. paratuberculosis K-10	A0A249CAJ7	Mycobacterium chimaera
Q73U45	Mycobacterium avium subsp. paratuberculosis K-10	A0A2A2ZBN5	Mycobacterium avium
Q73U45	Mycobacterium avium subsp. paratuberculosis K-10	A0A2A2ZRE7	Mycobacterium avium
Q73U45	Mycobacterium avium subsp. paratuberculosis K-10	A0A2U2DZS0	Mycobacterium avium subsp. hominissuis
Q73U45	Mycobacterium avium subsp. paratuberculosis K-10	A0A329KT98	Mycobacterium colombiense
Q73U45	Mycobacterium avium subsp. paratuberculosis K-10	H8IJH4	Mycobacterium intracellulare ATCC 13950
Q73U45	Mycobacterium avium subsp. paratuberculosis K-10	I2AL03	Mycobacterium sp. MOTT36Y
Q73U45	Mycobacterium avium subsp. paratuberculosis K-10	Q73U45	Mycobacterium avium subsp. paratuberculosis K-10
Q73U45	Mycobacterium avium subsp. paratuberculosis K-10	S4ZJD8	Mycobacterium intracellulare subsp. yongonense 05-
Q73U45	Mycobacterium avium subsp. paratuberculosis K-10	T2GZA9	Mycobacterium avium subsp. hominissuis TH135
Q73U45	Mycobacterium avium subsp. paratuberculosis K-10	V7KW19	Mycobacterium avium subsp. paratuberculosis 08-828
Q73U45	Mycobacterium avium subsp. paratuberculosis K-10	V7KYM9	Mycobacterium avium subsp. silvaticum ATCC 49884
Q73U45	Mycobacterium avium subsp. paratuberculosis K-10	V7LG93	Mycobacterium avium subsp. avium 10-9275
Q73U45	Mycobacterium avium subsp. paratuberculosis K-10	X8AE51	Mycobacterium intracellulare
R5AVJ0	Prevotella sp. CAG:1031	R5AVJ0	Prevotella sp. CAG:1031
R9KTR6	Enterorhabdus caecimuris B7	R9KTR6	Enterorhabdus caecimuris B7
U7V560	Cetobacterium somerae ATCC BAA-474	U7V560	Cetobacterium somerae ATCC BAA-474
V4RUG6	Lutibaculum baratangense AMV1	V4RUG6	Lutibaculum baratangense AMV1

## Sheet: oxdd
centroid	centroid_taxa	member	member_taxa
A0A010RDL5	Colletotrichum fioriniae PJ7	A0A010RDL5	Colletotrichum fioriniae PJ7
A0A010RDL5	Colletotrichum fioriniae PJ7	A0A135RRQ0	Colletotrichum salicis
A0A010RDL5	Colletotrichum fioriniae PJ7	A0A135SWA4	Colletotrichum simmondsii
A0A010RDL5	Colletotrichum fioriniae PJ7	A0A1G4AZI9	Colletotrichum orchidophilum
A0A010RDL5	Colletotrichum fioriniae PJ7	L2G455	Colletotrichum gloeosporioides Nara gc5
A0A010RDL5	Colletotrichum fioriniae PJ7	T0M6B0	Colletotrichum gloeosporioides Cg-14
A0A022PP07	Photorhabdus luminescens BA1	A0A022PP07	Photorhabdus luminescens BA1
A0A022PP07	Photorhabdus luminescens BA1	A0A0A0CVI0	Photorhabdus luminescens
A0A022PP07	Photorhabdus luminescens BA1	A0A0F7LRH6	Photorhabdus thracensis
A0A022PP07	Photorhabdus luminescens BA1	A0A0M9CWC9	Photorhabdus heterorhabditis
A0A022PP07	Photorhabdus luminescens BA1	A0A1B8YCX3	Photorhabdus namnaonensis
A0A022PP07	Photorhabdus luminescens BA1	A0A1C0U8Y5	Photorhabdus australis
A0A022PP07	Photorhabdus luminescens BA1	A0A1G5PQD6	Photorhabdus luminescens
A0A022PP07	Photorhabdus luminescens BA1	A0A254MEE6	Photorhabdus luminescens
A0A022PP07	Photorhabdus luminescens BA1	A0A2S8Q382	Photorhabdus luminescens
A0A022PP07	Photorhabdus luminescens BA1	A0A2S8QEJ2	Photorhabdus luminescens
A0A022PP07	Photorhabdus luminescens BA1	A0A2S8QVW7	Photorhabdus luminescens
A0A022PP07	Photorhabdus luminescens BA1	A0A329V4N8
A0A022PP07	Photorhabdus luminescens BA1	A0A329VMT4
A0A022PP07	Photorhabdus luminescens BA1	A0A329VRU0
A0A022PP07	Photorhabdus luminescens BA1	A0A329WUK8
A0A022PP07	Photorhabdus luminescens BA1	A0A329XC07
A0A022PP07	Photorhabdus luminescens BA1	B6VKU5	Photorhabdus asymbiotica subsp. asymbiotica ATCC 4
A0A022PP07	Photorhabdus luminescens BA1	G1ELY9	Photorhabdus luminescens
A0A022PP07	Photorhabdus luminescens BA1	T0QHK5	Photorhabdus temperata subsp. temperata M1021
A0A022PP07	Photorhabdus luminescens BA1	W3V4T3	Photorhabdus khanii NC19
A0A022VXJ4	Trichophyton rubrum CBS 288.86	A0A022VXJ4	Trichophyton rubrum CBS 288.86
A0A023XB34	Bradyrhizobium japonicum SEMIA 5079	A0A023XB34	Bradyrhizobium japonicum SEMIA 5079
A0A023XB34	Bradyrhizobium japonicum SEMIA 5079	A0A2T2QCP0	Bradyrhizobium sp. MOS002
A0A023XJB5	Bradyrhizobium japonicum SEMIA 5079	A0A023XJB5	Bradyrhizobium japonicum SEMIA 5079
A0A023XS43	Bradyrhizobium japonicum SEMIA 5079	A0A023XS43	Bradyrhizobium japonicum SEMIA 5079
A0A023XS43	Bradyrhizobium japonicum SEMIA 5079	G7D1R9	Bradyrhizobium japonicum USDA 6
A0A060SLA1	Trametes cinnabarina	A0A060SLA1	Trametes cinnabarina
A0A060SLA1	Trametes cinnabarina	A0A1Y2J2S8	Trametes coccinea BRFM310
A0A060SMB0	Trametes cinnabarina	A0A060SMB0	Trametes cinnabarina
A0A060SN87	Trametes cinnabarina	A0A060SN87	Trametes cinnabarina
A0A060SRL8	Trametes cinnabarina	A0A060SRL8	Trametes cinnabarina
A0A060SRL8	Trametes cinnabarina	A0A1Y2IFB6	Trametes coccinea BRFM310
A0A063BRD8	Ustilaginoidea virens	A0A063BRD8	Ustilaginoidea virens
A0A063BRD8	Ustilaginoidea virens	A0A1B5KS70	Ustilaginoidea virens
A0A066VZX8	Rhizoctonia solani AG-8 WAC10335	A0A066VZX8	Rhizoctonia solani AG-8 WAC10335
A0A067LY23	Botryobasidium botryosum FD-172 SS1	A0A067LY23	Botryobasidium botryosum FD-172 SS1
A0A067N825	Pleurotus ostreatus PC15	A0A067N825	Pleurotus ostreatus PC15
A0A067NAB0	Pleurotus ostreatus PC15	A0A067NAB0	Pleurotus ostreatus PC15
A0A067NYJ7	Pleurotus ostreatus PC15	A0A067NYJ7	Pleurotus ostreatus PC15
A0A067Q076	Jaapia argillacea MUCL 33604	A0A067Q076	Jaapia argillacea MUCL 33604
A0A067Q6P3	Jaapia argillacea MUCL 33604	A0A067Q6P3	Jaapia argillacea MUCL 33604
A0A067SH37	Galerina marginata CBS 339.88	A0A067SH37	Galerina marginata CBS 339.88
A0A067TI65	Galerina marginata CBS 339.88	A0A067TI65	Galerina marginata CBS 339.88
A0A069PN28	Caballeronia glathei	A0A069PN28	Caballeronia glathei
A0A074VYZ4	Aureobasidium melanogenum CBS 110374	A0A074VYZ4	Aureobasidium melanogenum CBS 110374
A0A074VYZ4	Aureobasidium melanogenum CBS 110374	A0A074X5X4	Aureobasidium namibiae CBS 147.97
A0A074VYZ4	Aureobasidium melanogenum CBS 110374	A0A074YPX8	Aureobasidium pullulans EXF-150
A0A074WIM4	Aureobasidium melanogenum CBS 110374	A0A074WIM4	Aureobasidium melanogenum CBS 110374
A0A074WIM4	Aureobasidium melanogenum CBS 110374	A0A074WY47	Aureobasidium namibiae CBS 147.97
A0A074WIM4	Aureobasidium melanogenum CBS 110374	A0A074YG97	Aureobasidium pullulans EXF-150
A0A074WIM4	Aureobasidium melanogenum CBS 110374	A0A074Z020	Aureobasidium subglaciale EXF-2481
A0A075MQ85	Candidatus Nitrososphaera evergladensis SR1	A0A075MQ85	Candidatus Nitrososphaera evergladensis SR1
A0A081RVB5	Photorhabdus temperata subsp. temperata Meg1	A0A081RVB5	Photorhabdus temperata subsp. temperata Meg1
A0A084G085	Scedosporium apiospermum	A0A084G085	Scedosporium apiospermum
A0A084QKF1	Stachybotrys chlorohalonata IBT 40285	A0A084AT00	Stachybotrys chartarum IBT 7711
A0A084QKF1	Stachybotrys chlorohalonata IBT 40285	A0A084QKF1	Stachybotrys chlorohalonata IBT 40285
A0A084QKF1	Stachybotrys chlorohalonata IBT 40285	A0A084R8H8	Stachybotrys chartarum IBT 40288
A0A086T1X1	Acremonium chrysogenum ATCC 11550	A0A086T1X1	Acremonium chrysogenum ATCC 11550
A0A086T1X1	Acremonium chrysogenum ATCC 11550	A0A0B7JZS9	Clonostachys rosea
A0A090AJ95	Candidatus Tachikawaea gelatinosa	A0A090AJ95	Candidatus Tachikawaea gelatinosa
A0A090CY62	Criblamydia sequanensis CRIB-18	A0A090CY62	Criblamydia sequanensis CRIB-18
A0A093XMT1	Talaromyces marneffei PM1	A0A093XMT1	Talaromyces marneffei PM1
A0A093XMT1	Talaromyces marneffei PM1	A0A2H3J3Z5	Penicillium occitanis
A0A093XMT1	Talaromyces marneffei PM1	A0A364KV02
A0A093XMT1	Talaromyces marneffei PM1	B6QJ83	Talaromyces marneffei ATCC 18224
A0A094BG43	Pseudogymnoascus sp. VKM F-4513 (FW-928)	A0A093XNS3	Pseudogymnoascus sp. VKM F-3808
A0A094BG43	Pseudogymnoascus sp. VKM F-4513 (FW-928)	A0A093ZTZ6	Pseudogymnoascus sp. VKM F-3775
A0A094BG43	Pseudogymnoascus sp. VKM F-4513 (FW-928)	A0A094BG43	Pseudogymnoascus sp. VKM F-4513 (FW-928)
A0A094BG43	Pseudogymnoascus sp. VKM F-4513 (FW-928)	A0A094H8H4	Pseudogymnoascus sp. VKM F-103
A0A094BG43	Pseudogymnoascus sp. VKM F-4513 (FW-928)	A0A1B8D8Z6	Pseudogymnoascus sp. 24MN13
A0A094BG43	Pseudogymnoascus sp. VKM F-4513 (FW-928)	A0A1B8EJE7	Pseudogymnoascus sp. 05NY08
A0A094BG43	Pseudogymnoascus sp. VKM F-4513 (FW-928)	A0A1B8FDI2	Pseudogymnoascus sp. 03VT05
A0A094EKB2	Pseudogymnoascus sp. VKM F-4515 (FW-2607)	A0A093Y1E6	Pseudogymnoascus sp. VKM F-3557
A0A094EKB2	Pseudogymnoascus sp. VKM F-4515 (FW-2607)	A0A094B5W7	Pseudogymnoascus sp. VKM F-4281 (FW-2241)
A0A094EKB2	Pseudogymnoascus sp. VKM F-4515 (FW-2607)	A0A094EKB2	Pseudogymnoascus sp. VKM F-4515 (FW-2607)
A0A094EKB2	Pseudogymnoascus sp. VKM F-4515 (FW-2607)	A0A094G4B4	Pseudogymnoascus sp. VKM F-4517 (FW-2822)
A0A094EKB2	Pseudogymnoascus sp. VKM F-4515 (FW-2607)	A0A094GJ99	Pseudogymnoascus sp. VKM F-4518 (FW-2643)
A0A094EKB2	Pseudogymnoascus sp. VKM F-4515 (FW-2607)	A0A094GLW0	Pseudogymnoascus sp. VKM F-4520 (FW-2644)
A0A094EKB2	Pseudogymnoascus sp. VKM F-4515 (FW-2607)	A0A1B8BXK5	Pseudogymnoascus sp. WSF 3629
A0A094EKB2	Pseudogymnoascus sp. VKM F-4515 (FW-2607)	A0A1B8DV65	Pseudogymnoascus sp. 23342-1-I1
A0A094F8N4	Pseudogymnoascus sp. VKM F-103	A0A094F8N4	Pseudogymnoascus sp. VKM F-103
A0A094F8N4	Pseudogymnoascus sp. VKM F-103	A0A1B8D6S4	Pseudogymnoascus sp. 24MN13
A0A094F8N4	Pseudogymnoascus sp. VKM F-103	A0A1B8G936	Pseudogymnoascus verrucosus
A0A094H2V8	Pseudogymnoascus sp. VKM F-103	A0A094H2V8	Pseudogymnoascus sp. VKM F-103
A0A0A0D8U9	Inquilinus limosus MP06	A0A0A0D8U9	Inquilinus limosus MP06
A0A0A0D8U9	Inquilinus limosus MP06	A0A211ZUP0	Inquilinus limosus
A0A0A1SX28	Torrubiella hemipterigena	A0A0A1SX28	Torrubiella hemipterigena
A0A0A1T469	Torrubiella hemipterigena	A0A0A1T469	Torrubiella hemipterigena
A0A0A1V949	Metarhizium robertsii	A0A0A1V949	Metarhizium robertsii
A0A0A1V949	Metarhizium robertsii	A0A0B2X7L5	Metarhizium album ARSEF 1941
A0A0A1V949	Metarhizium robertsii	A0A0B4EJA1	Metarhizium anisopliae ARSEF 549
A0A0A1V949	Metarhizium robertsii	A0A0B4G711	Metarhizium brunneum ARSEF 3297
A0A0A1V949	Metarhizium robertsii	A0A0B4IC87	Metarhizium majus ARSEF 297
A0A0A1V949	Metarhizium robertsii	A0A0B4ICQ7	Metarhizium guizhouense ARSEF 977
A0A0A1V949	Metarhizium robertsii	A0A0D9PGN4	Metarhizium anisopliae BRIP 53293
A0A0A1V949	Metarhizium robertsii	A0A168BLI6	Moelleriella libera RCEF 2490
A0A0A1V949	Metarhizium robertsii	A0A179G7N1	Pochonia chlamydosporia 170
A0A0A1V949	Metarhizium robertsii	E9DVC2	Metarhizium acridum CQMa 102
A0A0A2JSC1	Penicillium expansum	A0A0A2JSC1	Penicillium expansum
A0A0A2JSC1	Penicillium expansum	A0A0A2LHD9	Penicillium italicum
A0A0A2JSC1	Penicillium expansum	A0A0G4PDW8	Penicillium camemberti FM 013
A0A0A2JSC1	Penicillium expansum	A0A0M9WH62	Penicillium nordicum
A0A0A2JSC1	Penicillium expansum	A0A124GQ76	Penicillium freii
A0A0A2JSC1	Penicillium expansum	A0A1V6N898	Penicillium polonicum
A0A0A2JSC1	Penicillium expansum	A0A1V6QVT3	Penicillium solitum
A0A0A2JSC1	Penicillium expansum	A0A1V6RX62	Penicillium vulpinum
A0A0A2JSC1	Penicillium expansum	A0A1V6SGZ5	Penicillium flavigenum
A0A0A2JSC1	Penicillium expansum	A0A1V6UDZ1	Penicillium coprophilum
A0A0A2JSC1	Penicillium expansum	A0A1V6YVL6	Penicillium nalgiovense
A0A0A2JSC1	Penicillium expansum	B6GY63	Penicillium rubens Wisconsin 54-1255
A0A0A2JSC1	Penicillium expansum	W6QG84	Penicillium roqueforti FM164
A0A0A2JTT7	Penicillium expansum	A0A0A2JTT7	Penicillium expansum
A0A0A2MK10	Flavobacterium rivuli WB 3.3-2 = DSM 21788	A0A0A2MK10	Flavobacterium rivuli WB 3.3-2 = DSM 21788
A0A0A2VDA4	Beauveria bassiana D1-5	A0A0A2VDA4	Beauveria bassiana D1-5
A0A0A2VDA4	Beauveria bassiana D1-5	A0A166WJT2	Cordyceps brongniartii RCEF 3172
A0A0A2VDA4	Beauveria bassiana D1-5	A0A167YIP4	Cordyceps confragosa RCEF 1005
A0A0A2VDA4	Beauveria bassiana D1-5	A0A179IH80	Cordyceps confragosa
A0A0A2VDA4	Beauveria bassiana D1-5	A0A2N6NVT4	Beauveria bassiana
A0A0A2VDA4	Beauveria bassiana D1-5	A0A2S7YE52	Beauveria bassiana
A0A0A2VDA4	Beauveria bassiana D1-5	J4KLC4	Beauveria bassiana ARSEF 2860
A0A0A2VQG2	Beauveria bassiana D1-5	A0A0A2VQG2	Beauveria bassiana D1-5
A0A0A2VQG2	Beauveria bassiana D1-5	A0A162KMM2	Cordyceps confragosa RCEF 1005
A0A0A2VQG2	Beauveria bassiana D1-5	A0A167CQG3	Cordyceps brongniartii RCEF 3172
A0A0A2VQG2	Beauveria bassiana D1-5	A0A167V290	Cordyceps fumosorosea ARSEF 2679
A0A0A2VQG2	Beauveria bassiana D1-5	A0A2H4SGT4	Cordyceps militaris
A0A0A2VQG2	Beauveria bassiana D1-5	A0A2N6NTZ1	Beauveria bassiana
A0A0A2VQG2	Beauveria bassiana D1-5	A0A2S7Y2F6	Beauveria bassiana
A0A0A2VQG2	Beauveria bassiana D1-5	G3J7L7	Cordyceps militaris CM01
A0A0A2VQG2	Beauveria bassiana D1-5	J4KQS0	Beauveria bassiana ARSEF 2860
A0A0A3Y812	Bradyrhizobium japonicum	A0A0A3Y812	Bradyrhizobium japonicum
A0A0A6XVH6	Bacillus ginsengihumi	A0A0A6XVH6	Bacillus ginsengihumi
A0A0A8JZA6	Methyloceanibacter caenitepidi	A0A0A8JZA6	Methyloceanibacter caenitepidi
A0A0A8JZA6	Methyloceanibacter caenitepidi	A0A1E3VSB6	Methyloceanibacter stevinii
A0A0A8K147	Methyloceanibacter caenitepidi	A0A0A8K147	Methyloceanibacter caenitepidi
A0A0B0DW65	Neurospora crassa	A0A0B0DW65	Neurospora crassa
A0A0B0DW65	Neurospora crassa	F7VR57	Sordaria macrospora k-hell
A0A0B0DW65	Neurospora crassa	F8N063	Neurospora tetrasperma FGSC 2508
A0A0B0DW65	Neurospora crassa	G4U9N6	Neurospora tetrasperma FGSC 2509
A0A0B0IB41	Paenibacillus sp. P1XP2	A0A0B0IB41	Paenibacillus sp. P1XP2
A0A0B2WFG4	Metarhizium album ARSEF 1941	A0A0A1V3Q1	Metarhizium robertsii
A0A0B2WFG4	Metarhizium album ARSEF 1941	A0A0B2WFG4	Metarhizium album ARSEF 1941
A0A0B2WFG4	Metarhizium album ARSEF 1941	A0A0B4FJT8	Metarhizium anisopliae ARSEF 549
A0A0B2WFG4	Metarhizium album ARSEF 1941	A0A0B4G8I0	Metarhizium guizhouense ARSEF 977
A0A0B2WFG4	Metarhizium album ARSEF 1941	A0A0B4GM90	Metarhizium brunneum ARSEF 3297
A0A0B2WFG4	Metarhizium album ARSEF 1941	A0A0B4IGY6	Metarhizium majus ARSEF 297
A0A0B2WFG4	Metarhizium album ARSEF 1941	A0A0D9P1P2	Metarhizium anisopliae BRIP 53293
A0A0B2WFG4	Metarhizium album ARSEF 1941	A0A167HI20	Metarhizium rileyi RCEF 4871
A0A0B2WFG4	Metarhizium album ARSEF 1941	E9E6I3	Metarhizium acridum CQMa 102
A0A0B7F5V7	Rhizoctonia solani AG-1 IB	A0A0B7F5V7	Rhizoctonia solani AG-1 IB
A0A0B7F5V7	Rhizoctonia solani AG-1 IB	M5C2A8	Rhizoctonia solani AG-1 IB
A0A0B7FD88	Rhizoctonia solani AG-1 IB	A0A066VZN4	Rhizoctonia solani AG-8 WAC10335
A0A0B7FD88	Rhizoctonia solani AG-1 IB	A0A074RXL2	Rhizoctonia solani 123E
A0A0B7FD88	Rhizoctonia solani AG-1 IB	A0A0B7FD88	Rhizoctonia solani AG-1 IB
A0A0B7FD88	Rhizoctonia solani AG-1 IB	A0A0B7FM92	Rhizoctonia solani AG-1 IB
A0A0B7FD88	Rhizoctonia solani AG-1 IB	A0A0K6G867	Rhizoctonia solani
A0A0B7FD88	Rhizoctonia solani AG-1 IB	M5C291	Rhizoctonia solani AG-1 IB
A0A0B7FD88	Rhizoctonia solani AG-1 IB	M5C334	Rhizoctonia solani AG-1 IB
A0A0B7FD88	Rhizoctonia solani AG-1 IB	X8J087	Rhizoctonia solani AG-3 Rhs1AP
A0A0B7G3Z6	Rhizoctonia solani AG-1 IB	A0A0B7FV09	Rhizoctonia solani AG-1 IB
A0A0B7G3Z6	Rhizoctonia solani AG-1 IB	A0A0B7G3Z6	Rhizoctonia solani AG-1 IB
A0A0B7G3Z6	Rhizoctonia solani AG-1 IB	M5C3S9	Rhizoctonia solani AG-1 IB
A0A0B7G4N0	Rhizoctonia solani AG-1 IB	A0A066VAK4	Rhizoctonia solani AG-8 WAC10335
A0A0B7G4N0	Rhizoctonia solani AG-1 IB	A0A074RQ12	Rhizoctonia solani 123E
A0A0B7G4N0	Rhizoctonia solani AG-1 IB	A0A0B7FD49	Rhizoctonia solani AG-1 IB
A0A0B7G4N0	Rhizoctonia solani AG-1 IB	A0A0B7G4N0	Rhizoctonia solani AG-1 IB
A0A0B7G4N0	Rhizoctonia solani AG-1 IB	A0A0K6G8K7	Rhizoctonia solani
A0A0B7G4N0	Rhizoctonia solani AG-1 IB	M5BV09	Rhizoctonia solani AG-1 IB
A0A0B7G4N0	Rhizoctonia solani AG-1 IB	X8IYZ9	Rhizoctonia solani AG-3 Rhs1AP
A0A0B7K5Y5	Clonostachys rosea	A0A0B7K5Y5	Clonostachys rosea
A0A0B7KJK7	Clonostachys rosea	A0A0B7KJK7	Clonostachys rosea
A0A0C2IFW4	Sporothrix brasiliensis 5110	A0A0C2IFW4	Sporothrix brasiliensis 5110
A0A0C2IFW4	Sporothrix brasiliensis 5110	U7Q3N3	Sporothrix schenckii ATCC 58251
A0A0C2SR22	Amanita muscaria Koide BX008	A0A0C2SR22	Amanita muscaria Koide BX008
A0A0C3BRJ9	Hebeloma cylindrosporum h7	A0A0C3BRJ9	Hebeloma cylindrosporum h7
A0A0C3CIS1	Hebeloma cylindrosporum h7	A0A0C3CIS1	Hebeloma cylindrosporum h7
A0A0C3ED07	Scleroderma citrinum Foug A	A0A0C3ED07	Scleroderma citrinum Foug A
A0A0C3G5L6	Piloderma croceum F 1598	A0A0C3G5L6	Piloderma croceum F 1598
A0A0C3GLW1	Piloderma croceum F 1598	A0A0C3GLW1	Piloderma croceum F 1598
A0A0C3HYE7	Oidiodendron maius Zn	A0A0C3HYE7	Oidiodendron maius Zn
A0A0C3NZZ2	Phlebiopsis gigantea 11061_1 CR5-6	A0A0C3NZZ2	Phlebiopsis gigantea 11061_1 CR5-6
A0A0C3P007	Phlebiopsis gigantea 11061_1 CR5-6	A0A0C3P007	Phlebiopsis gigantea 11061_1 CR5-6
A0A0C3PJ98	Pisolithus tinctorius Marx 270	A0A0C3PJ98	Pisolithus tinctorius Marx 270
A0A0C3PJ98	Pisolithus tinctorius Marx 270	A0A0C9ZUS7	Pisolithus microcarpus 441
A0A0C3PM17	Phlebiopsis gigantea 11061_1 CR5-6	A0A0C3PM17	Phlebiopsis gigantea 11061_1 CR5-6
A0A0C3PM31	Phlebiopsis gigantea 11061_1 CR5-6	A0A0C3PM31	Phlebiopsis gigantea 11061_1 CR5-6
A0A0C3PRD4	Phlebiopsis gigantea 11061_1 CR5-6	A0A0C3PRD4	Phlebiopsis gigantea 11061_1 CR5-6
A0A0C3SA03	Phlebiopsis gigantea 11061_1 CR5-6	A0A0C3SA03	Phlebiopsis gigantea 11061_1 CR5-6
A0A0C3SB52	Phlebiopsis gigantea 11061_1 CR5-6	A0A0C3SB52	Phlebiopsis gigantea 11061_1 CR5-6
A0A0C4DX30	Magnaporthiopsis poae ATCC 64411	A0A0C4DX30	Magnaporthiopsis poae ATCC 64411
A0A0C4DX30	Magnaporthiopsis poae ATCC 64411	J3NW86	Gaeumannomyces tritici R3-111a-1
A0A0C6DRV2	Grifola frondosa	A0A0C6DRV2	Grifola frondosa
A0A0C6E0T5	Grifola frondosa	A0A0C6E0T5	Grifola frondosa
A0A0C6E5V8	Grifola frondosa	A0A0C6E5V8	Grifola frondosa
A0A0C6E5V8	Grifola frondosa	A0A1C7M637	Grifola frondosa
A0A0C6FXV2	Methylobacterium aquaticum	A0A0C6FXV2	Methylobacterium aquaticum
A0A0C6FXV2	Methylobacterium aquaticum	A0A0J6S8A0	Methylobacterium variabile
A0A0C6FXV2	Methylobacterium aquaticum	A0A0J6TX74	Methylobacterium indicum
A0A0C6FXV2	Methylobacterium aquaticum	A0A179S7A9	Methylobacterium platani
A0A0C6FXV2	Methylobacterium aquaticum	A0A1H8Y0J7	Methylobacterium sp. ap11
A0A0C6FXV2	Methylobacterium aquaticum	A0A1I2IMY0	Methylobacterium sp. yr596
A0A0C6FXV2	Methylobacterium aquaticum	A0A1I7IDD1	Methylobacterium sp. 174MFSha1.1
A0A0C6FXV2	Methylobacterium aquaticum	A0A2R4WEL0	Methylobacterium sp. PR1016A
A0A0C6FXV2	Methylobacterium aquaticum	A0A2U8WLC7	Methylobacterium sp. 17Sr1-28
A0A0C6FXV2	Methylobacterium aquaticum	A0A2U8X0G7	Methylobacterium sp. 17Sr1-1
A0A0C9VVH1	Sphaerobolus stellatus SS14	A0A0C9VVH1	Sphaerobolus stellatus SS14
A0A0C9W5A3	Hydnomerulius pinastri MD-312	A0A0C9W5A3	Hydnomerulius pinastri MD-312
A0A0C9WDZ9	Hydnomerulius pinastri MD-312	A0A0C9WDZ9	Hydnomerulius pinastri MD-312
A0A0C9X9E6	Laccaria amethystina LaAM-08-1	A0A0C9X9E6	Laccaria amethystina LaAM-08-1
A0A0C9X9E6	Laccaria amethystina LaAM-08-1	A0A0C9XTV5	Laccaria amethystina LaAM-08-1
A0A0C9X9E6	Laccaria amethystina LaAM-08-1	B0DZS6	Laccaria bicolor S238N-H82
A0A0C9ZJ37	Pisolithus microcarpus 441	A0A0C9ZJ37	Pisolithus microcarpus 441
A0A0D0A111	Suillus luteus UH-Slu-Lm8-n1	A0A0D0A111	Suillus luteus UH-Slu-Lm8-n1
A0A0D0AW61	Gymnopus luxurians FD-317 M1	A0A0D0AW61	Gymnopus luxurians FD-317 M1
A0A0D0BX04	Gymnopus luxurians FD-317 M1	A0A0D0BX04	Gymnopus luxurians FD-317 M1
A0A0D0BX04	Gymnopus luxurians FD-317 M1	A0A0D0C9Y3	Gymnopus luxurians FD-317 M1
A0A0D0DNJ1	Paxillus rubicundulus Ve08.2h10	A0A0C9TJC7	Paxillus involutus ATCC 200175
A0A0D0DNJ1	Paxillus rubicundulus Ve08.2h10	A0A0D0DNJ1	Paxillus rubicundulus Ve08.2h10
A0A0D0E7X1	Paxillus rubicundulus Ve08.2h10	A0A0C9SVE0	Paxillus involutus ATCC 200175
A0A0D0E7X1	Paxillus rubicundulus Ve08.2h10	A0A0C9SXC0	Paxillus involutus ATCC 200175
A0A0D0E7X1	Paxillus rubicundulus Ve08.2h10	A0A0D0E7X1	Paxillus rubicundulus Ve08.2h10
A0A0D1L5Z7	Bacillus subtilis	A0A0D1L5Z7	Bacillus subtilis
A0A0D1L5Z7	Bacillus subtilis	A0A0K6KQ94	Bacillus cereus
A0A0D1L5Z7	Bacillus subtilis	A0A136GEB2	Bacillus subtilis
A0A0D1L5Z7	Bacillus subtilis	A0A164XWQ3	Bacillus subtilis
A0A0D1L5Z7	Bacillus subtilis	A0A165B8P7	Bacillus subtilis
A0A0D1L5Z7	Bacillus subtilis	A0A1J5WT09	Bacillus sp. FMQ74
A0A0D1L5Z7	Bacillus subtilis	A0A1Q9FUC3	Bacillus licheniformis
A0A0D1L5Z7	Bacillus subtilis	A0A1V4FZV0	Bacillus intestinalis
A0A0D1L5Z7	Bacillus subtilis	A0A1X7FEN2	Bacillus sp. CC120222-01
A0A0D1L5Z7	Bacillus subtilis	A0A1Y0WU99	Bacillus licheniformis
A0A0D1L5Z7	Bacillus subtilis	A0A2I7T7F5	Bacillus subtilis
A0A0D1L5Z7	Bacillus subtilis	A0A2L0QAE8	Bacillus cereus
A0A0D1L5Z7	Bacillus subtilis	A0A2L0RAK8	Bacillus sp. MBGLi79
A0A0D1L5Z7	Bacillus subtilis	A0A2M8T622	Bacillus sp. SN1
A0A0D1L5Z7	Bacillus subtilis	A0A2N1KFS1	Bacillus sp. SN32
A0A0D1L5Z7	Bacillus subtilis	A0A2X0X3M7	Bacillus tequilensis
A0A0D1L5Z7	Bacillus subtilis	A0A2X1WWC5	Paenibacillus polymyxa
A0A0D1L5Z7	Bacillus subtilis	A0A2Z5NZ16
A0A0D1L5Z7	Bacillus subtilis	A0A347B7Y4
A0A0D1L5Z7	Bacillus subtilis	A0A371RQJ0
A0A0D1L5Z7	Bacillus subtilis	G4NX12	Bacillus subtilis subsp. spizizenii TU-B-10
A0A0D1L5Z7	Bacillus subtilis	I0F520	Bacillus sp. JS
A0A0D1L5Z7	Bacillus subtilis	L8PPV8	Bacillus subtilis subsp. inaquosorum KCTC 13429
A0A0D1L5Z7	Bacillus subtilis	M4KSG3	Bacillus subtilis XF-1
A0A0D1L5Z7	Bacillus subtilis	U2ABS3	Bacillus sp. EGD-AK10
A0A0D1YPF4	Exophiala sideris	A0A0D1YPF4	Exophiala sideris
A0A0D1ZGM9	Exophiala mesophila	A0A072P1Q1	Exophiala aquamarina CBS 119918
A0A0D1ZGM9	Exophiala mesophila	A0A0D1ZGM9	Exophiala mesophila
A0A0D1ZMB0	Exophiala sideris	A0A0D1ZMB0	Exophiala sideris
A0A0D1ZRX9	Exophiala mesophila	A0A0D1ZRX9	Exophiala mesophila
A0A0D2BIJ8	Exophiala oligosperma	A0A0D1Z1T4	Exophiala spinifera
A0A0D2BIJ8	Exophiala oligosperma	A0A0D2BIJ8	Exophiala oligosperma
A0A0D2BIJ8	Exophiala oligosperma	A0A0D2EVP0	Exophiala xenobiotica
A0A0D2CHV6	Phialophora americana	A0A0D2CHV6	Phialophora americana
A0A0D2CHV6	Phialophora americana	A0A0D2CPI8	Cladophialophora immunda
A0A0D2CHV6	Phialophora americana	A0A0D2ECF4	Cladophialophora bantiana CBS 173.52
A0A0D2CHV6	Phialophora americana	A0A0D2I5C2	Fonsecaea multimorphosa CBS 102226
A0A0D2CHV6	Phialophora americana	A0A1C1CAG5	Cladophialophora carrionii
A0A0D2CHV6	Phialophora americana	V9D6W8	Cladophialophora carrionii CBS 160.54
A0A0D2CHV6	Phialophora americana	W9VT28	Cladophialophora yegresii CBS 114405
A0A0D2CHV6	Phialophora americana	W9WMP5	Cladophialophora psammophila CBS 110553
A0A0D2G2N4	Rhinocladiella mackenziei CBS 650.93	A0A0D2G2N4	Rhinocladiella mackenziei CBS 650.93
A0A0D2GZZ3	Fonsecaea pedrosoi CBS 271.37	A0A0D2GZZ3	Fonsecaea pedrosoi CBS 271.37
A0A0D2GZZ3	Fonsecaea pedrosoi CBS 271.37	A0A177FJJ4	Fonsecaea monophora
A0A0D2GZZ3	Fonsecaea pedrosoi CBS 271.37	A0A178D8T2	Fonsecaea nubica
A0A0D2LCL5	Hypholoma sublateritium FD-334 SS-4	A0A0D2LCL5	Hypholoma sublateritium FD-334 SS-4
A0A0D2N606	Hypholoma sublateritium FD-334 SS-4	A0A0D2N606	Hypholoma sublateritium FD-334 SS-4
A0A0D2NH46	Hypholoma sublateritium FD-334 SS-4	A0A0D2NH46	Hypholoma sublateritium FD-334 SS-4
A0A0D2NRL2	Hypholoma sublateritium FD-334 SS-4	A0A0D2NRL2	Hypholoma sublateritium FD-334 SS-4
A0A0D6MK70	Tanticharoenia sakaeratensis NBRC 103193	A0A0D6MK70	Tanticharoenia sakaeratensis NBRC 103193
A0A0D6MMU2	Tanticharoenia sakaeratensis NBRC 103193	A0A0D6MMU2	Tanticharoenia sakaeratensis NBRC 103193
A0A0D6P827	Acidisphaera rubrifaciens HS-AP3	A0A0D6P827	Acidisphaera rubrifaciens HS-AP3
A0A0D6PMD3	Acidocella aminolytica 101 = DSM 11237	A0A0D6PMD3	Acidocella aminolytica 101 = DSM 11237
A0A0D7BFX8	Cylindrobasidium torrendii FP15055 ss-10	A0A0D7BFX8	Cylindrobasidium torrendii FP15055 ss-10
A0A0D7WU32	Paenibacillus terrae	A0A0D7WU32	Paenibacillus terrae
A0A0D7WU32	Paenibacillus terrae	A0A0F6EZJ8	Paenibacillus polymyxa
A0A0D7WU32	Paenibacillus terrae	A0A163TVD7	Paenibacillus jamilae
A0A0D7WU32	Paenibacillus terrae	A0A1A0FXR2	Paenibacillus polymyxa
A0A0D7WU32	Paenibacillus terrae	A0A222WMB2	Paenibacillus kribbensis
A0A0D7WU32	Paenibacillus terrae	A0A378XXD5
A0A0F4YEK5	Rasamsonia emersonii CBS 393.64	A0A0F4YEK5	Rasamsonia emersonii CBS 393.64
A0A0F4Z0C0	Rasamsonia emersonii CBS 393.64	A0A0F4Z0C0	Rasamsonia emersonii CBS 393.64
A0A0F5XWL1	Pantoea sp. 3.5.1	A0A0F5XWL1	Pantoea sp. 3.5.1
A0A0F5XWL1	Pantoea sp. 3.5.1	A0A1I5HRD3	Pantoea sp. OV426
A0A0F7ZGF2	Hirsutella minnesotensis 3608	A0A0F7ZGF2	Hirsutella minnesotensis 3608
A0A0F7ZPU4	Hirsutella minnesotensis 3608	A0A0F7ZPU4	Hirsutella minnesotensis 3608
A0A0G2DVC6	Phaeomoniella chlamydospora	A0A0G2DVC6	Phaeomoniella chlamydospora
A0A0G2EZ04	Phaeomoniella chlamydospora	A0A0G2EZ04	Phaeomoniella chlamydospora
A0A0G2FDL3	Diaporthe ampelina	A0A0G2FDL3	Diaporthe ampelina
A0A0G2FDL3	Diaporthe ampelina	A0A2P5HP66	Diaporthe helianthi
A0A0G2HN20	Diaporthe ampelina	A0A0G2HN20	Diaporthe ampelina
A0A0G4LSS5	Verticillium longisporum	A0A0G4LIE3	Verticillium longisporum
A0A0G4LSS5	Verticillium longisporum	A0A0G4LSS5	Verticillium longisporum
A0A0G4LSS5	Verticillium longisporum	A0A0G4LWM6	Verticillium longisporum
A0A0G4LSS5	Verticillium longisporum	A0A0G4MLT7	Verticillium longisporum
A0A0G4LSS5	Verticillium longisporum	A0A2J8CT53	Verticillium dahliae
A0A0G4LSS5	Verticillium longisporum	C9S633	Verticillium alfalfae VaMs.102
A0A0G4MMS0	Verticillium longisporum	A0A0G4M4E8	Verticillium longisporum
A0A0G4MMS0	Verticillium longisporum	A0A0G4MG98	Verticillium longisporum
A0A0G4MMS0	Verticillium longisporum	A0A0G4MMS0	Verticillium longisporum
A0A0G4MMS0	Verticillium longisporum	A0A2J8DTG0	Verticillium dahliae
A0A0G4N257	Verticillium longisporum	A0A0G4N257	Verticillium longisporum
A0A0G4PE86	Penicillium camemberti FM 013	A0A0A2KHT6	Penicillium italicum
A0A0G4PE86	Penicillium camemberti FM 013	A0A0G4PE86	Penicillium camemberti FM 013
A0A0G4PE86	Penicillium camemberti FM 013	A0A0M9WH73	Penicillium nordicum
A0A0G4PE86	Penicillium camemberti FM 013	A0A101M8Z0	Penicillium freii
A0A0G4PE86	Penicillium camemberti FM 013	A0A167QB42	Penicillium chrysogenum
A0A0G4PE86	Penicillium camemberti FM 013	A0A1V6NW21	Penicillium polonicum
A0A0G4PE86	Penicillium camemberti FM 013	A0A1V6QQM1	Penicillium solitum
A0A0G4PE86	Penicillium camemberti FM 013	A0A1V6SJI5	Penicillium flavigenum
A0A0G4PE86	Penicillium camemberti FM 013	B6GZC5	Penicillium rubens Wisconsin 54-1255
A0A0H2RN63	Schizopora paradoxa	A0A0H2RN63	Schizopora paradoxa
A0A0H2S0E4	Schizopora paradoxa	A0A0H2S0E4	Schizopora paradoxa
A0A0H2S6P5	Schizopora paradoxa	A0A0H2S6P5	Schizopora paradoxa
A0A0H3E342	Bacillus atrophaeus 1942	A0A0H3E342	Bacillus atrophaeus 1942
A0A0J0XZ85	Cutaneotrichosporon oleaginosum	A0A0J0XZ85	Cutaneotrichosporon oleaginosum
A0A0J5JWP1	Bacillus sp. LL01	A0A0J5JWP1	Bacillus sp. LL01
A0A0J5JWP1	Bacillus sp. LL01	A0A0N0VNP6	Bacillus sp. CHD6a
A0A0J5JWP1	Bacillus sp. LL01	A0A1Y0CQY2	Bacillus horikoshii
A0A0J5Q2F7	Aspergillus fumigatus Z5	A0A0J5Q2F7	Aspergillus fumigatus Z5
A0A0J6T1K4	Methylobacterium variabile	A0A0J6T1K4	Methylobacterium variabile
A0A0K9YMM6	Brevibacillus reuszeri	A0A0K9MIE8	Bacillus sp. FJAT-27238
A0A0K9YMM6	Brevibacillus reuszeri	A0A0K9YMM6	Brevibacillus reuszeri
A0A0K9YMM6	Brevibacillus reuszeri	A0A1Y4WZK8	Brevibacillus brevis
A0A0K9YMM6	Brevibacillus reuszeri	A0A220MLK0	Brevibacillus formosus
A0A0K9YMM6	Brevibacillus reuszeri	A0A291BRK2	Brevibacillus brevis X23
A0A0K9YMM6	Brevibacillus reuszeri	A0A2P7SSF9	Brevibacillus brevis
A0A0K9YMM6	Brevibacillus reuszeri	A0A2P7VGZ8	Brevibacillus sp. NRRL NRS-1210
A0A0K9YMM6	Brevibacillus reuszeri	A0A2P7WFK2	Brevibacillus sp. NRRL NRS-603
A0A0K9YMM6	Brevibacillus reuszeri	A0A2Z4MP52
A0A0K9YMM6	Brevibacillus reuszeri	C0Z5C9	Brevibacillus brevis NBRC 100599
A0A0K9YMM6	Brevibacillus reuszeri	J2GP73	Brevibacillus sp. BC25
A0A0L0HDN8	Spizellomyces punctatus DAOM BR117	A0A0L0HDN8	Spizellomyces punctatus DAOM BR117
A0A0L0NAI6	Tolypocladium ophioglossoides CBS 100239	A0A0L0NAI6	Tolypocladium ophioglossoides CBS 100239
A0A0L0NAI6	Tolypocladium ophioglossoides CBS 100239	A0A0W7VM73	Trichoderma gamsii
A0A0L0NAI6	Tolypocladium ophioglossoides CBS 100239	A0A179GER1	Purpureocillium lilacinum
A0A0L0NAI6	Tolypocladium ophioglossoides CBS 100239	A0A1T3C9W3	Trichoderma guizhouense
A0A0L0NAI6	Tolypocladium ophioglossoides CBS 100239	A0A2H3AAZ3	Trichoderma parareesei
A0A0L0NAI6	Tolypocladium ophioglossoides CBS 100239	A0A2K0UC54	Trichoderma harzianum
A0A0L0NAI6	Tolypocladium ophioglossoides CBS 100239	A0A2K3QQ59	Tolypocladium capitatum
A0A0L0NAI6	Tolypocladium ophioglossoides CBS 100239	A0A2N1L0D0	Trichoderma harzianum
A0A0L0NAI6	Tolypocladium ophioglossoides CBS 100239	A0A2S4KSK3	Tolypocladium paradoxum
A0A0L0NAI6	Tolypocladium ophioglossoides CBS 100239	A0A2T3YZ88	Trichoderma asperellum CBS 433.97
A0A0L0NAI6	Tolypocladium ophioglossoides CBS 100239	A0A2T4B9N7	Trichoderma citrinoviride
A0A0L0NAI6	Tolypocladium ophioglossoides CBS 100239	A0A2T4BQB8	Trichoderma longibrachiatum ATCC 18648
A0A0L0NAI6	Tolypocladium ophioglossoides CBS 100239	G0RKQ0	Trichoderma reesei QM6a
A0A0L0NAI6	Tolypocladium ophioglossoides CBS 100239	G9N1W4	Trichoderma virens Gv29-8
A0A0L0NAI6	Tolypocladium ophioglossoides CBS 100239	G9PA69	Trichoderma atroviride IMI 206040
A0A0L1IQ66	Aspergillus nomius NRRL 13137	A0A0F0I6H5	Aspergillus parasiticus SU-1
A0A0L1IQ66	Aspergillus nomius NRRL 13137	A0A0L1IQ66	Aspergillus nomius NRRL 13137
A0A0L1IQ66	Aspergillus nomius NRRL 13137	A0A1F7ZL90	Aspergillus bombycis
A0A0L1IQ66	Aspergillus nomius NRRL 13137	A0A1S9DWY4	Aspergillus oryzae
A0A0L1IQ66	Aspergillus nomius NRRL 13137	A0A2G7FIK6	Aspergillus arachidicola
A0A0L1IQ66	Aspergillus nomius NRRL 13137	A0A2P2HCX1	Aspergillus flavus AF70
A0A0L1IQ66	Aspergillus nomius NRRL 13137	B8MVX4	Aspergillus flavus NRRL3357
A0A0L1IQ66	Aspergillus nomius NRRL 13137	I8TZ86	Aspergillus oryzae 3.042
A0A0L1IQ66	Aspergillus nomius NRRL 13137	Q2UTC1	Aspergillus oryzae RIB40
A0A0L6J5W3	Methylobacterium sp. ARG-1	A0A089NQH6	Methylobacterium oryzae CBMB20
A0A0L6J5W3	Methylobacterium sp. ARG-1	A0A0L6J5W3	Methylobacterium sp. ARG-1
A0A0L6J5W3	Methylobacterium sp. ARG-1	A0A0N0TXM4	Streptomyces purpurogeneiscleroticus
A0A0L6J5W3	Methylobacterium sp. ARG-1	A0A0V7YXD7	Methylobacterium sp. GXS13
A0A0L6J5W3	Methylobacterium sp. ARG-1	A0A1G5UG69	Methylobacterium sp. UNC378MF
A0A0L6J5W3	Methylobacterium sp. ARG-1	A0A1H0D5H2	Methylobacterium phyllostachyos
A0A0L6J5W3	Methylobacterium sp. ARG-1	A0A1I3SCC4	Methylobacterium brachiatum
A0A0L6J5W3	Methylobacterium sp. ARG-1	A0A1I4RGG7	Methylobacterium pseudosasicola
A0A0L6J5W3	Methylobacterium sp. ARG-1	A0A1I6RXD3	Methylobacterium sp. yr668
A0A0L6J5W3	Methylobacterium sp. ARG-1	A0A1I7LM98	Methylobacterium sp. UNCCL125
A0A0L6J5W3	Methylobacterium sp. ARG-1	A0A2E7YCG0	Methylobacterium sp.
A0A0L6J5W3	Methylobacterium sp. ARG-1	A0A2M8VD00	Methylobacterium radiotolerans
A0A0L6J5W3	Methylobacterium sp. ARG-1	A0A2U1DLD1	Methylobacterium organophilum
A0A0L6J5W3	Methylobacterium sp. ARG-1	A0A2U9U3X6	Methylobacterium sp. XJLM
A0A0L6J5W3	Methylobacterium sp. ARG-1	I9LLR4	Methylobacterium sp. GXF4
A0A0L6J5W3	Methylobacterium sp. ARG-1	M7YUF7	Methylobacterium mesophilicum SR1.6/6
A0A0L6WS28	Termitomyces sp. J132	A0A0L6WS28	Termitomyces sp. J132
A0A0L6WX77	Termitomyces sp. J132	A0A0L6WX77	Termitomyces sp. J132
A0A0M0LJ18	Bacillus koreensis	A0A0M0LJ18	Bacillus koreensis
A0A0M8N1T6	Escovopsis weberi	A0A0M8N1T6	Escovopsis weberi
A0A0N0LJ69	Chryseobacterium sp. ERMR1:04	A0A086A918	Chryseobacterium soli
A0A0N0LJ69	Chryseobacterium sp. ERMR1:04	A0A086AW71	Chryseobacterium sp. JM1
A0A0N0LJ69	Chryseobacterium sp. ERMR1:04	A0A0J7IU51	Chryseobacterium sp. FH2
A0A0N0LJ69	Chryseobacterium sp. ERMR1:04	A0A0N0LJ69	Chryseobacterium sp. ERMR1:04
A0A0N0LJ69	Chryseobacterium sp. ERMR1:04	A0A1I4XMD0	Chryseobacterium oleae
A0A0N0LJ69	Chryseobacterium sp. ERMR1:04	A0A1M5B233	Chryseobacterium sp. YR203
A0A0N0LJ69	Chryseobacterium sp. ERMR1:04	A0A1M5C4A5	Chryseobacterium sp. OV279
A0A0N0LJ69	Chryseobacterium sp. ERMR1:04	A0A1M7HUL4	Chryseobacterium polytrichastri
A0A0N0LJ69	Chryseobacterium sp. ERMR1:04	A0A1N7I682	Chryseobacterium shigense
A0A0N0LJ69	Chryseobacterium sp. ERMR1:04	A0A220SGZ6	Chryseobacterium sp. T16E-39
A0A0N0LJ69	Chryseobacterium sp. ERMR1:04	A0A316WEQ0
A0A0N1H0Z0	Phialophora attae	A0A072PG45	Exophiala aquamarina CBS 119918
A0A0N1H0Z0	Phialophora attae	A0A0N1H0Z0	Phialophora attae
A0A0N1H0Z0	Phialophora attae	W2RM20	Cyphellophora europaea CBS 101466
A0A0N1HS22	Phialophora attae	A0A0N1HS22	Phialophora attae
A0A0N1NYM3	Phialophora attae	A0A0N1NYM3	Phialophora attae
A0A0N8H5H5	Neonectria ditissima	A0A0N8H5H5	Neonectria ditissima
A0A0N9Y5Z9	Candidatus Nitrocosmicus oleophilus	A0A0N9Y5Z9	Candidatus Nitrocosmicus oleophilus
A0A0P1BK04	Ceraceosorus bombacis	A0A0P1BK04	Ceraceosorus bombacis
A0A0P1BK04	Ceraceosorus bombacis	A0A316W2F1
A0A0P7BVI6	Neonectria ditissima	A0A0P7BVI6	Neonectria ditissima
A0A0Q3WMJ7	Brevibacillus choshinensis	A0A0Q3WMJ7	Brevibacillus choshinensis
A0A0Q3WMJ7	Brevibacillus choshinensis	A0A1I3X6Q3	Brevibacillus sp. OK042
A0A0Q4NS57	Duganella sp. Leaf61	A0A0Q4NS57	Duganella sp. Leaf61
A0A0Q4NS57	Duganella sp. Leaf61	A0A0Q5CKU0	Duganella sp. Leaf126
A0A0Q4QK60	Paenibacillus sp. Leaf72	A0A0Q4QK60	Paenibacillus sp. Leaf72
A0A0Q4QK60	Paenibacillus sp. Leaf72	A0A1B2DBQ0	Paenibacillus sp. BIHB4019
A0A0Q4QK60	Paenibacillus sp. Leaf72	A0A1I2B994	Paenibacillus algorifonticola
A0A0Q4X160	Methylobacterium sp. Leaf99	A0A0Q4X160	Methylobacterium sp. Leaf99
A0A0Q5FJZ3	Microbacterium sp. Leaf320	A0A0Q5FJZ3	Microbacterium sp. Leaf320
A0A0Q5FJZ3	Microbacterium sp. Leaf320	A0A0Q9DKM4	Microbacterium sp. Root280D1
A0A0Q5FJZ3	Microbacterium sp. Leaf320	A0A134DET1	Microbacterium hominis
A0A0Q5FJZ3	Microbacterium sp. Leaf320	A0A147E556	Microbacterium oxydans
A0A0Q6MZ99	Mesorhizobium sp. Root102	A0A0Q6MZ99	Mesorhizobium sp. Root102
A0A0Q6MZ99	Mesorhizobium sp. Root102	A0A2A6FC78	Mesorhizobium sanjuanii
A0A0Q6MZ99	Mesorhizobium sp. Root102	A0A2T4IZZ3	Mesorhizobium helmanticense
A0A0Q6UZ75	Rhizobium sp. Root1220	A0A0Q6UZ75	Rhizobium sp. Root1220
A0A0Q6VWD1	Rhizobium sp. Root1220	A0A0Q6VWD1	Rhizobium sp. Root1220
A0A0Q7SQQ2	Paenibacillus sp. Root52	A0A0N0C2M0	Paenibacillus sp. A59
A0A0Q7SQQ2	Paenibacillus sp. Root52	A0A0Q7SQQ2	Paenibacillus sp. Root52
A0A0Q7SQQ2	Paenibacillus sp. Root52	A0A1B8WPB3	Bacillus sp. FJAT-27264
A0A0Q7SQQ2	Paenibacillus sp. Root52	A0A1G5F657	Paenibacillus polysaccharolyticus
A0A0Q7SQQ2	Paenibacillus sp. Root52	A0A264DEW0	Paenibacillus taichungensis
A0A0Q7SQQ2	Paenibacillus sp. Root52	A0A2G7LYV0	Paenibacillus sp. LK1
A0A0Q7SQQ2	Paenibacillus sp. Root52	A0A2V3S881	Paenibacillus taichungensis
A0A0Q7SQQ2	Paenibacillus sp. Root52	A0A2V4W7Y7	Paenibacillus barcinonensis
A0A0Q7SQQ2	Paenibacillus sp. Root52	A0A2W6Q730	Paenibacillus silvae
A0A0Q7SQQ2	Paenibacillus sp. Root52	A0A327PRC8
A0A0Q7SQQ2	Paenibacillus sp. Root52	A0A329QDT0
A0A0Q7SSB6	Paenibacillus sp. Root52	A0A0A2U7Y7	Paenibacillus sp. MAEPY2
A0A0Q7SSB6	Paenibacillus sp. Root52	A0A0Q7SSB6	Paenibacillus sp. Root52
A0A0Q7SSB6	Paenibacillus sp. Root52	A0A100VJ41	Paenibacillus amylolyticus
A0A0Q7SSB6	Paenibacillus sp. Root52	A0A1G5ID96	Paenibacillus polysaccharolyticus
A0A0Q7SSB6	Paenibacillus sp. Root52	A0A1G6Q0X8	Paenibacillus sp. CF095
A0A0Q7SSB6	Paenibacillus sp. Root52	A0A1H3YTH9	Paenibacillus sp. 276b
A0A0Q7SSB6	Paenibacillus sp. Root52	A0A1H7RE58	Paenibacillus sp. OK003
A0A0Q7SSB6	Paenibacillus sp. Root52	A0A1H8E2M5	Paenibacillus sp. OK076
A0A0Q7SSB6	Paenibacillus sp. Root52	A0A1V4GF81	Paenibacillus sp. VT-16-81
A0A0Q7SSB6	Paenibacillus sp. Root52	A0A264ECI4	Paenibacillus taichungensis
A0A0Q7SSB6	Paenibacillus sp. Root52	A0A329QYQ4
A0A0Q7TZ44	Pseudolabrys sp. Root1462	A0A0Q7TZ44	Pseudolabrys sp. Root1462
A0A0Q8MQB7	Rhizobium sp. Root708	A0A0Q8MQB7	Rhizobium sp. Root708
A0A0Q8ZKP3	Mycobacterium sp. Root265	A0A0Q8ZKP3	Mycobacterium sp. Root265
A0A0R1T1Q4	Lactobacillus paracollinoides DSM 15502 = JCM 1196	A0A0R1T1Q4	Lactobacillus paracollinoides DSM 15502 = JCM 1196
A0A0R1T1Q4	Lactobacillus paracollinoides DSM 15502 = JCM 1196	A0A0R2BI13	Lactobacillus collinoides DSM 20515 = JCM 1123
A0A0R1T1Q4	Lactobacillus paracollinoides DSM 15502 = JCM 1196	A0A1B2J155	Lactobacillus paracollinoides
A0A0R2LQ72	Lactobacillus paucivorans	A0A0R2LQ72	Lactobacillus paucivorans
A0A0S9DNF3	Agreia sp. Leaf244	A0A0S9DNF3	Agreia sp. Leaf244
A0A0S9DNF3	Agreia sp. Leaf244	A0A0S9PER2	Agreia sp. Leaf283
A0A0S9PUC7	Methylobacterium sp. Leaf112	A0A0S9PUC7	Methylobacterium sp. Leaf112
A0A0S9SGY2	Methylobacterium sp. Leaf113	A0A0S9SGY2	Methylobacterium sp. Leaf113
A0A0U1LN62	Talaromyces islandicus	A0A0U1LN62	Talaromyces islandicus
A0A0U1M9U3	Talaromyces islandicus	A0A0U1M9U3	Talaromyces islandicus
A0A0U2UCI5	Paenibacillus naphthalenovorans	A0A0U2UCI5	Paenibacillus naphthalenovorans
A0A0U2UCI5	Paenibacillus naphthalenovorans	A0A0U2UT85	Paenibacillus sp. 32O-W
A0A0U5CFQ6	Aspergillus calidoustus	A0A0U5CFQ6	Aspergillus calidoustus
A0A0U5CFQ6	Aspergillus calidoustus	A0A1U8QP40	Aspergillus nidulans FGSC A4
A0A0U5CNY3	Aspergillus calidoustus	A0A0U5CNY3	Aspergillus calidoustus
A0A0U5FQY7	Aspergillus calidoustus	A0A0U5FQY7	Aspergillus calidoustus
A0A0W0F2R6	Moniliophthora roreri	A0A0W0F2R6	Moniliophthora roreri
A0A0W0F2R6	Moniliophthora roreri	V2X6R9	Moniliophthora roreri MCA 2997
A0A0W0FQS5	Moniliophthora roreri	A0A0W0FQS5	Moniliophthora roreri
A0A0W0FQS5	Moniliophthora roreri	V2Y750	Moniliophthora roreri MCA 2997
A0A0W0U334	Legionella geestiana	A0A0W0U334	Legionella geestiana
A0A101AWE0	Mycobacterium sp. GA-2829	A0A101AWE0	Mycobacterium sp. GA-2829
A0A109BJN7	Hyphomicrobium sulfonivorans	A0A109BJN7	Hyphomicrobium sulfonivorans
A0A126PF27	Hymenobacter sp. PAMC 26628	A0A126PF27	Hymenobacter sp. PAMC 26628
A0A127VVT2	Sporosarcina psychrophila	A0A0Q7K751	Paenibacillus sp. Root444D2
A0A127VVT2	Sporosarcina psychrophila	A0A0Q9MUN2	Paenibacillus sp. Soil750
A0A127VVT2	Sporosarcina psychrophila	A0A0Q9QXF1	Paenibacillus sp. Soil766
A0A127VVT2	Sporosarcina psychrophila	A0A127VVT2	Sporosarcina psychrophila
A0A127VVT2	Sporosarcina psychrophila	A0A1H0JZ07	Paenibacillus sp. yr247
A0A127VVT2	Sporosarcina psychrophila	A0A2N0F6P0	Viridibacillus sp. OK051
A0A132BBG8	Phialocephala scopiformis	A0A132BBG8	Phialocephala scopiformis
A0A135LSW3	Penicillium griseofulvum	A0A135LSW3	Penicillium griseofulvum
A0A135LSW3	Penicillium griseofulvum	A0A1V6RUH3	Penicillium vulpinum
A0A135U953	Colletotrichum salicis	A0A010S8G0	Colletotrichum fioriniae PJ7
A0A135U953	Colletotrichum salicis	A0A135S8K1	Colletotrichum simmondsii
A0A135U953	Colletotrichum salicis	A0A135TTA5	Colletotrichum nymphaeae SA-01
A0A135U953	Colletotrichum salicis	A0A135U953	Colletotrichum salicis
A0A135U953	Colletotrichum salicis	A0A161V4L5	Colletotrichum tofieldiae
A0A135U953	Colletotrichum salicis	A0A161XWL4	Colletotrichum incanum
A0A135U953	Colletotrichum salicis	A0A1G4B1Z9	Colletotrichum orchidophilum
A0A135U953	Colletotrichum salicis	A0A1S1VQ06	Colletotrichum incanum
A0A135U953	Colletotrichum salicis	H1UZ93	Colletotrichum higginsianum IMI 349063
A0A136IQA9	Microdochium bolleyi	A0A136IQA9	Microdochium bolleyi
A0A136J3D7	Microdochium bolleyi	A0A136J3D7	Microdochium bolleyi
A0A137Q6X4	Leucoagaricus sp. SymC.cos	A0A137Q6X4	Leucoagaricus sp. SymC.cos
A0A137QEG5	Leucoagaricus sp. SymC.cos	A0A137QEG5	Leucoagaricus sp. SymC.cos
A0A137QK16	Leucoagaricus sp. SymC.cos	A0A137Q316	Leucoagaricus sp. SymC.cos
A0A137QK16	Leucoagaricus sp. SymC.cos	A0A137QK16	Leucoagaricus sp. SymC.cos
A0A139H1H8	Pseudocercospora musae	A0A139H1H8	Pseudocercospora musae
A0A139HVA9	Mycosphaerella eumusae	A0A139HVA7	Mycosphaerella eumusae
A0A139HVA9	Mycosphaerella eumusae	A0A139HVA9	Mycosphaerella eumusae
A0A139HVA9	Mycosphaerella eumusae	A0A139IEX1	Pseudocercospora musae
A0A139HVA9	Mycosphaerella eumusae	N1QC87	Pseudocercospora fijiensis CIRAD86
A0A139SV60	Ventosimonas gracilis	A0A139SV60	Ventosimonas gracilis
A0A143H9B7	Rummeliibacillus stabekisii	A0A143H9B7	Rummeliibacillus stabekisii
A0A146ICL3	Mycena chlorophos	A0A146ICL3	Mycena chlorophos
A0A150V7P1	Acidomyces richmondensis BFW	A0A150V7P1	Acidomyces richmondensis BFW
A0A150VG93	Acidomyces richmondensis BFW	A0A150VG93	Acidomyces richmondensis BFW
A0A151GK23	Drechmeria coniospora	A0A151GK23	Drechmeria coniospora
A0A160V6A7	Bradyrhizobium sp. G22	A0A160V6A7	Bradyrhizobium sp. G22
A0A161V7W4	Pseudovibrio axinellae	A0A161V7W4	Pseudovibrio axinellae
A0A161ZJ99	Haladaptatus sp. R4	A0A161ZJ99	Haladaptatus sp. R4
A0A163F715	Ascochyta rabiei	A0A163F715	Ascochyta rabiei
A0A163LVJ9	Ascochyta rabiei	A0A163LVJ9	Ascochyta rabiei
A0A163LVJ9	Ascochyta rabiei	A0A1Y2MCY5	Epicoccum nigrum
A0A163LVJ9	Ascochyta rabiei	W6YKT1	Bipolaris oryzae ATCC 44560
A0A163LVJ9	Ascochyta rabiei	W7E3Z9	Bipolaris victoriae FI3
A0A163MCI4	Ascochyta rabiei	A0A163MCI4	Ascochyta rabiei
A0A163MCI4	Ascochyta rabiei	A0A177YJG4	Rhodococcus kyotonensis
A0A163MCI4	Ascochyta rabiei	A0A2I1R9F9	Gordonia terrae
A0A163MCI4	Ascochyta rabiei	K6WYS3	Gordonia namibiensis NBRC 108229
A0A163MCI4	Ascochyta rabiei	L7K8Z6	Gordonia rubripertincta NBRC 101908
A0A164TQK5	Sistotremastrum niveocremeum HHB9708	A0A164TQK5	Sistotremastrum niveocremeum HHB9708
A0A165CCD7	Laetiporus sulphureus 93-53	A0A165CCD7	Laetiporus sulphureus 93-53
A0A165CCS1	Laetiporus sulphureus 93-53	A0A165CCS1	Laetiporus sulphureus 93-53
A0A165CI12	Exidia glandulosa HHB12029	A0A165CI12	Exidia glandulosa HHB12029
A0A165EG99	Laetiporus sulphureus 93-53	A0A165EG99	Laetiporus sulphureus 93-53
A0A165GGP5	Calocera cornea HHB12733	A0A165GGP5	Calocera cornea HHB12733
A0A165GGP5	Calocera cornea HHB12733	A0A167N3G3	Calocera viscosa TUFC12733
A0A165ILK6	Laetiporus sulphureus 93-53	A0A165ILK6	Laetiporus sulphureus 93-53
A0A165ILL9	Laetiporus sulphureus 93-53	A0A165ILL9	Laetiporus sulphureus 93-53
A0A165MXQ9	Daedalea quercina L-15889	A0A165MXQ9	Daedalea quercina L-15889
A0A165MXQ9	Daedalea quercina L-15889	S8DU89	Fomitopsis pinicola FP-58527 SS1
A0A165MXQ9	Daedalea quercina L-15889	S8DYG2	Fomitopsis pinicola FP-58527 SS1
A0A165NI23	Daedalea quercina L-15889	A0A165NI23	Daedalea quercina L-15889
A0A165PBD7	Neolentinus lepideus HHB14362 ss-1	A0A165PBD7	Neolentinus lepideus HHB14362 ss-1
A0A165TKV1	Daedalea quercina L-15889	A0A165TKV1	Daedalea quercina L-15889
A0A165TZW9	Neolentinus lepideus HHB14362 ss-1	A0A165TZW9	Neolentinus lepideus HHB14362 ss-1
A0A165UL27	Neolentinus lepideus HHB14362 ss-1	A0A165UL27	Neolentinus lepideus HHB14362 ss-1
A0A165UL27	Neolentinus lepideus HHB14362 ss-1	S7PUK5	Gloeophyllum trabeum ATCC 11539
A0A165VK42	Neolentinus lepideus HHB14362 ss-1	A0A165VK42	Neolentinus lepideus HHB14362 ss-1
A0A165VK42	Neolentinus lepideus HHB14362 ss-1	S7Q3N8	Gloeophyllum trabeum ATCC 11539
A0A166BMJ7	Peniophora sp. CONT	A0A166BMJ7	Peniophora sp. CONT
A0A166IQ68	Fibularhizoctonia sp. CBS 109695	A0A166IQ68	Fibularhizoctonia sp. CBS 109695
A0A166K2V6	Peniophora sp. CONT	A0A166K2V6	Peniophora sp. CONT
A0A166L3M6	Peniophora sp. CONT	A0A166L3M6	Peniophora sp. CONT
A0A166L3P8	Peniophora sp. CONT	A0A166L3P8	Peniophora sp. CONT
A0A166U2H6	Moelleriella libera RCEF 2490	A0A166U2H6	Moelleriella libera RCEF 2490
A0A166U2H6	Moelleriella libera RCEF 2490	A0A179FCS6	Pochonia chlamydosporia 170
A0A166WH05	Fibularhizoctonia sp. CBS 109695	A0A166SCZ8	Fibularhizoctonia sp. CBS 109695
A0A166WH05	Fibularhizoctonia sp. CBS 109695	A0A166WH05	Fibularhizoctonia sp. CBS 109695
A0A166WH05	Fibularhizoctonia sp. CBS 109695	A0A166WI54	Fibularhizoctonia sp. CBS 109695
A0A166Y703	Colletotrichum tofieldiae	A0A010QS37	Colletotrichum fioriniae PJ7
A0A166Y703	Colletotrichum tofieldiae	A0A066X6N2	Colletotrichum sublineola
A0A166Y703	Colletotrichum tofieldiae	A0A135RRR1	Colletotrichum simmondsii
A0A166Y703	Colletotrichum tofieldiae	A0A135SXU5	Colletotrichum nymphaeae SA-01
A0A166Y703	Colletotrichum tofieldiae	A0A135UW86	Colletotrichum salicis
A0A166Y703	Colletotrichum tofieldiae	A0A166Y703	Colletotrichum tofieldiae
A0A166Y703	Colletotrichum tofieldiae	A0A167A681	Colletotrichum incanum
A0A166Y703	Colletotrichum tofieldiae	A0A1B7YHE0	Colletotrichum higginsianum IMI 349063
A0A166Y703	Colletotrichum tofieldiae	A0A1G4B8W6	Colletotrichum orchidophilum
A0A166Y703	Colletotrichum tofieldiae	A0A1Q8S8N7	Colletotrichum chlorophyti
A0A166Y703	Colletotrichum tofieldiae	E3QY53	Colletotrichum graminicola M1.001
A0A166Y703	Colletotrichum tofieldiae	H1VL20	Colletotrichum higginsianum IMI 349063
A0A166Y703	Colletotrichum tofieldiae	L2FKF9	Colletotrichum gloeosporioides Nara gc5
A0A166Y703	Colletotrichum tofieldiae	N4VJ13	Colletotrichum orbiculare MAFF 240422
A0A166Y703	Colletotrichum tofieldiae	T0M0V5	Colletotrichum gloeosporioides Cg-14
A0A166YIB9	Colletotrichum tofieldiae	A0A066XZ40	Colletotrichum sublineola
A0A166YIB9	Colletotrichum tofieldiae	A0A161Y831	Colletotrichum incanum
A0A166YIB9	Colletotrichum tofieldiae	A0A166YIB9	Colletotrichum tofieldiae
A0A166YIB9	Colletotrichum tofieldiae	A0A1Q8RV74	Colletotrichum chlorophyti
A0A166YIB9	Colletotrichum tofieldiae	A0A1S1W6M6	Colletotrichum incanum
A0A166YIB9	Colletotrichum tofieldiae	E3QXU2	Colletotrichum graminicola M1.001
A0A166YIB9	Colletotrichum tofieldiae	H1V6K2	Colletotrichum higginsianum IMI 349063
A0A166YIB9	Colletotrichum tofieldiae	N4VWT7	Colletotrichum orbiculare MAFF 240422
A0A167N4X9	Cordyceps fumosorosea ARSEF 2679	A0A167N4X9	Cordyceps fumosorosea ARSEF 2679
A0A167N5L5	Calocera viscosa TUFC12733	A0A167N5L5	Calocera viscosa TUFC12733
A0A167RJV7	Cordyceps fumosorosea ARSEF 2679	A0A167RJV7	Cordyceps fumosorosea ARSEF 2679
A0A167T9U2	Sporothrix insectorum RCEF 264	A0A167T9U2	Sporothrix insectorum RCEF 264
A0A168CIV5	Moelleriella libera RCEF 2490	A0A168CIV5	Moelleriella libera RCEF 2490
A0A168WCK8	Fictibacillus phosphorivorans	A0A168WCK8	Fictibacillus phosphorivorans
A0A169QJE6	Methylorubrum populi	A0A169QJE6	Methylorubrum populi
A0A169QJE6	Methylorubrum populi	A0A2V3UG19	Methylobacterium sp. B4
A0A169QJE6	Methylorubrum populi	B1ZI99	Methylorubrum populi BJ001
A0A169QJE6	Methylorubrum populi	B7KZ35	Methylorubrum extorquens CM4
A0A169QJE6	Methylorubrum populi	C5B359	Methylorubrum extorquens AM1
A0A176J517	Bacillus sp. SJS	A0A176J517	Bacillus sp. SJS
A0A176YCQ8	Bradyrhizobium sp. BR 10245	A0A176YCQ8	Bradyrhizobium sp. BR 10245
A0A177C2C3	Paraphaeosphaeria sporulosa	A0A177C2C3	Paraphaeosphaeria sporulosa
A0A177CFA7	Paraphaeosphaeria sporulosa	A0A177CFA7	Paraphaeosphaeria sporulosa
A0A177CFA7	Paraphaeosphaeria sporulosa	R9QAK1	Paraphaeosphaeria minitans
A0A177DIG7	Alternaria alternata	A0A177DIG7	Alternaria alternata
A0A177DIG7	Alternaria alternata	A0A364MXN7
A0A177P0D8	Methylosinus sp. R-45379	A0A177P0D8	Methylosinus sp. R-45379
A0A177QPZ7	Planctomycetaceae bacterium SCGC AG-212-F19	A0A177QPZ7	Planctomycetaceae bacterium SCGC AG-212-F19
A0A177VED4	Tilletia controversa	A0A177TAJ9	Tilletia indica
A0A177VED4	Tilletia controversa	A0A177TVS4	Tilletia indica
A0A177VED4	Tilletia controversa	A0A177USB4	Tilletia walkeri
A0A177VED4	Tilletia controversa	A0A177VED4	Tilletia controversa
A0A177VED4	Tilletia controversa	A0A177VFM9	Tilletia caries
A0A178AHV4	Stagonospora sp. SRC1lsM3a	A0A178AHV4	Stagonospora sp. SRC1lsM3a
A0A178AHV4	Stagonospora sp. SRC1lsM3a	Q0V2L7	Parastagonospora nodorum SN15
A0A178AI63	Stagonospora sp. SRC1lsM3a	A0A178AI63	Stagonospora sp. SRC1lsM3a
A0A178DKD5	Pyrenochaeta sp. DS3sAY3a	A0A177D0L2	Alternaria alternata
A0A178DKD5	Pyrenochaeta sp. DS3sAY3a	A0A178ACT1	Stagonospora sp. SRC1lsM3a
A0A178DKD5	Pyrenochaeta sp. DS3sAY3a	A0A178DKD5	Pyrenochaeta sp. DS3sAY3a
A0A178DKD5	Pyrenochaeta sp. DS3sAY3a	Q0UCL2	Parastagonospora nodorum SN15
A0A178ESP5	Trichophyton rubrum	A0A022VYF2	Trichophyton rubrum CBS 288.86
A0A178ESP5	Trichophyton rubrum	A0A022VZ31	Trichophyton rubrum CBS 288.86
A0A178ESP5	Trichophyton rubrum	A0A178ESP5	Trichophyton rubrum
A0A178ESP5	Trichophyton rubrum	A0A178FIJ9	Trichophyton violaceum
A0A178ESP5	Trichophyton rubrum	A0A2P2F0S6	Trichophyton mentagrophytes
A0A178ESP5	Trichophyton rubrum	C5FNE6	Microsporum canis CBS 113480
A0A178ESP5	Trichophyton rubrum	D4AKL6	Trichophyton benhamiae CBS 112371
A0A178ESP5	Trichophyton rubrum	D4DHA3	Trichophyton verrucosum HKI 0517
A0A178ESP5	Trichophyton rubrum	E4UQJ7	Nannizzia gypsea CBS 118893
A0A178ESP5	Trichophyton rubrum	F2PLS6	Trichophyton equinum CBS 127.97
A0A178ESP5	Trichophyton rubrum	F2SKD9	Trichophyton rubrum CBS 118892
A0A179FPS4	Purpureocillium lilacinum	A0A179FPS4	Purpureocillium lilacinum
A0A179GNN7	Purpureocillium lilacinum	A0A179GNN7	Purpureocillium lilacinum
A0A191WFX2	Agromyces aureus	A0A191WFX2	Agromyces aureus
A0A194W182	Valsa mali	A0A194USQ0	Valsa mali var. pyri
A0A194W182	Valsa mali	A0A194W182	Valsa mali
A0A194XGZ6	Phialocephala scopiformis	A0A194XGZ6	Phialocephala scopiformis
A0A194XMA1	Phialocephala scopiformis	A0A194XMA1	Phialocephala scopiformis
A0A198AJ31	Paenibacillus sp. 1ZS3-15	A0A198AJ31	Paenibacillus sp. 1ZS3-15
A0A1A2Z6H1	Mycobacterium sp. E796	A0A1A2Z6H1	Mycobacterium sp. E796
A0A1A2Z6H1	Mycobacterium sp. E796	A0A1P8XBL5	Mycobacterium sp. MS1601
A0A1A5YUH4	Paenibacillus oryzae	A0A1A5YUH4	Paenibacillus oryzae
A0A1A7M138	Solibacillus silvestris	A0A1A7M138	Solibacillus silvestris
A0A1B1MYN6	Paenibacillus yonginensis	A0A1B1MYN6	Paenibacillus yonginensis
A0A1B7YSL2	Colletotrichum higginsianum IMI 349063	A0A1B7YSL2	Colletotrichum higginsianum IMI 349063
A0A1B7YT15	Colletotrichum higginsianum IMI 349063	A0A1B7YT15	Colletotrichum higginsianum IMI 349063
A0A1B8UPI2	Paenibacillus sp. KS1	A0A0D7KPZ7	Paenibacillus sp. E194
A0A1B8UPI2	Paenibacillus sp. KS1	A0A1B8UPI2	Paenibacillus sp. KS1
A0A1B8UPI2	Paenibacillus sp. KS1	A0A1E1VVC8	Paenibacillus sp. NAIST15-1
A0A1B8UPI2	Paenibacillus sp. KS1	A0A1G7NI20	Paenibacillus sp. cl6col
A0A1B8UPI2	Paenibacillus sp. KS1	A0A383RAI6
A0A1B8UPI2	Paenibacillus sp. KS1	K4ZJ31	Paenibacillus alvei DSM 29
A0A1B8UPI2	Paenibacillus sp. KS1	S9SKK4	Paenibacillus alvei TS-15
A0A1B8WPT8	Bacillus sp. FJAT-27264	A0A1B8WPT8	Bacillus sp. FJAT-27264
A0A1B9ZLH9	Bradyrhizobium paxllaeri	A0A0R3L624	Bradyrhizobium jicamae
A0A1B9ZLH9	Bradyrhizobium paxllaeri	A0A0R3N082	Bradyrhizobium lablabi
A0A1B9ZLH9	Bradyrhizobium paxllaeri	A0A1B9ZLH9	Bradyrhizobium paxllaeri
A0A1C1A2G2	Paenibacillus pectinilyticus	A0A1C1A2G2	Paenibacillus pectinilyticus
A0A1C3N0H1	Micromonospora krabiensis	A0A1C3N0H1	Micromonospora krabiensis
A0A1C7M5K9	Grifola frondosa	A0A1C7M5K9	Grifola frondosa
A0A1C7M6J8	Grifola frondosa	A0A1C7M6J8	Grifola frondosa
A0A1C7MD55	Grifola frondosa	A0A0C6DUW9	Grifola frondosa
A0A1C7MD55	Grifola frondosa	A0A1C7MD55	Grifola frondosa
A0A1E1K2F7	Rhynchosporium commune	A0A1E1K2F7	Rhynchosporium commune
A0A1E1K2F7	Rhynchosporium commune	A0A1E1LWL8	Rhynchosporium secalis
A0A1E1KCR3	Rhynchosporium commune	A0A1E1KCR3	Rhynchosporium commune
A0A1E1KCR3	Rhynchosporium commune	A0A1E1LFY8	Rhynchosporium agropyri
A0A1E1KCR3	Rhynchosporium commune	A0A1E1MP73	Rhynchosporium secalis
A0A1E1VBS3	Bosea sp. BIWAKO-01	A0A1E1VBS3	Bosea sp. BIWAKO-01
A0A1E2S2N2	Methyloligella halotolerans	A0A1E2S2N2	Methyloligella halotolerans
A0A1E3BGX3	Aspergillus cristatus	A0A017SNU9	Aspergillus ruber CBS 135680
A0A1E3BGX3	Aspergillus cristatus	A0A1E3BGX3	Aspergillus cristatus
A0A1E3L6P7	Paenibacillus sp. TI45-13ar	A0A1E3L6P7	Paenibacillus sp. TI45-13ar
A0A1E3WDY5	Methyloceanibacter marginalis	A0A1E3VWM4	Methyloceanibacter superfactus
A0A1E3WDY5	Methyloceanibacter marginalis	A0A1E3WDY5	Methyloceanibacter marginalis
A0A1E4HVA2	Planctomycetes bacterium SCN 63-9	A0A1E4HVA2	Planctomycetes bacterium SCN 63-9
A0A1E5LC80	Bacillus solimangrovi	A0A1E5LC80	Bacillus solimangrovi
A0A1F5LCJ1	Penicillium arizonense	A0A1F5LCJ1	Penicillium arizonense
A0A1F5LCJ1	Penicillium arizonense	A0A1V6QIP9	Penicillium antarcticum
A0A1G5TIU2	Methylobacterium sp. UNC378MF	A0A1G5TIU2	Methylobacterium sp. UNC378MF
A0A1G6DLY5	Bauldia litoralis	A0A1G6DLY5	Bauldia litoralis
A0A1G9VNA0	Methylobacterium phyllostachyos	A0A089NJ32	Methylobacterium oryzae CBMB20
A0A1G9VNA0	Methylobacterium phyllostachyos	A0A0C6FPW0	Methylobacterium aquaticum
A0A1G9VNA0	Methylobacterium phyllostachyos	A0A0J6RSP8	Methylobacterium indicum
A0A1G9VNA0	Methylobacterium phyllostachyos	A0A0J6S4V8	Methylobacterium aquaticum
A0A1G9VNA0	Methylobacterium phyllostachyos	A0A0J6VTY0	Methylobacterium tarhaniae
A0A1G9VNA0	Methylobacterium phyllostachyos	A0A0N0B711	Streptomyces purpurogeneiscleroticus
A0A1G9VNA0	Methylobacterium phyllostachyos	A0A147FJ28	Methylobacterium aquaticum
A0A1G9VNA0	Methylobacterium phyllostachyos	A0A179SE39	Methylobacterium platani
A0A1G9VNA0	Methylobacterium phyllostachyos	A0A1G9VNA0	Methylobacterium phyllostachyos
A0A1G9VNA0	Methylobacterium phyllostachyos	A0A1H8Y370	Methylobacterium sp. ap11
A0A1G9VNA0	Methylobacterium phyllostachyos	A0A1I2KHB2	Methylobacterium sp. yr596
A0A1G9VNA0	Methylobacterium phyllostachyos	A0A1I7H7M8	Methylobacterium sp. UNCCL125
A0A1G9VNA0	Methylobacterium phyllostachyos	A0A1I7JZ83	Methylobacterium sp. 174MFSha1.1
A0A1G9VNA0	Methylobacterium phyllostachyos	A0A2E7YBN6	Methylobacterium sp.
A0A1G9VNA0	Methylobacterium phyllostachyos	A0A2G8M8U7	Methylobacterium frigidaeris
A0A1G9VNA0	Methylobacterium phyllostachyos	A0A2R4WSG1	Methylobacterium sp. PR1016A
A0A1G9VNA0	Methylobacterium phyllostachyos	A0A2U8X2U1	Methylobacterium sp. 17Sr1-1
A0A1G9YY97	Afipia sp. GAS231	A0A1G9YY97	Afipia sp. GAS231
A0A1G9YY97	Afipia sp. GAS231	A0A1M5KIA3	Bradyrhizobium erythrophlei
A0A1G9YY97	Afipia sp. GAS231	A0A1M6I0M9	Bradyrhizobium lablabi
A0A1H0UWV7	Phyllobacterium sp. OV277	A0A1H0UWV7	Phyllobacterium sp. OV277
A0A1H1IC50	Rhizobiales bacterium GAS113	A0A1H1IC50	Rhizobiales bacterium GAS113
A0A1H2AGR1	Mucilaginibacter mallensis	A0A1H2AGR1	Mucilaginibacter mallensis
A0A1H2ZWF5	Marininema mesophilum	A0A1H2ZWF5	Marininema mesophilum
A0A1H3B975	Paenibacillus sp. CF384	A0A1H3B975	Paenibacillus sp. CF384
A0A1H3B975	Paenibacillus sp. CF384	A0A1I6QZS0	Paenibacillus sp. BC26
A0A1H4J0B8	Terriglobus roseus	A0A1H4J0B8	Terriglobus roseus
A0A1H4J1E6	Terriglobus roseus	A0A1H4J1E6	Terriglobus roseus
A0A1H4K0P8	Paenibacillus sp. GP183	A0A1H4K0P8	Paenibacillus sp. GP183
A0A1H4KTZ5	Terriglobus roseus	A0A1H4KTZ5	Terriglobus roseus
A0A1H5GE37	Bradyrhizobium erythrophlei	A0A1H5GE37	Bradyrhizobium erythrophlei
A0A1H5P9H9	Rhizobiales bacterium GAS191	A0A1H5P9H9	Rhizobiales bacterium GAS191
A0A1H5PCB4	Rhizobiales bacterium GAS191	A0A1H5PCB4	Rhizobiales bacterium GAS191
A0A1H5T3C8	Bryocella elongata	A0A1H5T3C8	Bryocella elongata
A0A1H6CAF6	Paenibacillus sp. UNC499MF	A0A0M0W6W4	Bacillus sp. FJAT-18019
A0A1H6CAF6	Paenibacillus sp. UNC499MF	A0A0M1P8D5	Paenibacillus solani
A0A1H6CAF6	Paenibacillus sp. UNC499MF	A0A1H6CAF6	Paenibacillus sp. UNC499MF
A0A1H6QNJ6	Dyadobacter koreensis	A0A1H6QNJ6	Dyadobacter koreensis
A0A1H7Z1T6	Paenibacillus sp. OV219	A0A1H7Z1T6	Paenibacillus sp. OV219
A0A1H8S8Y2	Rhizobium tibeticum	A0A0Q8NU10	Rhizobium sp. Root708
A0A1H8S8Y2	Rhizobium tibeticum	A0A1H8S8Y2	Rhizobium tibeticum
A0A1H8S8Y2	Rhizobium tibeticum	J2LER8	Rhizobium sp. CF142
A0A1H8S8Y2	Rhizobium tibeticum	J2RKU7	Rhizobium sp. CF122
A0A1H9VC73	Pedobacter rhizosphaerae	A0A0J0Y381	Pedobacter sp. BMA
A0A1H9VC73	Pedobacter rhizosphaerae	A0A1H9VC73	Pedobacter rhizosphaerae
A0A1I0JKP4	Paenibacillus sp. NFR01	A0A1I0JKP4	Paenibacillus sp. NFR01
A0A1I0S5E4	Chitinophaga arvensicola	A0A1I0S5E4	Chitinophaga arvensicola
A0A1I2BUK6	Paenibacillus catalpae	A0A1I2BUK6	Paenibacillus catalpae
A0A1I2BUK6	Paenibacillus catalpae	C6CTK8	Paenibacillus sp. JDR-2
A0A1I3CGS3	Planctomicrobium piriforme	A0A1I3CGS3	Planctomicrobium piriforme
A0A1I3D1K0	Planctomicrobium piriforme	A0A1I3D1K0	Planctomicrobium piriforme
A0A1I3GX53	Bosea sp. OK403	A0A1I3GX53	Bosea sp. OK403
A0A1I3NUA5	Paenibacillus sp. UNC496MF	A0A1I3NUA5	Paenibacillus sp. UNC496MF
A0A1I3NUA5	Paenibacillus sp. UNC496MF	A0A2V2YW20	Paenibacillus cellulosilyticus
A0A1I3W698	Methylocapsa palsarum	A0A1I3W698	Methylocapsa palsarum
A0A1I3YWQ5	Methylocapsa palsarum	A0A1I3YWQ5	Methylocapsa palsarum
A0A1I4SMD4	Methylobacterium pseudosasicola	A0A1I4SMD4	Methylobacterium pseudosasicola
A0A1I6WNT0	Methylobacterium sp. yr668	A0A1I6WNT0	Methylobacterium sp. yr668
A0A1I7B8I3	Pseudovibrio denitrificans	A0A165QV83	Pseudovibrio sp. W74
A0A1I7B8I3	Pseudovibrio denitrificans	A0A165W6F3	Pseudovibrio sp. Ad26
A0A1I7B8I3	Pseudovibrio denitrificans	A0A1I7B8I3	Pseudovibrio denitrificans
A0A1I7B8I3	Pseudovibrio denitrificans	B6R1K8	Pseudovibrio sp. JE062
A0A1I7B8I3	Pseudovibrio denitrificans	G8PPL2	Pseudovibrio sp. FO-BEG1
A0A1I7I3C1	Streptococcus gallolyticus	A0A1I7I3C1	Streptococcus gallolyticus
A0A1I7I3C1	Streptococcus gallolyticus	A0A1S5W9S3	Streptococcus gallolyticus subsp. gallolyticus DSM
A0A1I7I3C1	Streptococcus gallolyticus	F3UMY2	Streptococcus sanguinis SK355
A0A1I7I3C1	Streptococcus gallolyticus	J3AL76	Streptococcus ratti FA-1 = DSM 20564
A0A1I7LT58	Bradyrhizobium arachidis	A0A023XGS2	Bradyrhizobium japonicum SEMIA 5079
A0A1I7LT58	Bradyrhizobium arachidis	A0A0A3YXX2	Bradyrhizobium japonicum
A0A1I7LT58	Bradyrhizobium arachidis	A0A0Q5ZME4	Bradyrhizobium sp. Leaf396
A0A1I7LT58	Bradyrhizobium arachidis	A0A0R3MWN1	Bradyrhizobium retamae
A0A1I7LT58	Bradyrhizobium arachidis	A0A109Q5H1	Bradyrhizobium sp. CCGE-LA001
A0A1I7LT58	Bradyrhizobium arachidis	A0A150U8L7	Bradyrhizobium sp. AT1
A0A1I7LT58	Bradyrhizobium arachidis	A0A150ZE32	Bradyrhizobium sp. DOA1
A0A1I7LT58	Bradyrhizobium arachidis	A0A151FHS8	Bradyrhizobium liaoningense
A0A1I7LT58	Bradyrhizobium arachidis	A0A176YUZ4	Bradyrhizobium sp. BR 10245
A0A1I7LT58	Bradyrhizobium arachidis	A0A176ZHW9	Bradyrhizobium neotropicale
A0A1I7LT58	Bradyrhizobium arachidis	A0A1C3U362	Bradyrhizobium shewense
A0A1I7LT58	Bradyrhizobium arachidis	A0A1H8KN78	Bradyrhizobium sp. OK095
A0A1I7LT58	Bradyrhizobium arachidis	A0A1I7LT58	Bradyrhizobium arachidis
A0A1I7LT58	Bradyrhizobium arachidis	A0A1L3FIH7	Bradyrhizobium japonicum
A0A1I7LT58	Bradyrhizobium arachidis	A0A1V5EU28	Bradyrhizobium sp. BR10280
A0A1I7LT58	Bradyrhizobium arachidis	A0A1Y2JLM4	Bradyrhizobium japonicum
A0A1I7LT58	Bradyrhizobium arachidis	A0A2A6N1H9	Bradyrhizobium diazoefficiens
A0A1I7LT58	Bradyrhizobium arachidis	A0A2M8REJ8	Bradyrhizobium sp. INPA54B
A0A1I7LT58	Bradyrhizobium arachidis	A0A2S6MTA4	Bradyrhizobium sp. AC87j1
A0A1I7LT58	Bradyrhizobium arachidis	A0A2T2Q1N7	Bradyrhizobium sp. MOS003
A0A1I7LT58	Bradyrhizobium arachidis	A0A2T2QRK3	Bradyrhizobium sp. MOS002
A0A1I7LT58	Bradyrhizobium arachidis	A0A2U8PRY1	Bradyrhizobium sp. 2 39S1MB
A0A1I7LT58	Bradyrhizobium arachidis	A0A2U8Q9P4	Bradyrhizobium sp. 3 85S1MB
A0A1I7LT58	Bradyrhizobium arachidis	A0A348TKB8
A0A1I7LT58	Bradyrhizobium arachidis	G7DNP8	Bradyrhizobium japonicum USDA 6
A0A1I7LT58	Bradyrhizobium arachidis	H0TWI4	Bradyrhizobium sp. STM 3843
A0A1I7LT58	Bradyrhizobium arachidis	I0G1B8	Bradyrhizobium sp. S23321
A0A1I7LT58	Bradyrhizobium arachidis	I2QG28	Bradyrhizobium sp. WSM1253
A0A1I7M1T9	Methylobacterium sp. 174MFSha1.1	A0A1I7M1T9	Methylobacterium sp. 174MFSha1.1
A0A1I7M1T9	Methylobacterium sp. 174MFSha1.1	A0A2R4WDJ8	Methylobacterium sp. PR1016A
A0A1I7M1T9	Methylobacterium sp. 174MFSha1.1	A0A2U8X080	Methylobacterium sp. 17Sr1-1
A0A1I7NK57	Hyphomicrobium facile	A0A1I7NK57	Hyphomicrobium facile
A0A1J7II94	Coniochaeta ligniaria NRRL 30616	A0A1J7II94	Coniochaeta ligniaria NRRL 30616
A0A1J7JA33	Coniochaeta ligniaria NRRL 30616	A0A1J7JA33	Coniochaeta ligniaria NRRL 30616
A0A1J7JH90	Coniochaeta ligniaria NRRL 30616	A0A1J7JH90	Coniochaeta ligniaria NRRL 30616
A0A1J8Q6Z7	Rhizopogon vesiculosus	A0A1B7NEY0	Rhizopogon vinicolor AM-OR11-026
A0A1J8Q6Z7	Rhizopogon vesiculosus	A0A1J8Q6Z7	Rhizopogon vesiculosus
A0A1J8QSY2	Rhizopogon vesiculosus	A0A1B7MR61	Rhizopogon vinicolor AM-OR11-026
A0A1J8QSY2	Rhizopogon vesiculosus	A0A1J8QSY2	Rhizopogon vesiculosus
A0A1J9QZY2	Diplodia corticola	A0A0G2EKS8	Diplodia seriata
A0A1J9QZY2	Diplodia corticola	A0A1J9QZY2	Diplodia corticola
A0A1J9QZY2	Diplodia corticola	K2RD20	Macrophomina phaseolina MS6
A0A1J9QZY2	Diplodia corticola	R1E9V1	Neofusicoccum parvum UCRNP2
A0A1K1PY14	Paenibacillus sp. UNCCL117	A0A1G4QQP3	Paenibacillus tianmuensis
A0A1K1PY14	Paenibacillus sp. UNCCL117	A0A1K1PY14	Paenibacillus sp. UNCCL117
A0A1K1PY14	Paenibacillus sp. UNCCL117	V6M6K4	Brevibacillus panacihumi W25
A0A1K1V176	Thermoactinomyces sp. DSM 45891	A0A1H3HLP6	Thermoactinomyces sp. DSM 45892
A0A1K1V176	Thermoactinomyces sp. DSM 45891	A0A1K1V176	Thermoactinomyces sp. DSM 45891
A0A1L3FIM3	Bradyrhizobium japonicum	A0A023XHN5	Bradyrhizobium japonicum SEMIA 5079
A0A1L3FIM3	Bradyrhizobium japonicum	A0A0A3XS04	Bradyrhizobium japonicum
A0A1L3FIM3	Bradyrhizobium japonicum	A0A160V1W1	Bradyrhizobium sp. G22
A0A1L3FIM3	Bradyrhizobium japonicum	A0A1L3FIM3	Bradyrhizobium japonicum
A0A1L3FIM3	Bradyrhizobium japonicum	A0A2U8Q7J6	Bradyrhizobium sp. 3 85S1MB
A0A1L3FIM3	Bradyrhizobium japonicum	G7DNI0	Bradyrhizobium japonicum USDA 6
A0A1L6L4F3	Minicystis rosea	A0A1L6L4F3	Minicystis rosea
A0A1L7AIR2	Roseomonas gilardii	A0A1L7AIR2	Roseomonas gilardii
A0A1L7AIR2	Roseomonas gilardii	A0A1Q2YZF4	Roseomonas sp. TAS13
A0A1L7AIR2	Roseomonas gilardii	A0A1S8D7T7	Roseomonas mucosa
A0A1L7AIR2	Roseomonas gilardii	A0A2D2H6X4	Roseomonas sp. FDAARGOS_362
A0A1L7AIR2	Roseomonas gilardii	A0A2W5ED06	Azospirillum brasilense
A0A1L7AIR2	Roseomonas gilardii	A0A379P596
A0A1L7LGT3	Streptococcus troglodytae	A0A1L7LGT3	Streptococcus troglodytae
A0A1L7LGT3	Streptococcus troglodytae	A0A2J9QCX5	Streptococcus mutans
A0A1L7LGT3	Streptococcus troglodytae	Q8DWC5	Streptococcus mutans UA159
A0A1L7TCR0	Fusarium mangiferae	A0A0D2Y0Q3	Fusarium oxysporum f. sp. lycopersici 4287
A0A1L7TCR0	Fusarium mangiferae	A0A0I9Y4J5	Fusarium fujikuroi
A0A1L7TCR0	Fusarium mangiferae	A0A0J9VDU7	Fusarium oxysporum f. sp. lycopersici 4287
A0A1L7TCR0	Fusarium mangiferae	A0A1L7TCR0	Fusarium mangiferae
A0A1L7TCR0	Fusarium mangiferae	A0A1L7VVW0	Fusarium proliferatum ET1
A0A1L7TCR0	Fusarium mangiferae	A0A2H3G9Y8	Fusarium oxysporum f. sp. radicis-cucumerinum
A0A1L7TCR0	Fusarium mangiferae	A0A2H3S1I8	Fusarium fujikuroi
A0A1L7TCR0	Fusarium mangiferae	A0A2H3U9V7	Fusarium oxysporum
A0A1L7TCR0	Fusarium mangiferae	A0A2K0WFJ3	Fusarium nygamai
A0A1L7TCR0	Fusarium mangiferae	A0A366PCL1
A0A1L7TCR0	Fusarium mangiferae	A0A366RDH7
A0A1L7TCR0	Fusarium mangiferae	F9F2W1	Fusarium oxysporum Fo5176
A0A1L7TCR0	Fusarium mangiferae	N1S481	Fusarium oxysporum f. sp. cubense race 4
A0A1L7TCR0	Fusarium mangiferae	N4U777	Fusarium oxysporum f. sp. cubense race 1
A0A1L7TCR0	Fusarium mangiferae	W7MDF0	Fusarium verticillioides 7600
A0A1L7TCR0	Fusarium mangiferae	W9HRG6	Fusarium oxysporum FOSC 3-a
A0A1L7TCR0	Fusarium mangiferae	W9JSE1	Fusarium oxysporum Fo47
A0A1L7TCR0	Fusarium mangiferae	W9P1B2	Fusarium oxysporum f. sp. pisi HDV247
A0A1L7TCR0	Fusarium mangiferae	W9ZBF0	Fusarium oxysporum f. sp. melonis 26406
A0A1L7TCR0	Fusarium mangiferae	X0CQX1	Fusarium oxysporum f. sp. raphani 54005
A0A1L7TCR0	Fusarium mangiferae	X0LDM9	Fusarium oxysporum f. sp. vasinfectum 25433
A0A1L7X5Q2	Phialocephala subalpina	A0A194X6A8	Phialocephala scopiformis
A0A1L7X5Q2	Phialocephala subalpina	A0A1L7X5Q2	Phialocephala subalpina
A0A1L7X8J1	Phialocephala subalpina	A0A1L7X8J1	Phialocephala subalpina
A0A1L7X8J1	Phialocephala subalpina	A0A2J6PWJ6	Pezoloma ericae
A0A1L7X8J1	Phialocephala subalpina	A0A2J6RQ15	Meliniomyces variabilis F
A0A1L7X8J1	Phialocephala subalpina	A0A2J6SWL6	Meliniomyces bicolor E
A0A1L9PR23	Aspergillus versicolor CBS 583.65	A0A1L9PR23	Aspergillus versicolor CBS 583.65
A0A1L9PR23	Aspergillus versicolor CBS 583.65	A0A1L9TLE3	Aspergillus sydowii CBS 593.65
A0A1L9R961	Aspergillus wentii DTO 134E9	A0A1L9R961	Aspergillus wentii DTO 134E9
A0A1L9RLQ4	Aspergillus wentii DTO 134E9	A0A1L9RLQ4	Aspergillus wentii DTO 134E9
A0A1L9SDG1	Penicilliopsis zonata CBS 506.65	A0A1L9SDG1	Penicilliopsis zonata CBS 506.65
A0A1L9T2L3	Aspergillus sydowii CBS 593.65	A0A1L9Q222	Aspergillus versicolor CBS 583.65
A0A1L9T2L3	Aspergillus sydowii CBS 593.65	A0A1L9T2L3	Aspergillus sydowii CBS 593.65
A0A1L9VX42	Aspergillus glaucus CBS 516.65	A0A017S3D7	Aspergillus ruber CBS 135680
A0A1L9VX42	Aspergillus glaucus CBS 516.65	A0A1E3BKH8	Aspergillus cristatus
A0A1L9VX42	Aspergillus glaucus CBS 516.65	A0A1L9VKZ6	Aspergillus glaucus CBS 516.65
A0A1L9VX42	Aspergillus glaucus CBS 516.65	A0A1L9VX42	Aspergillus glaucus CBS 516.65
A0A1M2V787	Trametes pubescens	A0A1M2V787	Trametes pubescens
A0A1M2VC13	Trametes pubescens	A0A1M2VC13	Trametes pubescens
A0A1M2VUQ3	Trametes pubescens	A0A1M2VUQ3	Trametes pubescens
A0A1M2W7Z5	Trametes pubescens	A0A1M2W7Z5	Trametes pubescens
A0A1M2W7Z5	Trametes pubescens	Q6UGB9	Trametes versicolor
A0A1M3CUH6	Chlamydiales bacterium 38-26	A0A1M3CUH6	Chlamydiales bacterium 38-26
A0A1M3Q1P1	Rhizobium sp. 60-20	A0A1B9S7C3	Rhizobium sp. AC27/96
A0A1M3Q1P1	Rhizobium sp. 60-20	A0A1E4Y729	Rhizobium sp. YK2
A0A1M3Q1P1	Rhizobium sp. 60-20	A0A1M3Q1P1	Rhizobium sp. 60-20
A0A1M3Q1P1	Rhizobium sp. 60-20	A0A1V3G3E3	Rhizobium sp. P44RR-XXIV
A0A1M3Q1P1	Rhizobium sp. 60-20	A0A248WEX8	Rhizobium sp. 11515TR
A0A1M4TU62	Chryseobacterium arachidis	A0A077KL20	Chryseobacterium sp. StRB126
A0A1M4TU62	Chryseobacterium arachidis	A0A085BAE3	Chryseobacterium sp. FH1
A0A1M4TU62	Chryseobacterium arachidis	A0A085BK15	Chryseobacterium halperniae
A0A1M4TU62	Chryseobacterium arachidis	A0A085Z826	Chryseobacterium formosense
A0A1M4TU62	Chryseobacterium arachidis	A0A0B4CRX9	Chryseobacterium taiwanense
A0A1M4TU62	Chryseobacterium arachidis	A0A0D0EE64	Flavobacterium hibernum
A0A1M4TU62	Chryseobacterium arachidis	A0A0M9VGR5	Flavobacterium akiainvivens
A0A1M4TU62	Chryseobacterium arachidis	A0A0Q4LM31	Pedobacter sp. Leaf41
A0A1M4TU62	Chryseobacterium arachidis	A0A0Q5QJW6	Chryseobacterium sp. Leaf180
A0A1M4TU62	Chryseobacterium arachidis	A0A0Q5ZQB4	Chryseobacterium sp. Leaf404
A0A1M4TU62	Chryseobacterium arachidis	A0A0Q6B2R1	Chryseobacterium sp. Leaf405
A0A1M4TU62	Chryseobacterium arachidis	A0A150ZW22	Chryseobacterium cucumeris
A0A1M4TU62	Chryseobacterium arachidis	A0A172Y170	Chryseobacterium glaciei
A0A1M4TU62	Chryseobacterium arachidis	A0A177LPX7	Chryseobacterium sp. FP211-J200
A0A1M4TU62	Chryseobacterium arachidis	A0A1B9YA79	Chryseobacterium sp. CBo1
A0A1M4TU62	Chryseobacterium arachidis	A0A1G7SE13	Chryseobacterium hungaricum
A0A1M4TU62	Chryseobacterium arachidis	A0A1H8C6L0	Chryseobacterium taichungense
A0A1M4TU62	Chryseobacterium arachidis	A0A1I0NLD1	Chryseobacterium wanjuense
A0A1M4TU62	Chryseobacterium arachidis	A0A1K2IGK3	Chryseobacterium limigenitum
A0A1M4TU62	Chryseobacterium arachidis	A0A1M4TU62	Chryseobacterium arachidis
A0A1M4TU62	Chryseobacterium arachidis	A0A1M5JKD4	Chryseobacterium oranimense
A0A1M4TU62	Chryseobacterium arachidis	A0A1M6TDD8	Chryseobacterium molle
A0A1M4TU62	Chryseobacterium arachidis	A0A1N6EH33	Chryseobacterium scophthalmum
A0A1M4TU62	Chryseobacterium arachidis	A0A1N6FEJ6	Chryseobacterium zeae
A0A1M4TU62	Chryseobacterium arachidis	A0A1P8E7F1	Sphingobacterium sp. B29
A0A1M4TU62	Chryseobacterium arachidis	A0A2M9C7Z3	Chryseobacterium geocarposphaerae
A0A1M4TU62	Chryseobacterium arachidis	A0A2S1YNY7	Flavobacterium sp. HYN0056
A0A1M4TU62	Chryseobacterium arachidis	A0A2T5Y259	Sphingobacterium faecium
A0A1M4TU62	Chryseobacterium arachidis	A0A2V2ZJ36	Chryseobacterium sp. AG844
A0A1M4TU62	Chryseobacterium arachidis	A0A2W6SWR1	Chryseobacterium sp.
A0A1M4TU62	Chryseobacterium arachidis	A0A2W6YLM1	Chryseobacterium sp.
A0A1M4TU62	Chryseobacterium arachidis	A0A2X2SPM9
A0A1M4TU62	Chryseobacterium arachidis	A0A381F4J1
A0A1M4TU62	Chryseobacterium arachidis	A0A381FBQ3
A0A1M4TU62	Chryseobacterium arachidis	D7W1P0	Chryseobacterium gleum ATCC 35910
A0A1M4ZWV2	Seinonella peptonophila	A0A1M4ZWV2	Seinonella peptonophila
A0A1M5DJY7	Kaistia soli DSM 19436	A0A1M5DJY7	Kaistia soli DSM 19436
A0A1M5GMX6	Bradyrhizobium erythrophlei	A0A1M5GMX6	Bradyrhizobium erythrophlei
A0A1M5GWR8	Bradyrhizobium erythrophlei	A0A1M5GWR8	Bradyrhizobium erythrophlei
A0A1M5KYB3	Bradyrhizobium erythrophlei	A0A0D7Q5H1	Bradyrhizobium sp. LTSPM299
A0A1M5KYB3	Bradyrhizobium erythrophlei	A0A0R3M4L0	Bradyrhizobium valentinum
A0A1M5KYB3	Bradyrhizobium erythrophlei	A0A1H2AWM1	Bradyrhizobium canariense
A0A1M5KYB3	Bradyrhizobium erythrophlei	A0A1M5KYB3	Bradyrhizobium erythrophlei
A0A1M5KYB3	Bradyrhizobium erythrophlei	A0A1M5YXU0	Bradyrhizobium erythrophlei
A0A1M5KYB3	Bradyrhizobium erythrophlei	A0A1M7DSU7	Bradyrhizobium lablabi
A0A1M5KYB3	Bradyrhizobium erythrophlei	A0A2M8ZXA6	Afipia broomeae
A0A1M5R3F4	Bradyrhizobium erythrophlei	A0A1M5R3F4	Bradyrhizobium erythrophlei
A0A1M5RA13	Bradyrhizobium erythrophlei	A0A1M5RA13	Bradyrhizobium erythrophlei
A0A1M5RA13	Bradyrhizobium erythrophlei	A0A1N6JVQ7	Bradyrhizobium erythrophlei
A0A1M5TYD6	Sporobacter termitidis DSM 10068	A0A1M5TYD6	Sporobacter termitidis DSM 10068
A0A1M5VZH5	Bradyrhizobium erythrophlei	A0A1H2B9T8	Bradyrhizobium canariense
A0A1M5VZH5	Bradyrhizobium erythrophlei	A0A1M5JYW3	Bradyrhizobium erythrophlei
A0A1M5VZH5	Bradyrhizobium erythrophlei	A0A1M5VZH5	Bradyrhizobium erythrophlei
A0A1M5VZH5	Bradyrhizobium erythrophlei	A0A1M7DNJ9	Bradyrhizobium lablabi
A0A1M5VZH5	Bradyrhizobium erythrophlei	A0A2M8ZYC1	Afipia broomeae
A0A1M6VWK8	Bradyrhizobium lablabi	A0A0D7Q2V9	Bradyrhizobium sp. LTSPM299
A0A1M6VWK8	Bradyrhizobium lablabi	A0A0R3L6S3	Bradyrhizobium valentinum
A0A1M6VWK8	Bradyrhizobium lablabi	A0A1M6VWK8	Bradyrhizobium lablabi
A0A1M6VWK8	Bradyrhizobium lablabi	A0A1M7DSB5	Bradyrhizobium lablabi
A0A1M6VWK8	Bradyrhizobium lablabi	A0A1N6HC80	Bradyrhizobium erythrophlei
A0A1M7BDS5	Anaerocolumna jejuensis DSM 15929	A0A1M7BDS5	Anaerocolumna jejuensis DSM 15929
A0A1M7H0V5	Chitinophaga jiangningensis	A0A1M7H0V5	Chitinophaga jiangningensis
A0A1M7TDN3	Bradyrhizobium erythrophlei	A0A1M7TDN3	Bradyrhizobium erythrophlei
A0A1M7U5T6	Bradyrhizobium erythrophlei	A0A1M7U5T6	Bradyrhizobium erythrophlei
A0A1M7ZFJ3	Pseudoxanthobacter soli DSM 19599	A0A1M7ZFJ3	Pseudoxanthobacter soli DSM 19599
A0A1N5V6K4	Micromonospora cremea	A0A1N5V6K4	Micromonospora cremea
A0A1N6HEC6	Bradyrhizobium erythrophlei	A0A1N6HEC6	Bradyrhizobium erythrophlei
A0A1N6HEC6	Bradyrhizobium erythrophlei	A0A2H9VJK7	Bradyrhizobium lablabi
A0A1N6IVP6	Paraburkholderia phenazinium	A0A1I3L5J0	Paraburkholderia megapolitana
A0A1N6IVP6	Paraburkholderia phenazinium	A0A1N6IE73	Paraburkholderia phenazinium
A0A1N6IVP6	Paraburkholderia phenazinium	A0A1N6IVP6	Paraburkholderia phenazinium
A0A1N6IVP6	Paraburkholderia phenazinium	A0A1N6JYB6	Paraburkholderia phenazinium
A0A1N6IVP6	Paraburkholderia phenazinium	A0A2A4ESM0	Pseudomonas acidophila
A0A1N6JNC4	Paraburkholderia phenazinium	A0A095XEY8	Burkholderia gladioli
A0A1N6JNC4	Paraburkholderia phenazinium	A0A0B6RJ39	Burkholderia glumae PG1
A0A1N6JNC4	Paraburkholderia phenazinium	A0A1N6JNC4	Paraburkholderia phenazinium
A0A1N6JNC4	Paraburkholderia phenazinium	A0A1X7L4K4	Paraburkholderia susongensis
A0A1N6JNC4	Paraburkholderia phenazinium	A0A2J9HCU8	Burkholderia glumae
A0A1N6JNC4	Paraburkholderia phenazinium	A0A372JXM5
A0A1N6JNC4	Paraburkholderia phenazinium	W0V914	Janthinobacterium agaricidamnosum NBRC 102515 = DS
A0A1N6PI53	Mucilaginibacter lappiensis	A0A1N6PI53	Mucilaginibacter lappiensis
A0A1N6T806	Paenibacillus macquariensis	A0A168I1E7	Paenibacillus macquariensis subsp. defensor
A0A1N6T806	Paenibacillus macquariensis	A0A1N6T806	Paenibacillus macquariensis
A0A1N7F909	Bacillus sp. RUPDJ	A0A0D1KBF4	Bacillus subtilis
A0A1N7F909	Bacillus sp. RUPDJ	A0A0T8PLU5	Streptococcus pneumoniae
A0A1N7F909	Bacillus sp. RUPDJ	A0A150F5C8	Bacillus nakamurai
A0A1N7F909	Bacillus sp. RUPDJ	A0A164ZZX0	Bacillus subtilis
A0A1N7F909	Bacillus sp. RUPDJ	A0A1J5XMR4	Bacillus sp. FMQ74
A0A1N7F909	Bacillus sp. RUPDJ	A0A1N7F909	Bacillus sp. RUPDJ
A0A1N7F909	Bacillus sp. RUPDJ	A0A1Q9FLW0	Bacillus licheniformis
A0A1N7F909	Bacillus sp. RUPDJ	A0A1U3R0I4	Mycobacteroides abscessus subsp. massiliense
A0A1N7F909	Bacillus sp. RUPDJ	A0A1V4FV48	Bacillus intestinalis
A0A1N7F909	Bacillus sp. RUPDJ	A0A1W6HMI6	Bacillus vallismortis
A0A1N7F909	Bacillus sp. RUPDJ	A0A1X7CP07	Bacillus sp. CC120222-01
A0A1N7F909	Bacillus sp. RUPDJ	A0A1Y0WY19	Bacillus licheniformis
A0A1N7F909	Bacillus sp. RUPDJ	A0A1Y0XCN9	Bacillus amyloliquefaciens
A0A1N7F909	Bacillus sp. RUPDJ	A0A268DT85	Bacillus siamensis
A0A1N7F909	Bacillus sp. RUPDJ	A0A2A2VV70	Bacillus sp. 7705b
A0A1N7F909	Bacillus sp. RUPDJ	A0A2I7SZV2	Bacillus subtilis
A0A1N7F909	Bacillus sp. RUPDJ	A0A2K9K7J3	Bacillus siamensis
A0A1N7F909	Bacillus sp. RUPDJ	A0A2L0QDT6	Bacillus cereus
A0A1N7F909	Bacillus sp. RUPDJ	A0A2L0REL7	Bacillus sp. MBGLi79
A0A1N7F909	Bacillus sp. RUPDJ	A0A2M8SVM2	Bacillus sp. SN1
A0A1N7F909	Bacillus sp. RUPDJ	A0A2M9VVS6	Bacillus vallismortis
A0A1N7F909	Bacillus sp. RUPDJ	A0A2N1KAS9	Bacillus sp. SN32
A0A1N7F909	Bacillus sp. RUPDJ	A0A2S9WNT6	Bacillus halotolerans
A0A1N7F909	Bacillus sp. RUPDJ	A0A2U8R7F7	Bacillus subtilis subsp. inaquosorum
A0A1N7F909	Bacillus sp. RUPDJ	A0A2V1Z810	Bacillus sp. VMFN-A1
A0A1N7F909	Bacillus sp. RUPDJ	A0A2X0X8X8	Bacillus tequilensis
A0A1N7F909	Bacillus sp. RUPDJ	A0A2X0YC36	Bacillus subtilis subsp. spizizenii
A0A1N7F909	Bacillus sp. RUPDJ	A0A2X1V7S2	Paenibacillus polymyxa
A0A1N7F909	Bacillus sp. RUPDJ	A0A2Z4U0I1
A0A1N7F909	Bacillus sp. RUPDJ	A0A2Z5NXN7
A0A1N7F909	Bacillus sp. RUPDJ	A0A347BBK5
A0A1N7F909	Bacillus sp. RUPDJ	I0F8U6	Bacillus sp. JS
A0A1N7F909	Bacillus sp. RUPDJ	M4KVX2	Bacillus subtilis XF-1
A0A1N7F909	Bacillus sp. RUPDJ	O34714	Bacillus subtilis subsp. subtilis str. 168
A0A1N7F909	Bacillus sp. RUPDJ	U1YQM6	Bacillus sp. EGD-AK10
A0A1N7H709	Bacillus sp. RUPDJ	A0A0D7XQL0	Bacillus amyloliquefaciens
A0A1N7H709	Bacillus sp. RUPDJ	A0A0U0D2J6	Streptococcus pneumoniae
A0A1N7H709	Bacillus sp. RUPDJ	A0A150F935	Bacillus nakamurai
A0A1N7H709	Bacillus sp. RUPDJ	A0A172XJK4	Bacillus velezensis
A0A1N7H709	Bacillus sp. RUPDJ	A0A1N7H709	Bacillus sp. RUPDJ
A0A1N7H709	Bacillus sp. RUPDJ	A0A1U3NZD9	Mycobacteroides abscessus subsp. massiliense
A0A1N7H709	Bacillus sp. RUPDJ	A0A1Y0XGF9	Bacillus amyloliquefaciens
A0A1N7H709	Bacillus sp. RUPDJ	A0A268DQT9	Bacillus siamensis
A0A1N7H709	Bacillus sp. RUPDJ	A0A2D3DPW1	Bacillus subtilis
A0A1N7H709	Bacillus sp. RUPDJ	A0A2H6MIJ9	Bacillus amyloliquefaciens
A0A1N7H709	Bacillus sp. RUPDJ	A0A2K9KAZ2	Bacillus siamensis
A0A1N7H709	Bacillus sp. RUPDJ	A0A2R3EI86	Bacillus velezensis
A0A1N7H709	Bacillus sp. RUPDJ	A0A2S4ER00	Bacillus amyloliquefaciens
A0A1N7H709	Bacillus sp. RUPDJ	A0A2S7LC15	Bacillus velezensis
A0A1N7H709	Bacillus sp. RUPDJ	A0A2V1Z3G6	Bacillus sp. VMFN-A1
A0A1N7H709	Bacillus sp. RUPDJ	A0A2Z5T1S9
A0A1N7H709	Bacillus sp. RUPDJ	A0A369CEE4
A0A1N7H709	Bacillus sp. RUPDJ	A7Z603	Bacillus velezensis FZB42
A0A1N7H709	Bacillus sp. RUPDJ	I2C702	Bacillus amyloliquefaciens Y2
A0A1N7H709	Bacillus sp. RUPDJ	I2HSE8	Bacillus sp. 5B6
A0A1N7H709	Bacillus sp. RUPDJ	S6FM00	Bacillus velezensis UCMB5033
A0A1P8XME6	Streptomyces autolyticus	A0A1C5DQH7	Streptomyces sp. MnatMP-M27
A0A1P8XME6	Streptomyces autolyticus	A0A1P8XME6	Streptomyces autolyticus
A0A1P8XME6	Streptomyces autolyticus	A0A2J7Z222	Streptomyces malaysiensis
A0A1P8XME6	Streptomyces autolyticus	A0A2K8RKM6	Streptomyces sp. M56
A0A1P8XME6	Streptomyces autolyticus	D7BSQ5	Streptomyces bingchenggensis BCW-1
A0A1Q2D637	Vagococcus penaei	A0A1Q2D637	Vagococcus penaei
A0A1Q3DUM0	Lentinula edodes	A0A1Q3DUM0	Lentinula edodes
A0A1Q3DW62	Lentinula edodes	A0A1Q3DW62	Lentinula edodes
A0A1Q3KMW2	Alphaproteobacteria bacterium 65-37	A0A1Q3KMW2	Alphaproteobacteria bacterium 65-37
A0A1Q4HJT9	Mycolicibacterium diernhoferi	A0A1Q4HJT9	Mycolicibacterium diernhoferi
A0A1Q4HJT9	Mycolicibacterium diernhoferi	A0A1T3WGI1	Mycolicibacterium diernhoferi
A0A1Q4HJT9	Mycolicibacterium diernhoferi	A0A1X1VMW6	Mycolicibacter hiberniae
A0A1Q5D007	Micromonospora sp. CB01531	A0A1Q5D007	Micromonospora sp. CB01531
A0A1Q5SRF7	Penicillium subrubescens	A0A0F7TMD2	Penicillium brasilianum
A0A1Q5SRF7	Penicillium subrubescens	A0A1Q5SRF7	Penicillium subrubescens
A0A1Q5SRF7	Penicillium subrubescens	A0A1S9RE45	Penicillium brasilianum
A0A1Q5SRF7	Penicillium subrubescens	A0A1V6P025	Penicillium decumbens
A0A1Q5SRF7	Penicillium subrubescens	S7ZLV6	Penicillium oxalicum 114-2
A0A1Q5U4F1	Penicillium subrubescens	A0A1Q5U4F1	Penicillium subrubescens
A0A1Q5UR92	Penicillium subrubescens	A0A0F7TMV4	Penicillium brasilianum
A0A1Q5UR92	Penicillium subrubescens	A0A1Q5UR92	Penicillium subrubescens
A0A1Q5UR92	Penicillium subrubescens	A0A1S9RSM7	Penicillium brasilianum
A0A1Q5UR92	Penicillium subrubescens	A0A1V6NCG2	Penicillium polonicum
A0A1Q5UR92	Penicillium subrubescens	A0A1V6PIA5	Penicillium decumbens
A0A1Q5UR92	Penicillium subrubescens	A0A1V6R921	Penicillium solitum
A0A1Q5UR92	Penicillium subrubescens	A0A1V6TMY0	Penicillium steckii
A0A1Q5WBV8	Serratia marcescens	A0A086GF10	Serratia nematodiphila DZ0503SBS1
A0A1Q5WBV8	Serratia marcescens	A0A0P0QFA0	Serratia marcescens
A0A1Q5WBV8	Serratia marcescens	A0A0U6I3X2	Serratia marcescens
A0A1Q5WBV8	Serratia marcescens	A0A0X2P2X3	Serratia sp. LCN16
A0A1Q5WBV8	Serratia marcescens	A0A140EZX6	Serratia rubidaea
A0A1Q5WBV8	Serratia marcescens	A0A168Q002	Klebsiella oxytoca
A0A1Q5WBV8	Serratia marcescens	A0A1C0FGW8	Serratia marcescens subsp. marcescens
A0A1Q5WBV8	Serratia marcescens	A0A1C3HDH1	Serratia marcescens
A0A1Q5WBV8	Serratia marcescens	A0A1Q5WBV8	Serratia marcescens
A0A1Q5WBV8	Serratia marcescens	A0A221DPX0	Serratia marcescens
A0A1Q5WBV8	Serratia marcescens	A0A221FPA3	Serratia marcescens
A0A1Q5WBV8	Serratia marcescens	A0A240C044	Serratia ficaria
A0A1Q5WBV8	Serratia marcescens	A0A2G7ZRG9	Serratia sp. OLAL2
A0A1Q5WBV8	Serratia marcescens	A0A2K2IWH8	Serratia marcescens
A0A1Q5WBV8	Serratia marcescens	A0A2K9YV94	Serratia liquefaciens
A0A1Q5WBV8	Serratia marcescens	A0A2R3H7V9	Serratia sp. MYb239
A0A1Q5WBV8	Serratia marcescens	A0A2S4XCF7	Serratia marcescens
A0A1Q5WBV8	Serratia marcescens	A0A2U9FLI6	Serratia marcescens
A0A1Q5WBV8	Serratia marcescens	A0A2V4FVK7	Serratia marcescens
A0A1Q5WBV8	Serratia marcescens	A0A2V4GCB8	Serratia marcescens
A0A1Q5WBV8	Serratia marcescens	A0A2X2GDD0	Serratia quinivorans
A0A1Q5WBV8	Serratia marcescens	A0A2X2KPI7	Serratia marcescens
A0A1Q5WBV8	Serratia marcescens	A0A347PID4
A0A1Q5WBV8	Serratia marcescens	A0A379Z8I7
A0A1Q5WBV8	Serratia marcescens	A0A380B459
A0A1Q5WBV8	Serratia marcescens	A0A380CEQ7
A0A1Q5WBV8	Serratia marcescens	A8GE83	Serratia proteamaculans 568
A0A1Q5WBV8	Serratia marcescens	L0MCC2	Serratia sp. FGI94
A0A1Q5ZZ46	Mucilaginibacter polytrichastri	A0A1Q5ZZ46	Mucilaginibacter polytrichastri
A0A1Q7B5C2	Nitrospirae bacterium 13_2_20CM_2_61_4	A0A1Q7B5C2	Nitrospirae bacterium 13_2_20CM_2_61_4
A0A1Q7BM13	Alphaproteobacteria bacterium 13_2_20CM_2_64_7	A0A1Q7BM13	Alphaproteobacteria bacterium 13_2_20CM_2_64_7
A0A1Q7BMU8	Alphaproteobacteria bacterium 13_2_20CM_2_64_7	A0A1Q7BMU8	Alphaproteobacteria bacterium 13_2_20CM_2_64_7
A0A1Q7FTT2	Armatimonadetes bacterium 13_1_40CM_64_14	A0A1Q7FTT2	Armatimonadetes bacterium 13_1_40CM_64_14
A0A1Q8H4C7	Bacillus licheniformis	A0A0D7XHW3	Bacillus amyloliquefaciens
A0A1Q8H4C7	Bacillus licheniformis	A0A0J6GZ16	Bacillus glycinifermentans
A0A1Q8H4C7	Bacillus licheniformis	A0A1C3SJA3	Bacillus glycinifermentans
A0A1Q8H4C7	Bacillus licheniformis	A0A1Q8H4C7	Bacillus licheniformis
A0A1Q8H4C7	Bacillus licheniformis	A0A1R1QCQ5	Bacillus swezeyi
A0A1Q8H4C7	Bacillus licheniformis	A0A1R1RV30	Bacillus haynesii
A0A1Q8H4C7	Bacillus licheniformis	A0A1Y0XNG6	Bacillus licheniformis
A0A1Q8H4C7	Bacillus licheniformis	A0A2X1A019	Bacillus licheniformis
A0A1Q8H4C7	Bacillus licheniformis	M5P172	Bacillus sonorensis L12
A0A1Q8H4C7	Bacillus licheniformis	Q65EW1	Bacillus licheniformis DSM 13 = ATCC 14580
A0A1Q8H4C7	Bacillus licheniformis	W7RYG2	Bacillus licheniformis S 16
A0A1Q8RV75	Colletotrichum chlorophyti	A0A1Q8RV75	Colletotrichum chlorophyti
A0A1Q9A360	Rhizobium taibaishanense	A0A1Q9A360	Rhizobium taibaishanense
A0A1Q9A360	Rhizobium taibaishanense	A0A353G004
A0A1R0XTG2	Paenibacillus odorifer	A0A1R0X632	Paenibacillus odorifer
A0A1R0XTG2	Paenibacillus odorifer	A0A1R0X7X3	Paenibacillus odorifer
A0A1R0XTG2	Paenibacillus odorifer	A0A1R0XTG2	Paenibacillus odorifer
A0A1R0XTG2	Paenibacillus odorifer	A0A1R0YVG9	Paenibacillus odorifer
A0A1R0XTG2	Paenibacillus odorifer	A0A1R0ZDQ8	Paenibacillus odorifer
A0A1R0XTG2	Paenibacillus odorifer	A0A264DPY4	Paenibacillus sp. VTT E-133280
A0A1R0XTG2	Paenibacillus odorifer	A0A264E4S1	Paenibacillus odorifer
A0A1R0XTG2	Paenibacillus odorifer	A0A2Z2KXS0
A0A1R1A3R1	Paenibacillus sp. FSL A5-0031	A0A0Q9KEZ2	Paenibacillus sp. Soil522
A0A1R1A3R1	Paenibacillus sp. FSL A5-0031	A0A1B8WK86	Bacillus sp. FJAT-26390
A0A1R1A3R1	Paenibacillus sp. FSL A5-0031	A0A1R1A3R1	Paenibacillus sp. FSL A5-0031
A0A1R1A3R1	Paenibacillus sp. FSL A5-0031	A0A2V4XF40	Paenibacillus sp. OV191
A0A1R1AXQ8	Paenibacillus lautus	A0A163F5G7	Paenibacillus glucanolyticus
A0A1R1AXQ8	Paenibacillus lautus	A0A1H7LKR1	Paenibacillus sp. cl141a
A0A1R1AXQ8	Paenibacillus lautus	A0A1R1AXQ8	Paenibacillus lautus
A0A1R1AXQ8	Paenibacillus lautus	A0A1S2EXX9	Paenibacillus sp. LC231
A0A1R1AXQ8	Paenibacillus lautus	A0A2A5LDE5	Paenibacillus lautus
A0A1R1AXQ8	Paenibacillus lautus	A0A2M9N4Q9	Paenibacillus sp. GM2FR
A0A1R1AXQ8	Paenibacillus lautus	A0A2R9SPE7	Paenibacillus vortex V453
A0A1R1AXQ8	Paenibacillus lautus	A0A328WF06
A0A1R1AXQ8	Paenibacillus lautus	D3EB70	Paenibacillus sp. Y412MC10
A0A1R1AXQ8	Paenibacillus lautus	F3MDM5	Paenibacillus sp. HGF5
A0A1R1AXQ8	Paenibacillus lautus	V9GJP1	Paenibacillus sp. JCM 10914
A0A1R1AXQ8	Paenibacillus lautus	W4AXB8	Paenibacillus sp. FSL R5-808
A0A1R1CDH3	Paenibacillus sp. FSL H7-0331	A0A1H4MLT2	Paenibacillus sp. GP183
A0A1R1CDH3	Paenibacillus sp. FSL H7-0331	A0A1I4IHA8	Paenibacillus sp. 1_12
A0A1R1CDH3	Paenibacillus sp. FSL H7-0331	A0A1R1CDH3	Paenibacillus sp. FSL H7-0331
A0A1R1CDH3	Paenibacillus sp. FSL H7-0331	A0A229P397	Paenibacillus herberti
A0A1R1CH58	Paenibacillus sp. FSL H8-0548	A0A1R1CH58	Paenibacillus sp. FSL H8-0548
A0A1R1CMG6	Paenibacillus sp. FSL H8-0259	A0A089I8L3	Paenibacillus sp. FSL H7-0357
A0A1R1CMG6	Paenibacillus sp. FSL H8-0259	A0A089L2H2	Paenibacillus sp. FSL R7-0331
A0A1R1CMG6	Paenibacillus sp. FSL H8-0259	A0A089LY48	Paenibacillus sp. FSL R7-0273
A0A1R1CMG6	Paenibacillus sp. FSL H8-0259	A0A089MHY2	Paenibacillus graminis
A0A1R1CMG6	Paenibacillus sp. FSL H8-0259	A0A0E3WJ90	Paenibacillus riograndensis SBR5
A0A1R1CMG6	Paenibacillus sp. FSL H8-0259	A0A101XWY9	Paenibacillus sp. DMB5
A0A1R1CMG6	Paenibacillus sp. FSL H8-0259	A0A132UBQ6	Paenibacillus riograndensis
A0A1R1CMG6	Paenibacillus sp. FSL H8-0259	A0A1G8QT24	Paenibacillus typhae
A0A1R1CMG6	Paenibacillus sp. FSL H8-0259	A0A1G9W0V3	Paenibacillus jilunlii
A0A1R1CMG6	Paenibacillus sp. FSL H8-0259	A0A1Q5WRZ5	Paenibacillus sp. P3E
A0A1R1CMG6	Paenibacillus sp. FSL H8-0259	A0A1Q5XWS0	Paenibacillus sp. P46E
A0A1R1CMG6	Paenibacillus sp. FSL H8-0259	A0A1R0XVQ4	Paenibacillus borealis
A0A1R1CMG6	Paenibacillus sp. FSL H8-0259	A0A1R1CMG6	Paenibacillus sp. FSL H8-0259
A0A1R1CMG6	Paenibacillus sp. FSL H8-0259	A0A1R1G2N0	Paenibacillus sp. FSL R7-0333
A0A1R1CMG6	Paenibacillus sp. FSL H8-0259	A0A1R1G4F2	Paenibacillus sp. FSL R7-0337
A0A1R1CMG6	Paenibacillus sp. FSL H8-0259	W4C389	Paenibacillus sp. FSL R7-269
A0A1R1CMG6	Paenibacillus sp. FSL H8-0259	W4D2K1	Paenibacillus sp. FSL R7-277
A0A1R1EMC8	Paenibacillus rhizosphaerae	A0A1R1EMC8	Paenibacillus rhizosphaerae
A0A1R1EMC8	Paenibacillus rhizosphaerae	A0A259T6S7	Paenibacillus sp. XY044
A0A1R1EMC8	Paenibacillus rhizosphaerae	A0A2S8PEG9	Paenibacillus sp. AR247
A0A1S2HMB0	Curtobacterium sp. MCBA15_008	A0A1S2HMB0	Curtobacterium sp. MCBA15_008
A0A1S2HMB0	Curtobacterium sp. MCBA15_008	A0A2W4XWI6	Leifsonia xyli
A0A1S7QD09	Agrobacterium genomosp. 7 str. RV3	A0A098RK87	Rhizobium sp. H41
A0A1S7QD09	Agrobacterium genomosp. 7 str. RV3	A0A0X8IUE8	Agrobacterium tumefaciens
A0A1S7QD09	Agrobacterium genomosp. 7 str. RV3	A0A176WVK9	Agrobacterium tumefaciens
A0A1S7QD09	Agrobacterium genomosp. 7 str. RV3	A0A1B9SSE1	Agrobacterium tumefaciens
A0A1S7QD09	Agrobacterium genomosp. 7 str. RV3	A0A1G5ISW1	Rhizobium sp. NFACC06-2
A0A1S7QD09	Agrobacterium genomosp. 7 str. RV3	A0A1G8YF67	Rhizobium sp. PDC82
A0A1S7QD09	Agrobacterium genomosp. 7 str. RV3	A0A1S7MUP2	Agrobacterium genomosp. 2 str. CFBP 5494
A0A1S7QD09	Agrobacterium genomosp. 7 str. RV3	A0A1S7QD09	Agrobacterium genomosp. 7 str. RV3
A0A1S7QD09	Agrobacterium genomosp. 7 str. RV3	A0A1S7QEL9	Agrobacterium fabrum str. J-07
A0A1S7QD09	Agrobacterium genomosp. 7 str. RV3	A0A1S7QZB4	Agrobacterium tumefaciens str. Kerr 14
A0A1S7QD09	Agrobacterium genomosp. 7 str. RV3	A0A1S7RDH5	Agrobacterium tumefaciens str. CFBP 5621
A0A1S7QD09	Agrobacterium genomosp. 7 str. RV3	A0A1S7RSZ1	Agrobacterium genomosp. 7 str. Zutra 3/1
A0A1S7QD09	Agrobacterium genomosp. 7 str. RV3	A0A1S7S8Q4	Agrobacterium genomosp. 6 str. NCPPB 925
A0A1S7QD09	Agrobacterium genomosp. 7 str. RV3	A0A1S7UDV6	Agrobacterium genomosp. 9 str. Hayward 0363
A0A1S7QD09	Agrobacterium genomosp. 7 str. RV3	A0A1S9E4G4	Rhizobium pusense
A0A1S7QD09	Agrobacterium genomosp. 7 str. RV3	A0A328F801
A0A1S7QD09	Agrobacterium genomosp. 7 str. RV3	A0A329Y293
A0A1S7QD09	Agrobacterium genomosp. 7 str. RV3	A0A349Y0X1
A0A1S7QD09	Agrobacterium genomosp. 7 str. RV3	A9CH43	Agrobacterium fabrum str. C58
A0A1S7QD09	Agrobacterium genomosp. 7 str. RV3	F5J8C5	Agrobacterium sp. ATCC 31749
A0A1S8B7G1	Diplodia seriata	A0A1S8B7G1	Diplodia seriata
A0A1S9RF62	Penicillium brasilianum	A0A0F7TRM8	Penicillium brasilianum
A0A1S9RF62	Penicillium brasilianum	A0A1S9RF62	Penicillium brasilianum
A0A1T2X5N0	Paenibacillus selenitireducens	A0A1T2X5N0	Paenibacillus selenitireducens
A0A1T2X5N0	Paenibacillus selenitireducens	A0A1V4HHQ0	Paenibacillus ferrarius
A0A1T3CIB9	Trichoderma guizhouense	A0A024SEW7	Trichoderma reesei RUT C-30
A0A1T3CIB9	Trichoderma guizhouense	A0A0F9XMG0	Trichoderma harzianum
A0A1T3CIB9	Trichoderma guizhouense	A0A1T3CIB9	Trichoderma guizhouense
A0A1T3CIB9	Trichoderma guizhouense	A0A223FPM6	Trichoderma afroharzianum
A0A1T3CIB9	Trichoderma guizhouense	A0A2H2Z2P8	Trichoderma parareesei
A0A1T3CIB9	Trichoderma guizhouense	A0A2K0SZ30	Trichoderma gamsii
A0A1T3CIB9	Trichoderma guizhouense	A0A2K0TYE4	Trichoderma harzianum
A0A1T3CIB9	Trichoderma guizhouense	A0A2N1LNF4	Trichoderma harzianum
A0A1T3CIB9	Trichoderma guizhouense	A0A2P4ZEC7	Trichoderma gamsii
A0A1T3CIB9	Trichoderma guizhouense	A0A2T3YZN4	Trichoderma asperellum CBS 433.97
A0A1T3CIB9	Trichoderma guizhouense	A0A2T4B6Q4	Trichoderma citrinoviride
A0A1T3CIB9	Trichoderma guizhouense	G9MYA2	Trichoderma virens Gv29-8
A0A1T3CIB9	Trichoderma guizhouense	G9NRV6	Trichoderma atroviride IMI 206040
A0A1T3CNM7	Trichoderma guizhouense	A0A0G0ATQ4	Trichoderma harzianum
A0A1T3CNM7	Trichoderma guizhouense	A0A1T3CNM7	Trichoderma guizhouense
A0A1T3CNM7	Trichoderma guizhouense	A0A2H2YXX8	Trichoderma parareesei
A0A1T3CNM7	Trichoderma guizhouense	A0A2K0UA72	Trichoderma harzianum
A0A1T3CNM7	Trichoderma guizhouense	A0A2N1LU08	Trichoderma harzianum
A0A1T3CNM7	Trichoderma guizhouense	A0A2T3ZFV8	Trichoderma asperellum CBS 433.97
A0A1T3CNM7	Trichoderma guizhouense	A0A2T4AJB0	Trichoderma harzianum CBS 226.95
A0A1T3CNM7	Trichoderma guizhouense	A0A2T4BEM1	Trichoderma citrinoviride
A0A1T3CNM7	Trichoderma guizhouense	A0A2T4BPA1	Trichoderma longibrachiatum ATCC 18648
A0A1T3CNM7	Trichoderma guizhouense	G0R915	Trichoderma reesei QM6a
A0A1T3CNM7	Trichoderma guizhouense	G9MLE4	Trichoderma virens Gv29-8
A0A1T5EI16	Lysinibacillus sp. AC-3	A0A0A3J7Z3	Lysinibacillus boronitolerans JCM 21713 = 10a = NB
A0A1T5EI16	Lysinibacillus sp. AC-3	A0A0B1XUA4	Lysinibacillus sp. A1
A0A1T5EI16	Lysinibacillus sp. AC-3	A0A0K9FBY6	Lysinibacillus xylanilyticus
A0A1T5EI16	Lysinibacillus sp. AC-3	A0A0M0W9P8	Lysinibacillus sp. FJAT-14745
A0A1T5EI16	Lysinibacillus sp. AC-3	A0A0N0S1T4	Lysinibacillus sp. FJAT-14222
A0A1T5EI16	Lysinibacillus sp. AC-3	A0A0P7L0S0	Lysinibacillus sp. ZYM-1
A0A1T5EI16	Lysinibacillus sp. AC-3	A0A1E4R7U1	Lysinibacillus fusiformis
A0A1T5EI16	Lysinibacillus sp. AC-3	A0A1T5EI16	Lysinibacillus sp. AC-3
A0A1T5EI16	Lysinibacillus sp. AC-3	A0A2A4D7X6	Lysinibacillus fusiformis
A0A1T5EI16	Lysinibacillus sp. AC-3	A0A2I0UZR7	Lysinibacillus fusiformis
A0A1T5EI16	Lysinibacillus sp. AC-3	A0A2I7Z3V5	Lysinibacillus sp. YS11
A0A1T5EI16	Lysinibacillus sp. AC-3	A0A2M9Q456	Lysinibacillus xylanilyticus
A0A1T5EI16	Lysinibacillus sp. AC-3	A0A349UI69
A0A1T5EI16	Lysinibacillus sp. AC-3	A0A354LK82
A0A1T5EI16	Lysinibacillus sp. AC-3	A3IBX7	Bacillus sp. B14905
A0A1T5EI16	Lysinibacillus sp. AC-3	B1HPB2	Lysinibacillus sphaericus C3-41
A0A1T5EI16	Lysinibacillus sp. AC-3	D7WRP6	Lysinibacillus fusiformis ZC1
A0A1T5EI16	Lysinibacillus sp. AC-3	R7ZE37	Lysinibacillus sphaericus OT4b.31
A0A1T5EI16	Lysinibacillus sp. AC-3	W7S2W4	Lysinibacillus sphaericus CBAM5
A0A1T5I9B8	Plantibacter cousiniae	A0A0M2H6Y0	Microbacterium trichothecenolyticum
A0A1T5I9B8	Plantibacter cousiniae	A0A0Q5E5N0	Plantibacter sp. Leaf314
A0A1T5I9B8	Plantibacter cousiniae	A0A134DGG3	Microbacterium hominis
A0A1T5I9B8	Plantibacter cousiniae	A0A1H3TSB4	Herbiconiux ginsengi
A0A1T5I9B8	Plantibacter cousiniae	A0A1T5I9B8	Plantibacter cousiniae
A0A1T5I9B8	Plantibacter cousiniae	A0A1X9LTK6	Cnuibacter physcomitrellae
A0A1T5I9B8	Plantibacter cousiniae	A0A1Y6EC45	Plantibacter elymi
A0A1T5I9B8	Plantibacter cousiniae	A0A2K9DPD6	Microbacterium hominis
A0A1U7CYL2	Paludisphaera borealis	A0A1U7CYL2	Paludisphaera borealis
A0A1U7GMY1	Planctomycetales bacterium 71-10	A0A142YLF6	Planctomyces sp. SH-PL62
A0A1U7GMY1	Planctomycetales bacterium 71-10	A0A1U7GMY1	Planctomycetales bacterium 71-10
A0A1U7PSE9	Edaphobacillus lindanitolerans	A0A1U7PSE9	Edaphobacillus lindanitolerans
A0A1U8QQB5	Aspergillus nidulans FGSC A4	A0A1U8QQB5	Aspergillus nidulans FGSC A4
A0A1U9KX18	Gluconobacter albidus	A0A149TJL1	Gluconobacter albidus
A0A1U9KX18	Gluconobacter albidus	A0A1U9KX18	Gluconobacter albidus
A0A1U9KX18	Gluconobacter albidus	A0A1Y3FYE3	Acetobacter sp. DmW_043
A0A1V1TDK1	fungal sp. No.14919	A0A1V1TDK1	fungal sp. No.14919
A0A1V1TDK1	fungal sp. No.14919	A0A1W2TQ75	Rosellinia necatrix
A0A1V1TVG9	fungal sp. No.14919	A0A1V1TVG9	fungal sp. No.14919
A0A1V1TVG9	fungal sp. No.14919	A0A1W2TTN9	Rosellinia necatrix
A0A1V1TVG9	fungal sp. No.14919	A0A1Y2V1Y7	Hypoxylon sp. CO27-5
A0A1V2AWB2	[Flexibacter] sp. ATCC 35208	A0A1V2AWB2	[Flexibacter] sp. ATCC 35208
A0A1V3GDP1	Fictibacillus arsenicus	A0A1V3GDP1	Fictibacillus arsenicus
A0A1V3YUT9	Ochrobactrum sp. P6BS-III	A0A1V3YUT9	Ochrobactrum sp. P6BS-III
A0A1V6P138	Penicillium decumbens	A0A1V6P138	Penicillium decumbens
A0A1V6QJ01	Penicillium antarcticum	A0A1F5LCJ0	Penicillium arizonense
A0A1V6QJ01	Penicillium antarcticum	A0A1V6QJ01	Penicillium antarcticum
A0A1V6RGU8	Penicillium vulpinum	A0A0A2I8B9	Penicillium expansum
A0A1V6RGU8	Penicillium vulpinum	A0A0G4PPW3	Penicillium camemberti FM 013
A0A1V6RGU8	Penicillium vulpinum	A0A0M8NZ21	Penicillium nordicum
A0A1V6RGU8	Penicillium vulpinum	A0A101MPH2	Penicillium freii
A0A1V6RGU8	Penicillium vulpinum	A0A135LUY6	Penicillium griseofulvum
A0A1V6RGU8	Penicillium vulpinum	A0A1F5LQW3	Penicillium arizonense
A0A1V6RGU8	Penicillium vulpinum	A0A1L9V9R7	Aspergillus glaucus CBS 516.65
A0A1V6RGU8	Penicillium vulpinum	A0A1V6RGU8	Penicillium vulpinum
A0A1V6RGU8	Penicillium vulpinum	A0A1V6TAW1	Penicillium flavigenum
A0A1V6RGU8	Penicillium vulpinum	A0A1V6V1J9	Penicillium coprophilum
A0A1V6RGU8	Penicillium vulpinum	W6QB31	Penicillium roqueforti FM164
A0A1V6TFM0	Penicillium steckii	A0A1V6TFM0	Penicillium steckii
A0A1V6TJT3	Penicillium steckii	A0A1V6TJT3	Penicillium steckii
A0A1V6YVR2	Penicillium nalgiovense	A0A1V6YVR2	Penicillium nalgiovense
A0A1V8SCE2	Rachicladosporium antarcticum	A0A1V8SCE2	Rachicladosporium antarcticum
A0A1V8SCE2	Rachicladosporium antarcticum	A0A1V8TW75	Rachicladosporium sp. CCFEE 5018
A0A1V8TRV4	Rachicladosporium antarcticum	A0A1V8TRV4	Rachicladosporium antarcticum
A0A1V8TRV4	Rachicladosporium antarcticum	A0A1V8TVD1	Rachicladosporium antarcticum
A0A1V8TRV4	Rachicladosporium antarcticum	A0A1V8U4L8	Rachicladosporium sp. CCFEE 5018
A0A1V8TRV4	Rachicladosporium antarcticum	A0A1V8UVK5	Rachicladosporium sp. CCFEE 5018
A0A1V8UFS5	Rachicladosporium sp. CCFEE 5018	A0A1V8T3R5	Rachicladosporium antarcticum
A0A1V8UFS5	Rachicladosporium sp. CCFEE 5018	A0A1V8UFS5	Rachicladosporium sp. CCFEE 5018
A0A1V9I5S1	Clostridium sporogenes	A0A0C3ME43	Clostridium botulinum
A0A1V9I5S1	Clostridium sporogenes	A0A0E1KS01	Clostridium botulinum CDC_1436
A0A1V9I5S1	Clostridium sporogenes	A0A175M2V2	Clostridium botulinum B2 433
A0A1V9I5S1	Clostridium sporogenes	A0A1V9I5S1	Clostridium sporogenes
A0A1V9I5S1	Clostridium sporogenes	A0A2G7HM43	Clostridium combesii
A0A1V9I5S1	Clostridium sporogenes	A0A2I4MSC6	Clostridium botulinum
A0A1V9I5S1	Clostridium sporogenes	A0A2I4N586	Clostridium botulinum
A0A1V9I5S1	Clostridium sporogenes	A0A2I4NDQ9	Clostridium botulinum
A0A1V9I5S1	Clostridium sporogenes	A0A2I4P2I5	Clostridium botulinum
A0A1V9I5S1	Clostridium sporogenes	A0A2K9MN10	Clostridium botulinum
A0A1V9I5S1	Clostridium sporogenes	A0A2P1TU20	Clostridium botulinum
A0A1V9I5S1	Clostridium sporogenes	A5I056	Clostridium botulinum A str. Hall
A0A1V9I5S1	Clostridium sporogenes	A7GBQ1	Clostridium botulinum F str. Langeland
A0A1V9I5S1	Clostridium sporogenes	B1IH64	Clostridium botulinum B1 str. Okra
A0A1V9I5S1	Clostridium sporogenes	B1KXI2	Clostridium botulinum A3 str. Loch Maree
A0A1W2TMB4	Rosellinia necatrix	A0A1V1THV5	fungal sp. No.14919
A0A1W2TMB4	Rosellinia necatrix	A0A1W2TMB4	Rosellinia necatrix
A0A1W6A4L6	Bacillus mycoides	A0A1I6WDG6	Bacillus sp. 103mf
A0A1W6A4L6	Bacillus mycoides	A0A1W6A4L6	Bacillus mycoides
A0A1W6A4L6	Bacillus mycoides	A0A2B0HKL1	Bacillus cereus
A0A1W6A4L6	Bacillus mycoides	A0A2B0XEF8	Bacillus cereus
A0A1W6A4L6	Bacillus mycoides	A0A2B2DI98	Bacillus megaterium
A0A1W6A4L6	Bacillus mycoides	A0A2B6GVB5	Bacillus wiedmannii
A0A1W6A4L6	Bacillus mycoides	A0A2C1RVW3	Bacillus cereus
A0A1W6A4L6	Bacillus mycoides	A0A2C3UF83	Bacillus pseudomycoides
A0A1W6A4L6	Bacillus mycoides	A0A2C5A4G4	Bacillus toyonensis
A0A1W6MTU4	Methylocystis bryophila	A0A1W6MTU4	Methylocystis bryophila
A0A1W6N009	Methylocystis bryophila	A0A1W6N009	Methylocystis bryophila
A0A1W6N1X8	Methylocystis bryophila	A0A177P0X1	Methylosinus sp. R-45379
A0A1W6N1X8	Methylocystis bryophila	A0A1W6N1X8	Methylocystis bryophila
A0A1W6N1X8	Methylocystis bryophila	A0A248JUL0	Nitrospirillum amazonense CBAmc
A0A1W6N1X8	Methylocystis bryophila	G1XYI4	Nitrospirillum amazonense Y2
A0A1W6ZT67	Pseudorhodoplanes sinuspersici	A0A1W6ZT67	Pseudorhodoplanes sinuspersici
A0A1W7A0G7	Pseudorhodoplanes sinuspersici	A0A1W7A0G7	Pseudorhodoplanes sinuspersici
A0A1X1D7Z9	Pantoea deleyi	A0A059IAI5	Pantoea agglomerans Eh318
A0A1X1D7Z9	Pantoea deleyi	A0A0A2W5Q0	Beauveria bassiana D1-5
A0A1X1D7Z9	Pantoea deleyi	A0A0D5WXW0	Klebsiella michiganensis
A0A1X1D7Z9	Pantoea deleyi	A0A0J5LM70	Pluralibacter gergoviae
A0A1X1D7Z9	Pantoea deleyi	A0A1S2B4I1	Pluralibacter gergoviae
A0A1X1D7Z9	Pantoea deleyi	A0A1X1D7Z9	Pantoea deleyi
A0A1X1D7Z9	Pantoea deleyi	A0A1X7HW53	Cedecea sp. NFIX57
A0A1X1D7Z9	Pantoea deleyi	A0A1Y4YE96	Pluralibacter gergoviae
A0A1X1D7Z9	Pantoea deleyi	A0A251ZIN5	Pluralibacter gergoviae
A0A1X1D7Z9	Pantoea deleyi	A0A291DUZ2	Cedecea neteri
A0A1X1D7Z9	Pantoea deleyi	A0A2C5WLR3	Pluralibacter gergoviae
A0A1X1D7Z9	Pantoea deleyi	A0A2V1YSM9	Pantoea allii
A0A1X1D7Z9	Pantoea deleyi	A0A2W4B423	Pantoea sp. ARC607
A0A1X1D7Z9	Pantoea deleyi	A0A379CXD8
A0A1X1D7Z9	Pantoea deleyi	A0A379LT86
A0A1X1D7Z9	Pantoea deleyi	B2VFK6	Erwinia tasmaniensis Et1/99
A0A1X1D7Z9	Pantoea deleyi	D6YQ42	Pantoea vagans C9-1
A0A1X1D7Z9	Pantoea deleyi	J1GBI5	Enterobacter sp. Ag1
A0A1X1D7Z9	Pantoea deleyi	V5Z9L2	Erwinia piriflorinigrans CFBP 5888
A0A1X4ITN1	Pseudoruegeria sp. SK021	A0A1X4ITN1	Pseudoruegeria sp. SK021
A0A1X4ITN1	Pseudoruegeria sp. SK021	A0A2W5NEZ6	Rhodovulum sulfidophilum
A0A1X6MRL8	Postia placenta MAD-698-R-SB12	A0A1X6MRL8	Postia placenta MAD-698-R-SB12
A0A1X6MS52	Postia placenta MAD-698-R-SB12	A0A1X6MS52	Postia placenta MAD-698-R-SB12
A0A1X6MWI7	Postia placenta MAD-698-R-SB12	A0A1X6MWI7	Postia placenta MAD-698-R-SB12
A0A1X6MYI1	Postia placenta MAD-698-R-SB12	A0A1X6MYI1	Postia placenta MAD-698-R-SB12
A0A1X6MYK9	Postia placenta MAD-698-R-SB12	A0A1X6MYK9	Postia placenta MAD-698-R-SB12
A0A1X7DT35	Cellulosimicrobium cellulans J1	A0A1X7DT35	Cellulosimicrobium cellulans J1
A0A1X7RRF4	Zymoseptoria tritici ST99CH_3D7	A0A0F4GU83	Zymoseptoria brevis
A0A1X7RRF4	Zymoseptoria tritici ST99CH_3D7	A0A1X7RRF4	Zymoseptoria tritici ST99CH_3D7
A0A1X7RRF4	Zymoseptoria tritici ST99CH_3D7	A0A1Y6LGK4	Zymoseptoria tritici ST99CH_1A5
A0A1X7RRF4	Zymoseptoria tritici ST99CH_3D7	F9X8G8	Zymoseptoria tritici IPO323
A0A1X7RTP1	Zymoseptoria tritici ST99CH_3D7	A0A0F4G3X9	Zymoseptoria brevis
A0A1X7RTP1	Zymoseptoria tritici ST99CH_3D7	A0A1X7RTP1	Zymoseptoria tritici ST99CH_3D7
A0A1X7RTP1	Zymoseptoria tritici ST99CH_3D7	A0A1Y6LHQ6	Zymoseptoria tritici ST99CH_1A5
A0A1X7RTP1	Zymoseptoria tritici ST99CH_3D7	A0A2H1GCR0	Zymoseptoria tritici ST99CH_1E4
A0A1X7RTP1	Zymoseptoria tritici ST99CH_3D7	F9X967	Zymoseptoria tritici IPO323
A0A1X7RV89	Zymoseptoria tritici ST99CH_3D7	A0A0F4GA31	Zymoseptoria brevis
A0A1X7RV89	Zymoseptoria tritici ST99CH_3D7	A0A1X7RV89	Zymoseptoria tritici ST99CH_3D7
A0A1X7RV89	Zymoseptoria tritici ST99CH_3D7	A0A1Y6LNB4	Zymoseptoria tritici ST99CH_1A5
A0A1X7RV89	Zymoseptoria tritici ST99CH_3D7	A0A2H1GI31	Zymoseptoria tritici ST99CH_1E4
A0A1X7RV89	Zymoseptoria tritici ST99CH_3D7	F9XB44	Zymoseptoria tritici IPO323
A0A1X7S8B5	Zymoseptoria tritici ST99CH_3D7	A0A0F4GM63	Zymoseptoria brevis
A0A1X7S8B5	Zymoseptoria tritici ST99CH_3D7	A0A1X7S8B5	Zymoseptoria tritici ST99CH_3D7
A0A1X7S8B5	Zymoseptoria tritici ST99CH_3D7	A0A1Y6LXQ1	Zymoseptoria tritici ST99CH_1A5
A0A1X7S8B5	Zymoseptoria tritici ST99CH_3D7	A0A2H1H4D7	Zymoseptoria tritici ST99CH_1E4
A0A1Y1Y0Y1	Clohesyomyces aquaticus	A0A1Y1Y0Y1	Clohesyomyces aquaticus
A0A1Y1Z033	Clohesyomyces aquaticus	A0A1Y1Z033	Clohesyomyces aquaticus
A0A1Y1ZA56	Clohesyomyces aquaticus	A0A1Y1ZA56	Clohesyomyces aquaticus
A0A1Y2DQ50	Pseudomassariella vexata	A0A1Y2DQ50	Pseudomassariella vexata
A0A1Y2E2J3	Pseudomassariella vexata	A0A0C3H2M1	Oidiodendron maius Zn
A0A1Y2E2J3	Pseudomassariella vexata	A0A1Y2E2J3	Pseudomassariella vexata
A0A1Y2E2J3	Pseudomassariella vexata	A0A2J6S174	Meliniomyces variabilis F
A0A1Y2E2J3	Pseudomassariella vexata	A0A2V1CTB8	Cadophora sp. DSE1049
A0A1Y2IFH1	Trametes coccinea BRFM310	A0A1Y2IFH1	Trametes coccinea BRFM310
A0A1Y2IL96	Trametes coccinea BRFM310	A0A1Y2IL96	Trametes coccinea BRFM310
A0A1Y2IZB5	Trametes coccinea BRFM310	A0A060SLB1	Trametes cinnabarina
A0A1Y2IZB5	Trametes coccinea BRFM310	A0A1Y2IZB5	Trametes coccinea BRFM310
A0A1Y2IZD6	Trametes coccinea BRFM310	A0A1M2V721	Trametes pubescens
A0A1Y2IZD6	Trametes coccinea BRFM310	A0A1Y2IZD6	Trametes coccinea BRFM310
A0A1Y2JJE0	Bradyrhizobium japonicum	A0A1Y2JJE0	Bradyrhizobium japonicum
A0A1Y2LVW4	Epicoccum nigrum	A0A163ASM6	Ascochyta rabiei
A0A1Y2LVW4	Epicoccum nigrum	A0A1Y2LVW4	Epicoccum nigrum
A0A1Y2TSZ2	Hypoxylon sp. EC38	A0A0X9H1Q7	Daldinia eschscholzii IFB-TL01
A0A1Y2TSZ2	Hypoxylon sp. EC38	A0A1Y2TSZ2	Hypoxylon sp. EC38
A0A1Y2TSZ2	Hypoxylon sp. EC38	A0A1Y2VCC3	Hypoxylon sp. CO27-5
A0A1Y2TSZ2	Hypoxylon sp. EC38	A0A1Y2WI07	Hypoxylon sp. CI-4A
A0A1Y2TSZ2	Hypoxylon sp. EC38	A0A1Y2WM68	Daldinia sp. EC12
A0A1Y2USA3	Hypoxylon sp. CO27-5	A0A0X9GIP0	Daldinia eschscholzii IFB-TL01
A0A1Y2USA3	Hypoxylon sp. CO27-5	A0A1Y2TXR0	Hypoxylon sp. EC38
A0A1Y2USA3	Hypoxylon sp. CO27-5	A0A1Y2USA3	Hypoxylon sp. CO27-5
A0A1Y2USA3	Hypoxylon sp. CO27-5	A0A1Y2WPE8	Daldinia sp. EC12
A0A1Y2WAI7	Hypoxylon sp. CI-4A	A0A1Y2WAI7	Hypoxylon sp. CI-4A
A0A1Y2WBV1	Hypoxylon sp. CI-4A	A0A0X9H1N0	Daldinia eschscholzii IFB-TL01
A0A1Y2WBV1	Hypoxylon sp. CI-4A	A0A1Y2WBV1	Hypoxylon sp. CI-4A
A0A1Y2WBV1	Hypoxylon sp. CI-4A	A0A1Y2XCD1	Daldinia sp. EC12
A0A1Y3PI41	Bacillus thermozeamaize	A0A0H4P520	Bacillus smithii
A0A1Y3PI41	Bacillus thermozeamaize	A0A1I3P1H9	Thermoflavimicrobium dichotomicum
A0A1Y3PI41	Bacillus thermozeamaize	A0A1Y3PI41	Bacillus thermozeamaize
A0A1Y3PI41	Bacillus thermozeamaize	A0A2A7FYR0	Bacillus pseudomycoides
A0A1Y3PI41	Bacillus thermozeamaize	A0A2A7H1R6	Bacillus sp. AFS098217
A0A1Y3PL22	Parageobacillus thermoglucosidasius	A0A0F6BM85	Geobacillus sp. Y4.1MC1
A0A1Y3PL22	Parageobacillus thermoglucosidasius	A0A150M124	Anoxybacillus flavithermus
A0A1Y3PL22	Parageobacillus thermoglucosidasius	A0A150M339	Caldibacillus debilis
A0A1Y3PL22	Parageobacillus thermoglucosidasius	A0A1B7KS17	Parageobacillus thermoglucosidasius
A0A1Y3PL22	Parageobacillus thermoglucosidasius	A0A1Q8Q1A8	Domibacillus antri
A0A1Y3PL22	Parageobacillus thermoglucosidasius	A0A1Y3PL22	Parageobacillus thermoglucosidasius
A0A1Y3PL22	Parageobacillus thermoglucosidasius	A0A327RPI9
A0A1Y3PL22	Parageobacillus thermoglucosidasius	A0A369WWM4
A0A1Y6K894	Bradyrhizobium sp. ORS 285	A0A1Y6K894	Bradyrhizobium sp. ORS 285
A0A1Y6K894	Bradyrhizobium sp. ORS 285	H0SL39	Bradyrhizobium sp. ORS 375
A0A1Z4EJM0	Mycobacterium shigaense	A0A1Z4EJM0	Mycobacterium shigaense
A0A1Z5SRB2	Hortaea werneckii EXF-2000	A0A1Z5SRB2	Hortaea werneckii EXF-2000
A0A1Z5SRB2	Hortaea werneckii EXF-2000	A0A1Z5T7P6	Hortaea werneckii EXF-2000
A0A200HS64	Enterococcus sp. 12F9_DIV0723	A0A1E5GCD1	Enterococcus ureasiticus
A0A200HS64	Enterococcus sp. 12F9_DIV0723	A0A200HS64	Enterococcus sp. 12F9_DIV0723
A0A200HS64	Enterococcus sp. 12F9_DIV0723	A0A345FN71
A0A200HS64	Enterococcus sp. 12F9_DIV0723	R2XG80	Enterococcus gilvus ATCC BAA-350
A0A200HS64	Enterococcus sp. 12F9_DIV0723	S0P3S4	Enterococcus sulfureus ATCC 49903
A0A211ZVH9	Inquilinus limosus	A0A211ZVH9	Inquilinus limosus
A0A218YTR4	Marssonina coronariae	A0A218YTR4	Marssonina coronariae
A0A218ZDM0	Marssonina coronariae	A0A218ZDM0	Marssonina coronariae
A0A220S9K2	Chryseobacterium sp. T16E-39	A0A220S9K2	Chryseobacterium sp. T16E-39
A0A223CY25	Tumebacillus algifaecis	A0A081P6G7	Paenibacillus tyrfis
A0A223CY25	Tumebacillus algifaecis	A0A223CY25	Tumebacillus algifaecis
A0A225A8L7	Talaromyces atroroseus	A0A225A8L7	Talaromyces atroroseus
A0A225AUE9	Talaromyces atroroseus	A0A225AUE9	Talaromyces atroroseus
A0A225BBC9	Talaromyces atroroseus	A0A225BBC9	Talaromyces atroroseus
A0A225DRY2	Fimbriiglobus ruber	A0A142XF03	Gemmata sp. SH-PL17
A0A225DRY2	Fimbriiglobus ruber	A0A225DRY2	Fimbriiglobus ruber
A0A229UGL3	Paenibacillus rigui	A0A229UGL3	Paenibacillus rigui
A0A229WZF0	Aspergillus fumigatus	A0A0K8LI74	Aspergillus udagawae
A0A229WZF0	Aspergillus fumigatus	A0A0S7DV10	Aspergillus lentulus
A0A229WZF0	Aspergillus fumigatus	A0A229WZF0	Aspergillus fumigatus
A0A229WZF0	Aspergillus fumigatus	A0A229XNN0	Aspergillus turcosus
A0A229WZF0	Aspergillus fumigatus	A0A229Z5Q9	Aspergillus turcosus
A0A229WZF0	Aspergillus fumigatus	A0A231M5X0	Aspergillus thermomutatus
A0A229WZF0	Aspergillus fumigatus	A0A2I1CNU3	Aspergillus novofumigatus IBT 16806
A0A229WZF0	Aspergillus fumigatus	A1DI17	Aspergillus fischeri NRRL 181
A0A229WZF0	Aspergillus fumigatus	B0XU41	Aspergillus fumigatus A1163
A0A229WZF0	Aspergillus fumigatus	Q4X060	Aspergillus fumigatus Af293
A0A229YDP6	Aspergillus turcosus	A0A229YDP6	Aspergillus turcosus
A0A235F644	Fictibacillus aquaticus	A0A235F644	Fictibacillus aquaticus
A0A239D3X7	Tardiphaga sp. OK246	A0A161R520	Tardiphaga robiniae
A0A239D3X7	Tardiphaga sp. OK246	A0A1H6NG86	Tardiphaga sp. OK245
A0A239D3X7	Tardiphaga sp. OK246	A0A239D3X7	Tardiphaga sp. OK246
A0A239D3X7	Tardiphaga sp. OK246	A0A2U0TKK7	Tardiphaga sp. OV697
A0A239D3X7	Tardiphaga sp. OK246	A0A370QI53
A0A239E7R1	Streptosporangium subroseum	A0A1G9BMQ0	Nonomuraea maritima
A0A239E7R1	Streptosporangium subroseum	A0A239E7R1	Streptosporangium subroseum
A0A248JYF4	Nitrospirillum amazonense CBAmc	A0A248JYF4	Nitrospirillum amazonense CBAmc
A0A249T2J8	Chitinophaga sp. MD30	A0A249T2J8	Chitinophaga sp. MD30
A0A252BZW7	Acetobacter sp. DsW_063	A0A252BZW7	Acetobacter sp. DsW_063
A0A254UD51	Aspergillus niger	A0A254UD51	Aspergillus niger
A0A256CHE1	Ignatzschineria sp. F8392	A0A256CHE1	Ignatzschineria sp. F8392
A0A256CHE1	Ignatzschineria sp. F8392	A0A2U2AG74	Ignatzschineria ureiclastica
A0A256G859	Ochrobactrum pseudogrignonense	A0A1A9FMJ6	Ochrobactrum pseudogrignonense
A0A256G859	Ochrobactrum pseudogrignonense	A0A256G859	Ochrobactrum pseudogrignonense
A0A257PDJ7	Rhodospirillales bacterium 20-64-7	A0A257PDJ7	Rhodospirillales bacterium 20-64-7
A0A268NYU7	Bacillus clausii	A0A268NYU7	Bacillus clausii
A0A268NYU7	Bacillus clausii	A0A268RU77	Bacillus clausii
A0A268NYU7	Bacillus clausii	A0A2X0YXJ4	Bacillus circulans
A0A269W7E8	Paenibacillus sp. 7541	A0A1L5LNI8	Paenibacillus xylanexedens
A0A269W7E8	Paenibacillus sp. 7541	A0A1R1C4L0	Paenibacillus amylolyticus
A0A269W7E8	Paenibacillus sp. 7541	A0A1R1E8Q7	Paenibacillus amylolyticus
A0A269W7E8	Paenibacillus sp. 7541	A0A1R1FQG4	Paenibacillus sp. FSL R5-0765
A0A269W7E8	Paenibacillus sp. 7541	A0A268B554	Paenibacillus sp. 7523-1
A0A269W7E8	Paenibacillus sp. 7541	A0A268SHU9	Paenibacillus sp. 7516
A0A269W7E8	Paenibacillus sp. 7541	A0A269W7E8	Paenibacillus sp. 7541
A0A269W7E8	Paenibacillus sp. 7541	A0A2G7M542	Paenibacillus sp. LK1
A0A269W7E8	Paenibacillus sp. 7541	A0A2M9MTT5	Paenibacillus sp. GM1FR
A0A269W7E8	Paenibacillus sp. 7541	A0A2N3JR57	Paenibacillus sp. BGI2013
A0A269W7E8	Paenibacillus sp. 7541	A0A2S8P273	Paenibacillus sp. PCH8
A0A269W7E8	Paenibacillus sp. 7541	A0A2S8XC29	Paenibacillus sp. MYb63
A0A269W7E8	Paenibacillus sp. 7541	A0A2V3S9Y0	Paenibacillus taichungensis
A0A269W7E8	Paenibacillus sp. 7541	A0A2V4VXE9	Paenibacillus barcinonensis
A0A269W7E8	Paenibacillus sp. 7541	A0A2W0C614	Paenibacillus illinoisensis
A0A269W7E8	Paenibacillus sp. 7541	A0A2W6Q6H9	Paenibacillus silvae
A0A269W7E8	Paenibacillus sp. 7541	A0A327QCN8
A0A269W7E8	Paenibacillus sp. 7541	W4AZ55	Paenibacillus sp. FSL R5-192
A0A284QSN7	Armillaria ostoyae	A0A284QSN7	Armillaria ostoyae
A0A284QSN7	Armillaria ostoyae	A0A2H3BAG4	Armillaria solidipes
A0A284QSN7	Armillaria ostoyae	A0A2H3EEC6	Armillaria gallica
A0A284QTA2	Armillaria ostoyae	A0A284QTA2	Armillaria ostoyae
A0A284QTA2	Armillaria ostoyae	A0A2H3B9X0	Armillaria solidipes
A0A284QTA2	Armillaria ostoyae	A0A2H3E9K4	Armillaria gallica
A0A284RPV2	Armillaria ostoyae	A0A284RPV2	Armillaria ostoyae
A0A284RPV2	Armillaria ostoyae	A0A2H3AU76	Armillaria solidipes
A0A284RPV2	Armillaria ostoyae	A0A2H3CW15	Armillaria gallica
A0A284S271	Armillaria ostoyae	A0A284S271	Armillaria ostoyae
A0A284S271	Armillaria ostoyae	A0A2H3C8Y3	Armillaria solidipes
A0A284S271	Armillaria ostoyae	A0A2H3DIV0	Armillaria gallica
A0A284S271	Armillaria ostoyae	A0A2H3DRV4	Armillaria gallica
A0A284S2C5	Armillaria ostoyae	A0A284S2C5	Armillaria ostoyae
A0A284S2C5	Armillaria ostoyae	A0A2H3C4J0	Armillaria solidipes
A0A284S2C5	Armillaria ostoyae	A0A2H3E1E1	Armillaria gallica
A0A284S4S1	Armillaria ostoyae	A0A284S4S1	Armillaria ostoyae
A0A284S4S1	Armillaria ostoyae	A0A2H3BQ34	Armillaria solidipes
A0A284S4S1	Armillaria ostoyae	A0A2H3D9P4	Armillaria gallica
A0A285KN49	Pantoea sp. GL120224-02	A0A0A3Z0U2	Enterobacter cancerogenus
A0A285KN49	Pantoea sp. GL120224-02	A0A0F3M377	Pantoea sp. BL1
A0A285KN49	Pantoea sp. GL120224-02	A0A1X1D7X6	Pantoea wallisii
A0A285KN49	Pantoea sp. GL120224-02	A0A246NGR2	Pantoea sp. VS1
A0A285KN49	Pantoea sp. GL120224-02	A0A285KN49	Pantoea sp. GL120224-02
A0A285KN49	Pantoea sp. GL120224-02	U3TVU8	Plautia stali symbiont
A0A286GU53	Spirosoma fluviale	A0A1I1LEV0	Spirosoma endophyticum
A0A286GU53	Spirosoma fluviale	A0A286GU53	Spirosoma fluviale
A0A286UA43	Phellinus noxius	A0A286UA43	Phellinus noxius
A0A286UXE5	Phellinus noxius	A0A286UXE5	Phellinus noxius
A0A291JNW0	Staphylococcus nepalensis	A0A291JNW0	Staphylococcus nepalensis
A0A291JNW0	Staphylococcus nepalensis	A0A2T4SEG1	Staphylococcus nepalensis
A0A291JNW0	Staphylococcus nepalensis	A0A380GP41
A0A2A5K1D5	Paenibacillus larvae subsp. larvae B-3650	A0A1U9YT45	Paenibacillus larvae subsp. pulvifaciens
A0A2A5K1D5	Paenibacillus larvae subsp. larvae B-3650	A0A2A5K1D5	Paenibacillus larvae subsp. larvae B-3650
A0A2A9NJD1	Amanita thiersii Skay4041	A0A2A9NJD1	Amanita thiersii Skay4041
A0A2A9PIG6	Ophiocordyceps unilateralis	A0A2A9PIG6	Ophiocordyceps unilateralis
A0A2A9PPI4	Ophiocordyceps unilateralis	A0A2A9PPI4	Ophiocordyceps unilateralis
A0A2A9PPI4	Ophiocordyceps unilateralis	A0A2C5ZC33	Ophiocordyceps camponoti-rufipedis
A0A2A9PPI4	Ophiocordyceps unilateralis	A0A367LCY8
A0A2A9PPI4	Ophiocordyceps unilateralis	A0A369GWU0
A0A2A9PPI4	Ophiocordyceps unilateralis	A0A369H6F1
A0A2B7WYB1	Helicocarpus griseus UAMH5409	A0A2B7WYB1	Helicocarpus griseus UAMH5409
A0A2B7X6Z0	Helicocarpus griseus UAMH5409	A0A2B7X6Z0	Helicocarpus griseus UAMH5409
A0A2C3KJP5	Bacillus pseudomycoides	A0A073K6I9	Bacillus gaemokensis
A0A2C3KJP5	Bacillus pseudomycoides	A0A0G8EDL1	Bacillus cereus
A0A2C3KJP5	Bacillus pseudomycoides	A0A2C3KJP5	Bacillus pseudomycoides
A0A2C5YGM6	Cordyceps sp. RAO-2017	A0A2C5YGM6	Cordyceps sp. RAO-2017
A0A2C5YI90	Ophiocordyceps australis	A0A2C5YI90	Ophiocordyceps australis
A0A2C5YI90	Ophiocordyceps australis	A0A2C5ZS13	Ophiocordyceps australis
A0A2C6AN26	Cordyceps sp. RAO-2017	A0A2C6AN26	Cordyceps sp. RAO-2017
A0A2D1IB50	Micromonospora sp. WMMA2032	A0A1A9BG59	Micromonospora sediminicola
A0A2D1IB50	Micromonospora sp. WMMA2032	A0A2D1IB50	Micromonospora sp. WMMA2032
A0A2D3UWQ0	Ramularia collo-cygni	A0A2D3UWQ0	Ramularia collo-cygni
A0A2D3UYA5	Ramularia collo-cygni	A0A2D3UYA5	Ramularia collo-cygni
A0A2G5H8H5	Cercospora beticola	A0A2G5H8H5	Cercospora beticola
A0A2G5H8H5	Cercospora beticola	M3CLN7	Sphaerulina musiva SO2202
A0A2G5HTS0	Cercospora beticola	A0A2G5HTS0	Cercospora beticola
A0A2G5HTS0	Cercospora beticola	A0A2S6CLQ5	Cercospora berteroae
A0A2G5HY55	Cercospora beticola	A0A2G5HY55	Cercospora beticola
A0A2G6XNB7	Micromonospora sp. CNZ299	A0A1C4WKK5	Micromonospora saelicesensis
A0A2G6XNB7	Micromonospora sp. CNZ299	A0A1C4XIP1	Micromonospora chokoriensis
A0A2G6XNB7	Micromonospora sp. CNZ299	A0A1C5ICF3	Micromonospora zamorensis
A0A2G6XNB7	Micromonospora sp. CNZ299	A0A2G6XNB7	Micromonospora sp. CNZ299
A0A2G6XNB7	Micromonospora sp. CNZ299	A0A2N7STJ3	Verrucosispora sp. ts21
A0A2G6XNB7	Micromonospora sp. CNZ299	A0A328MTK4
A0A2G7D1H8	Verrucosispora sp. CNZ293	A0A1H6VUF6	Xiangella phaseoli
A0A2G7D1H8	Verrucosispora sp. CNZ293	A0A2G7D1H8	Verrucosispora sp. CNZ293
A0A2G8C4P1	Tatumella sp. OPLPL6	A0A0J8YC82	bacteria symbiont BFo2 of Frankliniella occidental
A0A2G8C4P1	Tatumella sp. OPLPL6	A0A2G8C4P1	Tatumella sp. OPLPL6
A0A2G8D0D4	Erwinia sp. OLMDLW33	A0A2G8D0D4	Erwinia sp. OLMDLW33
A0A2G8D0D4	Erwinia sp. OLMDLW33	A0A354AGX6
A0A2G8D0D4	Erwinia sp. OLMDLW33	A0A357SW88
A0A2G8D0D4	Erwinia sp. OLMDLW33	A0A357U220
A0A2G8D0D4	Erwinia sp. OLMDLW33	A0A357VZG9
A0A2G8MKG5	Methylobacterium frigidaeris	A0A2G8MKG5	Methylobacterium frigidaeris
A0A2G8RWB2	Ganoderma sinense ZZ0214-1	A0A2G8RWB2	Ganoderma sinense ZZ0214-1
A0A2G8SHY2	Ganoderma sinense ZZ0214-1	A0A2G8SHY2	Ganoderma sinense ZZ0214-1
A0A2G8SHY2	Ganoderma sinense ZZ0214-1	R7SN19	Dichomitus squalens LYAD-421 SS1
A0A2G8SPF0	Ganoderma sinense ZZ0214-1	A0A2G8SPF0	Ganoderma sinense ZZ0214-1
A0A2G8SPH8	Ganoderma sinense ZZ0214-1	A0A2G8SPH8	Ganoderma sinense ZZ0214-1
A0A2H3EIV4	Diplocarpon rosae	A0A2H3EIV4	Diplocarpon rosae
A0A2H3IZU0	Wolfiporia cocos MD-104 SS10	A0A2H3IZU0	Wolfiporia cocos MD-104 SS10
A0A2H3JPA0	Wolfiporia cocos MD-104 SS10	A0A2H3JPA0	Wolfiporia cocos MD-104 SS10
A0A2H3K293	Wolfiporia cocos MD-104 SS10	A0A2H3K293	Wolfiporia cocos MD-104 SS10
A0A2H3K2B0	Wolfiporia cocos MD-104 SS10	A0A2H3K2B0	Wolfiporia cocos MD-104 SS10
A0A2H3MZK9	Bacillus sp. AFS017336	A0A2A7WN00	Bacillus sp. AFS002410
A0A2H3MZK9	Bacillus sp. AFS017336	A0A2H3MZK9	Bacillus sp. AFS017336
A0A2H3MZK9	Bacillus sp. AFS017336	A0A368WLI8
A0A2H4SHP0	Cordyceps militaris	A0A2H4SHP0	Cordyceps militaris
A0A2H4SHP0	Cordyceps militaris	G3JSF4	Cordyceps militaris CM01
A0A2H4SJX0	Cordyceps militaris	A0A2H4SJX0	Cordyceps militaris
A0A2H4SJX0	Cordyceps militaris	G3JS32	Cordyceps militaris CM01
A0A2I0S392	Cercospora zeina	A0A2G5HZ25	Cercospora beticola
A0A2I0S392	Cercospora zeina	A0A2I0S392	Cercospora zeina
A0A2I0S392	Cercospora zeina	A0A2S6CD44	Cercospora berteroae
A0A2I0S392	Cercospora zeina	N1PD35	Dothistroma septosporum NZE10
A0A2I1DHR3	Aspergillus campestris IBT 28561	A0A2I1DHR3	Aspergillus campestris IBT 28561
A0A2I1DHR3	Aspergillus campestris IBT 28561	A0A2I2F0U6	Aspergillus candidus
A0A2I1DHR3	Aspergillus campestris IBT 28561	A0A2J5HRL8	Aspergillus taichungensis
A0A2I2GDG1	Aspergillus steynii IBT 23096	A0A2I2GDG1	Aspergillus steynii IBT 23096
A0A2I2GLQ8	Aspergillus steynii IBT 23096	A0A2I2GLQ8	Aspergillus steynii IBT 23096
A0A2J6MQ29	Burkholderia sp. WAC0059	A0A2J6MQ29	Burkholderia sp. WAC0059
A0A2J6QJH4	Pezoloma ericae	A0A2J6QJH4	Pezoloma ericae
A0A2J6QMC9	Pezoloma ericae	A0A2J6QMC9	Pezoloma ericae
A0A2J6R9A8	Meliniomyces variabilis F	A0A2J6R9A8	Meliniomyces variabilis F
A0A2J6SZ63	Meliniomyces bicolor E	A0A2J6SZ63	Meliniomyces bicolor E
A0A2J7TI89	Methylocella silvestris	A0A2J7TI89	Methylocella silvestris
A0A2J7TI89	Methylocella silvestris	B8EQB0	Methylocella silvestris BL2
A0A2J7TKQ4	Methylocella silvestris	A0A2J7TKQ4	Methylocella silvestris
A0A2J7TKQ4	Methylocella silvestris	B8EL97	Methylocella silvestris BL2
A0A2K1QVK2	None	A0A2K1QVK2	None
A0A2K1QVK2	None	A0A2P7Z220	Elsinoe australis
A0A2K1R1C4	None	A0A2K1R1C4	None
A0A2K3QQ43	Tolypocladium capitatum	A0A0L0N9G3	Tolypocladium ophioglossoides CBS 100239
A0A2K3QQ43	Tolypocladium capitatum	A0A2K3QQ43	Tolypocladium capitatum
A0A2K8VYX2	Dickeya solani RNS 08.23.3.1.A	A0A0A8FHX4	Dickeya zeae EC1
A0A2K8VYX2	Dickeya solani RNS 08.23.3.1.A	A0A2K8QRQ8	Dickeya fangzhongdai
A0A2K8VYX2	Dickeya solani RNS 08.23.3.1.A	A0A2K8VYX2	Dickeya solani RNS 08.23.3.1.A
A0A2K8VYX2	Dickeya solani RNS 08.23.3.1.A	A0A2K9QJ78	Dickeya zeae
A0A2K8VYX2	Dickeya solani RNS 08.23.3.1.A	E0SIZ4	Dickeya dadantii 3937
A0A2K8YNB3	Bradyrhizobium sp. SK17	A0A2K8YNB3	Bradyrhizobium sp. SK17
A0A2K9FJ62	Streptomyces sp. CMB-StM0423	A0A2K9FJ62	Streptomyces sp. CMB-StM0423
A0A2K9HJP8	Lactobacillus alimentarius DSM 20249	A0A0H4LHD1	Lactobacillus farciminis
A0A2K9HJP8	Lactobacillus alimentarius DSM 20249	A0A0R1IW45	Lactobacillus farciminis KCTC 3681 = DSM 20184
A0A2K9HJP8	Lactobacillus alimentarius DSM 20249	A0A0R1KP10	Lactobacillus paralimentarius DSM 19674
A0A2K9HJP8	Lactobacillus alimentarius DSM 20249	A0A0R2LFN3	Lactobacillus kimchiensis
A0A2K9HJP8	Lactobacillus alimentarius DSM 20249	A0A2K9HJP8	Lactobacillus alimentarius DSM 20249
A0A2K9HJP8	Lactobacillus alimentarius DSM 20249	A0A2P4R4P8	Lactobacillus formosensis
A0A2L0IFS4	Pantoea gaviniae	A0A2L0IFS4	Pantoea gaviniae
A0A2M8VGS8	Methylobacterium radiotolerans	A0A2M8VGS8	Methylobacterium radiotolerans
A0A2M8ZFS2	Afipia broomeae	A0A1N6L9X4	Bradyrhizobium erythrophlei
A0A2M8ZFS2	Afipia broomeae	A0A2M8ZFS2	Afipia broomeae
A0A2N3NL11	Lomentospora prolificans	A0A2N3NL11	Lomentospora prolificans
A0A2N3SFA0	Plantactinospora sp. CNZ320	A0A1C4WE42	Micromonospora tulbaghiae
A0A2N3SFA0	Plantactinospora sp. CNZ320	A0A1Q5HIP7	Micromonospora sp. TSRI0369
A0A2N3SFA0	Plantactinospora sp. CNZ320	A0A1S1WMB6	Micromonospora sp. WMMB235
A0A2N3SFA0	Plantactinospora sp. CNZ320	A0A2N3SFA0	Plantactinospora sp. CNZ320
A0A2N3SFA0	Plantactinospora sp. CNZ320	A0A365V221
A0A2N5CF24	Cupriavidus pauculus	A0A1H0RUH6	Ralstonia sp. 25mfcol4.1
A0A2N5CF24	Cupriavidus pauculus	A0A1I1N807	Cupriavidus sp. OV038
A0A2N5CF24	Cupriavidus pauculus	A0A2N5CF24	Cupriavidus pauculus
A0A2N5CF24	Cupriavidus pauculus	A0A316EY09
A0A2N5FEF9	Bacillus sp. UMB0893	A0A2N5FEF9	Bacillus sp. UMB0893
A0A2N5NCB9	Paenibacillus pasadenensis	A0A2N5NCB9	Paenibacillus pasadenensis
A0A2N6P2B2	Beauveria bassiana	A0A0A2VFT9	Beauveria bassiana D1-5
A0A2N6P2B2	Beauveria bassiana	A0A167EHB3	Cordyceps brongniartii RCEF 3172
A0A2N6P2B2	Beauveria bassiana	A0A168JBJ4	Cordyceps confragosa RCEF 1005
A0A2N6P2B2	Beauveria bassiana	A0A2N6P2B2	Beauveria bassiana
A0A2N6P2B2	Beauveria bassiana	A0A2S7YNB7	Beauveria bassiana
A0A2N6P2B2	Beauveria bassiana	J5JJG2	Beauveria bassiana ARSEF 2860
A0A2N8MD68	Beijerinckiaceae bacterium	A0A2N8MD68	Beijerinckiaceae bacterium
A0A2N8MDT9	Beijerinckiaceae bacterium	A0A2N8MDT9	Beijerinckiaceae bacterium
A0A2N9MTY2	Candidatus Sulfopaludibacter sp. SbA3	A0A2N9MTY2	Candidatus Sulfopaludibacter sp. SbA3
A0A2P1BKM4	Bacillus pumilus	A0A081LG45	Bacillus zhangzhouensis
A0A2P1BKM4	Bacillus pumilus	A0A0H1RZ44	Bacillus pumilus
A0A2P1BKM4	Bacillus pumilus	A0A0J1L7Q6	Bacillus altitudinis
A0A2P1BKM4	Bacillus pumilus	A0A0P7G2A8	Bacillus australimaris
A0A2P1BKM4	Bacillus pumilus	A0A0Q3WEE6	Bacillus sp. FJAT-21955
A0A2P1BKM4	Bacillus pumilus	A0A0X9MWW7	Streptococcus pneumoniae
A0A2P1BKM4	Bacillus pumilus	A0A1C3ZVS0	Bacillus sp. nio-1130
A0A2P1BKM4	Bacillus pumilus	A0A1K2DFL9	Bacillus sp. ru9509.4
A0A2P1BKM4	Bacillus pumilus	A0A1L6ZFX1	Bacillus safensis
A0A2P1BKM4	Bacillus pumilus	A0A1R3VQL3	Bacillus sp. RRD69
A0A2P1BKM4	Bacillus pumilus	A0A1V9CKS4	Bacillus stratosphericus
A0A2P1BKM4	Bacillus pumilus	A0A2B6L1G0	Bacillus safensis
A0A2P1BKM4	Bacillus pumilus	A0A2K2HNB5	Bacillus stratosphericus
A0A2P1BKM4	Bacillus pumilus	A0A2P1BKM4	Bacillus pumilus
A0A2P1BKM4	Bacillus pumilus	A0A2T0C9W5	Bacillus pumilus
A0A2P1BKM4	Bacillus pumilus	A0A2T0D695	Bacillus pumilus
A0A2P1BKM4	Bacillus pumilus	A0A2V5H4E6	Bacillus aerius
A0A2P1BKM4	Bacillus pumilus	A0A2Y9UQ65	Bacillus sp. Nf3
A0A2P1BKM4	Bacillus pumilus	A0A328QWF1
A0A2P1BKM4	Bacillus pumilus	A0A329JD67
A0A2P1BKM4	Bacillus pumilus	A0A358H483
A0A2P1BKM4	Bacillus pumilus	A0A371V377
A0A2P1BKM4	Bacillus pumilus	A8FH42	Bacillus pumilus SAFR-032
A0A2P1BKM4	Bacillus pumilus	K2P096	Bacillus xiamenensis
A0A2P1BKM4	Bacillus pumilus	W8RLA2	Bacillus pumilus
A0A2P2ET27	Trichophyton mentagrophytes	A0A022WFJ0	Trichophyton rubrum CBS 288.86
A0A2P2ET27	Trichophyton mentagrophytes	A0A178F8U8	Trichophyton violaceum
A0A2P2ET27	Trichophyton mentagrophytes	A0A2P2ET27	Trichophyton mentagrophytes
A0A2P2ET27	Trichophyton mentagrophytes	E4V2E9	Nannizzia gypsea CBS 118893
A0A2P4HJJ7	Quercus suber	A0A2P4HJJ7	Quercus suber
A0A2P4HU31	Quercus suber	A0A2P4HU31	Quercus suber
A0A2P4L774	Quercus suber	A0A2P4HJH5	Quercus suber
A0A2P4L774	Quercus suber	A0A2P4L774	Quercus suber
A0A2P4ZD02	Trichoderma gamsii	A0A2K0SZZ5	Trichoderma gamsii
A0A2P4ZD02	Trichoderma gamsii	A0A2P4ZD02	Trichoderma gamsii
A0A2P4ZD02	Trichoderma gamsii	G9NK83	Trichoderma atroviride IMI 206040
A0A2P5HZ77	Diaporthe helianthi	A0A2P5HZ77	Diaporthe helianthi
A0A2P5I3N8	Diaporthe helianthi	A0A0G2FCJ1	Diaporthe ampelina
A0A2P5I3N8	Diaporthe helianthi	A0A2P5I3N8	Diaporthe helianthi
A0A2P5I4E1	Diaporthe helianthi	A0A0G2HWH9	Diaporthe ampelina
A0A2P5I4E1	Diaporthe helianthi	A0A2P5I4E1	Diaporthe helianthi
A0A2P5SVB1	Pantoea sp. SoEL	A0A2P5SVB1	Pantoea sp. SoEL
A0A2P5SXA4	Pantoea sp. SoET	A0A2P5SXA4	Pantoea sp. SoET
A0A2P5SZ88	Pantoea sp. SoEE	A0A2P5SZ88	Pantoea sp. SoEE
A0A2P5T168	Pantoea sp. SoEO	A0A2P5T168	Pantoea sp. SoEO
A0A2P7B0R0	Phyllobacterium endophyticum	A0A2P7B0R0	Phyllobacterium endophyticum
A0A2P7B0R0	Phyllobacterium endophyticum	A0A368YC78
A0A2P7SAG7	Mesorhizobium soli	A0A2P7SAG7	Mesorhizobium soli
A0A2P7Z694	Elsinoe australis	A0A2P7Z694	Elsinoe australis
A0A2R4FKU1	Plantactinospora sp. BB1	A0A2R4FKU1	Plantactinospora sp. BB1
A0A2R5ELQ1	Paenibacillus agaridevorans	A0A2R5ELQ1	Paenibacillus agaridevorans
A0A2R6NRT5	Phlebia centrifuga	A0A2R6NRT5	Phlebia centrifuga
A0A2R6NTS9	Phlebia centrifuga	A0A2R6NTS9	Phlebia centrifuga
A0A2R6NXD9	Phlebia centrifuga	A0A2R6NXD9	Phlebia centrifuga
A0A2R6P073	Phlebia centrifuga	A0A2R6P073	Phlebia centrifuga
A0A2R6PBR5	Phlebia centrifuga	A0A2R6PBR5	Phlebia centrifuga
A0A2R6QBH0	Phlebia centrifuga	A0A2R6QBH0	Phlebia centrifuga
A0A2R6QBJ8	Phlebia centrifuga	A0A2R6QBJ8	Phlebia centrifuga
A0A2R6QM51	Phlebia centrifuga	A0A2R6QM51	Phlebia centrifuga
A0A2R6RLQ3	Phlebia centrifuga	A0A2R6RLQ3	Phlebia centrifuga
A0A2R7KJ83	Pedobacter sp. HMWF019	A0A2R7KJ83	Pedobacter sp. HMWF019
A0A2R8CJC4	Kushneria phyllosphaerae	A0A2R8CJC4	Kushneria phyllosphaerae
A0A2R9UH50	Microbacterium sp. 71-36	A0A2R9UH50	Microbacterium sp. 71-36
A0A2S0UFJ2	Paenibacillus sp. CAA11	A0A2S0UFJ2	Paenibacillus sp. CAA11
A0A2S4KLB2	Tolypocladium paradoxum	A0A0L0NE19	Tolypocladium ophioglossoides CBS 100239
A0A2S4KLB2	Tolypocladium paradoxum	A0A2S4KLB2	Tolypocladium paradoxum
A0A2S5H9Z5	Brevibacillus laterosporus	A0A075R841	Brevibacillus laterosporus LMG 15441
A0A2S5H9Z5	Brevibacillus laterosporus	A0A0F7EFJ1	Brevibacillus laterosporus
A0A2S5H9Z5	Brevibacillus laterosporus	A0A177XL52	Brevibacillus sp. SKDU10
A0A2S5H9Z5	Brevibacillus laterosporus	A0A2S5H9Z5	Brevibacillus laterosporus
A0A2S5H9Z5	Brevibacillus laterosporus	A0A371TVK6
A0A2S5H9Z5	Brevibacillus laterosporus	H0U6F0	Brevibacillus laterosporus GI-9
A0A2S5U1P7	Kaistia algarum	A0A2S5U1P7	Kaistia algarum
A0A2S5U1P7	Kaistia algarum	A0A327KTW5
A0A2S5U1P7	Kaistia algarum	A0A327L724
A0A2S5VZP2	Subtercola sp. Z020	A0A2S5VZP2	Subtercola sp. Z020
A0A2S5WQ61	Pseudoclavibacter sp. RFBB5	A0A1H3THF1	Asanoa ishikariensis
A0A2S5WQ61	Pseudoclavibacter sp. RFBB5	A0A2S5WQ61	Pseudoclavibacter sp. RFBB5
A0A2S5XFF4	Rathayibacter sp. AY1C5	A0A2S5XFF4	Rathayibacter sp. AY1C5
A0A2S5XFF4	Rathayibacter sp. AY1C5	A0A2S5XQT4	Rathayibacter sp. AY1F3
A0A2S5XFF4	Rathayibacter sp. AY1C5	A0A2S5YGJ7	Rathayibacter sp. AY1B1
A0A2S6BR52	Cercospora berteroae	A0A2S6BR52	Cercospora berteroae
A0A2S6MTM7	Rhodopila globiformis	A0A2S6MTM7	Rhodopila globiformis
A0A2S7IJJ8	Siphonobacter curvatus	A0A2S7IJJ8	Siphonobacter curvatus
A0A2S7PSS1	Rutstroemia sp. NJR-2017a BVV2	A0A2S7PSS1	Rutstroemia sp. NJR-2017a BVV2
A0A2S7PSS1	Rutstroemia sp. NJR-2017a BVV2	A0A2S7QBY2	Rutstroemia sp. NJR-2017a WRK4
A0A2S7PX94	Rutstroemia sp. NJR-2017a BVV2	A0A2S7PX94	Rutstroemia sp. NJR-2017a BVV2
A0A2S7Q549	Rutstroemia sp. NJR-2017a WRK4	A0A2S7P9A5	Rutstroemia sp. NJR-2017a BBW
A0A2S7Q549	Rutstroemia sp. NJR-2017a WRK4	A0A2S7Q549	Rutstroemia sp. NJR-2017a WRK4
A0A2S8FNB4	Blastopirellula marina	A0A2S8FNB4	Blastopirellula marina
A0A2S8XXC4	Ochrobactrum sp. MYb68	A0A2S8XXC4	Ochrobactrum sp. MYb68
A0A2S9JPC2	Phyllobacterium myrsinacearum	A0A2S9JPC2	Phyllobacterium myrsinacearum
A0A2T2N261	Corynespora cassiicola Philippines	A0A2T2N261	Corynespora cassiicola Philippines
A0A2T2N4E8	Corynespora cassiicola Philippines	A0A2T2N4E8	Corynespora cassiicola Philippines
A0A2T2P7R7	Corynespora cassiicola Philippines	A0A2T2P7R7	Corynespora cassiicola Philippines
A0A2T2ZYC3	Coniella lustricola	A0A2T2ZYC3	Coniella lustricola
A0A2T3AIG7	Coniella lustricola	A0A194UP02	Valsa mali var. pyri
A0A2T3AIG7	Coniella lustricola	A0A194VTN7	Valsa mali
A0A2T3AIG7	Coniella lustricola	A0A2T3AIG7	Coniella lustricola
A0A2T3B7D8	Amorphotheca resinae ATCC 22711	A0A0C3HJY8	Oidiodendron maius Zn
A0A2T3B7D8	Amorphotheca resinae ATCC 22711	A0A2T3B7D8	Amorphotheca resinae ATCC 22711
A0A2T3BAE0	Amorphotheca resinae ATCC 22711	A0A2T3BAE0	Amorphotheca resinae ATCC 22711
A0A2T4CK30	Trichoderma longibrachiatum ATCC 18648	A0A2T4CK30	Trichoderma longibrachiatum ATCC 18648
A0A2T4CK30	Trichoderma longibrachiatum ATCC 18648	G0RF14	Trichoderma reesei QM6a
A0A2T5WI29	Mycobacterium sp. YR782	A0A2T5WI29	Mycobacterium sp. YR782
A0A2T5WI29	Mycobacterium sp. YR782	A0A370CT15
A0A2T5X3V4	Methylobacterium sp. GV104	A0A0Q4ZQB6	Methylobacterium sp. Leaf104
A0A2T5X3V4	Methylobacterium sp. GV104	A0A0Q5EAB1	Methylobacterium sp. Leaf125
A0A2T5X3V4	Methylobacterium sp. GV104	A0A0S9QCB6	Methylobacterium sp. Leaf111
A0A2T5X3V4	Methylobacterium sp. GV104	A0A2S4LPY5	Methylobacterium sp. V23
A0A2T5X3V4	Methylobacterium sp. GV104	A0A2T5X3V4	Methylobacterium sp. GV104
A0A2T6G4R4	Paenibacillus elgii	A0A0P9FSZ3	Paenibacillus sp. A3
A0A2T6G4R4	Paenibacillus elgii	A0A163X4L1	Paenibacillus elgii
A0A2T6G4R4	Paenibacillus elgii	A0A2T6G4R4	Paenibacillus elgii
A0A2U1SLB7	Methylocystis sp. MitZ-2018	A0A2P5M1J8	Methylocystis sp.
A0A2U1SLB7	Methylocystis sp. MitZ-2018	A0A2S5M2H3	Methylocystis sp.
A0A2U1SLB7	Methylocystis sp. MitZ-2018	A0A2U1SLB7	Methylocystis sp. MitZ-2018
A0A2U1SMG4	Methylosinus sporium	A0A177P9J5	Methylosinus sp. R-45379
A0A2U1SMG4	Methylosinus sporium	A0A2D2D6B4	Methylosinus trichosporium OB3b
A0A2U1SMG4	Methylosinus sporium	A0A2U1SMG4	Methylosinus sporium
A0A2U3LJI7	Candidatus Sulfopaludibacter sp. SbA4	A0A2U3LJI7	Candidatus Sulfopaludibacter sp. SbA4
A0A2U8VMD1	Methylobacterium sp. 17Sr1-43	A0A2U8VMD1	Methylobacterium sp. 17Sr1-43
A0A2U8W0Z7	Methylobacterium sp. 17SD2-17	A0A2U8W0Z7	Methylobacterium sp. 17SD2-17
A0A2U8WA31	Methylobacterium sp. 17SD2-17	A0A2U8WA31	Methylobacterium sp. 17SD2-17
A0A2U9DC45	Pantoea vagans	A0A2U9DC45	Pantoea vagans
A0A2V1BIR2	Cadophora sp. DSE1049	A0A1E1K5L4	Rhynchosporium agropyri
A0A2V1BIR2	Cadophora sp. DSE1049	A0A1E1KUZ9	Rhynchosporium commune
A0A2V1BIR2	Cadophora sp. DSE1049	A0A2V1BIR2	Cadophora sp. DSE1049
A0A2V1BX97	Cadophora sp. DSE1049	A0A2V1BX97	Cadophora sp. DSE1049
A0A2V1CI92	Cadophora sp. DSE1049	A0A2V1CI92	Cadophora sp. DSE1049
A0A2V1DQD0	Periconia macrospinosa	A0A2V1DQD0	Periconia macrospinosa
A0A2V1E001	Periconia macrospinosa	A0A2V1E001	Periconia macrospinosa
A0A2V1E4R0	Periconia macrospinosa	A0A2V1E4R0	Periconia macrospinosa
A0A2V1K3N3	Bordetella sp. 3d-2-2	A0A2V1K3N3	Bordetella sp. 3d-2-2
A0A2V2RUY1	Verrucomicrobia bacterium	A0A2V2RUY1	Verrucomicrobia bacterium
A0A2V5HZZ7	Aspergillus indologenus CBS 114.80	A0A1L9WN78	Aspergillus aculeatus ATCC 16872
A0A2V5HZZ7	Aspergillus indologenus CBS 114.80	A0A2V5HZZ7	Aspergillus indologenus CBS 114.80
A0A2V5HZZ7	Aspergillus indologenus CBS 114.80	A0A2V5I636	Aspergillus violaceofuscus CBS 115571
A0A2V5HZZ7	Aspergillus indologenus CBS 114.80	A0A318ZN18
A0A2V5HZZ7	Aspergillus indologenus CBS 114.80	A0A319CWL3
A0A2V5IIL5	Aspergillus violaceofuscus CBS 115571	A0A1L9WNC9	Aspergillus aculeatus ATCC 16872
A0A2V5IIL5	Aspergillus violaceofuscus CBS 115571	A0A2V5IIL5	Aspergillus violaceofuscus CBS 115571
A0A2V5IIL5	Aspergillus violaceofuscus CBS 115571	A0A2V5J1R7	Aspergillus indologenus CBS 114.80
A0A2V5IIL5	Aspergillus violaceofuscus CBS 115571	A0A318ZKN1
A0A2V5IIL5	Aspergillus violaceofuscus CBS 115571	A0A319CDP6
A0A2V5KCA8	Paenibacillus sp. DXL2	A0A2V5KCA8	Paenibacillus sp. DXL2
A0A2V5QXH4	Verrucomicrobia bacterium	A0A2V5QXH4	Verrucomicrobia bacterium
A0A2V5QXH4	Verrucomicrobia bacterium	A0A2V5SP75	Verrucomicrobia bacterium
A0A2V5RVI1	Verrucomicrobia bacterium	A0A1Q6VF84	Verrucomicrobia bacterium 13_2_20CM_54_12
A0A2V5RVI1	Verrucomicrobia bacterium	A0A1Q7THZ5	Verrucomicrobia bacterium 13_1_20CM_4_54_11
A0A2V5RVI1	Verrucomicrobia bacterium	A0A2V5L3B4	Verrucomicrobia bacterium
A0A2V5RVI1	Verrucomicrobia bacterium	A0A2V5LE97	Verrucomicrobia bacterium
A0A2V5RVI1	Verrucomicrobia bacterium	A0A2V5MDT5	Verrucomicrobia bacterium
A0A2V5RVI1	Verrucomicrobia bacterium	A0A2V5NJK7	Verrucomicrobia bacterium
A0A2V5RVI1	Verrucomicrobia bacterium	A0A2V5PME7	Verrucomicrobia bacterium
A0A2V5RVI1	Verrucomicrobia bacterium	A0A2V5Q422	Verrucomicrobia bacterium
A0A2V5RVI1	Verrucomicrobia bacterium	A0A2V5RR38	Verrucomicrobia bacterium
A0A2V5RVI1	Verrucomicrobia bacterium	A0A2V5RVI1	Verrucomicrobia bacterium
A0A2V5RVI1	Verrucomicrobia bacterium	A0A2V5SWS5	Verrucomicrobia bacterium
A0A2V5RVI1	Verrucomicrobia bacterium	A0A2V5TAI2	Verrucomicrobia bacterium
A0A2V5RVI1	Verrucomicrobia bacterium	A0A2V5VIS8	Verrucomicrobia bacterium
A0A2V5RVI1	Verrucomicrobia bacterium	A0A2V5Z688	Verrucomicrobia bacterium
A0A2V5RVI1	Verrucomicrobia bacterium	A0A2V6BGJ0	Verrucomicrobia bacterium
A0A2V5RVI1	Verrucomicrobia bacterium	A0A2V6G5M6	Verrucomicrobia bacterium
A0A2V5RVI1	Verrucomicrobia bacterium	A0A2V6JX88	Verrucomicrobia bacterium
A0A2V5WLB3	Verrucomicrobia bacterium	A0A2V5WLB3	Verrucomicrobia bacterium
A0A2V6DJB7	Verrucomicrobia bacterium	A0A2V5UX28	Verrucomicrobia bacterium
A0A2V6DJB7	Verrucomicrobia bacterium	A0A2V6DJB7	Verrucomicrobia bacterium
A0A2V6DJB7	Verrucomicrobia bacterium	A0A2V6IVW3	Verrucomicrobia bacterium
A0A2V6ET93	Verrucomicrobia bacterium	A0A1Q7V4A6	Verrucomicrobia bacterium 13_1_20CM_3_54_17
A0A2V6ET93	Verrucomicrobia bacterium	A0A2V6ET93	Verrucomicrobia bacterium
A0A2V6ET93	Verrucomicrobia bacterium	A0A2V6NGV8	Verrucomicrobia bacterium
A0A2V6ET93	Verrucomicrobia bacterium	A0A2V6NQ86	Verrucomicrobia bacterium
A0A2V6ET93	Verrucomicrobia bacterium	A0A2V6P2M5	Verrucomicrobia bacterium
A0A2V6ET93	Verrucomicrobia bacterium	A0A2V8NU89	Acidobacteria bacterium
A0A2V6GDS0	Verrucomicrobia bacterium	A0A2V6GDS0	Verrucomicrobia bacterium
A0A2V6HN08	Verrucomicrobia bacterium	A0A2V6HMC6	Verrucomicrobia bacterium
A0A2V6HN08	Verrucomicrobia bacterium	A0A2V6HN08	Verrucomicrobia bacterium
A0A2V6HN08	Verrucomicrobia bacterium	A0A2V9A4M3	Acidobacteria bacterium
A0A2V6L5E4	Verrucomicrobia bacterium	A0A2V5R8C6	Verrucomicrobia bacterium
A0A2V6L5E4	Verrucomicrobia bacterium	A0A2V5YZG2	Verrucomicrobia bacterium
A0A2V6L5E4	Verrucomicrobia bacterium	A0A2V6E6X4	Verrucomicrobia bacterium
A0A2V6L5E4	Verrucomicrobia bacterium	A0A2V6L5E4	Verrucomicrobia bacterium
A0A2V6L5E4	Verrucomicrobia bacterium	A0A2V6L7W1	Verrucomicrobia bacterium
A0A2V6M8N1	Verrucomicrobia bacterium	A0A2V6EWR0	Verrucomicrobia bacterium
A0A2V6M8N1	Verrucomicrobia bacterium	A0A2V6M8N1	Verrucomicrobia bacterium
A0A2V6M8N1	Verrucomicrobia bacterium	A0A2V6MRS2	Verrucomicrobia bacterium
A0A2V6M8N1	Verrucomicrobia bacterium	A0A2V6NKJ8	Verrucomicrobia bacterium
A0A2V6ME40	Verrucomicrobia bacterium	A0A2V6ME40	Verrucomicrobia bacterium
A0A2V6ME40	Verrucomicrobia bacterium	A0A2V8PLI4	Acidobacteria bacterium
A0A2V6P2Y8	Verrucomicrobia bacterium	A0A2V6P2Y8	Verrucomicrobia bacterium
A0A2V6UTU6	Candidatus Rokubacteria bacterium	A0A2V6UTU6	Candidatus Rokubacteria bacterium
A0A2V6UTU6	Candidatus Rokubacteria bacterium	A0A2V7HW67	Candidatus Rokubacteria bacterium
A0A2V8L3C9	Acidobacteria bacterium	A0A2V8L3C9	Acidobacteria bacterium
A0A2V8XP51	Acidobacteria bacterium	A0A2V8XP51	Acidobacteria bacterium
A0A2V8XP51	Acidobacteria bacterium	A0A2V9A338	Acidobacteria bacterium
A0A2V8ZWL2	Acidobacteria bacterium	A0A2V8Z6Z0	Acidobacteria bacterium
A0A2V8ZWL2	Acidobacteria bacterium	A0A2V8ZWL2	Acidobacteria bacterium
A0A2V8ZWL2	Acidobacteria bacterium	A0A2V9C9D6	Acidobacteria bacterium
A0A2V9AYC1	Acidobacteria bacterium	A0A1Q7MW15	Acidobacteriales bacterium 13_1_40CM_3_55_5
A0A2V9AYC1	Acidobacteria bacterium	A0A2V9AYC1	Acidobacteria bacterium
A0A2V9AYC1	Acidobacteria bacterium	A0A2V9SC04	Acidobacteria bacterium
A0A2V9CL80	Acidobacteria bacterium	A0A2V9CL80	Acidobacteria bacterium
A0A2V9W7E5	Acidobacteria bacterium	A0A2V9W7E5	Acidobacteria bacterium
A0A2V9WJ81	Acidobacteria bacterium	A0A2V9WJ81	Acidobacteria bacterium
A0A2V9WJ81	Acidobacteria bacterium	A0A2V9YE46	Acidobacteria bacterium
A0A2W0BQX1	Acidobacteria bacterium	A0A2W0AM40	Acidobacteria bacterium
A0A2W0BQX1	Acidobacteria bacterium	A0A2W0B7X5	Acidobacteria bacterium
A0A2W0BQX1	Acidobacteria bacterium	A0A2W0BQX1	Acidobacteria bacterium
A0A2W1E0P8	Pyrenophora tritici-repentis	A0A2W1E0P8	Pyrenophora tritici-repentis
A0A2W1E0P8	Pyrenophora tritici-repentis	B2VWS2	Pyrenophora tritici-repentis Pt-1C-BFP
A0A2W2BDM7	Rhizobiales bacterium KCTC 52945	A0A2W2BDM7	Rhizobiales bacterium KCTC 52945
A0A2W3Z233	Enterococcus plantarum	A0A0U2XBT4	Enterococcus rotai
A0A2W3Z233	Enterococcus plantarum	A0A1E5GE79	Enterococcus ureasiticus
A0A2W3Z233	Enterococcus plantarum	A0A1E5HDL3	Enterococcus ureilyticus
A0A2W3Z233	Enterococcus plantarum	A0A2W3Z233	Enterococcus plantarum
A0A2W4CRQ1	Rhizobium tubonense	A0A2W4CRQ1	Rhizobium tubonense
A0A2W4GJ39	Paenibacillus dendritiformis	A0A2W4GJ39	Paenibacillus dendritiformis
A0A2W4GJ39	Paenibacillus dendritiformis	A0A378ZNQ6
A0A2W4GJ39	Paenibacillus dendritiformis	H3SH60	Paenibacillus dendritiformis C454
A0A2W4GJ39	Paenibacillus dendritiformis	M9LBN2	Paenibacillus popilliae ATCC 14706
A0A2W4HZE2	Candidatus Melainabacteria bacterium	A0A2W4HZE2	Candidatus Melainabacteria bacterium
A0A2W5GY39	Pseudopedobacter saltans	A0A2W5GY39	Pseudopedobacter saltans
A0A2W5R7U5	Starkeya novella	A0A2W5R7U5	Starkeya novella
A0A2W5R7U5	Starkeya novella	D7AA20	Starkeya novella DSM 506
A0A2W5RZ26	Rhodobacter sphaeroides	A0A2W5RZ26	Rhodobacter sphaeroides
A0A2W6Y0K1	Chelatococcus sp.	A0A2W6Y0K1	Chelatococcus sp.
A0A2W6YBY1	Shinella sp.	A0A2W6YBY1	Shinella sp.
A1C785	Aspergillus clavatus NRRL 1	A1C785	Aspergillus clavatus NRRL 1
A3ZY46	Blastopirellula marina DSM 3645	A3ZY46	Blastopirellula marina DSM 3645
A7EZM9	Sclerotinia sclerotiorum 1980 UF-70	A7EZM9	Sclerotinia sclerotiorum 1980 UF-70
A8I194	Azorhizobium caulinodans ORS 571	A0A1M7ZPK5	Pseudoxanthobacter soli DSM 19599
A8I194	Azorhizobium caulinodans ORS 571	A0A258K6T9	Azorhizobium sp. 35-67-5
A8I194	Azorhizobium caulinodans ORS 571	A0A259JMI4	Azorhizobium sp. 39-67-5
A8I194	Azorhizobium caulinodans ORS 571	A8I194	Azorhizobium caulinodans ORS 571
A8NVA5	Coprinopsis cinerea okayama7#130	A8NVA5	Coprinopsis cinerea okayama7#130
B2ATI7	Podospora anserina S mat+	B2ATI7	Podospora anserina S mat+
B2II46	Beijerinckia indica subsp. indica ATCC 9039	B2II46	Beijerinckia indica subsp. indica ATCC 9039
B3QK43	Rhodopseudomonas palustris TIE-1	A0A2R4GQZ8	Rhodopseudomonas palustris
B3QK43	Rhodopseudomonas palustris TIE-1	B3QK43	Rhodopseudomonas palustris TIE-1
B3QK43	Rhodopseudomonas palustris TIE-1	Q2J3P9	Rhodopseudomonas palustris HaA2
B6QLX6	Talaromyces marneffei ATCC 18224	A0A093UXM7	Talaromyces marneffei PM1
B6QLX6	Talaromyces marneffei ATCC 18224	A0A093XIJ3	Talaromyces marneffei PM1
B6QLX6	Talaromyces marneffei ATCC 18224	A0A2H3I9X2	Penicillium occitanis
B6QLX6	Talaromyces marneffei ATCC 18224	B6QLX6	Talaromyces marneffei ATCC 18224
B8EPA5	Methylocella silvestris BL2	B8EPA5	Methylocella silvestris BL2
B8ESY2	Methylocella silvestris BL2	B8ESY2	Methylocella silvestris BL2
B8MF86	Talaromyces stipitatus ATCC 10500	B8MF86	Talaromyces stipitatus ATCC 10500
B8MQE3	Talaromyces stipitatus ATCC 10500	B8MQE3	Talaromyces stipitatus ATCC 10500
B8NWS9	Aspergillus flavus NRRL3357	A0A0F0IKF9	Aspergillus parasiticus SU-1
B8NWS9	Aspergillus flavus NRRL3357	A0A0L1JH93	Aspergillus nomius NRRL 13137
B8NWS9	Aspergillus flavus NRRL3357	A0A1F8A863	Aspergillus bombycis
B8NWS9	Aspergillus flavus NRRL3357	A0A1S9DFU5	Aspergillus oryzae
B8NWS9	Aspergillus flavus NRRL3357	A0A2G7G1X7	Aspergillus arachidicola
B8NWS9	Aspergillus flavus NRRL3357	A0A2P2HPF2	Aspergillus flavus AF70
B8NWS9	Aspergillus flavus NRRL3357	B8NWS9	Aspergillus flavus NRRL3357
B8NWS9	Aspergillus flavus NRRL3357	I7ZUB9	Aspergillus oryzae 3.042
B8NWS9	Aspergillus flavus NRRL3357	Q2TWB3	Aspergillus oryzae RIB40
B9JM25	Agrobacterium radiobacter K84	B9JM25	Agrobacterium radiobacter K84
B9XMK9	Pedosphaera parvula Ellin514	B9XMK9	Pedosphaera parvula Ellin514
C2PSC0	Bacillus cereus AH621	A0A084ITV0	Bacillus mycoides
C2PSC0	Bacillus cereus AH621	A0A0C2R5K2	Jeotgalibacillus soli
C2PSC0	Bacillus cereus AH621	A0A0D0Q5C2	Bacillus sp. L_1B0_8
C2PSC0	Bacillus cereus AH621	A0A0G4D732	Bacillus thuringiensis serovar tolworthi
C2PSC0	Bacillus cereus AH621	A0A0G8EVD4	Bacillus cereus
C2PSC0	Bacillus cereus AH621	A0A0J6NWI4	Bacillus sp. LK2
C2PSC0	Bacillus cereus AH621	A0A0J6P6S4	Bacillus sp. LK2
C2PSC0	Bacillus cereus AH621	A0A0J7H4A9	Bacillus cereus
C2PSC0	Bacillus cereus AH621	A0A0K0Q8R1	Bacillus thuringiensis
C2PSC0	Bacillus cereus AH621	A0A0K0S410	Bacillus thuringiensis serovar indiana
C2PSC0	Bacillus cereus AH621	A0A0K9GWA5	Bacillus loiseleuriae
C2PSC0	Bacillus cereus AH621	A0A0T8MJI0	Streptococcus pneumoniae
C2PSC0	Bacillus cereus AH621	A0A150BZP2	Bacillus cereus
C2PSC0	Bacillus cereus AH621	A0A150DA62	Bacillus cereus
C2PSC0	Bacillus cereus AH621	A0A160H9F8	Bacillus cereus
C2PSC0	Bacillus cereus AH621	A0A162SGV0	Bacillus cereus
C2PSC0	Bacillus cereus AH621	A0A193CPH2	Bacillus thuringiensis serovar coreanensis
C2PSC0	Bacillus cereus AH621	A0A1C4B1Y8	Bacillus mycoides
C2PSC0	Bacillus cereus AH621	A0A1C9BPI8	Bacillus thuringiensis Bt18247
C2PSC0	Bacillus cereus AH621	A0A1G1UMF1	Bacillus sp. RZ2MS9
C2PSC0	Bacillus cereus AH621	A0A1G4EM06	Bacillus mycoides
C2PSC0	Bacillus cereus AH621	A0A1H0FC38	Bacillus sp. OK048
C2PSC0	Bacillus cereus AH621	A0A1I6QYP4	Paenibacillus sp. 453mf
C2PSC0	Bacillus cereus AH621	A0A1J9W0L8	None
C2PSC0	Bacillus cereus AH621	A0A1J9WTF1	Bacillus cereus
C2PSC0	Bacillus cereus AH621	A0A1M6GS77	Bacillus sp. cl25
C2PSC0	Bacillus cereus AH621	A0A1M7BPF3	Bacillus sp. bc15
C2PSC0	Bacillus cereus AH621	A0A1Q9I3J3	Bacillus cereus
C2PSC0	Bacillus cereus AH621	A0A1Q9KM46	Bacillus sp. MB366
C2PSC0	Bacillus cereus AH621	A0A1S9V8E9	Bacillus cereus
C2PSC0	Bacillus cereus AH621	A0A1S9YT64	Bacillus cereus
C2PSC0	Bacillus cereus AH621	A0A1V9W220	Bacillus sp. CDB3
C2PSC0	Bacillus cereus AH621	A0A1W2GUA1	Bacillus sp. JKS001846
C2PSC0	Bacillus cereus AH621	A0A1W6WIP7	Bacillus thuringiensis
C2PSC0	Bacillus cereus AH621	A0A1Y0TS95	Bacillus thuringiensis
C2PSC0	Bacillus cereus AH621	A0A1Y6A9K7	Bacillus cereus
C2PSC0	Bacillus cereus AH621	A0A1Y6FVV5	Bacillus sp. OV166
C2PSC0	Bacillus cereus AH621	A0A1Y6FYQ0	Bacillus sp. OV166
C2PSC0	Bacillus cereus AH621	A0A221BTB6	Bacillus cereus
C2PSC0	Bacillus cereus AH621	A0A223EK90	Bacillus simplex NBRC 15720 = DSM 1321
C2PSC0	Bacillus cereus AH621	A0A226QW23	Bacillus sp. M13(2017)
C2PSC0	Bacillus cereus AH621	A0A229M319	Bacillus sp. KbaL1
C2PSC0	Bacillus cereus AH621	A0A242Y6U8	Bacillus thuringiensis serovar novosibirsk
C2PSC0	Bacillus cereus AH621	A0A242YYI0	Bacillus thuringiensis serovar londrina
C2PSC0	Bacillus cereus AH621	A0A243A1N5	Bacillus thuringiensis serovar kim
C2PSC0	Bacillus cereus AH621	A0A243BDW9	Bacillus thuringiensis serovar poloniensis
C2PSC0	Bacillus cereus AH621	A0A243C815	Bacillus thuringiensis serovar yosoo
C2PSC0	Bacillus cereus AH621	A0A243DAC3	Bacillus thuringiensis serovar subtoxicus
C2PSC0	Bacillus cereus AH621	A0A243F7Z3	Bacillus thuringiensis serovar kumamtoensis
C2PSC0	Bacillus cereus AH621	A0A243FCV3	Bacillus thuringiensis serovar kyushuensis
C2PSC0	Bacillus cereus AH621	A0A243J931	Bacillus thuringiensis serovar yunnanensis
C2PSC0	Bacillus cereus AH621	A0A243JXN3	Bacillus thuringiensis serovar higo
C2PSC0	Bacillus cereus AH621	A0A249X6V5	Bacillus cereus
C2PSC0	Bacillus cereus AH621	A0A2A2PB96	Bacillus toyonensis
C2PSC0	Bacillus cereus AH621	A0A2A7F2Z9	Bacillus cereus
C2PSC0	Bacillus cereus AH621	A0A2A7GRI2	Bacillus thuringiensis
C2PSC0	Bacillus cereus AH621	A0A2A7HBW6	Bacillus cereus
C2PSC0	Bacillus cereus AH621	A0A2A7ZT83	Bacillus cereus
C2PSC0	Bacillus cereus AH621	A0A2A8E9A0	Bacillus cereus
C2PSC0	Bacillus cereus AH621	A0A2A8KDD9	Bacillus cereus
C2PSC0	Bacillus cereus AH621	A0A2A8P9M4	Bacillus cereus
C2PSC0	Bacillus cereus AH621	A0A2A8PQ24	Bacillus cereus
C2PSC0	Bacillus cereus AH621	A0A2A8RFN3	Bacillus cereus
C2PSC0	Bacillus cereus AH621	A0A2A8Z2G2	Bacillus cereus
C2PSC0	Bacillus cereus AH621	A0A2A8ZVW6	Bacillus cereus
C2PSC0	Bacillus cereus AH621	A0A2A9HXY8	Bacillus sp. YF23
C2PSC0	Bacillus cereus AH621	A0A2B0LHA4	Bacillus cereus
C2PSC0	Bacillus cereus AH621	A0A2B1DTN9	Bacillus cereus
C2PSC0	Bacillus cereus AH621	A0A2B1FMV2	Bacillus cereus
C2PSC0	Bacillus cereus AH621	A0A2B1KY60	Bacillus cereus
C2PSC0	Bacillus cereus AH621	A0A2B2LRK5	Bacillus cereus
C2PSC0	Bacillus cereus AH621	A0A2B2MP84	Bacillus cereus
C2PSC0	Bacillus cereus AH621	A0A2B2XTH1	Bacillus cereus
C2PSC0	Bacillus cereus AH621	A0A2B3KG50	Bacillus thuringiensis
C2PSC0	Bacillus cereus AH621	A0A2B3Q919	Bacillus thuringiensis
C2PSC0	Bacillus cereus AH621	A0A2B4C9R5	Bacillus cereus
C2PSC0	Bacillus cereus AH621	A0A2B8PR41	Bacillus thuringiensis
C2PSC0	Bacillus cereus AH621	A0A2B9BPN6	Bacillus cereus
C2PSC0	Bacillus cereus AH621	A0A2B9BYB5	Bacillus cereus
C2PSC0	Bacillus cereus AH621	A0A2B9E2G5	Bacillus cereus
C2PSC0	Bacillus cereus AH621	A0A2B9SCX3	Bacillus cereus
C2PSC0	Bacillus cereus AH621	A0A2C1E129	Bacillus cereus
C2PSC0	Bacillus cereus AH621	A0A2C2V7W2	Bacillus cereus
C2PSC0	Bacillus cereus AH621	A0A2C3LHD0	Bacillus cereus
C2PSC0	Bacillus cereus AH621	A0A2C9ZHC2	Bacillus thuringiensis serovar medellin
C2PSC0	Bacillus cereus AH621	A0A2J9DAB4	Bacillus thuringiensis
C2PSC0	Bacillus cereus AH621	A0A2K8TME3	Bacillus cereus
C2PSC0	Bacillus cereus AH621	A0A2S8UJR1	Bacillus sp. MYb209
C2PSC0	Bacillus cereus AH621	A0A2T0F970	Bacillus thuringiensis
C2PSC0	Bacillus cereus AH621	A0A2V1JKC6	Bacillus cereus
C2PSC0	Bacillus cereus AH621	A0A2V2GWY2	Bacillus thuringiensis
C2PSC0	Bacillus cereus AH621	A0A365VEP1
C2PSC0	Bacillus cereus AH621	A0A366GGM2
C2PSC0	Bacillus cereus AH621	A0A366GN16
C2PSC0	Bacillus cereus AH621	A0A384FQZ0
C2PSC0	Bacillus cereus AH621	B5UKB7	Bacillus cereus AH1134
C2PSC0	Bacillus cereus AH621	C2PSC0	Bacillus cereus AH621
C2PSC0	Bacillus cereus AH621	C2R4H7	Bacillus cereus m1550
C2PSC0	Bacillus cereus AH621	C2UAA2	Bacillus cereus Rock1-15
C2PSC0	Bacillus cereus AH621	C2XQC4	Bacillus cereus AH603
C2PSC0	Bacillus cereus AH621	C3DZX7	Bacillus thuringiensis serovar pakistani str. T130
C2PSC0	Bacillus cereus AH621	G9Q9U9	Bacillus sp. 7_6_55CFAA_CT2
C2PSC0	Bacillus cereus AH621	I3E951	Bacillus methanolicus MGA3
C2PSC0	Bacillus cereus AH621	J7WHI3	Bacillus cereus BAG4O-1
C2PSC0	Bacillus cereus AH621	J8A2K1	Bacillus cereus HuA4-10
C2PSC0	Bacillus cereus AH621	J8HHQ0	Bacillus cereus VD014
C2PSC0	Bacillus cereus AH621	J8HIP6	Bacillus cereus VD045
C2PSC0	Bacillus cereus AH621	J8HRX5	Bacillus cereus VD156
C2PSC0	Bacillus cereus AH621	J8K227	Bacillus cereus VD107
C2PSC0	Bacillus cereus AH621	J8NBP6	Bacillus cereus VD200
C2PSC0	Bacillus cereus AH621	J9BQS6	Bacillus cereus HuA2-1
C2PSC0	Bacillus cereus AH621	R8CLF0	Bacillus cereus HuA2-9
C2PSC0	Bacillus cereus AH621	R8HBZ7	Bacillus cereus VD196
C2PSC0	Bacillus cereus AH621	R8QN40	Bacillus cereus VD118
C2PSC0	Bacillus cereus AH621	R8UBS3	Bacillus cereus VD184
C2PSC0	Bacillus cereus AH621	V5M5J0	Bacillus thuringiensis YBT-1518
C2PSC0	Bacillus cereus AH621	W1SMB3	Bacillus vireti LMG 21834
C4JSV9	Uncinocarpus reesii 1704	C4JSV9	Uncinocarpus reesii 1704
C5FGK1	Microsporum canis CBS 113480	C5FGK1	Microsporum canis CBS 113480
C5P8R7	Coccidioides posadasii C735 delta SOWgp	A0A0J8QIT1	Coccidioides immitis RMSCC 3703
C5P8R7	Coccidioides posadasii C735 delta SOWgp	C5P8R7	Coccidioides posadasii C735 delta SOWgp
C5P8R7	Coccidioides posadasii C735 delta SOWgp	E9D0Y3	Coccidioides posadasii str. Silveira
C5P8R7	Coccidioides posadasii C735 delta SOWgp	J3KCT2	Coccidioides immitis RS
C5WDU0	Candidatus Ishikawaella capsulata Mpkobe	C5WDU0	Candidatus Ishikawaella capsulata Mpkobe
C6IZ56	Paenibacillus sp. oral taxon 786 str. D14	A0A090ZFD7	Paenibacillus macerans
C6IZ56	Paenibacillus sp. oral taxon 786 str. D14	A0A1R1HSW4	Paenibacillus macerans
C6IZ56	Paenibacillus sp. oral taxon 786 str. D14	C6IZ56	Paenibacillus sp. oral taxon 786 str. D14
C6IZ56	Paenibacillus sp. oral taxon 786 str. D14	R9LPK1	Paenibacillus barengoltzii G22
C7BWW2	Dichomitus squalens	C7BWW2	Dichomitus squalens
C7ZI14	[Nectria] haematococca mpVI 77-13-4	C7ZI14	[Nectria] haematococca mpVI 77-13-4
C7ZQA7	[Nectria] haematococca mpVI 77-13-4	C7ZQA7	[Nectria] haematococca mpVI 77-13-4
C9SRK5	Verticillium alfalfae VaMs.102	C9SRK5	Verticillium alfalfae VaMs.102
D4B179	Trichophyton benhamiae CBS 112371	D4B179	Trichophyton benhamiae CBS 112371
D4B179	Trichophyton benhamiae CBS 112371	D4D063	Trichophyton verrucosum HKI 0517
D4GCQ8	Pantoea ananatis LMG 20103	A0A0H3KV24	Pantoea ananatis AJ13355
D4GCQ8	Pantoea ananatis LMG 20103	A0A1V9DBB5	Pantoea latae
D4GCQ8	Pantoea ananatis LMG 20103	A0A2J9E5S4	Pantoea sp. FDAARGOS_194
D4GCQ8	Pantoea ananatis LMG 20103	A0A2P5IRS0	Pantoea sp. PSNIH6
D4GCQ8	Pantoea ananatis LMG 20103	A0A2U1DKX6	Pantoea ananatis
D4GCQ8	Pantoea ananatis LMG 20103	A0A2V2BL02	Pantoea allii
D4GCQ8	Pantoea ananatis LMG 20103	A0A2V3QFC4	Pantoea sp. PNA 03-3
D4GCQ8	Pantoea ananatis LMG 20103	A0A379CXP2
D4GCQ8	Pantoea ananatis LMG 20103	D4GCQ8	Pantoea ananatis LMG 20103
D6TFN1	Ktedonobacter racemifer DSM 44963	D6TFN1	Ktedonobacter racemifer DSM 44963
D6TFN1	Ktedonobacter racemifer DSM 44963	D6U194	Ktedonobacter racemifer DSM 44963
D6U1D6	Ktedonobacter racemifer DSM 44963	D6U1D6	Ktedonobacter racemifer DSM 44963
D6U7X2	Ktedonobacter racemifer DSM 44963	D6U7X2	Ktedonobacter racemifer DSM 44963
D7A8E7	Starkeya novella DSM 506	D7A8E7	Starkeya novella DSM 506
D8Q472	Schizophyllum commune H4-8	D8Q472	Schizophyllum commune H4-8
D8Q473	Schizophyllum commune H4-8	D8Q473	Schizophyllum commune H4-8
D8Q486	Schizophyllum commune H4-8	D8Q486	Schizophyllum commune H4-8
D8Q4E8	Schizophyllum commune H4-8	D8Q4E8	Schizophyllum commune H4-8
D8QD67	Schizophyllum commune H4-8	D8QD67	Schizophyllum commune H4-8
E0RKH4	Paenibacillus polymyxa E681	A0A074LRJ4	Paenibacillus polymyxa
E0RKH4	Paenibacillus polymyxa E681	A0A0D3VAC9	Paenibacillus sp. IHBB 10380
E0RKH4	Paenibacillus polymyxa E681	A0A0F0FXM8	Paenibacillus polymyxa
E0RKH4	Paenibacillus polymyxa E681	A0A0K2F955	Paenibacillus peoriae
E0RKH4	Paenibacillus polymyxa E681	A0A0S2SAX8	Paenibacillus sp. IHB B 3084
E0RKH4	Paenibacillus polymyxa E681	A0A161S1M0	Paenibacillus jamilae
E0RKH4	Paenibacillus polymyxa E681	A0A1A0FXN9	Paenibacillus polymyxa
E0RKH4	Paenibacillus polymyxa E681	A0A1D7MPN1	Paenibacillus polymyxa
E0RKH4	Paenibacillus polymyxa E681	A0A1G7LNQ4	Fontibacillus panacisegetis
E0RKH4	Paenibacillus polymyxa E681	A0A222WMC1	Paenibacillus kribbensis
E0RKH4	Paenibacillus polymyxa E681	A0A2K1EP41	Paenibacillus sp. F4
E0RKH4	Paenibacillus polymyxa E681	A0A2S6P0L3	Paenibacillus peoriae
E0RKH4	Paenibacillus polymyxa E681	A0A2X0S5W2	Paenibacillus polymyxa
E0RKH4	Paenibacillus polymyxa E681	A0A378XYB0
E0RKH4	Paenibacillus polymyxa E681	E0RKH4	Paenibacillus polymyxa E681
E0RKH4	Paenibacillus polymyxa E681	E3EJE4	Paenibacillus polymyxa SC2
[truncated: 399 more rows]
