# Supplementary figures and images for: Microbial genetic and transcriptional contributions to oxalate degradation by the gut microbiota in health and disease
Source: eLife journal article supplement (doi:10.7554/elife.63642), 2021-03-26

category ■ Intra-class ■ Inter-class

## A. OXDD

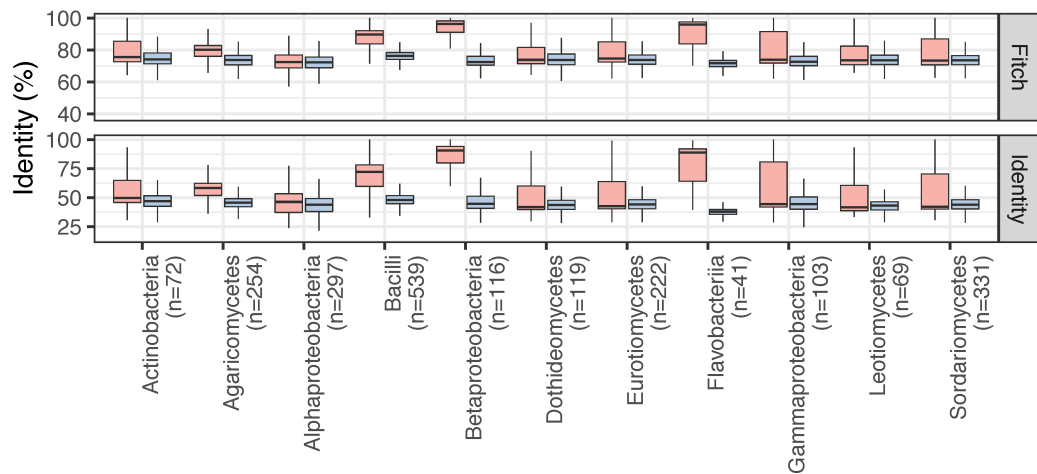

## B. OXC

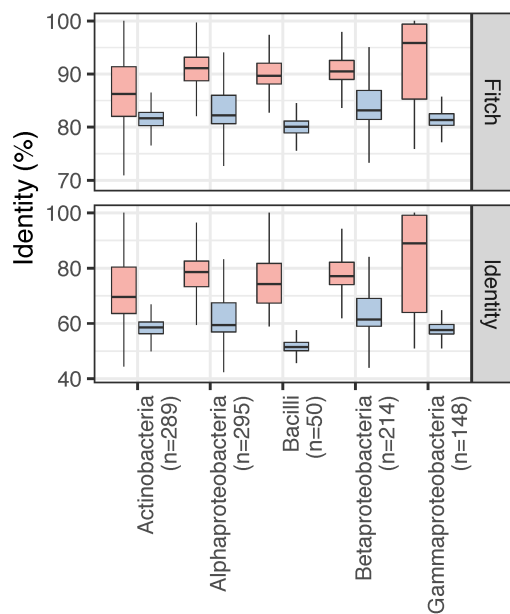

## C. FRC

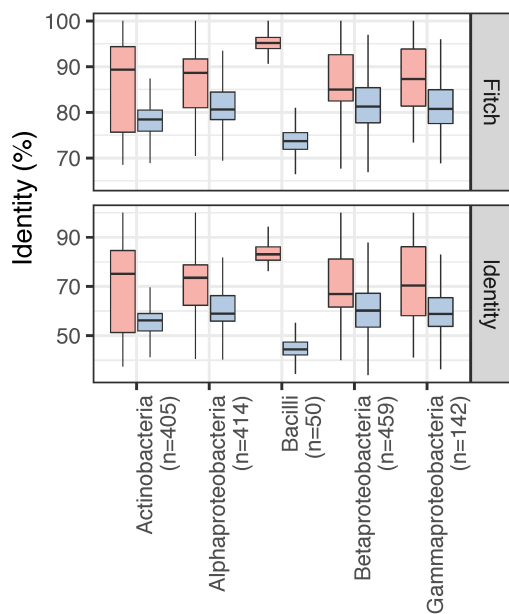

Supplement: supp [file elife_poa_e63642_Figure_1_figure_supplement_1.pdf › elife_poa_e63642_Figure_1_figure_supplement_1.pdf]

category Inter-species Intra-species

## A. OXDD

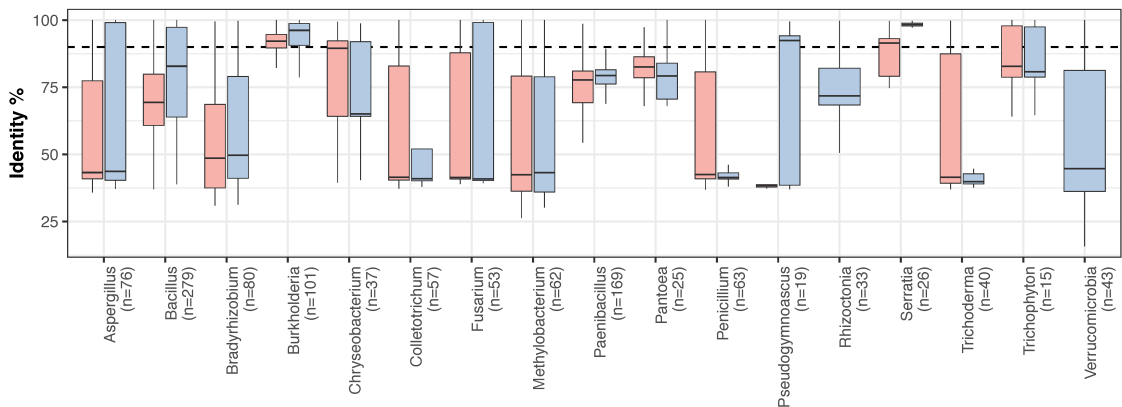

## B. OXC

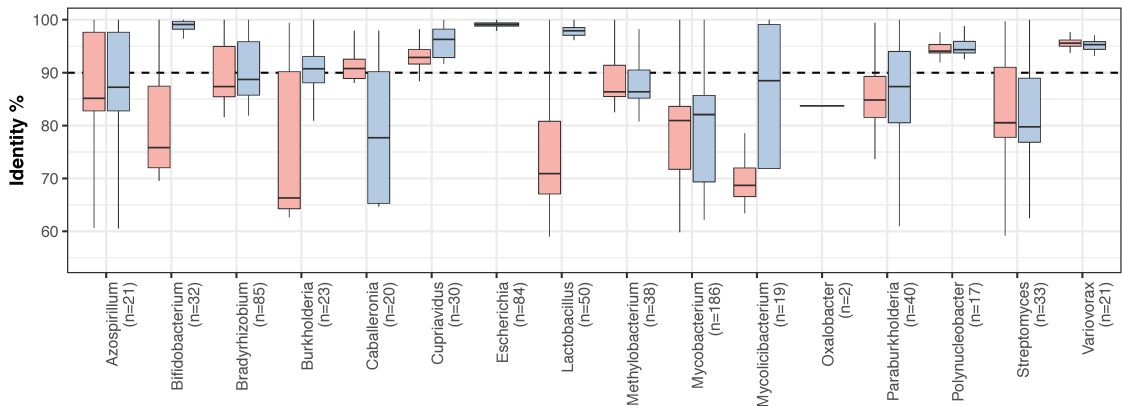

## C. FRC

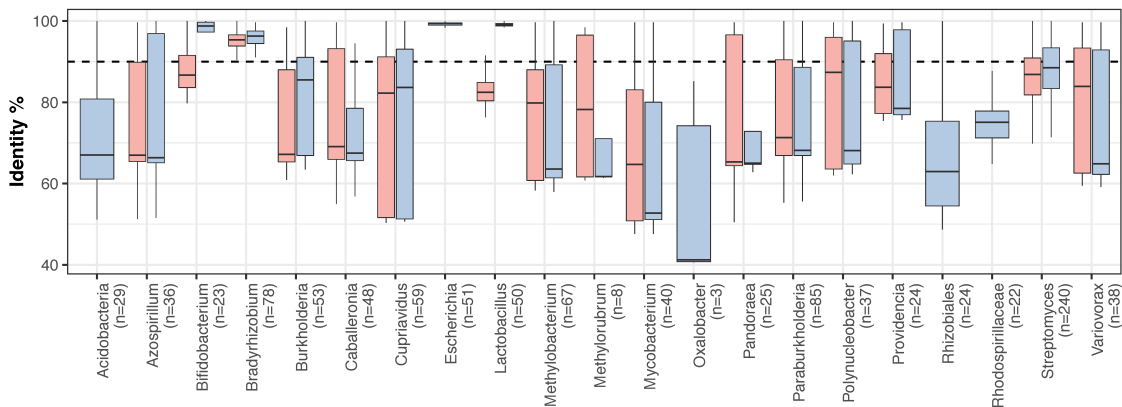

Supplement: supp [file elife_poa_e63642_Figure_2_figure_supplement_2.pdf › elife_poa_e63642_Figure_2_figure_supplement_2.pdf]

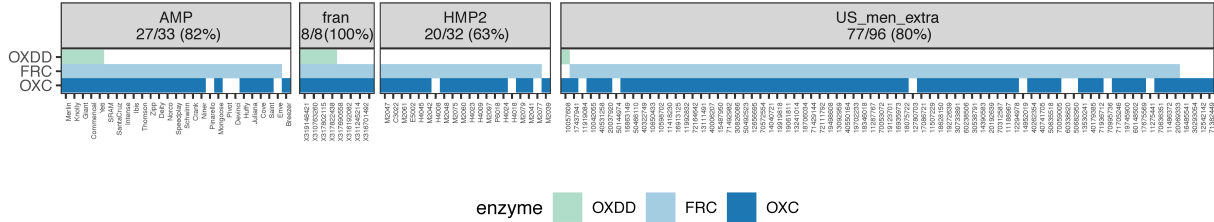

Supplement: supp [file elife_poa_e63642_Figure_2_figure_supplement_3.pdf › elife_poa_e63642_Figure_2_figure_supplement_3.pdf]

## A. US\_men

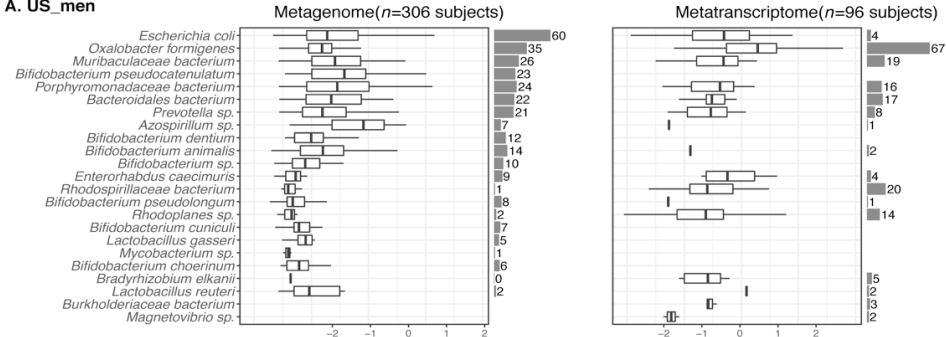

## B. HMP2

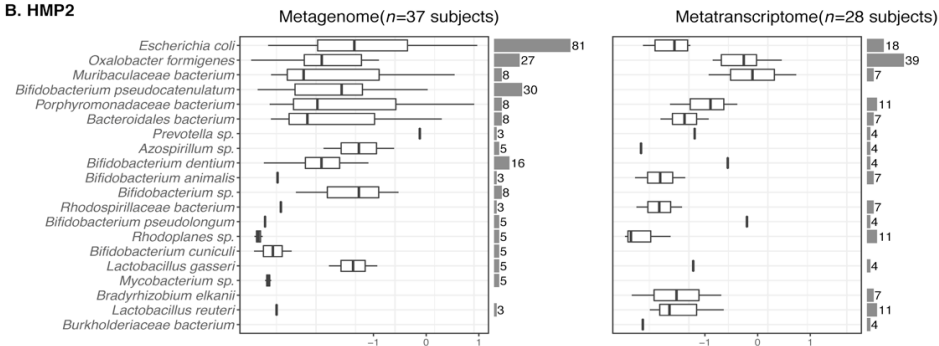

## C. AMP

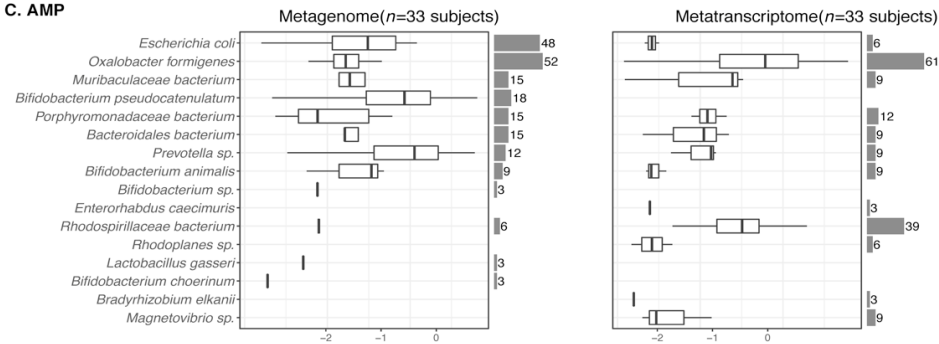

## D. fran

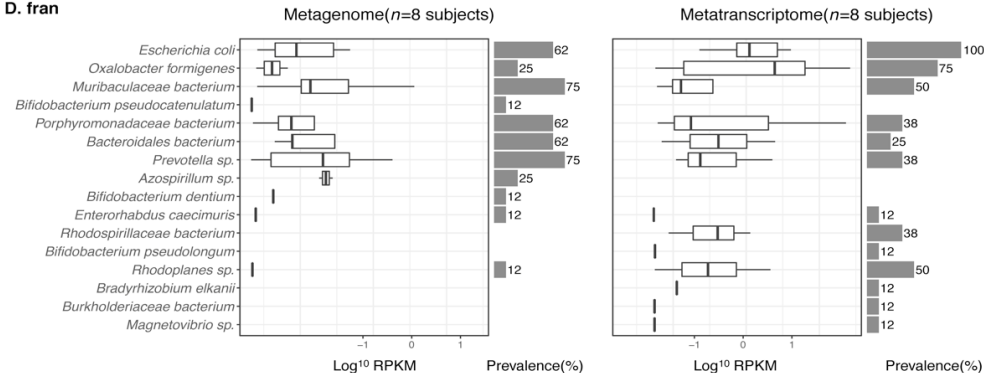

Supplement: supp [file elife_poa_e63642_Figure_3_figure_supplement_1.pdf › elife_poa_e63642_Figure_3_figure_supplement_1.pdf]

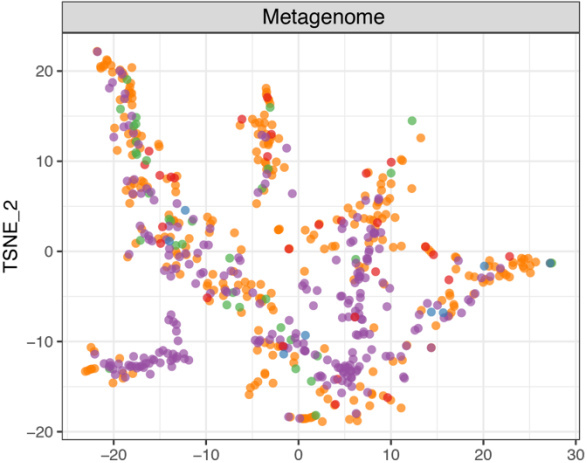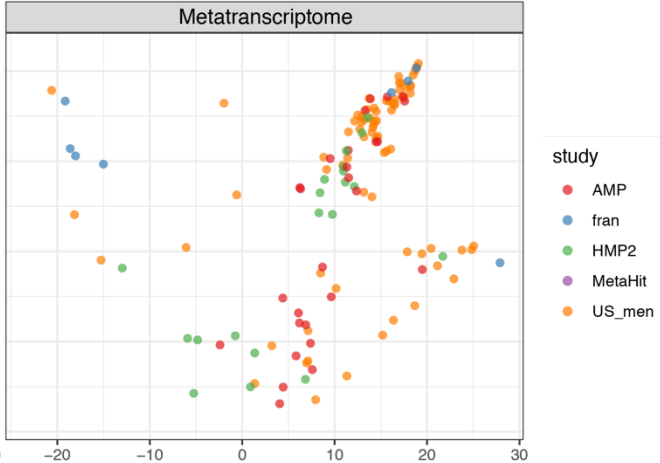

Supplement: supp [file elife_poa_e63642_Figure_3_figure_supplement_2.pdf › elife_poa_e63642_Figure_3_figure_supplement_2.pdf]

Metagenome( $n=660$  subjects)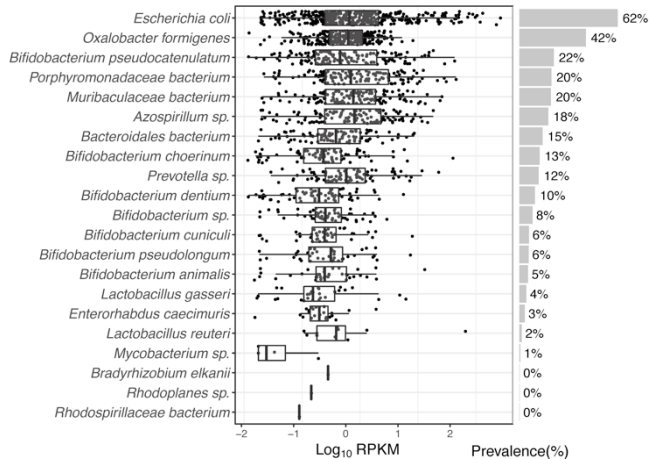Metatranscriptome( $n=165$  subjects)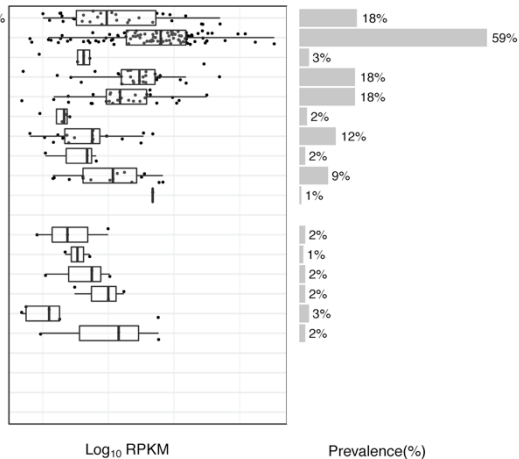

Supplement: supp [file elife_poa_e63642_Figure_3_figure_supplement_3.pdf › elife_poa_e63642_Figure_3_figure_supplement_3.pdf]

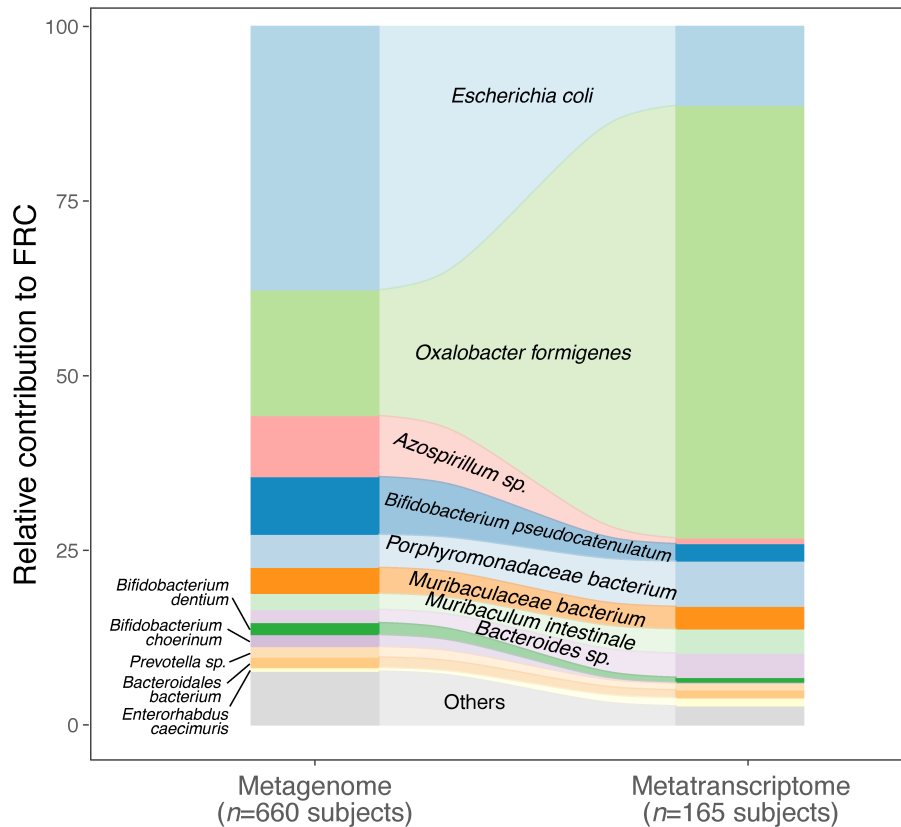

Supplement: supp [file elife_poa_e63642_Figure_3_figure_supplement_4.pdf › elife_poa_e63642_Figure_3_figure_supplement_4.pdf]

**A**

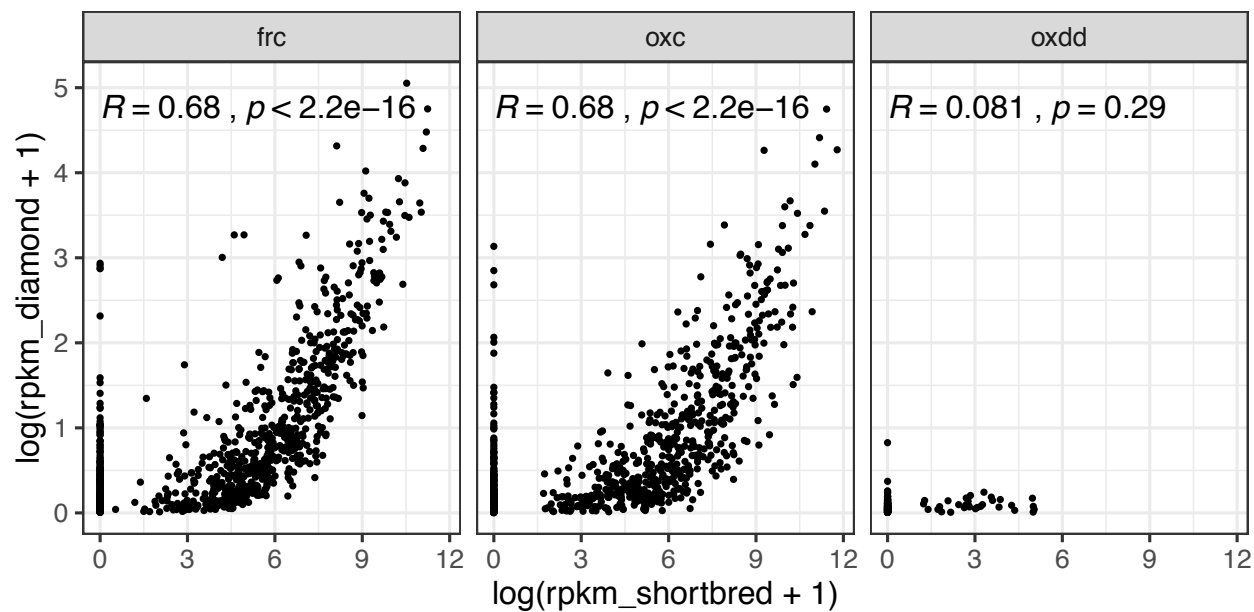

**B**

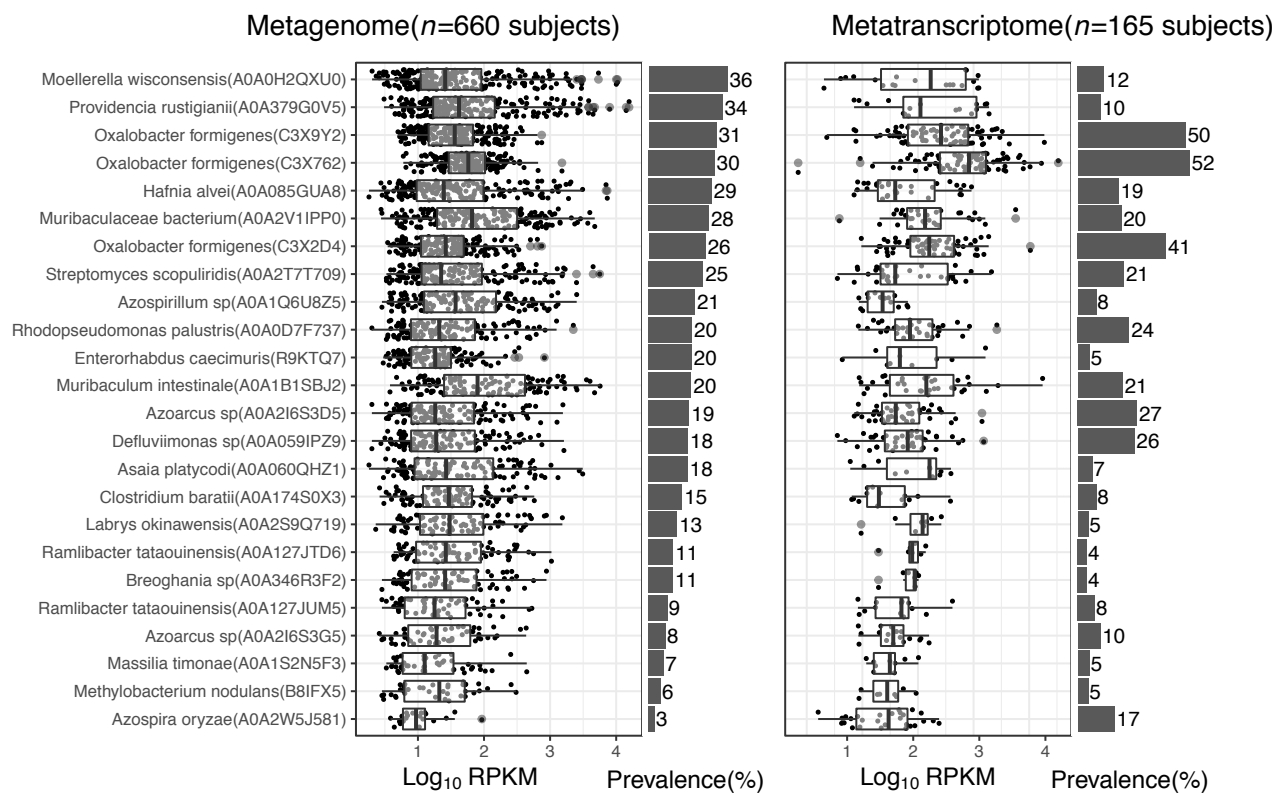

Supplement: supp [file elife_poa_e63642_Figure_3_figure_supplement_5.pdf › elife_poa_e63642_Figure_3_figure_supplement_5.pdf]

A

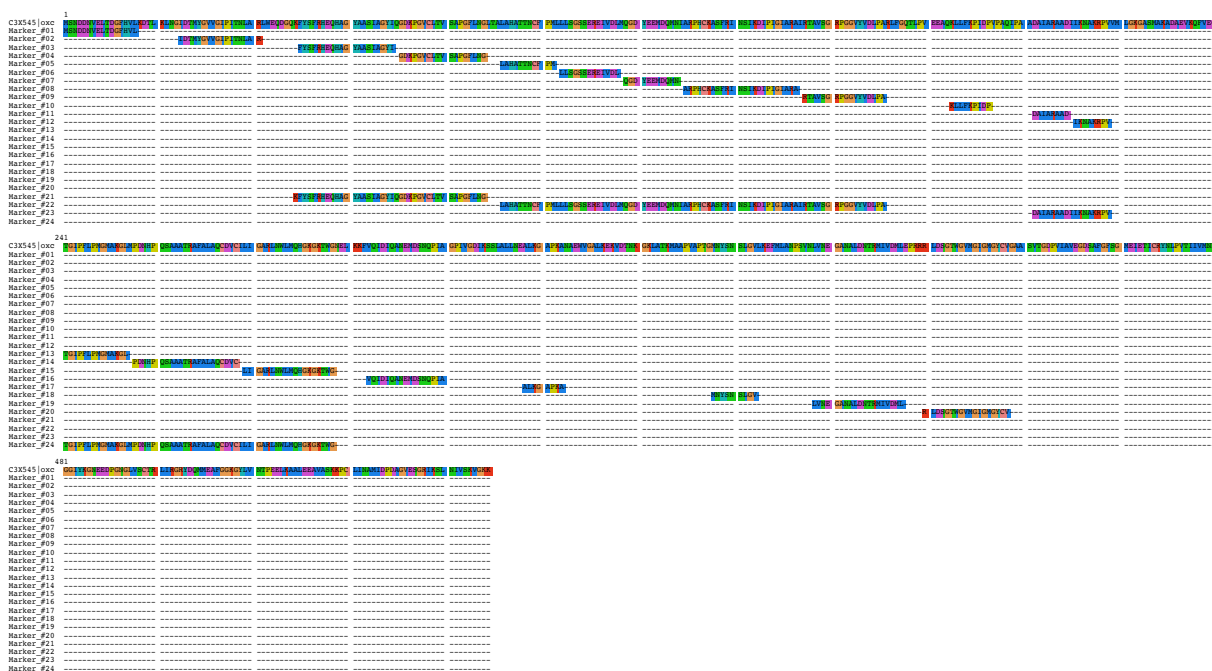

B

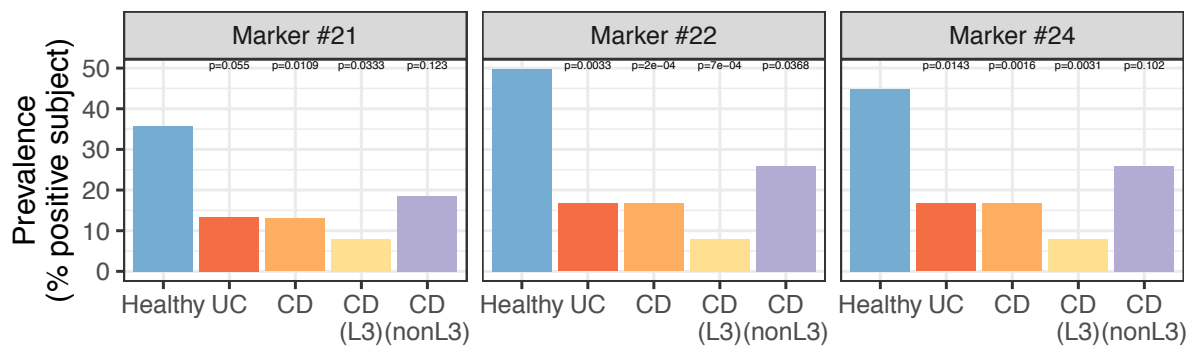

C

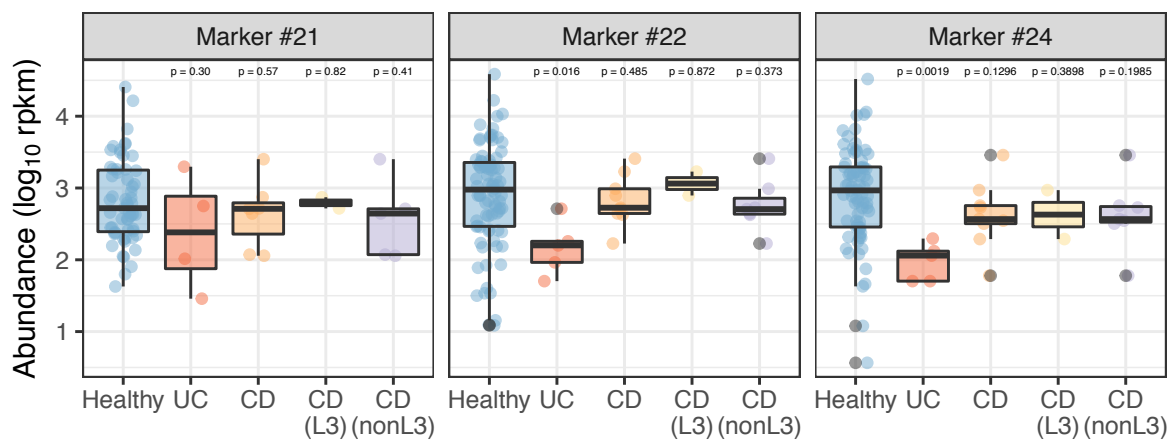

Supplement: supp [file elife_poa_e63642_Figure_3_figure_supplement_6.pdf › elife_poa_e63642_Figure_3_figure_supplement_6.pdf]

Fecal oxalate  $\text{Log}_{10}$  relative abundance

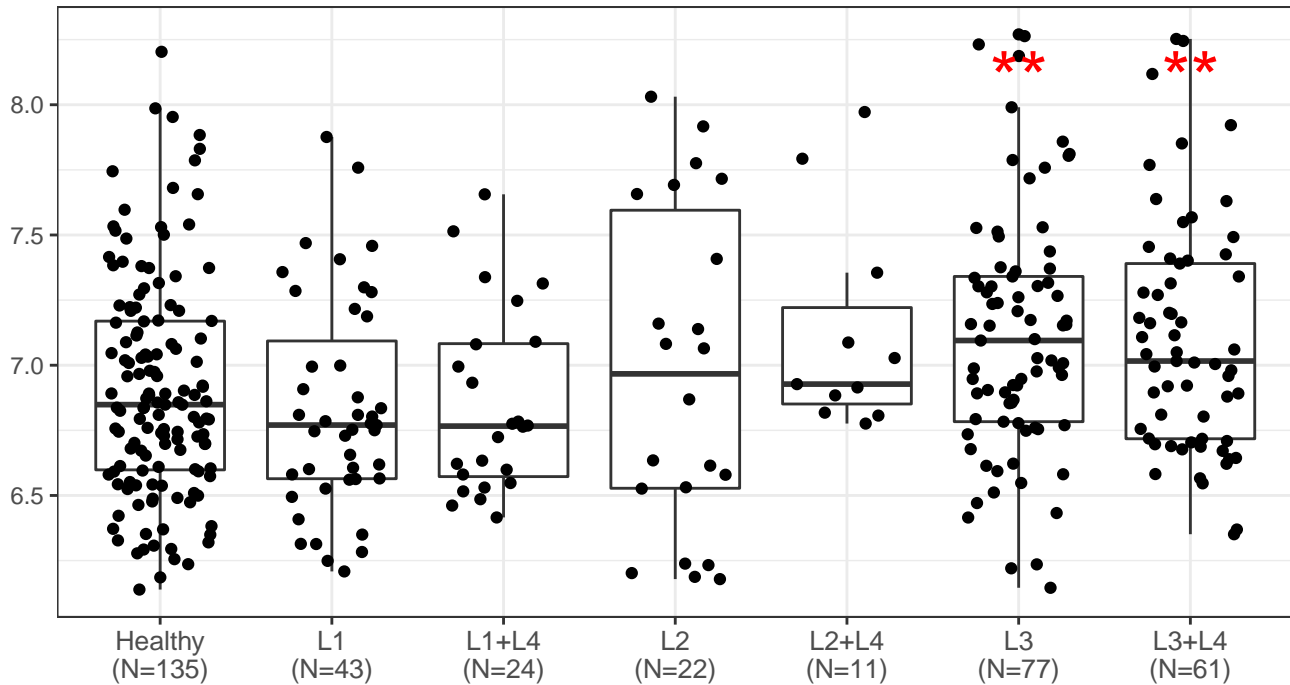

IBD phenotype by Montreal classification

Supplement: supp [file elife_poa_e63642_Figure_4_figure_supplement_1.pdf › elife_poa_e63642_Figure_4_figure_supplement_1.pdf]

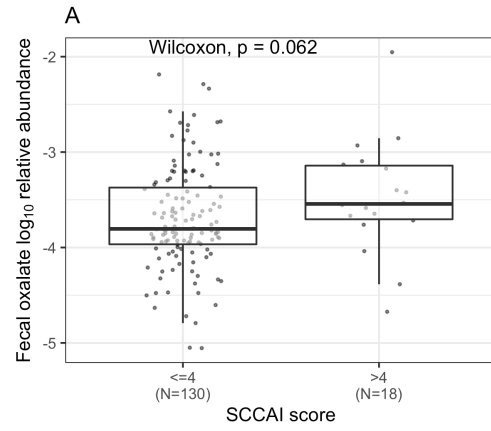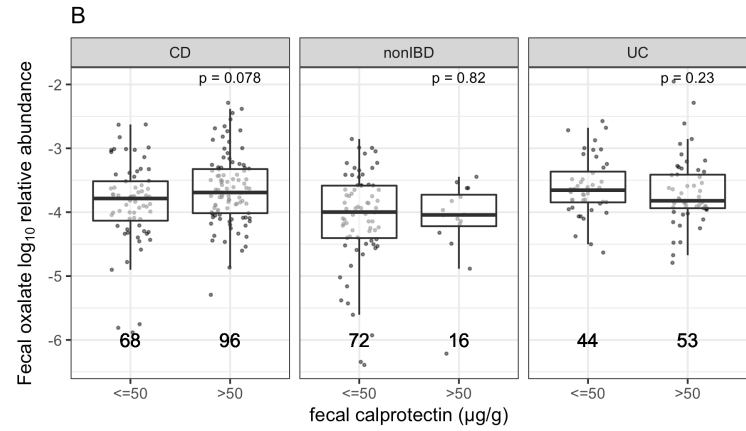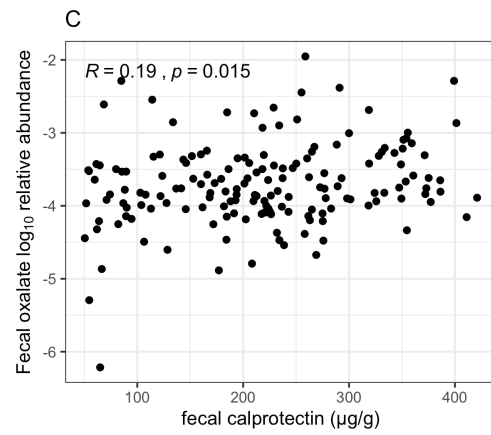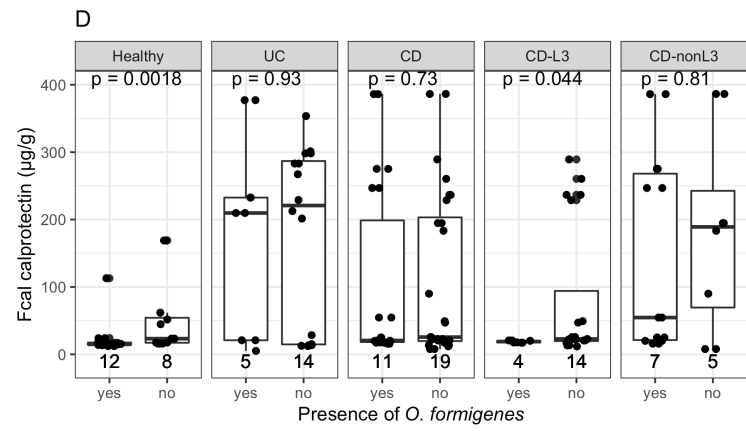

Supplement: supp [file elife_poa_e63642_Figure_4_figure_supplement_2.pdf › elife_poa_e63642_Figure_4_figure_supplement_2.pdf]

**A**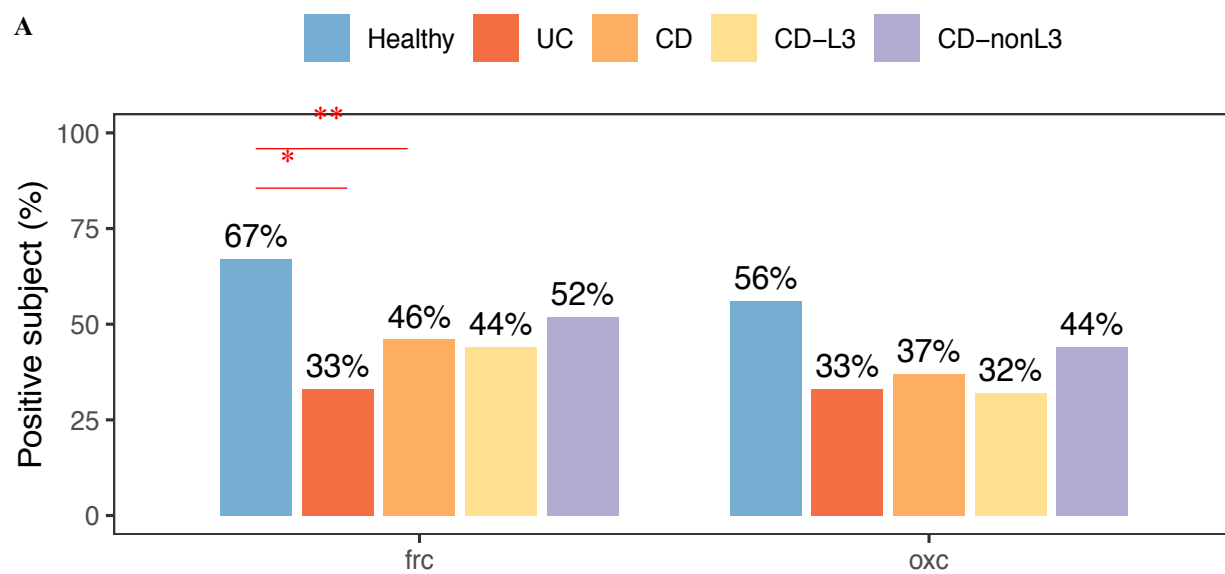**B**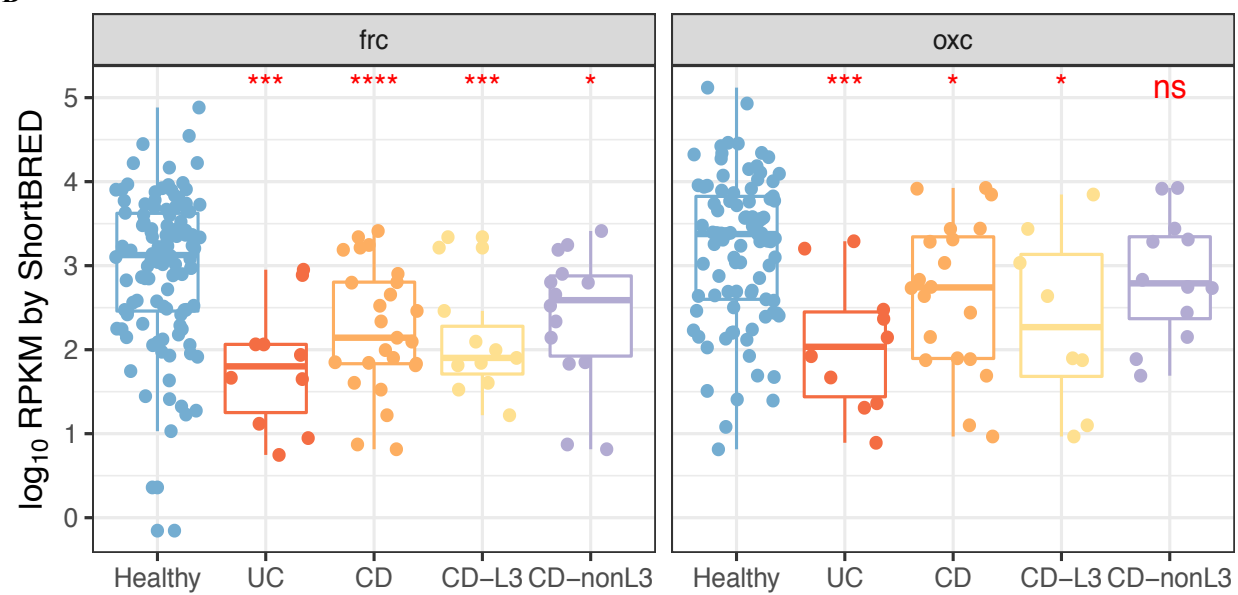

Supplement: supp [file elife_poa_e63642_Figure_4_figure_supplement_3.pdf › elife_poa_e63642_Figure_4_figure_supplement_3.pdf]

A.

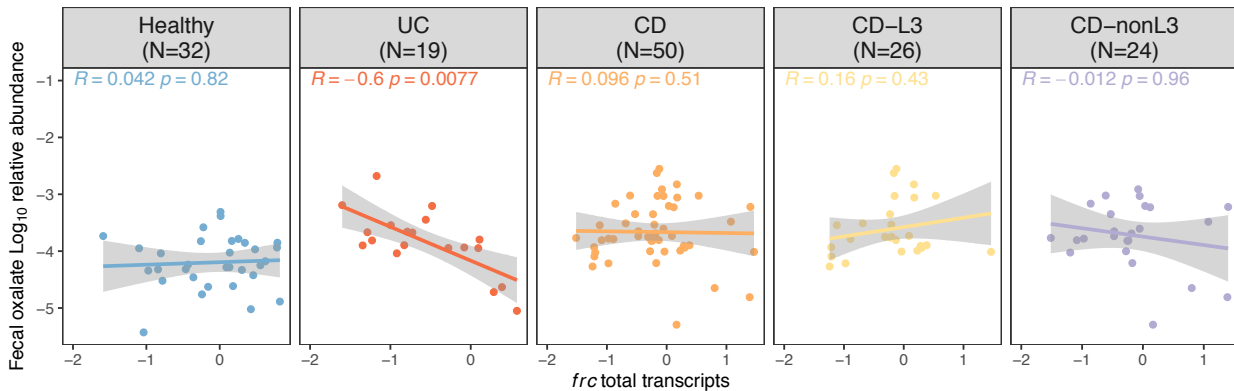

B.

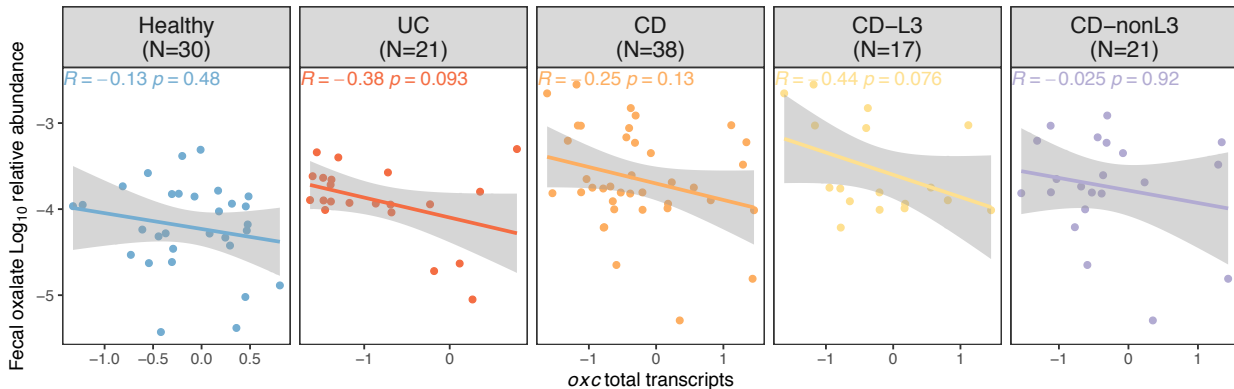

Supplement: supp [file elife_poa_e63642_Figure_4_figure_supplement_4.pdf › elife_poa_e63642_Figure_4_figure_supplement_4.pdf]

**A**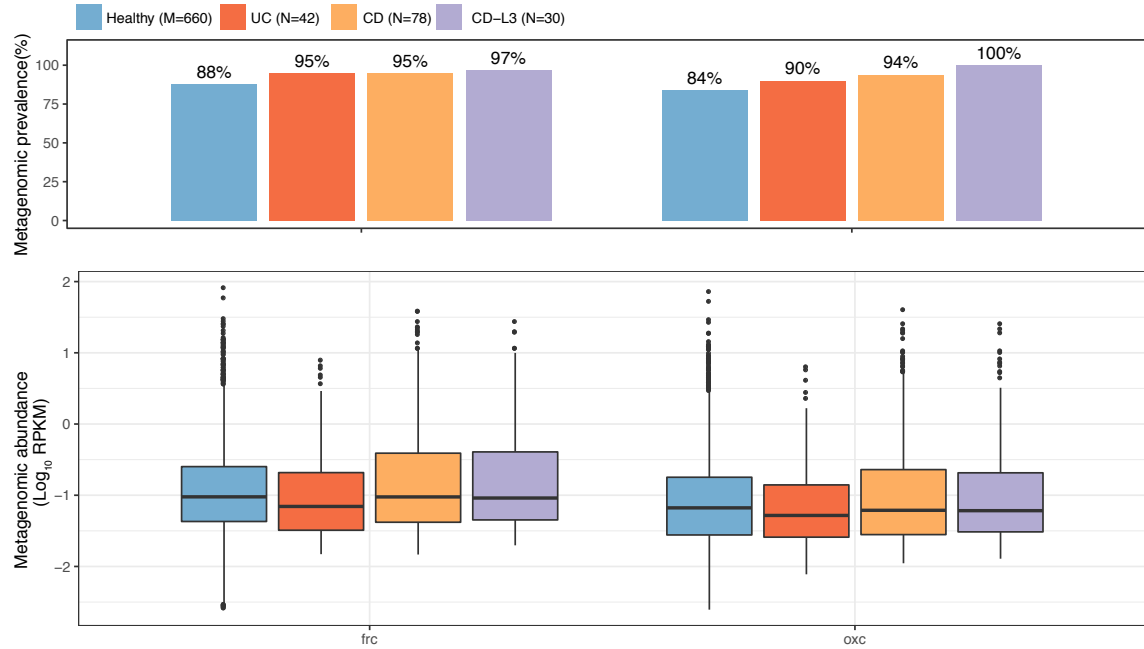**B**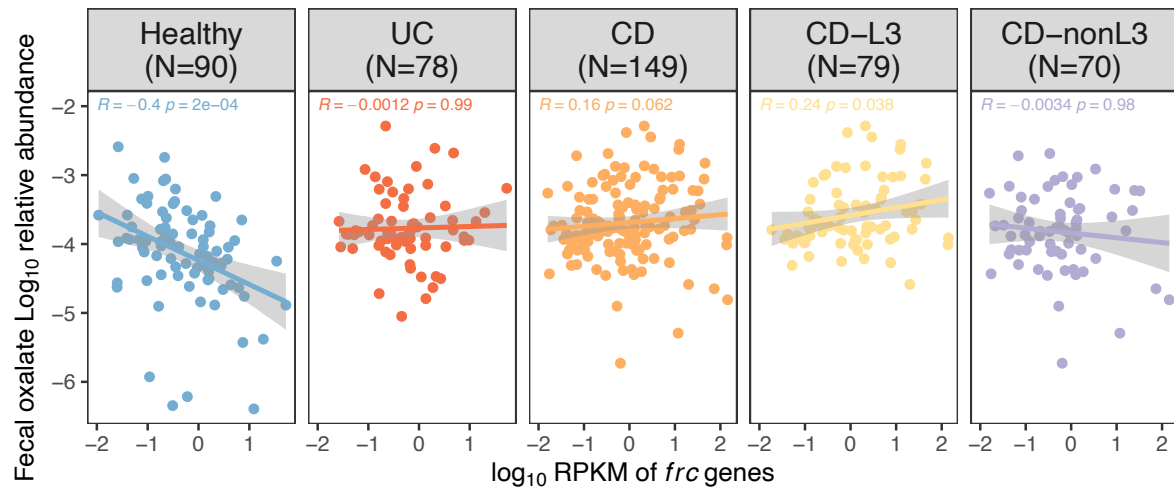**C**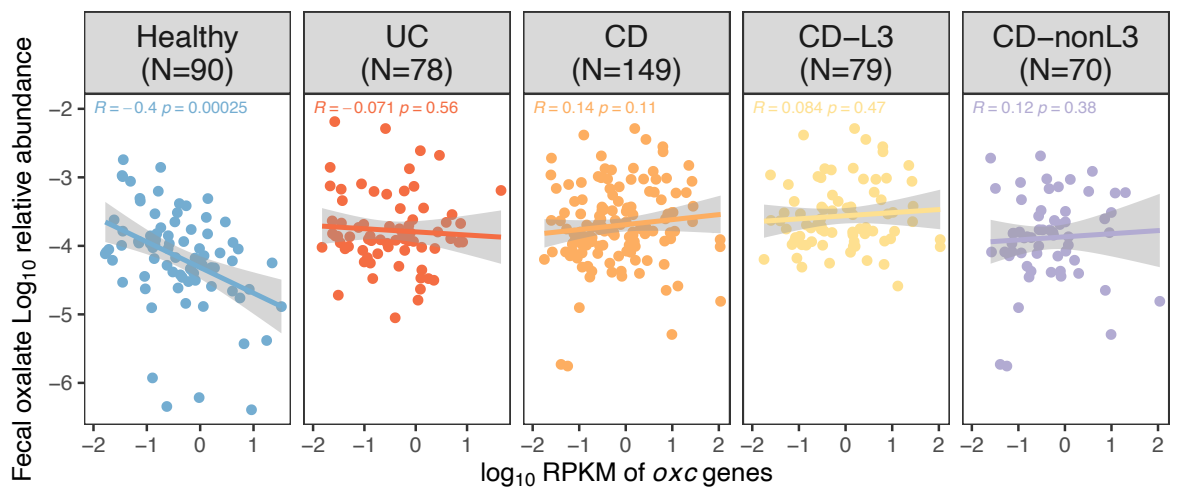

Supplement: supp [file elife_poa_e63642_Figure_4_figure_supplement_5.pdf › elife_poa_e63642_Figure_4_figure_supplement_5.pdf]

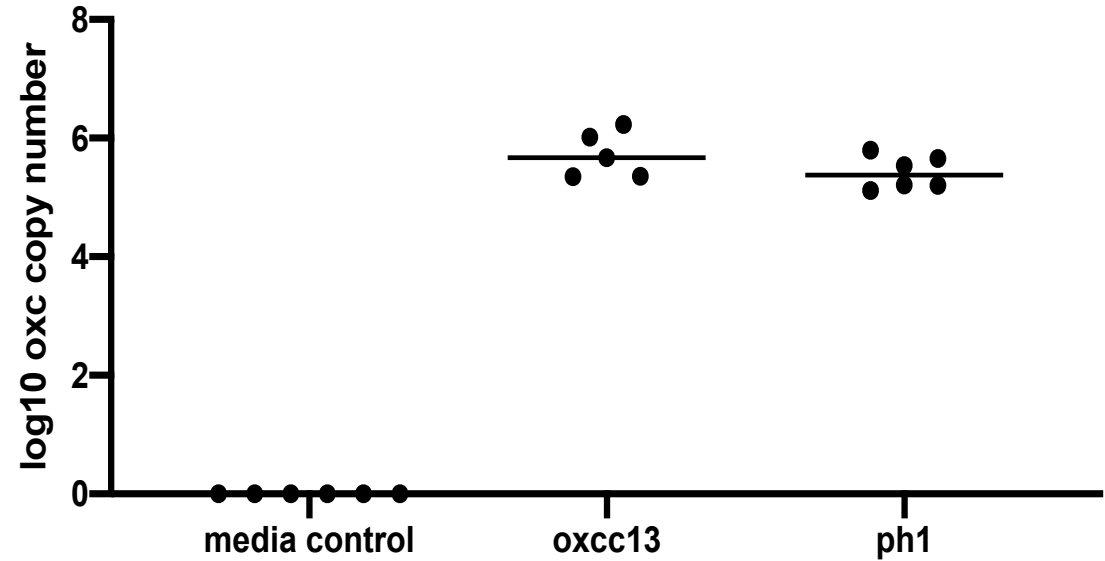

Supplement: supp [file elife_poa_e63642_Figure_6_figure_supplement_1.pdf › elife_poa_e63642_Figure_6_figure_supplement_1.pdf]

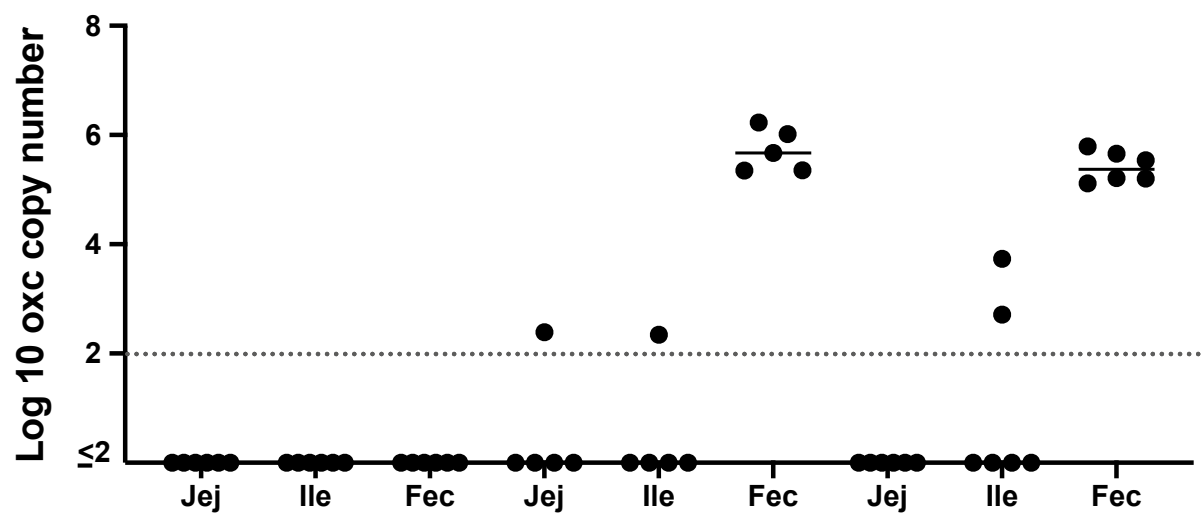

Supplement: supp [file elife_poa_e63642_Figure_6_figure_supplement_2.pdf › elife_poa_e63642_Figure_6_figure_supplement_2.pdf]
